# Supplementary material for: Temporal and Dose-Dependent Hepatic Gene Expression Patterns in Mice Provide New Insights into TCDD-Mediated Hepatotoxicity
Source: Oxford University Press journal article supplement (doi:10.1093/toxsci/kfi162), 2005-03-30

This image shows a full page of blank graph paper. The grid consists of small squares formed by thin black lines. There are approximately 20 columns and 30 rows of squares. A slightly thicker vertical line runs down the left side, creating a margin. The paper is otherwise completely blank, with no text or markings other than the grid itself.

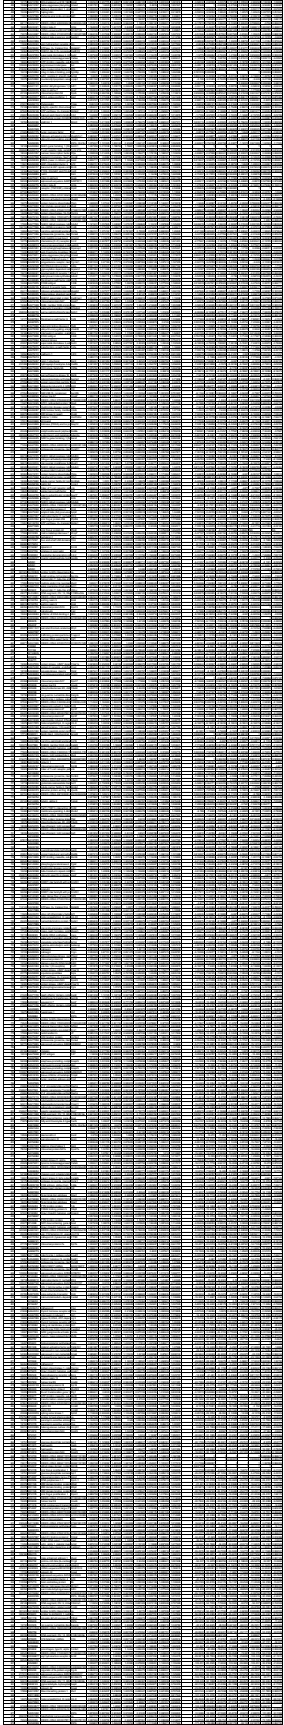

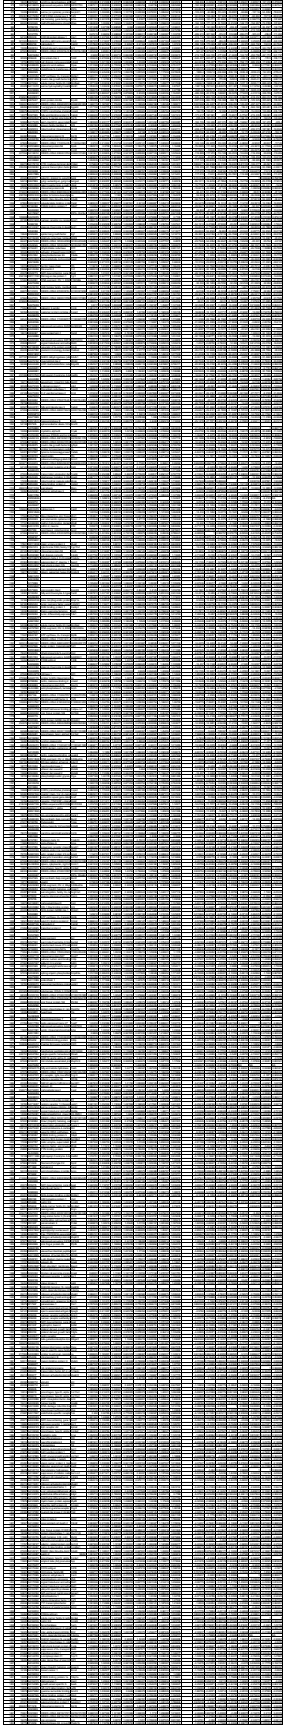

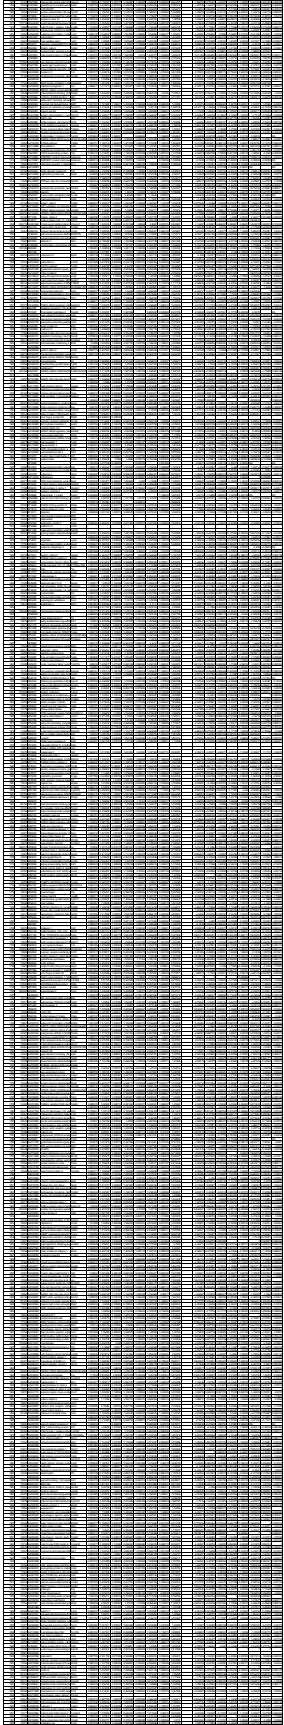

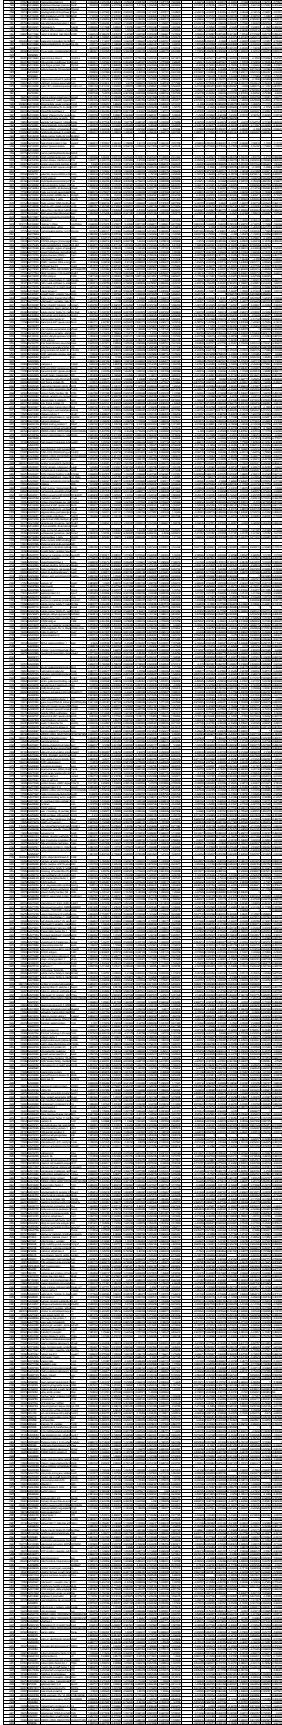

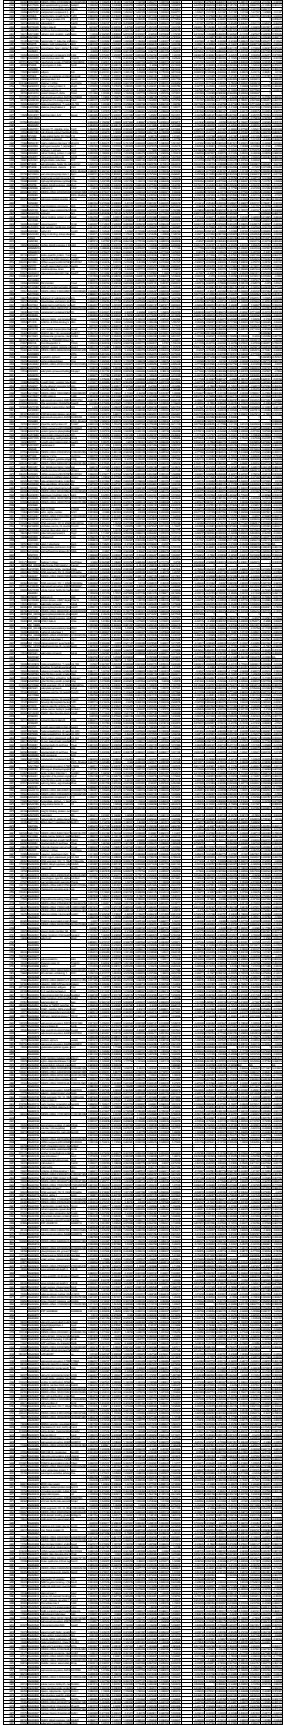

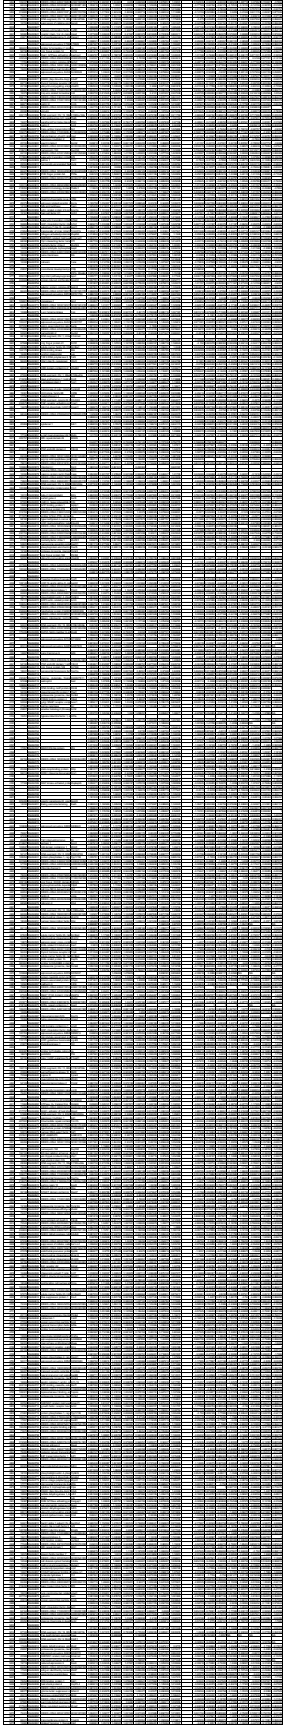

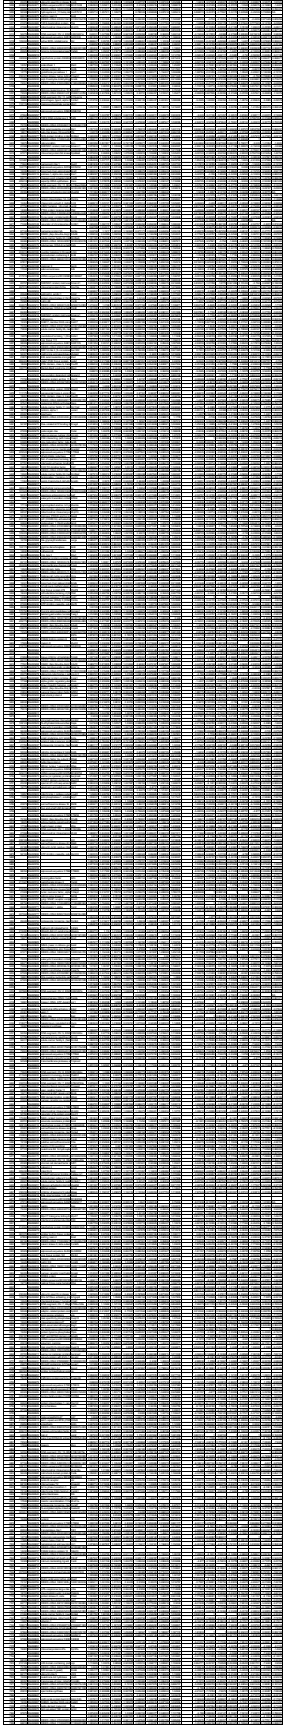

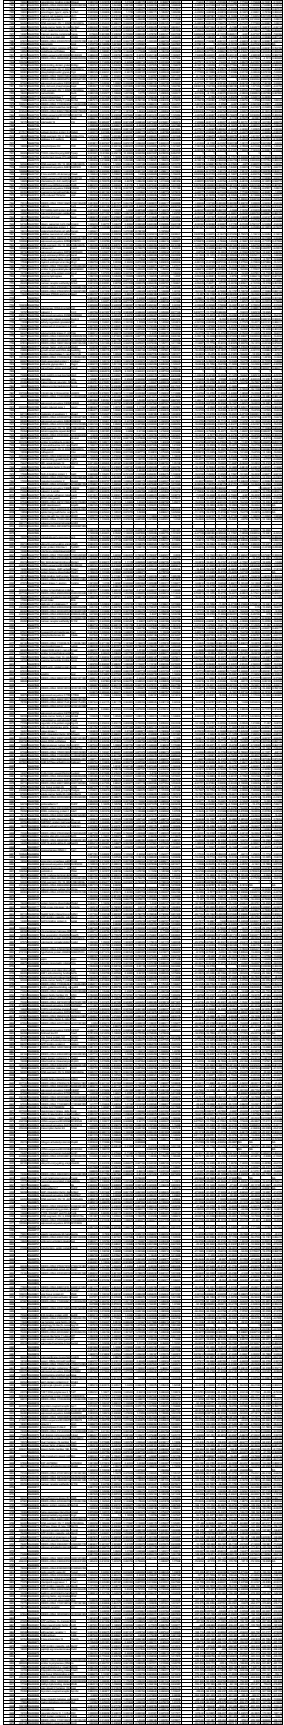

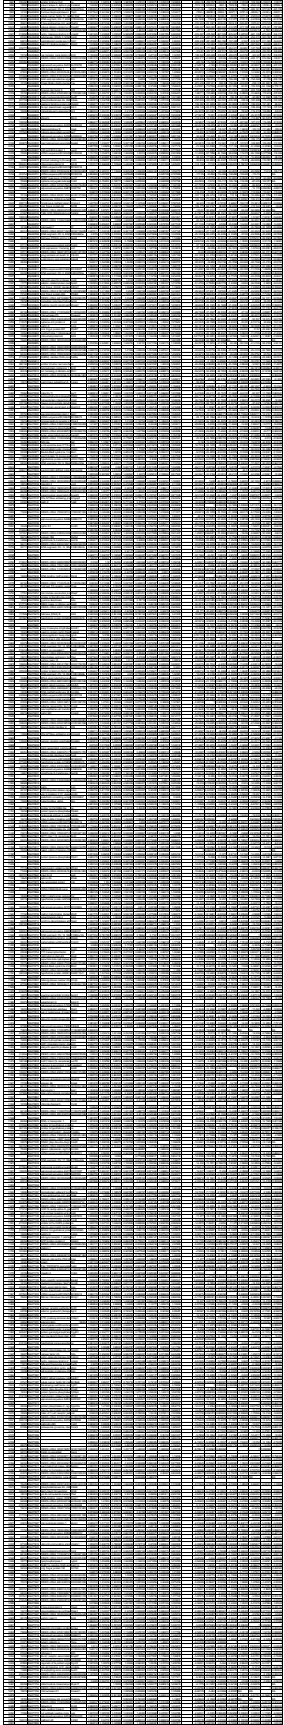

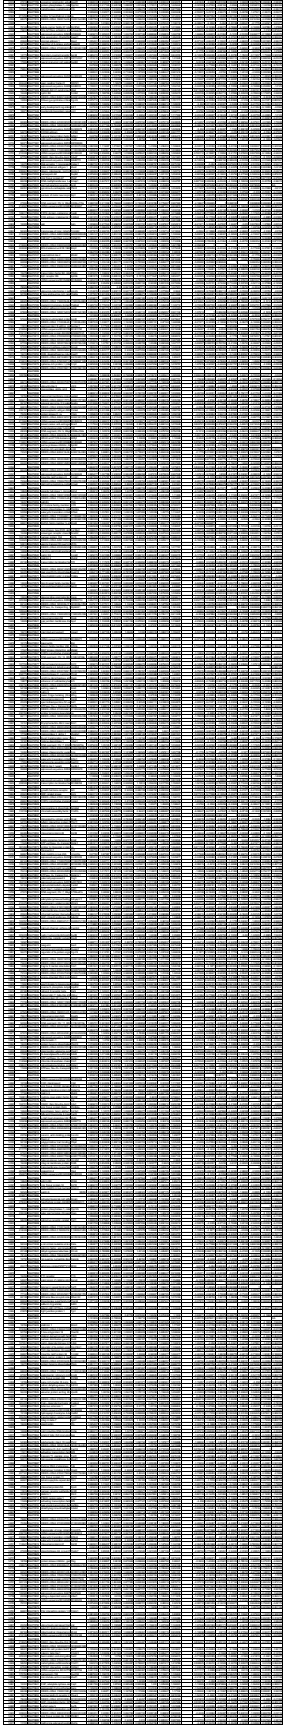

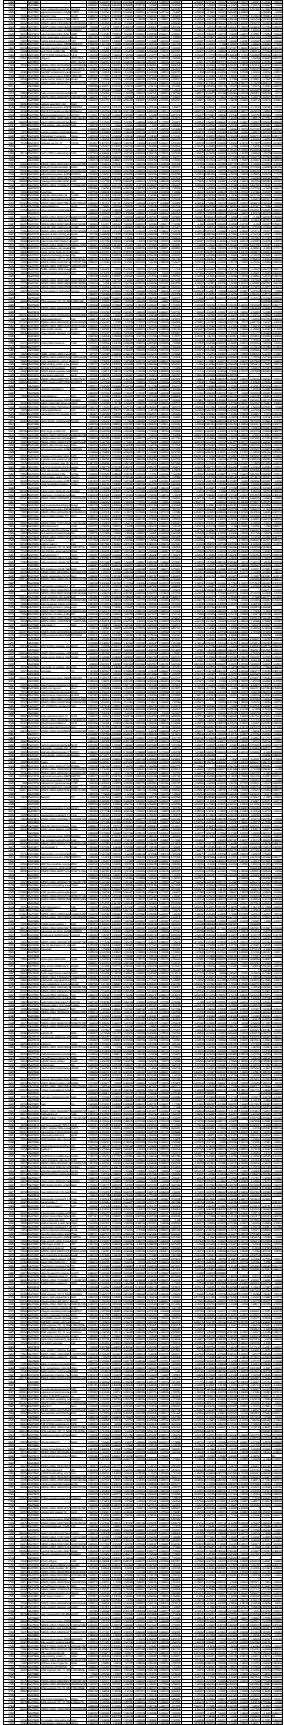

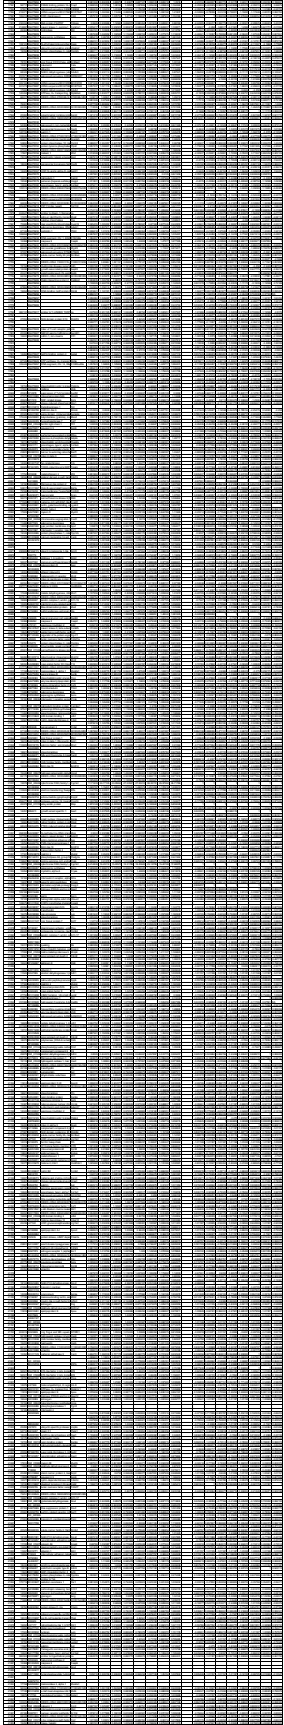

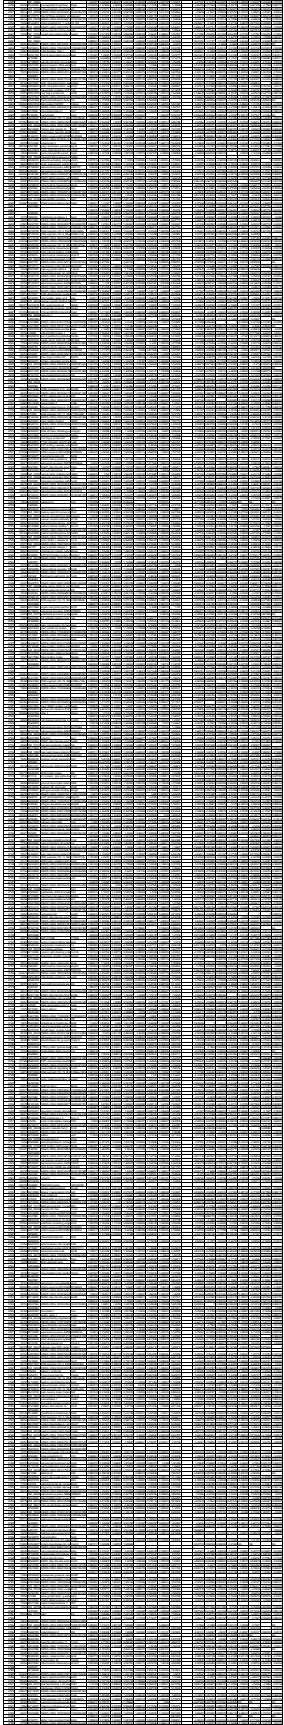

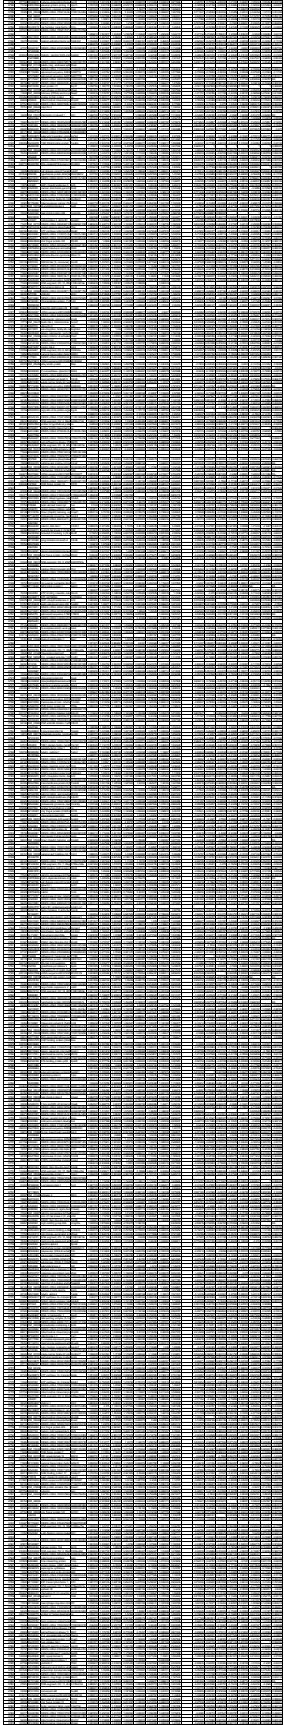

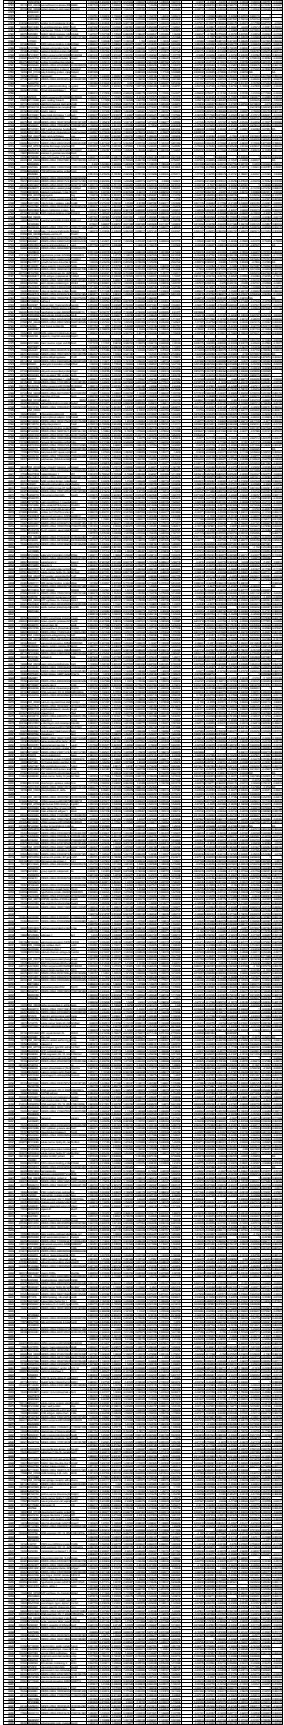

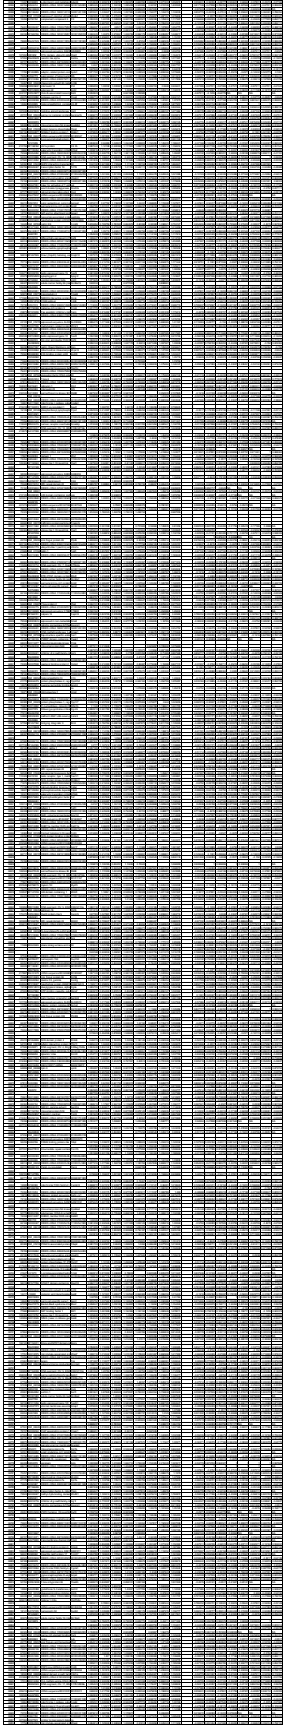

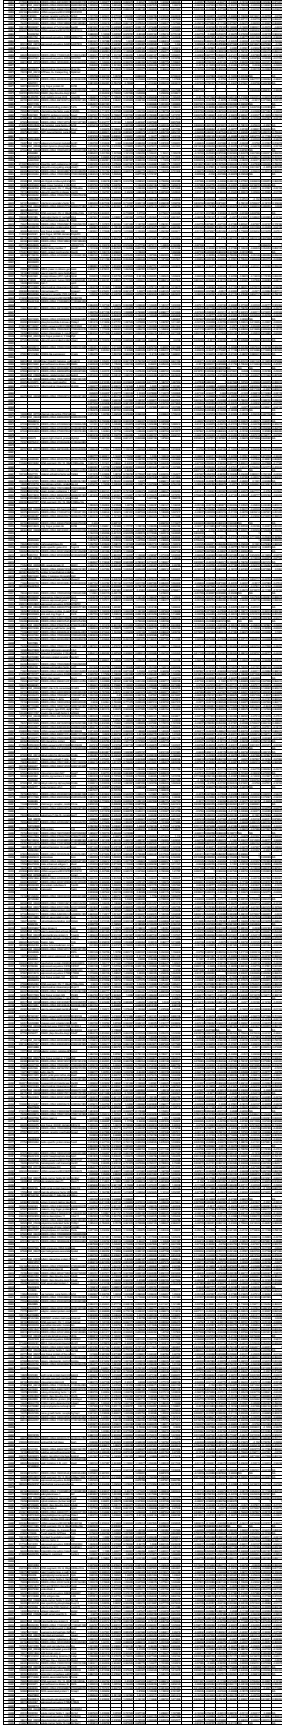

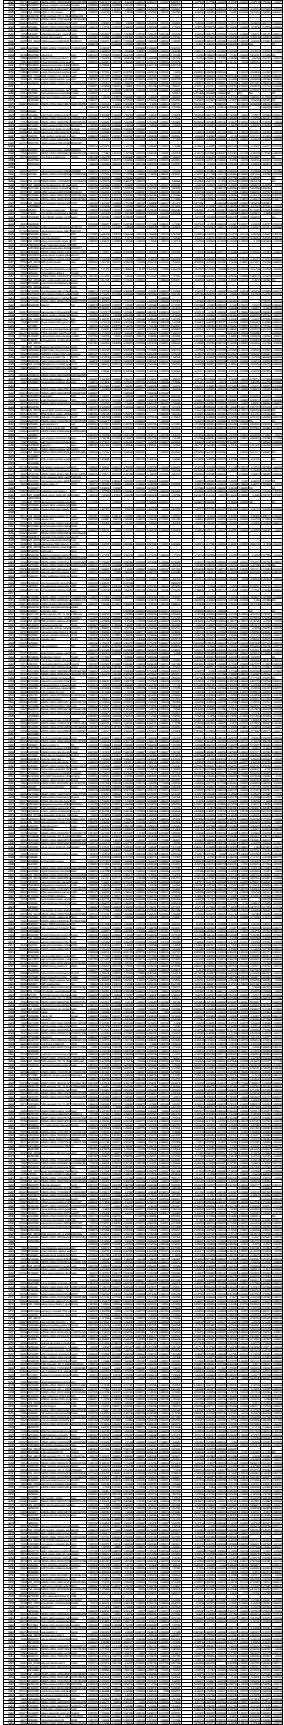

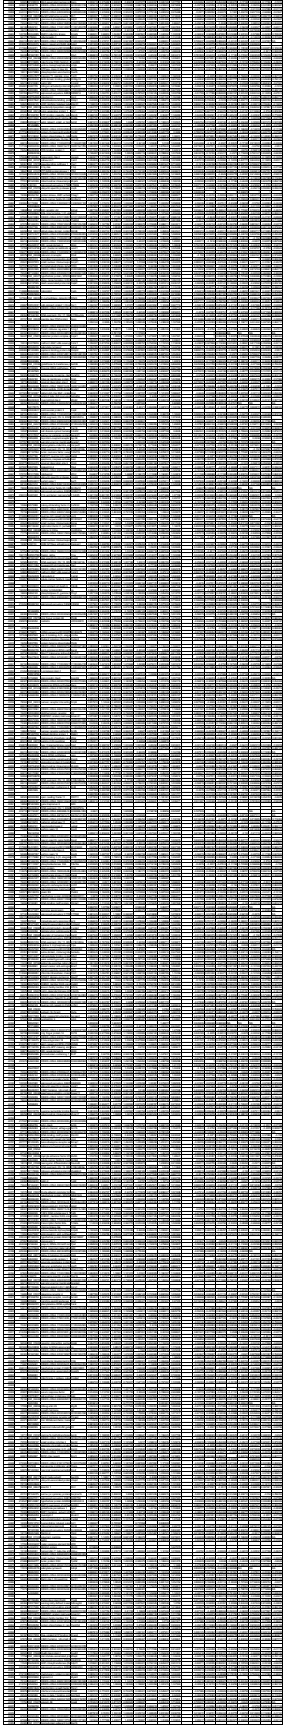

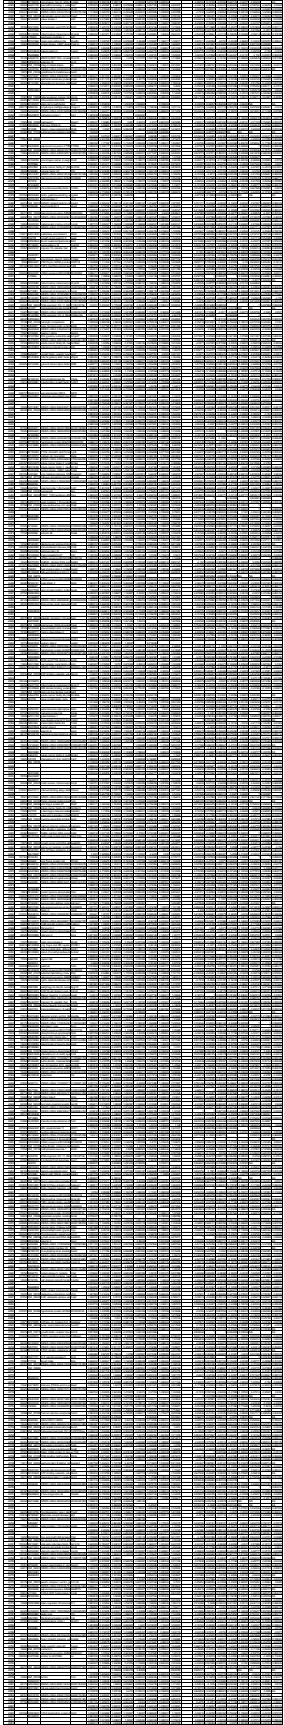

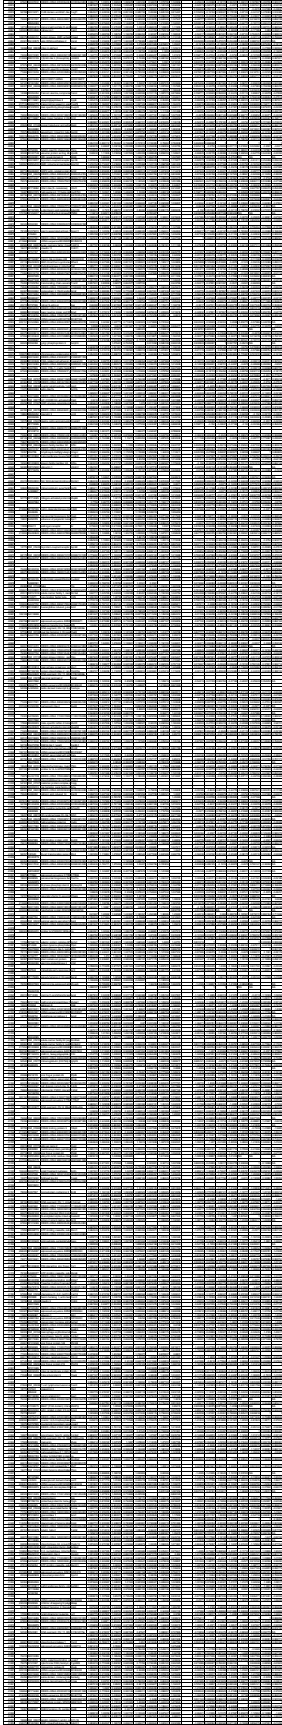

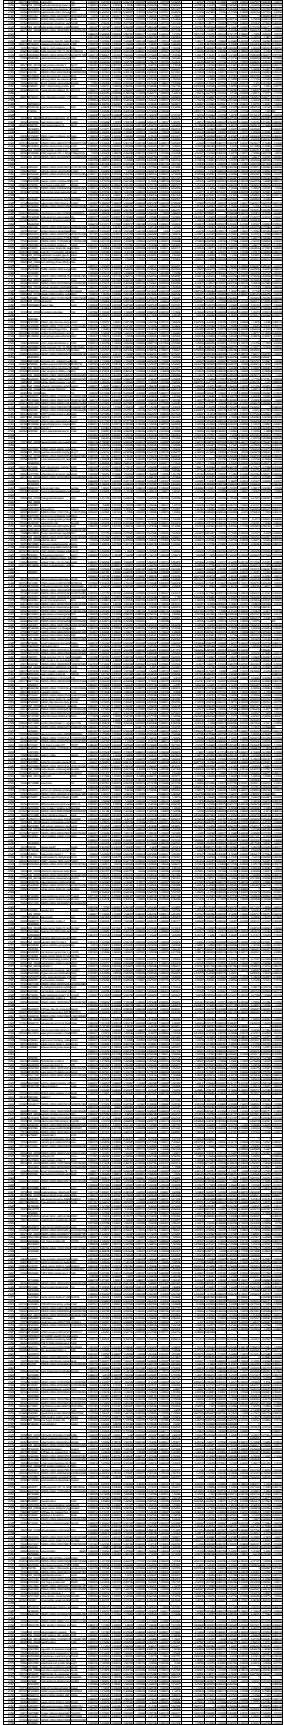

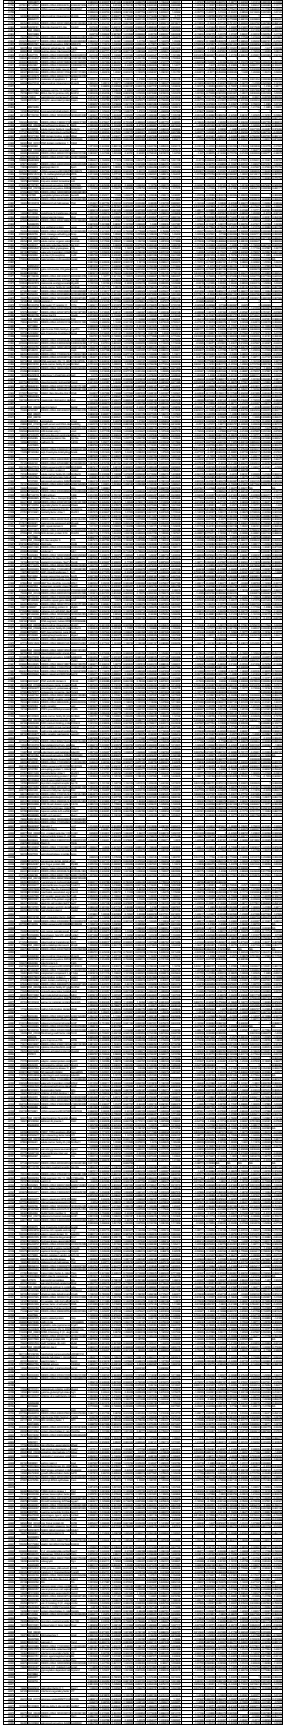

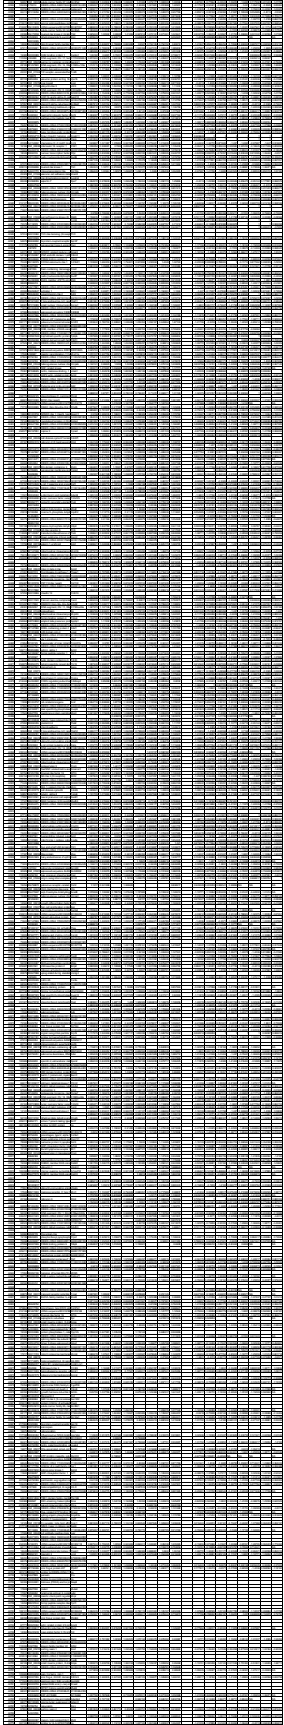

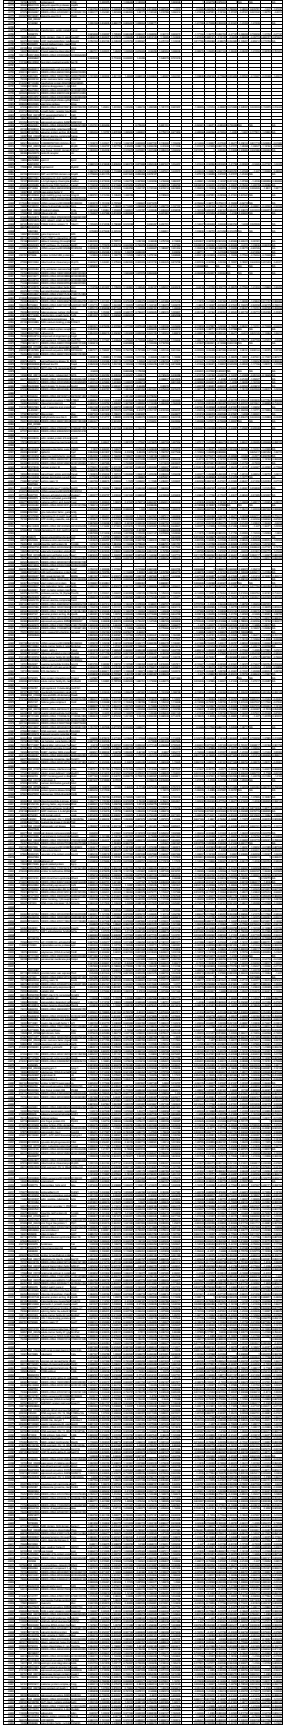

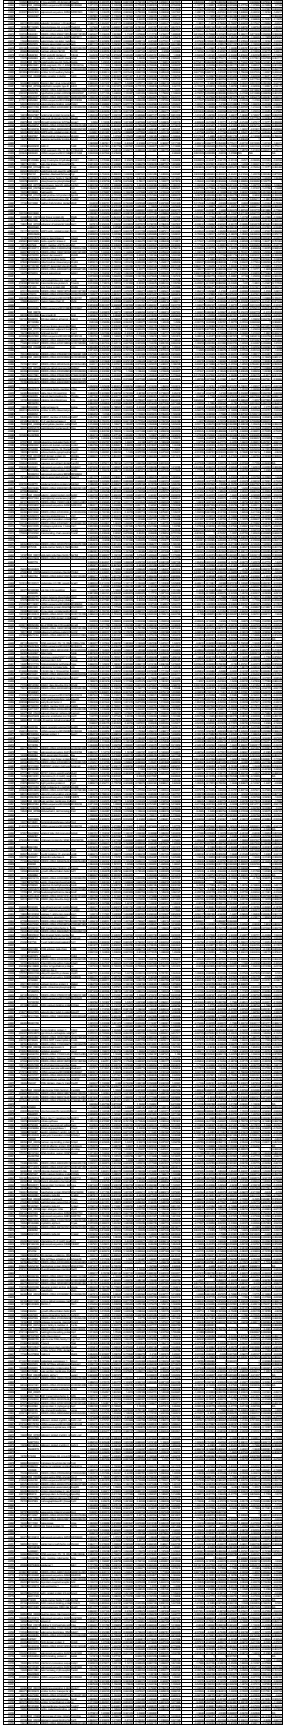

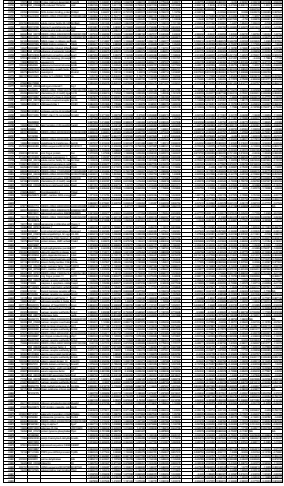

Supplement: kfi162_Supplementary_Data.zip [file kfi162_Supplementary_Data.zip › kfi162supptable4.pdf]
