# Supplementary material for: Temporal and Dose-Dependent Hepatic Gene Expression Patterns in Mice Provide New Insights into TCDD-Mediated Hepatotoxicity
Source: Oxford University Press journal article supplement (doi:10.1093/toxsci/kfi162), 2005-03-30
Supplement: kfi162_Supplementary_Data.zip [file kfi162_Supplementary_Data.zip]

Archive with 10 entries (10 files):
- kfi162supptable1.xls
- kfi162supptable5.xls
- kfi162supptable1.pdf
- kfi162supptable3.xls
- kfi162supptable4.pdf
- kfi162supptable2.pdf
- kfi162supptable4.xls
- kfi162supptable5.pdf
- kfi162supptable2.xls
- kfi162supptable3.pdf
