# Supplementary material for: Temporal and Dose-Dependent Hepatic Gene Expression Patterns in Mice Provide New Insights into TCDD-Mediated Hepatotoxicity
Source: Oxford University Press journal article supplement (doi:10.1093/toxsci/kfi162), 2005-03-30
Supplement: kfi162_Supplementary_Data.zip [file kfi162_Supplementary_Data.zip › kfi162supptable1.pdf]

**Supplementary Table 1. Breakdown of clones and genes represented on the mouse custom cDNA microarray**

|                                                | <b>Custom mouse cDNA array</b> |
|------------------------------------------------|--------------------------------|
| <b>Clones on array</b>                         | 13362                          |
| <b>Unique Genes on array</b>                   | 7952                           |
| <b>Genes Represented By More Than 2 Clones</b> | 568                            |
| <b>Clones Not Representing A Known Gene</b>    | 1307                           |
| <b>UniGene Build</b>                           | 144                            |
