# Supplementary material for: Temporal and Dose-Dependent Hepatic Gene Expression Patterns in Mice Provide New Insights into TCDD-Mediated Hepatotoxicity
Source: Oxford University Press journal article supplement (doi:10.1093/toxsci/kfi162), 2005-03-30
Supplement: kfi162_Supplementary_Data.zip [file kfi162_Supplementary_Data.zip › kfi162supptable1.xls]

## Sheet: Sheet1
	Supplementary Table 1. Breakdown of clones and genes represented on the mouse custom cDNA microarry
		Custom mouse cDNA array
	Clones on array	13362
	Unique Genes on array	7952
	Genes Represented By More Than 2 Clones	568
	Clones Not Representing A Known Gene	1307
	UniGene Build	144
