# Supplementary material for: Temporal and Dose-Dependent Hepatic Gene Expression Patterns in Mice Provide New Insights into TCDD-Mediated Hepatotoxicity
Source: Oxford University Press journal article supplement (doi:10.1093/toxsci/kfi162), 2005-03-30
Supplement: kfi162_Supplementary_Data.zip [file kfi162_Supplementary_Data.zip › kfi162supptable2.pdf]

**SupplTable 2. Gene names and primer sequences (5'-3') for transcripts verified by QRT-PCR**

| Gene Name                                             | Gene Symbol | Locus Link | Ref Seq Accession | forward primer        | reverse primer        | product size |
|-------------------------------------------------------|-------------|------------|-------------------|-----------------------|-----------------------|--------------|
| actin, beta, cytoplasmic                              | Actb        | 11461      | NM_007393         | GCTACAGCTTCACCACCACA  | TCTCCAGGGAGGAAGAGGAT  | 123          |
| carbonic anhydrase 3                                  | Car3        | 12350      | NM_007606         | CACACTTTGACCCATCATGC  | AGCTCACAGTCATGGGCTCT  | 129          |
| CD36 antigen                                          | Cd36        | 12491      | NM_007643         | GCTTGCAACTGTCAGCACAT  | GCCTTGCTGTAGCCAAGAAC  | 134          |
| cyclin-dependent kinase inhibitor 1A (P21)            | Cdkn1a      | 12575      | NM_007669         | TCTATCACTCCAAGCGCAGA  | CACACAGAGTGAGGGCTAAGG | 130          |
| cytochrome P450, family 1, subfamily a, polypeptide 1 | Cyp1a1      | 13076      | NM_009992         | AAGTGCAGATGCGGTCTTCT  | AAAGTAGGAGGCAGGCACAA  | 140          |
| cytochrome P450, family 1, subfamily a, polypeptide 2 | Cyp1a2      | 13077      | NM_009993         | ATAACAACCTCGGCCATCGAC | GCAGCAGGATGGCTAAGAAG  | 126          |
| cytochrome P450, family 1, subfamily b, polypeptide 1 | Cyp1b1      | 13078      | NM_009994         | TGCTTTTGTTCTGCCACAG   | GGGGCATGAATTCTTGAT    | 211          |
| fatty acid binding protein 5, epidermal               | Fabp5       | 16592      | NM_010634         | TGTCATGAACAATGCCACCT  | CTGGCAGCTAACTCCTGTCC  | 87           |
| growth arrest and DNA-damage-inducible 45 beta        | Gadd45b     | 17873      | NM_008655         | CTCCTGGTCACGAAGTGTCA  | TTGCCTCTGCTCTCTTCACA  | 86           |
| glyceraldehyde-3-phosphate dehydrogenase              | Gapd        | 14433      | NM_008084         | GTGGACCTCATGGCCTACAT  | TGTGAGGGAGATGCTCAGTG  | 125          |
| glutamate oxaloacetate transaminase 1, soluble        | Got1        | 14718      | NM_010324         | AGAGAAAGATGCGTGGGCTA  | TAGAGCCCGAAGTTCTTGGA  | 90           |
| glutathione S-transferase, alpha 1 (Ya)               | Gsta1       | 14857      | NM_008181         | CTGCCTTGGCAAAAGATAGG  | CCTGTTGCCCAACAAGGTAGT | 95           |
| glutathione S-transferase, pi 2                       | Gstp2       | 14870      | NM_013541         | TTGCCGATTACAACTTGCTG  | GAGCCACATAGGCAGAGAGC  | 96           |
| hypoxanthine guanine phosphoribosyl transferase       | Hprt        | 15452      | NM_013556         | AAGCCTAAGATGAGCGCAAG  | TTACTAGGCAGATGGCCACA  | 104          |
| lipocalin 2                                           | Lcn2        | 16819      | NM_008491         | CTGAATGGGTGGTGAGTGTG  | GCTCTCTGGCAACAGGAAAG  | 101          |
| lipase, hepatic                                       | Lipc        | 15450      | NM_008280         | GCTGCTGGGAACAAAAGAAG  | GATCAACTCGCCGATGTCTT  | 118          |
| lipin 2                                               | Lpin2       | 64898      | NM_022882         | CCGTTGAGTCCTGGGTAA    | GGAGGGACCTCAGATTTTCC  | 124          |
| lipoprotein lipase                                    | Lpl         | 16956      | NM_008509         | TTGTCCCATGCTGTAACCAA  | CAGGAAGCTAAGGCAGGATG  | 91           |
| myelocytomatosis oncogene                             | Myc         | 17869      | NM_010849         | ACGAGCACAAGCTCACCTCT  | TCCAGCTCCTCCTCGAGTTA  | 122          |
| Notch gene homolog 1 (Drosophila)                     | Notch1      | 18128      | NM_008714         | TTTAGAAACACGCCAGACC   | CTGCACATGCTGAGGACACT  | 141          |
| NAD(P)H dehydrogenase, quinone 1                      | Nqo1        |            | NM_008706         | TTTCTGTGGCTTCCAGGTCT  | CATCCTTCCAGGATCTGCAT  | 90           |
| phosphoenolpyruvate carboxykinase 1, cytosolic        | Pck1        | 18534      | NM_011044         | CTGGCACCTCAGTGAAGACA  | TCGATGCCTTCCCAGTAAAC  | 112          |
| TCDD-inducible poly(ADP-ribose) polymerase            | Tiparp      | 99929      | NM_178892         | TCAGGGCTTCCACACAATTA  | ACAACTGGGGTCACTGGTTT  | 130          |
| tumor necrosis factor, alpha-induced protein 2        | Tnfaip2     | 21928      | NM_009396         | GTTTCGGATCCCCTGTGACT  | GTCCCCAGAGCCAATGACTA  | 114          |
| UDP-glucose dehydrogenase                             | Ugdh        | 22235      | NM_009466         | AAGGGAAAGGCAGTCTCGTT  | TCAAGTTAGGCAGGGAAGGA  | 202          |
| UDP glycosyltransferase 1 family, polypeptide A6      | Ugt1a6      | 94284      | NM_145079         | ACACCGGAAGTAGACCATCG  | ATACCATGGGAGCCAGAGTG  | 124          |
