# Supplementary material for: Temporal and Dose-Dependent Hepatic Gene Expression Patterns in Mice Provide New Insights into TCDD-Mediated Hepatotoxicity
Source: Oxford University Press journal article supplement (doi:10.1093/toxsci/kfi162), 2005-03-30
Supplement: kfi162_Supplementary_Data.zip [file kfi162_Supplementary_Data.zip › kfi162supptable2.xls]

## Sheet: Sheet2
SupplTable 2. Gene names and primer sequences (5’- 3’) for transcripts verified by QRTPCR
Gene Name	Gene Symbol	Locus Link	Ref Seq Accession	forward primer	reverse primer	product size
actin, beta, cytoplasmic	Actb	11461	NM_007393	GCTACAGCTTCACCACCACA	TCTCCAGGGAGGAAGAGGAT	123
carbonic anhydrase 3	Car3	12350	NM_007606	CACACTTTGACCCATCATGC	AGCTCACAGTCATGGGCTCT	129
CD36 antigen	Cd36	12491	NM_007643	GCTTGCAACTGTCAGCACAT	GCCTTGCTGTAGCCAAGAAC	134
cyclin-dependent kinase inhibitor 1A (P21)	Cdkn1a	12575	NM_007669	TCTATCACTCCAAGCGCAGA	CACACAGAGTGAGGGCTAAGG	130
cytochrome P450, family 1, subfamily a, polypeptide 1	Cyp1a1	13076	NM_009992	AAGTGCAGATGCGGTCTTCT	AAAGTAGGAGGCAGGCACAA	140
cytochrome P450, family 1, subfamily a, polypeptide 2	Cyp1a2	13077	NM_009993	ATAACAACTCGGCCATCGAC	GCAGCAGGATGGCTAAGAAG	126
cytochrome P450, family 1, subfamily b, polypeptide 1	Cyp1b1	13078	NM_009994	TGCTTTTGTTTCTGCCACAG	GGGGCATGAATTCTTGTGAT	211
fatty acid binding protein 5, epidermal	Fabp5	16592	NM_010634	TGTCATGAACAATGCCACCT	CTGGCAGCTAACTCCTGTCC	87
growth arrest and DNA-damage-inducible 45 beta	Gadd45b	17873	NM_008655	CTCCTGGTCACGAACTGTCA	TTGCCTCTGCTCTCTTCACA	86
glyceraldehyde-3-phosphate dehydrogenase	Gapd	14433	NM_008084	GTGGACCTCATGGCCTACAT	TGTGAGGGAGATGCTCAGTG	125
glutamate oxaloacetate transaminase 1, soluble	Got1	14718	NM_010324	AGAGAAAGATGCGTGGGCTA	TAGAGCCCGAAGTTCTTGGA	90
glutathione S-transferase, alpha 1 (Ya)	Gsta1	14857	NM_008181	CTGCCTTGGCAAAAGATAGG	CCTGTTGCCCACAAGGTAGT	95
glutathione S-transferase, pi 2	Gstp2	14870	NM_013541	TTGCCGATTACAACTTGCTG	GAGCCACATAGGCAGAGAGC	96
hypoxanthine guanine phosphoribosyl transferase	Hprt	15452	NM_013556	AAGCCTAAGATGAGCGCAAG	TTACTAGGCAGATGGCCACA	104
lipocalin 2	Lcn2	16819	NM_008491	CTGAATGGGTGGTGAGTGTG	GCTCTCTGGCAACAGGAAAG	101
lipase, hepatic	Lipc	15450	NM_008280	GCTGCTGGGAACAAAAGAAG	GATCAACTCGCCGATGTCTT	118
lipin 2	Lpin2	64898	NM_022882	CCGTTGAGTCCTGGGTTAAA	GGAGGGACCTCAGATTTTCC	124
lipoprotein lipase	Lpl	16956	NM_008509	TTGTCCCATGCTGTAACCAA	CAGGAAGCTAAGGCAGGATG	91
myelocytomatosis oncogene	Myc	17869	NM_010849	ACGAGCACAAGCTCACCTCT	TCCAGCTCCTCCTCGAGTTA	122
Notch gene homolog 1 (Drosophila)	Notch1	18128	NM_008714	TTTAGAAACACGCCCAGACC	CTGCACATGCTGAGGACACT	141
NAD(P)H dehydrogenase, quinone 1	Nqo1		NM_008706	TTTCTGTGGCTTCCAGGTCT	CATCCTTCCAGGATCTGCAT	90
phosphoenolpyruvate carboxykinase 1, cytosolic	Pck1	18534	NM_011044	CTGGCACCTCAGTGAAGACA	TCGATGCCTTCCCAGTAAAC	112
TCDD-inducible poly(ADP-ribose) polymerase	Tiparp	99929	NM_178892	TCAGGGCTTCCACACAATTA	ACAACTGGGGTCACTGGTTT	130
tumor necrosis factor, alpha-induced protein 2	Tnfaip2	21928	NM_009396	GTTCGGATCCCACTGTGACT	GTCCCCAGAGCCAATGACTA	114
UDP-glucose dehydrogenase	Ugdh	22235	NM_009466	AAGGGAAAGGCAGTCTCGTT	TCAAGTTAGGCAGGGAAGGA	202
UDP glycosyltransferase 1 family, polypeptide A6	Ugt1a6	94284	NM_145079	ACACCGGAACTAGACCATCG	ATACCATGGGAGCCAGAGTG	124
