# Supplementary material for: Temporal and Dose-Dependent Hepatic Gene Expression Patterns in Mice Provide New Insights into TCDD-Mediated Hepatotoxicity
Source: Oxford University Press journal article supplement (doi:10.1093/toxsci/kfi162), 2005-03-30
Supplement: kfi162_Supplementary_Data.zip [file kfi162_Supplementary_Data.zip › kfi162supptable3.xls]

## Sheet: Suppl-Table3
Suppl-Table 3. TCDD dose response microarray data. Ratios represent expression relative to the time matched vehicle control. P1t-values represent posterior probabilities of activity on a per gene and dose basis using the model-based t-value. Blank values for ratios are due to filtered values during analysis while blank values for t-statistic are due to the absence of expression values or inapprop…
Clone ID	LocusLink Number	GenBank Accession	Gene Name	Gene Abbreviation	Vehicle	Ratio 0.001	Ratio 0.01	Ratio 0.1	Ratio 1	Ratio 10	Ratio 100	Ratio 300		P1t- 0.001	P1t- 0.01	P1t- 0.1	P1t- 1	P1t- 10	P1t- 100	P1t- 300
1		AA466341			1	0.954231	0.87225	0.987723	0.945799	1.06732	1.15207	0.987863		-12195.9	-660.786	-34566.2	-75.4008	-1512.17	-3405.94	-1755.44
2	13030	AA510750	cathepsin B	Ctsb	1	0.970996	0.769138	0.852571	0.820928	1.00248	1.10506	1.15945		-1.76455	0.990437	0.438603	0.634019	-1.36865	-1.3179	0.298708
3	15251	AA511100	hypoxia inducible factor 1, alpha subunit	Hif1a	1	1.03282	0.772771	1.27139	0.95725	1.03809	0.983122	0.950834		-1.06566	0.998862	0.0778972	-0.841812	-1.40634	-0.46424	0.376991
4	17210	AA498218	myeloid cell leukemia sequence 1	Mcl1	1	0.871367	0.811099	1.10511	1.20745	1.01752	0.945953	0.873002		0.536949	0.992557	0.287791	-1.50326	-0.12899	-1.11155	-0.258169
5	66256	AA498292	signal sequence receptor, beta	Ssr2	1	0.960697	0.754856	1.0628	0.801057	1.26838	1.35145	1.53618		-2.39322	0.994153	-3.37237	0.418261	0.999316	0.9985	0.999816
6	14073	AA498162	fatty acid amide hydrolase	Faah	1	0.910703	0.901451	1.12271	1.36038	0.989667	0.841627	0.687581		-0.0649208	-0.0021005	-4.44531	-1.55367	-2.83245	-5.93785	0.926038
7	15945	AA510124	chemokine (C-X-C motif) ligand 10	Cxcl10	1	0.959837	0.9962	1.01863	0.945659	1.31662	1.37467	1.32171		-7.07775	-9.3057	-0.483106	-7.88164	0.999944	0.999987	0.999948
8	17191	AA510881	methyl-CpG binding domain protein 2	Mbd2	1	0.870049	0.903162	1.04978	0.99831	1.23473	1.25252	1.44212		-1.3449	-7.69014	-3.75027	-8.86942	0.999195	0.999948	0.999998
9	21413	AA518455	transcription factor 4	Tcf4	1	0.973246	0.700902	0.911184	0.754064	0.970588	1.27813	1.36886		-6.82708	0.420379	0.996669	0.515049	-28.6778	-8.83384	0.984785
10	17750	AA521728	metallothionein 2	Mt2	1	1.00766	1.00912	1.00899	1.00538	1.00574	0.974879	1.00899		-9786.05	-5417.55	-3590.89	-20.1033	-6650.79	-1941.12	-186.627
11	78330	AA521758	RIKEN cDNA 1500032D16 gene	1500032D16Rik	1	0.902099	0.812134	0.838267	0.847646	0.972893	1.34658	1.35383		0.026804	-1.29638	-0.323294	-16.0968	-16.5097	-3.66748	-1.00136
12	15979	AA541842	interferon gamma receptor	Ifngr	1	0.853993	0.812567	0.75758	0.984211	0.907867	1.09809	1.10493		0.706098	0.904676	0.985161	-6.90928	-5.58118	-3.49153	-2.08424
13	68011	AA530032	small nuclear ribonucleoprotein polypeptide G	Snrpg	1	1.00808	0.962472	0.932505	1.02962	1.20496	1.29401	1.29679		-6.34428	-1.10315	-6.54301	-0.167213	0.99423	0.999399	0.998385
14	17220	AA544948	minichromosome maintenance deficient 7 (S. cerevisiae)	Mcm7	1	0.947045	0.968363	0.844962	0.962932	0.950649	1.11739	1.13616		-3.5322	-3.09797	-2.43782	0.924953	-3.26427	-0.589062	0.352594
15	20823	AA544321	Sjogren syndrome antigen B	Ssb	1	0.8142	0.693437	1.02335	0.926541	0.944156	1.21951	1.06383		0.221158	0.994043	0.985068	-1.97546	-1.50421	-1.18086	-3.11778
16	15388	AA545633	heterogeneous nuclear ribonucleoprotein L	Hnrpl	1	0.967564	0.960648	1.01025	1.12028	1.03193	1.17148	1.03651		-3.19377	-2.27752	-2.00319	0.327777	-2.86055	0.56325	-3.59267
17	20375	AA543251	SFFV proviral integration 1	Sfpi1	1	0.889905	0.879117	0.873011	0.995731	0.99743	1.16854	1.12319		-0.566456	0.97576	0.999372	-1.58677	-3.56186	0.99093	0.982755
18	100563	AA546085	expressed sequence AF013969	AF013969	1	0.934699	0.855979	0.832787	0.895053	1.00699	1.13645	1.12351		-2.02488	0.929544	0.999996	0.109607	-0.30128	0.984021	-0.66889
19	19184	AA546216	protease (prosome, macropain) 26S subunit, ATPase 5	Psmc5	1	0.831984	0.844358	0.925389	0.85989	1.10486	1.11294	1.15879		0.99999	0.905544	0.996627	0.957642	0.880283	0.448454	0.959797
20	21928	AA537672	tumor necrosis factor, alpha-induced protein 2	Tnfaip2	1	0.900245	0.700402	0.821933	0.853654	1.00865	1.42162	1.42705		-1.5296	0.504894	0.999496	-2.0275	-0.334847	0.0682628	0.418516
21	22221	AA537117	upstream binding protein 1	Ubp1	1	0.996984	1.02131	1.00464	1.06703	1.05168	0.987769	0.961612		-1.82205	-0.0475156	-1.63305	0.397911	-0.235291	-2.03183	-1.48279
22	18667	NM_008829	progesterone receptor	Pgr	1	0.950329	0.790407	0.861625	1.02079	1.29916	1.44247	1.39826		-2.03353	0.999974	0.477241	0.936235	1	1	1
23	59050	AA638670	RIKEN cDNA 5730427N09 gene	5730427N09Rik	1	1.08817	1.00491	0.703394	0.894755	0.839256	0.994556	0.939079		0.943791	-1.24881	0.979474	-1.14269	0.998184	0.966575	0.997279
24	19124	AA672430	protein C receptor, endothelial	Procr	1	0.873364	0.85736	0.851399	1.21666	1.1266	0.851724	0.737198		0.723678	0.958733	0.996827	-1.89226	0.458177	-1.21374	-1.48279
25	21408	AA616580	zinc finger protein 354A	Zfp354a	1	1.08106	1.00376	0.933424	0.824217	1.15081	1.06305	1.09333		-1.99297	-2.03678	-1.08876	-0.25164	-0.650785	-1.83284	-1.48279
26	53357	AA592727	phospholipase A2, group VI	Pla2g6	1	0.869601	0.790455	1.04352	1.0066	0.998602	1.02533	1.08712		0.486584	0.924121	-2.03353	-0.334847	-1.36865	0.011363	-1.95659
27		AA793036	vascular endothelial growth factor A	Vegfa	1	0.946057	0.84737	1.07093	0.967452	1.02648	1.05863	1.01994		0.882898	0.954408	-0.403598	-1.46551	-1.11733	-0.76779	0.651586
28	12802	AA796154	cannabinoid receptor 2 (macrophage)	Cnr2	1	0.822891	0.74135	1.09313	1.04206	1.02379	1.01318	1.05102		0.996733	0.993121	0.788425	-1.44786	-0.525167	-1.31981	-1.16682
29	14716	AA619097			1	1.30134	1.06126	0.707514	0.680489	0.548458	0.599489	0.627914		0.825258	-1.14236	0.507692	-0.601435	1	0.999999	1
30	18458	AA615571	poly A binding protein, cytoplasmic 1	Pabpc1	1	0.947604	0.921305	0.987547	1.15424	1.03585	1.08208	1.08384		0.989985	0.956676	-1.01205	0.993699	0.983841	0.976315	0.42614
31	19223	AA616188	prostaglandin I2 (prostacyclin) synthase	Ptgis	1	1.02258	0.937983	0.988677	0.958171	0.986225	1.16736	1.27831		-1.49432	-0.16732	-1.02562	-1.38258	0.729553	0.832666	0.989397
32	14688	AA647753	guanine nucleotide binding protein, beta 1	Gnb1	1	0.944254	1.07803	1.00208	1.02906	1.00754	1.11542	1.13533		0.953235	-0.509918	-0.449046	0.990542	-1.2691	-1.2691	-0.827122
33	18674	AA869051	solute carrier family 25 (mitochondrial carrier; phosphate carrier), member 3	Slc25a3	1	0.87651	0.871291	1.06686	1.07998	0.961188	0.870515	0.77308		0.734917	0.638172	0.490333	0.658147	-0.956715	-0.0688081	-1.10461
34	15251	AA870338	hypoxia inducible factor 1, alpha subunit	Hif1a	1	0.976328	1.04956	1.15746	1.52986	1.51455	1.68095	1.84098		0.695506	-0.138809	0.974329	1	1	1	1
35	22352	AA870527	vimentin	Vim	1	1.12242	0.926826	0.734223	0.903074	0.944357	1.10659	1.15227		-0.0277528	0.0389594	0.770102	-1.10461	-1.52658	0.0125403	-0.0550409
36	27354	AA674908	nibrin	Nbn	1	0.947171	0.799285	0.737838	0.903502	1.00239	0.955688	1.11051		0.745388	0.99736	0.999881	-1.19068	0.177461	0.115977	0.948263
37		AA636829			1	0.969382	0.946606	0.99227	0.989174	1.10776	1.22646	1.02125		0.805523	0.281596	-1.47092	-1.19068	0.0257951	0.999708	-1.51155
38	78142	AA637702	RIKEN cDNA 7330406P05 gene	7330406P05Rik	1	0.938161	0.872382	0.881452	0.997175	1.16197	1.30469	1.27219		0.973634	0.975669	-1.19068	-0.570935	0.51621	1	0.999998
39	14923	AA929137	guanylate kinase 1	Guk1	1	0.937943	0.856553	0.975723	1.05335	1.14713	1.18463	1.18012		0.866996	0.993754	-1.24953	0.990889	0.960232	0.998454	0.932634
40	19166	AA762631	proteasome (prosome, macropain) subunit, alpha type 2	Psma2	1	1.05751	0.97072	0.873818	1.13675	1.08208	1.12188	1.11895		-0.114962	-0.376531	0.709739	0.987887	0.995213	0.803073	-0.451614
41	15569	AA636307	ELAV (embryonic lethal, abnormal vision, Drosophila)-like 2 (Hu antigen B)	Elavl2	1	0.752706	0.71509	0.716484	0.732251	1.14676	1.02566	0.960323		0.994749	0.997469	0.999604	0.999562	-0.422514	-1.97557	-1.17299
42	15395	AA636231	homeo box A10	Hoxa10	1	0.915329	0.730234	0.847447	0.847912	1.04689	1.28775	1.2931		0.184595	0.999287	0.999978	-1.87938	-1.10242	0.954693	0.971831
43	110198	AA636461	aldo-keto reductase family 7, member A5 (aflatoxin aldehyde reductase)	Akr7a5	1	0.870035	0.70828	0.793141	0.81887	1.0945	1.25228	1.27036		-0.616898	0.999941	0.731902	-0.250385	-1.22431	-1.96763	-1.44744
44	54152	AA681606	dynein, axonemal, light chain 4	Dnalc4	1	0.921049	0.857529	0.709737	0.909931	1.04317	1.05498	1.18272		0.717654	0.985532	0.999939	-1.1248	-0.0258082	-4.6284	-3.94487
45		AA656606			1	0.767315	0.815573	1.06935	1.05897	1.10496	0.885494	0.869193		0.975568	0.982742	0.973379	-1.21932	-0.0448181	-1.44881	-1.51659
46	14828	AA693136	heat shock 70kD protein 5 (glucose-regulated protein)	Hspa5	1	0.968103	0.873596	0.806621	0.934705	1.33848	1.37784	1.45221		-1.76097	0.661139	0.595155	0.95209	1	0.999994	1
47		AA693054			1	0.74781	0.69719	0.779671	0.735083	1.07064	1.06652	1.32747		0.999625	0.999694	0.999585	0.92623	-3.52796	-5.46314	0.943578
48	14422	AA823657	UDP-N-acetyl-alpha-D-galactosamine:(N-acetylneuraminyl)-galactosyl-N-acetylglucosaminylpolypeptide-beta-1, 4-N-acetylgalactosaminyltransferase	Galgt2	1	0.902877	0.942829	0.826043	1.09992	1.13353	1.13989	1.20758		0.99908	0.882226	0.999999	0.988594	0.999458	0.999985	0.999714
49	20813	AA691161	signal recognition particle 14	Srp14	1	1.00653	0.963651	1.12022	1.08494	1.22207	1.29586	1.27516		-4.6284	-4.99258	0.92222	-0.972617	0.999458	0.999984	0.999979
50	12323	AA691743	calcium/calmodulin-dependent protein kinase II, beta	Camk2b	1	0.864375	0.845808	0.9128	0.716473	1.01154	0.893081	0.987871		0.998119	0.981163	-2.01545	0.98223	-3.8332	0.736628	-5.32338
51	233575	AA759453	FGF receptor activating protein 1	Frag1	1	1.11234	0.86248	0.864183	0.865114	1.03359	1.10616	0.917165		-5.4879	0.182228	-5.30698	-5.11105	-4.33607	-2.66488	0.197947
52	57312	AA733327	mitochondrial ribosomal protein S31	Mrps31	1	0.943488	0.858085	1.00933	1.10093	1.23639	1.28094	1.13837		0.966609	0.991033	-4.68924	0.993587	0.999339	0.999992	0.984653
53	66043	AA755526	RIKEN cDNA 0610008F14 gene	0610008F14Rik	1	0.889508	0.848881	1.01159	0.848753	1.00425	1.17074	1.19812		-3.64351	0.441925	0.855926	0.924249	-4.43667	-3.4114	0.406123
54		AA645035			1	0.979864	1.01364	1.03033	1.11842	1.20177	1.18815	1.02823		-0.716066	-5.30698	-1.83271	-0.433614	0.748651	0.848575	-5.51974
55	22401	AA710789	wild-type p53-induced gene 1	Wig1	1	0.851334	0.851002	1.23187	1.04022	0.977375	0.848643	0.836627		-0.185396	-0.799061	-3.33326	-1.21932	-1.51659	-1.51659	-1.76097
56		AA712092			1	1.17433	1.05175	0.814232	0.991617	0.880046	0.966391	1.13059		-4.86159	0.453455	0.228665	-2.08979	-3.29408	0.924249	-0.482408
57	78891	AA726689	SCY1-like 1 (S. cerevisiae)	Scyl1	1	0.951205	0.936119	0.998373	0.962345	1.17028	1.24683	1.30567		-1.1248	0.586185	-4.77738	-3.8332	0.612601	0.999986	0.999995
58	21917	AA734516	thymopoietin	Tmpo	1	0.913175	0.855919	1.07115	1.01861	1.08618	1.21232	1.08967		0.999571	0.999476	0.653432	-1.44881	0.999723	0.996447	0.999937
59	14998	AA717747	histocompatibility 2, class II, locus DMa	H2-DMa	1	0.922459	0.854904	0.819646	0.932566	1.13913	1.35318	1.4139		-6.12324	0.777029	0.873284	-9.22406	-3.6099	0.999989	1
60	66144	AA636882	ATPase, H+ transporting, V1 subunit F	Atp6v1f	1	0.851061	0.975258	0.843837	1.06094	1.14013	1.23253	1.1795		0.910472	-6.96275	0.653899	0.0380768	-2.9932	0.980207	-0.401232
61	13798	AA711901	engrailed 1	En1	1	0.996638	0.732166	1.13166	0.940241	0.94701	1.10792	0.985355		-2.5215	0.948487	-5.25155	0.77139	-9.34994	-2.62355	-8.21251
62	11770	AA712099	fatty acid binding protein 4, adipocyte	Fabp4	1	0.965784	0.927945	1.03561	1.11231	1.15536	1.44125	1.2258		-4.81524	-5.25155	-8.07469	0.721471	0.610421	1	0.999995
63		AA739325			1	0.975145	0.652409	0.795623	0.805698	1.0275	1.23256	1.19485		-4.87734	0.999997	0.951314	-5.81363	-9.1493	-0.68845	-9.26951
64	20184	AA739003	retinoid X receptor interacting protein 110	Rxrip110	1	1.08093	0.995981	0.799431	1.04798	1.15828	1.16211	1.16362		-9.22406	-6.42878	0.520009	0.653899	0.508918	0.945508	0.782543
65	22190	AA880165	ubiquitin C	Ubc	1	0.9381	0.889655	0.855133	0.917585	1.12235	1.2568	1.15039		-0.0226964	0.999736	0.999973	-9.35839	-0.983024	0.999997	0.97011
66	16188	AA797533	interleukin 3 receptor, alpha chain	Il3ra	1	0.963771	0.852728	1.02023	0.888146	0.990035	1.15232	1.01023		-2.77964	0.0958604	0.996145	-2.93924	-7.78138	-0.0436354	-1.43144
67		AA880004			1	0.879719	0.932971	0.870869	1.0757	1.28376	1.40303	1.30017		0.879802	-4.08159	-9.03362	0.759726	0.998985	0.999999	0.999915
68	19752	AA790398	ribonuclease, RNase A family, 1 (pancreatic)	Rnase1	1	0.920794	0.783371	0.938201	1.09335	1.09929	1.10184	1.0299		-4.56804	0.995759	0.997377	-0.297599	0.839759	-1.05329	-3.43773
69	18575	AA856411	phosphodiesterase 1C	Pde1c	1	1.13473	0.921839	0.76309	0.901502	0.984494	1.21242	1.09537		-0.914521	-0.483106	-3.21269	-7.19117	-2.08305	-2.93924	-8.92386
70	16477	AA759387	Jun-B oncogene	Junb	1	0.902016	0.858114	0.847268	0.936281	1.03668	0.944019	1.04426		0.424907	0.982953	0.991277	-6.96275	-9.0587	-2.77964	-7.24725
71	14148	AA881439	ferredoxin 1	Fdx1	1	0.971718	1.02134	0.975807	1.04799	1.08274	1.06386	1.07877		-8.98062	-7.35807	-3.6679	0.252256	0.572261	-1.55367	-0.948552
72	75705	AA867136	RIKEN cDNA 2310046H11 gene	2310046H11Rik	1	0.875432	0.838295	0.88871	1.11211	1.10778	1.15564	0.98761		0.398749	-0.0649208	0.994363	-7.88164	-0.200107	-1.3916	0.0181561
73		AA867214			1	0.95938	0.828562	1.06998	0.860517	1.05967	1.16845	1.15995		-8.73179	0.998985	-5.75137	0.759726	-1.05329	0.385294	0.734787
74	12568	AA881868	cyclin-dependent kinase 5	Cdk5	1	1.03598	0.852643	1.06282	0.903466	0.977225	1.09744	1.16113		-8.46869	0.992051	-4.93954	-8.50872	-6.12324	-3.10222	-2.08305
75	71819	AA798124	kinesin family member 23	Kif23	1	0.926059	0.84998	0.817001	0.846271	0.940372	0.954583	1.01463		-3.49481	0.787934	0.572261	0.813123	0.0576654	-3.49481	-2.32238
76	110119	AA915049	mannose phosphate isomerase 1	Mpi1	1	1.0538	0.956361	0.920835	1.03785	0.868528	1.04826	1.143		-10.3026	0.868901	-14.1031	-3.16932	-10.8564	-8.22061	-13.1141
77	12579	AA914666	cyclin-dependent kinase inhibitor 2B (p15, inhibits CDK4)	Cdkn2b	1	0.909096	0.932332	1.16383	1.30218	1.06925	1.12084	1.08925		-15.992	-15.3293	-15.085	-16.483	-4.21949	0.977661	0.962767
78	228836	AA874407	cDNA sequence BC024558	BC024558	1	0.956543	0.890644	0.940698	1.07579	0.921404	1.03308	1.0241		-1.43674	0.961647	-16.1238	0.86151	0.827917	-5.79307	0.293072
79	12122	AA915729	BH3 interacting domain death agonist	Bid	1	1.01382	0.798096	1.00484	0.764683	0.973584	1.07498	1.1999		-16.5902	0.868901	0.885807	0.494111	-6.36883	-7.79538	0.0252666
80	74255	AA939752	RIKEN cDNA 2610203K23 gene	2610203K23Rik	1	0.910328	0.734118	1.15974	1.10306	1.07667	0.914059	0.980434		-13.8148	0.832493	-0.443198	-15.8543	-3.60023	-15.5623	-5.42278
81	234734	AI154346	alanyl-tRNA synthetase	Aars	1	0.900761	0.992002	0.963895	0.916861	1.3299	1.3046	1.34749		0.925127	-13.717	-17.3519	-16.8292	0.999978	0.999986	0.999993
82	19217	AA958901	prostaglandin E receptor 2 (subtype EP2)	Ptger2	1	0.968737	0.762522	0.877758	0.955792	1.20822	1.12616	1.2871		-17.3145	0.293072	-7.48105	-16.4271	-3.90351	-13.8148	-5.06394
83	19293	AA980158	parvalbumin	Pva	1	0.969908	0.735653	0.769386	0.82618	1.04068	1.37367	1.35572		-10.4135	0.993791	0.961647	-2.51493	-17.3594	0.94854	0.990317
84	14705	AA980499	Bernardinelli-Seip congenital lipodystrophy 2 homolog (human)	Bscl2	1	0.864644	0.699901	0.877382	0.940664	0.9377	1.11428	1.3097		0.730294	0.976262	0.998794	-5.98235	-16.5902	-13.3179	0.259259
85	68003	AI049437	RIKEN cDNA 3110001O07 gene	3110001O07Rik	1	1.08847	1.07557	1.01739	1.09916	1.13141	1.07754	1.14843		-19.2983	-5.42946	-20.1793	-8.41	-3.67877	-15.8942	-7.59571
86	15401	AI006119	homeo box A4	Hoxa4	1	0.998913	1.08303	0.993019	1.05571	1.14545	1.14005	1.11261		-27.3521	-0.173556	-27.9134	-5.42946	-6.95197	-4.21729	-18.048
87	16780	AI019837	laminin, beta 3	Lamb3	1	0.908953	0.647196	0.689959	0.68541	0.758589	0.71298	0.788288		-20.873	0.908939	0.605904	0.66353	-1.44113	0.218725	-3.59327
88	19222	AI019668	prostaglandin I receptor (IP)	Ptgir	1	0.945708	1.00901	0.898323	1.05104	0.94728	1.0729	1.06251		-16.252	-27.9134	0.237655	0.138749	-21.0445	-0.929112	-1.93971
89	16590	AI020663	kit oncogene	Kit	1	1.01544	0.867521	0.887375	0.957298	1.22532	1.33325	1.20726		-21.2152	0.900678	0.998555	-26.4453	0.978528	1	0.999462
90	12315	AI020695	calmodulin 3	Calm3	1	0.901431	0.846572	0.996298	0.910458	1.04844	1.25627	1.19974		-0.146418	0.159397	0.199377	-0.545563	-4.40666	0.955224	-3.42584
91		AI120868			1	0.973068	0.962641	0.962407	1.19716	1.43441	1.45009	1.41612		-18.5365	-46.4406	-10.5081	0.988353	1	1	1
92	14425	AI180761	UDP-N-acetyl-alpha-D-galactosamine:polypeptide N-acetylgalactosaminyltransferase 3	Galnt3	1	1.00038	0.999763	0.877067	1.12882	1.14136	1.18389	1.19466		-14.0836	-27.7546	0.346581	-22.6971	-7.56614	0.59628	0.853763
93	66711	AI180905	Shwachman-Bodian-Diamond syndrome homolog (human)	Sbds	1	0.928402	1.00327	0.90869	1.09977	1.22182	1.34729	1.37117		-23.5685	-43.6255	-37.6732	0.877306	0.996781	0.999976	0.999971
94		AI036494			1	1.08211	0.962394	0.830397	0.864639	1.0252	1.06068	1.09462		-42.6937	-17.75	-0.501787	-20.9906	-41.2053	-41.9624	-46.4406
95	12750	AI120656	CDC like kinase 4	Clk4	1	0.927058	0.975332	0.736679	0.872048	0.882468	0.987071	1.02216		-61.8081	-78.1196	0.500914	-83.8329	-0.651426	-2.66913	0.99983
96	11605	AA832920	galactosidase, alpha	Gla	1	0.935613	0.781399	0.814507	0.895665	1.01538	1.33597	1.42331		-66.9988	-22.7459	0.856143	-64.6856	-6.10242	-0.0654517	0.16101
97	268977	AA833086	latent transforming growth factor beta binding protein 1	Ltbp1	1	1.02095	0.781028	0.92962	0.763532	0.928712	1.16416	1.17939		-50.1988	-59.343	-0.0377767	-4.99375	-0.454366	-79.5206	-77.0918
98	14313	AA839542	follistatin	Fst	1	0.937428	0.740445	0.884372	0.875519	0.820834	0.832254	1.14797		-143.678	0.529193	-3.20219	-104.037	-4.72597	-42.8989	-141.344
99	56697	AI286847	A kinase (PRKA) anchor protein 10	Akap10	1	0.958511	0.839544	0.956532	0.806478	1.09553	1.23596	1.1903		-375.195	0.451515	-2.72993	-15.3727	-272.288	0.451515	-27.5706
100	18749	AI159395	protein kinase, cAMP dependent, catalytic, beta	Prkacb	1	0.873009	0.894799	0.920732	0.900122	0.920961	0.893423	0.977781		-1093.48	-1.60124	0.916687	-14.0652	0.480702	-0.536583	0.999997
101	15109	AI154681	histidine ammonia lyase	Hal	1	0.976362	1.03479	0.903046	0.79939	0.717202	0.626604	0.532398		-94.1741	-33.3277	-42.1289	-3.26029	0.999947	1	1
102	20366	AI529008	small EDRK-rich factor 2 pseudogene	Serf2-ps	1	0.943666	1.01472	1.00176	1.12781	1.03745	1.07203	1.01372		-43.3151	-20.4941	-36.9757	0.989726	-45.9991	-17.3873	0.598783
103	217737	AA833239	AHA1, activator of heat shock 90kDa protein ATPase homolog 1 (yeast)	Ahsa1	1	0.976791	0.828631	1.05262	1.06432	1.24233	1.32548	1.11592		-46.2875	0.769397	-25.7772	0.805494	-17.6375	0.982806	-24.0737
104	13424	AA833263	dynein, cytoplasmic, heavy chain 1	Dnchc1	1	0.879706	0.960406	1.00202	1.01151	1.03169	1.04434	1.04124		-9.29946	-28.9379	-38.48	-25.7772	-45.827	-46.4034	-33.4854
105	69019	AA833338	RIKEN cDNA 1810004F21 gene	1810004F21Rik	1	1.0043	0.823071	0.875576	1.11038	1.23736	1.49947	1.33062		-39.2003	0.849836	-46.6093	0.964517	0.552961	1	0.998903
106	101568	AI152017	vaccinia related kinase 3	Vrk3	1	0.921589	1.01729	0.991368	1.01957	0.98298	1.01321	1.09664		-9.29133	-13.0918	-0.136843	-2.6971	-3.51927	-4.45612	-1.98808
107	12912	AI158037	cAMP responsive element binding protein 1	Creb1	1	0.83742	0.791216	0.917352	1.26709	1.03108	1.02747	0.773587		-12.0394	-3.97346	-7.15822	-16.8847	-15.7569	-16.7106	-7.67644
108	12483	AI159351	CD22 antigen	Cd22	1			0.692211	1.05228	0.897662	0.910977	1.01114
109	11911	AI152301	activating transcription factor 4	Atf4	1	0.782033	0.844716	0.857618	1.03446	0.992675	1.03197	1.06016		0.999948	0.401946	0.35768	-5.41265	-16.9971	-17.3165	-17.1491
110	11486	AI152550	adenosine deaminase	Ada	1	0.929267	0.776144	0.895736	0.894561	1.0149	1.24241	1.08759		-0.381061	-12.6772	0.974819	-16.0968	-16.8847	-1.62468	-12.7817
111	12638	AI156185	cystic fibrosis transmembrane conductance regulator homolog	Cftr	1	0.862024	0.70234	0.889501	0.858645	0.993163	1.11363	1.24189		-3.30296	0.110907	0.837214	-17.3277	-4.45612	-15.0596	-10.3955
112	15374	AI573524	hematological and neurological expressed sequence 1	Hn1	1	0.904754	0.93119	1.02248	1.19202	1.21037	1.44712	1.32299		-4.62324	-17.0937	-1.12385	0.993392	0.999879	1	0.999999
113	16601	AI153855	basic transcription element binding protein 1	Bteb1	1	0.819952	0.74461	0.675169	0.961056	1.0915	1.10951	1.12882		-1.93395	0.952935	0.999935	-10.8377	-11.278	-6.95454	-11.6061
114	17105	AI157812	lysozyme	Lyzs	1	0.852142	0.818229	0.999557	1.18445	0.930472	0.848888	0.795732		-0.773433	-1.98808	-0.351919	-9.51129	-8.7451	0.469756	0.999223
115	18260	AI154892	occludin	Ocln	1	0.962607	0.867074	0.856638	1.06489	0.878699	1.057	1.04599		-6.99401	0.999474	0.999922	0.287042	0.994407	-2.04256	-5.19477
116	53599	AI155272	CD164 antigen	Cd164	1	1.24151	0.975109	0.807128	1.15217	0.895241	1.32317	1.11809		0.991896	-5.93548	0.0360032	0.992379	-4.02172	0.922971	-6.99034
117		AA981395			1	1.02447	0.843752	0.548664	1.16973	0.858658	0.963564	1.08979		-6.1499	0.976232	0.998535	0.928954	-2.92488	0.684664	-0.28049
118	12551	AA982462	cadherin 10	Cdh10	1	1.02382	0.883821	0.856613	0.786459	1.01361	1.06311	1.33062		-5.4978	-4.02172	0.384304	-6.59384	-3.06464	-6.66492	-2.25376
119	11964	AI195304	ATPase, H+ transporting, V1 subunit A, isoform 1	Atp6v1a1	1	1.02332	0.81516	0.751192	0.95756	1.10006	1.19098	1.26403		-4.54929	-0.698574	0.492844	-2.9713	-2.83259	-4.92339	-0.0416489
120	59027	AI227311	RIKEN cDNA 1110035O14 gene	1110035O14Rik	1	1.0048	1.00112	1.00356	1.21862	0.963026	0.791393	0.705327		-6.37458	-6.08054	-1.20486	-1.4542	-6.85464	0.555814	0.963446
121	13013	AI037715	cystatin 9	Cst9	1	1.1571	0.732235	0.972615	0.7835	0.976829	1.26875	0.971352		-6.21702	0.992379	0.984712	0.942873	-2.65038	0.795157	0.397251
122	22024	AI046576	cysteine-rich secretory protein 2	Crisp2	1	0.982229	0.714546	1.0769	0.807395	0.90795	1.10065	1.21141		0.645898	0.995364	0.99981	-5.85994	-4.78449	-2.34016	-2.08424
123	20877	AI048384	aurora kinase B	Aurkb	1	0.88575	0.851376	1.14152	1.17848	1.02375	0.801269	0.704601		-0.0416489	0.434734	-5.01487	-3.11155	-4.35861	-1.87879	-3.25314
124	102462	AI173034	RIKEN cDNA 1190002L16 gene	1190002L16Rik	1	0.765749	0.808319	1.09843	1.02504	1.10242	0.990757	1.01575		1	0.996724	-0.234217	-3.5395	0.961319	-5.19477	-4.45418
125	14260	AI173036	formin	Fmn	1	1.0556	0.781185	1.04449	0.819752	0.936684	1.14754	1.03917		-5.32663	0.945934	0.795157	-6.76906	-6.21702	-2.60536	-6.76906
126		AI037693			1	0.900737	0.726947	1.4124	0.983275	1.06396	0.869904	0.876164		-3.58754	0.994407	0.637665	-6.37458	-3.92512	-4.40645	-2.21097
127	20671	AI048425	SRY-box containing gene 17	Sox17	1	0.978244	0.916546	0.813414	1.01359	0.901996	1.19295	1.0403		-6.93189	-6.7497	0.458618	-6.99401	-6.95132	-6.83904	-6.70875
128	11640	AI047078	A kinase (PRKA) anchor protein 1	Akap1	1	0.893032	0.898543	0.930825	0.982689	1.0504	1.05781	1.02223		0.620702	0.584705	-0.103043	-5.97252	-6.85464	-4.8773	-5.19477
129	54137	AI047576	proacrosin binding protein	Acrbp	1	1.04211	0.740479	1.14239	0.942773	0.940856	0.995554	0.993665		-6.18374	0.98901	0.637665	-6.98057	-4.11823	-2.92488	-6.43331
130	15234	AI225823	hepatocyte growth factor	Hgf	1	0.978181	0.817601	0.860814	0.804155	0.916072	1.03972	1.09959		-6.46171	-6.40426	0.959078	-4.21457	-1.2744	0.241651	-3.87682
131	14211	AI255214	SMC2 structural maintenance of chromosomes 2-like 1 (yeast)	Smc2l1	1	0.828807	0.832591	0.948013	0.733087	0.990932	1.2566	1.33202		-6.83904	0.397251	0.751204	-0.352341	-6.46171	-2.16845	-2.92488
132	11609	AI316812	angiotensin II receptor, type 2	Agtr2	1	0.778519	0.858064	0.744885	0.881727	1.1357	0.956785	1.07197		0.470237	-6.99034	0.99993	-4.45418	-4.73779	0.844255	-5.7825
133	13039	AA174215	cathepsin L	Ctsl	1	0.939128	1.01737	0.810769	0.877035	0.884649	0.814858	0.865639		-1.64237	-6.64193	0.999704	0.827783	0.936264	0.99987	0.988326
134	58810	AI605721	aldo-keto reductase family 1, member A4 (aldehyde reductase)	Akr1a4	1	0.991757	0.961852	0.825636	1.18403	1.41023	1.47834	1.48476		-3.3006	-6.28184	0.611965	1	1	1	1
135	20090	W12819	ribosomal protein S29	Rps29	1	0.999964	1.01471	0.928082	1.16315	1.01764	0.94267	0.914836		-6.78769	-6.90928	0.774129	0.986021	-1.41756	-5.23903	-3.11155
136	74617	W10703	RIKEN cDNA 4833411K15 gene	4833411K15Rik	1	0.931428	0.962885	1.02056	1.50713	1.40231	1.34032	1.67098		0.117899	-3.43964	0.714249	1	0.999861	1	1
137	11544	W10726	ADP-ribosylarginine hydrolase	Adprh	1	0.959899	0.883109	0.994864	1.01678	0.88404	1.09724	1.0708		-3.52366	-0.681281	0.776522	-0.13594	0.937398	-0.19212	-3.21192
138	16322	W10710	inhibin alpha	Inha	1	0.948111	0.8338	0.735107	1.17061	1.03903	1.1066	1.15857		0.912543	-0.011885	0.99999	0.56325	-3.41439	-1.12839	0.800712
139		W12178			1	0.917107	0.91824	0.825594	1.08885	0.950554	1.13513	1.12211		0.23514	0.826705	0.999979	0.117899	0.720464	0.977086	0.791324
140	12581	W12208	cyclin-dependent kinase inhibitor 2D (p19, inhibits CDK4)	Cdkn2d	1	0.958997	0.902794	0.991272	0.907445	0.880245	1.15146	1.14746		-3.56186	-0.211247	0.882026	-3.35902	0.19262	0.433888	-0.0638463
141	14451	W13049	growth arrest specific 1	Gas1	1			0.730244	1.27594	2.2592		1.22519
142		W13631			1	1.09307	0.990066	0.846712	0.974207	1.08427	1.14249	1.11876		0.178064	-3.54793	1	-1.15457	-0.849267	0.999992	0.997412
143	17158	W09023	mannosidase 2, alpha 1	Man2a1	1	0.955872	0.809323	0.753959	0.785673	0.893436	0.810988	0.850861		-2.49023	0.990375	0.998391	0.987086	0.98121	0.999894	0.999784
144	20932	W12260	surfeit gene 4	Surf4	1	1.03891	0.984193	0.91674	1.08469	1.10391	1.09705	1.06572		0.895743	-3.22973	-3.60768	0.991705	-0.999409	0.935744	0.526295
145	56334	W14393	RIKEN cDNA 1110032D12 gene	1110032D12Rik	1	0.975037	0.918209	0.978436	1.01379	1.31766	1.19384	1.24406		-2.8835	-3.54029	-3.54029	0.422794	0.999927	0.818391	0.94213
146	51793	W99217	dimethylarginine dimethylaminohydrolase 2	Ddah2	1	0.83927	0.764431	1.08853	0.963247	1.04837	1.21089	1.34504		0.999642	0.998052	0.991454	-3.49539	0.117899	0.999925	0.999999
147		W12121			1	0.965997	0.832772	0.959341	0.911168	1.22903	1.138	1.17852		-2.05853	0.994394	-3.24718	-2.14118	0.869916	0.846045	0.86012
148	18160	W13098	natriuretic peptide receptor 1	Npr1	1	0.818471	0.873044	0.987559	1.11646	1.07869	1.194	1.25087		0.991454	0.873043	-2.49023	0.0866423	-0.566456	0.991454	0.99799
149	20024	W11216	RNA polymerase II transcriptional coactivator	Rpo2tc1	1	1.00944	0.882321	0.865907	1.0088	1.08734	1.23674	1.14012		-3.19377	0.755383	-1.75305	-3.15644	0.884892	0.903269	-0.211247
150		W13691			1	1.01758	1.02478	1.23265	1.40751	1.25006	1.31889	1.17755		-2.92862	-3.29736	0.433888	0.999998	0.999548	1	0.999676
151	11792	W08299	apurinic/apyrimidinic endonuclease 1	Apex1	1	0.935845	0.884351	1.03904	1.13889	1.24635	1.30891	1.19718		0.23514	0.998629	-2.19596	0.999431	0.999999	0.999945	0.980109
152	15902	W08387	inhibitor of DNA binding 2	Idb2	1	0.837227	0.79406	0.680887	1.10661	0.575337	0.978625	0.782969		0.912543	0.652864	0.999898	-2.22323	1	0.714249	0.999351
153	15203	W11571	hephaestin	Heph	1	1.01358	0.929576	1.03187	1.18027	1.19842	1.25944	1.19262		-1.20727	-3.26427	0.400092	0.999995	0.846045	0.998391	0.9671
154		W34460			1	1.02598	1.03469	1.23701	1.27038	1.39404	1.42068	1.44036		-1.15457	-3.21192	0.914732	1	1	1	1
155	66082	W34507	abhydrolase domain containing 6	Abhd6	1	0.960678	0.865291	0.871823	1.10127	0.98703	1.06082	1.15824		-3.60557	0.916872	0.466161	-2.5677	-3.46322	-0.117615	0.327777
156		W14555			1	0.856282	0.775825	0.918919	0.918219	1.10674	1.07025	1.10292		-3.26427	-0.776279	0.985908	-0.776279	-3.52366	-0.589062	-1.83649
157	23833	W15001	CD52 antigen	Cd52	1	0.877168	0.765963	1.0284	0.983884	1.12336	1.09717	1.09261		0.89312	0.376695	0.898308	-3.21192	-3.22973	-0.47788	0.660189
158	56040	W14267	ribosomal protein, large, P1	Rplp1	1	1.04361	1.06209	0.967231	1.09464	1.11203	1.07661	1.09124		-3.17527	-2.51621	-3.60674	0.943633	0.796065	0.0382745	-1.05061
159	12068	W18376	blocked early in transport 1 homolog (S. cerevisiae)	Bet1	1	1.02101	0.847003	0.795701	1.11366	0.994169	1.22792	1.01056		-0.0994912	0.999284	0.999665	0.614233	-3.38751	0.997719	-2.71789
160	27360	W18074	adducin 3 (gamma)	Add3	1	0.889742	0.954778	0.912474	1.13397	1.18353	1.19187	1.20957		0.992186	-0.456206	0.9671	0.997067	0.999284	0.999993	0.999999
161	15399	AI324701	homeo box A2	Hoxa2	1	0.890534	0.855425	0.952222	1.06942	1.0169	1.10387	1.0087		-0.330194	0.932315	0.95443	-0.230574	-2.81392	0.882026	-1.15457
162	68198	AI391300	NADH dehydrogenase (ubiquinone) 1 beta subcomplex, 2	Ndufb2	1	0.953113	1.00507	0.762176	0.909937	0.847098	0.739496	0.830136		-2.4641	-3.60557	0.996974	-1.0764	0.749837	0.999307	0.912543
163	28080	W36942	ATP synthase, H+ transporting, mitochondrial F1 complex, O subunit	Atp5o	1	1.07743	1.01903	0.842884	1.08312	1.0049	1.12221	1.02293		0.0382745	-2.49023	0.967992	0.376695	0.476587	0.19262	-2.43782
164	20016	W20956	RNA polymerase 1-1	Rpo1-1	1	0.841734	0.908275	1.02403	1.14663	0.991265	0.955338	0.999877		0.991454	0.900817	0.999992	0.985068	-1.42222	-3.29736	-1.97546
165		W34262			1	0.863289	0.954212	0.943212	1.00833	0.997198	0.962122	1.05274		-2.76635	-0.211247	0.989482	-2.4641	-2.97268	-3.59267	-0.011885
166	19042	W18642	protein phosphatase 1A, magnesium dependent, alpha isoform	Ppm1a	1	1.00527	1.00338	0.75481	0.869409	0.910423	0.971638	0.965099		-3.34418	-3.58869	1	0.814105	0.221158	-0.65796	-0.589062
167	13542	W29705	dishevelled, dsh homolog 1 (Drosophila)	Dvl1	1	0.937221	1.04995	0.973818	1.13503	1.00305	1.11397	1.05124		0.0545955	-3.60768	0.849676	-1.0764	-1.83649	-3.24718	0.364733
168		W30430			1	1.08649	1.10679	1.02347	1.17182	1.21721	1.34198	1.32976		-0.371422	0.999717	-1.72527	0.999412	0.998172	0.999999	0.999932
169	14751	W29397	glucose phosphate isomerase 1	Gpi1	1	0.917132	0.899268	1.15394	0.970504	1.10363	0.97148	1.06486		-0.250101	-0.873914	0.23514	-3.11778	-1.6144	-2.43782	-2.76635
170	27053	W29492	asparagine synthetase	Asns	1	0.830229	0.762179	1.21751	1.013	1.09406	1.22011	1.34661		0.935744	0.996572	0.364733	-2.27752	-0.250101	0.884892	0.999676
171	53323	W29921	huntingtin interacting protein 2	Hip2	1	0.926975	0.86175	1.04583	1.02466	1.37802	1.51122	1.26504		-0.186861	0.991487	0.885763	0.9831	0.999999	1	1
172	16619	W34620	kallikrein 27	Klk27	1	0.95013	0.881985	0.94802	1.00035	0.966076	1.0951	0.998599		0.8493	0.971532	0.997669	0.53143	-2.02488	0.86244	-1.71446
173	13167	W33910	diazepam binding inhibitor	Dbi	1	1.0585	1.05131	1.06614	1.0884	1.08314	1.03737	0.985499		-1.90998	-1.91844	-0.943134	0.957642	0.981109	0.53143	-1.91844
174	385608	AI430677	similar to 40S ribosomal protein S10	na	1	0.899474	0.978851	1.04436	1.23045	1.31504	1.28116	1.30513		0.971532	-1.96338	-1.05256	1	0.999933	0.999153	0.999962
175	56443	W34547	actin related protein 2/3 complex, subunit 1A	Arpc1a	1	0.986826	0.829527	1.02095	0.994956	1.19247	1.39969	1.26113		0.011363	0.997362	-1.43466	0.596884	0.998448	1	0.999831
176	14325	W34689	ferritin light chain 1	Ftl1	1	0.997806	0.999588	0.99244	1.00152	0.999404	0.998968	1.00486		-1.90998	-2.00275	0.771167	0.968309	-1.7014	-0.334847	0.905544
177	22784	W34988	solute carrier family 30 (zinc transporter), member 3	Slc30a3	1	1.00471	1.04769	1.02599	1.05283	1.01599	1.09057	1.05164		-0.139395	0.717934	0.589115	0.998398	-1.84338	-0.49008	-0.30128
178	22378	W41126	WW domain binding protein 2	Wbp2	1	1.03449	0.880114	0.957716	1.10785	0.948862	0.898578	0.957456		-2.01872	0.999731	0.998066	0.994021	-1.77652	0.859252	0.706153
179	107686	W41213	small nuclear ribonucleoprotein D2	Snrpd2	1	1.03735	1.08118	1.1118	0.986812	1.15605	1.27037	1.39913		-1.90126	-1.36865	0.604538	0.966575	0.999917	1	1
180	22174	W41438	TYRO3 protein tyrosine kinase 3	Tyro3	1	1.00863	1.02915	1.09038	1.10831	1.13216	1.22698	1.27359		-0.318018	-2.0072	-1.98764	0.999983	0.999794	0.999999	0.999937
181	12812	W40627	coilin	Coil	1	0.788388	0.794725	1.01214	0.98043	1.03359	1.10864	1.28675		0.883051	0.842333	-2.01872	-1.94952	-1.48279	-0.543139	0.925969
182	15425	W33293	homeo box C6	Hoxc6	1	0.76602	0.838162	0.744151	1.25465	1.10285	1.25397	1.35335		0.964754	0.8493	0.999302	0.967453	0.975135	0.9831	0.992202
183	16158	W41820	interleukin 11 receptor, alpha chain 2	Il11ra2	1	0.963685	0.890473	0.986819	1.00631	1.08301	1.22441	1.14214		-1.96338	0.149791	0.604538	0.0682628	-0.351767	0.996523	-0.0178328
184		W48168			1	0.94037	0.876201	0.961713	1.19206	1.33634	1.45407	1.44796		-0.869822	0.991732	0.980033	1	1	1	1
185	19730	W48230	ral guanine nucleotide dissociation stimulator	Ralgds	1	0.987616	0.977436	1.17666	1.15657	1.16431	1.41533	1.18103		-2.03725	-2.03725	-1.46689	0.999981	0.997669	1	0.997942
186	26559	W41683	hormonally upregulated Neu-associated kinase	Hunk	1	0.955841	0.832482	0.893993	0.789403	0.850366	0.982229	1.02726		0.999302	-0.437632	0.999908	-1.21374	0.815729	0.648091	-0.543139
187	66913	W46090	KDEL (Lys-Asp-Glu-Leu) endoplasmic reticulum protein retention receptor 2	Kdelr2	1	0.956109	0.939558	0.897215	0.981979	0.979604	1.09507	0.977006		0.874574	0.998716	0.999998	0.859252	-1.21374	0.766251	-0.49008
188	66420	W45751	polymerase (RNA) II (DNA directed) polypeptide E	Polr2e	1	0.926781	0.930379	1.07412	1.10212	1.07763	1.00779	1.08291		0.745701	0.428624	0.955382	0.990437	0.548509	0.771167	0.988954
189	69955	W45807	RIKEN cDNA 2810431B21 gene	2810431B21Rik	1	0.977878	0.96399	1.02668	0.981698	1.05223	1.07451	1.06917		-0.851484	-1.85366	0.918327	-1.10679	-1.08876	0.589115	0.865565
190	18582	W45989	phosphodiesterase 6D, cGMP-specific, rod, delta	Pde6d	1	1.03257	0.913008	0.699778	1.01307	0.907272	1.22547	1.12721		-1.16055	0.109607	1	0.8493	0.149791	0.991732	-1.48279
191	20692	W46030	secreted acidic cysteine rich glycoprotein	Sparc	1	1.0823	1.16219	1.00633	1.11172	1.13742	1.25803	1.3269		0.467772	0.871631	-1.54489	0.916309	0.387414	0.996923	0.991235
192	21652	AI425579	PHD finger protein 1	Phf1	1	0.849409	0.869077	1.0646	0.881369	0.952869	0.9615	1.03511		0.58123	-0.0326139	0.883051	0.929544	0.387414	-0.88816	-0.0776768
193	21428	W61621	transcription factor-like 4	Tcfl4	1	0.872589	0.828152	1.06142	0.884961	1.09865	1.1102	1.04715		0.989868	0.998905	0.275211	0.604538	0.626817	-1.72731	-1.96988
194	20525	W62486	solute carrier family 2 (facilitated glucose transporter), member 1	Slc2a1	1	0.931291	0.835167	1.14117	0.962693	1.00547	1.2718	1.23833		-0.385866	0.310258	-1.63305	-1.76455	-1.90998	0.842333	0.990711
195	13353	W54234	DiGeorge syndrome critical region gene 6	Dgcr6	1	1.06385	1.01093	1.00581	0.996949	1.16892	1.20481	1.02047		-1.17835	-1.16055	-1.66098	-1.48279	0.871631	0.997442	-0.17093
196	15193	W53883	hepatoma-derived growth factor, related protein 2	Hdgfrp2	1	0.917473	0.791485	1.09878	1.0371	1.01081	1.01978	0.955886		0.565107	0.999255	0.794464	-1.94217	-0.741657	-0.869822	0.827566
197	21402	W53991	S-phase kinase-associated protein 1A	Skp1a	1	1.07613	1.06848	0.927582	1.02958	1.29145	1.34271	1.21663		0.162925	-1.30077	-2.03183	-0.906494	0.999957	0.999991	0.999961
198		W61383			1	0.883406	0.815175	1.02644	0.99502	1.06122	1.09478	0.995956		0.998833	0.999871	0.634019	-0.49008	0.648091	0.893572	-2.03601
199	14608	W62391	G protein-coupled receptor 83	Gpr83	1	0.97884	0.785278	0.993653	0.867855	0.992734	1.23984	1.32763		-1.40191	0.9203	-0.979712	-2.00275	-1.07068	0.973747	0.408278
200	14287	W59651	folylpolyglutamyl synthetase	Fpgs	1	0.980082	0.990376	0.99629	1.15092	1.17489	1.23372	1.23307		0.712093	-0.219044	-1.10679	0.99774	0.996415	0.994532	0.972289
201	23994	W64075	DAZ associated protein 2	Dazap2	1	0.870143	1.05847	0.959982	0.94739	1.21944	1.18345	1.14282		0.945202	-1.45084	-2.03492	-0.851484	0.924121	0.827566	0.978312
202	15181	W62765	histone deacetylase 1	Hdac1	1	0.868609	0.882835	0.949043	1.00438	1.13684	1.17767	1.29955		0.99918	0.961852	0.803207	0.803207	0.999599	0.972289	0.999988
203	18472	W61996	platelet-activating factor acetylhydrolase, isoform 1b, beta1 subunit	Pafah1b1	1	0.955038	0.76545	0.874753	0.881254	1.09421	1.22251	1.25713		0.438603	0.999125	0.997016	0.648091	0.149791	0.992427	0.999572
204		W62708			1	0.823717	0.823408	1.01741	0.925626	1.02089	1.16761	1.31411		0.996627	0.883051	0.957642	-1.54489	-0.75992	-0.507702	0.996729
205	68398	W70782			1	0.990966	0.725185	0.944263	0.916229	0.871201	1.29859	1.21525		0.712093	0.959797	0.975803	-0.70521	-0.596734	0.745701	0.275211
206	15427	W64848	homeo box C9	Hoxc9	1	0.942676	1.00718	0.948206	1.10098	1.1443	1.16066	1.16486		-0.219044	0.604538	-1.91844	-0.123794	0.845851	0.64111	0.495801
207	17136	W76964	myelin-associated glycoprotein	Mag	1	0.897623	0.774411	0.93275	0.977329	0.968467	1.01512	0.909936		0.996729	0.999989	0.999999	-1.92663	-0.49008	-1.79976	0.999682
208	66416	W64426	NADH dehydrogenase (ubiquinone) 1 alpha subcomplex, 7 (B14.5a)	Ndufa7	1	1.05023	1.05809	0.794079	1.05953	1.09721	1.06762	1.04777		-2.03353	-1.5296	0.996627	-1.33492	-0.49008	0.0257757	-1.90998
209	14252	W66775	flotillin 2	Flot2	1	0.860633	0.899035	0.865837	1.00064	1.05475	1.10407	0.998572		0.998126	0.992646	0.999826	0.771167	-1.16055	0.835092	-0.796506
210	19725	W70909	regulatory factor X, 2 (influences HLA class II expression)	Rfx2	1	0.91893	0.847664	0.989079	1.01871	1.07306	1.24867	1.16963		0.740336	0.64111	0.961852	0.970756	0.835092	0.999153	0.998795
211		W70994			1	0.93515	1.00976	0.905684	1.0902	1.17938	1.10197	1.11328		-0.108307	-1.35184	0.397911	0.916309	0.975803	-0.155107	-0.268089
212	13057	W74825	cytochrome b-245, alpha polypeptide	Cyba	1	0.894332	0.809645	1.07384	1.05723	1.11713	1.0959	0.965267		0.438603	0.548509	0.961852	-0.525389	0.989267	-0.778204	-1.66098
213	54006	W71604	deformed epidermal autoregulatory factor 1 (Drosophila)	Deaf1	1	0.846104	0.860208	0.897616	0.96226	1.12027	1.21797	1.22487		0.766251	0.775995	0.996827	-1.94217	0.893572	0.996304	0.975803
214	23850	W81981	cellular repressor of E1A-stimulated genes	Creg	1	1.11141	0.989758	0.843397	1.08901	1.30759	1.3504	1.39919		-2.03678	-0.961433	-1.75236	1	1	1	1
215	14131	W82159	Fc receptor, IgG, low affinity III	Fcgr3	1	0.839584	0.83906	1.0913	0.981916	1.15984	1.18192	1.19039		0.984021	0.188801	0.0400638	-1.98201	0.668387	0.924121	0.996304
216	57423	W82194	ATP synthase, H+ transporting, mitochondrial F0 complex, subunit f, isoform 2	Atp5j2	1	0.987063	1.00221	0.841215	1.04465	1.06703	1.05687	1.09811		-0.268089	-1.16055	0.984021	-0.139395	0.355137	0.448454	-1.0162
217	81489	W75670	DnaJ (Hsp40) homolog, subfamily B, member 1	Dnajb1	1	0.892811	0.889692	1.08864	1.03651	1.09737	1.05278	1.0211		0.932964	0.9831	-0.979712	0.428624	0.975803	-1.23132	-2.03353
218	26362	W78330	AXL receptor tyrosine kinase	Axl	1	0.965121	0.892533	1.18203	0.860177	0.909144	1.16423	1.07691		-0.403042	0.0400638	-0.578814	-1.79976	0.477241	0.123131	0.448454
219	74173	W82973	RIKEN cDNA 1700012B15 gene	1700012B15Rik	1	0.819063	0.799586	1.35021	1.10086	1.03591	0.897863	0.786467		0.654964	0.981109	-1.45084	-0.979712	-1.57497	-1.90998	-0.318018
220	26431	W80023	G protein-coupled receptor kinase-interactor 2	Git2	1	0.860445	0.740662	0.933399	0.955729	0.978026	0.999805	1.01954		0.982622	0.999999	0.993067	0.67494	-0.062537	-1.60437	-1.51415
221	13010	W78651	cystatin C	Cst3	1	1.00338	0.980643	1.12331	1.10953	1.15578	1.09517	1.07192		-1.78825	-1.60437	0.798876	0.939361	0.98213	0.565107	0.428624
222	17955	W81759	nucleosome assembly protein 1-like 4	Nap1l4	1	0.944105	0.856252	1.02819	1.10911	1.09409	1.11727	1.10063		0.996729	0.980033	-1.99297	0.998496	0.992859	0.950529	0.0959538
223	109979	W82798	ADP-ribosyltransferase 3	Art3	1	0.925039	0.764373	1.06851	0.815291	0.99365	1.21606	1.39091		-1.96988	0.927776	0.98651	-0.268089	-1.43466	0.565107	0.959797
224	15312	W83341	high mobility group nucleosomal binding domain 1	Hmgn1	1	0.911188	0.933704	0.919571	1.15278	1.19742	1.22832	1.38171		-0.385866	-0.0776768	-0.70521	0.997669	0.999682	0.999125	0.999985
225	105988	W83574	extra spindle poles-like 1 (S. cerevisiae)	Espl1	1	0.955323	0.917863	0.965737	0.898198	1.13297	1.16929	1.20038		0.486584	0.397911	-1.3179	0.648091	0.756156	0.997669	0.997877
226	54405	W83104	NADH dehydrogenase (ubiquinone) 1 alpha subcomplex, 1	Ndufa1	1	0.949306	0.939032	0.828112	1.0031	1.11028	1.10013	1.09753		0.0821722	0.88842	0.96381	-0.650785	0.589115	-1.10679	-0.560948
227	20778	W82738	scavenger receptor class B, member 1	Scarb1	1	0.869667	0.939392	0.82424	0.816551	1.02102	1.05464	1.12702		0.634019	-0.17093	0.940871	0.687732	-1.40191	-2.03492	-1.28355
228	67264	W83085	NADH dehydrogenase (ubiquinone) 1 beta subcomplex 8	Ndufb8	1	0.898394	0.955061	0.855756	1.08201	1.13979	1.0543	1.10134		0.486584	0.0821722	0.989267	0.798876	0.21415	-0.650785	0.332962
229	12257	W82946	benzodiazepine receptor, peripheral	Bzrp	1	0.903748	0.965669	1.06478	1.1936	1.07804	0.99275	0.704405		0.495801	0.0542265	-1.8637	-0.66889	0.729326	-1.96988	0.96996
230	26572	W83216	COP9 (constitutive photomorphogenic) homolog, subunit 3 (Arabidopsis thaliana)	Cops3	1	1.09083	1.0979	0.969867	1.16152	0.998358	0.885978	0.763594		-0.0326139	-2.01518	-1.58976	0.96996	-1.79976	-2.03725	0.9831
231	14419	W83304	galanin	Gal	1	0.797154	0.723269	1.01284	1.16138	1.14775	1.01047	0.811065		0.238972	0.981626	0.983567	-1.61881	0.0257757	-1.96988	0.924121
232	14230	W84142	FK506 binding protein 10	Fkbp10	1	0.719253	1.05114	0.953997	1.28422	1.13534	1.30005	1.22184		0.947927	-1.95659	-1.81103	0.997669	0.924121	0.999807	0.994366
233	15437	AI430412	homeo box D8	Hoxd8	1	0.71039	0.827902	0.979195	0.780781	1.01653	1.22943	1.19279		0.978312	0.966575	0.880283	0.619504	-1.17835	0.972289	-1.84338
234	13136	W83988	decay accelerating factor 1	Daf1	1	0.954713	0.750313	0.88888	0.987446	1.05491	1.18387	1.15061		-1.95659	0.998294	0.999794	-1.96338	-1.90998	0.681388	0.418516
235	16391	W84302	interferon dependent positive acting transcription factor 3 gamma	Isgf3g	1	0.8713	0.827312	0.800773	0.985722	1.10038	1.18685	1.10406		0.991732	0.999739	0.993067	-2.01872	0.366027	0.275211	0.654964
236		W87045			1	0.915155	0.740134	0.865155	0.952117	1.16016	1.39011	1.3565		-1.82205	0.993465	0.999895	0.766251	0.936235	0.999952	0.994532
237	56612	W88132	prefoldin 5	Pfdn5	1	0.888016	0.921767	0.958168	1.02448	1.2026	1.11423	1.14722		0.997442	0.717934	0.775995	-1.46689	0.997669	0.980578	0.989267
238	20643	W85296	small nuclear ribonucleoprotein E	Snrpe	1	0.906226	0.830742	1.03121	1.22003	1.11847	0.92993	0.872495		-0.596734	0.973027	0.9203	-0.318018	0.947927	-1.91844	-1.93454
239	30926	W85535	thioredoxin-like 2	Txnl2	1	0.886456	0.892307	0.930111	1.12437	1.21055	1.19828	1.27837		0.775995	0.859252	0.907791	0.99998	0.999945	0.999625	0.999939
240	17000	W89254	lymphotoxin B receptor	Ltbr	1	0.856062	0.9291	0.966241	1.09296	1.04319	0.893479	0.85594		0.951785	0.448454	0.99824	-0.2029	-0.123794	0.984464	0.999966
241	13043	W96939	cortactin	Cttn	1	0.971764	0.945094	1.03887	1.07188	1.18458	1.21762	1.18912		-1.92663	-2.0072	0.467772	-2.03492	0.999831	0.980578	0.939361
242	56717	AI325857	FK506 binding protein 12-rapamycin associated protein 1	Frap1	1	0.873942	0.911932	1.08763	0.905092	0.955717	1.05338	1.16155		0.995828	0.951785	0.366027	-0.75992	-0.75992	-1.60437	0.877457
243	18541	W89405	pericentrin 2	Pcnt2	1	1.10683	0.7726	0.978887	0.853268	0.935507	1.12198	0.964112		-0.869822	0.973747	-1.98201	-1.99297	-0.437632	-0.25164	0.522707
244	11520	W89846	adipose differentiation related protein	Adfp	1	1.14502	0.946192	0.782529	0.815392	0.935653	1.10208	1.18797		-0.961433	-0.0929338	0.907791	0.9203	-0.741657	-0.0326139	0.332962
245	54364	W89823	ribonuclease P2	Rnasep2	1	0.971483	0.758623	1.37967	0.973832	1.02715	1.02706	1.02913		-1.67465	0.999764	-0.385866	0.831365	0.852683	0.604538	0.798876
246	12297	W90827	calcium channel, voltage-dependent, beta 3 subunit	Cacnb3	1	0.884074	0.894332	1.04686	1.05692	1.07515	1.16006	1.10187		0.987962	0.831365	-1.66098	0.819749	0.761248	0.97445	0.905544
247	21807	W96821	transforming growth factor beta 1 induced transcript 4	Tgfb1i4	1	1.11219	0.814517	1.28803	1.32277	1.23869	1.4961	1.17132		0.355137	0.957642	0.970756	0.998795	0.987614	0.999994	0.789972
248	66596	W99934	general transcription factor III A	Gtf3a	1	0.922069	0.965061	0.953972	1.02133	1.18277	1.11946	1.21232		0.950529	-0.596734	-1.26622	0.924121	0.986122	0.789972	0.981626
249	15417	W97853	homeo box B9	Hoxb9	1	0.98104	0.781965	1.05489	0.834608	0.958962	1.18321	1.31386		-0.507702	-0.351767	-0.0929338	-1.30077	-1.16055	0.842333	0.929544
250	12015	W98547	Bcl-associated death promoter	Bad	1	0.809962	0.883642	0.979045	0.936437	1.02645	0.990058	1.08661		0.999989	0.883051	0.989868	-0.66889	-0.961433	-0.796506	0.477241
251	22419	W91468	wingless-related MMTV integration site 5B	Wnt5b	1	1.2886	0.91356	0.805982	0.918188	1.04271	1.2753	1.25744		0.954211	0.648091	-1.40191	-0.334847	-0.284637	0.988302	-0.155107
252	18971	W91387	polymerase (DNA directed), delta 1, catalytic subunit	Pold1	1	0.839155	0.959273	0.963792	1.04726	1.10594	1.11768	1.20339		0.993465	0.0400638	0.955382	0.90325	-0.385866	0.932964	0.868629
253	11765	AA002389	adaptor protein complex AP-1, gamma 1 subunit	Ap1g1	1	0.978235	0.816799	1.00692	1.03527	1.03107	1.26076	1.07983		-1.99297	0.9789	-2.03353	-1.8637	-1.35184	0.99752	-2.00275
254	18673	AA000102	prohibitin	Phb	1	1.0273	0.976338	1.06067	1.14576	1.13172	1.18653	1.03891		-0.560948	-1.78825	-1.72731	0.995001	0.548509	0.999887	0.994693
255	140858	AA000181	WD repeat domain 5	Wdr5	1	0.853354	0.751788	0.799015	0.935547	1.00313	1.16493	1.10801		0.984464	0.999787	0.999991	0.717934	-1.92663	-0.268089	-2.03492
256	20020	AA000244	polymerase (RNA) II (DNA directed) polypeptide A	Polr2a	1	0.999707	0.885391	0.841008	0.988014	1.04861	1.21191	1.19233		-0.455042	0.668387	0.957642	-1.68813	-1.92663	0.981626	0.936235
257	11465	AA000327	actin, gamma, cytoplasmic	Actg	1	0.825703	0.82191	0.739545	1.02169	0.985938	0.904731	0.926082		0.955382	0.973027	0.975135	-1.07068	-1.63305	0.344115	-0.961433
258	18632	AA003271	peroxisomal biogenesis factor 11b	Pex11b	1	0.960068	0.879872	0.943783	1.03797	1.09782	1.16304	1.18687		0.893572	0.477241	0.877457	-0.268089	0.893572	0.984895	0.999543
259		AA051014			1	0.77401	0.707836	0.989792	0.961565	1.02103	1.09144	1.01163		0.999958	0.999125	0.994849	0.175929	-1.43466	-1.07068	-2.03601
260	17865	AA003042	myeloblastosis oncogene-like 2	Mybl2	1	0.896096	0.737393	0.887394	0.846309	1.00998	1.32821	1.33522		0.712093	0.953012	0.998939	-0.88816	0.604538	-1.90998	0.997107
261	19255	AA003599	protein tyrosine phosphatase, non-receptor type 2	Ptpn2	1	0.795409	0.726093	0.851174	0.873635	1.18281	1.20365	1.28055		0.999625	1	1	-2.00275	0.986888	0.852683	0.961852
262	245474	AA008051	similar to DYSKERIN	na	1	0.930019	0.65713	0.910303	1.01634	1.08567	1.10923	1.13211		-1.64711	0.999976	0.990711	-1.8637	0.957642	-0.507702	-0.0475156
263	15893	AA008044	islet cell autoantigen 1	Ica1	1	0.820109	0.713281	1.07882	0.94269	1.06096	1.11546	1.26783		0.9957	0.99996	1	0.0542265	0.972289	0.740336	0.992202
264	56455	AA008134	dynein, cytoplasmic, light chain 1	Dnclc1	1	0.782083	0.81456	1.06831	1.42113	1.6685	2.03925	2.12793		0.990156	0.880283	-1.67465	0.999973	1	1	1
265	22210	AA003956	ubiquitin-conjugating enzyme E2B, RAD6 homology (S. cerevisiae)	Ube2b	1	1.02359	0.86524	1.04121	0.773886	0.999309	1.02269	0.957638		-1.85366	0.88842	-2.03353	0.998833	-0.632722	-1.26622	0.344115
266	20744	AA014532	spermatid perinuclear RNA binding protein	Spnr	1	0.964497	0.76936	1.07113	0.865928	0.950841	1.10311	1.12593		0.634019	1	-1.58976	0.991235	0.310258	-1.75236	0.962843
267	21645	AA008471	t-complex-associated testis expressed 1	Tcte1	1	1.01692	0.737639	1.03556	0.801526	0.92687	1.28449	1.18295		-1.49854	0.99781	0.495801	0.988632	0.251184	0.916309	0.717934
268	85305	AA004176	lysyl-tRNA synthetase	Kars	1	1.05005	0.877326	1.08976	1.11487	1.17976	1.17895	1.11315		-0.139395	0.924121	-0.186861	0.995293	0.998756	0.999572	0.971532
269	18991	AA014507	POU domain, class 3, transcription factor 1	Pou3f1	1	1.0495	0.938342	1.08116	1.0197	1.05458	1.10575	1.00105		-0.66889	-0.351767	0.408278	-1.72731	-1.45084	0.766251	-1.57497
270	18762	AA014771	protein kinase C, zeta	Prkcz	1	1.02655	0.985589	0.972844	1.00514	0.876678	0.947586	0.944182		-0.210584	-0.0965808	0.165367	0.677252	0.946948	-1.33875	-0.388504
271	14645	AA011759	glutamate-ammonia ligase (glutamine synthase)	Glul	1	0.917545	1.09406	0.938651	0.873797	1.01027	0.985584	0.936907		0.724101	0.565069	-1.20238	-1.27961	-1.16682	-1.15466	0.80136
272	20115	AA014823	ribosomal protein S7	Rps7	1	0.918154	0.986639	1.02042	1.191	1.23926	1.2007	1.28739		-0.647106	-1.07877	-0.692601	0.880193	0.843279	0.644928	0.770102
273	110809	AA013943	splicing factor, arginine/serine-rich 1 (ASF/SF2)	Sfrs1	1	0.919306	0.97749	1.00177	0.952693	1.22767	1.3978	1.42257		0.936869	-0.138809	-1.27961	-1.41382	0.999999	1	1
274	71904	AA015365	RIKEN cDNA 2310021M12 gene	2310021M12Rik	1	0.850268	0.879239	1.06829	1.00345	1.18335	0.998218	1.03136		0.999977	0.695506	0.335688	0.396981	0.997937	-1.37423	-1.31004
275	67782	AA015478			1	0.839947	0.763412	0.982081	1.43215	1.1269	0.839492	0.707986		0.971443	0.975669	0.99157	-0.722789	-0.196099	-1.49827	-0.707711
276	12424	AA016824	cholecystokinin	Cck	1	0.806321	0.882966	0.877629	1.03635	0.984807	1.11423	0.992016		0.998998	0.68343	0.998788	-0.601435	-1.12991	-0.601435	0.689515
277	16832	AA017955	lactate dehydrogenase 2, B chain	Ldh2	1	0.959778	0.787596	1.13137	1.0623	1.00265	1.03853	0.906923		0.950806	0.999995	0.760463	-0.343422	0.992493	0.970676	0.718561
278	19988	AA014108	ribosomal protein L6	Rpl6	1	1.03504	1.05774	1.07618	1.11103	1.27156	1.32124	1.13564		0.868823	-1.51668	0.774801	0.994399	0.999959	1	0.999994
279	15526	AA014915	heat shock protein, A	Hspa9a	1	1.06941	0.884992	0.862066	1.04534	1.13349	1.15979	1.09431		-0.509918	0.950806	0.961904	-0.313561	0.950806	0.948263	-0.449046
280		AA015216			1	0.988208	0.781244	0.944556	0.869943	1.08642	1.40232	1.29868		-0.94264	0.966552	0.877433	0.292632	0.846688	0.999339	0.999059
281	53611	AA016379	vesicle transport through interaction with t-SNAREs homolog 1A (yeast)	Vti1a	1	0.938636	0.849428	0.893739	1.09125	1.11612	1.1308	1.06816		-1.25841	0.638172	0.999997	-1.30008	0.998581	0.999959	0.20134
282	17219	AA016759	minichromosome maintenance deficient 6 (MIS5 homolog, S. pombe) (S. cerevisiae)	Mcm6	1	0.997387	0.90694	1.20671	1.00651	1.14419	1.11483	1.25522		-1.42812	-1.17883	-0.479452	-1.12991	0.68343	0.994875	0.999419
283	17776	AA016762	microtubule associated testis specific serine/threonine protein kinase	Mtssk	1	0.892844	0.812871	1.09613	1.00128	1.17348	1.14	1.09793		0.68343	0.996925	0.981956	0.921414	0.998709	0.98594	0.904956
284	15184	AA017742	histone deacetylase 5	Hdac5	1	1.11574	1.06131	0.948664	0.966665	1.13971	1.13121	1.10571		0.43564	0.81363	0.376991	0.707215	0.695506	0.81363	0.712933
285		AA023906			1	0.869924	0.789268	1.0111	1.04329	1.212	1.36443	1.4556		0.919505	0.707215	0.610153	0.990267	0.999948	1	1
286	22359	AA020307	very low density lipoprotein receptor	Vldlr	1	1.07449	0.832546	0.876854	0.998887	1.55414	1.67047	1.92934		-0.570935	0.30356	0.651586	-0.540421	0.999993	0.999998	1
287		AA023082			1	1.07708	1.02478	1.04009	1.15591	1.06474	0.99765	0.970098		0.967417	0.140873	-0.298697	0.999797	-0.570935	0.052032	0.8907
288	22286	AA023614	undifferentiated embryonic cell transcription factor 1	Utf1	1	0.964572	0.972925	0.995636	1.19238	1.0477	1.1722	1.26863		-0.0277528	-1.52503	0.052032	0.999953	0.30356	0.907166	0.998932
289	16453	AA023670	Janus kinase 3	Jak3	1	0.808396	0.838516	0.837426	0.846155	1.13382	1.20203	1.24334		1	0.999581	0.978742	0.998709	0.999957	0.999913	0.999029
290	20364	AA023745	selenoprotein W, muscle 1	Sepw1	1	0.932299	0.958676	1.07675	1.06269	1.16039	1.1913	1.12431		0.595537	-0.94264	-1.52388	0.760463	0.900396	0.992271	0.915563
291	12916	AA030254	cAMP responsive element modulator	Crem	1	0.999029	0.868833	0.859604	0.913684	1.05949	1.20208	1.09698		-1.42108	0.898045	0.999456	-0.782702	-1.49013	0.998825	0.236374
292	22218	AA030059	ubiquitin-like 1	Ubl1	1	0.786458	0.807326	0.928586	0.945572	1.09225	1.15882	1.18158		1	1	0.99976	-1.48101	-0.358413	0.945603	0.963829
293	12144	AA030433	Bloom syndrome homolog (human)	Blm	1	1.05782	0.760513	0.975009	0.916736	0.976167	1.31971	1.26019		-1.06566	0.984713	0.917555	-0.210584	-1.50197	0.995841	0.93991
294		AA032512			1	0.853162	0.941068	0.963662	1.12708	1.13656	1.19091	1.01937		0.993882	0.36683	-1.31004	0.993699	0.36683	0.995715	-0.570935
295	320499	AA027367			1	1.0704	0.862291	1.16357	0.967748	0.948945	0.989175	1.03037		-0.0413552	0.979868	-1.14236	0.396981	-1.2691	-1.41382	-0.525167
296	12464	AA027583	chaperonin subunit 4 (delta)	Cct4	1	1.04971	0.909932	0.849278	1.19233	0.960312	0.947225	0.893147		-0.827122	-0.0550409	0.865839	0.877433	-1.25841	0.0389594	0.836269
297	20085	AA030284	ribosomal protein S19	Rps19	1	0.976136	0.908196	1.01457	1.293	1.32584	1.4347	1.38319		-0.841812	0.541118	-0.15303	0.999999	0.999998	1	1
298	17256	AA028786	male enhanced antigen 1	Mea1	1	0.93906	1.00098	1.02864	1.1277	1.0864	1.013	1.06966		-1.38258	0.788425	-0.885481	0.995025	0.499067	0.895646	0.982922
299	16828	AA028349	lactate dehydrogenase 1, A chain	Ldh1	1	0.970046	0.950146	1.04815	1.10451	1.10982	1.2929	1.08743		-1.01205	0.81363	-1.34793	0.928655	0.532922	1	0.999969
300	59069	AA032933	tropomyosin 3, gamma	Tpm3	1	0.992705	0.913546	1.02559	1.04087	1.08732	1.19032	1.08064		-1.47609	-0.014235	-1.42812	0.998932	0.128475	0.959886	-0.46424
301	11545	AA032357	ADP-ribosyltransferase (NAD+; poly (ADP-ribose) polymerase) 1	Adprt1	1	0.910941	0.899648	1.0327	1.00925	1.12822	1.2486	1.18798		-0.254397	0.865839	0.972191	0.972191	0.983841	0.999996	0.993882
302	22117	AA032612	thiosulfate sulfurtransferase, mitochondrial	Tst	1	0.933006	1.01784	0.893697	1.14291	1.13867	1.17213	1.00831		-0.692601	-1.24754	0.729553	0.949549	0.853315	0.595537	-0.970697
303	51810	AA032558	heterogeneous nuclear ribonucleoprotein U	Hnrpu	1	0.85063	0.785552	0.755993	1.01676	1.01902	1.10623	1.05217		-1.33875	0.998581	0.925112	-1.52594	-1.46551	-1.27961	-0.210584
304	17096	AA032394	Yamaguchi sarcoma viral (v-yes-1) oncogene homolog	Lyn	1	0.868917	0.816464	0.987613	1.11512	1.07704	1.05009	1.08706		0.999145	0.989985	0.999999	0.862797	0.945603	0.984283	0.959886
305	12442	AA033463	cyclin B2	Ccnb2	1	0.858679	0.662515	1.2726	1.08882	1.02796	0.930637	0.881198		0.839807	0.999029	0.997872	-0.631897	-0.210584	-0.827122	-0.722789
306	381799	AA033337	similar to Translationally controlled tumor protein (TCTP) (p23) (21 kDa polypeptide) (p21) (Lens epithelial protein)	na	1	1.02777	0.963704	0.857507	1.00937	1.08505	1.06411	1.08414		-1.47092	-0.298697	0.270452	0.541118	0.734917	-0.984582	-1.50541
307	229663	AA033352	DNA segment, Chr 3, MJeffers 1	D3Jfr1	1	1.01958	0.807199	0.724448	1.08279	1.0728	1.2263	1.25578		-0.827122	0.950806	0.936869	-0.677461	-0.885481	0.718561	0.651586
308	12626	AA033392	centrin 3	Cetn3	1	0.931104	0.854223	0.885332	1.02288	0.963853	1.29249	1.29502		-0.692601	0.994875	0.997593	0.115977	-0.254397	0.999522	0.99991
309	69953	AA034754	RIKEN cDNA 2810025M15 gene	2810025M15Rik	1	0.952044	0.949275	1.03889	1.13541	0.877539	0.764447	0.739504		-1.36567	-0.12466	0.993882	-1.34793	0.0257951	0.718561	0.972191
310	18002	AA014342	neural precursor cell expressed, developmentally down-regulated gene 8	Nedd8	1	1.04116	0.983518	0.832166	1.01621	1.06216	1.08658	1.04844		-0.677461	-0.509918	1	-0.0413552	-0.782702	0.999985	0.454309
311	17128	AA030901	MAD homolog 4 (Drosophila)	Madh4	1	1.07521	1.05983	0.95689	0.957358	0.767443	0.887224	1.0852		-1.05243	-0.647106	-0.494679	-1.52594	0.949549	0.346179	-1.34793
312	20832	AA030906	signal sequence receptor, delta	Ssr4	1	1.00731	1.13836	1.03544	1.02226	1.05442	1.07159	1.05717		-1.44151	0.765323	-1.52503	0.938406	-0.841812	0.828996	-1.20238
313	68776	AA034616	TAF11 RNA polymerase II, TATA box binding protein (TBP)-associated factor	Taf11	1	0.849819	0.886079	0.886648	0.910532	1.1219	1.18589	1.19572		0.994232	0.938406	0.904956	0.809612	0.880193	0.999089	0.959886
314	20044	AA015188	ribosomal protein S14	Rps14	1	0.969457	1.01915	1.09475	1.11755	1.28474	1.24761	1.24997		0.701406	-1.52388	-0.631897	0.988776	0.99997	0.999537	0.999999
315	15191	AA015083	hepatoma-derived growth factor	Hdgf	1	0.993306	0.891162	0.932284	0.947526	1.01954	1.22439	1.0336		0.541118	0.991323	-0.782702	-1.09175	0.490333	0.99949	0.189453
316	14254	AA014250	FMS-like tyrosine kinase 1	Flt1	1	0.854645	0.808046	1.04342	0.914008	1.09055	1.13071	1.07701		0.964759	0.995451	0.712933	-1.36567	0.0389594	-0.0965808	-1.16682
317	19921	AA035973	ribosomal protein L19	Rpl19	1	0.949426	1.02176	1.02551	1.09217	1.17259	1.12517	1.11496		-0.110583	-1.48101	-1.43493	0.856536	0.952034	0.969086	0.989091
318	54401	AA039002	tyrosine 3-monooxygenase/tryptophan 5-monooxygenase activation protein, beta polypeptide	Ywhab	1	0.879694	0.85763	1.01101	1.1058	0.979499	0.946042	0.923499		0.998061	0.99949	0.976945	0.98041	-0.647106	-1.51155	0.953235
319		AA041636			1	1.11234	0.930104	0.953615	1.22333	1.12693	1.32735	1.22258		0.900396	0.346179	-1.49827	0.999994	0.882898	0.999995	0.999224
320	22057	AA036170	transducer of ErbB-2.1	Tob1	1	0.791202	0.782985	0.629764	0.789213	0.675949	0.707434	0.726503		0.992271	0.978742	0.999971	0.904956	1	0.999997	0.999993
321	58803	AA038137	RIKEN cDNA 1110035E17 gene	1110035E17Rik	1	1.07713	0.895666	0.981008	1.13234	1.14676	1.20036	1.20967		-1.48101	0.923283	-0.984582	0.999667	0.999438	1	0.999677
322	12874	AA038455	carboxypeptidase D	Cpd	1	1.00463	0.893961	0.852075	1.0481	1.11344	1.09644	1.16419		-0.722789	0.865839	0.921414	0.856536	0.565069	0.115977	0.992271
323	19170	AA039189	proteasome (prosome, macropain) subunit, beta type 1	Psmb1	1	1.08262	1.03868	1.05001	0.907522	1.03992	1.33242	1.17193		0.0389594	-0.358413	0.970676	0.292632	-1.44786	0.999951	0.945603
324	11758	AA039135	peroxiredoxin 6	Prdx6	1	1.04861	1.03575	1.04254	0.980414	0.9587	1.02586	1.01729		0.617308	0.281596	-1.46551	0.999988	-1.45986	0.0778972	0.999975
325	15463	AA049862	HIV-1 Rev binding protein	Hrb	1	0.834393	0.759716	0.965338	0.940867	1.17026	1.16756	1.22153		0.972921	0.999839	0.999552	0.644928	0.969086	0.999936	0.998932
326	70533	AA041651	RIKEN cDNA 4632412E09 gene	4632412E09Rik	1	0.900099	0.864016	0.775608	1.07782	1.30475	1.33447	1.26748		0.907166	0.999973	0.999944	0.993121	1	1	1
327	15893	AA041785	islet cell autoantigen 1	Ica1	1	0.818355	0.773138	0.821505	1.13957	1.06653	1.19365	1.1062		0.987074	0.989985	0.997593	0.490333	-0.94264	0.944227	0.51621
328		AA050086			1	0.880724	0.929448	0.832082	1.06382	1.08828	1.09459	1.18548		0.944227	0.396981	0.999632	0.376991	0.396981	0.472539	0.935297
329	19684	AA050683	radixin	Rdx	1	0.994233	0.799982	0.673367	0.994228	0.859602	0.98309	0.889318		-0.0826553	0.996733	0.999981	-1.11733	0.950806	0.499067	0.98594
330		AA049474			1	0.98348	0.908485	0.761993	1.08365	1.00462	1.19107	1.12622		0.729553	0.532922	0.995313	0.992271	-0.138809	0.979312	0.572842
331	19242	AA049699	pleiotrophin	Ptn	1	0.90564	0.813898	0.91225	1.02624	1.0564	1.26611	1.29986		0.999986	1	0.998	0.999797	0.999999	1	1
332	20463	AA050684	cytochrome c oxidase subunit VIIa polypeptide 2-like	Cox7a2l	1	0.89418	1.05043	0.880533	1.12641	1.11953	1.16148	1.13114		-1.41382	-1.39864	0.839807	0.909332	0.454309	0.788425	-0.269112
333	15289	AA050755	high mobility group box 1	Hmgb1	1	0.949359	0.910546	0.831038	0.977329	0.940995	1.05395	1.04067		-0.298697	0.177461	0.998998	-0.269112	0.588076	-1.45398	-1.2691
334		AA050665			1	1.08261	0.974364	0.989277	1.12564	1.11545	1.2561	1.18137		0.946948	-1.31981	0.999272	0.99981	0.998489	1	1
335	78038	AA050443	RIKEN cDNA 4930552N12 gene	4930552N12Rik	1	0.948825	1.01205	0.978583	1.11789	1.15096	1.08179	1.22024		-0.0413552	-0.647106	0.565069	0.996422	0.236374	0.236374	0.967417
336	67186	AA047991	ribosomal protein, large P2	Rplp2	1	1.0058	1.05646	1.07197	1.20078	1.20552	1.25704	1.30545		-1.07877	-1.34793	-1.48569	0.998862	0.998288	0.999993	0.999956
337	12585	AI385804	cerebellar degeneration-related 2	Cdr2	1	0.876678	0.744576	1.03449	0.796253	0.998902	1.29337	1.2518		0.828996	0.998667	0.945603	0.991323	-0.812371	0.999688	0.988776
338	15211	AA050045	hexosaminidase A	Hexa	1	0.913639	0.924416	1.01145	1.03348	1.20151	1.22888	1.30203		0.998178	0.904956	0.734917	0.944227	0.999667	0.999995	1
339	12859	AA049270	cytochrome c oxidase, subunit Vb	Cox5b	1	1.01902	0.954274	0.969228	0.998616	1.09813	1.12525	1.10984		-1.50541	-0.540421	-0.956715	0.638172	-0.110583	-0.494679	0.445029
340	19942	AA049235	ribosomal protein L27	Rpl27	1	0.809197	0.976486	0.979048	1.25603	1.3155	1.36869	1.33556		0.993512	-0.797563	-0.782702	0.999698	0.999969	0.999993	0.999993
341	20422	AI323052	split hand/foot deleted gene 1	Shfdg1	1	1.00489	0.937025	1.05103	1.01698	1.0721	1.20417	1.14783		-0.32847	0.99107	-1.32938	-1.49827	0.989397	1	0.999473
342	22433	AA049245	X-box binding protein 1	Xbp1	1	0.780418	0.936876	0.85726	1.04819	0.949921	0.929383	0.955471		0.999839	0.0389594	0.490333	0.387041	0.224802	0.983388	0.985541
343	14768	AA059861	LanC (bacterial lantibiotic synthetase component C)-like	Lancl1	1	1.02036	0.957971	1.14824	1.12255	0.984419	0.875439	0.851803		-1.49013	0.760463	-0.110583	-1.36567	-1.17883	-1.51668	-0.899893
344	84095	AA059952	phosphatidylinositol 4-kinase type 2 alpha	Pi4k2a	1	1.03663	1.02102	1.07477	1.14313	1.01612	1.07715	0.915883		0.42614	-1.45398	-1.2691	0.999953	-0.479452	0.128475	0.846688
345	17748	AA051654	metallothionein 1	Mt1	1	0.802424	0.816891	0.515336	0.735959	0.590917	0.631454	0.903206		0.24784	0.0906873	0.999776	0.745388	0.995171	0.981453	-0.94264
346	14681	AA051709	guanine nucleotide binding protein, alpha o	Gnao	1	1.0157	0.753979	1.02907	0.925007	0.903617	0.946872	1.16582		0.270452	0.99683	0.995451	0.745388	-1.10461	-0.956715	-0.0826553
347	114896	AI385819	AFG3(ATPase family gene 3)-like 1 (yeast)	Afg3l1	1	1.02341	0.97745	1.10997	1.04498	1.05872	1.21228	1.20911		0.998825	-1.28994	-1.52658	0.989695	-1.43493	1	0.980938
348	76709	AA064058	actin related protein 2/3 complex, subunit 2	Arpc2	1	0.9985	0.992453	0.920744	0.979172	0.96123	1.00798	1.25052		-1.45986	-1.39864	0.565069	-0.32847	-1.42812	-1.28994	-0.388504
349	26457	AA059983	solute carrier family 27 (fatty acid transporter), member 1	Slc27a1	1	0.885462	0.703253	0.946623	0.836855	0.926824	1.06183	1.13769		1	1	1	0.970676	-1.11733	-0.601435	0.836269
350		AA087137			1	0.97027	0.913388	0.853934	1.16178	1.29615	1.26703	1.19589		0.0906873	0.20134	0.987074	0.988776	0.99997	0.999938	0.99991
351		AA060906			1	0.892985	1.01416	0.842532	1.1669	1.11551	1.25869	1.20781		0.788425	0.30356	0.982445	0.999996	0.989695	1	0.989091
352	14595	AA079961	UDP-Gal:betaGlcNAc beta 1,4- galactosyltransferase, polypeptide 1	B4galt1	1	0.855936	0.967623	0.891952	1.0681	1.06918	1.14755	1.18069		1	0.177461	1	0.998998	0.999438	0.997017	0.999995
353	22388	AA097808	WD repeat domain 1	Wdr1	1	0.824488	0.855613	0.961582	1.19648	1.05524	1.16166	1.10958		0.999936	0.998825	0.707215	0.999964	0.846688	0.997518	0.638172
354	14077	AA098541	fatty acid binding protein 3, muscle and heart	Fabp3	1	0.82013	0.792836	0.807997	0.969335	0.89646	0.686745	0.835676		0.80136	0.839807	0.926903	-1.16682	-0.32847	0.99683	0.445029
355	50878	AA097991	stromal antigen 3	Stag3	1	0.937633	0.971918	0.925638	1.10769	0.948737	1.08355	1.16017		0.946948	0.524619	0.988454	0.932048	-0.73783	0.985133	0.975007
356	56012	AA063766	phosphoglycerate mutase 2	Pgam2	1	0.959779	0.957027	0.823912	1.01589	0.920207	1.11643	1.20565		0.549207	0.658147	0.996632	-0.449046	-1.42812	0.805523	0.995715
357	108143	AA108210	TAF9 RNA polymerase II, TATA box binding protein (TBP)-associated factor	Taf9	1	0.92991	0.907006	0.798856	0.917695	1.09329	1.12824	1.23228		0.995025	0.997593	0.999881	-1.47092	0.416531	0.941381	0.999953
358		AI325672			1	1.00338	1.03066	0.981755	0.996581	1.02556	1.02043	1.02908		-0.358413	-1.41382	0.853315	-0.970697	-0.22513	-0.0413552	-1.48101
359	19941	AA089242	ribosomal protein L26	Rpl26	1	1.09437	1.09135	0.947106	1.14606	1.09579	1.15363	1.31285		-1.14236	-0.570935	-1.52658	0.999959	0.945603	0.995171	0.998581
360	320184	AI325749	RIKEN cDNA C330018J07 gene	C330018J07Rik	1	1.08255	1.07831	1.05652	0.986419	1.04094	1.04712	1.08289		0.917555	0.532922	0.445029	0.989091	-1.17883	-0.014235	0.565069
361	18263	AA117848	ornithine decarboxylase, structural	Odc	1	0.808475	0.8847	0.975435	0.929093	1.45555	1.40647	1.32495		0.997872	0.987782	-0.239735	-0.73783	1	1	0.999999
362	22187	AA117928	ubiquitin B	Ubb	1	0.990236	1.00865	0.893552	1.03116	1.06301	1.11667	1.07918		-1.45398	-1.52658	0.445029	0.805523	-0.358413	0.856536	0.30356
363	21778	AA119696	testis expressed gene 9	Tex9	1	0.981145	0.715038	1.34418	0.85948	0.982271	0.96887	0.940709		0.755521	0.998288	0.935297	0.809612	-0.46424	-0.0826553	-1.49827
364	66105	AA123113	ubiquitin-conjugating enzyme E2D 3 (UBC4/5 homolog, yeast)	Ube2d3	1	0.885043	0.903552	0.767461	1.03051	1.09134	1.16489	1.08642		0.43564	0.644928	0.948263	0.765323	-0.403598	-0.32847	0.472539
365	19164	AA162310	presenilin 1	Psen1	1	0.926198	0.889644	1.17514	0.995557	1.08977	1.04086	0.991016		0.557191	0.991323	0.335688	-1.50541	0.992044	0.999885	0.052032
366	73834	AA109695	ATPase, H+ transporting, V1 subunit D	Atp6v1d	1	0.974653	0.88813	0.772426	1.09508	0.899759	1.10705	1.04558		0.797124	0.999797	-0.12466	0.631317	-0.014235	-0.12466	-1.39864
367	57320	AA108826	Parkinson disease (autosomal recessive, early onset) 7	Park7	1	0.993855	1.02162	1.02895	1.0471	1.01385	1.0307	1.00657		0.0650117	-1.46551	-1.48101	0.994232	-0.16732	0.718561	-0.0550409
368	22340	AI326671	vascular endothelial growth factor B	Vegfb	1	0.987227	0.945343	0.997824	1.22507	1.11222	1.25691	1.34479		0.670979	0.387041	-0.0550409	0.999999	0.999783	0.999994	1
369	11677	AA108357	aldo-keto reductase family 1, member B3 (aldose reductase)	Akr1b3	1	1.0375	0.918098	0.920861	1.12059	0.970146	1.04295	1.00472		-1.30008	0.850033	0.689515	0.978742	-1.25841	0.588076	0.718561
370	103694	AA109932	RIKEN cDNA 1110014L17 gene	1110014L17Rik	1	0.926095	0.953196	0.930115	1.10265	1.05201	1.08107	1.05023		-0.870995	0.213124	0.859697	-0.16732	-1.48569	0.595537	0.454309
371	76281	AA111643	RIKEN cDNA 1300011C24 gene	1300011C24Rik	1	0.921568	0.968868	0.985882	1.20498	1.0825	1.18069	1.35445		-1.49013	0.532922	-0.856437	0.962878	0.565069	0.999988	0.994563
372	16201	AA108959	interleukin enhancer binding factor 3	Ilf3	1	1.31505	1.09134	1.04069	1.31893	1.03772	1.41441	1.0838		0.998625	0.0389594	-1.22529	0.99107	-1.44786	0.999248	0.524619
373	67003	AA108590	RIKubiquinol cytochrome c reductase core protein 2	Uqcrc2	1	1.03429	1.0308	0.858694	1.1063	1.15089	1.08187	1.14818		0.416531	-0.388504	0.99157	0.750497	0.987782	-0.449046	0.724101
374	26442	AA110250	proteasome (prosome, macropain) subunit, alpha type 5	Psma5	1	0.971904	0.971231	0.851152	1.25157	1.29852	1.35427	1.28767		-1.21392	-0.181677	-0.899893	1	0.999926	1	0.999997
375	67680	AA108475	succinate dehydrogenase complex, subunit B, iron sulfur (Ip)	Sdhb	1	1.00565	1.01565	0.923356	1.0915	1.11319	1.03681	1.01725		0.128475	-1.07877	0.809612	0.664611	0.850033	-1.41382	-0.418722
376		AA111722			1	0.86231	0.90917	0.890897	1.28009	1.09129	1.13012	0.963326		0.24784	-1.50197	0.923283	0.993512	0.917555	-1.47092	-0.254397
377	56752	AA109914	aldehyde dehydrogenase 9, subfamily A1	Aldh9a1	1	0.988416	1.00171	0.820839	1.09523	1.14678	1.20403	1.18039		-1.42812	0.236374	0.998965	0.998178	0.972921	0.975007	0.997666
378	13427	AA118591	dynein, cytoplasmic, intermediate chain 2	Dncic2	1	0.985107	0.853795	0.831096	1.09035	1.09094	1.27793	1.17209		-1.44786	0.984713	0.998441	0.993699	-0.0550409	0.999984	0.996422
379	84092	AA119665	ubiquitin specific protease 8	Usp8	1	0.982273	0.816315	0.756296	0.976908	0.984117	1.10374	1.08279		-1.2691	0.997666	0.999999	-1.36567	-0.782702	-0.433872	-1.52658
380	19286	AA117045	6-pyruvoyl-tetrahydropterin synthase	Pts	1	0.988473	0.887048	0.97492	0.978112	0.934931	0.998233	1.0456		-0.856437	0.995964	0.999996	0.532922	-0.662294	-0.870995	0.481491
381	18813	AA110641	proliferation-associated 2G4	Pa2g4	1	0.962349	0.89821	1.03402	1.03296	1.10218	1.05107	0.984175		-0.885481	0.755521	0.999029	0.472539	0.987074	0.996422	-1.31004
382	67870	AA119312	RIKEN cDNA 2310057D15 gene	2310057D15Rik	1	0.962654	0.911774	0.989621	0.982841	1.04866	1.07115	1.13857		0.572842	0.975669	0.999877	0.935297	0.902699	0.624363	0.999991
383		AI510635			1	1.80938	1.21083	1.10738	1.52186	0.980954	1.63808	1.32634		0.999978	0.115977	-1.42812	0.99683	-1.48101	0.997805	0.770102
384	69192	AA119035	DEAH (Asp-Glu-Ala-His) box polypeptide 16	Dhx16	1	0.995141	0.976213	0.990189	0.987301	1.05559	1.00127	1.02835		-1.11733	0.740195	0.988776	-0.418722	-1.51886	0.9962	0.80136
385	27406	AA125260	ATP-binding cassette, sub-family F (GCN20), member 3	Abcf3	1	0.938425	0.794092	0.899905	0.837405	1.10312	1.40206	1.57699		-0.914225	0.982922	-1.40634	0.923283	0.868823	0.995171	0.998
386		AI530746			1	0.783645	0.891237	1.02307	0.91759	0.893004	1.21375	1.28182		0.485961	0.111112	-0.796744	0.752648	0.298732	0.982597	0.970929
387	16842	AA119479	lymphoid enhancer binding factor 1	Lef1	1	0.959471	0.827297	0.946924	0.946879	0.98166	1.21172	1.19269		-1.48381	0.981613	0.634496	0.382363	0.231486	0.937413	0.993377
388	14651	AA125236	hydroxyacyl glutathione hydrolase	Hagh	1	0.880677	0.853098	1.05951	1.03769	1.00102	1.10645	1.22521		0.431088	-1.14814	-0.811367	0.440506	-0.157255	-0.200146	-1.29012
389	50995	AA123862	ubiquitin-like 1 (sentrin) activating enzyme E1B	Uble1b	1	0.928201	0.784377	0.957437	0.938203	1.15418	1.37129	1.35273		-1.48989	0.992771	-0.406489	0.511937	0.990071	1	0.999922
390	229906	AA120690	general transcription factor IIB	Gtf2b	1	0.785297	1.03725	1.01721	1.22622	1.18745	1.03812	1.18993		0.731884	0.815237	-1.06085	0.822991	0.762529	0.994281	0.999611
391		TRZ502			1	1.12116	0.901898	1.24852	1.09493	1.15082	1.12245	1.14524		-1.39301	0.991643	-0.157255	0.896546	0.991643	0.99994	0.985666
392	66419	AA125287	mitochondrial ribosomal protein L11	Mrpl11	1	1.07792	0.913803	1.13805	1.16987	1.11266	0.955405	1.29143		0.1236	0.440506	0.309565	0.920199	0.999097	0.995213	0.999999
393	22272	AA125131	RIKEN cDNA 1500040F11 gene	1500040F11Rik	1	0.936706	1.03211	1.04031	0.97526	1.04939	1.1678	1.13193		0.757629	-1.42046	-0.617826	-0.692986	0.568819	0.781323	0.96684
394	15356	AA125224	3-hydroxy-3-methylglutaryl-Coenzyme A lyase	Hmgcl	1	0.807232	0.908128	1.06738	1.17775	1.09432	1.10045	1.25704		0.872855	-0.0188909	0.330908	-0.00548974	0.996761	0.703981	0.990623
395	21841	AA117605	cytotoxic granule-associated RNA binding protein 1	Tia1	1	0.775905	0.971329	0.926779	0.97839	0.87668	1.26186	1.28818		0.68616	0.907967	0.997462	-1.36203	-1.19483	0.999153	0.988553
396	18607	AA117492	3-phosphoinositide dependent protein kinase-1	Pdpk1	1	0.916382	0.816606	0.84664	1.1748	1.116	1.28112	1.28486		0.920199	0.949984	0.999097	-0.481791	0.477087	0.999526	0.999999
397	12465	AA120241	chaperonin subunit 5 (epsilon)	Cct5	1	0.752834	0.833806	0.866689	1.14941	0.992972	1.14417	1.16054		0.999936	0.84801	-0.229046	0.673816	-1.11155	0.767347	-1.2061
398		AI386097			1	0.827946	0.926393	1.00497	1.08064	1.09525	1.29468	1.15616		0.989488	-1.37795	-0.331838	0.803073	0.561009	0.979491	0.520381
399	21672	AA117023	peroxiredoxin 2	Prdx2	1	0.987019	0.95183	0.857602	0.913223	1.11962	1.12555	1.08008		-0.171488	0.762529	0.979491	-0.89772	-1.44425	0.762529	-0.376531
400		AA137762			1	0.953888	0.921802	0.833158	1.37226	1.12081	1.17212	1.19249		-1.14814	-1.25995	0.742436	0.975879	-0.722845	0.927533	0.938937
401	20924	AA137833	suppressor of Ty 5 homolog (S. cerevisiae)	Supt5h	1	0.820056	0.89991	0.850838	1.06113	1.16296	1.18716	1.19064		0.963198	0.988553	0.999738	0.576525	0.918266	0.914275	0.851326
402	12301	AA123692	calcyclin binding protein	Cacybp	1	0.895141	0.910215	0.759908	1.24339	1.08126	1.22206	1.4829		-1.0215	0.803073	0.184554	0.907967	0.00782595	0.99318	0.953638
403	21767	AA122430	testis expressed gene 264	Tex264	1	0.748491	1.06572	0.955486	1.11809	1.0778	1.04309	0.997317		0.999006	-1.49498	0.781323	-0.3467	0.83047	-0.939843	-0.0871255
404	68067	AA123801	RIKEN cDNA 3010026O09 gene	3010026O09Rik	1	1.11202	1.03184	0.897764	1.23131	1.0978	1.09035	1.12337		0.568819	-0.0323761	-1.28025	0.794599	-1.49905	0.468105	0.485961
405	12349	AA122925	carbonic anhydrase 2	Car2	1	0.832478	0.916182	1.11532	1.26755	1.55084	1.58951	2.02566		-0.258169	0.737203	-0.24358	0.973861	1	1	1
406	14433	AA122891	glyceraldehyde-3-phosphate dehydrogenase	Gapd	1	1.06496	0.909427	0.831598	1.12475	0.946076	1.03292	0.965476		0.0858481	-1.2061	0.709739	-1.43282	-0.527138	-0.925889	0.568819
407	56434	AA153003	transmembrane 4 superfamily member 8	Tm4sf8	1	0.842953	0.856194	1.0076	1.2208	1.05277	0.836256	0.928398		0.82938	0.658593	0.994257	-1.25953	0.32881	-1.99796	-1.94479
408	21917	AI386176	thymopoietin	Tmpo	1	0.809493	0.896334	0.898282	1.266	1.21426	1.25996	1.28563		0.684739	0.833138	0.510101	0.999933	0.998512	0.985874	0.99999
409	56398	AA137748	RIKEN cDNA 1500003O03 gene	1500003O03Rik	1	1.07949	1.14269	0.915388	0.909145	1.01761	1.15245	1.31887		0.246975	-1.85268	0.974719	-1.57699	0.944382	0.036021	0.553257
410	12215	AA145723	basigin	Bsg	1	1.13861	0.971119	1.07217	1.20264	1.01669	1.56519	1.68047		0.904267	-1.03097	0.105461	0.985469	0.658593	1	1
411	11951	AA139793	ATP synthase, H+ transporting, mitochondrial F0 complex, subunit c (subunit 9), isoform 1	Atp5g1	1	1.06073	0.976426	1.06638	1.06302	0.950271	1.068	1.00866		-1.9255	-0.687278	0.553257	0.743067	-0.832013	0.637868	-2.00485
412	67857	AA146157	protein phosphatase 6, catalytic subunit	Ppp6c	1	0.821398	0.74556	0.941045	0.990617	0.950181	1.19852	1.11215		0.913066	0.999844	0.7209	-1.503	0.259059	0.434633	-1.83358
413		AA152636			1	0.984294	1.06569	1.24795	0.920753	1.15968	1.298	1.47952		-1.40906	-1.59127	0.743067	-0.741412	1	1	1
414	17344	AA142756	Msx-interacting-zinc finger	Miz1	1	0.814157	0.95376	1.1501	1.18415	0.937321	0.90591	0.966614		0.913066	0.989681	0.753593	-0.17438	-0.669291	-1.97967	0.482739
415		AA154420			1	0.956754	1.04558	0.968328	0.917602	1.08526	0.983111	1.14651		0.527727	0.118971	0.118971	-0.741412	0.963234	0.737666	0.691016
416	12774	AA144482	chemokine (C-C motif) receptor 5	Ccr5	1							0.958341
417	17184	AA138194	matrin 3	Matr3	1	0.89999	0.768329	0.99025	0.970378	0.989516	1.16372	1.09154		-0.723341	0.962253	0.246975	-0.544532	-0.633425	-0.562211	0.424631
418	18854	AI324338	promyelocytic leukemia	Pml	1	0.975073	0.841769	0.92817	0.916132	1.10948	1.39614	1.21636		-1.9185	-1.72341	0.282833	-1.89585	-1.89585	0.913066	0.926747
419	67345	AA146534	RIKEN cDNA 1700056O17 gene	1700056O17Rik	1	0.9166	1.03863	0.871926	1.04959	1.22488	1.20156	1.31824		0.0501588	-0.940806	0.836826	-0.47441	0.561528	0.999652	0.999724
420	14268	AA145458	fibronectin 1	Fn1	1	0.941744	0.88876	0.797589	1.02185	0.913099	0.929783	0.863463		-1.22516	-1.13783	0.82938	-1.22516	-1.60536	0.246975	0.585634
421	21917	AA138415	thymopoietin	Tmpo	1	0.972359	0.768894	1.06898	0.914722	0.956609	1.08652	1.24804		-0.17438	0.999604	-1.81347	-1.48771	-0.922699	0.132353	0.813613
422	13000	AA155019	casein kinase II, alpha 2, polypeptide	Csnk2a2	1	0.912222	1.03417	0.74874	1.08727	1.12867	1.2768	1.46617		0.843992	-0.958893	0.630742	-1.83358	0.306084	0.999997	0.999892
423	12517	AA163997	CD72 antigen	Cd72	1	0.837855	0.910592	0.692501	0.760954	0.70048	0.869696	1.11828		0.703267	0.987744	0.997621	0.930285	0.999993	0.964191	0.994589
424	22041	AA172830	transferrin	Trf	1	1.03042	1.01606	0.993037	1.02992	1.01414	1.01467	1.02872		-3.0968	-2.79852	0.313115	0.974969	0.33772	-2.15775	-2.20399
425	22222	AA154379	ubiquitin protein ligase E3 component n-recognin 1	Ubr1	1	0.943577	0.739826	0.870506	0.895526	0.974602	1.36467	1.46954		0.150976	0.780321	0.888734	-2.54802	-1.77152	0.150976	-0.595194
426	269523	AA168189	valosin containing protein	Vcp	1	0.996983	0.909048	0.88525	1.11185	1.06632	1.24251	1.46445		-2.95247	-2.11094	-1.24892	0.957965	-2.03979	0.999954	-0.366654
427	19118	AI322783	protamine 1	Prm1	1	0.818163	0.858026	0.89109	1.09317	0.926178	1.26209	1.1052		0.939215	-0.269334	0.990272	-2.60625	-2.84457	0.0286937	0.992093
428	21954	AI324533	troponin I, cardiac	Tnni3	1	0.836755	0.820871	0.878092	1.2835	1.32833	1.26636	1.26667		0.967035	0.939215	-1.74673	0.98659	0.992325	0.799305	0.993391
429		AA178349			1	0.882437	0.619902	0.666604	0.807188	1.0584	1.19008	1.44572		-0.250385	0.999778	0.987707	-0.818504	-0.705148	-1.82095	0.765088
430		AA178369			1	0.985722	0.90434	0.969303	1.05431	1.19226	1.31316	1.46098		-1.87014	0.361652	0.957965	0.939215	0.99997	1	1
431		AA174585			1	0.96171	0.777622	0.869168	1.14366	1.03103	1.32264	1.07612		-2.44615	0.962248	0.997676	0.840677	-2.38238	0.935987	0.844372
432	11819	AA170421	nuclear receptor subfamily 2, group F, member 2	Nr2f2	1	0.870279	0.898422	1.04543	1.19875	1.17926	1.40206	1.68361		0.963254	0.891423	-3.13036	0.996725	0.999989	0.999998	1
433	14489	AA175524	myotrophin	Mtpn	1	1.20161	0.771821	0.977941	0.721115	1.01271	0.923758	1.27697		-2.52811	0.994485	-2.01584	0.0758984	-3.10244	-3.13795	-1.32306
434	53334	AA178009	golgi SNAP receptor complex member 1	Gosr1	1	0.791966	0.80347	1.16601	1.11196	1.17101	1.38705	1.40185		-1.69702	0.940773	-1.77152	-3.00821	0.707639	0.999992	0.999679
435	18127	AA177240	nitric oxide synthase 3, endothelial cell	Nos3	1	0.823578	0.783942	0.954958	0.895992	0.957391	1.17935	1.26252		-1.17528	0.999968	0.0446089	0.921459	-3.09075	0.713872	0.46125
436	20511	AA177545	solute carrier family 1, member 2	Slc1a2	1	1.0102	0.908387	0.846544	1.12694	1.04504	1.1403	1.37758		-0.23161	0.984951	0.501413	-1.2983	0.789998	0.991356	1
437	54138	AA186130	spinocerebellar ataxia 10 homolog (human)	Sca10	1	1.05069	0.916663	1.11076	0.84937	1.08595	1.01513	1.06141		-2.50797	0.969631	-1.52233	0.440239	0.136319	0.954464	0.989982
438	68028	AA174807	RIKEN cDNA 3110001N18 gene	3110001N18Rik	1	0.845577	0.988873	0.992803	1.32558	1.55432	1.40263	1.87638		-3.71987	0.986364	-0.385955	0.999999	0.999996	1	1
439	14102	AA178126	tumor necrosis factor receptor superfamily, member 6	Tnfrsf6	1	1.01366	0.906875	0.981425	1.01411	1.10826	0.996803	1.05771		-5.35438	-2.20251	-0.00706208	-4.50204	-5.49485	-3.4892	-1.79674
440	16452	AA178495	Janus kinase 2	Jak2	1	0.790732	0.750242	0.956916	1.15171	0.878155	0.995428	1.02805		0.60396	0.960511	0.987526	-2.47036	0.368457	-4.68924	-4.09075
441	231329	AA178762	polymerase (RNA) II (DNA directed) polypeptide B	Polr2b	1	1.07307	0.885516	0.727039	0.933106	0.838725	0.93885	1.15931		-1.83271	0.998916	0.87292	-0.00706208	-3.01866	-1.9418	0.993781
442	22411	AA183414	wingless-related MMTV integration site 11	Wnt11	1	0.958334	0.822973	0.825099	0.973982	0.970771	1.27597	1.25151		-3.17623	-5.52273	0.93189	-2.58682	-5.36896	-3.09748	0.0114219
443	16177	AA177717	interleukin 1 receptor, type I	Il1r1	1	0.684863	0.836453	0.89628	0.953213	1.16132	1.19629	1.44351		0.980606	-0.0836351	-0.185396	-0.771113	0.418261	0.653432	0.990183
444	12540	AA177796	cell division cycle 42 homolog (S. cerevisiae)	Cdc42	1	0.868878	1.13428	0.823434	1.16937	1.12469	1.25997	1.06144		-4.94163	-5.50678	-5.19621	0.893676	0.933686	0.91583	0.998058
445	14069	AA184901	coagulation factor VIII	F8	1	0.796004	0.868707	1.01052	1.05391	1.13745	1.18189	1.2904		-4.23264	0.315232	0.629401	-5.51176	-5.21611	0.93189	0.99297
446	13163	AA184772	Fas death domain-associated protein	Daxx	1	0.810267	0.999207	0.928799	1.17262	1.17065	1.3671	1.40244		0.911307	-5.42111	-5.4434	0.954652	0.911307	0.999979	0.999979
447	67185	AA186138	RIKEN cDNA 2700059D21 gene	2700059D21Rik	1	1.04829	0.859963	0.841919	1.16649	1.07303	1.11407	1.26155		-4.96735	0.955885	0.985099	0.792062	0.82013	0.987892	0.992057
448	20022	AA182240	polymerase (RNA) II (DNA directed) polypeptide J	Polr2j	1	0.878823	1.03967	1.01316	1.1458	1.14043	1.19868	1.15466		0.393778	-5.50114	-2.01545	-2.12721	-1.41528	0.977587	0.997647
449	12343	AA185066	capping protein (actin filament) muscle Z-line, alpha 2	Capza2	1	0.961208	0.813921	0.830137	0.98695	1.15931	1.4914	1.41268		-4.74843	0.940443	-0.0258082	-3.79559	-1.72541	0.999979	0.989257
450	12331	AA189995	CAP, adenylate cyclase-associated protein 1 (yeast)	Cap1	1	0.924607	1.06989	0.821343	0.935942	1.1315	1.10739	1.27174		-5.39628	-5.38293	0.98893	-5.17575	-3.01866	-0.103445	0.982742
451	110074	AA204226	deoxyuridine triphosphatase	Dutp	1	0.884936	0.953572	0.936266	1.14796	1.10129	0.979923	1.07559		0.930049	-3.4892	0.567739	0.629401	0.287291	-0.716066	0.287291
452	12530	AA204385	cell division cycle 25 homolog A (S. cerevisiae)	Cdc25a	1	0.842849	0.832207	0.97015	1.19365	1.24484	1.19399	1.13107		-1.28363	0.0114219	0.475925	0.978224	0.855926	-0.482408	0.96265
453	68275	AA200638	replication protein A1	Rpa1	1	0.875618	0.934648	0.776898	1.26153	1.16294	1.25824	1.20961		0.954652	0.98893	0.999796	0.954652	0.995972	0.999961	0.999999
454	12366	AA200808	caspase 2	Casp2	1	1.02717	0.967829	0.898635	1.01676	1.03203	1.01732	1.14834		-1.55083	-0.855798	0.995292	-2.20251	0.328867	0.586185	0.855926
455	21390	AA198565	thromboxane A2 receptor	Tbxa2r	1	0.849576	0.801779	0.919729	1.00904	1.14606	1.09842	1.2216		-3.09748	0.99996	0.997492	-5.42111	0.937148	0.595155	0.796994
456	14678	AA197631	guanine nucleotide binding protein, alpha inhibiting 2	Gnai2	1	0.927675	1.22613	0.995745	1.08619	1.03957	1.1558	1.1254		-0.58341	-3.5666	-1.48258	0.453455	-0.00706208	0.796994	0.924249
457	66832	AA197708	RIKEN cDNA 4930524H12 gene	4930524H12Rik	1	0.85761	0.915822	1.06913	0.837918	0.951357	1.17739	1.29047		-1.44881	0.979448	-0.743448	0.913596	-2.08979	-1.97854	0.885189
458	15369	AA204279	heme oxygenase (decycling) 2	Hmox2	1	1.15478	1.07708	0.864991	0.953626	0.996234	1.30133	1.51778		0.890912	-5.4434	-4.01827	-0.339426	-4.23264	0.999845	0.999999
459	12336	AA221288	calpain, small subunit 1	Capns1	1	1.06295	0.985696	0.985451	0.922306	0.993018	1.24422	1.13065		-5.48029	-0.457869	-3.94487	-1.15604	-5.36896	0.99951	0.876093
460	13018	AA185183	CCCTC-binding factor	Ctcf	1	0.816846	0.865534	1.14622	1.00804	0.986967	0.892028	0.897067		-4.68924	0.972609	0.355477	-4.33607	-5.30698	-4.19757	-3.25484
461	55989	AA186002	nucleolar protein 5	Nol5	1	0.998744	0.98223	1.2061	0.957049	1.00687	1.00417	1.17911		-5.11105	-0.855798	0.116917	-3.75781	-1.31617	0.315232	0.166268
462	20687	AA204627	trans-acting transcription factor 3	Sp3	1	0.897944	0.820425	0.999733	1.29254	1.01228	0.912758	0.736876		0.0476103	0.953387	0.577047	-2.05254	-2.78246	-4.53419	-0.58341
463		AA265430	RIKEN cDNA 4921520N01 gene	4921520N01Rik	1	0.918965	0.845015	0.945934	0.855848	1.14705	1.10613	1.25989		-5.47204	0.213425	0.973379	-2.74321	-2.35483	0.418261	0.497622
464	97076	AA212292			1	0.945338	0.907915	0.87762	1.36278	1.11901	1.44239	1.67543		-4.40347	-2.43174	-3.79559	0.995972	0.937148	0.999999	1
465	15216	AA217236	hemochromatosis	Hfe	1	1.08883	1.04848	1.01836	1.18474	1.14072	1.15217	1.32852		-3.05808	-0.53234	0.0476103	-3.17623	0.997327	1	1
466	57808	AA221110	ribosomal protein L35a	Rpl35a	1	0.937103	0.933699	0.95486	1.26857	1.17317	0.917019	1.66325		0.528758	0.430194	-2.58682	0.940443	0.999993	0.999992	1
467	12843	AA222683	procollagen, type I, alpha 2	Col1a2	1	0.906512	1.02574	1.04083	1.05889	1.25003	1.38321	1.66404		0.453455	-1.83271	-0.771113	-1.03268	1	1	1
468	20588	AA221079	SWI/SNF related, matrix associated, actin dependent regulator of chromatin, subfamily c, member 1	Smarcc1	1	0.791007	1.04603	0.914119	0.997978	1.11368	1.23248	1.03846		0.852291	0.765783	0.776627	-2.58682	-3.4892	0.0114219	0.676112
469	17069	AA221666	lymphocyte antigen 6 complex, locus E	Ly6e	1	1.02188	1.05653	1.07459	1.03431	1.10416	1.22783	1.00332		-4.50204	-3.52796	-3.17623	-1.382	-4.91543	0.855926	-5.30698
470	12824	AA221672	procollagen, type II, alpha 1	Col2a1	1	0.91291	1.02926	0.894742	1.01232	0.949013	1.15479	1.27445		0.958257	-3.90785	-2.12721	-3.68176	-3.87062	0.938816	0.906563
471	17938	AA230684	nascent polypeptide-associated complex alpha polypeptide	Naca	1	1.05069	0.903432	0.87814	1.09445	1.08464	1.14196	1.13527		-5.33918	-2.08979	0.980035	0.969317	0.918011	0.947995	-0.0640932
472	12870	AA230354	ceruloplasmin	Cp	1	1.0283	0.937182	0.825775	0.942935	0.959453	0.979781	0.942534		-5.48029	0.668699	0.911307	-5.39628	-2.62581	-5.11105	0.976932
473	23897	AA253722	HS1 binding protein	Hs1bp1	1	0.958106	0.922623	1.0008	1.13961	1.20057	1.41604	1.44278		-2.90046	-0.942997	-3.5666	0.999952	0.999803	1	1
474	21371	AA222795	tubulin cofactor a	Tbca	1	1.0331	0.960072	0.852815	1.23577	1.40727	1.37602	1.75142		-2.82176	-3.33326	0.586185	0.999796	1	1	1
475	14872	AA230348	glutathione S-transferase, theta 2	Gstt2	1	0.836983	0.994577	0.835816	0.983277	1.48783	1.12113	1.40389		0.742701	-5.23545	-0.0448181	-5.06522	0.999293	-0.206567	0.99845
476		AA222128			1	0.937385	0.905379	0.863944	1.06301	1.0797	1.17892	1.22618		-2.08979	-3.52796	0.980035	-2.54791	0.418261	-0.249739	0.999714
477	15077	AA231572	histone 2, H3c1	Hist2h3c1	1	0.983064	0.80182	0.91102	1.3148	0.927856	1.19149	1.2042		0.924249	0.988594	0.999822	-0.0258082	0.999952	0.997152	1
478	20181	AA209592	retinoid X receptor alpha	Rxra	1	0.921697	0.947499	0.852728	1.21258	1.17314	1.19269	1.22357		-2.86109	-1.97854	0.629401	-0.103445	0.970173	0.586185	0.844775
479	67160	AA240994	RIKEN cDNA 2610301D06 gene	2610301D06Rik	1	0.909958	0.945993	0.878542	1.32608	1.20359	1.18955	1.11012		0.771261	-4.77738	0.924249	0.999945	0.996334	0.999962	0.997327
480	66046	AA222463	NADH dehydrogenase (ubiquinone) 1 beta subcomplex, 5	Ndufb5	1	0.891697	0.962232	0.841736	1.17585	1.15961	1.06962	1.20558		-1.25134	0.85948	0.999996	0.982742	0.676112	0.997327	0.999526
481	50912	AA231279	polymyositis/scleroderma autoantigen 2	Pmscl2	1	0.847562	0.821544	1.16618	0.954038	1.18374	1.14622	1.00055		0.995972	0.994503	0.661139	0.981703	0.99297	0.999999	0.977587
482	19186	AA239485	proteasome (prosome, macropain) 28 subunit, alpha	Psme1	1	0.909986	1.06179	0.933803	1.01295	1.124	1.12616	1.0334		-0.316584	-5.48029	-5.27238	-2.05254	0.586185	-1.51659	-5.19621
483	30939	AA250500	pituitary tumor-transforming 1	Pttg1	1	0.900761	0.837986	0.987594	0.883696	1.09005	1.25898	1.0349		0.940443	0.972609	-3.29408	0.82013	-4.8059	0.995972	-2.50908
484	19177	AA212838	proteasome (prosome, macropain) subunit, beta type 7	Psmb7	1	0.883937	0.941111	0.864461	1.16856	1.1137	1.19036	1.09472		0.946559	0.918011	0.328867	0.999774	-1.72541	0.724107	-3.4892
485	12175	AA212780	BCL2/adenovirus E1B 19kDa-interacting protein 1, NIP2	Bnip2	1	0.895187	0.804659	0.969734	1.14803	0.998263	0.917294	0.788733		-0.688966	0.85948	-0.228015	-2.54791	-5.50114	-5.19621	0.99397
486	15368	AA213167	heme oxygenase (decycling) 1	Hmox1	1	0.857098	0.936766	0.960194	0.962019	0.941834	1.00382	1.12282		0.924249	-5.06522	-3.05808	-5.43257	-2.05254	-4.91543	-1.18755
487	12007	AA213011	alpha-2-glycoprotein 1, zinc	Azgp1	1	0.995591	0.991774	0.998487	0.999546	0.999412	1.00305	1.00681		-4.43667	-1.90525	-0.743448	0.811173	-5.50114	-4.71904	-1.44881
488	15439	AA237115	haptoglobin	Hp	1	0.951655	0.964107	0.896937	1.02342	0.85183	0.796946	0.73744		-4.8059	-5.48029	-1.03268	-3.45035	0.876093	0.995844	0.999987
489	11651	AA237366	thymoma viral proto-oncogene 1	Akt1	1	0.915726	0.941217	0.93741	1.18777	1.12984	1.17255	1.05357		-3.37237	-3.60512	-4.36993	0.896376	-5.43257	0.748651	-5.40901
490		AA244638			1	0.756992	0.851965	0.975653	1.02507	1.12515	0.996864	1.00743		0.981163	0.930049	-4.88874	-2.58682	-1.25134	-3.01866	-5.48029
491	68117	AA250107	RIKEN cDNA 9430083G14 gene	9430083G14Rik	1	0.991285	0.927716	1.068	0.90275	1.10465	1.26633	1.19108		-4.12662	-5.43257	-1.76097	-4.53419	-1.48258	0.966609	0.418261
492	16325	AA242421	inhibin beta-C	Inhbc	1	0.988614	0.935242	1.11783	0.839593	0.830114	1.04361	0.805126		-2.90046	-0.743448	-5.36896	-2.58682	0.486869	-5.36896	0.98223
493	229905	AA245984	cDNA sequence BC037135	BC037135	1	0.909737	0.936049	0.810377	1.05235	1.10708	1.13185	1.15707		-4.36993	-1.83271	0.918011	-4.36993	-2.47036	-1.382	-0.143876
494	73078	AA244687	RIKEN cDNA 3110004O18 gene	3110004O18Rik	1	0.953983	0.963886	0.924104	1.19262	1.08247	1.1236	1.10319		-4.83397	-5.30698	0.381223	0.997792	-4.46953	0.806548	-4.23264
495	234664	AA250151	amyloid beta precursor protein binding protein 1	Appbp1	1	0.843161	0.75648	0.847487	1.07908	1.08036	1.21349	1.18919		0.8157	0.99911	0.99991	0.832858	-2.20251	0.882226	0.928163
496	218451	AA241859			1	1.04303	0.909537	0.660695	0.97435	1.06466	1.02436	1.04714		-2.90046	-1.9418	0.999919	-0.942997	-4.12662	-5.33918	-1.90525
497	11632	AA245324	aryl-hydrocarbon receptor-interacting protein	Aip	1	0.86903	0.904691	1.0339	1.07384	1.03904	1.0878	0.925951		0.999293	0.987149	0.999996	0.182228	-4.8059	0.999968	-0.228015
498	11972	AA239242	ATPase, H+ transporting, V0 subunit D isoform 1	Atp6v0d1	1	0.963783	1.01461	0.875591	1.13939	1.18103	1.3464	1.25845		-5.48029	-3.8332	0.866352	0.998843	0.999922	1	0.999989
499	19364	AA237779	RAD51-like 3 (S. cerevisiae)	Rad51l3	1	0.909163	0.949346	0.945154	1.02804	0.978152	0.992765	1.02194		0.796994	-4.91543	0.98223	-0.942997	-5.06522	-4.65902	-2.2784
500	20656	AA237953	superoxide dismutase 2, mitochondrial	Sod2	1	0.985277	0.924181	0.829981	1.0872	1.0335	1.14255	1.25909		-1.18755	-4.23264	0.999966	0.999723	-5.52772	0.933686	-2.50908
501	22627	AA250612	tyrosine 3-monooxygenase/tryptophan 5-monooxygenase activation protein, epsilon polypeptide	Ywhae	1	1.01747	1.03122	0.886007	1.06036	1.09748	1.24684	1.15676		0.393778	-2.31655	0.6975	0.987149	0.381223	0.999971	0.972609
502	18669	AA239727	ATP-binding cassette, sub-family B (MDR/TAP), member 1B	Abcb1b	1	0.917672	0.909567	0.880184	0.981343	0.993226	1.08057	0.975522		-5.23545	0.95076	0.999907	-4.99258	-4.05463	-1.09383	-3.98168
503	109900	AA239933	argininosuccinate lyase	Asl	1	0.951699	0.883756	0.929466	0.968594	0.836219	0.609113	0.784236		-5.51974	-3.79559	0.76019	-5.11105	0.997929	1	0.999997
504	218490	AA238461	basic transcription factor 3	Btf3	1	0.92361	1.01798	1.03181	1.0481	1.22449	1.30121	1.2199		-5.33918	-3.98168	-5.51974	-0.799061	0.890912	0.98223	0.368457
505	16418	AA253664	integrin beta 4 binding protein	Itgb4bp	1	0.876936	0.8711	1.09929	1.0168	1.57894	1.75922	1.63611		0.985532	0.771261	-4.43667	0.418261	1	1	1
506	11468	AA220739	actin, gamma 2, smooth muscle, enteric	Actg2	1	0.836002	0.799531	0.896474	1.06152	0.75501	1.26733	1.23264		0.974128	0.24367	0.824466	-2.05254	-5.50114	0.999999	0.947995
507	16976	AA253890	low density lipoprotein receptor-related protein associated protein 1	Lrpap1	1	1.02206	0.840523	1.05661	0.987973	1.1938	1.17269	1.17065		-0.855798	0.748651	-5.0173	-5.17575	0.999999	0.999999	0.999999
508		AA220113			1	0.865032	0.913775	1.00984	1.21697	1.30752	1.53345	1.31342		0.998639	0.896376	-5.52506	0.999994	1	1	1
509	11522	AA221141	alcohol dehydrogenase 1 (class I)	Adh1	1	0.99609	0.996516	0.998307	1.00375	0.999553	0.999405	1.00584		-0.36255	-0.609372	-0.58341	-0.433614	-1.21932	-1.48258	-5.11105
510	16404	AA222315	integrin alpha 7	Itga7	1	0.942978	0.755723	1.14921	0.968506	1.01443	0.84215	0.868463		0.637565	0.996217	0.976932	-2.16479	-5.35438	-1.18755	0.676112
511	20103	AA240279	ribosomal protein S5	Rps5	1	1.00843	1.02855	1.14174	1.09075	1.32451	1.27454	1.22279		-1.48258	-4.50204	-0.294023	0.999932	1	0.999999	0.999954
512	12018	AA220617	BCL2-antagonist/killer 1	Bak1	1	0.956395	1.0375	0.930961	1.28872	0.914978	1.03383	0.981937		-0.385955	-4.50204	-0.58341	0.995577	-0.0836351	-1.90525	-5.49485
513		AA230924			1	1.04435	0.986093	0.871417	1.06694	1.23982	1.33605	1.17136		-2.35483	0.406123	-4.56598	0.996447	0.983724	1	0.997792
514	21917	AA266119	thymopoietin	Tmpo	1	0.939155	1.00897	1.08772	1.16012	1.03164	1.03472	1.08494		-5.51608	0.676112	-4.40347	0.911307	-5.50678	0.765783	0.885189
515	74108	AA238652	poly(A)-specific ribonuclease (deadenylation nuclease)	Parn	1	0.942594	0.841799	1.02765	1.04886	1.0713	0.984824	0.906826		-4.05463	-0.827289	0.911307	-2.31655	-1.97854	-4.6284	-2.70401
516	67942	AA239148	ATP synthase, H+ transporting, mitochondrial F0 complex, subunit c (subunit 9), isoform 2	Atp5g2	1	0.892069	0.948569	0.961838	1.05826	1.0964	1.17274	1.15864		-1.48258	-3.33326	-5.51176	-1.62	-3.37237	-0.271742	0.765783
517	23991	AA245436	calcium and integrin binding 1 (calmyrin)	Cib1	1	0.885014	0.906067	1.00587	1.0643	1.12254	1.1692	1.09216		0.966609	0.418261	-0.0640932	0.548603	0.518564	0.970173	0.287291
518	214552	AA245628	hypothetical protein D030051D21	D030051D21	1	1.03811	0.911039	0.881511	1.12323	1.24934	1.04222	1.38291		-4.19757	-5.2542	-4.65902	-5.32338	-1.44881	-5.17575	0.548603
519	16765	AA265396	stathmin 1	Stmn1	1	0.924229	0.84918	1.27489	1.02224	1.24695	1.25573	1.29758		-2.50908	-3.75781	-1.55083	-0.316584	0.464788	0.787025	0.197947
520		AA403437			1	0.901293	0.990261	0.811187	1.16233	1.1458	1.39189	1.29769		-2.97925	-5.13316	0.84089	0.913596	0.963679	1	0.996217
521		AA261528			1	0.963938	0.893235	0.972153	1.2055	1.13879	1.30116	1.20861		0.828708	0.453455	0.133615	0.999966	0.998639	1	0.99997
522	21926	AA261175	tumor necrosis factor	Tnf	1	0.862466	0.964887	1.08212	1.21531	1.05941	0.813483	0.736568		0.368457	-1.9418	0.836918	-0.457869	-2.62581	-1.25134	-1.00251
523	56692	AA266352	mitogen-activated protein kinase kinase 1 interacting protein 1	Map2k1ip1	1	0.902382	0.827412	0.916574	1.12162	1.00378	0.937674	1.01947		0.879195	0.980035	0.99993	0.0476103	-5.06522	-3.90785	-3.90785
524	93765	AA261605	ubiquitin-conjugating enzyme E2N	Ube2n	1	1.02441	0.849561	0.838639	1.07739	1.16327	1.38613	1.28175		-3.71987	-2.78246	0.869673	0.690511	0.612601	0.999996	0.995144
525		AA266335		ESTs, Highly sim	1	1.13984	0.723873	0.72836	0.823337	1.03577	1.20204	1.09509		-1.5853	0.954652	0.787025	-1.5853	-5.36896	-1.21932	-3.60512
526	18128	AA265694	Notch gene homolog 1 (Drosophila)	Notch1	1	0.994837	0.991958	0.933371	1.43968	1.93964	2.69946	2.61674		-3.37237	-5.45359	-2.66488	1	1	1	1
527	269846	AA265714	T-cell receptor beta, variable 13	Tcrb-V13	1	0.875625	0.814719	1.03691	0.994644	1.05504	1.02583	1.05909		-5.52772	0.381223	0.996096	-2.39322	-3.68176	-2.05254	-4.30189
528	18044	AA261057	nuclear transcription factor-Y alpha	Nfya	1	0.944929	1.0285	1.02899	1.07867	1.18736	1.13344	1.1292		-3.01866	-4.99258	-1.382	0.328867	0.999293	0.998682	0.99993
529	19158	AA267598	pleckstrin homology, Sec7 and coiled-coil domains 2	Pscd2	1	0.8603	0.887912	1.04324	0.842695	1.15275	1.21914	1.09339		0.801822	-4.26741	-0.771113	0.418261	-2.74321	0.95209	0.704352
530	18005	AA268349	NIMA (never in mitosis gene a)-related expressed kinase 2	Nek2	1	0.83072	0.952263	1.18319	1.1131	1.18695	1.5331	1.38783		0.653432	-5.47204	-3.45035	0.342281	0.704352	0.99999	0.999943
531	11841	AA266938	ADP-ribosylation factor 2	Arf2	1	0.926231	0.827092	1.17853	1.03608	0.981623	1.06132	0.969215		0.612601	0.993781	-0.433614	-1.00251	0.882226	0.9913	-0.0836351
532	12211	AA260747	baculoviral IAP repeat-containing 6	Birc6	1	0.833816	0.835972	0.914624	1.08218	1.1039	1.24831	1.18038		0.999542	0.972609	-0.799061	-0.0448181	0.717654	0.993587	0.999816
533	14163	AA272942	FYVE, RhoGEF and PH domain containing 1	Fgd1	1	1.0527	0.922347	1.06338	0.955201	0.966635	1.14437	1.00159		-4.26741	0.464788	-4.50204	0.960511	-0.228015	1	-1.03268
534	19699	AA268883	reelin	Reln	1	0.97984	1.03304	1.09651	1.39707	1.27088	1.48248	1.20353		0.475925	-4.43667	-2.12721	1	1	1	1
535	16403	AA270921	integrin alpha 6	Itga6	1	0.971775	0.83122	1.13576	1.01318	1.00722	1.12852	1.12216		-4.74843	0.595155	0.406123	-3.25484	-2.50908	0.9913	-0.409643
536	59043	AA259925	expressed sequence AA673511	AA673511	1	0.902795	0.943143	0.895596	1.03735	0.999076	1.09737	1.10762		0.982742	0.166268	0.567739	0.953387	-1.34896	0.668699	-2.66488
537	16324	AA269776	inhibin beta-B	Inhbb	1	1.02449	1.00546	1.06768	1.36238	0.9925	0.828551	0.614967		-5.52772	-3.09748	-3.75781	-1.9418	-4.91543	-5.49485	0.730431
538	19766	AA269857	receptor (TNFRSF)-interacting serine-threonine kinase 1	Ripk1	1	1.00481	0.896496	0.978541	1.0448	1.47446	1.88472	2.27406		-5.15473	-0.635619	-0.482408	0.832858	0.999999	1	1
539	67100	AA270017			1	1.03765	0.933945	0.994039	1.16117	0.974989	0.96262	0.99178		-1.21932	-0.609372	-0.294023	-3.79559	-0.884586	-5.19621	-5.0173
540	69742	AA269940	RIKEN cDNA 2410018G23 gene	2410018G23Rik	1	0.918049	0.988308	1.01154	1.02184	1.10789	1.18438	1.26063		-2.43174	-1.62	-1.382	0.53877	0.771261	0.996447	0.999952
541	26417	AA270930	mitogen activated protein kinase 3	Mapk3	1	0.825454	0.923549	1.14876	1.06354	1.0607	1.01508	0.999584		0.9985	-0.942997	0.577047	0.612601	-1.18755	-0.635619	-1.72541
542	19275	AA260000	protein tyrosine phosphatase, receptor type, N	Ptprn	1	0.882302	0.893225	0.983909	1.12261	1.2185	1.2675	1.096		0.998594	0.986364	0.999952	0.988594	1	1	1
543	17762	AA274904	microtubule-associated protein tau	Mapt	1	0.902722	0.880851	0.961402	1.06645	1.04041	1.21771	1.16452		0.711069	-0.0836351	0.986364	0.76019	0.85948	0.999922	0.98223
544	66706	AA274987	RIKEN cDNA 4733401H18 gene	4733401H18Rik	1	0.925682	0.939303	0.99879	1.13036	1.27201	1.21847	1.02698		0.913596	0.717654	0.989883	0.924249	0.999949	1	0.999855
545	14208	AA271895	protein phosphatase 1G (formerly 2C), magnesium-dependent, gamma isoform	Ppm1g	1	0.848346	0.778124	1.08691	1.1201	1.08083	1.00891	0.920241		0.997492	0.994153	0.999962	0.24367	0.796994	0.24367	-5.23545
546	73274	AA272124	RIKEN cDNA 1700034P14 gene	1700034P14Rik	1	0.911919	0.822018	0.859807	0.965721	0.895668	0.852227	0.907175		-0.164499	0.996447	0.999542	-4.65902	-2.47036	0.736628	0.855926
547	68292	AA277846	RIKEN cDNA 1300006C19 gene	1300006C19Rik	1	1.10671	0.898858	0.88045	1.04288	0.914386	1.21162	1.14447		-1.00251	-0.249739	-0.385955	0.965658	-2.86109	0.899013	-4.33607
548	17995	AA277555	NADH dehydrogenase (ubiquinone) flavoprotein 1	Ndufv1	1	1.07211	0.656739	0.997242	1.07124	1.16659	1.19332	1.06732		-4.56598	-1.25134	0.946559	0.890912	-2.97925	0.518564	-3.45035
549	192159	AA277696	pre-mRNA processing factor 8	Prpf8	1	1.00089	0.986791	0.899452	1.03487	0.91353	0.94259	0.858268		-4.36993	-4.16223	0.949395	-5.50114	0.0114219	-3.79559	0.992057
550	12894	AA277495	carnitine palmitoyltransferase 1a, liver	Cpt1a	1	0.844687	0.903711	0.661571	0.764961	0.961524	0.90663	0.995783		0.882226	-2.05254	0.999741	0.974128	-3.13687	0.95076	-1.34896
551	26443	AA271066	proteasome (prosome, macropain) subunit, alpha type 6	Psma6	1	0.928801	0.873827	0.760681	0.927435	0.969468	0.952312	1.1517		-5.0884	0.978224	1	-2.43174	0.24367	0.964682	-2.82176
552	97165	AA275111	high mobility group box 2	Hmgb2	1	1.01225	0.763359	0.932605	0.977883	1.19899	1.51547	1.75836		-0.771113	-0.0640932	0.464788	-3.4892	-2.39322	0.999995	1
553	12772	AA289476	chemokine (C-C) receptor 2	Ccr2	1	0.860733	0.863464	0.994678	0.813636	1.07681	1.17553	1.17822		0.876093	-4.6284	0.82013	0.899013	-5.50114	-0.164499	0.676112
554	16792	AA288513	lysosomal-associated protein transmembrane 5	Laptm5	1	0.894365	0.971271	0.97876	1.10701	1.02343	1.19785	1.00117		0.711069	-4.50204	-0.123525	0.441925	-3.87062	0.993182	0.987892
555	18082	AA261261	4-nitrophenylphosphatase domain and non-neuronal SNAP25-like protein homolog 1 (C. elegans)	Nipsnap1	1	1.01437	0.927561	1.0357	1.03771	1.1308	1.14363	1.11128		-3.4892	-0.339426	0.6975	-2.93985	0.637565	0.996557	-1.5853
556	11430	AA261287	acyl-Coenzyme A oxidase 1, palmitoyl	Acox1	1	0.960097	0.972558	0.823363	1.0576	0.851513	0.90569	0.905825		-5.40901	-3.90785	0.906563	-2.54791	0.947995	0.998179	0.994153
557	15369	AA274811	heme oxygenase (decycling) 2	Hmox2	1	0.959495	0.906057	0.82547	0.979666	1.07402	1.10966	1.03514		-5.0173	-0.688966	0.852291	-3.64351	-3.13687	0.166268	-5.50678
558	17966	AA270187	neighbor of Brca1 gene 1	Nbr1	1	0.887479	0.807943	0.79771	1.02626	0.856422	0.911504	0.881254		-0.557733	0.999421	0.996664	-2.39322	0.908963	0.985954	0.999999
559	53328	AA288129	progesterone receptor membrane component 1	Pgrmc1	1	1.03391	0.958821	0.957052	1.1085	1.06997	1.13987	1.08724		-1.9418	-2.93985	-3.68176	0.959398	-1.79674	0.955885	-4.50204
560	27632	AA290538	RD RNA-binding protein	Rdbp	1	1.02879	0.965798	1.01572	1.14431	0.953067	0.984285	0.949347		-2.01545	0.558258	-0.827289	0.999809	-3.4892	0.60396	0.93189
561	14663	AA288467	glycosylation dependent cell adhesion molecule 1	Glycam1	1	1.05207	0.85774	0.916064	0.85222	0.899586	1.068	1.04937		-0.271742	0.911307	0.989883	-5.52506	-5.52273	-5.51176	-3.52796
562	19216	AA396341	prostaglandin E receptor 1 (subtype EP1)	Ptger1	1	0.940843	1.01169	0.851208	1.27924	1.0448	1.15299	1.07894		0.879195	-0.827289	-4.30189	0.945087	-1.1248	0.997862	0.999996
563	11566	AA388461	adenylosuccinate synthetase 2, non muscle	Adss2	1	0.915057	0.825521	1.01973	1.15744	1.01573	0.86554	0.926298		-5.50678	0.368457	0.548603	-4.30189	-3.71987	-1.34896	-2.62581
564	14210	AA388985	fibroblast growth factor inducible 15	Fin15	1	0.962322	0.835838	1.11836	1.00704	0.99321	0.952224	0.912118		-5.27238	0.441925	0.676112	-5.52805	-5.11105	-3.52796	-4.96735
565	12494	AA472876	CD38 antigen	Cd38	1	0.914523	0.960414	0.911809	1.15019	1.15581	1.19539	1.10492		-1.00251	-0.58341	0.844775	0.997152	0.967536	0.998179	0.166268
566	20182	AA289135	retinoid X receptor beta	Rxrb	1	0.906255	0.791149	0.906049	0.986484	1.13213	1.1102	1.08283		-1.44881	0.999927	0.984653	-5.52772	0.980606	-0.36255	-5.0173
567	26411	AA288220	mitogen activated protein kinase kinase kinase kinase 1	Map4k1	1	0.884199	0.917228	0.822548	1.22636	1.06041	1.07338	1.15315		0.901589	0.717654	0.994833	0.999975	0.418261	0.855926	-1.65492
568	15247	AA389935	hippocampus abundant gene transcript 1	Hiat1	1	0.879413	0.847786	0.771924	0.924606	1.04266	1.04643	1.09484		-2.05254	0.996966	0.999855	-1.65492	-3.90785	-5.2542	-5.50678
569	19362	AA386769	RAD51 associated protein 1	Rad51ap1	1	0.951523	0.799653	0.976376	1.02702	0.96604	1.21218	1.30296		0.824466	0.518564	0.999571	0.999945	-1.72541	0.990474	0.976932
570	57294	AA274176	ribosomal protein S27	Rps27	1	0.920533	1.0299	0.90215	1.21693	1.1692	1.29764	1.23727		-0.942997	-1.9418	-1.31617	0.862954	0.287291	0.975568	0.996557
571	19384	AA271948	RAN, member RAS oncogene family	Ran	1	1.01504	0.935024	0.858869	1.4429	1.16702	1.48545	1.42708		-3.64351	-1.48258	-3.75781	1	0.99993	1	0.999997
572	13688	AA272186	eukaryotic translation initiation factor 4E binding protein 2	Eif4ebp2	1	0.962552	0.709254	0.941227	1.08017	1.0587	1.05698	1.0835		-1.09383	-3.09748	0.964682	0.528758	-4.43667	-4.40347	-0.913653
573	268656	AA386799	serine palmitoyltransferase, long chain base subunit 1	Sptlc1	1	0.940135	0.986268	1.0527	1.25113	0.942625	0.845419	0.738287		-5.21611	-2.74321	0.776627	-3.98168	-5.39628	-4.88874	0.548603
574		AA386718			1	0.955303	0.9377	0.868151	1.01545	1.10635	1.19036	1.24188		-4.23264	0.76019	0.999998	0.558258	0.987526	0.999967	1
575	14177	AA387563	fibroblast growth factor 6	Fgf6	1	1.10485	1.08374	0.976008	1.25889	0.947544	0.758225	0.644266		-5.52506	-4.09075	0.355477	0.150064	-2.35483	-0.662151	0.955885
576		AA387675			1	0.999998	0.910085	1.0126	0.953813	1.08686	1.07772	1.11458		-5.48029	0.996768	0.998682	-4.30189	-0.0258082	0.999018	0.999943
577	18764	AA275686	polycystic kidney disease 2	Pkd2	1	1.14934	1.00072	0.857259	0.797181	0.94935	0.909947	1.23676		-2.97925	0.998548	0.776627	0.430194	-3.13687	-3.79559	-0.123525
578	56550	AA276008	ubiquitin-conjugating enzyme E2D 2	Ube2d2	1	0.88054	0.804463	0.851403	0.953571	1.04716	1.22132	1.52666		-0.482408	0.836918	-5.52672	0.771261	-4.19757	0.967536	0.999967
579	16186	AA274104	interleukin 2 receptor, gamma chain	Il2rg	1	0.896604	0.893886	1.06351	0.840315	0.914706	1.18841	1.09803		-1.51659	-2.47036	-4.19757	0.85948	-1.1248	0.981163	-1.79674
580	12505	AA273296	CD44 antigen	Cd44	1	0.82983	0.989673	1.03683	1.01652	0.896513	1.2481	1.03033		-1.382	-4.99258	-3.52796	-4.26741	0.792062	0.518564	-4.74843
581	14933	AA275564	glycerol kinase	Gyk	1	1.05738	0.788289	0.890381	0.912973	1.00134	1.19455	1.16313		0.182228	0.866352	-4.05463	-2.93985	-5.43257	-1.5853	-5.43257
582	20657	AA276287	superoxide dismutase 3, extracellular	Sod3	1	0.900991	0.760559	0.95403	1.05945	1.03625	1.02859	1.21071		-0.0448181	0.787025	0.796994	-0.433614	-2.82176	-3.79559	-2.2784
583	21802	AA276915	transforming growth factor alpha	Tgfa	1	0.858041	0.749612	1.12144	0.982329	1.20896	1.27916	1.50619		-2.31655	0.997327	-4.26741	-5.52506	0.999782	0.99951	0.999839
584		AA276721			1	0.848313	0.754032	0.866312	0.988037	0.953995	1.11163	1.03896		-3.52796	0.933686	0.92623	-4.77738	-4.96735	-1.9418	-5.47204
585	12550	AA276110	cadherin 1	Cdh1	1	0.933064	0.836784	1.04316	0.975872	0.947139	1.09347	1.03458		-9.34519	0.371583	-1.67997	-8.9527	-0.880927	-8.16726	-9.28261
586	70628	AA276213			1	0.802898	0.885139	1.04078	1.01545	0.89594	1.12037	1.2353		0.998762	0.508918	0.889005	-2.9932	-9.31569	0.967389	0.963396
587	19701	AA276457	renin 1 structural	Ren1	1	0.761227	0.648216	1.25244	1.03013	1.19055	1.06585	1.13571		-0.483106	0.998281	0.962329	-1.27479	-5.99979	-9.31569	0.591731
588	231086	AA286024	hydroxyacyl-Coenzyme A dehydrogenase/3-ketoacyl-Coenzyme A thiolase/enoyl-Coenzyme A hydratase (trifunctional protein), beta subunit	Hadhb	1	0.927531	0.990888	0.749704	1.09157	0.957383	1.37725	1.15884		-2.88565	-6.24605	0.645562	-5.25155	-5.50168	0.994537	0.992759
589	15078	AA275906	H3 histone, family 3A	H3f3a	1	0.975234	0.927106	0.934734	1.01046	1.18432	1.30979	1.29044		-9.10595	-5.56417	-7.97945	-4.02172	0.866443	0.999996	0.999708
590		AA419665			1	0.974342	1.01147	0.961163	0.994633	1.01995	0.96551	1.03044		0.385294	-2.37153	-9.33254	0.765623	-9.33254	-0.815045	0.411952
591	20873	AA276998	serine/threonine kinase 18	Stk18	1	0.754351	0.72856	1.00636	1.12406	1.06574	1.17108	1.09605		-0.719458	0.955283	0.855548	-3.6099	-8.50872	-0.322923	-7.57395
592	20768	AA414662	selenophosphate synthetase 2	Sephs2	1	1.05048	1.03989	0.756597	0.987451	0.880244	0.793514	0.901698		-2.4211	-8.0274	0.948487	-9.26951	-1.43144	0.843847	0.759726
593	27058	AA413739	signal recognition particle 9	Srp9	1	1.11093	1.00809	1.01643	0.983087	1.00217	1.07177	1.21912		-0.627701	0.921868	0.808313	-0.750892	-0.248098	0.998841	0.999727
594	13663	AA413622	etoposide induced 2.4 mRNA	Ei24	1	1.04259	0.997493	0.757219	1.07571	0.904843	1.1139	1.24696		-9.31569	-6.48925	0.894776	-7.41278	-8.92386	-0.483106	-2.03649
595	12402	AA414809	Casitas B-lineage lymphoma	Cbl	1	0.944061	0.884113	0.831715	1.15211	1.1435	1.12435	1.20366		-9.26951	-5.25155	-0.0865563	-2.4211	-5.43915	-2.77964	-0.200107
596	27054	AA290021	SEC23B (S. cerevisiae)	Sec23b	1	0.945061	0.845207	0.884842	1.29073	1.05884	1.41095	1.36019		-9.00759	-2.47109	-1.51248	0.980787	-4.93954	0.973406	0.0380768
597	15404	AA388599	homeo box A7	Hoxa7	1	0.74265	0.895291	0.862553	1.01484	1.14655	1.19573	1.22854		-1.08909	-6.72846	0.93906	-7.78138	-8.34396	-0.68845	-3.38097
598	68145	AA473938	RIKEN cDNA 5730466H23 gene	5730466H23Rik	1	0.969167	0.988507	0.928857	0.956734	0.963056	1.22464	1.07548		-6.54946	-8.21251	0.0576654	-7.93086	-9.32464	-5.99979	-7.30288
599	11927	AA416325	ATX1 (antioxidant protein 1) homolog 1 (yeast)	Atox1	1	0.957697	1.13228	0.849754	1.14746	1.03136	0.911863	0.817084		0.371583	-1.72297	0.530881	-9.22406	-9.34994	-9.26951	-8.50872
600	15194	AA437749	Huntington disease gene homolog	Hdh	1	0.813625	0.874374	0.997873	1.00476	1.0791	1.24203	1.30217		-1.35221	-7.19117	-0.0226964	-6.96275	-7.93086	0.873284	0.520009
601	51788	AA466087	H2A histone family, member Z	H2afz	1	1.02258	0.966212	1.32127	0.954608	1.02435	1.10914	1.05362		-3.90273	-0.374737	0.999985	-3.49481	-0.248098	0.168424	-1.67997
602	66878	AA444950	RIO kinase 3 (yeast)	Riok3	1	0.88703	0.752809	0.883119	0.82205	1.03525	1.1589	1.26653		-9.31569	0.921868	0.817824	0.637049	-4.87734	-6.48925	-0.0865563
603	68024	AA444660	histone 1, H2bc	Hist1h2bc	1	1.08909	1.01072	1.15621	1.01155	0.927797	1.16321	1.19347		-0.248098	-5.81363	-3.84361	-9.08281	-5.81363	0.995031	0.974174
604	17311	AA403846	kit ligand	Kitl	1	0.914144	0.807458	0.895566	0.998191	0.947486	1.21977	1.28095		-5.56417	-1.01794	-2.5215	-8.0274	-1.99037	0.889005	-2.88565
605	83397	AA403828	A kinase (PRKA) anchor protein (gravin) 12	Akap12	1	1.04975	0.999546	0.880657	0.993083	0.823972	0.946895	1.28405		-8.89409	-3.04753	-9.16949	-8.69671	-5.31408	0.734787	-2.13005
606		AA433053			1	0.87574	0.889193	0.781856	0.96611	0.855697	0.97699	1.14539		-5.31408	0.974922	-0.68845	-7.88164	-4.44531	-5.43915	-7.13466
607	20449	AA423143	sialyltransferase 8 (alpha-2, 8-sialyltransferase) A	Siat8a	1	0.878707	0.810979	0.896643	0.84992	0.904087	1.25183	1.3466		-0.511204	-1.01794	0.993806	-6.42878	-9.34519	0.637049	-6.96275
608	280668	AA647124	a disintegrin and metalloproteinase domain 1a	Adam1a	1	0.774308	0.772836	0.927241	1.14925	1.11828	1.18993	1.00568		0.765623	-8.46869	0.910472	0.150752	-3.78476	-4.202	-8.86342
609	20224	AA444425	SAR1a gene homolog 1 (S. cerevisiae)	Sara1	1	0.881451	0.929049	1.05874	0.99826	1.11593	1.11734	1.26291		-5.18905	0.813123	-7.73037	-9.24023	-1.08909	0.981352	0.996818
610		AA444533			1	0.959273	0.888347	1.02553	1.07481	1.10561	1.25655	1.08068		-0.223915	0.902916	-1.94469	0.562226	-3.38097	0.999903	0.997291
611	71955	AA427055	RIKEN cDNA 2400003C14 gene	2400003C14Rik	1	0.817972	0.879225	0.977322	0.958609	1.15065	1.22435	1.37619		-1.08909	-3.38097	0.508918	-2.32238	-2.62355	0.986608	0.995759
612	69077	AA465980	proteasome (prosome, macropain) 26S subunit, non-ATPase, 11	Psmd11	1	1.23283	1.08592	1.01215	1.215	1.03245	1.17414	1.21034		-2.08305	-6.78753	-1.72297	0.987397	-8.86342	0.999837	0.998985
613		AA465987			1	1.02822	0.85946	0.711742	1.0046	0.894295	1.12266	1.21067		-0.53971	0.978994	0.793204	-7.19117	-8.66077	0.619482	-6.60941
614	66218	AA415725	NADH dehydrogenase (ubiquinone) 1 beta subcomplex, 9	Ndufb9	1	0.95057	0.998919	0.976894	0.970417	0.967509	0.988962	1.00053		-8.07469	-4.56804	-8.54796	-6.78753	-8.66077	-9.24023	-4.62964
615	26400	AA451434	mitogen activated protein kinase kinase 7	Map2k7	1	0.92577	0.838043	0.935801	1.12154	1.04338	1.31112	1.21204		-3.26844	0.982953	0.931907	0.54154	-0.948552	0.999987	0.990722
616	56615	AA433516	microsomal glutathione S-transferase 1	Mgst1	1	1.07802	1.11466	0.827116	0.991639	1.12063	1.02805	1.12358		-4.75325	-7.19117	-4.02172	0.992759	-1.31327	-3.90273	-6.72846
617	68349	AA422241	NADH dehydrogenase (ubiquinone) Fe-S protein 3	Ndufs3	1	1.12479	0.963773	0.781044	0.916694	1.03384	1.23528	1.09269		-4.56804	-8.16726	0.999831	-9.24023	-0.483106	0.971803	0.917481
618	16149	AA419750	Ia-associated invariant chain	Ii	1	1.14394	0.94647	1.01708	1.00851	0.879887	1.10066	1.40175		-4.3842	-8.16726	-9.12812	-7.46701	-9.24023	-1.63742	0.114474
619	30963	AA419741	protein tyrosine phosphatase-like (proline instead of catalytic arginine), member a	Ptpla	1	1.06288	0.783585	0.686638	0.971331	0.969086	1.23515	1.08571		-2.17748	0.990132	0.520009	-7.52073	-1.35221	-2.13005	-8.12132
620	19228	AA575668	parathyroid hormone receptor 1	Pthr1	1	1.12474	1.17858	1.12713	1.26067	0.995077	1.13613	1.03692		0.628357	0.202851	-7.57395	0.859267	-9.28261	-0.0865563	-2.83245
621	18399	AA575680	solute carrier family 22 (organic anion transporter), member 6	Slc22a6	1	0.983951	0.889526	0.909202	0.961169	1.02081	1.06356	1.20801		-0.0226964	-4.08159	0.591731	-9.31569	-9.26951	-0.0226964	-2.9932
622	12450	AA458196	cyclin G1	Ccng1	1	0.854595	0.832438	0.968194	0.963638	1.04285	0.981979	0.961061		-0.0436354	0.984885	0.996714	-9.31569	-7.67878	-6.96275	-4.93954
623	16923	AA451423	linker of T-cell receptor pathways	Lnk	1	0.889053	0.751833	0.909088	0.919758	1.11257	1.20835	1.24283		-5.18905	0.99253	0.93906	-9.29467	-6.36809	-1.27479	0.879802
624	13645	AI098350	epidermal growth factor	Egf	1	0.863726	0.831192	0.842321	1.02207	0.983124	1.25356	1.36707		-5.06417	-1.85466	0.798355	-7.78138	-8.69671	-3.26844	-3.6099
625	20686	AA444790	sperm autoantigenic protein 17	Spa17	1	0.855456	0.759736	1.00615	0.90946	0.917045	1.04945	1.06932		0.662062	0.999364	-1.67997	-2.47109	-7.67878	-9.3057	-9.28261
626	13723	AA450836	embigin	Emb	1	0.952388	0.816029	1.00253	0.995307	1.00591	1.05405	1.11323		-6.66908	-1.19916	-2.77964	-5.50168	-9.00759	-8.83184	-2.9932
627	67130	AA462323	NADH dehydrogenase (ubiquinone) 1 alpha subcomplex, 6 (B14)	Ndufa6	1	0.969901	1.05241	1.03234	0.985175	1.00285	1.0844	1.0821		-9.0587	-1.59532	-6.54946	-1.01794	0.855548	-0.0021005	0.917481
628	54381	AA475930	RIKEN cDNA 1190003P12 gene	1190003P12Rik	1	0.949164	0.932332	0.937774	0.933509	0.995765	0.98101	1.17394		-8.30087	-2.67518	-8.73179	-7.52073	-6.54946	-0.483106	-8.62399
629	24128	AA475568	5'-3' exoribonuclease 2	Xrn2	1	1.04764	0.786587	0.973489	0.888903	1.04122	1.23267	1.21218		-5.81363	0.996266	0.202851	-2.17748	0.462313	0.987397	0.945508
630	11804	AA475422	amyloid beta (A4) precursor-like protein 2	Aplp2	1	1.05792	0.961557	0.929761	1.15934	1.13863	1.12786	1.21455		-5.00182	-1.89945	-3.21269	0.385294	-5.81363	0.999575	0.93
631	69263	AA607457	replication factor C (activator 1) 3	Rfc3	1	0.928436	0.863267	1.27959	1.06556	1.06268	1.00184	0.912457		-5.37662	-7.02044	0.114474	-4.50659	-3.21269	-0.297599	-0.176669
632	22687	AA051554	zinc finger protein 259	Zfp259	1	0.738014	1.04991	0.956248	1.25684	1.17731	1.06386	1.26843		0.999603	-1.3916	0.474308	-1.08909	0.974922	0.999081	1
633	11951	AA139793	ATP synthase, H+ transporting, mitochondrial F0 complex, subunit c (subunit 9), isoform 1	Atp5g1	1	0.842244	0.944087	1.01111	1.1082	1.10018	1.15959	1.20022		-5.56417	-5.25155	-7.07775	-1.63742	0.822417	0.777029	0.958948
634		AA271505			1	1.00391	1.0034	0.901494	1.02469	1.1171	1.05465	0.988015		-9.32464	-1.27479	-0.948552	-5.18905	-8.69671	0.0769254	0.508918
635	22702	AA607102	zinc finger protein 42	Zfp42	1		0.913585	0.868639	0.967555	1.20976	1.15061	1.16881		-3.38097	-2.9932	-5.50168	-5.93785	-2.13005	-3.32454	-1.01794
636	17393	AI316399	matrix metalloproteinase 7	Mmp7	1	0.959208	0.726398	1.08047	1.1993	1.09133	0.956283	0.813699		0.252256	0.728202	0.693039	-9.00759	-9.3057	-8.76602	-1.51248
637	21333	AA982788	tachykinin 1	Tac1	1	0.809439	0.753935	0.937981	1.00597	1.12308	1.06013	0.990044		0.450084	0.734787	-0.627701	-7.13466	-8.62399	-8.76602	-9.16949
638	14202	AI173197	four and a half LIM domains 4	Fhl4	1	1.14419	0.811021	0.908632	0.856144	0.870907	1.23121	1.12		-0.455414	0.956538	-0.223915	-6.96275	-3.5522	-0.627701	-3.49481
639	69980	AI173214			1	0.861366	0.890581	0.94095	1.44625	1.06719	0.897722	0.664039		-5.50168	0.765623	0.988142	-3.26844	-8.92386	-9.33939	-8.92386
640	13430	AI156587	dynamin 2	Dnm2	1	0.87847	0.897548	0.908813	1.29597	0.994996	0.926624	0.756053		0.0958604	0.219614	0.935576	-2.72721	-9.29467	-8.58638	-0.348635
641	11723	AI037706	amylase 2, pancreatic	Amy2	1	1.03452	0.772332	0.823783	0.827557	0.92438	1.14332	1.19752		-0.948552	0.999936	0.980787	-8.76602	-9.0587	0.371583	0.497607
642	12585	AI385804	cerebellar degeneration-related 2	Cdr2	1	0.939954	0.951401	0.927652	0.915382	1.11799	1.26027	1.28187		-9.34519	-7.78138	0.462313	-8.62399	-7.57395	-2.22535	0.931907
643	16330	AA289577	inositol polyphosphate-5-phosphatase B	Inpp5b	1	0.818584	0.914327	1.00518	1.11925	1.05017	0.945278	1.03343		0.0769254	0.670055	0.93	-9.32464	-1.89945	-9.35628	-6.72846
644		3xSSC			1	1.03139	0.864868	0.762127	1.09245	0.972835	1.19765	1.05922		-5.37662	-8.69671	0.822417	-6.30717	-9.35628	-6.36809	-2.88565
645		3xSSC			1	0.934025	0.820953	0.816859	0.908557	1.15708	1.31497	1.37158		-7.78138	0.747532	0.985335	-8.30087	0.474308	0.886012	0.915203
646		3xSSC			1	0.832241	0.795195	0.861647	0.924112	1.1533	1.27791	1.22388		0.219614	0.976356	0.998841	-8.73179	-3.78476	-1.59532	0.999405
647	381323	AU050846	similar to 60S ribosomal protein L18a	na	1	1.05325	1.14567	1.095	1.29191	1.13856	1.29546	1.21943		0.520009	-9.22406	-9.26951	0.999754	0.999998	0.999946	0.999997
648	20755	AI596101	small proline-rich protein 2A	Sprr2a	1	0.942569	0.967936	1.13922	1.19181	1.15808	1.02451	1.05222		-2.32238	-2.9932	-1.94469	0.969227	0.970968	0.520009	0.869905
649	15135	AV005302	hemoglobin Y, beta-like embryonic chain	Hbb-y	1	0.894446	0.92055	1.03715	0.981676	0.97752	1.02101	1.09968		-2.32238	-4.02172	-7.52073	-9.10595	-9.35786	-9.03362	-5.37662
650	17283	AW321532	multiple endocrine neoplasia 1	Men1	1	0.907775	0.793173	1.06318	0.83034	0.911604	0.935533	0.942865		-4.50659	0.782543	-6.36809	0.693039	0.486071	-4.87734	-4.14168
651	51798	AA667410	enoyl coenzyme A hydratase 1, peroxisomal	Ech1	1	0.917674	0.770481	0.969468	0.913743	1.09766	1.32198	1.1648		-6.66908	0.835574	-0.322923	-4.26253	-3.26844	0.891926	-0.374737
652	15135	W29631	hemoglobin Y, beta-like embryonic chain	Hbb-y	1	0.918228	0.878722	0.992382	1.01827	1.01483	1.1617	1.41232		-4.56804	-5.56417	-6.12324	-8.69671	-9.10595	-4.32327	-0.0226964
653	28077	AL034823	DNA segment, Chr 13, Wayne State University 50, expressed	D13Wsu50e	1	0.901292	0.832949	0.999387	1.02432	1.07687	1.32404	1.23251		-2.5215	0.999698	-4.32327	-3.21269	0.54154	1	0.999999
654	77067	AA143951	RIKEN cDNA 5930434B04 gene	5930434B04Rik	1	0.933024	1.04425	0.964478	1.21383	1.228	1.3012	1.39208		0.931907	0.902916	-3.9621	0.999997	1	1	1
655	66616	AI155753	sorting nexin 9	Snx9	1	1.00578	0.992858	1.0354	1.04396	1.29037	1.29478	1.43468		-1.47173	-7.97945	0.437616	-5.12659	0.999981	0.999998	1
656	66616	AI155753	sorting nexin 9	Snx9	1	0.924182	1.10953	1.00561	0.966976	1.06091	0.981455	1.02746		-2.5215	-4.69138	-5.93785	-8.58638	-6.60941	-8.12132	0.219614
657	68052	AA051755	ribosomal protein S13	Rps13	1	0.896303	1.08705	1.13483	1.07513	1.31954	1.3421	1.41752		0.965447	-9.12812	-9.35786	0.935576	1	1	1
658	12317	W44140	calreticulin	Calr	1	0.986119	0.867589	0.790193	0.980279	1.01415	1.04236	1.0149		-9.0587	0.945508	-3.10222	-3.84361	-6.84628	-9.08281	-7.30288
659	15904	AA008963	inhibitor of DNA binding 4	Idb4	1	0.978179	0.859529	1.04616	1.00062	1.06915	1.15585	1.3549		-9.35786	-3.32454	-3.84361	-7.73037	-9.33939	0.34338	0.905497
660	66481	AA832666	RIKEN cDNA 2410030A14 gene	2410030A14Rik	1	0.821422	0.970671	1.07329	1.27352	1.25938	1.29907	1.16994		0.980787	-9.34519	-6.78753	0.971803	0.998588	0.999921	0.999999
661		W83976			1	0.839695	0.893459	1.01145	1.27879	1.0418	1.23522	1.393		-5.12659	-3.72619	-8.34396	0.747532	0.826905	0.998802	0.999988
662		W64037			1	0.737238	0.816479	0.892537	0.994212	1.08155	1.19291	1.17575		0.999561	0.969227	0.996919	-1.89945	-9.03362	-1.99037	0.961232
663	20377	AW011917	secreted frizzled-related sequence protein 1	Sfrp1	1	0.903126	0.690945	0.853632	0.991391	1.02486	1.35624	1.34416		-1.05329	0.999961	0.996919	-0.176669	-9.1493	0.990431	-1.72297
664		AA607397			1	0.919044	1.10871	0.956223	1.1721	1.25811	1.10833	1.34215		-0.68845	-1.12533	-8.9527	0.843847	0.808313	0.32888	0.822417
665	60409	AA250067	trafficking protein particle complex 4	Trappc4	1	0.944199	0.885998	0.818081	1.16274	1.21598	1.12898	1.38853		0.84784	0.653899	0.988845	0.999342	0.998165	0.999997	1
666	53319	AA125156	nuclear RNA export factor 1 homolog (S. cerevisiae)	Nxf1	1	0.86261	0.885179	0.948084	1.01623	1.07135	1.12492	1.31292		0.984885	0.94992	0.997619	-8.0274	-0.428123	0.999944	0.99998
667	69871	AA041846	RIKEN cDNA 2010007H12 gene	2010007H12Rik	1	0.892174	0.839748	0.810423	1.11805	1.34667	1.08775	1.45869		0.808313	0.996266	0.462313	0.299066	1	0.994537	1
668		T43360			1	0.861307	0.822649	0.942056	1.06825	1.11573	1.14766	1.27808		-2.4211	0.462313	0.803391	-1.63742	-2.17748	-4.02172	0.876583
669		T21166			1	0.83855	0.913089	1.05908	1.04833	0.946833	1.11974	1.18003		0.0769254	-5.37662	-5.62663	-2.62355	-7.07775	-9.1493	0.236081
670		AF124205			1	1.01506	0.793416	0.886648	0.860141	1.00549	1.26868	1.31723		-8.50872	0.999896	0.93906	-1.89945	-2.9932	0.114474	0.637049
671		M33419			1	1.03022	0.882796	0.649876	1.19616	0.935579	1.20101	1.21268		-2.93924	0.450084	0.999272	-0.455414	-0.68845	-1.55367	0.0769254
672		M36771			1	0.784801	0.938591	0.789343	1.08083	1.19622	1.27194	1.22625		-1.99037	-1.43144	0.99948	-1.81031	0.54154	0.782543	0.945508
673	19084	AA537355	protein kinase, cAMP dependent regulatory, type I, alpha	Prkar1a	1	0.914623	0.908411	1.00317	0.96579	1.13302	1.26777	1.23118		-3.9621	0.0769254	-9.35628	-5.81363	0.998442	1	0.999884
674	19124	AA672430	protein C receptor, endothelial	Procr	1	0.785123	0.792352	1.17005	0.931978	1.07765	1.03806	1.18629		0.999958	0.99988	0.988498	-7.62664	-0.847769	0.462313	0.995622
675	18746	AA636642	pyruvate kinase, muscle	Pkm2	1	1.03399	0.90315	1.00407	1.11833	1.06501	1.35856	1.19788		-8.30087	0.953995	-2.77964	-3.43773	1	1	0.999986
676	67117	AA636653	t-complex-associated-testis-expressed 1-like	Tcte1l	1	1.00346	0.726756	0.869915	0.90063	1.01	1.15141	1.08465		-8.9527	0.923979	-3.21269	-7.19117	-9.03362	-4.44531	-8.54796
677		AA823833			1	1.00311	0.826372	0.872042	0.957187	1.09821	1.29464	1.17213		-6.72846	0.994363	0.721471	-4.02172	-0.847769	0.99997	0.803391
678	20068	AI225433	ribosomal protein S17	Rps17	1	0.876996	0.984092	0.928116	1.26017	1.20045	1.17042	1.2163		0.808313	-4.44531	-9.18869	0.999999	0.998224	0.955283	0.985771
679	15425	W33293	homeo box C6	Hoxc6	1	0.925141	0.798482	1.10638	1.06184	0.989747	1.04062	1.0566		-1.63742	0.99602	-9.34994	-7.57395	-3.90273	0.84784	-4.81524
680	18582	W45989	phosphodiesterase 6D, cGMP-specific, rod, delta	Pde6d	1	0.932398	0.87556	1.01565	0.929222	0.89616	1.05064	1.01852		-2.08305	-0.130891	-1.27479	-5.62663	0.551987	-8.62399	-5.75137
681		W48168			1	1.04356	0.845774	1.02575	1.23181	1.25017	1.456	1.31029		0.873284	0.998104	0.747532	1	1	1	0.999993
682	19730	W48230	ral guanine nucleotide dissociation stimulator	Ralgds	1	0.84584	0.768402	1.30742	1.04065	1.01858	0.861196	0.854937		-0.0865563	-0.248098	0.582095	-3.78476	-6.48925	-8.3863	-4.44531
683	12867	W48245	cytochrome c oxidase, subunit VIIc	Cox7c	1	1.16676	0.840048	0.884043	1.07372	1.05209	0.900254	1.17748		-6.96275	-1.12533	-1.01794	-9.35786	-7.62664	-5.68903	0.385294
684	97532	AA007791	RIKEN cDNA C230084J24 gene	C230084J24Rik	1	0.985454	0.825453	0.817495	0.984493	1.04673	1.10761	1.15417		-8.30087	0.707562	-0.815045	-9.08281	-1.19916	-6.42878	-3.26844
685	12461	AA003927	chaperonin subunit 2 (beta)	Cct2	1	0.880459	0.953645	0.998025	1.22928	1.32555	1.31726	1.2391		0.721471	-4.56804	-5.31408	0.999991	0.999992	0.999993	0.999514
686	67281	AA008895	ribosomal protein L37	Rpl37	1	0.99766	1.02993	0.988179	1.16954	1.03711	0.976246	0.925898		-4.75325	-1.51248	-0.0865563	0.994871	0.728202	-2.67518	-5.37662
687	69225	AA032328	RIKEN cDNA 2810407E01 gene	2810407E01Rik	1	0.874029	0.930936	0.998505	1.08474	1.13962	1.10262	1.03195		0.943958	0.728202	0.943958	0.979609	0.34338	0.371583	-8.12132
688	67281	AA008895	ribosomal protein L37	Rpl37	1	1.02743	1.08049	0.952663	1.08826	1.00356	0.968613	0.944638		-6.06159	0.398749	0.940735	0.972615	-4.62964	-8.21251	-2.57232
689	14548	AA018028	ganglioside-induced differentiation-associated-protein 3	Gdap3	1	0.922987	0.900922	0.850365	0.984722	1.10582	1.20584	1.14875		0.721471	0.999966	0.999976	0.958948	0.67788	0.999842	0.980787
690	14972	AA017870	histocompatibility 2, K region	H2-K	1	0.991263	1.001	1.00085	1.00326	1.0012	0.999953	1.00371		-5.68903	-8.98062	-2.57232	0.283745	-7.57395	-9.16949	-3.04753
691	18626	AA051328	period homolog 1 (Drosophila)	Per1	1	0.958184	1.01851	1.01281	1.34052	0.961886	0.803921	0.635409		-4.08159	-4.56804	0.817824	-0.455414	-8.76602	-2.9932	0.474308
692	23988	AA051390	protein (peptidyl-prolyl cis/trans isomerase) NIMA-interacting 1	Pin1	1	0.886143	0.964162	1.11742	1.1639	1.13129	1.14036	1.09955		0.530881	0.54154	0.728202	0.999736	0.923979	1	0.999998
693	17714	AI385511	GrpE-like 2, mitochondrial	Grpel2	1	0.996935	0.914846	0.937997	1.09603	1.31282	1.58818	1.47871		-8.62399	-3.43773	-0.719458	-0.0226964	0.99905	1	1
694		AA073887			1	0.982692	0.866905	0.902692	0.948212	0.953688	1.11973	1.25848		-5.68903	-1.01794	-0.68845	-6.24605	-9.22406	-2.83245	0.931907
695	12895	AA061685	carnitine palmitoyltransferase 1b, muscle	Cpt1b	1	0.871336	0.906621	0.920439	0.929255	1.02281	0.926147	1.01621		-9.0587	0.185789	0.99932	-9.08281	-5.18905	0.662062	-1.43144
696	100972	AI427886	RAB28, member RAS oncogene family	Rab28	1	1.02093	0.886141	0.837939	0.860282	1.05621	1.06926	1.31269		-3.5522	0.31411	0.999863	-1.3916	-9.16949	-0.455414	0.999986
697	56691	AA066043	DnaJ (Hsp40) homolog, subfamily B, member 8	Dnajb8	1	0.925005	0.733726	1.08365	0.717653	0.988109	1.09424	1.1582		-2.83245	-2.4211	0.988845	0.919702	-6.36809	-1.99037	-8.25705
698	77605	AA039028	RIKEN cDNA C530002L11 gene	C530002L11Rik	1	0.845264	0.842194	1.21541	1.00501	1.06191	0.824762	0.884598		0.940735	0.984423	0.734787	-3.9621	-6.72846	0.437616	-1.23675
699	17896	AA051123	myosin, light polypeptide 4, alkali; atrial, embryonic	Myl4	1	0.929821	0.767393	1.32363	0.930762	0.936755	1.11239	1.11363		0.450084	0.424907	-9.10595	0.670055	-0.0865563	0.953995	-0.130891
700	319475	AA031146	RIKEN cDNA 4930488P06 gene	4930488P06Rik	1	0.756193	0.712355	1.04121	0.935632	1.21151	1.41629	1.38833		0.99977	0.999892	0.873284	-9.35786	0.826905	0.999999	1
701	18081	AA016456	ninjurin 1	Ninj1	1	1.02192	1.00458	1.01338	1.15378	1.12486	1.18974	0.964537		-8.89409	-8.62399	-6.66908	0.995759	0.299066	0.989824	-7.24725
702	19943	AA049167	ribosomal protein L28	Rpl28	1	0.969979	1.03159	1.02489	1.08748	0.983168	0.997898	0.955154		-3.43773	-9.1493	-9.18869	0.987008	-4.93954	-9.1493	-0.719458
703	16923	AI429186	linker of T-cell receptor pathways	Lnk	1	0.927871	0.984344	0.925788	0.99477	0.983834	1.12328	0.934024		-6.84628	-9.03362	-3.26844	-6.54946	0.202851	-1.05329	0.601172
704		AA108260			1	1.06319	0.924887	0.90037	1.16483	0.926521	0.935826	0.87553		-4.202	-2.9932	0.582095	0.973406	-8.92386	-0.914521	0.983947
705	26446	AA108678	proteasome (prosome, macropain) subunit, beta type 3	Psmb3	1	0.936193	0.966217	1.01261	1.12795	1.13516	1.16758	1.01448		-9.33254	-1.19916	-8.30087	0.991543	-2.57232	0.974174	-5.43915
706	22335	AA042052	voltage-dependent anion channel 3	Vdac3	1	1.00812	0.981081	0.962664	1.03621	1.03695	1.21617	1.09886		-4.32327	-0.0021005	-3.32454	0.999984	-9.35839	0.999955	0.424907
707	14718	AA060494	glutamate oxaloacetate transaminase 1, soluble	Got1	1	0.961071	0.955896	0.875448	0.784166	0.640608	0.454511	0.513062		-9.03362	-9.35628	0.862898	0.905497	1	1	1
708	20525	AA050085	solute carrier family 2 (facilitated glucose transporter), member 1	Slc2a1	1	0.895765	0.951032	1.09547	1.07881	1.06108	1.12248	1.17567		-3.6099	-8.66077	-8.46869	0.945508	-5.43915	-1.89945	0.601172
709	22365	AA060373	vacuolar protein sorting 45 (yeast)	Vps45	1	0.861048	0.786682	1.17894	1.07913	1.15062	0.932651	0.907269		0.13277	0.945508	0.998165	-2.03649	-1.43144	-8.21251	-6.18473
710	66704	AA139442	RIKEN cDNA 4921506I22 gene	4921506I22Rik	1	0.946824	1.01225	0.862131	0.995048	1.07019	1.07756	1.0587		-7.62664	-4.202	0.988498	-7.07775	-3.72619	-2.88565	-0.750892
711		AA152754			1	0.881015	0.929898	1.03156	1.14427	1.14174	1.19134	1.14437		0.966431	0.984423	0.13277	0.999976	0.999296	0.999999	0.998336
712	22144	AA144835	tubulin, alpha 3	Tuba3	1	1.1663	0.985886	0.773268	1.11228	0.962884	1.2618	1.10054		-5.93785	-0.176669	-0.153598	0.999999	-0.348635	0.997377	-3.90273
713		AA152754			1	0.897114	0.964531	0.958033	1.07598	1.19245	1.34222	1.14121		0.879802	-0.428123	0.984885	0.999081	0.999642	1	0.998336
714	28113	AA209987	Terf1 (TRF1)-interacting nuclear factor 2	Tinf2	1	0.963466	0.93865	1.1594	1.17048	0.983717	0.803435	0.693513		-0.914521	0.114474	0.93906	-3.84361	-6.60941	-7.52073	0.851739
715	12482	AA174292	membrane-spanning 4-domains, subfamily A, member 1	Ms4a1	1	0.830744	0.788468	1.25449	1.01947	0.973329	0.9212	0.95511		0.0380768	-1.94469	0.798355	-4.02172	-9.12812	-9.20688	-6.90469
716	66254	AA199274	RIKEN cDNA 1500031M22 gene	1500031M22Rik	1	1.13963	1.21609	0.994689	1.348	0.973126	0.772314	0.618454		-7.97945	-9.25538	0.591731	0.994183	-6.60941	-9.34519	0.707562
717	14083	AA146243	PTK2 protein tyrosine kinase 2	Ptk2	1	1.04214	0.850299	0.916143	0.822766	0.91083	1.07871	1.15957		-6.90469	0.572261	0.999665	-5.06417	-0.53971	-3.9621	0.0958604
718	18578	AA209984	phosphodiesterase 4B, cAMP specific	Pde4b	1	1.10254	1.05777	0.946679	1.25478	0.940037	0.753741	0.663605		-8.98062	-5.93785	0.765623	-4.50659	-9.28261	-5.87579	-3.43773
719	18039	AA253725	neurofilament, light polypeptide	Nefl	1	0.981685	0.992445	1.14569	1.26396	1.0425	0.782806	0.645959		-8.12132	-4.62964	0.84784	-3.04753	-8.50872	-2.57232	0.851739
720	242721	AA139621	RIKEN cDNA B230308G19 gene	B230308G19Rik	1	1.19253	1.21039	0.937914	1.35707	0.995264	0.786154	0.577519		-7.62664	-9.1493	-0.568626	-0.297599	-1.85466	-8.58638	-0.815045
721	18039	AA253725	neurofilament, light polypeptide	Nefl	1	0.923244	0.965847	1.16706	1.35721	1.09387	0.805904	0.667335		-5.93785	-2.83245	-6.54946	-7.57395	0.759726	-8.46869	-0.130891
722		AA124030			1	0.777638	0.906872	1.00536	0.970256	1.06133	1.14719	1.2355		0.999676	-2.4211	0.582095	-9.22406	-9.08281	0.976356	0.993609
723	67817	AA137370			1	0.918191	0.897488	1.20638	1.10454	1.22241	1.29491	1.13218		-6.54946	0.958948	0.905497	0.582095	0.999806	1	0.912867
724		AA242680			1	0.932143	0.782752	0.824132	0.988053	1.02346	1.10842	0.926529		-6.72846	0.942368	-0.914521	-9.35628	-8.69671	-6.42878	-6.24605
725		AA242192			1	0.891144	0.903591	1.09515	1.05606	0.989121	0.924277	0.831126		-1.08909	0.645562	0.826905	-7.88164	-7.93086	-8.58638	0.84784
726	14431	AA222404	guanidinoacetate methyltransferase	Gamt	1	0.920829	0.853412	0.970953	1.12275	0.998827	1.02622	0.988166		0.960105	0.978362	-1.51248	0.974174	-8.46869	-8.76602	-7.02044
727	20851	AA212445	signal transducer and activator of transcription 5B	Stat5b	1	1.03701	0.987063	1.0217	1.17215	1.03048	1.2276	1.0965		-0.657865	-6.48925	-7.67878	0.994183	-4.3842	1	0.486071
728	74104	AA212806	ATP-binding cassette, sub-family B (MDR/TAP), member 6	Abcb6	1	0.969147	1.04283	0.942193	1.21416	0.984743	0.89313	0.839762		-7.30288	-8.16726	0.520009	0.793204	-8.62399	-3.38097	0.894776
729	66542	AA139624			1	1.02236	0.950084	0.947461	1.09804	1.00586	1.15328	1.05468		-0.719458	-8.16726	-2.67518	0.876583	-8.30087	-0.53971	-6.36809
730	18663	AA145650	phosphoglycerate kinase 2	Pgk2	1	0.921188	0.799137	1.00305	0.866873	0.955929	1.0017	1.11722		-5.50168	-1.85466	0.851739	-5.06417	-3.21269	-8.69671	-7.30288
731	15194	AA250402	Huntington disease gene homolog	Hdh	1	0.900099	0.85423	0.872018	1.1086	1.05698	1.03736	1.04571		-5.75137	0.551987	0.910472	-6.06159	-6.72846	-7.07775	-9.24023
732	12234	AA230588	beta-transducin repeat containing protein	Btrc	1	0.880809	0.995671	1.06468	0.946513	1.09022	1.19264	1.27995		-9.16949	-1.55367	-3.5522	0.32888	-2.22535	0.93906	0.999918
733	252870	AA242262	ubiquitin specific protease 7	Usp7	1	0.9191	0.782145	0.833503	0.919553	1.18422	1.31379	1.1038		-0.0865563	0.999973	0.985335	-5.87579	-0.348635	0.912867	0.999425
734	66542	AA139624			1	0.980471	1.03694	0.747776	1.10934	1.15091	1.16999	1.18197		-9.34519	-1.23675	0.945508	-1.99037	-4.93954	-1.05329	-0.750892
735	56296	AA144949	DMRT-like family B with proline-rich C-terminal, 1	Dmrtb1	1	0.893683	0.679638	1.0007	0.794839	0.894277	1.12779	1.26257		0.967389	0.998492	0.999997	-2.17748	-0.108545	0.787934	-3.9621
736		AA237207			1	1.04331	1.07373	0.892316	1.07442	0.966808	0.925502	0.967078		-8.16726	-8.54796	0.970968	0.971803	-4.44531	-8.07469	0.851739
737	14824	AA242654	granulin	Grn	1	0.964249	0.974291	1.03621	1.07319	0.966917	0.821511	0.829887		-2.5215	-1.05329	-8.9527	-0.0021005	-9.28261	0.957759	0.997976
738	56296	AA144949	DMRT-like family B with proline-rich C-terminal, 1	Dmrtb1	1	1.04343	0.809449	0.907269	0.837517	0.839976	1.07754	1.07894		0.474308	0.999642	0.997769	0.530881	-1.76642	-0.348635	-0.568626
739	18286	AA140320	outer dense fiber of sperm tails 2	Odf2	1	1.02266	0.869855	0.960129	0.884259	0.910707	1.02224	1.0057		-8.30087	-5.25155	0.150752	-4.56804	-1.67997	-9.0587	-6.66908
740	67444	AA231522	RIKEN cDNA 0710007A14 gene	0710007A14Rik	1	0.961578	0.842485	1.06651	1.02179	0.992379	1.05477	0.989329		-5.62663	0.999561	0.99998	-8.0274	-8.83184	0.628357	0.961232
741		AA237290			1	1.16441	0.961963	0.939633	0.914047	0.844423	1.03204	1.0474		0.357613	-6.18473	-0.272658	-9.24023	0.530881	-9.16949	-7.83181
742	114143	AA238482	ATPase, H+ transporting, V0 subunit B	Atp6v0b	1	0.907092	1.01947	1.05545	1.01584	1.06373	1.13711	1.00944		-2.03649	-8.98062	0.843847	-5.12659	-5.37662	0.961232	-0.348635
743		AA217989			1	0.873102	0.836021	1.19807	1.09891	1.04515	0.849372	0.887718		-8.58638	-1.81031	0.999222	-7.78138	-7.73037	-0.248098	-3.21269
744	11629	AA245272	allograft inflammatory factor 1	Aif1	1	1.12882	1.12609	0.961385	1.32063	1.00824	0.825231	0.633633		-5.68903	-9.35786	0.610421	0.628357	-2.27365	-9.25538	0.32888
745	14964	AA221044	histocompatibility 2, D region locus 1	H2-D1	1	1.00249	1.00227	1.00294	0.999911	1.00242	1.00176	1.00532		-3.72619	-8.07469	-3.6099	-1.72297	-0.719458	-9.35786	-8.62399
746	26425	AA220463	nucleotide binding protein 1	Nubp1	1	0.809117	0.857454	0.856904	0.904939	0.86209	0.903852	0.870587		0.996714	0.787934	0.970968	-0.750892	0.940735	0.851739	0.855548
747		AA217989			1	0.853736	0.881021	1.37187	1.27911	1.08373	0.768775	0.784323		-1.43144	0.645562	-8.0274	-8.73179	-1.55367	-4.69138	-4.56804
748	16478	AA241105	Jun proto-oncogene related gene d1	Jund1	1	1.08476	1.01159	0.959986	1.06871	1.07515	1.08106	1.08811		-6.42878	-9.31569	-7.52073	-2.62355	-5.56417	-4.75325	-5.56417
749	17149	AA254528	mago-nashi homolog, proliferation-associated (Drosophila)	Magoh	1	0.851722	0.815986	1.09254	0.93869	1.12485	1.21759	1.21104		0.978994	0.999762	-7.30288	-7.30288	0.782543	0.999999	0.998492
750	15115	AI608026	histidyl-tRNA synthetase	Hars	1	0.857133	0.820142	0.82121	1.11992	1.24287	1.31121	1.20182		0.462313	0.998224	0.876583	0.968321	0.0958604	0.999999	0.876583
751	13627	AA259551	eukaryotic translation elongation factor 1 alpha 1	Eef1a1	1	1.03725	0.991152	0.961415	1.08782	1.01644	1.03105	1.04089		-9.35839	-5.87579	-8.83184	0.995185	-1.85466	-0.0436354	-5.06417
752	76238	AA276224	glyoxylate reductase/hydroxypyruvate reductase	Grhpr	1	1.02154	1.02529	1.01258	1.10936	0.991952	0.938872	0.819435		0.591731	-5.25155	-6.42878	0.450084	-0.511204	0.685541	0.999973
753	56486	AA272212	gamma-aminobutyric acid receptor associated protein	Gabarap	1	0.986027	1.03972	1.04003	1.0538	1.00736	0.993964	0.939436		-6.72846	-6.36809	-6.84628	-1.31327	-9.32464	-9.08281	-0.272658
754	12745	AA285509	calmegin	Clgn	1	1.01527	1.06057	0.982385	1.07595	0.980141	0.918306	0.862205		-8.58638	-8.86342	0.371755	-6.07799	-10.081	-12.9076	-1.9928
755	12745	AA285509	calmegin	Clgn	1	1.00766	1.04072	1.10457	1.00756	0.968003	1.00325	0.912379		0.984054	-16.0586	-16.483	-16.1875	-3.30976	-16.5374	0.981402
756	68961	AA266813	5phosphorylase kinase, gamma 2 (testis)	Phkg2	1	0.916476	0.877487	1.14732	1.05946	1.04484	0.849121	0.871153		-10.081	-6.46704	0.0252666	-17.2847	-17.3519	-3.38117	-2.10348
757	110954	AA286316	ribosomal protein 10	Rpl10	1	0.944637	1.03829	0.747018	1.10375	1.29194	1.23176	1.23553		-7.79538	-13.4188	-0.670299	0.494111	0.976262	0.642582	0.775394
758	13194	AA266564	damage specific DNA binding protein 1	Ddb1	1	1.01426	1.06525	0.986169	1.10249	1.00336	0.974055	0.932654		-14.6545	-16.9898	-8.65187	0.309467	-1.93859	-8.1137	-15.4859
759	13047	AA261063	cut-like 1 (Drosophila)	Cutl1	1	1.00879	1.05955	1.12201	1.28707	0.988851	0.777424	0.671545		-16.7847	-16.8719	-6.86593	-0.138639	-10.6351	-2.96467	-1.00452
760	19085	AA270948	protein kinase, cAMP dependent regulatory, type I beta	Prkar1b	1	0.923163	0.951618	1.01426	1.23857	1.25848	1.21617	1.22526		0.973209	0.401001	-9.74882	0.999982	0.999999	1	1
761	20775	AA268608	squalene epoxidase	Sqle	1	0.885902	0.891571	1.00427	1.13444	1.00693	0.862148	0.839181		-2.39351	-8.00718	-1.8324	-0.636161	-11.8437	-5.42278	0.781241
762	27425	AA269701	ATP synthase, H+ transporting, mitochondrial F0 complex, subunit g	Atp5l	1	0.959177	1.05666	0.952817	1.0593	0.999318	0.942937	0.903154		-1.00452	-14.1031	-3.82649	-2.83222	-17.3267	-14.0079	-7.48105
763	66475	AA270534	ribosomal protein S23	Rps23	1	0.999266	0.888415	0.834438	1.29416	1.0479	0.93491	1.07612		-11.8437	0.614555	0.943848	0.992482	-6.6653	-0.776235	-9.30759
764	19085	AA270948	protein kinase, cAMP dependent regulatory, type I beta	Prkar1b	1	1.00319	0.848977	1.02722	0.956854	0.934429	1.01546	1.19892		-1.08566	0.62411	0.894953	-3.16932	-7.90107	-4.97607	0.978331
765	66171	AA276345	6-phosphogluconolactonase	Pgls	1	0.89456	0.870397	0.940372	1.12733	0.978965	0.97439	0.932558		-3.03209	0.594786	0.99997	-5.42278	-17.3454	-14.9162	-16.6908
766		TRZ503			1	0.986902	0.845988	1.04478	0.79664	0.853907	1.10253	1.22298		-12.5935	-6.27124	0.836956	-14.3832	-4.05992	-13.9117	-2.33396
767	21945	AA471746	death effector domain-containing	Dedd	1	0.999174	0.865992	1.10354	1.08655	1.06481	0.942589	1.05265		-2.83222	0.325526	0.995041	0.00316763	-12.6988	-16.0586	-2.96467
768	14866	AA461810	glutathione S-transferase, mu 5	Gstm5	1	0.955668	0.957125	0.891633	0.98915	1.17947	1.15668	1.16695		-17.337	-0.473978	0.882597	-8.54355	0.986341	0.00316763	0.911232
769	11832	AA500661	aquaporin 7	Aqp7	1	0.90662	1.05179	1.2648	1.3749	1.02959	0.819911	0.662322		-6.17429	-2.45383	-11.8437	-13.717	-10.4135	-17.2028	-1.67863
770	21945	AA471746	death effector domain-containing	Dedd	1	0.851579	0.769941	1.07623	1.06401	1.01164	0.982521	0.784254		-4.80258	0.849696	-8.54355	-2.04776	-9.63829	-6.17429	0.974779
771		AA426845			1	0.804856	0.841818	1.18702	1.25057	1.03236	0.897823	0.7359		-0.636161	-1.78041	-16.4271	-16.9129	-16.3695	-4.63213	0.529907
772	15275	AA451263	hexokinase 1	Hk1	1	0.956172	0.810916	0.943175	0.892783	0.917501	1.07137	1.01041		-0.163867	0.996413	-1.9928	0.885807	0.977661	-16.5374	-8.86942
773		AI508884		ESTs	1	0.893304	0.679111	0.976223	0.838213	0.982657	1.25253	1.26732		-0.297225	0.997806	0.356665	-2.39351	-14.4747	-6.17429	0.0682042
774	268449	AA473164	similar to 60S ribosomal protein L23a	na	1	1.00703	1.05678	0.943754	1.06257	1.00956	1.01417	1.0242		-6.27124	-4.88895	-15.6373	0.371755	-10.8564	-16.1875	-15.7834
775	73545	AA465846	RIKEN cDNA 1700094D03 gene	1700094D03Rik	1	0.925274	0.788582	1.04514	0.937566	0.999925	1.07566	0.996337		-7.79538	-3.30976	0.980823	-9.30759	-15.6373	-1.8324	-6.36883
776	68153	AA412879	general transcription factor II E, polypeptide 2 (beta subunit)	Gtf2e2	1	1.12587	1.13241	1.07289	1.28422	1.017	0.752072	0.610599		-0.849856	-13.5189	-1.93859	0.967919	-4.63213	-12.2748	-3.23914
777	13494	AA275913	developmentally regulated GTP binding protein 1	Drg1	1	0.870577	0.891277	1.11083	1.07982	1.17005	1.14605	1.07376		0.999195	-1.8324	-4.88895	-14.6545	0.997656	0.999865	0.981402
778	17002	AA474964	lactotransferrin	Ltf	1	0.784181	0.794539	0.901421	0.961129	1.06861	1.18678	1.26533		0.99992	0.996953	0.999592	-7.17111	0.518234	0.875924	0.999109
779	23897	AA472437	HS1 binding protein	Hs1bp1	1	0.868188	0.927718	1.14294	1.17553	1.37352	1.35065	1.35019		-0.670299	-1.78041	-15.711	0.985467	1	1	1
780	26441	AA277958	proteasome (prosome, macropain) subunit, alpha type 4	Psma4	1	0.881226	0.878474	0.955824	1.17972	1.06853	1.04202	1.00225		0.0252666	0.685232	-1.00452	0.956837	-5.60652	-6.27124	-14.2908
781	56772	AA275865	expressed sequence AI839562	AI839562	1	0.830243	0.696928	1.14126	0.934355	1.03418	1.12109	1.03859		0.875924	0.994711	-0.325384	-6.56587	-16.2497	-10.5243	-17.1223
782		AA498356			1	0.984953	0.958084	1.00919	0.959111	1.10107	1.10079	1.00568		-3.98131	-13.0112	-13.6183	-16.6908	-8.1137	-8.3279	-13.3179
783	20166	AI098267	rhotekin	Rtkn	1	0.885443	0.746974	1.05989	0.941184	0.993331	1.20566	1.09675		0.989021	0.999993	0.879304	-10.9669	-16.6413	0.552498	-0.70502
784	12516	AA475638	CD7 antigen	Cd7	1	0.959513	1.04738	1.12194	1.25264	0.97989	0.871717	0.664926		-14.7428	-9.41766	-4.97607	-5.2419	-17.3005	-16.9129	-0.537175
785		AA497590			1	0.901356	0.959489	1.0193	1.0214	1.1968	1.28638	1.13158		-1.2558	-13.717	0.205891	-5.33198	0.827917	0.958091	0.888935
786	59008	AA498565	anaphase-promoting complex subunit 5	Anapc5	1	0.986893	1.00732	1.06452	1.14659	1.06721	0.92525	0.895957		-8.00718	-8.22061	-5.69945	-2.89804	-0.0193596	-16.0586	-11.8437
787	16195	AA543149	interleukin 6 signal transducer	Il6st	1	0.862987	0.950159	1.10519	1.21066	1.10235	1.05066	0.904927		0.415169	-10.7458	-1.1694	0.775394	0.978981	0.00316763	-17.267
788	59008	AA498565	anaphase-promoting complex subunit 5	Anapc5	1	0.932525	0.920287	1.09117	1.11592	0.985503	0.939894	0.879925		-14.6545	-8.65187	0.99436	-13.0112	-13.0112	-17.1509	-6.6653
789	103067	AA522020	expressed sequence AA522020	AA522020	1	0.881379	0.926853	1.0698	1.26153	1.13337	1.07587	0.946374		-4.63213	-1.4837	-1.62882	0.900666	0.99535	0.341258	-6.76532
790	21858	AA518165	tissue inhibitor of metalloproteinase 2	Timp2	1	0.855991	0.802448	1.27786	1.27077	1.08832	0.923221	0.85354		-1.4837	0.984054	0.797955	-10.4135	0.940498	-15.5623	-9.19771
791	22027	AA498066	tumor rejection antigen gp96	Tra1	1	0.832472	0.878623	0.937864	1.28189	1.06381	0.921976	0.788888		-4.05992	-0.505301	0.991466	-10.5243	-13.1141	-9.63829	-5.5143
792		AA537645			1	0.894866	1.05725	1.13825	1.34681	1.00912	0.821358	0.599242		-12.06	-10.4135	-10.1918	-12.4878	-10.8564	-13.2163	-0.505301
793	23960	AA290052	2'-5' oligoadenylate synthetase 1G	Oas1g	1	0.898907	0.779899	0.92924	0.829111	0.897009	1.14678	1.1201		-12.4878	0.894953	0.86151	0.990909	-17.3005	-13.6183	-10.1918
794	234847	AI507593	spastic paraplegia 7 homolog (human)	Spg7	1	0.929607	0.781817	1.00743	0.927558	0.899017	1.30658	1.0875		-5.2419	-0.163867	-16.3695	-3.30976	0.927234	-1.53137	-17.1778
795	23960	AA290052	2'-5' oligoadenylate synthetase 1G	Oas1g	1	0.923094	0.994801	1.09819	1.19685	0.976184	0.898497	0.769253		-5.60652	-8.1137	-17.1778	0.849696	-16.7847	-6.56587	0.916112
796	55978	AA274119	RIKEN cDNA 0610009H04 gene	0610009H04Rik	1	0.848684	0.784672	1.12759	1.18224	0.995518	0.937946	0.721974		-6.6653	-0.0423213	-9.85945	-13.717	-15.0012	-16.8292	0.743957
797	50911	AA217904	polymyositis/scleroderma autoantigen 1	Pmscl1	1	0.976856	0.953635	1.05059	1.13328	1.10986	1.03169	1.06034		-16.5902	-15.8543	-15.5623	-0.325384	0.993167	-1.88512	-15.2491
798	50911	AA217904	polymyositis/scleroderma autoantigen 1	Pmscl1	1	0.824216	0.828248	0.891144	1.10119	0.962208	1.06709	0.976801		0.992482	0.999644	-1.67863	-1.30001	-15.9239	-8.00718	-1.9928
799	11450	AA493090	adipocyte complement related protein	Acrp30	1	0.968333	0.965615	1.0913	1.09375	1.14391	1.18916	1.046		-16.8292	-13.0112	-15.5623	-3.90351	0.668758	0.999711	-1.43674
800	234847	AI507593	spastic paraplegia 7 homolog (human)	Spg7	1	0.856293	0.790229	0.804578	0.840141	0.842623	1.00794	1.04395		-0.443198	-0.0423213	0.989689	-4.63213	0.129552	-15.6373	-9.74882
801	71902	AA611688	DNA segment, Chr 10, ERATO Doi 516, expressed	D10Ertd516e	1	1.031	0.96801	0.994346	1.03207	0.958859	0.899333	0.973445		-0.74033	-14.7428	-8.3279	-14.8301	-11.626	-5.60652	0.309467
802	20677	AA612510	SRY-box containing gene 4	Sox4	1	0.861602	0.803632	0.878556	0.89756	0.984306	1.27117	1.26582		-7.27391	-4.21949	0.997413	-13.2163	-3.82649	0.93512	-3.23914
803	71879	AA521959	fatty acid Coenzyme A ligase, long chain 5	Facl5	1	0.953906	0.93518	0.897081	0.890484	1.00219	1.14261	1.20683		-17.2028	-17.226	0.853734	-6.86593	-10.7458	0.0890552	-0.325384
804		AA615692		ESTs, Highly sim	1	0.979802	1.04576	0.767973	1.04448	0.99681	1.09173	0.928382		-10.4135	-14.3832	-0.636161	-0.776235	-5.88737	-4.13931	-16.6908
805		AA501244			1	0.899148	0.993598	1.14981	1.23848	1.11859	0.909901	0.60174		-6.76532	-2.63948	-16.3695	-17.0918	-3.67485	-14.9162	0.965946
806		AA517991			1	0.929023	1.08148	1.1818	1.24673	1.0036	0.919795	0.671649		-13.0112	-8.3279	-17.226	-9.41766	-15.992	-17.2847	0.429039
807	13506	AA500580	desmocollin 2	Dsc2	1	0.928865	0.913827	1.07182	1.21635	1.20465	1.223	1.12405		-0.96491	-0.354055	-12.4878	0.999981	0.999994	0.999996	0.998834
808	20255	AA543702	secretogranin III	Scg3	1	0.948328	0.989144	1.05907	1.07125	1.08972	1.10756	1.1322		-12.3815	-11.735	-10.8564	0.964916	-2.27519	-1.1272	-7.90107
809		AA794084			1	0.908969	0.662502	0.900273	0.791174	0.995264	1.42343	1.35009		-1.8324	0.990909	0.999365	-8.3279	-2.51493	0.875924	-17.3519
810	11650	AA561933	alkaline phosphatase 5	Akp5	1	0.935067	0.859674	1.29502	1.12595	0.981986	0.854356	0.86792		-16.3104	-0.70502	0.604782	-15.1676	-16.1875	-16.2497	-4.63213
811	78294	AA727759	ribosomal protein S27a	Rps27a	1	1.0227	0.986105	0.706745	1.08675	0.879451	1.33305	1.15908		-1.2558	0.205891	0.99932	-2.45383	0.991989	0.84131	0.995198
812		AA734806			1	0.850457	0.942659	0.986935	1.10865	1.03595	1.01199	1.12265		0.494111	-2.96467	-14.1031	-0.412955	-11.1874	-14.7428	-3.16932
813		AA794084			1	0.890524	0.82537	0.833714	1.00217	1.05627	1.06825	1.19961		0.998794	0.999981	0.999845	-16.6908	0.651508	-11.5168	0.168481
814	18750	AA590683	protein kinase C, alpha	Prkca	1	0.868669	0.814442	0.781028	0.981155	1.01207	1.13802	1.33268		-3.60023	0.936961	0.998476	-15.992	-4.54805	-10.9669	0.0252666
815	22629	AA879811	tyrosine 3-monooxygenase/tryptophan 5-monooxygenase activation protein, eta polypeptide	Ywhah	1	0.891508	0.796003	0.916875	1.11583	1.07844	1.131	1.21346		-9.08804	0.94854	0.98591	0.62411	-0.473978	0.737206	0.574112
816	66286	AA592658	RIKEN cDNA 1810029G24 gene	1810029G24Rik	1	0.893803	0.879806	1.16368	1.07097	1.05578	1.00634	0.986877		0.442617	0.994878	0.518234	-2.33396	0.983554	-3.03209	-5.33198
817		AA638454			1	0.883035	0.819351	1.59877	1.01844	1.00985	0.88393	0.761537		-13.8148	0.891983	-15.7834	0.86151	-0.812742	-8.3279	-7.58536
818	54188	AA616057	cleavage and polyadenylation specific factor 4	Cpsf4	1	0.868931	0.849741	1.0651	0.91629	1.01409	1.07979	1.14151		0.927234	0.775394	-8.9786	-4.13931	-17.0255	-7.17111	0.341258
819	13001	AA681604	casein kinase II, beta subunit	Csnk2b	1	0.99088	0.892524	1.0258	0.840702	1.10643	1.18852	1.14555		-9.08804	-1.53137	-17.2847	-0.443198	-7.79538	0.715971	-0.96491
820	19179	AA645829	protease (prosome, macropain) 26S subunit, ATPase 1	Psmc1	1	0.93749	0.851619	1.09814	1.1054	1.04681	1.0621	1.00396		-0.776235	0.341258	-10.6351	-0.473978	-7.48105	-7.69014	-7.37723
821	12525	AA839138	CD8 antigen, alpha chain	Cd8a	1	0.974359	0.948125	1.01419	0.968122	1.158	1.17373	1.11886		-16.4271	-14.2908	-8.65187	-17.337	0.998078	0.995642	-14.4747
822	16542	AA871757	kinase insert domain protein receptor	Kdr	1	0.886165	0.748399	1.1326	0.888064	0.904046	1.2201	1.11291		0.971546	-11.0772	0.715971	-8.43556	-2.15995	0.429039	-14.1031
823		AA681604			1	0.91825	0.848746	1.15671	1.01576	1.0781	0.941406	0.979658		-11.2974	-6.76532	-15.8543	-6.36883	-2.15995	-15.9239	-17.2028
824	18203	AA763991	N-terminal Asn amidase	Ntan1	1	0.895741	0.897618	1.09405	1.08005	1.09645	1.05913	0.984919		0.506304	-10.8564	-14.7428	-0.138639	-0.70502	-15.4082	0.529907
825	67115	AA798998	RIKEN cDNA 3100001N19 gene	3100001N19Rik	1	0.973282	0.987312	1.01327	1.04759	1.02585	0.999603	1.03518		-10.6351	0.259259	-8.22061	-1.57974	0.0890552	-6.07799	-0.383243
826	18203	AA763991	N-terminal Asn amidase	Ntan1	1	0.973084	0.992877	0.93099	1.10563	0.992323	0.977855	0.989873		-15.0012	-13.5189	-7.37723	0.888935	-5.98235	-12.4878	0.168481
827	23880	AI049453	FYN binding protein	Fyb	1	0.901752	0.763468	0.79684	0.930178	1.06329	1.19484	1.19472		-0.925934	0.997051	0.984539	-3.03209	-12.1676	-0.96491	-0.505301
828	14229	AI180957	FK506 binding protein 5	Fkbp5	1	0.816574	0.901472	0.928523	0.884255	0.951474	1.11027	0.932502		0.00316763	-6.07799	0.293072	-11.2974	-6.76532	-12.06	-14.1974
829	57431	AI180850	DnaJ (Hsp40) homolog, subfamily C, member 4	Dnajc4	1	0.891351	0.804335	0.927476	0.938152	0.936527	1.15626	1.00729		-0.189568	0.999464	0.604782	0.999516	-9.41766	0.651508	-9.08804
830		AA798637			1	0.848018	0.829939	1.10632	1.15215	1.1154	1.11156	0.969274		0.455909	-10.8564	-17.3519	-0.569605	0.205891	-1.21227	-9.30759
831	23880	AI049453	FYN binding protein	Fyb	1	1.01274	1.05265	0.858256	1.21523	1.32071	1.35238	1.32334		-12.3815	-6.27124	-15.992	0.987559	0.999942	0.999933	0.995642
832	20677	W14398	SRY-box containing gene 4	Sox4	1	0.951007	0.923769	0.823231	1.11823	1.11019	1.21184	1.21603		-3.23914	-0.0193596	-4.05992	0.988312	0.984054	0.99986	0.981402
833	57431	AI180850	DnaJ (Hsp40) homolog, subfamily C, member 4	Dnajc4	1	0.950703	0.782411	1.05308	0.97705	1.02783	1.08673	1.02948		0.401001	0.993381	0.999711	-15.992	-11.2974	0.614555	-4.46474
834	320585	AA881641	RIKEN cDNA 5730405G21 gene	5730405G21Rik	1	0.945409	0.887417	1.00437	0.864389	1.03221	1.17148	1.08746		-13.1141	-3.52641	0.205891	-1.04477	-17.337	-0.297225	0.574112
835	22248	AA833322	unc-119 homolog (C. elegans)	Unc119	1	0.94306	0.924073	1.00936	1.06578	1.06641	0.99769	0.950852		-3.10031	-17.3519	-9.08804	-5.79307	-16.4271	-17.3005	-1.57974
836	1509	AA770764	cathepsin D (lysosomal aspartyl protease)	CTSD	1	1.03942	1.04036	1.00126	1.04038	1.01456	0.989694	1.03712		-16.6413	-0.537175	-3.82649	-10.081	-7.27391	-16.9522	-15.2491
837		AA882121			1	0.800937	0.851828	0.772269	0.949879	1.17733	1.18469	1.3208		0.999978	0.999994	0.997413	-16.483	0.970677	0.983039	0.999999
838	27176	AA795887	ribosomal protein L7a	Rpl7a	1	0.939208	0.992096	0.900196	0.971222	1.04951	1.09328	1.10568		-5.33198	-17.226	-1.00452	-16.1875	-4.13931	-7.06883	-2.57682
839	19898	AA896365			1	0.860722	0.958694	1.00046	0.984474	0.846889	1.15418	1.00886		-8.22061	0.651508	-4.30046	-13.9117	-9.30759	-10.081	-1.3449
840		AA896773			1	0.889147	0.805012	0.904181	0.970503	0.978791	1.10564	0.919688		-10.7458	-1.39047	-0.138639	-17.1509	-10.5243	-9.41766	-8.1137
841	12857	AA711266	cytochrome c oxidase subunit IV isoform 1	Cox4i1	1	0.972421	0.977331	1.06734	1.01403	1.1008	0.992447	1.02364		-21.2152	-8.27117	-14.127	-16.7902	0.992213	-8.83384	-27.6889
842	19357	AA546839	RAD21 homolog (S. pombe)	Rad21	1	1.05916	1.00918	1.12722	1.02769	0.962726	1.18552	1.12762		-9.71374	-28.4788	0.47634	-9.56418	-20.7007	0.98819	0.914081
843	57296	AA596572	proteasome (prosome, macropain) 26S subunit, non-ATPase, 8	Psmd8	1	0.927814	0.86596	0.994217	0.960707	1.12239	1.21189	1.173		-8.69134	0.742654	-28.1129	-26.7696	-2.25071	0.995371	-0.971568
844	68222	AA760262	4931415M17 mRNA	4931415M17	1	1.02179	1.0628	1.00424	0.895724	1.03732	0.893986	1.0065		-23.1822	-12.7536	-10.6345	-10.1692	-9.71374	-21.7218	-11.593
845	57296	AA596572	proteasome (prosome, macropain) 26S subunit, non-ATPase, 8	Psmd8	1	1.05167	1.0229	0.977814	1.00586	1.25365	1.32477	1.23566		-28.6234	-25.0849	-3.18354	-25.8589	0.991423	0.999992	0.867761
846	105892	AI060382	expressed sequence AI789751	AI789751	1	0.941867	0.684674	0.891553	0.888215	1.09554	1.21689	1.17187		-25.6091	0.999974	0.911545	-22.8664	-15.5375	-7.33437	-11.1092
847	67471	AI120460	RIKEN cDNA 1300003A17 gene	1300003A17Rik	1	1.02185	1.05612	1.08544	1.12195	1.62415	1.91239	1.71588		-28.5194	-17.6888	-0.616554	0.996557	1	1	1
848	19718	AA896210	replication factor C (activator 1) 2	Rfc2	1	0.884757	0.844535	1.0003	1.09323	1.23092	1.26155	1.54787		-0.653086	0.999188	-4.90212	0.999822	1	1	1
849	102247	AA967122	expressed sequence AU041707	AU041707	1	0.868106	0.964681	0.864067	0.820515	1.08339	0.949504	0.919246		-0.887433	-11.1092	0.0286094	0.781481	-28.2319	0.793165	0.984785
850	53415	AI020875	HIV-1 tat interactive protein 2, homolog (human)	Htatip2	1	0.91587	0.963214	0.893812	1.13122	1.33404	1.19204	1.32621		-12.9228	-23.6455	-5.76135	0.860054	0.99995	0.82483	0.871464
851	12055	AI118629	B-cell CLL/lymphoma 7C	Bcl7c	1	1.07942	0.878286	0.844618	0.798701	0.885062	1.04053	0.975517		-27.7665	0.787397	0.903507	-1.05885	0.309342	-17.1496	-0.0432901
852	22789	AA874235	zona pellucida 3 receptor	Zp3r	1	0.892239	0.766272	0.912867	0.893031	0.926005	1.2216	1.29402		0.680949	-1.39034	0.986591	-9.56418	-2.44967	-0.728275	-5.21467
853	12326	AI153488	calcium/calmodulin-dependent protein kinase IV	Camk4	1	0.809767	0.826117	0.946477	1.07038	0.983263	1.19731	1.11928		-0.728275	0.961504	-5.00502	-20.7007	-27.3521	0.749539	-2.95163
854		AI158410			1	0.864043	0.941311	1.05687	1.16297	1.10181	1.27088	1.15661		-0.0432901	-28.7748	-4.40666	0.860054	0.0960973	0.999998	0.998897
855		AI156457			1	0.948591	0.789944	1.07627	0.969816	1.00788	1.21868	1.09068		-15.8942	0.997978	-22.0545	-4.90212	-24.0951	0.961504	-23.025
856	13032	AA939414	cathepsin C	Ctsc	1	0.987535	0.931578	0.953555	0.998681	0.878345	1.09053	0.885266		-27.3521	-20.7007	-10.4783	-25.0849	0.918949	-25.9806	0.984785
857	21833	AA644914	thyroid hormone receptor alpha	Thra	1	0.947013	0.806852	0.898949	1.03046	1.08428	1.26472	1.16498		-27.8413	0.916548	0.995371	-26.5557	-1.44113	0.999994	0.952448
858	14204	AA967055	interleukin 4 induced 1	Il4i1	1	0.928287	0.822324	0.956798	0.931359	1.08497	1.34259	1.28411		-28.0492	0.420379	0.894784	-28.7733	-6.34044	0.996669	0.999267
859	16882	AA967089	ligase III, DNA, ATP-dependent	Lig3	1	0.97782	0.824278	0.894071	0.941408	1.14248	1.29384	1.21338		-25.6091	0.0515844	0.434854	-15.0051	-3.50896	0.997838	0.9591
860	21833	AA644914	thyroid hormone receptor alpha	Thra	1	0.938405	0.916596	0.847987	1.15319	1.12163	1.19685	1.19353		-13.6069	-28.1738	-2.95163	0.985715	-4.12446	0.70553	-0.580716
861	16430	AI195962	intergral membrane protein 1	Itm1	1	1.01715	0.971302	1.03798	1.11657	0.97648	0.90165	0.843124		-18.7642	0.914081	-24.2418	0.551144	-15.5375	-28.7202	-3.26314
862	13081	AI226268	cytochrome P450, family 24, subfamily a, polypeptide 1	Cyp24a1	1	0.91088	0.864172	0.892418	1.04678	1.10362	1.19052	1.15649		-19.8285	0.672346	0.992213	0.911545	0.99984	0.956553	0.993791
863	14667	AI227393	GM2 ganglioside activator protein	Gm2a	1	0.897539	0.819407	0.935789	1.05005	0.964086	1.1543	0.98983		-27.3521	0.775411	-4.21729	-16.073	-24.949	-3.26314	-22.0545
864	17888	AA655446	myosin, heavy polypeptide 6, cardiac muscle, alpha	Myh6	1	0.891839	0.8239	0.898245	1.12954	1.16823	1.19829	1.16149		-9.12244	0.993157	0.998555	0.999883	0.999656	0.999952	0.991423
865		W62757			1	0.970807	0.948484	0.810247	1.05634	1.01295	1.12285	1.12754		-19.6523	-25.9806	-16.252	-17.8685	-0.806363	-17.8685	-23.1822
866	14287	W59651	folylpolyglutamyl synthetase	Fpgs	1	1.08018	1.00989	0.983079	1.29048	1.42328	1.85496	1.61223		-5.21467	-28.287	-9.41577	0.99761	0.99948	1	1
867	18472	W61996	platelet-activating factor acetylhydrolase, isoform 1b, beta1 subunit	Pafah1b1	1	0.873912	0.802886	0.976599	0.93269	1.11109	1.25883	1.20834		-28.7005	0.999961	-15.3597	-1.8805	-4.03288	0.943105	0.982745
868	54369	AA000602	expressed in non-metastatic cells 6, protein	Nme6	1	0.872764	0.852867	1.1047	1.16016	1.05377	1.20769	1.02784		-5.1092	-1.34042	-26.9737	0.27429	-27.168	0.342869	-28.7005
869	54369	AA000602	expressed in non-metastatic cells 6, protein	Nme6	1	0.902878	0.890643	1.21787	1.20745	1.12019	1.25277	0.931047		-28.4352	-2.8027	-18.7642	-0.119832	-16.4313	0.98616	-27.9134
870	13202	W75660	D-dopachrome tautomerase	Ddt	1	0.88275	0.962471	0.807185	1.07205	1.00997	1.01404	0.978904		-8.27117	-6.58117	-0.0432901	-8.97754	-18.5855	-3.67877	-1.8805
871		W70994			1	0.881203	0.933092	1.00406	1.25397	1.20571	1.25995	1.25577		-24.8111	-13.4348	-26.9737	0.927913	-4.31135	0.999531	0.903507
872	56464	AI325870	cathepsin F	Ctsf	1	0.897757	0.882613	1.14693	1.07872	0.943833	0.842026	0.959716		0.720935	-1.34042	0.680949	-4.60105	-6.82708	-12.9228	0.814814
873	19047	W76723	protein phosphatase 1, catalytic subunit, gamma isoform	Ppp1cc	1	0.926486	0.792267	1.08214	1.12454	1.11306	0.982861	1.04583		-28.7748	0.927913	-0.146418	-27.7665	-1.05885	-5.42946	-25.8589
874	81489	W75670	DnaJ (Hsp40) homolog, subfamily B, member 1	Dnajb1	1	0.889446	0.990613	1.03711	1.18065	0.902054	0.74626	0.719033		-9.26852	-10.95	0.359078	-27.6889	-4.60105	-6.70347	-1.44113
875	12257	W82946	benzodiazepine receptor, peripheral	Bzrp	1	0.811502	0.963231	1.24746	0.9693	1.09164	0.96817	1.06902		-5.42946	-15.5375	-26.4453	-26.3325	-23.3381	-28.7202	-16.252
876	69024	AI430334	sorting nexin 15	Snx15	1	0.816369	0.899432	1.16016	0.907673	0.981751	0.988318	0.95182		0.894784	-16.6107	-13.0927	-17.1496	-1.39034	-0.0937876	-12.9228
877	15417	W97853	homeo box B9	Hoxb9	1	1.01801	0.746569	0.873928	0.776007	1.05999	1.3136	1.30254		-10.1692	0.489544	0.99981	-17.5091	-8.97754	0.809609	0.871464
878	19899	AA000133	ribosomal protein L18	Rpl18	1	0.906467	1.07565	0.980432	1.28931	1.35318	1.26475	1.265		-10.7917	-11.593	-26.5557	0.996199	0.99246	0.9927	0.998934
879	56397	W83303	mortality factor 4 like 2	Morf4l2	1	0.975085	0.867182	0.958086	1.32916	1.18341	1.42158	1.22307		-25.4811	-0.545563	-19.4755	0.999934	0.199377	0.999987	-2.44967
880	12226	W83255	B-cell translocation gene 1, anti-proliferative	Btg1	1	1.14011	0.916102	0.820125	0.946704	0.852296	0.933252	0.863548		-0.0188193	-11.7561	0.851929	-22.2192	0.434854	-11.2695	-0.616554
881	27407	W83271	ATP-binding cassette, sub-family F (GCN20), member 2	Abcf2	1	0.828923	0.839446	1.13844	1.16491	1.14054	0.972694	0.97796		0.999899	0.998555	0.999789	0.989931	0.897771	0.819887	-12.5853
882	22059	W87149	transformation related protein 53	Trp53	1	0.899493	0.966299	0.961268	1.11367	0.999982	1.03903	1.02362		-9.26852	-5.32142	-0.201253	-0.411598	-27.5258	-3.10509	-27.8413
883	67861	AI325329	RIKEN cDNA 2310005E10 gene	2310005E10Rik	1	0.891527	0.816033	0.9867	1.19219	0.992669	0.863065	0.888193		0.434854	0.374927	0.875069	-7.07815	-25.0849	-8.13357	-11.7561
884	12444	W98440	cyclin D2	Ccnd2	1	0.940405	0.871414	1.11889	1.07307	0.97655	1.08018	1.09987		-18.048	-4.70013	0.999765	0.0740776	-19.8285	0.961504	0.863959
885	12444	W98440	cyclin D2	Ccnd2	1	0.911701	0.871387	1.0697	0.957346	0.982293	1.06174	1.14076		-11.9202	-10.0163	0.489544	-7.99722	-25.4811	-9.41577	-1.70871
886	20698	AA000819	sphingosine kinase 1	Sphk1	1	1.07958	0.813512	0.934272	0.893327	0.880524	1.1102	1.20756		-24.949	-14.4767	0.999462	-28.4788	-18.7642	-4.12446	-0.0432901
887	276756	W12289	similar to heat shock protein 86	na	1	0.95977	0.850043	1.04563	1.15989	0.989695	1.05115	0.920754		-26.9737	-4.60105	-26.7696	-5.98909	-25.7351	-25.7351	-12.9228
888	19155	W10179	puromycin-sensitive aminopeptidase	Psa	1	0.93247	0.926678	1.01602	0.800889	0.981448	1.14613	1.0684		-26.9737	0.856045	0.894784	-1.05885	-5.32142	-10.3232	-9.12244
889	19155	W10179	puromycin-sensitive aminopeptidase	Psa	1	0.913197	0.843726	0.950154	0.902686	1.09206	1.13081	1.24589		-1.19586	-3.34391	-2.7299	0.626046	-3.42584	0.937803	0.867761
890	59013	AA003085	heterogeneous nuclear ribonucleoprotein H1	Hnrph1	1	0.820682	0.862603	1.04733	0.940532	1.02817	0.962454	1.10591		0.999403	0.991143	0.0740776	-3.42584	-17.6888	-26.9737	-4.12446
891	20090	W12819	ribosomal protein S29	Rps29	1	0.952513	1.03533	1.00837	1.17561	1.02598	0.975104	0.903302		-6.82708	-2.87661	-28.1129	0.998171	0.969839	-15.3597	-28.2319
892		W12121			1	0.929505	1.03246	0.904138	1.18887	1.10339	1.21872	1.13819		0.728356	-17.5091	0.462828	0.999765	0.871464	0.999992	0.998044
893		W12121			1	0.923169	0.916827	0.986364	1.07817	1.065	1.13493	1.12208		-20.3538	-0.511085	-27.3521	-28.3393	-0.379719	0.932036	-2.7299
894	14751	W29397	glucose phosphate isomerase 1	Gpi1	1	0.855668	0.925582	0.984758	1.00276	0.899067	0.93618	0.95805		0.900678	-1.19586	-3.42584	-8.27117	-0.84652	-6.58117	-0.258366
895	15203	W11571	hephaestin	Heph	1	0.962814	0.991069	0.953511	1.19115	1.16338	1.2898	1.27498		-28.5194	-18.4066	-28.7202	0.997838	0.900678	0.99981	0.998694
896	15203	W11571	hephaestin	Heph	1	1.00535	1.02951	0.853273	1.15123	1.11859	1.19652	1.29889		-28.0492	-28.6234	-24.0951	0.82483	-0.766951	0.489544	0.960319
897	20090	W12819	ribosomal protein S29	Rps29	1	1.07524	1.04528	0.984337	1.1934	0.986379	0.870017	0.837369		-26.2174	-17.6888	-18.4066	-0.580716	-13.0927	-18.048	-7.33437
898	74617	W10703	RIKEN cDNA 4833411K15 gene	4833411K15Rik	1	0.951335	1.02023	0.948102	1.32166	1.25559	1.52824	1.44476		-24.6715	-26.9737	-23.3381	1	0.989604	1	1
899	74617	W10703	RIKEN cDNA 4833411K15 gene	4833411K15Rik	1	0.948774	0.976367	1.02379	1.18591	1.17846	1.51656	1.54651		-21.8886	-22.8664	-24.2418	0.999958	0.894784	1	1
900	74617	W10703	RIKEN cDNA 4833411K15 gene	4833411K15Rik	1	0.962374	1.03608	1.15002	1.22289	1.17488	1.27552	1.47005		-28.7369	-10.7917	-28.4788	0.999989	0.970751	1	1
901	66082	W34507	abhydrolase domain containing 6	Abhd6	1	0.918956	0.961135	1.07641	1.52838	2.1253	2.65593	2.64398		-3.59327	-9.71374	-27.8413	1	1	1	1
902	22697	W12178	zinc finger proliferation 1	Zipro1	1	0.972286	1.05856	0.875916	1.07546	1.12484	1.24473	1.23445		-22.8664	-18.2274	0.847703	0.937803	0.83891	0.999711	0.999656
903	14751	W29397	glucose phosphate isomerase 1	Gpi1	1	0.87034	0.900155	0.955919	1.02913	0.992848	0.983713	0.925043		0.809609	-0.348466	-1.24319	-6.95197	-28.7506	-22.0545	-1.99989
904	56040	W14267	ribosomal protein, large, P1	Rplp1	1	0.958629	1.07771	0.925593	1.19977	1.23021	1.30136	1.26476		-25.2189	-13.6069	-13.7796	0.97785	0.987415	0.996199	0.159397
905	20016	W20956	RNA polymerase 1-1	Rpo1-1	1	0.855875	0.841458	1.04554	1.14628	1.02496	0.927021	0.886972		0.996072	0.996777	0.99727	-1.34042	-1.70871	-21.5539	-15.3597
906	22378	W41126	WW domain binding protein 2	Wbp2	1	0.936093	0.967245	1.02645	0.965782	1.0029	1.03646	1.03451		-0.430735	-1.19188	0.684807	0.993531	-30.1972	-2.98348	-40.4243
907	22378	W41126	WW domain binding protein 2	Wbp2	1	1.00015	0.954439	0.842591	1.06061	0.935023	0.993999	1.05662		-6.39348	-30.8091	0.013465	0.928251	-16.2287	-28.974	-37.6732
908	22378	W41126	WW domain binding protein 2	Wbp2	1	1.07944	0.967284	0.837619	0.919872	0.99827	1.06452	1.025		-30.1972	-23.8614	0.585135	-11.9034	-47.4063	-3.70615	-49.42
909	22697	W12178	zinc finger proliferation 1	Zipro1	1	0.993015	0.991914	0.841092	0.899991	0.945558	1.08491	1.16097		-24.1554	-22.1226	0.999974	-11.6974	-0.693279	-2.14284	0.957324
910	67279	W30130	RIKEN cDNA 3110004H13 gene	3110004H13Rik	1	0.985784	0.740865	1.14537	0.998267	0.96309	0.892783	0.967079		-39.0748	0.396188	0.999991	-44.2896	-46.6122	-44.504	-43.8503
911	15425	W33293	homeo box C6	Hoxc6	1	0.882904	0.851511	0.988819	1.24202	1.05362	0.854657	0.763854		-37.1	-21.2714	0.990415	-42.2091	-44.9219	-4.21006	-0.266018
912	20024	W11216	RNA polymerase II transcriptional coactivator	Rpo2tc1	1	1.17531	1.10567	0.84597	0.848631	1.00743	1.22257	1.04157		-7.26064	-49.5127	-3.70615	-41.2053	-46.7797	-16.9806	-15.495
913	56040	W14267	ribosomal protein, large, P1	Rplp1	1	0.981892	0.99594	1.06292	1.05816	1.26489	1.23899	1.29787		-43.6255	-11.0928	-28.0588	-7.72202	0.573707	-7.88	0.456965
914	73025	W96827	RIKEN cDNA 2900070H08 gene	2900070H08Rik	1	0.909132	0.887827	1.03592	1.02324	1.15208	1.27467	1.27474		0.456965	-12.5345	0.41194	-5.85545	-0.266018	0.999984	1
915	67966	AA123204	RIKEN cDNA 2410141K03 gene	2410141K03Rik	1	0.839305	0.828573	1.14069	1.07776	1.03043	0.902196	0.927899		-0.734066	0.380049	-23.2768	-26.5427	-18.0103	-31.7257	-49.3071
916	12010	AA048817	beta-2 microglobulin	B2m	1	1.04825	1.09648	0.899954	0.973172	1.02153	1.00047	1.02538		-47.5519	-14.0836	-16.4774	-12.9663	-42.2091	-49.3661	-41.7128
917	230648	AA119086	RIKEN cDNA 4732418C07 gene	4732418C07Rik	1	0.97408	0.811854	1.09006	0.8936	1.01392	1.0485	1.07283		-40.4243	0.83095	-3.90272	-2.73743	-28.0588	-26.8447	-1.57192
918	14287	W59651	folylpolyglutamyl synthetase	Fpgs	1	0.935121	0.930478	1.01584	1.08408	1.04315	1.04011	1.0499		-15.0161	-25.0438	-13.6302	0.329235	-12.322	-38.5199	-31.7257
919		AA690074			1	1.04053	0.785477	0.969439	0.968049	0.967842	1.21108	1.12157		-49.6365	0.866022	0.561988	-18.8023	-44.9219	0.195556	-6.96343
920	66622	W70991	RIKEN cDNA 5730410I19 gene	5730410I19Rik	1	0.882016	0.814485	1.01694	0.943492	1.05199	1.13399	1.2568		-3.51609	0.953186	0.216031	-15.2545	-31.7257	0.471254	-1.75143
921	18521	AA057997	poly(rC) binding protein 2	Pcbp2	1	1.071	0.84926	0.705335	1.02233	1.07355	1.38272	1.20852		-45.5209	-7.72202	-0.0908718	-30.1972	-28.0588	0.989433	-1.45793
922	66679	AA543515	RAE1 RNA export 1 homolog (S. pombe)	Rae1	1	0.901237	0.84528	0.957433	1.14998	1.18555	1.12398	1.09642		-1.14178	0.880863	-14.0836	0.869888	0.380049	-15.0161	0.914062
923	11459	AA066878	actin, alpha 1, skeletal muscle	Acta1	1	1.04517	0.887413	0.926793	1.19121	1.04856	1.07409	0.933109		-49.0997	-5.85545	-19.8831	-24.4505	-6.12053	-7.56614	-9.57758
924	67087	AA014587	catenin beta interacting protein 1	Catnbip1	1	0.827384	0.884887	1.14754	0.893803	0.962272	1.01951	1.01367		-21.8374	-48.0889	-15.495	-48.8476	-8.36668	-15.7375	-1.45793
925		AW111317			1	0.709953	0.68802	0.734741	0.834926	1.15967	1.10522	1.03545		0.999708	0.999921	0.99987	-0.235184	-0.465879	-11.6974	-36.2286
926	109182	W84173			1	1.03234	0.968218	0.854206	1.16665	1.168	1.2718	1.24728		-17.75	-49.243	-40.9475	0.81033	-10.3176	0.174597	-0.396343
927		W98166	male enhanced antigen 1	Mea1	1	0.867178	0.804396	0.966933	1.20068	1.16728	1.28699	1.17604		0.573707	0.998949	-0.501787	0.997278	0.982862	1	0.992622
928	65116	W62792	proline-rich Gla (G-carboxyglutamic acid) polypeptide 2	Prrg2	1	0.821549	0.935804	0.896477	1.07	0.987572	1.11593	1.01409		0.999965	-6.67441	0.997851	-13.6302	-41.7128	0.877306	-16.4774
929	67615	AI893737	ubiquitin-conjugating enzyme E2R 2	Ube2r2	1	0.84203	0.790524	0.775685	1.00023	0.894823	1.09129	1.04393		-0.501787	0.99286	0.999996	-40.159	0.236031	-40.159	-28.3635
930	229007	AI430503	cDNA sequence BC021513	BC021513	1	0.854206	0.824513	0.976195	0.881352	1.04279	1.06419	1.11929		0.897232	0.999988	0.999975	-12.9663	-19.6103	0.83095	0.380049
931	11746	AA929367	annexin A4	Anxa4	1	1.05728	0.924079	0.915264	1.05817	1.00308	1.23554	1.14648		-49.0997	-25.3419	-49.3661	-10.8957	-49.4689	-0.614236	-0.0908718
932	105156	AA000136	expressed sequence AI414999	AI414999	1	0.969767	0.80049	1.0202	0.971902	0.871709	1.1334	1.13445		-31.4204	-2.35568	0.938341	-44.504	-17.2352	-11.4937	0.195556
933	11843	W98112	ADP-ribosylation factor 4	Arf4	1	1.00076	0.978839	0.900968	1.11	1.04694	1.2746	1.03941		-6.53294	-48.5512	0.396188	0.31147	-49.5513	0.953186	-49.6132
934	110058	W75713	brain and kidney protein	Bk	1	1.10496	0.873912	0.74708	0.828926	0.957057	1.03456	1.22091		-21.5537	-47.8296	0.675948	-37.1	-9.04561	-42.6937	0.59628
935	78903	AA142678	Werner helicasae interacting protein 1	Wrnip1	1	1.05207	1.05514	0.965579	0.911897	0.82128	0.832973	0.851715		0.894139	-18.5365	-0.235184	-10.5081	0.999995	0.985401	0.986746
936	66052	W65755	succinate dehydrogenase complex, subunit C, integral membrane protein	Sdhc	1	1.05688	1.15526	1.02907	1.03821	1.07284	1.11093	1.11604		-30.8091	0.958624	-48.2116	-24.1554	-43.166	-28.3635	-14.7798
937	320269	AA709662	RIKEN cDNA D030063F01 gene	D030063F01Rik	1	0.984856	0.733273	1.064	0.85676	1.08148	1.15823	1.16312		-0.997433	0.999999	-36.2286	-6.8179	-4.42349	0.947068	0.990415
938		AA003195		ESTs, Weakly sim	1	0.762375	0.803919	0.986916	0.898332	1.05446	1.1664	1.29539		0.99997	0.862048	-19.6103	-40.9475	-43.166	-20.9906	0.908767
939	67785	AI853513	RIKEN cDNA 6330503C17 gene	6330503C17Rik	1	1.02445	0.762915	0.780723	0.80068	1.07687	1.10749	1.74917		-48.8476	-7.26064	0.835765	-18.5365	-6.53294	-12.1116	-1.40259
940	28146	W65555	DNA segment, Chr 3, University of California at Los Angeles 1	D3Ucla1	1	0.885233	0.844889	0.84328	1.07598	1.0486	1.14048	1.0809		-45.325	-0.11846	-12.7493	-19.0699	-49.1739	-10.5081	-49.0206
941	22059	AA272516	transformation related protein 53	Trp53	1	0.89583	0.799211	1.09544	1.15628	0.993014	1.01694	0.91621		-35.6407	-0.614236	-48.7537	-23.5685	-48.9366	-41.2053	-30.8091
942	381323	AA139324	similar to 60S ribosomal protein L18a	na	1	0.898021	1.01626	1.08012	1.23578	1.29763	1.23252	1.22276		0.900239	-49.6365	-14.3136	0.999986	0.999996	0.99997	0.999779
943	380843	W36651	similar to dJ259A10.1 (ssDNA binding protein (SEB4D))	na	1	1.09231	0.905259	0.833691	1.12042	0.93862	1.30811	1.04383		-49.6752	-45.5209	-9.94317	-18.0103	-30.5032	-2.98348	-45.5209
944	18597	W41118	pyruvate dehydrogenase E1 alpha 1	Pdha1	1	1.1379	0.919554	0.978022	1.191	1.15157	1.29329	1.24177		-10.8957	-38.6681	-73.7016	-0.780926	-5.66821	0.993191	-3.6058
945		W85203		ESTs	1	1.04214	0.800357	0.93963	0.879273	1.01196	1.19796	1.08839		-81.7655	-45.1055	-25.0229	-65.155	-83.8286	-20.2551	-58.8441
946	19730	W40905	ral guanine nucleotide dissociation stimulator	Ralgds	1	0.909144	0.814704	0.933939	0.916358	0.94048	0.983404	1.18135		-3.81598	-5.81042	0.984969	-70.0773	-8.63666	-83.5565	-10.696
947	68209	AW107630	RIKEN cDNA 1500026D16 gene	1500026D16Rik	1	0.954361	0.980166	1.26995	0.984145	1.06688	1.10671	1.19516		-60.3353	-53.7817	-75.525	-1.28109	-22.0159	0.879894	-0.346611
948		W82759			1	0.905098	0.780358	1.31519	0.94266	0.953002	0.882051	1.03125		-14.4044	-1.97249	-13.8648	-38.1862	-61.3194	-48.1536	-33.9576
949	66039	W48339	DNA segment, Chr 14, ERATO Doi 449, expressed	D14Ertd449e	1	0.933955	0.94186	1.00193	0.943045	0.924666	0.794689	0.751258		-66.0839	-27.0181	-72.1418	-65.155	0.997162	1	1
950	14955	W78370	H19 fetal liver mRNA	H19	1	0.811825	0.790582	1.10462	1.17487	1.07376	0.883653	0.968703		-0.417609	-7.37566	-7.20698	-34.8792	-62.7781	-78.7013	-81.576
951		AA638422			1	0.834906	0.781926	0.810199	1.06068	1.01282	1.02973	0.981353		0.997064	0.0664643	0.999907	-49.687	-61.8081	-31.7034	-83.4832
952		AI785658			1	0.882153	0.949135	0.982244	1.236	1.2745	1.32103	1.35068		-26.2095	-8.44772	-17.0107	0.999999	1	1	1
953	12826	W33832	procollagen, type IV, alpha 1	Col4a1	1	0.992854	1.06453	1.15614	1.20183	1.18025	1.25892	1.23659		-71.3306	-43.0954	-37.7065	0.996278	-1.97249	0.999978	0.964143
954	68545	W48242	RIKEN cDNA 1110006O17 gene	1110006O17Rik	1	0.910409	0.829082	1.02921	1.12155	0.987723	1.02175	1.04441		0.994042	0.999857	0.999817	0.988048	0.644053	0.612399	-1.83449
955	11864	AW488277	aryl hydrocarbon receptor nuclear translocator 2	Arnt2	1	0.895727	0.930975	1.12538	1.1633	0.911916	0.770032	0.692249		-48.6642	-49.687	-1.63809	-82.1206	-61.8081	-22.7459	-7.72147
956	66542	AA521700			1	1.09166	1.03286	0.767023	1.15926	0.963079	1.17164	1.18874		-41.6033	-19.2429	-0.278858	0.9349	-78.4139	-5.25633	-83.7249
957		AI528851			1	1.05367	1.03053	0.915316	1.09076	1.06549	1.11105	1.10009		0.0909773	-5.25633	0.623232	0.138238	-14.6795	0.16101	-47.1341
958	98529	AA103412	RIKEN cDNA C230066K19 gene	C230066K19Rik	1	1.09139	0.779245	0.802197	0.903241	1.00103	1.22402	1.20978		-42.099	0.500914	0.601274	-67.8988	-81.1732	-2.11636	-3.6058
959	19737	W65084	regulator of G-protein signaling 5	Rgs5	1	0.991544	0.86809	1.16143	0.956848	0.987554	0.893787	0.965811		-7.72147	-44.0978	0.708734	-81.3785	-74.4485	-44.601	-65.6211
960	217410	AA004106	expressed sequence AW319517	AW319517	1	0.968353	0.963323	0.962554	0.903134	1.01109	1.12076	1.24333		-45.6112	-81.3785	-0.610185	-82.8653	-20.9483	-20.2551	0.989862
961	244757	AA008684	cDNA sequence BC038479	BC038479	1	0.947489	0.772238	1.07428	0.844538	0.99798	1.19204	1.22631		-81.576	-1.11927	-73.7016	-11.1463	-81.9471	-7.37566	-30.3869
962	52615	AA465867	DNA segment, Chr 11, ERATO Doi 530, expressed	D11Ertd530e	1	1.13229	0.969437	1.05062	0.974973	0.930584	1.1217	1.20108		-7.72147	-51.7352	-66.0839	-72.5397	-25.4149	-0.780926	0.811992
963	14433	AI838143	glyceraldehyde-3-phosphate dehydrogenase	Gapd	1	1.0064	0.951822	1.03393	0.975264	0.982341	0.924488	0.923883		-83.6212	-32.1484	-51.7352	-44.0978	-82.4431	-35.344	0.971312
964	12306	AI182836	annexin A2	Anxa2	1	0.888316	0.851146	1.06979	1.13156	0.923484	0.914593	0.837354		-22.0159	0.86039	-8.44772	-83.8329	-83.3111	-13.082	-10.2588
965	17859	AA013767	Max interacting protein 1	Mxi1	1	1.0447	0.921283	1.04651	1.01188	1.05697	1.25457	1.07523		-61.3194	-12.828	-57.3378	-57.3378	-72.1418	0.938822	-63.7377
966		AW113080			1	0.877622	1.02882	0.859478	1.14004	0.91925	0.893681	1.046		-58.8441	-81.576	-5.66821	-38.6681	-62.7781	-67.8988	-12.0869
967	14972	AA017870	histocompatibility 2, K region	H2-K	1	0.940781	1.11323	0.916358	1.14841	1.13663	1.22893	1.14728		-53.2706	-66.5431	-46.6256	-49.687	-4.03431	0.886944	0.800569
968		AA473524			1	1.02289	1.02312	0.941523	0.936182	1.02317	0.957786	1.02212		-81.3785	-83.4832	-10.2588	-9.83445	-12.3305	-12.3305	-3.5037
969	67469	AW208577	RIKEN cDNA 1300003D03 gene	1300003D03Rik	1	0.964556	0.993699	0.999691	1.02573	1.51608	1.76917	1.71314		-55.3112	-83.6773	-31.7034	-7.72147	1	1	1
970	67023	AW556272	RIKEN cDNA 2010315L10 gene	2010315L10Rik	1	0.850273	0.921465	0.936212	1.06139	1.1235	0.96378	0.9699		0.998894	0.637793	0.0182519	-98.9035	-21.8285	-61.2391	-144.276
971		AA051402		ESTs	1	0.97375	0.947949	0.784255	0.827948	1.12197	1.20546	1.01546		-128.83	-50.5444	0.424242	-18.2807	-93.688	-25.8512	-131.798
972	269037	AA051395	hypothetical gene supported by BC025094	na	1	0.75986	0.842057	0.9466	0.821674	1.08188	1.05033	1.09193		0.999981	-1.75744	0.999999	-1.55502	-102.337	-82.302	-31.9898
973	72503	AI509955	RIKEN cDNA 2610507B11 gene	2610507B11Rik	1	0.938656	0.908233	0.934655	0.901656	1.09295	1.26172	1.12322		-28.8078	0.39044	-5.73188	-4.86112	-13.9355	0.999997	-8.2091
974		AV040099		ESTs	1	0.904274	0.956502	1.04442	1.18068	1.10633	1.23368	1.07536		-1.97423	-133.976	-83.1755	0.0449901	-6.88744	0.99964	0.978143
975	18245	AI876540	ornithine decarboxylase antizyme	Oaz1	1	0.915599	0.960555	0.902245	1.15199	0.962412	1.104	0.983272		-104.881	-64.4673	-7.24737	-13.9355	-70.2693	-5.73188	-84.05
976	102754	AA138615	expressed sequence AW107703	AW107703	1	0.960306	0.850598	0.939662	1.0902	0.926838	1.0214	0.957128		-113.881	0.0449901	-17.9146	-105.722	-9.94491	-121.443	-54.2478
977		AA039148		ESTs	1	1.21793	0.794563	0.779849	1.00082	0.67975	0.78629	0.617438		-41.5868	-33.1009	-66.9317	-142.151	-0.777193	-12.7704	0.920937
978	12406	AI838326	serine (or cysteine) proteinase inhibitor, clade H, member 1	Serpinh1	1	1.0334	0.85689	0.917921	1.03154	1.04498	1.34262	1.3233		-8.2091	-15.1792	-109.863	-23.5563	-104.881	0.999247	0.976663
979	209361	AA176054	TAF3 RNA polymerase II, TATA box binding protein (TBP)-associated factor	Taf3	1	0.818428	0.66476	0.935401	0.927244	1.07052	1.13198	1.20074		-1.07936	-0.685771	-0.43677	-111.487	-44.9129	-136.436	-10.4193
980	11848	AA619989	ras homolog gene family, member A	Arha	1	0.954474	1.05613	0.811428	1.03106	1.05098	1.14454	1.02384		-72.807	-16.5046	0.277537	-9.4871	-87.5549	-24.915	-116.989
981	66902	AI322646	methylthioadenosine phosphorylase	Mtap	1	0.939854	0.846481	0.968014	0.980359	1.29742	1.35886	1.21174		-133.449	-15.0671	-14.0713	-17.2236	0.971535	0.984323	-1.01014
982		AI786105			1	0.973498	0.769215	0.856298	0.911644	1.22744	1.16243	1.16743		-207.259	0.563878	-13.7511	-193.719	-4.47828	-18.7897	-16.4796
983		AA048374			1	0.87928	0.796854	0.983989	1.09872	1.04806	1.07135	0.945401		-146.281	-5.81137	-41.8376	-101.423	-132.564	-125.004	-137.586
984		AI747776			1	1.00382	0.974008	0.828378	1.09657	1.146	1.21699	1.24976		-207.1	-199.022	0.935866	-3.84288	-0.372469	0.959207	0.994306
985	54124	W80209	CDC28 protein kinase 1	Cks1	1	0.921113	0.795638	1.28339	0.919128	1.00533	0.985902	1.04606		-8.03001	0.379756	-85.0334	-53.8833	-155.963	-160.657	-83.9096
986	321022	AI845410	carnitine deficiency-associated gene expressed in ventricle 3	Cdv3	1	0.910459	0.756314	1.22569	0.90332	0.95604	0.964278	1.01515		-0.00940657	0.99486	-207.259	-0.067904	-196.513	-131.305	-161.813
987	12313	W89749	calmodulin 1	Calm1	1	0.893141	0.902651	0.978175	1.10128	1.01557	1.16292	1.10287		-88.4458	-34.9759	-276.837	-78.4875	-246.836	-0.625492	-290.254
988	15939	AI608314	immediate early response 5	Ier5	1	0.899495	0.892231	1.08697	1.05538	1.00815	1.0303	0.993253		-2.72993	-2.5344	-319.666	-154.482	-385.437	-307.447	-383.569
989	67023	W20833	RIKEN cDNA 2010315L10 gene	2010315L10Rik	1	0.887535	0.919369	1.00818	0.942929	1.13758	1.11686	1.03785		-71.8759	-53.4325	-386.226	-148.346	-216.49	-200.369	-385.437
990		AA016454			1	0.821973	0.796946	1.15526	1.22406	0.966539	0.917627	0.829707		0.005369	0.362446	-16.1464	-214.172	-256.155	-132.605	-337.882
991	30926	W36243	thioredoxin-like 2	Txnl2	1	0.941406	0.913391	1.02528	0.993247	1.29964	1.35707	1.30285		-744.331	-201.268	-27.41	-68.9608	0.996876	0.998755	0.965836
992	14793	AW061348	cell division cycle associated 3	Cdca3	1	1.00052	1.05656	0.908738	1.16891	1.19104	1.16448	1.30208		-960.424	-898.843	-868.632	-2.52226	0.914094	-9.10492	0.863544
993	19193	AA388435	pipecolic acid oxidase	Pipox	1	1.0077	0.945816	0.915555	0.88587	1.07923	0.977433	0.965994		-929.965	-1073.31	-145.436	-142.644	-973.995	-426.725	-78.4655
994	14870	AA710940	glutathione S-transferase, pi 2	Gstp2	1	1.10426	1.36272	1.50731	1.56641	1.56697	1.56718	1.57203		-1122.8	-28.5962	0.983403	0.999397	0.999328	0.999074	0.999802
995		AI662549			1	0.953875	0.994921	0.881898	0.988583	1.19255	1.25859	1.27876		-1849.2	-524.529	-584.319	-541.197	-33.946	0.708573	0.905969
996	11951	AA000254	ATP synthase, H+ transporting, mitochondrial F0 complex, subunit c (subunit 9), isoform 1	Atp5g1	1	0.869542	1.02753	0.916639	1.129	1.09319	1.11955	1.17881		-190.244	-1687.12	-453.679	-2.00195	-276.341	-382.965	-13.6107
997	16011	AW414054	insulin-like growth factor binding protein 5	Igfbp5	1	0.829779	0.76696	1.06027	1.11586	1.09662	1.11241	0.96869		-2844.92	-38.3538	-2955.35	-1574.54	-1134.65	-2945.01	-4678.6
998	11739	AI272544	solute carrier family 25 (mitochondrial carrier; adenine nucleotide translocator), member 4	Slc25a4	1	0.951237	0.87918	1.01843	0.991184	1.13126	1.33681	1.45887		-215.236	-908.672	-3875.16	-4357.07	-64.7014	0.99948	1
999	20425	AA110410	serine hydroxymethyl transferase 1 (soluble)	Shmt1	1	0.926752	0.892544	0.943513	0.973445	0.907453	0.952115	0.808268		-3872.09	-745.273	-255.165	-5109.41	-120.102	-30.4393	0.999999
1000		AA238899			1	1.07538	1.00811	0.898399	1.21681	1.10316	1.189	1.12343		-376.143	-475.776	-78.3282	0.969177	-55.3508	-0.712543	-717.379
1001		AA396041			1	0.819059	0.77463	0.896496	0.904811	0.94892	1.27243	1.24801		-15.7847	-549.955	-26.6729	-288.385	-774.846	-28.1319	-1228.8
1002	216501	AA028511			1	0.962118	0.913661	0.882252	0.898558	0.978648	1.27797	1.07837		-1719.71	-1733.45	-50.6615	-1348.84	-1299.7	-55.8749	-1177.06
1003	55951	AI876247	brain protein 44-like	Brp44l	1	0.960889	0.952705	0.743368	1.01599	1.03488	1.12001	0.968179		-841.142	-466.754	-8.57255	-933.248	-550.676	-590.477	-914.07
1004	106931	AA050271	RIKEN cDNA 4933402K10 gene	4933402K10Rik	1	0.964809	1.02354	0.872774	1.16649	1.26855	1.32288	1.31564		-285.972	-231.785	-19.993	-3.97254	0.612482	0.600488	0.980556
1005	68262	AA033390	1-acylglycerol-3-phosphate O-acyltransferase 1 (lysophosphatidic acid acyltransferase, delta)	Agpat4	1	0.921377	0.645293	0.980589	0.809627	1.02786	1.31254	1.45089		-41.405	0.974582	0.997758	-331.962	-78.4585	-10.8611	0.98182
1006	108679	AA435079	COP9 (constitutive photomorphogenic) homolog, subunit 8 (Arabidopsis thaliana)	Cops8	1	0.860535	0.886592	0.90012	1.01606	1.20892	1.20483	1.23694		0.390596	-3.14103	0.292889	-284.305	0.997423	0.999758	0.99842
1007	14077	AI327465	fatty acid binding protein 3, muscle and heart	Fabp3	1	0.782464	0.826939	1.08107	1.07015	1.08256	0.889846	0.827034		-9.78247	-20.4581	-0.591031	-311.023	-140.324	-287.62	-337.353
1008	14359	AW322547	fragile X mental retardation gene 1, autosomal homolog	Fxr1h	1	0.884397	0.900436	0.957142	1.17274	1.05483	0.956925	0.944839		-89.4054	-3.8451	0.983567	-0.0970249	-2.82531	-151.545	-19.0883
1009	50868	AA175476	kelch-like ECH-associated protein 1	Keap1	1	0.906995	0.846692	1.25632	1.22154	1.12197	0.905684	0.7612		-337.439	-47.4673	-101.289	-11.6332	-27.6777	-55.6649	-11.6332
1010	16571	AI323080	kinesin family member 4	Kif4	1	0.910617	0.799219	1.32003	1.00355	0.977723	1.11589	1.10568		-86.4637	-0.5153	-49.3412	-78.5999	-119.853	-27.6777	-1.23874
1011	66163	AI325513	mitochondrial ribosomal protein L4	Mrpl4	1	0.961861	0.907073	1.09807	0.915218	1.02067	1.22215	1.01208		-50.7157	0.990195	-31.7185	-126.683	-128.63	0.941192	-52.1083
1012		AI845093			1	0.989558	1.03211	0.88546	0.845674	0.908151	1.02605	1.09341		-125.491	-126.683	-116.797	-129.16	-27.6777	-105.058	-25.3366
1013	66480	W33336	ribosomal protein L15	Rpl15	1	0.940751	0.972061	0.966751	1.10618	1.3661	1.32593	1.35179		-61.5559	-89.5761	-60.0622	-3.57563	0.999846	0.999998	0.999973
1014	56409	AA068786	nudix (nucleotide diphosphate linked moiety X)-type motif 3	Nudt3	1	0.930996	0.864727	0.915272	1.09221	0.990977	1.06389	1.10097		-0.728412	0.273447	-14.4296	-50.0261	-17.6971	-18.7753	-8.63053
1015	67828	AI594901	RIKEN cDNA 1110055J05 gene	1110055J05Rik	1	0.987823	0.799544	1.00697	0.861381	1.03642	1.11372	1.31736		-32.2492	0.0150063	0.210065	-128.921	-3.7971	-42.7592	0.757793
1016	20104	AW556869	ribosomal protein S6	Rps6	1	1.01834	1.04384	0.886686	1.22857	1.26429	1.22928	1.33117		-85.6814	-120.791	-106.419	0.993219	0.999852	0.959886	0.984901
1017	12455	AW146398	cyclin T1	Ccnt1	1	0.882657	0.780238	0.839439	0.744071	1.08336	1.14676	1.11285		0.969001	1	0.998207	0.999999	-61.5559	-1.54208	0.935341
1018	227094	AA138012	RIKEN cDNA 5330401P04 gene	5330401P04Rik	1	0.895425	0.982424	1.07326	1.37857	1.02595	0.767589	0.644341		-85.6814	-75.4494	-52.1083	-44.6811	-125.491	-15.6778	-7.83649
1019		AW046042			1	0.93872	0.984047	0.909589	0.928314	1.05294	1.21279	1.19231		-126.95	-76.2363	0.836214	-118.369	-108.411	0.971872	-8.63053
1020		AA108842			1	0.871242	0.748655	0.722737	1.0969	1.01202	1.023	0.916942		-2.91049	-6.77472	-7.9724	-41.2121	-25.4917	-33.207	-39.6674
1021	69274	AA178118	CTD (carboxy-terminal domain, RNA polymerase II, polypeptide A) small phosphatase-like	Ctdspl	1	0.807235	0.732545	0.90619	0.801429	1.06151	1.2263	1.05799		0.981674	0.998607	-5.20999	0.966657	-14.753	-1.06294	-14.074
1022	235459	AA098360	general transcription factor II A, 2	Gtf2a2	1	0.819969	0.899908	0.906035	0.854708	1	1.03424	0.923002		0.999967	-2.22756	-2.2981	0.932471	-11.1444	-46.6943	-42.6
1023		AI316008			1	1.01776	1.02165	0.883878	0.940417	1.02145	1.01303	1.0244		-41.4204	-15.6852	0.99182	-1.6481	-9.4746	-36.9757	-10.9505
1024		AA517885			1	1.03636	1.04449	0.82696	0.951251	1.04463	1.03755	1.04844		-44.9573	-46.4034	0.884523	-0.836465	-32.0832	-41.0005	-14.9832
1025	20345	AI530577	selectin, platelet (p-selectin) ligand	Selpl	1	0.829014	0.87036	0.839725	0.899957	0.954504	0.901922	0.887164		0.334847	-0.711289	0.947039	0.985348	-7.9724	0.202959	0.994485
1026	54214	AI607869	golgi autoantigen, golgin subfamily a, 4	Golga4	1	1.11692	0.792967	0.628595	0.992717	0.930744	1.10138	1.3665		-37.9876	0.242877	-0.0267029	-40.3472	-36.9757	-33.4854	-3.42932
1027	16997	AW230323	latent transforming growth factor beta binding protein 2	Ltbp2	1	0.817845	0.829903	0.908038	0.941488	0.942214	1.26105	1.14485		0.416517	-5.0916	-0.221213	-36.7175	-45.0815	-20.7625	-0.13414
1028	67248	AA098569	ribosomal protein L39	Rpl39	1	0.959557	0.838947	0.868949	1.12121	1.28066	1.31341	1.57297		-7.50833	-5.57601	-37.7379	0.999716	0.999946	0.999854	1
1029	319604	AA968029	RIKEN cDNA B930006L02 gene	B930006L02Rik	1	0.911961	0.658167	0.932159	0.916792	1.01779	1.14717	1.27038		0.446532	0.999933	0.988677	-45.9991	-0.0267029	-5.70167	0.540775
1030	230765	AW061243	similar to histone deacetylase	na	1	0.987858	0.863573	0.910311	1.14758	1.26367	1.32068	1.24259		-44.1227	0.598783	-11.9405	0.620028	0.999345	0.999944	0.984871
1031	212880	AA198943	DEAD (Asp-Glu-Ala-Asp) box polypeptide 46	Ddx46	1	0.870245	0.727846	0.811598	0.841414	1.048	1.2621	1.40043		-11.5383	0.741948	0.999705	-34.0387	-1.76855	-1.42063	0.703348
1032	67869	AW209010	polyadenylate-binding protein-interacting protein 2	Paip2	1	0.999913	0.993738	0.766124	1.12142	1.13431	1.10078	1.21193		-45.734	-43.9691	0.994109	0.849836	0.64995	-3.07754	0.0235079
1033	14231	AI182368	FK506 binding protein 7	Fkbp7	1	0.969166	0.805051	1.11773	0.895588	0.986084	1.2072	1.09547		-25.2068	0.703348	-5.70167	-4.00321	-34.0387	-11.1444	-0.0526686
1034		AA469690			1	1.00654	1.00057	0.944639	0.804219	1.00882	0.946362	1.11663		-42.2206	-37.9876	-46.3478	-45.2013	-35.9313	-46.2875	-34.8588
1035		AA178547		ESTs, Highly sim	1	0.924289	0.814007	1.07769	0.849853	0.857942	1.09282	1.16831		-45.2013	-2.2981	-11.9405	-7.8157	-11.1444	-27.4984	-7.35765
1036	105808	AA209976			1	0.740803	0.794926	0.864876	0.868933	1.03001	1.04685	1.05076		0.977117	0.741948	-18.1428	-8.78642	-43.1419	-45.5344	-43.8115
1037	20185	AW319455	nuclear receptor co-repressor 1	Ncor1	1	1.03737	0.867792	0.930993	0.90299	1.07065	1.19344	1.18165		-22.1233	0.782074	-26.0631	-1.06294	-46.5414	-0.13414	0.782074
1038		AI386138			1	0.88539	0.845678	1.06692	1.0459	1.21441	1.34524	1.27031		0.831453	0.22315	-34.8588	-2.51758	0.996042	0.999849	0.999928
1039	20249	AA124027	stearoyl-Coenzyme A desaturase 1	Scd1	1	1.0343	1.03395	1.00601	0.963973	1.03437	1.03394	1.03669		-39.6674	-43.8115	-36.4573	-11.3403	-13.4128	-42.2206	-46.5777
1040		AI530358			1	1.00659	1.00682	0.976024	0.967413	1.00687	1.00484	1.00869		-45.3168	-46.5002	-19.697	0.202959	-8.78642	-7.35765	-2.36995
1041	13645	AI326499	epidermal growth factor	Egf	1	0.952744	0.745656	1.08105	0.777973	0.944524	1.2548	1.47791		-5.82919	-43.6499	0.965603	0.334847	-46.3478	0.351971	0.996419
1042	56727	AA139428	aldehyde reductase (aldose reductase)-like 6	Aldrl6	1	0.839885	0.761524	0.987594	0.877968	1.05947	1.1971	1.44268		-0.379651	-1.21019	0.926081	-1.21019	-18.1428	-40.1235	-1.42063
1043	66427	AA276490	RIKEN cDNA 1810044O22 gene	1810044O22Rik	1	1.22431	1.03113	1.01603	1.01376	1.15351	1.28416	1.24539		0.998699	-43.6499	-42.0257	0.877542	-4.97499	0.996867	-3.16325
1044	67890	AI528546	RIKEN cDNA 1810045K17 gene	1810045K17Rik	1	0.883322	0.82415	0.763467	0.994018	1.02745	1.19852	1.11591		-42.4121	0.334847	0.996297	-38.235	-32.0832	-15.6852	-10.1959
1045	13361	AI152401	dihydrofolate reductase	Dhfr	1	0.860289	0.777631	0.979078	1.01385	1.02226	1.07886	0.932005		-0.711289	0.862365	-2.74916	-1.36646	-37.7379	-42.0257	-1.42063
1046	30946	AA009183	activator of basal transcription	Abt1	1	0.877887	0.913642	0.942162	0.971246	1.05651	1.08833	1.04073		0.999553	-0.632062	-7.20896	-14.074	-40.3472	-1.16013	0.887871
1047	18584	AI551852	phosphodiesterase 8A	Pde8a	1	0.907255	0.804714	0.875812	1.15071	1.00452	1.14701	1.06815		-14.074	0.991549	0.993911	-14.074	-45.2013	0.994109	-7.50833
1048	14433	AW549806	glyceraldehyde-3-phosphate dehydrogenase	Gapd	1	1.02226	1.01998	0.979773	1.0129	1.00626	1.0159	1.00665		-44.4176	-12.982	-32.0832	0.900366	-32.0832	-35.3983	-2.15828
1049		AA218406			1	0.860318	0.886732	0.820239	0.915753	1.05706	1.07515	1.02926		0.502357	-1.95797	0.97984	-6.08983	-37.7379	-21.5753	-37.9876
1050	14319	AW322317	ferritin heavy chain	Fth	1	1.07184	1.02518	0.948791	1.04291	1.05004	1.00257	1.03212		-42.7844	-24.3559	-30.0877	-15.9229	-11.1444	-43.4845	-45.4278
1051	14268	AA145458	fibronectin 1	Fn1	1	1.00627	1.00527	0.981018	1.0042	1.00627	1.00475	1.00877		-42.4121	-34.5868	-4.31192	0.957277	-14.074	-32.9275	-20.227
1052	20678	AI528773	SRY-box containing gene 5	Sox5	1	1.0916	1.08367	0.816063	0.995152	1.06223	1.15752	1.08044		-4.70796	-8.85385	0.605405	-15.6111	-12.1468	0.27748	-1.25224
1053	234199	AW111160	fibrinogen-like protein 1	Fgl1	1	0.687032	0.672468	0.733171	0.698227	0.80901	0.745993	0.857699		0.966999	0.990024	-0.846938	0.750942	0.243024	0.832757	0.225265
1054	51960	AI464681	DNA segment, Chr 1, ERATO Doi 8, expressed	D1Ertd8e	1	0.964518	0.712321	0.800087	0.797643	1.08374	1.30708	1.34694		-17.0311	0.938851	0.993392	-2.95841	0.634029	-2.50939	-3.51927
1055		AA272208			1	1.02795	1.01836	0.887129	0.908865	1.02821	0.994784	1.03381		-16.7567	-14.718	0.999657	-13.6937	-5.14285	-17.2717	-13.496
1056	51788	AA239740	H2A histone family, member Z	H2afz	1	0.912946	0.752799	0.744771	0.778188	1.17214	1.49314	1.38797		0.110907	-0.0878548	-7.15822	-2.27003	0.813783	0.225265	-1.88057
1057	69870	AI131619	RIKEN cDNA 2010003I19 gene	2010003I19Rik	1	0.940192	0.762418	0.90953	0.854505	1.0922	1.33364	1.40462		-2.27003	0.983066	0.750942	-0.471653	-12.5721	0.999721	1
1058		AW061031			1	0.900846	0.97492	0.904912	1.00744	0.969912	0.927425	0.93259		-3.74278	0.530649	0.989377	-16.3996	-15.7569	-9.51129	-6.06683
1059	67684	AI447315	RIKEN cDNA 3300001P08 gene	3300001P08Rik	1	1.14485	0.808176	0.802806	0.70398	0.924816	1.27163	1.09692		-13.1939	-1.12385	-0.240454	0.27748	-10.2848	-5.5961	-10.3955
1060	319624	AA266610			1	0.837312	0.851089	1.09369	1.11501	0.780051	1.27135	1.27635		-5.78235	-0.0640429	-5.97133	-8.85385	-16.8847	0.906236	-2.32871
1061		AA276433			1	1.09096	0.992359	0.922114	0.985935	0.949653	1.09907	1.10341		-11.497	-17.2382	-17.2186	-2.8919	-10.6167	0.090492	0.845799
1062	71994	W91223	calponin 3, acidic	Cnn3	1	1.00445	0.957728	0.80375	1.21368	0.881696	0.838387	0.776526		-1.88057	-3.37426	0.564113	-11.497	-15.5362	-8.5285	-0.737585
1063	56358	AA222096	coatomer protein complex, subunit zeta 2	Copz2	1	1.09282	0.939986	0.909311	1.07086	0.992372	1.09366	0.9661		-4.45612	-5.68888	-11.497	-14.2667	-14.718	-7.05611	-16.3996
1064		AA498478			1	1.19873	1.04991	0.746352	0.920814	0.908794	1.0093	1.00521		-7.78151	-6.85352	-5.32199	-13.9842	0.757368	-12.2538	0.507082
1065	68545	AA267694	RIKEN cDNA 1110006O17 gene	1110006O17Rik	1	0.960466	0.772685	1.07615	1.14151	0.952955	0.932428	0.886384		-15.9652	0.97159	0.469756	-10.7273	-17.3305	-8.7451	-12.4665
1066		AA530536			1	1.14019	0.977345	0.811076	0.895282	0.88713	1.09208	1.09755		-8.63665	0.130925	-0.0878548	-14.6298	-5.23206	-9.84232	-17.3277
1067	99237	AA184663	expressed sequence AU045326	AU045326	1	1.01088	0.922599	0.873068	0.814657	1.51568	1.44338	1.05123		-9.95286	-17.3081	0.310556	-16.2225	0.0696739	-8.85385	0.737621
1068	106916	AA269823			1	1.3478	1.02514	0.639551	0.844649	1.02805	0.953087	1.09581		-8.42067	-12.2538	0.416091	-15.4599	-16.1604	-2.27003	-10.5061
1069	18619	AI836387	preproenkephalin 1	Penk1	1	0.857476	0.794403	0.837669	0.953848	0.97913	0.959066	1.12568		-5.23206	0.32659	0.997736	-10.2848	-13.496	-12.4665	0.00473993
1070		AA434866			1	0.814699	0.772468	0.719629	1.2057	0.918523	1.01993	1.26203		-9.40123	0.781586	0.995787	-9.62151	-16.9239	-14.8051	-6.16298
1071	107350	AA260226	expressed sequence AW112010	AW112010	1	0.927815	0.841939	0.807804	1.08723	0.929151	1.10983	0.966273		-10.5061	0.737621	-0.381061	-14.0793	-15.4599	-7.15822	-17.3277
1072	20848	W62227	signal transducer and activator of transcription 3	Stat3	1	0.685922	0.797037	0.810211	0.938626	0.879859	0.802131	1.02307		0.974819	-0.0406773	0.945541	-3.66748	-3.02573	0.769768	-11.0582
1073	19737	AA198048	regulator of G-protein signaling 5	Rgs5	1	0.979249	0.752166	0.821381	1.08362	0.918714	1.1311	0.962531		-7.67644	0.945541	0.865465	-17.1491	-4.70796	-13.1939	-12.2538
1074	83435	AA467382	pleckstrin homology domain-containing, family A (phosphoinositide binding specific) member 3	Plekha3	1	0.815003	0.930238	0.790798	1.08018	0.925316	1.14284	1.1963		0.966999	-15.2235	0.995048	-17.1223	-14.359	0.387499	0.999387
1075		AW413231			1	0.88819	0.755908	1.0715	1.14331	1.16145	0.964445	0.905696		-3.30296	0.716419	0.737621	-0.53475	-1.72485	-16.2831	-10.3955
1076	227197	AI595947	NADH dehydrogenase (ubiquinone) Fe-S protein 1	Ndufs1	1	1.12234	0.960024	0.776975	1.0773	1.09719	1.09236	1.15482		-1.52737	0.342297	0.494909	-4.62324	-11.8234	0.709013	0.624703
1077	105559	AA472152	muscleblind-like 2	Mbnl2	1	1.00623	0.89765	0.858589	0.857615	1.09626	1.10995	1.08565		-12.8857	-17.0633	0.32659	-17.2717	-11.278	-10.6167	-16.2225
1078	56386	AA444448	UDP-Gal:betaGlcNAc beta 1,4-galactosyltransferase, polypeptide 6	B4galt6	1	0.997202	1.01503	0.874717	1.36025	0.948871	1.05315	0.88944		-3.66748	-16.801	0.787284	0.937061	-0.63358	-10.6167	-16.3421
1079		AA404201			1	1.41363	1.05685	0.654307	1.10731	0.838561	1.09169	1.09413		0.615163	-1.77602	-9.51129	-0.961811	-14.4503	-15.1421	-4.96665
1080		AA683961			1	1.24353	0.815686	0.574342	0.988242	0.917514	1.01354	1.21351		-5.23206	0.090492	-0.567129	-3.23245	-14.8051	-12.2538	-16.5097
1081	231086	AW107943	hydroxyacyl-Coenzyme A dehydrogenase/3-ketoacyl-Coenzyme A thiolase/enoyl-Coenzyme A hydratase (trifunctional protein), beta subunit	Hadhb	1	1.04553	0.863066	0.663724	0.800903	1.17192	1.30342	1.53663		-1.43289	0.709013	-1.29638	0.387499	0.955619	0.999887	0.999979
1082		AA444288			1	1.08821	0.95192	0.645369	1.05079	0.827087	1.24412	1.21652		-17.2857	-3.97346	-12.2538	-2.6971	-16.6135	-9.95286	-7.15822
1083	16211	AA451240	karyopherin (importin) beta 1	Kpnb1	1	0.949093	0.840097	0.893393	0.844331	0.938336	1.09394	1.03223		-17.3165	0.995921	0.977008	-1.57567	0.00473993	-3.51927	-14.6298
1084	30045	AA473149	J domain protein 1	Jdp1	1	0.726593	0.879268	0.902736	0.909008	0.842792	1.112	1.19066		0.999606	-2.57117	-1.08237	-15.7569	-0.162032	-14.8051	-7.05611
1085	50493	AA473156	thioredoxin reductase 1	Txnrd1	1	0.983476	0.837976	0.942878	1.10667	1.37602	1.6875	1.57063		-16.0317	0.0696739	-4.62324	0.959374	1	1	1
1086	24128	AA472293	5'-3' exoribonuclease 2	Xrn2	1	0.84503	0.793752	1.36627	0.941106	1.10435	1.15361	0.94496		0.387499	-1.6744	-10.8377	-16.0317	-5.14285	-1.62468	-15.2235
1087		AA275912			1	1.10634	1.04453	0.907446	1.01553	0.956794	1.14532	1.13015		-14.6298	-14.359	-7.78151	-0.922896	-17.2558	-0.502927	-14.5406
1088	66641	AI839862	RIKEN cDNA 5730470L24 gene	5730470L24Rik	1	0.923793	0.914257	0.833194	1.17057	0.986065	1.0581	1.04351		-0.0878548	0.929398	0.983066	0.090492	-15.6847	-0.351919	-10.5061
1089	78738	AI604259			1	1.04376	0.919725	0.764412	0.959838	0.933388	1.21907	0.985078		-17.2717	-8.85385	0.372746	-16.4555	-6.55393	-13.396	-13.6937
1090	60527	AA444721	fatty acid desaturase 3	Fads3	1	1.0707	0.744413	0.85088	0.920973	1.05096	1.07945	0.958597		-10.7273	0.990632	0.998479	-7.67644	-16.8847	-17.3081	-13.496
1091	67268	AA498585	RIKEN cDNA 2900073G15 gene	2900073G15Rik	1	1.07207	0.987531	0.6884	1.19491	1.21018	1.16896	1.0008		-5.23206	-11.278	-2.76124	-9.40123	-5.05438	0.892153	-0.922896
1092		AW558713			1	1.24372	0.975124	0.702261	1.01804	0.840693	1.06802	1.16703		-8.5285	-7.67644	-2.32871	0.574784	-7.05611	-14.1735	0.709013
1093		AA471826			1	1.0808	0.928809	0.70648	0.85916	0.975841	1.17338	1.12822		-15.7569	-2.95841	0.775749	-16.4555	-15.3035	-11.9316	-6.55393
1094	15212	AW212513	hexosaminidase B	Hexb	1	0.898634	0.935973	0.902279	1.20664	1.03866	1.1008	1.00895		-16.8437	-13.396	-7.36402	-13.5953	-15.8972	-3.59298	-2.6971
1095	54138	W97905	spinocerebellar ataxia 10 homolog (human)	Sca10	1					0.493921
1096		AA763800			1	0.86473	0.851574	0.580861	1.01633	0.827321	0.934597	1.14223		-6.45526	0.990632	0.999999	-0.213831	0.999996	0.429939	0.999795
1097	12955	AA032699	crystallin, alpha B	Cryab	1	0.905636	0.775476	1.03758	0.96618	1.027	1.24794	1.15214		-0.846938	0.955619	-4.96665	-4.96665	-13.6937	0.530649	-0.846938
1098	11642	AV255496	A kinase (PRKA) anchor protein 3	Akap3	1	0.899489	1.00365	0.764238	1.09947	1.01095	1.10095	1.22252		-5.32199	-17.3314	0.999802	-6.3572	-15.8277	-2.44838	0.916244
1099	78757	AA265143	RIKEN cDNA 4921505C17 gene	4921505C17Rik	1	0.921211	0.975715	0.918763	1.29266	0.978098	1.0653	1.12192		-14.8051	-15.7569	0.857895	-1.12385	-10.8377	0.605405	0.828189
1100	67439	AI132344	RIKEN cDNA 0610041O14 gene	0610041O14Rik	1	0.908544	1.15611	0.800096	1.36444	0.898052	0.792251	0.673838		-8.31319	-17.1741	0.879494	-5.05438	-13.5953	-6.55393	0.387499
1101	16010	AI648975	insulin-like growth factor binding protein 4	Igfbp4	1	0.856623	0.906026	0.693083	0.853946	0.828326	0.884585	0.853381		0.984563	-2.09858	0.999809	-3.44637	0.98833	0.998262	0.991745
1102	381141	AI317560	similar to tropomyosin isoform 6	na	1	0.902256	0.964408	0.872463	1.24768	0.971637	1.30052	1.23878		-14.0793	-17.3165	-1.08237	0.937061	-13.0918	0.999298	0.677599
1103	54401	AI747607	tyrosine 3-monooxygenase/tryptophan 5-monooxygenase activation protein, beta polypeptide	Ywhab	1	1.06531	0.994247	0.80957	0.940876	1.06308	1.10658	1.19728		-2.38816	-10.0635	0.985933	-11.8234	-13.5953	-4.5393	0.920864
1104	19242	AI035723	pleiotrophin	Ptn	1	0.981188	0.806231	1.08006	1.18918	0.957749	0.771959	0.755017		-14.8051	-1.20878	0.574784	-16.3996	-17.2186	-17.3305	-11.9316
1105	16502	W85433	potassium voltage gated channel, Shaw-related subfamily, member 1	Kcnc1	1	1.02409	0.875878	0.921732	0.874835	1.02713	1.13786	1.28712		-10.1741	0.372746	-3.16275	-2.21211	-14.4503	0.99914	0.983066
1106	320871	AI042819	RIKEN cDNA B230206H07 gene	B230206H07Rik	1	1.07541	0.883476	0.809581	1.07272	0.912039	1.18526	1.26194		-16.2831	-13.5953	0.469756	-0.922896	-17.0937	-1.77602	-0.112119
1107	64143	AI605906	v-ral simian leukemia viral oncogene homolog B (ras related)	Ralb	1	1.00874	0.91686	1.10673	0.918948	0.944324	0.979187	1.01797		-15.6847	-2.63374	0.387499	-4.2921	-7.67644	-11.0582	-6.45526
1108		AA980470			1	0.843899	0.881782	0.878605	1.2673	1.05431	1.42155	1.44838		0.999669	-3.66748	-0.846938	0.958157	0.99766	0.99992	1
1109	27224	AA544002	transcription elongation factor B (SIII), polypeptide 3	Tceb3	1	1.16935	0.823613	0.712373	0.882743	0.739867	0.961855	0.923137		-0.846938	-5.5961	0.861728	-0.667665	0.969832	-0.213831	0.813783
1110	56419	AI645426	diaphanous homolog 3 (Drosophila)	Diap3	1	0.93153	0.889758	1.00982	1.2966	1.22275	1.14982	1.05934		-2.09858	-10.6167	0.387499	0.895118	-0.213831	0.996752	-0.240454
1111	17235	AI482284	mitochondrial capsule selenoprotein	Mcsp	1	0.858711	0.870228	0.991825	1.19573	0.957581	1.58117	1.39069		-6.3572	-6.55393	-12.1468	0.260427	-15.4599	0.999517	0.624703
1112	56016	AI853496	heme binding protein 2	Hebp2	1	0.971947	0.819568	0.911108	1.15624	1.11184	1.07639	1.13862		-1.6744	-2.04295	-1.47978	0.443496	-1.04154	-1.43289	-8.63665
1113	282619	AV211018	suprabasin	Sbsn	1	1.0537	0.840322	0.942574	1.03898	1.07083	1.20925	1.13711		-15.8972	-0.922896	-17.0633	-0.60007	-17.2558	-3.02573	-1.20878
1114	12350	AA250061	carbonic anhydrase 3	Car3	1	1.37998	0.955578	0.497937	0.995714	0.436219	0.449821	0.543429		0.982537	-17.1223	0.911372	-7.05611	1	1	1
1115		AA611756			1	1.2585	0.922355	0.669057	1.00761	0.945917	1.13648	1.11508		-1.08237	-13.496	0.27748	-10.0635	-7.57182	-1.3867	-16.6135
1116		AW550046			1	0.800693	0.930739			1.15585	0.698853	1.07898
1117		AI323712			1	0.805991	0.73215	0.987192	0.998846	0.953963	0.997637	1.07433		0.991745	0.99788	0.996752	-12.8857	-15.9652	-1.93395	0.494909
1118		AA499647			1	1.03533	0.94996	1.02814	0.78509	0.957051	1.10813	1.09879		-4.79343	-6.85352	-7.57182	-2.38816	-13.2953	-14.8911	-7.46767
1119	109624	AA510479	caldesmon 1	Cald1	1	1.03117	0.661338	0.774478	1.15227	0.891239	1.16405	1.17086		-13.7914	0.983066	-8.96286	-11.9316	-14.4503	-4.62324	-15.1421
1120		AW412946			1	1.08808	0.943886	0.57794	1.10182	0.966693	1.13275	1.48911		-12.0394	0.150551	0.998529	0.564113	0.225265	-2.09858	0.090492
1121	17344	AA547266	Msx-interacting-zinc finger	Miz1	1	0.882865	0.749831	0.795539	1.16771	0.839467	0.984125	1.0105		0.443496	0.997417	0.997501	-17.3165	-6.16298	-13.8882	-14.4503
1122	20692	AI593343	secreted acidic cysteine rich glycoprotein	Sparc	1	0.937477	0.910727	0.781665	1.02888	0.920259	1.05069	1.20592		-3.81888	-1.52737	0.984079	-10.948	-16.5624	-4.21126	-16.4555
1123	17191	AA386999	methyl-CpG binding domain protein 2	Mbd2	1	1.04835	0.944402	0.78325	1.2237	1.07786	1.20017	1.09726		-4.5393	-10.1741	-3.44637	-1.16598	-6.55393	1	0.660768
1124	12632	AA512729	cofilin 2, muscle	Cfl2	1	1.13269	0.837241	0.716072	1.14739	0.900051	1.18391	1.41065		-4.70796	-4.96665	0.429939	-7.57182	-17.2717	0.553204	-0.323294
1125	11429	W97350	aconitase 2, mitochondrial	Aco2	1	0.994124	0.970381	0.765673	0.989764	0.928282	0.883736	1.02528		-1.12385	-13.8882	0.996957	-15.8277	-1.98808	-0.323294	-3.09384
1126	67484	AI558193	RIKEN cDNA 2310005P05 gene	2310005P05Rik	1	0.876372	1.02773	0.895712	1.12995	0.858144	0.897953	1.03843		-10.0635	-11.1682	-1.52737	-2.6971	0.895118	0.991479	-8.09932
1127		AI558197			1	0.836852	0.882022	1.02272	1.10322	0.918637	0.876786	1.06377		-4.2921	-1.16598	0.999223	-13.2953	-11.3876	0.832757	-13.9842
1128		AW558401			1	1.18786	0.976142	0.6646	0.980792	0.854566	1.09063	1.20979		0.0484466	0.401946	0.507082	-11.0582	-17.0311	-17.0937	-17.1741
1129	17841	AW110038	major urinary protein 2	Mup2	1	1.51668	1.07553	0.524221	1.17763	0.993391	1.35352	0.955352		-1.3412	-16.0317	0.828189	-11.6061	-17.3305	-4.87966	-16.6135
1130	13074	AI561913	cytochrome P450, family 17, subfamily a, polypeptide 1	Cyp17a1	1	1.04706	0.88989	0.806583	1.07756	0.917916	1.08477	1.20555		-13.496	-8.7451	0.942287	-4.21126	-15.3824	-13.496	-0.112119
1131	20103	AW123651	ribosomal protein S5	Rps5	1	0.963189	0.876321	1.02421	1.13896	1.13212	1.13845	1.10346		-0.737585	0.985933	-9.29133	0.942287	0.999995	0.999016	0.574784
1132	66440	AA590680	cell division cycle 26	Cdc26	1	0.816493	0.831223	0.851194	1.22774	1.01468	0.974866	0.953183		0.998712	0.553204	-0.0878548	-14.718	-3.89577	-17.2186	-13.1939
1133	19241	AW106872	thymosin, beta 4, X chromosome	Tmsb4x	1	1.1555	0.9695	1.0216	0.982238	1.04464	1.25115	1.18579		-12.6772	-17.2857	-12.8857	-10.7273	-14.5406	0.981992	-4.5393
1134	20363	AW208804	selenoprotein P, plasma, 1	Sepp1	1	0.902872	0.890039	0.562435	1.11031	0.7098	0.842213	0.882248		-4.79343	-4.96665	0.518994	-8.96286	0.99994	0.999879	0.999975
1135	15505	AW049097	heat shock protein 105	Hsp105	1	0.988096	0.641312	1.04686	0.892985	0.885107	1.07872	0.840766		-11.7149	0.99766	-3.02573	-7.78151	-11.278	-10.2848	0.999366
1136	64602	AA590687	iron responsive element binding protein 2	Ireb2	1	1.11929	0.736258	1.13704	0.950082	0.750861	0.907891	0.887296		-6.85352	0.35768	-1.16598	0.652058	-6.55393	0.865465	-2.38816
1137	13417	AI121650	dynein, axonemal, heavy chain 8	Dnahc8	1	0.927551	0.841033	0.685566	1.01269	1.11079	0.991784	1.04683		-1.47978	0.605405	-0.0406773	-3.74278	-14.359	-17.3165	-0.502927
1138		AA611210			1	1.30084	1.11883	0.767007	0.962627	0.991013	1.0938	1.23702		0.757368	-8.63665	-16.0317	-8.63665	-16.5624	-6.25977	0.750942
1139		AA616058			1	1.01499	0.920609	0.8466	0.831342	1.05362	1.11771	1.20425		-14.4503	-8.5285	0.243024	-1.88057	-16.5097	-6.45526	-5.87651
1140		AI173369			1	1.28281	1.04507	0.875266	1.11	0.98889	1.10007	1.02518		0.372746	-17.0633	-16.2225	-0.846938	-14.359	-0.136843	-14.9759
1141		AW258347			1	0.729008	0.89401	0.623852	0.843688	0.834474	0.841566	0.987162		0.990632	-0.213831	0.945541	-0.187692	-3.81888	-1.20878	-6.25977
1142	26360	AI573606	angiopoietin-like 2	Angptl2	1	0.880145	0.883346	0.879179	1.0795	1.00171	1.12463	1.36152		-12.2538	-14.9759	0.940592	-4.1312	-17.3081	-0.213831	0.981992
1143	14081	AI195250	fatty acid Coenzyme A ligase, long chain 2	Facl2	1	0.825031	0.793213	0.775391	1.07886	0.946974	0.957753	0.997638		0.998836	0.999773	0.999996	-14.2667	-13.396	-7.57182	-14.5406
1144		AA286093			1	0.83259	0.900715	0.679507	1.12847	1.09515	1.11329	1.23898		-4.79343	-8.96286	-0.112119	-17.3165	0.482468	-14.6298	-14.8911
1145	12166	AW260128	bone morphogenetic protein receptor, type 1A	Bmpr1a	1	0.806018	0.899915	0.842176	1.19102	1.16855	1.39003	1.46396		0.999956	-0.401891	-0.0217899	0.991384	0.99993	0.999996	1
1146	94185	AI850244	tumor necrosis factor receptor superfamily, member 21	Tnfrsf21	1	0.932276	0.852937	0.76601	1.00809	0.979467	1.40638	1.25563		-2.9713	-0.37695	0.992609	-0.478723	-1.64237	0.988673	0.997022
1147	19385	AI836209	RAN binding protein 1	Ranbp1	1	0.95289	0.90351	0.939701	1.11713	1.10743	1.30161	1.12388		-1.52848	0.525218	-6.00904	0.994407	0.768581	0.998672	0.503838
1148	14030	AI465022	Ewing sarcoma homolog	Ewsh	1	0.974501	0.882278	0.792377	1.02478	0.893605	1.37364	1.50932		-5.19477	-0.756984	-1.79873	-5.53968	-6.99687	0.827783	0.998038
1149	26943	AI226304	tumor differentially expressed 1	Tde1	1	1.04964	0.888227	0.646854	1.00574	0.87769	1.10654	1.11526		-6.95984	-3.25314	0.997768	-6.97447	-0.103043	-4.06999	-6.93189
1150		AW682577			1	0.88198	0.9625	0.801165	1.13294	0.910313	1.13692	1.16942		-6.97447	-4.54929	0.999949	-1.79873	-0.972386	0.691956	0.226005
1151		AA821652			1			0.877716	0.889162	1.14795	1.43563	1.18949
1152	54338	AA821651	solute carrier family 23 (nucleobase transporters), member 2	Slc23a2	1	1.0163	0.991024	0.786462	1.11561	1.05416	1.21206	1.23439		-6.89679	-4.92339	-4.06999	-3.87682	-0.328062	0.768581	0.999012
1153	51886	AA797522	DNA segment, Chr 3, ERATO Doi 330, expressed	D3Ertd330e	1	1.05392	0.848883	0.936972	0.90761	1.02424	1.12533	1.16288		-4.54929	0.999723	-6.61823	0.869693	0.95024	0.997207	0.930851
1154		AA275311			1	0.947578	0.887142	0.87463	1.05493	0.973236	1.20208	1.37649		-6.59384	-3.5395	-6.99401	-3.44365	-6.99687	0.301667	0.992379
1155	11947	AI840187	ATP synthase, H+ transporting mitochondrial F1 complex, beta subunit	Atp5b	1	0.928163	0.84083	0.907663	0.950291	1.05977	1.28645	1.34443		-0.558599	0.975532	-4.5018	-2.21097	0.301667	0.999997	0.988673
1156	68643	AA267309	RIKEN cDNA 1110013I11 gene	1110013I11Rik	1	0.9386	0.74497	0.872341	0.966221	0.968368	1.26705	1.2004		-6.48947	0.967374	0.57526	-5.32663	-6.99687	-2.9713	-6.11549
1157	320914	AA881631	RIKEN cDNA A630044M17 gene	A630044M17Rik	1	1.00659	1.01346	1.01361	1.00687	1.01184	1.00607	1.00878		-6.76906	-5.53968	-6.9989	0.964467	0.809762	-4.54929	-6.04506
1158	22070	AI097696	tumor protein, translationally-controlled 1	Tpt1	1	0.980548	1.03978	0.942073	0.823592	1.01569	0.915301	1.08901		-0.816784	-3.78025	-2.25376	0.762912	-3.20581	-6.83904	-1.30968
1159		AW553683			1	1.05477	0.977118	0.989257	1.12553	1.31284	1.33982	1.26824		-2.47167	-5.97252	-1.38126	0.706098	0.999585	0.998628	0.902128
1160	78920	AI326055	dihydrolipoamide S-succinyltransferase (E2 component of 2-oxo-glutarate complex)	Dlst	1	1.10214	1.02815	0.799945	1.0123	0.917504	0.944633	1.05168		-6.24972	0.836206	-0.28049	-0.0822732	-1.23946	-6.95132	-6.942
1161	23881	AI851553	expressed sequence AA409541	AA409541	1	0.879169	0.77058	1.09064	1.10773	0.996902	1.08308	0.970359		0.458618	0.661876	0.0730705	-0.18923	0.866306	-1.3453	-2.08424
1162	12494	AA929177	CD38 antigen	Cd38	1	0.856848	0.848621	0.992869	1.17	1.32631	1.07904	1.15058		0.997116	0.434734	-0.531633	0.40997	0.999904	0.927009	0.999886
1163		AA656606			1	1.17519	0.926935	0.952893		1.2201	1.01943	1.13426		-6.93189	-6.97447	-5.53968	-0.972386	0.948842	0.706098	-5.28299
1164	20250	AA024368	stearoyl-Coenzyme A desaturase 2	Scd2	1	0.926232	1.36016	1.18427	0.963038	1.01412	1.15474	0.952157		-1.3453	-6.37458	-4.02172	-7.00013	-0.64155	-6.86946	0.995781
1165		AV240878			1	0.969405	0.930461	0.950327	1.02962	1.00949	1.15115	1.07893		-0.531633	0.470237	-4.26266	-6.83904	-6.00904	0.994579	-0.877978
1166	27045	AW045778	nitrilase 1	Nit1	1	1.07317	1.05591	1.0346	1.33577	1.37618	1.28681	1.35814		-6.85464	-5.89795	0.795157	0.999598	0.999894	0.998873	0.998873
1167	270584	AA920176	similar to 60S ribosomal protein L23a	na	1	1.00018	0.845609	0.826309	1.13079	0.974448	1.21451	1.15132		-3.6838	-1.06993	0.966431	0.818974	-6.61823	0.995064	-5.23903
1168	66890	AI788956	lectin, mannose-binding 2	Lman2	1	0.932946	1.0001	0.975104	1.12326	1.12749	1.05536	1.10877		-0.558599	-3.92512	-5.41292	0.762912	0.301667	-2.08424	0.226005
1169	20054	AI836869	ribosomal protein S15	Rps15	1	0.971292	0.968233	0.948766	1.06334	1.05354	1.10268	0.924158		-5.53968	-4.73779	-6.34428	-2.516	-5.7825	-1.56611	0.357714
1170	11433	AL024388	acid phosphatase 5, tartrate resistant	Acp5	1	1.04449	1.08904	0.883748	1.29716	1.11167	1.36188	1.15031		-6.11549	-4.21457	-3.25314	0.936264	-0.940568	0.999989	0.970904
1171	16781	AA690187			1	0.860846	0.82249	0.700196	0.795416	1.19416	1.24025	1.32754		-3.87682	0.973312	0.985597	-2.25376	-2.74107	-2.47167	-4.40645
1172	225131	W97169	RIKEN cDNA 1110067P07 gene	1110067P07Rik	1	0.808855	0.794267	0.874283	1.08215	1.08205	1.03456	1.35204		-4.69091	0.964467	0.732681	-5.41292	-5.36995	-3.44365	0.902128
1173	14180	AA623627	fibroblast growth factor 9	Fgf9	1	0.77541	0.6589	1.00502	0.867783	1.03845	1.04847	1.10628		0.470237	0.966431	-1.87879	-5.70325	-6.99034	-6.93189	-3.73201
1174	106869	AW107967	RIKEN cDNA E130304C20 gene	E130304C20Rik	1	1.07803	0.718084	0.56618	0.797455	1.08768	1.15824	1.50169		-5.41292	0.993051	0.948842	-6.34428	-2.21097	-5.4978	-1.68098
1175		AA682023			1	0.87039	0.8471	0.87815	1.11298	1.12507	1.07956	1.1961		-6.82268	0.98063	-0.0217899	-4.73779	-1.52848	-4.40645	-0.145511
1176	12607	AW107708	CCAAT/enhancer binding protein alpha (C/EBP), related sequence 1	Cebpa-rs1	1	0.884722	0.871476	0.662382	0.983779	0.930974	1.07634	1.46622		-4.11823	0.805001	0.996039	-6.86946	-6.04506	-3.49153	0.492844
1177	66889	AA655932	ring finger protein 128	Rnf128	1	0.979945	0.654341	0.782854	1.08567	1.11506	0.934053	0.994318		-5.7431	-7.00013	0.800133	-1.03707	-4.69091	-0.756984	-4.02172
1178		AI020715			1	0.817673	0.803605	0.961279	1.10274	1.01283	0.939502	0.883329		-2.56056	0.762912	-1.71991	-2.56056	-2.21097	0.53561	0.357714
1179	54673	AI020999	SH3-domain GRB2-like B1 (endophilin)	Sh3glb1	1	1.04	0.780652	0.799162	0.877159	0.979902	1.17317	1.09309		-6.11549	0.999457	0.996618	0.481645	-6.56877	0.911959	-6.34428
1180	252876	AA162090	RIKEN cDNA 4930429M06Rik	4930429M06Rik	1	0.843758	0.711619	0.841236	0.849261	0.913701	1.18998	1.24297		-5.7431	0.948842	0.994407	-0.304112	0.818974	-6.92098	-3.01788
1181		AA874621			1	1.08349	0.829159	0.815057	0.871656	1.01945	1.23828	1.49738		-2.9713	0.999714	-4.831	-2.74107	-0.64155	0.999999	0.999399
1182	66588	AA881645	RIKEN cDNA 0610011D08 gene	0610011D08Rik	1	1.00181	0.746145	1.27712	1.10457	1.02139	1.12014	1.32819		-6.90928	-0.28049	-1.4542	-0.211564	-6.83904	0.885488	0.998437
1183	12843	AI849281	procollagen, type I, alpha 2	Col1a2	1	0.954047	0.867561	0.877279	0.849934	1.20462	1.18917	1.49289		-5.93548	-0.669889	-0.37695	-2.00117	-2.87864	0.86284	0.999996
1184	100321	AA199550			1	0.830379	1.07505	0.88248	0.985011	0.871575	0.793827	0.84301		0.56563	-6.95984	0.984251	-5.15021	0.434734	0.998979	0.991384
1185	16480	AA989766	junction plakoglobin	Jup	1	0.927311	0.849147	0.798257	0.886934	0.983233	1.15315	1.13315		-5.01487	0.805001	0.998038	0.805001	-6.46171	0.57526	-1.41756
1186	68658	AA939474	RIKEN cDNA 1110034C16 gene	1110034C16Rik	1	0.832662	0.825906	1.00997	1.13014	0.99848	0.845047	0.819948		-0.0022299	0.986021	0.976232	-6.88352	-1.79873	-4.21457	-4.54929
1187	17178	AA592604	FXYD domain-containing ion transport regulator 3	Fxyd3	1	1.04402	0.773009	0.939808	0.867378	1.07555	1.25341	1.19498		-4.92339	0.611965	0.911959	-4.92339	-2.78673	0.869693	0.525218
1188		AA145226			1	1.06657	0.828412	0.833082	1.32091	0.787938	1.00273	1.0736		-5.93548	-4.96925	0.446784	-4.69091	-4.831	-4.06999	-4.26266
1189	56048	AI987967	lectin, galactose binding, soluble 8	Lgals8	1	1.02126	0.907858	0.684617	0.878756	0.850421	1.25517	1.35105		-0.940568	-4.64386	-2.47167	-5.32663	-3.58754	-3.3006	-5.06025
1190	27981	AW213538	DNA segment, Chr 4, Wayne State University 53, expressed	D4Wsu53e	1	0.965503	0.872047	0.840751	0.982614	0.881088	1.15485	1.0302		-0.352341	-2.34016	0.653967	-6.86946	0.939653	-6.95984	0.545808
1191	192193	AA920260	ER degradation enhancer, mannosidase alpha-like 1	Edem1	1	0.841769	0.724217	0.559189	0.971266	0.99474	1.34517	1.45381		-6.34428	0.999997	0.999999	-6.80556	-2.16845	0.918728	-4.64386
1192	18777	AI510294	lysophospholipase 1	Lypla1	1	1.00426	0.73742	0.88833	0.920839	0.91502	1.05461	1.08757		-6.00904	0.637665	0.492844	-4.59665	-1.30968	-5.23903	-6.99687
1193	13996	AI563639	ethanol decreased 2	Etohd2	1	0.955077	0.724567	0.846032	0.928167	0.911549	1.16794	1.1266		-4.64386	0.982269	0.904676	-6.98586	0.0546813	-5.53968	-5.85994
1194	13996	AI563639	ethanol decreased 2	Etohd2	1	0.872907	1.01893	0.888335	0.995247	1.03917	0.930059	1.25862		0.840276	-6.97447	0.983288	-6.97447	-6.1499	-0.505009	0.840276
1195	18700	AA189964	phosphatidylinositol glycan, class A	Piga	1	0.837496	0.664971	0.74169	0.905616	0.85157	1.21878	1.2154		-6.98057	0.990841	0.999474	-3.01788	-1.00455	-3.5395	-4.8773
1196		AI563656			1	1.10758	1.0353	0.770948	0.879732	1.0788	0.940042	1.10591		-4.35861	-6.93189	0.991384	-6.90928	-4.64386	-6.93189	-4.54929
1197		AA105218			1	0.793779	0.77521	0.595194	0.890787	0.877341	0.87768	1.19993		1	0.999961	0.999997	0.795157	-5.7825	0.53561	0.0911733
1198		AI313904			1	1.04967	0.687969	0.732454	0.866644	1.12056	1.26742	1.25644		-6.00904	0.989338	0.959078	-2.83259	-3.73201	0.226005	-0.18923
1199	12848	AW146432	COP9 (constitutive photomorphogenic) homolog, subunit 2 (Arabidopsis thaliana)	Cops2	1	0.94638	0.635922	0.855992	1.46062	1.01717	1.22414	1.21103		-6.95132	0.823428	-0.877978	0.876234	-6.46171	0.545808	0.980053
1200	55980	AW321594	inositol (myo)-1(or 4)-monophosphatase 1	Impa1	1	0.810143	0.945902	0.889883	1.17477	1.03893	1.06006	1.01664		0.470237	0.0546813	-0.427166	-5.41292	-3.87682	-5.89795	-1.75916
1201	11877	AA498261	armadillo repeat gene deleted in velo-cardio-facial syndrome	Arvcf	1	1.22618	0.759691	1.05306	0.745737	0.931055	0.813699	0.874067		0.637665	0.911959	-5.53968	0.809762	-2.69562	0.0546813	0.226005
1202	19766	AA967070	receptor (TNFRSF)-interacting serine-threonine kinase 1	Ripk1	1	0.944018	0.81188	0.855259	0.954634	0.957147	1.16951	1.30479		-4.69091	0.981192	-6.90928	-4.26266	-6.64193	0.0170336	0.706098
1203	218236	AA967108	cDNA sequence BC010304	BC010304	1	1.14936	1.19801	1.01556	1.34088	0.929602	0.797114	0.670266		-2.65038	-2.38374	-6.98586	0.928954	-2.04256	-6.80556	-6.92098
1204	22003	AA266471	tropomyosin 1, alpha	Tpm1	1	0.963188	0.775777	0.764551	0.996782	0.993715	0.95507	1.17591		-6.97447	0.979459	0.840276	-6.95132	-0.211564	-2.87864	-6.64193
1205		AW211695			1	0.918676	0.80702	1.15023	0.943646	1.00097	1.17761	1.19392		-6.34428	-6.56877	-2.38374	-6.1499	-5.85994	0.645898	-2.83259
1206	18976	AW047262	pro-opiomelanocortin-alpha	Pomc1	1	1.00799	1.00273	1.07021	1.18108	1.16845	1.31422	1.26158		-7.00054	-5.62228	-6.942	0.998582	0.957912	0.999997	0.999976
1207	14705	AA980499	Bernardinelli-Seip congenital lipodystrophy 2 homolog (human)	Bscl2	1	0.92759	0.864405	0.922332	1.06076	1.25653	1.03945	0.907048		-4.06999	-0.103043	0.851946	-4.54929	-2.34016	-0.756984	-1.38126
1208	21917	AI195756	thymopoietin	Tmpo	1	1.00022	1.02162	1.04421	1.46503	1.79403	1.88596	2.09991		-0.909098	-3.15861	-5.4978	1	1	1	1
1209	12499	AA467416	ectonucleoside triphosphate diphosphohydrolase 5	Entpd5	1	1.08972	0.909468	0.742115	0.91441	1.00985	1.12121	1.22307		-6.70875	-0.505009	-1.3453	-5.58118	-2.83259	0.894106	0.397251
1210		AA462408			1	0.792838	0.777548	1.03457	1.14513	0.99763	0.864347	0.881313		0.56563	0.706098	0.962396	-5.89795	-1.64237	-1.2744	-3.20581
1211	78070	AI036804	carnitine palmitoyltransferase 1c	Cpt1c	1	1.1905	0.965223	0.830666	1.11864	1.12138	1.37752	1.61484		-5.36995	-6.83904	-2.42758	-4.16643	0.998945	1	1
1212		AI851638			1	1.03709	0.92189	0.582663	1.17928	0.811324	0.966662	0.866849		-0.816784	0.955487	0.997908	-1.06993	-6.18374	-3.63564	-3.44365
1213	19240	AI157351	thymosin, beta 10	Tmsb10	1	0.902822	0.858869	0.944051	1.11744	0.977801	1.11989	0.973962		-3.58754	-3.34818	-5.97252	-4.11823	-6.56877	-6.34428	-2.21097
1214	11883	AI006214	arylsulfatase A	Arsa	1	0.762441	0.79553	0.937171	1.05163	1.02383	1.03926	0.868575		0.977576	0.458618	-1.23946	-4.06999	-6.96756	-6.70875	-6.51657
1215	20778	AI037085	scavenger receptor class B, member 1	Scarb1	1	0.969812	0.813668	0.905179	1.03564	0.959744	1.10389	1.1219		-2.69562	0.970904	0.525218	-5.32663	-6.89679	-1.49117	-0.124122
1216	17283	AA000099	multiple endocrine neoplasia 1	Men1	1	0.639795	0.773759	0.746867	1.19592	0.917719	1.07688	1.3142		0.99738	0.653967	0.434734	-1.4542	-1.4542	-6.28184	-4.92339
1217	76709	AA881633	actin related protein 2/3 complex, subunit 2	Arpc2	1	1.02213	1.02647	0.80733	0.910845	1.07647	1.06184	1.22389		-6.942	-5.10536	0.998101	-0.909098	0.997207	-0.0217899	-0.28049
1218	13627	AA869506	eukaryotic translation elongation factor 1 alpha 1	Eef1a1	1	0.815351	0.833648	0.783099	1.07106	1.20638	1.17069	1.18229		0.629268	0.805001	0.996926	-4.5018	0.840276	0.706098	0.823428
1219	67095	AW259587	RIKEN cDNA 2310001H13 gene	2310001H13Rik	1	0.759998	0.834737	1.13923	1.46146	1.62317	2.04412	2.16003		0.963446	0.0546813	-3.58754	0.999874	1	1	1
1220	56455	AU080559	dynein, cytoplasmic, light chain 1	Dnclc1	1	0.918855	0.931354	0.895525	1.24069	1.14237	1.41885	1.29166		-5.70325	-6.76906	-1.4542	0.936264	0.999075	0.999995	0.999993
1221	12827	AA041615	procollagen, type IV, alpha 2	Col4a2	1	0.80374	0.895366	0.802382	1.16334	1.24195	1.12733	1.37497		0.914271	0.795157	0.932701	-0.167213	0.999625	0.954226	0.999997
1222	68003	AI843892	RIKEN cDNA 3110001O07 gene	3110001O07Rik	1	0.923285	0.924563	0.876134	1.09331	0.965335	1.1854	1.11438		-6.98057	0.74516	0.458618	-6.98057	-6.43331	-2.21097	0.661876
1223		AA002947		ESTs, Weakly sim	1	1.0614	0.986231	1.05091	1.24991	1.07064	1.01814	1.36689		-6.89679	-2.65038	0.653967	0.999314	0.997974	0.999988	0.999996
1224	14705	AI047345	Bernardinelli-Seip congenital lipodystrophy 2 homolog (human)	Bscl2	1	0.962063	1.01997	0.776374	0.999061	1.20636	1.07184	1.46627		-6.90928	0.620702	0.918728	-2.1262	0.814419	0.805001	0.999997
1225	13717	AI385539	elastin	Eln	1	1.12649	0.901509	0.716714	0.937569	0.787595	1.1034	0.873453		-2.16845	-6.43331	-1.68098	-4.73779	-2.47167	-6.00904	-0.257192
1226	27981	AA939583	DNA segment, Chr 4, Wayne State University 53, expressed	D4Wsu53e	1	0.882437	0.834716	0.944056	1.08346	0.934162	1.0792	1.14922		0.795157	0.999985	-1.96008	-5.7825	-4.831	0.458618	0.836206
1227	13418	AI508253	DnaJ (Hsp40) homolog, subfamily C, member 1	Dnajc1	1	0.821744	0.87599	0.981788	0.967375	1.04671	1.25207	1.49783		-0.909098	-2.9713	-5.97252	-6.70875	-5.58118	-0.558599	0.939653
1228	22287	W13046	secretoglobin, family 1A, member 1 (uteroglobin)	Scgb1a1	1	0.92267	0.816311	0.85946	1.16089	0.957874	1.11216	1.17238		0.823428	0.999996	-5.45554	0.434734	-7.00013	0.999457	0.988326
1229	19309	W78550	muscle glycogen phosphorylase	Pygm	1	1.02189	0.826397	1.03059	1.03842	0.972574	1.12401	1.0528		0.961319	0.999989	-0.756984	-4.40645	-1.3453	0.996827	-3.82853
1230		W76735			1	0.872602	0.878692	0.82681	1.01477	1.03425	1.22072	1.1547		-0.669889	0.669626	0.955487	-3.11155	-4.8773	0.677222	0.930851
1231	12874	AA198901	carboxypeptidase D	Cpd	1	0.923977	0.773595	0.98886	0.994313	1.13696	1.31002	1.32514		-6.59384	0.869693	-0.585906	-2.34016	0.983776	0.998038	0.999693
1232	15463	AA049862	HIV-1 Rev binding protein	Hrb	1	0.8939	0.83261	0.963766	1.15875	0.992877	0.956261	1.14264		0.0360032	0.896844	0.984251	-2.78673	0.994579	-5.4978	-6.61823
1233	20405	AI315075	SH3-domain GRB2-like 1	Sh3gl1	1	0.936516	0.95952	0.848986	0.934533	0.975179	1.03986	1.38876		0.555814	-0.756984	-1.38126	-4.31068	0.888429	0.458618	0.784872
1234		AI593980			1	0.867339	1.02074	0.712924	1.16805	0.908255	1.03806	1.24967		-2.16845	-0.145511	0.992609	-1.1367	-3.5395	-5.82145	-2.25376
1235	11947	AI845222	ATP synthase, H+ transporting mitochondrial F1 complex, beta subunit	Atp5b	1	0.937645	0.832983	0.741768	0.934295	1.08229	1.11483	1.39648		0.916527	0.584705	0.997695	-4.96925	0.832042	0.980053	0.99989
1236	18521	AW412548	poly(rC) binding protein 2	Pcbp2	1	0.929969	1.11143	0.79726	1.26134	1.05288	1.33525	1.15901		-6.68719	-6.68719	-2.1262	0.997116	-2.60536	0.999336	0.979459
1237	12314	AA087146	calmodulin 2	Calm2	1	0.983725	0.896067	0.777726	1.05329	0.940606	1.17659	1.24974		-3.92512	0.93798	-1.75916	-5.7431	-0.211564	0.885488	0.712953
1238	21959	AA144925	transition protein 2	Tnp2	1	0.97659	1.00926	0.964789	1.06695	1.11958	1.2312	1.10537		-0.877978	-6.98586	-6.88352	-1.20486	0.503838	0.997207	0.75712
1239		AA033187			1	0.859864	0.85621	0.849401	1.09651	1.00632	1.20394	1.26108		0.932701	0.994048	0.971728	0.584705	-3.01788	0.998038	0.999782
1240		AV047620			1	0.998202	0.903009	0.8824	1.04444	0.889278	1.16784	1.07245		-6.98057	0.774129	0.836206	-6.04506	-2.16845	0.823428	-0.234217
1241	11434	AI644079	preproacrosin	Acr	1	0.822011	0.760508	0.88634	1.14917	1.03919	1.07754	1.15961		0.620702	0.999075	0.997974	-5.82145	0.160774	-0.478723	-0.328062
1242	20916	AI527924	succinate-Coenzyme A ligase, ADP-forming, beta subunit	Sucla2	1	0.903708	0.84169	0.855345	1.00764	1.05031	1.13408	1.2477		0.998945	0.997207	0.974812	-3.20581	-3.34818	0.998101	0.999999
1243	17246	AI596041	transformed mouse 3T3 cell double minute 2	Mdm2	1	0.817648	0.816136	0.812377	1.23682	1.17934	1.19613	1.41121		0.999782	0.999358	0.344064	0.999822	1	0.998979	1
1244	78294	AI156833	ribosomal protein S27a	Rps27a	1	1.00852	0.946518	0.835545	1.07291	1.02337	1.00039	0.972904		-6.92098	0.481645	0.998873	-1.10315	-6.04506	-5.41292	-6.70875
1245	71852	AL034666	RIKEN cDNA 1700024N20 gene	1700024N20Rik	1	0.892898	0.915755	0.727799	1.09658	1.2818	1.29356	1.7406		0.997908	0.344064	0.732681	-0.452776	0.99999	0.999999	1
1246	57294	AA597118	ribosomal protein S27	Rps27	1	0.993956	0.922776	0.727756	1.14812	1.20471	1.35942	1.3549		-6.04506	0.882476	0.999981	0.987601	0.99999	1	1
1247	12785	AV017620	cellular nucleic acid binding protein	Cnbp	1	1.04327	0.996859	0.935302	1.22316	1.04477	1.15567	1.23642		-5.53968	-6.24972	0.470237	0.981738	-2.16845	0.974072	0.999683
1248	27360	AA267347	adducin 3 (gamma)	Add3	1	0.811286	0.845417	0.866444	1.2547	1.14846	1.14676	1.19077		0.998628	0.975532	0.993263	0.0911733	0.944423	0.998672	0.999989
1249	24018	AI931926	RNA guanylyltransferase and 5'-phosphatase	Rngtt	1	0.919371	0.740862	0.791856	0.768722	1.12787	1.38285	1.14763		-5.70325	0.999612	0.999945	0.964467	-0.234217	0.997839	0.879392
1250	66542	AW045905			1	0.924105	1.09161	0.796723	1.19891	0.989291	1.06419	1.2387		-0.877978	-6.70875	0.241651	0.397251	-0.427166	-1.06993	0.956715
1251	57319	AA538329	sphingomyelin phosphodiesterase, acid-like 3A	Smpdl3a	1	1.07587	0.840745	0.860295	0.90997	0.97915	1.1221	1.13732		-0.234217	0.999985	-1.49117	0.992834	0.59397	0.999999	0.999963
1252		AA473030			1	1.12297	0.989068	0.589526	1.17995	0.980092	1.21059	1.25443		-6.90928	0.272167	-4.21457	0.977576	0.14379	0.177484	0.287042
1253	14057	AA111089	sideroflexin 1	Sfxn1	1	1.06723	0.80047	0.844532	1.06592	1.19919	1.50924	1.33775		-5.93548	0.920875	0.620702	-0.452776	0.999986	1	0.991384
1254	16783	AA896274	lysosomal membrane glycoprotein 1	Lamp1	1	0.956495	0.898609	0.781762	1.1551	1.03589	1.01507	1.03731		-3.78025	-5.15021	-0.328062	0.768581	-0.28049	-3.6838	-0.0217899
1255		AW106850			1	1.21282	0.813007	0.69344	1.10618	0.931027	1.11853	1.05822		-2.92488	0.160774	-3.39587	-6.88352	-4.8773	-6.82268	-4.06999
1256	231329	AW260260	polymerase (RNA) II (DNA directed) polypeptide B	Polr2b	1	1.06324	0.757933	0.656404	1.3578	0.853901	1.05354	1.11655		-6.72959	0.941284	0.0170336	-6.98586	-6.61823	-6.90928	-3.92512
1257	68028	AV005103	RIKEN cDNA 3110001N18 gene	3110001N18Rik	1	1.15821	0.800266	0.903037	1.50008	1.43894	1.59678	1.5576		-4.35861	0.629268	-5.01487	0.999987	0.999999	1	1
1258	320585	AW413176	RIKEN cDNA 5730405G21 gene	5730405G21Rik	1	0.901173	0.742676	0.829637	1.14136	1.10472	1.28653	1.35284		-3.82853	0.999928	0.12653	0.994745	-0.452776	-0.0822732	0.999999
1259	22668	AW209166	zinc finger protein 162	Zfp162	1	1.12824	0.871866	0.912929	0.758605	0.925143	1.08519	0.98199		-5.85994	-1.68098	0.918728	0.492844	-3.5395	-4.5018	-7.00013
1260		AA549592			1	1.00666	0.957727	0.997847	1.01876	1.09866	0.917719	1.13986		-6.28184	-6.95984	0.991116	-6.00904	-2.83259	-6.59384	0.998582
1261	26931	AA545140	protein phosphatase 2, regulatory subunit B (B56), gamma isoform	Ppp2r5c	1	0.790717	0.885095	0.830361	1.17772	1.03883	1.18573	1.22608		0.999979	0.726242	0.998385	-0.698574	0.357714	0.999822	0.999969
1262	14339	AI323872	fused toes	Fts	1	0.881525	0.985419	0.930202	1.40718	1.27177	1.49841	1.54604		0.932701	-5.7431	-6.66492	0.999966	1	1	1
1263		AU080328			1	0.778394	0.804776	0.927026	1.33163	1.03054	0.968779	1.0203		0.999162	0.99762	0.999855	0.108992	0.371126	0.160774	0.726242
1264	83768	AI536254	dipeptidylpeptidase 7	Dpp7	1	0.744181	0.814763	0.888637	1.08052	1.07166	1.15571	1.17572		0.998909	0.86284	0.970904	-3.58754	-1.71991	-0.18923	0.226005
1265	21769	AA017769	testis expressed gene 27	Tex27	1	0.841511	0.878652	0.819749	0.95229	1.02179	1.01355	0.940141		0.997022	-1.03707	0.999975	-6.51657	-0.37695	-1.17061	0.193925
1266		AA260588	expressed sequence AA407659	AA407659	1	0.882543	0.841447	0.791006	0.989807	0.973042	1.19064	1.25413		0.397251	0.876234	0.987601	-2.21097	0.357714	0.160774	0.948842
1267	11837	AA221581	acidic ribosomal phosphoprotein P0	Arbp	1	0.95544	1.05274	0.949317	1.28943	1.15581	1.16331	1.10073		-6.80556	-1.2744	-2.34016	0.999987	0.997116	0.999693	0.99919
1268		AA511851			1	1.13732	1.07881	0.764976	1.30912	1.12496	1.50589	1.25231		-0.124122	-1.3453	-2.08424	0.999758	0.948842	0.976913	0.981738
1269	66199	AA268590	RIKEN cDNA 1110039H05 gene	1110039H05Rik	1	1.03332	1.03436	0.94021	1.1731	1.09918	1.12132	1.1414		-6.9989	-6.08054	0.855661	0.525218	-5.36995	0.975532	0.999939
1270	27632	W59452	RD RNA-binding protein	Rdbp	1	0.962441	0.929431	0.97296	1.10811	0.948327	1.00215	0.946979		-2.29683	-1.75916	0.999988	0.902128	0.885488	-2.42758	-1.38126
1271	104836	AA420414	Casitas B-lineage lymphoma-like 1	Cbll1	1	0.827031	0.84973	0.706281	0.961466	1.18826	0.856763	1.325		-3.15861	-6.98057	0.985161	-3.20581	-3.49153	0.525218	0.241651
1272		AA387675			1	0.955864	1.17909	1.24515	0.927374	0.973028	0.928957	0.861831		-6.82268	-6.56877	-6.76906	-5.32663	-5.41292	-4.96925	-5.97252
1273	19034	AI526562	hypothetical peptidylprolyl isomerase A, psuedogene	LOC19034	1	0.964932	1.01414	0.98239	1.08637	1.14924	1.07833	1.15293		-5.28299	-4.35861	-0.0022299	0.981192	0.969186	-1.56611	0.0911733
1274	246791	AA537064	oocyte specific homeobox 3	Obox3	1	0.881757	0.949198	0.7484	1.09815	0.964357	0.927871	1.20607		0.40997	0.981738	0.939653	0.751204	-6.08054	-6.37458	0.851946
1275	14421	AA671871	UDP-N-acetyl-alpha-D-galactosamine:(N-acetylneuraminyl)-galactosylglucosylceramide-beta-1, 4-N-acetylgalactosaminyltransferase	Galgt1	1	0.891949	0.888047	0.969424	0.898532	0.972897	0.868239	0.916153		0.991644	0.848145	-4.73779	0.645898	-6.54301	-3.11155	0.963446
1276	67443	AI182370	microtubule-associated protein 1 light chain 3	Map1lc3	1	0.8127	0.821732	0.741561	1.02403	1.0265	1.0663	1.13815		0.934505	-0.304112	0.795157	-4.8773	-3.58754	-5.58118	-4.96925
1277		AA472250			1	0.886237	1.10576	1.02965	1.17885	1.09982	1.46738	0.88094		-6.66492	-7.00013	-0.478723	-4.73779	-6.82268	-0.585906	-3.01788
1278	14073	AW320175	fatty acid amide hydrolase	Faah	1	0.889415	0.836182	0.977604	1.33102	1.23377	1.29532	1.46393		-0.816784	-1.41756	-2.04256	0.955487	0.978849	1	0.999999
1279	67078	AI594505	RIKEN cDNA 1700012G19 gene	1700012G19Rik	1	1.14808	1.02539	0.944101	1.02662	1.00378	1.15136	1.21053		-2.08424	-4.35861	-5.85994	-4.73779	-4.69091	0.999928	0.985161
1280	14131	AA537570	Fc receptor, IgG, low affinity III	Fcgr3	1	1.05442	0.876945	0.870983	1.12576	1.13438	1.13001	1.11658		-6.98586	-1.10315	0.956715	0.738986	-1.1367	0.653967	-0.0618092
1281	18356	AA537147	olfactory receptor 56	Olfr56	1	1.09727	0.790051	0.935237	1.11007	0.971598	1.16664	1.13777		-3.49153	0.945934	-5.93548	-2.42758	-5.7825	0.844255	-2.87864
1282	20333	AI503634	SEC22 vesicle trafficking protein-like 1 (S. cerevisiae)	Sec22l1	1	0.920953	0.883488	0.931401	1.11952	1.00112	1.14384	1.25619		-2.00117	0.0546813	-0.0217899	0.885488	-2.25376	-1.64237	0.994579
1283	16952	AA592231	annexin A1	Anxa1	1	0.984772	0.99027	0.745696	1.08311	1.11622	1.20818	1.22163		-0.64155	-1.00455	0.954226	-4.5018	-0.124122	0.996827	0.979459
1284	234671	AA734872	carboxylesterase 2	Ces2	1	1.32767	1.29796	1.21129	1.41325	1.24547	1.46267	1.19864		0.961319	0.344064	0.987223	0.999998	0.999492	0.999965	0.986833
1285		AA656263			1	0.934168	0.836559	0.80753	1.13096	1.0589	1.14515	1.34095		-6.08054	0.330175	0.934505	-0.816784	-6.51657	-0.401891	0.916527
1286		AA638610			1	0.979974	0.93955	0.704932	1.10769	0.891689	1.19421	1.36611		-6.21702	-2.1262	0.866306	-2.74107	-1.52848	-3.39587	-1.87879
1287	15944	AI663521	interferon inducible protein 1	Ifi1	1	0.848253	1.03344	0.598748	1.1242	0.966105	1.188	1.22131		-6.97447	-3.92512	0.818974	-2.78673	-5.41292	-6.96756	-3.63564
1288	16785	AA718267	laminin receptor 1 (ribosomal protein SA)	Lamr1	1	0.849804	1.0108	0.828031	1.62437	1.29388	1.30922	1.59959		0.980053	-6.28184	-1.4542	0.999997	1	1	1
1289	20733	AW229298	serine protease inhibitor, Kunitz type 2	Spint2	1	0.774685	0.877825	0.943205	1.34562	1.25344	1.48398	1.38974		0.998038	-0.103043	-0.234217	0.999922	1	1	0.999999
1290	20850	AA763337	signal transducer and activator of transcription 5A	Stat5a	1	0.958157	0.934938	0.918154	1.15303	1.08436	1.30636	1.22571		-6.942	-2.92488	0.885488	0.992379	-1.41756	0.99987	0.986833
1291	14999	AA762381	histocompatibility 2, class II, locus Mb1	H2-DMb1	1	1.44974	0.987531	0.990128	1.93194	0.982003	1.39826	1.60722		0.998101	-6.04506	-6.86946	0.999954	0.818974	0.999978	1
1292	66060	AI316065	RIKEN cDNA 0610010O12 gene	0610010O12Rik	1	1.18115	1.02183	0.826852	1.42637	1.14217	1.7472	1.56877		0.879392	-6.89679	-1.96008	0.994048	-0.78671	1	1
1293	57431	AI180850	DnaJ (Hsp40) homolog, subfamily C, member 4	Dnajc4	1	0.861344	0.88734	0.769205	1.03011	1.01707	1.06176	1.24798		-4.54929	-0.727605	0.989965	-6.90928	0.14379	-4.31068	0.384304
1294	56070	AW106188	transcription elongation regulator 1 (CA150)	Tcerg1	1	0.840604	0.860807	0.953956	1.17653	1.08934	1.28901	1.45886		-0.103043	0.397251	0.95024	0.210097	-0.505009	1	1
1295	108147	AA272422	5-aminoimidazole-4-carboxamide ribonucleotide formyltransferase/IMP cyclohydrolase	Atic	1	1.26537	0.92598	0.754079	0.993452	0.941863	1.03796	1.02618		-5.66298	-7.00013	-2.1262	0.899518	-0.478723	-2.38374	-4.73779
1296	226414	AI181688	aspartyl-tRNA synthetase	Dars	1	1.00122	0.840416	0.733321	1.05117	1.00876	1.18792	1.22444		-0.452776	0.193925	0.932701	-1.91929	-6.99687	0.738986	-0.427166
1297	14229	AI180957	FK506 binding protein 5	Fkbp5	1	0.987645	1.04238	0.830839	1.01858	1.05095	1.23169	1.30289		0.470237	-6.56877	0.492844	-4.40645	0.975532	0.999999	0.999998
1298	11308	AI037401	spectrin SH3 domain binding protein 1	Ssh3bp1	1	0.848247	0.79892	0.741042	1.12601	1.13943	1.22856	1.12996		-1.1367	0.964467	0.90959	-2.38374	-2.42758	0.669626	-0.478723
1299	17436	AI037787	malic enzyme, supernatant	Mod1	1	0.898292	0.993294	1.2495	1.02551	0.912653	1.02484	0.952864		-0.124122	-0.613556	-1.64237	-6.80556	-2.65038	0.899518	-6.21702
1300	67996	AI060744	splicing factor, arginine/serine-rich 6	Sfrs6	1	0.855609	0.765662	1.09482	1.19399	1.09788	1.06616	1.01119		0.492844	0.982269	0.86284	-4.73779	0.936264	0.882476	-0.352341
1301	23880	AA756642	FYN binding protein	Fyb	1	1.24795	0.945382	0.696859	1.15867	0.793673	1.16164	0.740207		-1.75916	-6.48947	0.193925	-5.19477	-1.79873	-3.15861	-0.0416489
1302		AL022646			1	0.977478	0.679853	0.704755	1.25486	0.929549	1.09327	0.985455		-6.96756	0.914271	-4.02172	-4.35861	-5.58118	-4.59665	-1.38126
1303	15108	AW111486	hydroxyacyl-Coenzyme A dehydrogenase type II	Hadh2	1	0.988795	0.912961	1.01126	0.854927	0.789745	0.739765	0.762128		-6.66492	-0.0217899	-4.16643	-0.452776	0.922971	0.997768	0.997022
1304	76855	AI316766			1	0.938444	0.738634	0.924704	1.16301	0.937748	1.19285	1.15325		-6.98586	0.997908	-0.669889	0.876234	-2.29683	-0.401891	0.525218
1305	67963	W10909	Niemann Pick type C2	Npc2	1	0.960644	1.07012	1.04521	1.06532	1.05853	1.29705	1.16672		-5.82145	-5.70325	-6.56877	0.301667	0.108992	0.999886	0.964467
1306	21334	W11882	tachykinin 2	Tac2	1	1.02372	0.829782	0.719765	1.07325	0.761406	1.05563	1.05697		-6.61823	-1.1367	0.941284	-6.28184	0.738986	-2.78673	-6.21702
1307	56318	AI324033	acid phosphatase, prostate	Acpp	1	0.864541	1.02084	0.750872	0.93216	1.03899	1.1698	0.889852		-5.85994	-6.40426	0.980053	-5.7431	-6.51657	-1.06993	-4.06999
1308		W15662			1	1.14636	1.02203	0.663056	1.03463	0.831184	1.01754	1.09429		-5.06025	0.226005	0.995064	-5.4978	-0.0022299	-6.90928	-6.11549
1309	213393	AI385607	RIKEN cDNA 8430408G22 gene	8430408G22Rik	1	2.79896	1.34213	1.38389	1.13867	0.812578	1.05633	0.814474		0.999935	-1.1367	-1.87879	-5.10536	-3.44365	-6.80556	-3.20581
1310		AI893908			1	0.991636	0.708383	0.749719	0.885649	0.952383	1.29697	1.19115		-5.45554	0.973312	0.93798	-1.41756	-4.40645	0.555814	-0.940568
1311	20674	W35076	SRY-box containing gene 2	Sox2	1	0.880316	0.969276	0.883313	1.23536	0.999958	1.06713	1.24558		0.74516	-6.96756	0.545808	0.53561	-2.516	0.779559	0.941284
1312	13591	W40683	early B-cell factor 1	Ebf1	1	0.950956	0.777951	1.0223	0.98029	1.03099	1.05518	1.26245		-5.82145	0.993667	1	-0.531633	-4.96925	0.956715	0.998909
1313		AI385633			1	0.901387	0.840741	0.960953	1.12498	0.961833	1.08613	1.07729		0.882476	0.999525	0.999996	0.774129	-5.19477	0.999598	-0.613556
1314	20401	AI893960	SH3-domain binding protein 1	Sh3bp1	1	0.803241	0.851756	0.90708	0.995402	1.01589	1.15399	1.28715		-2.78673	-5.82145	0.999886	-5.66298	-5.7431	0.620702	0.879392
1315	16869	W80180	LIM homeobox protein 1	Lhx1	1	0.724424	0.879194	0.896993				0.933756
1316	12445	W53383	cyclin D3	Ccnd3	1	0.757476	0.861905	0.910925	1.26537	1.33864	1.55087	1.45589		0.800133	0.79007	0.0170336	-0.64155	0.990558	1	1
1317	72401	W59204	solute carrier family 43, member 1	Slc43a1	1	0.818405	0.887813	0.775838	0.872021	0.900117	0.692881	0.706966		-1.71991	-0.328062	0.99919	0.805001	0.996618	0.999997	0.999939
1318	64011	AA014757	neurogranin	Nrgn	1		1.28247					2.83561
1319	229279	AI527912	RIKEN cDNA 2610510D13 gene	2610510D13Rik	1	1.1989	0.778115	0.660375	1.12999	0.934	1.17689	1.15454		-4.78449	-0.698574	0.98063	-6.9989	-4.45418	-3.06464	-6.21702
1320	14065	AI425720	coagulation factor II (thrombin) receptor-like 3	F2rl3	1	0.827064	0.79922	1.0704	1.16518	1.08437	0.912334	0.869008		-5.97252	-4.40645	0.942873	-4.5018	-5.15021	-6.97447	-6.942
1321	18538	AI325898	proliferating cell nuclear antigen	Pcna	1	0.875937	0.963286	0.980454	0.921443	1.29254	1.34003	1.29232		-4.54929	-2.1262	-4.92339	-6.59384	0.932701	0.999904	0.99984
1322	11757	W91307	peroxiredoxin 3	Prdx3	1	0.863741	0.8938	0.826647	1.2536	1.1452	1.35286	1.44782		-0.847206	-0.698574	-6.00904	0.999845	0.997022	0.992834	0.993263
1323	19156	AI894343	prosaposin	Psap	1	0.887826	0.919774	0.879651	0.929695	0.949541	1.19754	1.14387		0.12653	-4.96925	-1.2744	-6.18374	-3.44365	-3.44365	-4.96925
1324	19038	AW475697	peptidylprolyl isomerase C	Ppic	1	0.827413	0.764804	0.865134	1.09981	0.946472	1.15188	1.38438		0.999803	0.988326	0.998161	-2.516	0.53561	0.859292	0.996397
1325	14082	AI385705	Fas (TNFRSF6)-associated via death domain	Fadd	1	1.0541	0.845074	1.02175	0.942391	0.942506	1.16793	1.09505		-3.58754	-1.64237	-0.505009	-5.06025	-6.66492	0.941284	-2.16845
1326	26414	AI893985	mitogen activated protein kinase 10	Mapk10	1	0.894099	0.831224	0.833212	1.22652	1.02857	1.08629	1.03622		0.434734	0.434734	0.876234	0.661876	-6.08054	-1.52848	-2.16845
1327	97977	W97442	expressed sequence C81508	C81508	1	0.93826	0.882772	1.00256	0.923762	0.955996	1.12178	1.12033		-5.62228	0.434734	0.684664	-3.3006	-4.16643	0.40997	0.907163
1328	22694	AI893996	zinc finger protein 35	Zfp35	1	0.995381	0.775954	0.915731	1.05997	0.971332	1.0674	0.927867		0.470237	0.719667	0.397251	-3.01788	-5.01487	-3.97343	-3.11155
1329		AA840185			1	1.12373	0.869068	0.673757	1.11735	0.758121	0.992473	0.831824		-2.92488	-0.37695	0.927009	-5.45554	-1.23946	-1.75916	0.637665
1330	22355	AI894015	vasoactive intestinal peptide receptor 2	Vipr2	1	0.962458	0.888563	0.905545	1.31728	1.19649	1.21052	1.42075		0.6991	0.706098	-2.56056	0.999999	1	1	1
1331	17355	AA013505	homolog of human MLLT2 unidentified gene	Mllt2h	1	0.895803	0.934769	1.01149	0.895521	0.967255	1.04901	1.08581		-6.92098	-1.60408	0.999598	-6.43331	-4.73779	-1.41756	-6.9989
1332	11350	AI508191	v-abl Abelson murine leukemia oncogene 1	Abl1	1	1.09039	1.27906	1.07534	1.19003	0.980779	0.953989	0.992698		0.344064	-6.56877	0.481645	0.967374	0.603055	0.653967	0.956715
1333	11747	AA002439	annexin A5	Anxa5	1	1.0089	1.01189	0.973914	1.294	1.22241	1.43805	1.25745		-4.31068	-5.89795	-3.82853	0.999999	0.999803	1	0.99999
1334	70350	AW545587	brain abundant, membrane attached signal protein 1	Basp1	1	0.871248	0.903925	0.946245	1.1347	1.24746	1.43171	1.51154		0.991384	0.371126	0.0546813	0.99954	0.999999	1	1
1335	17869	AA009268	myelocytomatosis oncogene	Myc	1	0.690612	0.771144	0.986384	1.00511	1.40602	1.23346	1.49597		0.978221	0.584705	-1.64237	-5.19477	0.987969	-0.37695	0.991896
1336	16653	AI322494	Kirsten rat sarcoma oncogene 2, expressed	Kras2	1	0.842589	0.896607	0.993467	1.28803	1.2813	1.3109	1.31603		0.998385	0.925015	0.998909	0.999999	1	1	1
1337	13982	AI325343	estrogen receptor 1 (alpha)	Esr1	1	0.900455	0.751792	0.796132	1.12955	0.913704	1.1199	1.15123		0.160774	0.999474	0.999999	0.691956	-6.59384	-0.940568	-4.31068
1338		AI324139			1	0.906892	0.846732	0.849068	1.03438	1.06966	1.34392	1.24142		0.960213	-2.60536	0.991896	-0.64155	0.6991	0.999625	0.998715
1339	16453	AI323318	Janus kinase 3	Jak3	1	0.818543	0.876318	1.0112	1.26353	0.922766	1.23522	0.879583		0.514628	0.397251	0.965462	-1.10315	-5.23903	0.210097	-6.7497
1340	19359	AI324182	RAD23b homolog (S. cerevisiae)	Rad23b	1	0.943816	1.00567	0.77659	0.965467	1.04564	1.1318	1.00868		-0.972386	-1.30968	0.177484	-6.24972	-6.95984	-3.6838	-2.29683
1341	12575	AI323806	cyclin-dependent kinase inhibitor 1A (P21)	Cdkn1a	1	1.2059	0.804368	0.844697	1.24546	1.69206	4.55907	3.53851		-3.20581	-2.42758	-3.25314	-2.16845	0.936264	1	1
1342	26413	AI323208	mitogen activated protein kinase 1	Mapk1	1	1.11168	0.981969	0.804283	0.998227	1.06083	1.33497	1.16581		0.12653	-6.48947	0.969186	0.920875	-2.38374	0.999998	0.972531
1343	20599	AI322792	submaxillary gland androgen regulated protein 1	Smr1	1	1.00997	1.02349	0.878829	1.00815	0.94628	1.04469	1.1775		-4.96925	-5.15021	0.999983	-0.558599	-3.63564	-2.516	0.996281
1344	14715	AI286577	gonadotropin releasing hormone receptor	Gnrhr	1	0.779688	0.963029	0.898499	0.953249	1.3067	1.18044	1.28254		-0.28049	-0.613556	-0.401891	-6.95984	0.684664	0.800133	0.272167
1345	18979	W17967	paraoxonase 1	Pon1	1	1.01899	0.923249	0.889859	0.840979	0.98496	1.00542	1.17321		0.79007	-6.89679	-6.66492	-3.5395	-6.942	-1.17061	0.287042
1346	54141	AI385608	sperm associated antigen 5	Spag5	1	0.846024	0.982267	0.938974	1.0507	1.03318	1.2187	1.3484		-1.83861	-3.92512	-6.86946	-5.53968	-5.62228	0.907163	0.99929
1347	54141	AI385608	sperm associated antigen 5	Spag5	1	0.849035	0.845877	0.942836	1.10522	0.947174	1.04706	1.27103		-5.23903	-3.3006	-6.9989	-5.19477	-6.92098	-4.31068	0.955487
1348	22025	W36063	nuclear receptor subfamily 2, group C, member 1	Nr2c1	1	0.915795	0.93089	0.858577	1.0396	0.937136	1.1973	1.2677		-1.83861	-4.45418	0.669626	-4.02172	-2.65038	0.985597	0.784872
1349	22025	W36063	nuclear receptor subfamily 2, group C, member 1	Nr2c1	1	0.999707	0.92017	1.01561	0.913762	1.17322	1.28311	1.44068		-3.63564	0.287042	-5.85994	-5.66298	0.932701	0.999999	0.999977
1350	20674	W35076	SRY-box containing gene 2	Sox2	1	1.05937	1.00793	0.697807	1.06862	0.926459	1.09538	1.15727		-6.21702	-0.304112	0.873002	-0.211564	-5.7431	-6.99034	-0.78671
1351	20650	W41237	syntrophin, basic 2	Sntb2	1	0.969367	0.741053	0.670025	1.09476	1.04018	1.15373	1.13211		-5.7825	0.902128	-4.35861	-1.60408	-5.41292	-6.59384	-5.36995
1352	18590	W83150	platelet derived growth factor, alpha	Pdgfa	1	0.942592	0.774035	0.669938	1.14414	0.949542	0.892096	1.2793		-1.4542	0.999959	0.999625	-1.96008	-3.58754	-6.99401	-0.816784
1353	18590	W83150	platelet derived growth factor, alpha	Pdgfa	1	1.04895	0.796108	1.0249	1.25387	1.14093	1.28652	1.38321		0.503838	0.996039	-6.72959	0.899518	0.999399	1	1
1354	16847	AA028211	leptin receptor	Lepr	1	0.90497	0.765486	0.93556	0.991556	0.847202	1.04146	1.44721		0.818974	0.964467	0.966431	-6.83904	-3.44365	-1.68098	0.998582
1355	20440	AA059687	beta galactoside alpha 2,6 sialyltransferase 1	St6gal1	1	0.976989	0.916268	0.790166	1.07293	1.00352	0.993308	1.14199		0.6991	-4.73779	0.525218	-2.516	-1.87879	-4.31068	0.0911733
1356	100974	AA062019			1	1.11818	0.965951	0.715683	1.04016	0.919262	1.17807	1.0222		-4.16643	-5.62228	-0.972386	0.241651	-6.78769	-2.42758	-6.37458
1357	19044	AA062136	protoporphyrinogen oxidase	Ppox	1	0.898586	0.95153	0.97867	1.23338	1.02459	1.17653	1.26277		-2.5677	-3.0574	-3.59618	0.422794	-2.41141	0.999563	0.976432
1358	18197	AA060966	neuron specific gene family member 2	Nsg2	1	1.04263	0.811757	0.994294	0.87621	0.952275	1.26085	1.33692		-0.728441	0.516671	-1.31399	-2.19596	-2.86055	0.996353	0.999676
1359	217069	AA063824	similar to estrogen-responsive finger protein	na	1	0.690651	0.824233	0.790668	0.945238	0.737524	1.03963	1.17782		0.999939	0.999372	0.999518	0.903269	0.905667	-3.50525	0.887696
1360	12653	W54256	chromogranin B	Chgb	1	0.978632	0.864512	1.05223	1.0982	1.05194	1.07633	1.2042		-3.50525	0.980109	0.554239	-0.250101	-0.211247	0.805267	0.997789
1361	53311	W59642	myosin binding protein H	Mybph	1	0.811111	0.930962	0.963623	0.886376	0.85653	1.04395	1.15338		0.866721	-0.0994912	0.947931	-3.15644	0.900817	-2.92862	-3.60745
1362		AI385677			1	1.0046	0.928899	0.959353	1.03815	1.02654	1.01073	1.14678		-2.76635	0.791324	-0.0290049	-3.49539	-2.54204	0.248933	0.771391
1363	11836	W85093	raf-related oncogene	Araf	1	0.779504	0.975727	0.97727	1.19726	1.24046	1.27461	1.5646		0.99612	-1.91992	-2.83735	0.999235	1	0.999999	0.999999
1364	21420	W89370	transcription factor AP-2, gamma	Tcfap2c	1	0.935036	0.904863	0.937502	1.08343	1.04286	0.941611	1.22977		-2.43782	0.830735	0.814105	-2.81392	-1.5592	-3.01562	0.996779
1365	26414	W89577	mitogen activated protein kinase 10	Mapk10	1	0.878409	0.793187	0.936302	0.9769	1.07227	1.19127	1.38765		0.476587	0.977086	0.996974	0.800712	-0.65796	0.986312	0.999769
1366		W91539			1	0.920973	0.822503	0.958603	0.948075	1.0303	1.11467	1.15934		-2.8835	0.0545955	-0.413428	-2.95079	-2.64365	-3.58425	-1.53168
1367	22330	AI385712	vinculin	Vcl
1368	22330	AI385712	vinculin	Vcl	1	0.909918	0.932167	0.929137	0.98988	1.04612	0.926552	1.27115		0.580825	-0.230574	0.248933	-3.47437	-0.0994912	-3.42722	-0.330194
1369		W98935			1	1.03892	0.972012	1.10125	1.04982	1.21609	1.24604	1.46284		-2.16861	-3.31335	0.978948	0.998833	0.999993	1	1
1370	12814	W98013	procollagen, type XI, alpha 1	Col11a1	1	0.987688	0.793085	0.874613	0.953485	0.850316	1.15263	1.15489		-0.544034	0.985908	0.895743	0.275956	-2.51621	-2.30452	0.206985
1371	12814	W98013	procollagen, type XI, alpha 1	Col11a1	1	0.944677	0.75384	1.04192	0.92855	0.956499	1.06287	1.13976		-2.08614	0.796065	-1.15457	-1.6144	-2.54204	-2.83735	-2.49023
1372	11861	AA003086	ADP-ribosylation factor-like 4	Arl4	1	1.04676	0.787025	0.772079	0.956649	0.824495	1.33425	1.21609		-1.47681	0.853232	0.9671	-3.37346	0.890438	0.826705	-0.923668
1373	15414	AA008326	homeo box B6	Hoxb6	1	0.910239	0.988859	1.34251	1.1555	0.95885	1.21724	1.16312		-2.33141	-3.09797	-2.90619	-1.39503	-3.50525	0.987457	-0.173192
1374	13198	AA016906	DNA-damage inducible transcript 3	Ddit3	1	0.773047	0.844042	1.04999	1.08748	0.840597	0.921127	0.891518		0.946533	0.992641	0.720464	-2.83735	-0.728441	-1.89212	-2.41141
1375	56291	AI323304	phosphoserine/threonine/tyrosine interaction protein	Styx	1	0.997463	0.852472	1.1496	0.939349	1.03659	1.15638	0.970791		-3.57397	-3.21192	-1.15457	-0.250101	-3.60674	-2.08614	0.102369
1376	21687	AA017847	endothelial-specific receptor tyrosine kinase	Tek	1	0.921743	0.839729	0.915833	1.05849	0.863921	1.12938	1.22219		-2.16861	-3.4851	0.995333	0.50689	-0.634816	-0.800447	0.554239
1377		AA020223			1	0.929038	1.03027	1.0009	1.00732	1.04725	1.19975	1.11558		-3.46322	-3.4851	-0.269827	-3.57934	-3.60768	0.887696	0.884892
1378	20671	AA024366	SRY-box containing gene 17	Sox17	1	0.940785	0.855147	1.18341	0.962717	1.06793	1.18476	1.17015		-1.80867	-2.14118	-3.58869	-2.19596	-3.45164	0.876103	0.660189
1379	13982	AA024073	estrogen receptor 1 (alpha)	Esr1	1	0.899692	0.775889	0.78458	1.11959	0.963659	1.09318	1.2456		0.978343	-0.289752	0.83855	-3.56815	-3.13727	0.732548	0.95443
1380	13836	AA024123	Eph receptor A2	Epha2	1	0.748937	0.980216	0.928582	0.905913	1.08372	1.06506	0.97944		0.96971	-3.40115	-0.499744	-1.5592	-1.91992	-3.54029	-3.38751
1381	12827	AA108548	procollagen, type IV, alpha 2	Col4a2	1	0.902774	1.02835	1.11132	1.29915	1.28553	1.59228	1.52008		-2.81392	0.554239	-0.65796	0.912543	0.961241	0.999999	0.999978
1382	12972	AA109102	crystallin, zeta	Cryz	1	0.977729	1.00828	0.824134	0.957293	0.864242	1.31602	1.44054		0.953194	-2.8835	0.248933	-2.38486	-2.03088	0.994043	0.999985
1383	18016	AA105153	neurofibromatosis 2	Nf2	1	1.04468	1.04864	0.780442	1.18228	0.890949	0.917515	1.14055		-3.37346	-1.10233	0.937398	-0.371422	-3.17527	-2.14118	-3.59618
1384	18016	AA105153	neurofibromatosis 2	Nf2	1	1.08527	0.909172	0.999078	1.12849	1.07012	1.1056	1.32338		-3.22973	-0.47788	-0.0994912	-0.0463253	-1.72527	0.96971	0.99823
1385	21881	AA162373	transketolase	Tkt	1	1.02147	0.851752	0.908387	1.51659	1.36556	1.75247	1.87078		-0.371422	-3.43964	-3.59267	1	1	1	1
1386	14598	AA162908	gamma-glutamyltransferase 1	Ggt1	1	0.976526	0.951588	0.90986	1.07419	1.08336	1.22594	1.26893		-3.49539	-2.14118	0.89312	0.0545955	-3.26427	0.707918	0.873043
1387	21872	AA122889	tight junction protein 1	Tjp1	1	1.05059	0.772366	0.843379	1.24491	1.10916	1.27266	1.52713		0.652864	-0.752277	0.949295	0.262538	0.0217543	0.945101	0.999998
1388	22236	AA137865	UDP-glucuronosyltransferase 1 family, member 1	Ugt1a1	1	1.14376	1.0724	0.699134	1.0889	1.17514	1.36803	1.6675		-1.83649	-1.47681	0.19262	0.999927	0.99993	1	1
1389	14275	AA139715	folate receptor 1 (adult)	Folr1	1	1.06168	0.745527	0.986144	1.0705	0.818401	1.11532	1.03055		-3.26427	0.912543	-3.24718	-1.05061	-0.974018	-1.18086	-2.83735
1390	20280	AA146030	sterol carrier protein 2, liver	Scp2	1	1.05793	0.910616	0.64532	1.03204	1.0696	1.18062	1.22805		-2.19596	-3.21192	0.744183	-3.50525	-3.40115	-3.281	-3.4851
1391	13135	AA139920	defender against cell death 1	Dad1	1	0.839644	1.04426	0.73799	1.22419	1.10477	1.29074	1.0848		0.916872	-0.47788	0.738421	0.964281	0.796065	0.749837	0.694898
1392	18478	AA140114	phenylalanine hydroxylase	Pah	1	0.86824	0.866573	0.637268	0.947392	0.793136	0.722384	0.809568		-2.86055	-0.330194	0.999979	-0.154466	0.999883	1	1
1393	20918	AA138667	suppressor of initiator codon mutations, related sequence 1 (S. cerevisiae)	Sui1-rs1	1	0.960973	0.928381	0.787603	0.831206	0.970565	0.928543	1.13124		-3.07784	-3.60557	-1.8643	0.973638	-0.65796	0.818391	-3.58869
1394		AA111732	cadherin 23 (otocadherin)	Cdh23	1	0.933797	0.855118	0.971251	1.2397	0.840239	1.20536	1.2477		-2.95079	-3.31335	-3.09797	-3.5322	0.364733	-3.47437	-0.0815683
1395	22099	AA118918	translin	Tsn	1	0.926393	0.886803	0.89771	0.992882	1.06702	1.12346	1.43981		-1.58677	0.999501	-2.59319	-1.8643	0.652864	0.999879	0.999968
1396	26413	AA119251	mitogen activated protein kinase 1	Mapk1	1		0.749141		1.59781			1.16576
1397	14084	AA124805	Fas-associated factor 1	Faf1	1	1.09167	0.858783	0.889675	1.02347	0.891889	1.14653	1.16626		0.50689	0.895743	0.93405	-1.89212	0.879097	0.987086	0.00503458
1398	19697	AA125356	v-rel reticuloendotheliosis viral oncogene homolog A (avian)	Rela	1	0.975189	0.673688	1.02434	1.40214	1.02058	0.984582	0.92548		-3.49539	0.99926	-2.51621	-3.50525	-0.499744	-3.01562	-0.250101
1399	14745	AA124573	endothelial differentiation, lysophosphatidic acid G-protein-coupled receptor, 2	Edg2	1	0.949744	0.930115	0.952339	0.793748	0.953743	0.679921	0.966094		-2.86055	-2.08614	-1.66977	0.979536	0.340275	0.998715	0.998172
1400	14745	AA124573	endothelial differentiation, lysophosphatidic acid G-protein-coupled receptor, 2	Edg2	1	0.851525	0.750159	0.942472	1.05423	1.21619	1.21577	1.26032		-2.27752	0.49695	-0.434721	0.486849	-0.999409	0.572111	0.580825
1401	17876	AA123925	myelin basic protein expression factor 2, repressor	Myef2	1	1.03625	0.903022	0.773168	1.17796	1.00412	1.07543	1.32883		-0.269827	0.842337	-0.392328	-3.03666	0.834683	0.998538	0.999988
1402	21848	AI323646	tripartite motif protein 24	Trim24	1	0.776781	0.754043	0.753059	1.26008	1.03172	0.927582	0.927846		0.943633	0.996464	0.999501	-3.281	-2.83735	-1.80867	-1.44948
1403	15980	AA123774	interferon gamma receptor 2	Ifngr2	1	1.03852	0.870769	0.951231	1.25644	0.982908	1.36288	1.05506		-3.60745	-3.0574	-3.42722	-2.69334	-2.92862	-1.20727	-0.117615
1404	24086	AA137282	tousled-like kinase 2 (Arabidopsis)	Tlk2	1	0.89739	0.787457	0.657967	1.00312	0.879057	1.13008	1.07549		0.786487	0.744183	0.946533	-1.42222	-1.9477	-1.89212	-3.5322
1405		AA124082			1	0.912948	1.04703	0.918376	1.10264	1.00761	1.2792	1.23712		0.248933	-1.02494	-3.47437	-3.52366	-1.8643	0.856713	-2.30452
1406	16414	AA153752	integrin beta 2	Itgb2	1	0.9053	0.857598	0.953337	1.02046	0.891069	1.25142	1.19169		-0.413428	-1.42222	0.755383	-3.57934	-1.15457	0.800712	0.340275
1407	18567	AA143992	programmed cell death 2	Pdcd2	1	0.804418	0.964146	0.737837	1.04947	0.854384	0.98978	1.35741		0.912543	0.688206	0.99907	-3.29736	-1.6144	-1.5592	0.102369
1408		AA152814			1	0.927251	0.939579	0.759398	1.11106	1.01359	1.17101	1.2734		-0.681281	-2.79025	0.580825	-0.0815683	-0.94877	-0.65796	-2.64365
1409	30945	AA145819	ring finger protein (C3HC4 type) 19	Rnf19	1	0.905864	0.812722	0.714208	1.04382	1.05719	1.2661	1.39864		-2.66859	0.999776	0.999981	-2.3582	-2.97268	0.999431	0.998391
1410	18938	AA137633	protein phosphatase 1, regulatory (inhibitor) subunit 14B	Ppp1r14b	1	0.842015	1.02356	0.854283	1.05864	1.18949	1.24306	1.44496		-1.15457	-1.6975	0.580825	-0.611849	0.444813	0.98121	0.997492
1411	17686	AA122755	mutS homolog 3 (E. coli)	Msh3	1	0.867622	0.696201	0.808446	1.02946	0.998853	1.25536	1.3686		0.486849	0.991454	0.991949	-3.57934	-1.6975	0.327777	0.988512
1412	22214	AA122513	ubiquitin-conjugating enzyme E2H	Ube2h	1	0.924785	0.891116	0.721186	1.08231	1.17795	1.40983	1.57053		-2.3582	-0.371422	0.995333	0.0382745	0.760823	0.999841	1
1413	11767	AA138127	adaptor-related protein complex AP-1, mu subunit 1	Ap1m1	1	0.839768	0.879857	0.888703	1.16186	1.19908	1.20619	1.21017		0.975071	-0.13594	0.993859	0.887696	0.961241	0.988845	0.989168
1414	17151	AA146487	cyclin D-type binding-protein 1	Ccndbp1	1	0.791537	0.87152	0.925167	1.3762	1.20315	0.961343	0.81617		0.23514	0.352594	0.975071	-3.49539	0.771391	-3.56815	-3.60674
1415	27225	AA145121	DEAD (Asp-Glu-Ala-Asp) box polypeptide 24	Ddx24	1	0.870046	0.865585	0.874344	1.13218	1.11256	1.19178	1.12302		0.992641	0.963293	0.957963	0.444813	0.849676	0.937398	0.978343
1416	18000	AA144387	septin 2	38232	1	0.874658	0.682731	0.784906	1.34033	1.14752	1.20302	1.43832		-3.54029	0.221158	0.645407	-2.66859	-1.10233	-0.371422	0.846045
1417	12826	AA162273	procollagen, type IV, alpha 1	Col4a1	1	1.03078	0.948952	0.924844	1.00754	1.03246	1.50951	1.37248		0.45557	0.535764	-2.25042	-3.31335	0.957963	0.999829	0.996677
1418	11820	AA170656	amyloid beta (A4) precursor protein	App	1	0.892604	0.876741	0.900094	0.975546	0.972431	1.28943	1.46525		-0.999409	-3.0574	-1.72527	-0.728441	-2.43782	0.995998	0.967992
1419		AA170277			1	0.985223	0.722378	1.09316	0.921972	1.03014	1.1194	1.2298		-1.5592	0.991195	-3.60181	-3.54029	-1.10233	0.876103	0.86012
1420	12478	AA170492	CD19 antigen	Cd19	1	0.842606	0.874667	0.897198	1.09429	0.935142	1.29468	1.31538		-3.26427	0.830735	-1.72527	-3.4851	-1.78085	0.102369	0.988512
1421	15081	AA170686	H3 histone, family 3B	H3f3b	1	1.14728	1.01196	0.851738	0.985419	1.12324	1.40882	1.64796		0.606095	0.652864	-2.3582	0.388481	0.989482	0.999991	1
1422	12350	AA170585	carbonic anhydrase 3	Car3	1	1.14124	0.937702	0.663691	0.859734	0.461985	0.48523	0.642827		0.791324	-2.4641	0.667384	-2.59319	1	1	1
1423	17863	AA170760	myeloblastosis oncogene	Myb	1	0.847268	0.985232	1.07618	0.88107	0.92815	0.856948	1.04161		-0.728441	-1.91992	-1.75305	0.589392	-1.34091	-0.289752	-0.681281
1424	20846	AA170538	signal transducer and activator of transcription 1	Stat1	1	0.957806	0.857806	0.834656	1.02682	1.05428	1.22986	1.15645		-0.35071	0.388481	0.340275	-1.83649	-3.60557	0.985908	-1.10233
1425	20846	AA170538	signal transducer and activator of transcription 1	Stat1	1	0.986489	0.912664	0.833561	0.960682	1.00839	1.16312	1.18804		-0.13594	0.873043	0.400092	0.275956	-2.83735	0.988845	0.572111
1426	22258	AA163181	ubiquitin specific protease 4 (proto-oncogene)	Usp4	1	0.933524	0.966879	0.789789	1.15937	0.979577	1.13494	1.29557		-1.53168	-3.59267	0.996878	0.94213	-3.37346	0.983243	0.842337
1427	53872	AA163184	GPI-anchored membrane protein 1	Gpiap1	1	1.17419	0.72647	0.720711	1.06965	0.975398	1.1945	1.41827		-2.03088	0.971342	0.476587	-2.41141	-3.24718	0.957963	0.983243
1428	19645	AA154684	retinoblastoma 1	Rb1	1	0.908119	0.790277	0.950024	0.964247	1.02858	1.11118	1.18055		-3.60392	0.94213	0.996677	-2.61851	-2.61851	0.070718	0.400092
1429	12977	AA163532	colony stimulating factor 1 (macrophage)	Csf1	1	0.882938	0.873834	1.06339	1.13046	1.11854	1.23065	1.44997		-0.0815683	-0.0815683	-2.86055	-0.923668	0.0866423	0.968862	0.999998
1430	22632	AA163488	YY1 transcription factor	Yy1	1	0.772713	0.964113	0.90689	1.15009	1.08261	1.3423	1.33118		0.999989	-0.269827	-1.75305	0.791324	0.937398	0.999991	1
1431	14056	AA154768	enhancer of zeste homolog 2 (Drosophila)	Ezh2	1	0.955293	0.815726	0.906346	1.01508	0.983315	1.2168	1.28793		0.133233	0.993277	0.981739	-3.45164	0.572111	0.995873	0.995998
1432		AA163512			1			1.01885	1.87545	0.960268	1.48312	1.0061
1433	12484	AA154829	CD24a antigen	Cd24a	1	0.882407	0.7713	0.999213	1.0073	0.916189	1.26708	1.27254		0.912543	0.998975	-0.371422	-2.27752	-2.38486	0.997492	0.995038
1434	17254	AA162505	solute carrier family 3 (activators of dibasic and neutral amino acid transport), member 2	Slc3a2	1	0.917286	0.982259	0.911312	1.2341	1.20774	1.29567	1.39158		0.86012	-1.8643	-0.824777	0.998715	0.966184	1	1
1435	12445	AA162516	cyclin D3	Ccnd3	1	0.705242	0.747838	0.926622	1.12544	1.36073	1.42717	1.57329		1	0.999776	0.887696	0.701468	0.999998	1	1
1436	14151	AA166544	ferrochelatase	Fech	1	0.899261	0.965673	0.766262	1.07376	1.07037	1.11921	1.18473		-1.15457	0.726563	0.935744	0.352594	-3.17527	0.637818	0.206985
1437	21817	AA165755	transglutaminase 2, C polypeptide	Tgm2	1	0.987055	0.896469	0.850038	1.22454	1.17612	1.19679	1.31122		-2.51621	-0.499744	-2.30452	0.589392	0.976432	0.999976	0.998795
1438	16425	AA166367	inter-alpha trypsin inhibitor, heavy chain 2	Itih2	1	0.969704	1.10454	0.816698	1.16676	1.29352	1.24667	1.27547		-3.47437	-1.28716	0.86012	0.908012	0.997925	0.978948	0.999726
1439	12575	AA072841	cyclin-dependent kinase inhibitor 1A (P21)	Cdkn1a	1	0.797708	1.28055		1.42643	0.677632	0.963559	1.02784		0.545078	-2.90619	-3.11778	0.0382745	-2.5677	-3.58869	-2.59319
1440	19360	AA072760	RAD50 homolog (S. cerevisiae)	Rad50	1	0.760426	0.891241	0.957003	1.20395	0.869881	1.1406	1.12194		0.163314	-0.589062	-2.83735	0.364733	-1.75305	-1.58677	-3.09797
1441	19057	AA062279	protein phosphatase 3, catalytic subunit, gamma isoform	Ppp3cc	1	0.840211	0.88894	0.878548	0.90791	0.998072	1.12581	1.16875		0.791324	0.148371	0.993476	0.760823	-3.60745	0.94213	0.50689
1442	56449	AA139010	cold shock domain protein A	Csda	1	0.946317	0.763246	0.975582	1.08929	0.911872	0.9912	1.23957		-3.19377	-0.873914	0.516671	-0.752277	-3.56815	0.315097	-0.0994912
1443	20480	AA145018	suppressor of K+ transport defect 3	Skd3	1	1.01334	0.906861	1.07242	0.999651	0.88262	0.912086	1.1891		0.766158	0.968862	-2.76635	-1.75305	-3.34418	0.999008	0.873043
1444	21958	AA144629	transition protein 1	Tnp1	1	0.884439	0.935904	0.927964	1.17096	1.10377	1.15811	1.32511		0.97576	-0.65796	0.49695	0.998833	0.895743	0.0866423	0.994562
1445	21463	AA144703	t-complex protein 11	Tcp11	1	1.04043	0.908994	0.828398	1.27472	0.955174	1.02137	1.01556		-2.54204	0.637818	0.0545955	-2.51621	-1.5592	0.0545955	-2.11369
1446	18285	AA144819	outer dense fiber of sperm tails 1	Odf1	1	0.842845	0.894906	0.871802	1.06658	0.806714	1.11292	1.0419		0.932315	-2.16861	0.949295	-0.154466	-0.681281	-3.32896	-1.75305
1447		AA144743			1	1.00045	1.07239	0.941572	0.988228	1.06719	1.13718	1.11845		-3.22973	-0.566456	-0.47788	-3.43964	-3.42722	0.976432	0.411529
1448	19107	AA153570	DnaJ (Hsp40) homolog, subfamily C, member 3	Dnajc3	1	0.988019	0.83326	0.876726	1.05574	0.832809	1.07028	0.928708		-2.95079	0.766158	0.133233	-3.38751	0.545078	-2.97268	0.707918
1449	12189	AA167963	breast cancer 1	Brca1	1	0.961895	0.971897	1.03863	1.22199	1.00176	1.23321	1.19116		-3.54029	-3.54029	-3.45164	-0.611849	-3.56815	0.989482	0.818391
1450		AA155514			1	0.956467	0.939237	0.948559	1.1834	1.12654	1.17116	1.32771		-1.28716	-0.47788	0.00503458	0.606095	0.98418	0.997858	0.999999
1451	14225	AA161957	FK506 binding protein 1a	Fkbp1a	1	0.932617	0.973414	0.851615	1.05498	0.800791	0.862034	0.964773		-2.99429	-3.60392	0.994043	-3.15644	-1.12839	0.755383	-0.589062
1452	13138	AA153173	dystroglycan 1	Dag1	1	0.900898	1.01731	0.906853	1.14233	1.09808	1.09104	1.26345		-0.999409	-2.03088	-0.19212	-1.02494	-1.64206	-2.38486	0.998285
1453	14455	AA154585	growth arrest specific 5	Gas5	1	0.99357	0.931711	1.00354	1.18031	1.14007	1.24551	1.48041		-0.173192	0.963293	0.771391	0.982254	0.999874	0.999999	1
1454	13590	AA163209	left-right determination, factor B	Leftb	1	1.02152	1.05707	1.16682	1.06815	1.13	0.961572	1.01296		-2.51621	0.289187	0.822591	0.606095	0.422794	-1.18086	0.315097
1455	14674	AA073262	guanine nucleotide binding protein, alpha 13	Gna13	1	0.878817	0.703421	0.822232	1.26915	1.01204	1.02301	1.32402		0.814105	0.998391	-1.15457	0.884892	-3.58425	-0.800447	0.908012
1456	19659	AA087526	retinol binding protein 1, cellular	Rbp1	1	0.827571	1.02323	0.851009	1.21824	1.06745	0.942129	1.04171		0.755383	0.589392	0.652864	-2.4641	-2.38486	-0.923668	-0.634816
1457	19090	AA120498	protein kinase, DNA activated, catalytic polypeptide	Prkdc	1	0.989514	1.05896	0.822212	1.12758	1.00364	1.26997	1.2052		-3.11778	-3.60768	0.999485	0.932315	-3.40115	0.992417	0.786487
1458	20341	AI322955	selenium binding protein 1	Selenbp1	1	0.745082	0.731076	0.49262	0.879103	1.03392	1.00281	1.3495		0.999591	0.999967	0.999994	0.822591	0.900817	-1.64206	0.117899
1459	269261	W11918	ribosomal protein L12	Rpl12	1	0.902525	0.971293	0.886281	1.56454	1.15731	1.43086	1.97198		0.726563	-2.08614	-3.56815	1	1	1	1
1460		AI323903			1	0.967706	0.750538	0.978258	1.06154	1.07217	0.877245	1.18618		-0.589062	-0.330194	0.997245	-1.23379	-3.21192	-1.78085	0.995474
1461	70861	AI323924	RIKEN cDNA 4921521F21 gene	4921521F21Rik	1	1.02003	0.813778	0.89462	1.34898	1.31604	1.21984	1.35245		-2.95079	0.148371	-2.54204	0.910303	0.96228	0.951926	0.999937
1462	70861	AI323924	RIKEN cDNA 4921521F21 gene	4921521F21Rik	1	0.906903	0.903841	1.08852	1.23912	1.24718	1.20107	1.74628		-2.76635	-0.250101	-3.09797	0.822591	0.999533	0.99733	1
1463	16476	AI323925	Jun oncogene	Jun	1	0.852933	1.08299	0.679591	1.01493	1.13309	0.766584	0.957341		-3.60181	-3.43964	0.863456	-2.51621	-0.289752	-0.728441	-1.5592
1464	18778	W12659	phospholipase A2, group IB, pancreas	Pla2g1b	1	0.886164	1.00629	1.03077	0.926847	1.04255	0.967473	1.15921		-0.0815683	-2.81392	-3.40115	-1.50421	-1.44948	-1.28716	0.932315
1465	15122	AI327460	hemoglobin alpha, adult chain 1	Hba-a1	1	0.843366	1.0033	0.977477	1.10923	1.06245	1.10576	1.56033		-0.566456	-3.58869	-3.17527	-3.47437	-2.61851	-1.34091	0.822591
1466	76263	AI323948	glutathione S-transferase kappa 1	Gstk1	1	1.15618	0.907646	0.740872	1.18049	0.774675	0.796775	1.13972		-2.38486	0.388481	0.999518	-2.14118	0.376695	-0.35071	0.554239
1467	381307	AI323965	LOC381307	na	1	1.16413	0.93663	0.65775	1.24543	0.797337	0.922918	1.0488		-0.999409	-0.94877	0.999676	-1.0764	0.535764	-0.544034	-3.45164
1468	19043	AI324040	protein phosphatase 1B, magnesium dependent, beta isoform	Ppm1b	1	0.774313	0.878958	0.880678	1.09234	0.960987	0.940761	1.04274		0.876103	0.805267	0.749837	-0.230574	-1.6144	-3.52366	0.545078
1469	12466	W15895	chaperonin subunit 6a (zeta)	Cct6a	1	1.03912	0.954718	0.861919	1.05939	1.13884	1.37193	1.17903		-2.71789	-3.60674	0.444813	-0.923668	-0.371422	0.999997	0.688206
1470	19240	AI322354	thymosin, beta 10	Tmsb10	1	1.07281	0.954343	1.18727	1.2811	0.962363	1.08378	1.06183		-3.0574	-3.46322	-1.0764	0.994043	-3.47437	0.89312	0.49695
1471	170718	AA036340	isocitrate dehydrogenase 3 (NAD+) beta	Idh3b	1	1.03944	0.919239	0.862334	0.99421	0.864657	1.05133	1.16998		-3.60181	-2.92862	0.352594	-1.39503	-0.824777	0.163314	-1.75305
1472	12868	AI326932	cytochrome c oxidase, subunit VIIIa	Cox8a	1	0.884781	1.03341	0.968074	1.19401	0.933118	1.16703	1.11592		-0.499744	-3.47437	-3.60674	-0.544034	-3.56186	-0.634816	-0.289752
1473	18970	AA059718	polymerase (DNA directed), beta	Polb	1	1.14029	0.96162	0.892523	1.05417	0.950388	0.985988	1.13639		-2.49023	-0.211247	-0.974018	-2.38486	-3.37346	0.545078	0.275956
1474	12925	AA062022	cysteine-rich protein 1 (intestinal)	Crip1	1	1.03169	0.917802	0.777757	1.00803	1.14096	1.04375	1.01475		-2.3582	-2.5677	0.951926	-2.64365	-3.57934	-3.46322	-2.59319
1475	12313	AI327027	calmodulin 1	Calm1	1	1.12512	1.13073	0.978459	1.32201	1.24462	1.13326	1.33801		-3.19377	-1.64206	-0.752277	0.978343	0.996878	-1.42222	0.992641
1476	16949	AA098349	lysyl oxidase-like 1	Loxl1	1	1.06328	1.14046	0.938011	1.18779	1.02376	0.950813	1.19206		-2.83735	-3.45164	-1.02494	0.981739	0.340275	0.776522	0.999908
1477	22414	W44010	wingless related MMTV integration site 2b	Wnt2b	1	1.06173	0.812046	1.00705	1.00406	0.982195	1.05271	1.15082		0.19262	-3.19377	-0.269827	-1.34091	-3.57934	-1.89212	-0.173192
1478	22153	W84068	tubulin, beta 4	Tubb4	1	0.925456	0.950318	1.13002	1.15318	1.02565	1.14964	1.00394		-0.611849	-2.64365	-2.11369	-3.57397	-3.0574	0.340275	-1.83649
1479	19073	AI325844	proteoglycan, secretory granule	Prg	1	0.768893	0.856091	1.02993	1.23032	1.10342	1.33754	1.39006		0.994562	-0.230574	-0.728441	0.957963	-2.66859	0.999991	0.999184
1480	15528	AI325874	heat shock protein 1 (chaperonin 10)	Hspe1	1	0.860153	0.921496	0.929639	1.36805	1.15965	1.15481	1.44424		-0.681281	0.99093	-1.50421	0.998941	0.99963	0.978343	0.999983
1481		AI325893			1	0.955016	0.926554	0.998993	1.43772	0.900028	1.1487	0.831188		-1.31399	-0.800447	-1.75305	0.999922	-3.42722	-0.011885	0.946533
1482	107995	AA000468	cell division cycle 20 homolog (S. cerevisiae)	Cdc20	1	0.980792	0.836927	1.06627	0.920128	1.05051	1.17276	1.21517		-3.45164	0.0866423	-1.10233	-2.16861	-1.9477	-0.173192	0.545078
1483	12591	AI327188	caudal type homeo box 2	Cdx2	1	0.919378	0.956044	0.97093	1.46059	1.11538	1.17213	1.10958		-3.45164	-0.544034	-3.26427	0.987819	-0.521796	0.947931	0.910303
1484	20467	AA051137	transcriptional regulator, SIN3B (yeast)	Sin3b	1	0.982387	1.14322	1.15877	0.813428	0.948594	1.06401	1.10345		0.771391	-3.5322	0.411529	-1.26042	-3.56815	0.982755	0.999987
1485	21923	AA003942	tenascin C	Tnc	1	1.05316	0.852779	0.991351	1.2793	1.2628	1.28265	1.42027		-1.6975	0.364733	-3.21192	0.951926	0.970537	0.999995	0.999993
1486	19185	AA004048	proteasome (prosome, macropain) 26S subunit, non-ATPase, 4	Psmd4	1	0.943863	1.06259	0.890512	1.03472	1.10089	1.18953	1.22976		-3.60392	-2.59319	-0.309874	-0.999409	-1.75305	0.998172	0.992641
1487		AA008793			1	0.924482	0.986407	0.843353	1.10093	0.985611	0.878703	1.25065		-3.01562	-0.521796	0.999591	-1.64206	-1.02494	0.516671	-0.499744
1488	17164	AI324228	MAP kinase-activated protein kinase 2	Mapkapk2	1	0.97448	0.934238	0.966472	1.03227	1.20419	1.31669	1.23353		-2.95079	-2.08614	-0.0815683	-0.154466	0.846045	0.999618	0.999998
1489	13476	AA032729	deleted in polyposis 1	Dp1	1	0.929576	1.00952	0.901953	1.14002	1.10611	1.14852	1.36608		-0.94877	-3.47437	0.660189	-1.97546	0.994562	0.999351	0.999972
1490	56150	AA033406	MAD2 (mitotic arrest deficient, homolog)-like 1 (yeast)	Mad2l1	1							1.09667
1491	19646	AA031007	retinoblastoma binding protein 4	Rbbp4	1	0.850227	0.848651	0.888526	0.906623	1.08752	1.22945	1.3256		0.910303	-1.05061	0.0866423	-0.873914	-0.873914	0.999372	0.987457
1492	15901	AI322584	inhibitor of DNA binding 1	Idb1	1	0.617684	1.18789	0.792641	1.04568	0.879807	1.2319	1.32146		0.994043	-1.20727	-0.752277	-1.80867	-1.02494	0.884892	0.688206
1493	13386	AI322593	delta-like 1 homolog (Drosophila)	Dlk1	1	0.88936	0.903165	1.56628	0.808713	0.833411		0.967388		-3.21192	-3.51468	0.163314	0.340275	-1.91992	-0.392328	-3.49539
1494	20320	AI322596	stromal cell derived factor receptor 1	Sdfr1	1	0.874387	0.726506	0.913345	1.56259	1.05353	1.05254	1.12859		-1.66977	0.999841	0.879097	0.986704	-0.521796	0.995998	-2.11369
1495	12406	AI326777	serine (or cysteine) proteinase inhibitor, clade H, member 1	Serpinh1	1	1.06963	0.904631	1.10189	1.16756	1.11805	1.32306	1.0828		-3.32896	-0.434721	-1.42222	0.937398	-1.23379	0.999977	0.545078
1496	15402	AI322633	homeo box A5	Hoxa5	1	0.801211	0.944676	1.11573	1.71588	1.08838	1.42803	1.15855		0.884892	-1.23379	-0.800447	0.999962	0.932315	1	0.999969
1497	66849	AA041826	protein phosphatase 1, regulatory (inhibitor) subunit 2	Ppp1r2	1	1.14604	1.02353	0.632928	1.37769	1.08975	0.990611	0.869123		-0.19212	0.744183	0.275956	-1.53168	-2.43782	0.00503458	-2.74222
1498	53414	AA044532	bystin-like	Bysl	1	0.864916	0.910617	1.06697	1.06624	1.21853	1.00484	1.28845		-0.521796	-0.413428	-3.60557	-0.13594	0.0545955	-3.40115	0.910303
1499	19744	AI322688	RAS-homolog enriched in brain	Rheb	1	1.01234	0.881739	0.772038	1.22655	1.01658	1.09025	1.21959		-0.566456	-2.19596	0.999955	-3.37346	0.411529	-2.69334	0.994394
1500	15354	AA050039	high mobility group box 3	Hmgb3	1	0.981361	1.22822	0.924601	1.26109	1.03595	0.940248	1.0542		-0.371422	-3.52366	-3.43964	0.932315	0.939013	-2.81392	0.903269
1501	21930	AA051341	tumor necrosis factor alpha induced protein 6	Tnfaip6	1	0.900505	0.815302	0.849822	1.03131	1.08186	1.07293	1.38742		-1.64206	0.866721	0.999966	-2.61851	-1.66977	0.9671	0.720464
1502	16653	AI322494	Kirsten rat sarcoma oncogene 2, expressed	Kras2	1		1.33807	1.40405	0.962961	0.993969	1.31536	1.22247		-1.36793	0.951926	-2.11369	-0.873914	-1.83649	0.926859	-3.60392
1503	14155	AA030303	feminization 1 homolog b (C. elegans)	Fem1b	1		1.23909				1.40074	1.2204
1504	76366	AA105238	RIKEN cDNA 2810012L14 gene	2810012L14Rik	1	1.02079	0.858096	1.20318	1.08897	1.05037	1.247	1.17124		-1.5592	-1.6975	-3.60745	-0.589062	-2.27752	0.999887	0.992417
1505	12509	AA162378	CD59a antigen	Cd59a	1	0.811687	0.911531	0.728929	1.48411	1.28779	1.57945	1.53177		0.00503458	0.572111	0.976432	0.999984	0.98817	1	1
1506	56551	AA116866	thioredoxin 2	Txn2	1	0.782346	0.899488	0.797978	1.10269	1.24958	1.26011	1.33019		0.999735	0.221158	0.999887	0.873043	0.990656	0.998285	0.999954
1507	14874	AA139820	glutathione transferase zeta 1 (maleylacetoacetate isomerase)	Gstz1	1	0.962478	1.04991	0.720028	1.21451	0.899786	1.06305	1.10575		-1.50421	-2.03088	0.950627	-1.20727	-3.19377	-3.5322	-3.60674
1508	21374	AI327297	TATA box binding protein	Tbp	1	0.840737	1.01825	0.900753	1.04792	1.03271	1.20529	1.25962		0.781554	-3.03666	0.968862	-0.392328	-1.9477	0.589392	0.997858
1509	20585	AA123821	SWI/SNF related, matrix associated, actin dependent regulator of chromatin, subfamily a, member 3	Smarca3	1	0.902197	0.899658	1.02399	1.02802	0.949848	1.11996	1.13165		-1.6975	-2.05853	0.869916	-0.681281	-3.58425	0.805267	-2.08614
1510	20585	AA123821	SWI/SNF related, matrix associated, actin dependent regulator of chromatin, subfamily a, member 3	Smarca3	1	1.06858	0.884276	1.11405	0.862372	0.977559	1.08711	1.14287		-0.681281	-3.58425	-2.05853	-2.4641	-2.83735	-2.41141	-0.704775
1511	13982	AI327373	estrogen receptor 1 (alpha)	Esr1	1	0.898099	1.07727	1.03819	1.07179	1.05494	0.974051	1.23181		-3.37346	-3.07784	0.248933	-0.776279	0.388481	-2.05853	0.966184
1512	68831	AA153879			1	0.855153	0.750975	0.753871	0.888879	1.20858	1.24293	1.42491		-2.30452	0.985494	0.924953	0.45557	-1.6144	0.364733	0.946533
1513	21753	AI325946	testis derived transcript	Tes	1	1.0058	0.975878	0.782514	0.944602	0.813783	1.0325	0.669335		-3.4851	-3.38751	0.50689	-1.72527	-1.47681	-3.09797	-0.434721
1514	68240	AA142596	replication protein A3	Rpa3	1	0.826729	0.87006	0.844465	1.06291	1.07065	0.969301	1.16985		0.822591	-1.6144	0.992859	-3.58425	-0.873914	0.526295	-0.611849
1515		AA138570			1	0.982663	0.836438	1.08389	1.11635	0.953794	1.08923	1.14917		-2.74222	-0.824777	-3.26427	-0.999409	-3.57934	0.996353	0.879097
1516	11933	AA139067	ATPase, Na+/K+ transporting, beta 3 polypeptide	Atp1b3	1	0.889342	0.771746	1.01381	1.21338	1.09411	1.04212	1.08168		0.916872	0.965245	-1.28716	0.597815	-2.14118	0.376695	0.554239
1517	103692	AA161814			1	0.824223	0.780452	0.920982	1.07809	1.10161	1.14995	1.22843		-0.13594	0.667384	0.766158	-2.5677	0.974364	0.947931	-0.752277
1518	19182	AA163174	proteasome (prosome, macropain) 26S subunit, ATPase 3	Psmc3	1	0.828047	0.787342	0.915329	1.47563	0.948349	0.998801	1.13733		0.939013	0.980667	0.879097	0.996878	-0.47788	0.726563	-0.752277
1519	13346	AA087855	desmin	Des	1	1.38375	0.979552	1.11325	0.822969	0.861206	1.41412	0.973604		-3.60392	-2.43782	-2.38486	-2.74222	-3.31335	-1.5592	-2.54204
1520	21400	AI326127	transcription elongation factor A (SII), 2	Tcea2	1	1.1166	0.489333	1.34798	1.12544	0.896806	0.710246	0.784183		-3.01562	0.133233	-2.64365	-3.19377	-3.07784	-1.8643	-3.52366
1521	15212	AI326130	hexosaminidase B	Hexb	1	0.996179	1.12274	0.894436	1.18306	1.00398	1.14912	1.07386		-2.83735	-0.634816	0.988512	0.23514	-3.49539	0.999998	0.00503458
1522	22154	AA170370	tubulin, beta 5	Tubb5	1	1.03926	1.17144	0.953209	1.50457	1.27087	1.38652	1.36703		-3.24718	-3.03666	-3.45164	1	0.999955	1	0.999988
1523	71679	AA154397	ATP synthase, H+ transporting, mitochondrial F0 complex, subunit d	Atp5h	1	1.014	0.978098	0.834454	0.965989	0.893838	1.04701	1.24634		-3.59923	-1.78085	0.289187	-2.97268	-3.17527	-3.24718	0.972892
1524	66108	AA167918	NADH dehydrogenase (ubiquinone) 1 alpha subcomplex, 9	Ndufa9	1	1.07203	1.00912	0.789119	1.32578	0.980909	0.942669	1.36955		-3.31335	-3.13727	-0.544034	0.49695	0.262538	0.842337	0.994394
1525	235431	AA124231	RIKEN cDNA E130012P22 gene	E130012P22Rik	1	0.92742	0.89169	0.791676	1.15987	1.02331	1.24107	1.20556		-2.19596	0.89312	0.981739	-0.250101	-2.79025	0.996353	0.98463
1526	22145	W11746	tubulin, alpha 4	Tuba4	1	1.01801	0.961522	0.778874	1.248	1.21035	1.46588	1.51252		-3.38751	0.572111	-0.289752	0.968862	0.992641	0.999717	1
1527	17880	W33517	myosin heavy chain 11, smooth muscle	Myh11	1	0.840537	0.960255	0.66075	1.25908	0.79171	0.876277	1.07212		0.726563	-2.41141	0.99757	-0.65796	0.982755	0.364733	-3.21192
1528	208715	AA061468	3-hydroxy-3-methylglutaryl-Coenzyme A synthase 1	Hmgcs1	1	0.777075	0.931181	0.848191	1.33174	1.06545	1.10053	1.1509		-0.011885	-0.371422	-2.90619	0.939013	-2.8835	-1.78085	-2.30452
1529	21423	W41716	transcription factor E2a	Tcfe2a	1	0.869531	0.94755	0.788771	1.19483	1.02618	1.21034	1.28961		-0.371422	-3.15644	-1.15457	-0.309874	-2.90619	-0.521796	0.809731
1530	15461	AI385418	Harvey rat sarcoma virus oncogene 1	Hras1	1	0.872541	0.955339	1.00184	1.20971	1.02569	0.931689	0.95156		0.993071	0.995333	0.999726	0.95443	-3.17527	-1.89212	-3.60392
1531		AI385420	expressed sequence AI327276	AI327276	1	0.894476	1.04395	0.992353	1.41731	1.22432	1.46295	1.45491		-0.330194	-2.71789	-3.47437	0.999977	0.999887	1	0.999992
1532	20848	AI385862	signal transducer and activator of transcription 3	Stat3	1	0.85151	0.949909	0.746717	0.854401	0.823923	0.874482	0.915557		0.932315	0.966184	0.999851	0.637818	0.939013	0.94059	-0.13594
1533	11657	W70567	albumin 1	Alb1	1	1.71542	1.26938	0.875283	1.13071	0.883342	1.14516	1.34436		0.999967	0.786487	-3.07784	-0.117615	-0.47788	-1.78085	-0.413428
1534	18538	AI385898	proliferating cell nuclear antigen	Pcna	1	1.00022	1.04256	0.87007	1.09069	0.991392	1.09873	1.20555		-3.13727	0.720464	0.999947	-1.6144	0.667384	0.999829	0.993476
1535	109182	W83493			1	1.06173	1.02338	0.909823	0.971035	0.847626	0.968963	1.19354		-2.92862	-3.13727	0.526295	-2.51621	-1.83649	-2.97268	-0.873914
1536		W97166			1	0.958269	0.968642	0.872363	0.964226	0.993468	1.07305	1.23725		-2.69334	0.102369	0.999518	0.45557	-1.23379	0.97576	0.967992
1537	20014	AA000779	ribophorin II	Rpn2	1							1.18779
1538		AA003413			1	0.892601	0.759353	0.84015	1.31808	0.806872	1.18379	1.26192		-0.154466	-0.0290049	0.23514	-3.58869	-3.22973	0.535764	0.987819
1539	12314	AA044542	calmodulin 2	Calm2	1	0.89411	0.848735	0.893731	1.25783	1.18236	1.15899	1.75679		-3.60557	0.660189	-3.21192	-0.589062	0.996779	1	1
1540	12476	AA050218	CD151 antigen	Cd151	1	0.866338	0.864882	0.731149	1.15878	1.03219	1.20882	1.12136		0.842337	0.977086	0.963293	0.178064	-3.17527	0.923003	-3.5322
1541	14630	AA051435	glutamate-cysteine ligase , modifier subunit	Gclm	1	0.905007	0.931794	0.952611	1.00268	0.967481	0.932707	1.05975		-3.43964	0.148371	0.996878	0.846045	-2.5677	-2.95079	-0.434721
1542	16419	AA124047	integrin beta 5	Itgb5	1	0.897055	0.864986	0.878095	1.26028	0.886586	1.04319	0.987167		-3.52366	0.957963	0.998491	0.476587	-3.0574	-3.60557	0.937398
1543	53376	AA139612	ubiquitin specific protease 2	Usp2	1	0.331557	0.635953	0.787673	0.592943	1.53487	0.750257	1.02132		0.999993	0.796065	-0.681281	0.966184	0.895743	-0.154466	-3.57934
1544	56451	AA142482	succinate-CoA ligase, GDP-forming, alpha subunit	Suclg1	1	0.891676	0.899342	0.75051	1.33208	1.09983	0.950135	1.37553		-0.776279	-3.31335	0.998833	-2.61851	0.614233	-0.873914	0.999995
1545	98013	AA145022	expressed sequence C78549	C78549	1	0.789363	0.956421	0.855857	1.00115	1.19785	1.24119	1.48479		0.9671	-2.86055	0.992417	0.738421	0.614233	0.999791	1
1546	72198	AA144221	RIKEN cDNA 2610528A15 gene	2610528A15Rik	1	0.618592	1.06525	1.01643	1.2084	0.810281	0.898322	1.07128		-3.22973	-1.26042	-0.544034	-3.47437	0.694898	-3.09797	0.667384
1547	20005	AA163183	ribosomal protein L9	Rpl9	1	0.888518	0.887906	0.827744	1.22544	1.29315	1.47668	2.03942		0.89312	0.289187	-3.49539	0.926859	1	1	1
1548	71978	AA168363	protein phosphatase 2 (formerly 2A), regulatory subunit B (PR 52), alpha isoform	Ppp2r2a	1	0.747282	0.920406	0.853887	1.20585	1.12461	1.25126	1.12393		0.908012	-0.371422	-0.566456	-1.75305	-0.392328	0.660189	0.674451
1549	14121	AI325573	fructose bisphosphatase 1	Fbp1	1	0.935207	1.01423	0.98802	1.27172	1.30458	1.25262	1.33692		-3.35902	-3.24718	-3.26427	0.99926	0.999753	0.993476	0.987086
1550		AA116745			1	0.929198	1.02785	0.840837	1.1147	1.0729	1.12653	1.33499		-0.999409	-3.43964	-3.17527	0.466161	0.388481	0.791324	0.411529
1551	67273	AA163564	NADH dehydrogenase (ubiquinone) 1 alpha subcomplex 10	Ndufa10	1	0.936385	1.03666	0.82836	1.24087	1.04118	0.959765	1.33524		-2.25042	-2.30452	0.660189	0.466161	-2.38486	0.805267	0.50689
1552	13131	W64787	disabled homolog 1 (Drosophila)	Dab1	1	1.22314						1.06696
1553	26462	W74987	thioredoxin reductase 2	Txnrd2	1	1.07805			1.6462		1.0583	1.24498
1554	14029	AA000473	even skipped homeotic gene 2 homolog	Evx2	1	1.03763	1.03012	1.00089	1.0485	1.09394	1.05462	1.05036		-2.14118	-2.66859	-2.38486	-2.05853	-2.86055	-3.60674	-0.704775
1555	22355	AA000726	vasoactive intestinal peptide receptor 2	Vipr2	1	0.841994	0.802004	0.933055	1.03155	0.978932	1.12067	1.07666		-1.39503	-1.53168	0.997789	-2.59319	-1.0764	-1.80867	-2.76635
1556	22355	AA000726	vasoactive intestinal peptide receptor 2	Vipr2	1	0.879324	0.789219	1.02427	1.09297	1.00778	1.21558	1.04425		-0.173192	-2.66859	-0.0463253	-3.58425	-3.15644	-1.89212	-2.00319
1557	55950	AI322495	brain protein I3	Bri3	1	1.0843	0.92603	0.806129	1.18299	0.971556	0.996667	1.19516		-2.30452	-2.27752	-0.752277	-1.9477	-2.79025	-0.330194	0.98121
1558	12558	AI323006	cadherin 2	Cdh2	1	0.939862	0.922593	0.916959	1.12326	1.308	1.3665	1.40252		-3.59618	0.163314	0.945101	0.791324	0.999697	0.999954	1
1559	11784	AA060361	amyloid beta (A4) precursor protein-binding, family A, member 2	Apba2	1	0.999246	0.862262	1.2866	1.0314	1.8763		1.02712		-3.60557	-3.32896	-0.634816	-3.40115	0.660189	-2.92862	-3.281
1560	19158	AA062131	pleckstrin homology, Sec7 and coiled-coil domains 2	Pscd2	1	0.795567	0.967455	0.901931	0.957866	1.07466	1.14811	1.184		0.652864	-1.66977	0.96971	-1.15457	-1.66977	0.914732	0.876103
1561	56613	AA061016	ribosomal protein S6 kinase, polypeptide 4	Rps6ka4	1	0.926774	0.980346	0.978736	1.06033	1.05163	1.06813	1.15345		-2.5677	-1.26042	-1.50421	-2.79025	0.275956	-0.392328	0.99093
1562	14312	AA097506	bromodomain containing 2	Brd2	1	0.703257	0.853753	0.731986	0.904535	0.810715	1.12225	1.31164		0.999998	0.959083	0.805267	0.766158	0.908012	-0.0815683	0.842337
1563		AA097283			1	0.949124	0.881513	1.19244	1.24984	0.894439	1.06812	0.94354		-3.55512	-3.59618	-0.999409	-2.49023	-1.42222	-3.03666	-2.92862
1564	11474	AA098356	actinin alpha 3	Actn3	1	0.80619	0.762924	0.839303	1.11778	1.05606	1.2427	0.907351		-0.923668	-0.117615	0.476587	-1.80867	-2.69334	-2.64365	-3.54029
1565	53419	AA062275	low density lipoprotein receptor-related protein 4	Lrp4	1	0.838027	0.5114	1.13522	1.05284	1.96704	1.20514	0.990045		-3.31335	0.206985	0.980109	-3.57397	-2.92862	0.994043	-0.923668
1566	20528	AA066475	solute carrier family 2 (facilitated glucose transporter), member 4	Slc2a4	1				1.62211
1567	12870	AA106138	ceruloplasmin	Cp	1	0.962008	0.980308	0.970549	1.09818	0.878369	0.915697	1.01755		0.674451	-1.6144	-1.10233	-0.230574	0.0217543	-0.371422	-1.42222
1568	21808	AA068104	transforming growth factor, beta 2	Tgfb2	1	0.744544	0.639043	1.11725	0.873023	2.1861	1.11527	1.20288		-3.59267	-1.8643	-2.43782	-2.81392	-3.57934	-3.42722	-2.43782
1569	15529	AA106952	syndecan 2	Sdc2	1	0.940094	0.996616	0.694721	1.29225	0.773983	0.827729	1.06573		-3.5322	-2.90619	0.987457	-3.56186	0.535764	-3.21192	0.879097
1570	320184	AI325749	RIKEN cDNA C330018J07 gene	C330018J07Rik	1	0.941551	1.10506	0.799766	1.18754	1.27079	1.32288	1.46802		-0.94877	-3.07784	-2.3582	0.766158	0.990086	0.999999	0.99999
1571		AA114636			1	0.974913	1.00263	0.739489	1.0849	1.11152	1.11289	1.4555		-1.58677	-0.521796	0.163314	-3.58869	-0.434721	0.895743	0.999985
1572	13207	AA120483	DEAD (Asp-Glu-Ala-Asp) box polypeptide 5	Ddx5	1	0.797694	0.802007	0.617406	1.02344	0.959439	1.27127	1.47889		0.248933	0.884892	0.997925	-3.46322	-3.4851	0.926859	0.986312
1573		AI325773			1	0.792836	0.840841	1.02675	1.21111	1.10143	1.33879	1.32501		0.960175	-0.19212	-3.59267	0.876103	0.148371	0.999687	0.998629
1574	15481	AA117004	heat shock protein 8	Hspa8	1	0.731863	0.842937	0.844416	1.07965	0.915961	1.13492	1.22969		0.996677	0.900817	-3.60392	-0.704775	-3.22973	-1.02494	-2.33141
1575	14055	AA124068	enhancer of zeste homolog 1 (Drosophila)	Ezh1	1	1.09434	0.771692	0.871676	1.12539	0.921348	1.11354	1.08179		-3.35902	0.315097	0.923003	0.00503458	-0.999409	-0.752277	-2.66859
1576	20130	AA123466	Harvey rat sarcoma oncogene, subgroup R	Rras	1	0.848365	0.903013	0.999675	1.01151	0.892311	1.08571	1.22444		0.781554	-2.30452	-1.5592	-2.69334	-1.58677	-1.89212	-0.117615
1577	14470	AA123361	Rab acceptor 1 (prenylated)	Rabac1	1	0.799356	0.950317	0.939904	1.14683	1.05289	1.26535	1.36403		0.97576	0.206985	0.905667	-1.6975	0.701468	0.993071	0.999861
1578		AA139714			1	0.88298	0.978418	1.03141	1.4344	1.35607	1.63841	2.1304		-3.54793	0.805267	-0.800447	1	1	1	1
1579	66204	AA142466	acylphosphatase 1, erythrocyte (common) type	Acyp1	1	0.858901	0.867018	0.89457	1.17848	1.00671	1.00114	1.18602		-2.19596	0.842337	0.866721	-2.11369	-2.27752	-0.47788	0.580825
1580	14797	AA153668	amino-terminal enhancer of split	Aes	1	0.99049	0.876011	0.804039	1.11591	0.996575	1.03775	1.03158		-3.5322	-0.999409	0.614233	-2.4641	-2.81392	-3.56186	-2.97268
1581	21940	AA153731	tumor necrosis factor receptor superfamily, member 7	Tnfrsf7	1	0.819656	0.874953	0.804871	1.04791	1.11298	1.35093	1.37317		-0.269827	-3.46322	0.949295	-0.728441	-2.19596	0.637818	0.738421
1582	16412	AA163412	integrin beta 1 (fibronectin receptor beta)	Itgb1	1	0.982996	0.927667	0.793469	0.982092	1.09879	1.19706	1.27985		-2.25042	0.597815	0.983718	-2.25042	-1.10233	0.89312	0.890438
1583	22720	AA162549	zinc finger protein 62	Zfp62	1	0.745258		1.31134	1.33287	1.02444	1.0761	1.08992		-0.250101	-2.79025	-2.95079	-3.17527	-3.32896	-3.35902	-1.34091
1584	22260	AA162659	nuclear receptor subfamily 1, group H, member 2	Nr1h2	1	0.835476	1.00576	0.939608	1.08837	1.07206	1.07915	1.11831		0.660189	-3.56815	0.849676	-3.22973	-1.36793	-1.28716	0.863456
1585	14852	AA168982	G1 to phase transition 1	Gspt1	1	0.866161	0.985597	1.04145	0.867286	1.06726	1.30349	1.533		0.178064	0.749837	-0.923668	-0.800447	0.910303	0.982755	0.971342
1586	18032	AA142474	nuclear factor I/X	Nfix	1	0.887351	0.948365	0.939249	1.02975	0.890272	0.997134	1.01117		0.869916	0.00503458	-1.36793	-2.8835	0.422794	-0.413428	0.56325
1587	17991	AA162428	NADH dehydrogenase (ubiquinone) 1 alpha subcomplex, 2	Ndufa2	1	0.809711	0.753198	1.01006	1.15578	0.934495	0.876667	1.12175		-0.589062	0.995187	-3.42722	-2.16861	-2.49023	-3.32896	0.117899
1588	27050	AA165925	ribosomal protein S3	Rps3	1	0.785419	1.11372	0.817245	1.34491	1.22893	1.28393	1.48021		0.879097	0.45557	-3.24718	0.991195	0.999987	0.999987	0.999994
1589	21974	AA170358	topoisomerase (DNA) II beta	Top2b	1	0.914566	0.726359	1.01757	0.946796	1.00687	1.12192	1.17424		-3.49539	0.94059	-0.117615	0.49695	-3.50525	-0.0290049	-1.80867
1590	18477	AA170669	peroxiredoxin 1	Prdx1	1	1.00219	1.02373	0.687558	1.19213	1.05629	1.35379	1.52521		-2.38486	-3.26427	-2.99429	0.606095	0.681391	0.999998	0.999894
1591	53381	AA170690	peroxiredoxin 4	Prdx4	1	0.956556	1.01351	0.850148	1.15475	0.99247	1.02652	1.10761		-1.9477	-1.34091	-0.309874	-1.31399	-3.29736	0.738421	-1.6975
1592	11843	AA170620	ADP-ribosylation factor 4	Arf4	1	0.956567	0.770016	0.74435	1.2074	1.13559	1.29946	1.14167		-1.34091	-0.434721	-0.47788	0.707918	-2.95079	-0.566456	-2.97268
1593	19651	AA162520	retinoblastoma-like 2	Rbl2	1	0.84991	0.868562	0.830153	0.930989	0.967348	0.999344	1.14715		-1.26042	-2.59319	0.791324	0.924953	-3.34418	-3.60557	0.433888
1594	16000	W10072	insulin-like growth factor 1	Igf1	1	1.01746	0.997419	0.802913	0.862823	0.880536	0.940207	0.699973		-3.17527	-2.95079	0.660189	0.206985	0.660189	-0.0290049	0.946533
1595	12387	W10023	catenin beta	Catnb	1	1.06945	0.900404	0.994932	1.27349	0.886975	1.13013	1.06361		-2.86055	-1.91992	-2.61851	-1.23379	-2.43782	0.781554	-1.0764
1596		W10680			1	0.813651	0.763321	1.16841	1.08657	1.29936	1.04377	1.05455		0.924953	-0.173192	-0.898715	-3.4851	-2.66859	-1.39503	0.364733
1597	14085	W12834	fumarylacetoacetate hydrolase	Fah	1	0.946267	1.00344	0.925482	1.15906	1.10762	1.03488	1.20269		-2.51621	-1.72527	-1.50421	0.526295	0.701468	-3.60181	-0.65796
1598	20817	W12836	serine/arginine-rich protein specific kinase 2	Srpk2	1	0.905393	0.831652	0.906769	1.04961	0.97838	1.22406	1.16188		-3.03666	0.994394	0.652864	-2.92862	-3.26427	0.926859	0.97576
1599	14735	W12478	glypican 4	Gpc4	1	0.903591	0.846849	0.887162	1.04563	1.03813	0.970932	1.03693		0.749837	0.997245	0.99757	-1.34091	-3.38751	-2.16861	-3.60557
1600	13039	AA174215	cathepsin L	Ctsl	1	0.753801	0.902266	0.719278	0.864042	0.708024	0.73887	0.961128		0.0382745	-0.211247	0.967992	0.908012	0.999937	0.999392	0.985908
1601	20677	W14398	SRY-box containing gene 4	Sox4	1	0.95338	0.929014	0.821571	1.1348	1.09967	1.19931	1.27738		-0.999409	0.163314	0.995873	0.949295	-1.9477	0.999935	0.999999
1602	19024	W12503	protein tyrosine phosphatase, receptor-type, F interacting protein, binding protein 2	Ppfibp2	1	1.01876	0.978772	0.890369	1.01543	1.02851	1.14113	1.18977		-3.5322	-3.22973	0.987819	-1.18086	-3.56186	-0.0638463	0.973638
1603	17158	W09023	mannosidase 2, alpha 1	Man2a1	1	0.821668	0.781853	0.650074	0.988517	1.01297	0.825183	0.956178		-0.230574	0.999922	0.994043	-2.99429	-2.27752	0.945101	0.995038
1604	16782	W09048	laminin, gamma 2	Lamc2	1	0.851157	1.05308	0.916862	1.40009	1.04115	0.836609	0.66187		0.262538	-0.269827	0.994884	-3.13727	-2.08614	-2.79025	-1.20727
1605	13479	W08886	dipeptidase 1 (renal)	Dpep1	1				1.30346			1.42134
1606	13091	AI893885	cytochrome P450, family 2, subfamily b, polypeptide 20	Cyp2b20	1	1.1273	1.00104	0.486923	0.888531	0.929767	1.01136	1.12802		-1.6975	-3.56815	0.999985	-3.01562	0.070718	-3.59923	-3.58869
1607		W12626			1	0.957196	0.687451	0.840474	1.21142	0.840964		1.18819		-3.31335	-3.60181	-2.71789	-3.07784	-3.46322	-2.92862	-3.60674
1608	27055	W13698	FK506 binding protein 9	Fkbp9	1	0.84388	1.03768	1.00243	1.01401	1.10309	1.34835	1.23968		0.950627	-3.29736	0.879097	0.221158	0.876103	0.9991	0.999563
1609	18751	W13213	protein kinase C, beta	Prkcb	1	0.944897	0.767452	1.04361	1.01945	0.883697	1.31087	1.23281		0.102369	0.814105	-3.07784	-3.45164	-3.42722	0.340275	0.971342
1610	13429	W13111	dynamin	Dnm	1	0.754279	0.771722	0.881851	1.10626	1.0568	1.09053	1.15309		0.968862	0.990656	0.0217543	0.466161	-3.43964	-2.86055	0.846045
1611	17777	W13053	microsomal triglyceride transfer protein	Mttp	1	0.937546	0.919945	1.03115	1.1987	1.26139	1.23218	1.509		0.898308	0.178064	-0.0994912	0.830735	0.999962	0.999994	1
1612	15203	W11571	hephaestin	Heph
1613	20648	W34029	syntrophin, acidic 1	Snta1	1	0.83971	0.835775	1.00823	1.11793	1.07237	1.02837	0.943006		-0.974018	-0.250101	0.667384	-2.19596	-0.47788	-1.05061	-2.76635
1614	12560	W12889	cadherin 3	Cdh3	1	0.786508	0.718897	0.854367	1.10591	1.00455	1.32372	1.26619		0.614233	0.999894	0.873043	-1.44948	-3.50525	0.960175	0.526295
1615	13628	W11762	eukaryotic translation elongation factor 1 alpha 2	Eef1a2	1	0.910844	0.795932	0.938372	1.0924	0.843345	0.913316	1.22593		0.221158	-1.26042	0.943633	-1.39503	-2.4641	-3.43964	0.996464
1616	20597	W14928	sphingomyelin phosphodiesterase 1, acid lysosomal	Smpd1	1	0.797681	0.928872	0.851679	1.24495	1.17518	1.28121	1.13256		0.749837	-2.54204	0.95443	-0.521796	0.707918	0.970537	0.863456
1617		W14312			1	0.827873	0.916969	0.973078	1.20697	0.990775	1.06716	1.13023		0.999943	0.19262	0.994394	-1.39503	0.991949	0.726563	0.99989
1618	19141	W14837	legumain	Lgmn	1	0.772608	0.985688	1.02913	1.31637	1.19822	1.28018	1.38404		0.951926	-0.269827	-3.57934	0.630093	0.991195	0.99989	1
1619	11792	W08299	apurinic/apyrimidinic endonuclease 1	Apex1	1	0.878117	0.974093	1.23304	1.44483	1.39235	1.37406	1.38925		0.545078	-3.52366	0.19262	0.999986	1	0.999999	0.999984
1620	12351	W08694	carbonic anhydrase 4	Car4	1	0.997495	0.782016	1.01995	0.881791	1.05066	1.10694	1.10411		-0.898715	0.554239	0.681391	-1.6144	-0.974018	-0.776279	0.422794
1621		AI391213			1	0.848953	0.760806	0.80659	1.07368	1.06342	1.23355	1.37158		-0.94877	0.991454	0.986312	-1.97546	-3.58425	0.905667	0.999874
1622	16773	W18311	laminin, alpha 2	Lama2	1	0.879293	0.97739	1.11045	1.06726	1.09849	1.32576	1.18459		-0.154466	-3.38751	-3.49539	-1.5592	-1.02494	0.999971	0.990086
1623	14227	W15971	FK506 binding protein 2	Fkbp2	1	0.952164	0.910983	0.871558	1.16849	0.955657	1.03779	1.06125		-1.42222	0.388481	0.760823	0.814105	-2.99429	-3.13727	-2.74222
1624	12833	W16221	procollagen, type VI, alpha 1	Col6a1	1	0.90735	0.921072	1.02097	1.11363	1.0655	1.17423	1.20089		-3.45164	-1.44948	-3.42722	-0.800447	0.0545955	0.826705	0.786487
1625	66467	W36917	DNA segment, Chr 17, Wayne State University 155, expressed	D17Wsu155e	1	0.905015	1.05748	0.971005	0.998405	1.09131	1.20968	1.23431		0.275956	-1.42222	-3.21192	-3.43964	-0.681281	0.667384	0.961241
1626	21894	W17813	talin	Tln	1	1.0457	1.04043	1.04487	1.16456	0.9753	1.0637	1.03811		-0.211247	-2.99429	-0.728441	0.94213	-3.21192	0.791324	-2.79025
1627	12796	W17771	cathelicidin antimicrobial peptide	Camp	1	0.86175	0.818206	0.924749	1.11609	1.12145	1.26057	1.23857		0.572111	0.597815	0.98121	0.997645	0.070718	0.849676	0.99995
1628	18979	W17967	paraoxonase 1	Pon1	1	0.926241	1.01806	0.865813	0.989181	1.116	1.06255	1.1802		-3.56815	-1.12839	0.963293	-1.23379	-2.16861	-3.43964	-2.11369
1629	381234	W36541	similar to G protein-coupled receptor kinase 5	na	1	0.911892	1.00551	0.91247	1.25568	1.44131	1.37613	1.28555		0.97576	-1.80867	-3.35902	0.999769	1	0.999999	1
1630	11425	W36685	apolipoprotein C-IV	Apoc4	1	0.944707	1.04178	0.996974	1.03875	1.09651	1.03674	1.01832		-3.43964	-3.15644	-3.07784	0.248933	0.809731	-2.92862	-2.66859
1631	22287	W36838	secretoglobin, family 1A, member 1 (uteroglobin)	Scgb1a1	1	1.15303	0.839995	0.828503	1.05008	1.07781	1.10089	1.16198		-0.289752	-2.71789	-2.30452	-0.873914	-2.95079	-0.35071	-0.849267
1632	19042	W18642	protein phosphatase 1A, magnesium dependent, alpha isoform	Ppm1a	1	0.882479	0.978762	0.841322	0.898406	1.04519	1.05232	1.05944		0.50689	-1.05061	0.928721	-1.42222	-3.40115	-3.21192	-3.56186
1633	20604	W20888	somatostatin	Sst	1	0.925779	0.768529	1.09872	0.761731	1.0174	1.19907	1.25403		-1.36793	0.992641	-0.413428	0.991949	0.805267	0.476587	0.982254
1634	14751	W29397	glucose phosphate isomerase 1	Gpi1	1	0.761467	0.912558	0.882408	1.11455	1.04988	0.909327	1.02529		0.998833	0.720464	0.895743	-1.53168	-3.4851	-0.330194	-3.35902
1635	27053	W29492	asparagine synthetase	Asns	1	0.900208	0.880717	1.48816	1.13944	1.3595	1.51344	1.44844		-2.81392	-2.99429	0.953194	-0.94877	0.898308	0.997719	0.993277
1636	13614	W29554	endothelin 1	Edn1	1	2.38303	1.11908	1.50091	1.33694	0.819201	1.13	0.862361		0.999392	-2.27752	0.148371	-0.752277	-1.53168	-3.07784	-1.9477
1637		W29525			1	1.02279	0.907254	1.02098	1.191	1.07292	1.15541	1.2102		-0.47788	-3.11778	-1.58677	-0.211247	-3.45164	0.694898	-0.0994912
1638	192236	W29855	Hermansky-Pudlak syndrome 1 homolog (human)	Hps1	1	0.908811	0.875109	0.855279	1.10804	0.95517	1.07964	1.05436		-2.08614	-1.89212	0.970537	0.221158	-1.42222	-0.589062	-1.34091
1639		AI385616			1	1.08553	0.705137	0.846539	0.858666	0.887484	1.25555	1.03796		-0.898715	0.985068	0.0545955	0.302234	-0.0463253	0.766158	-3.56815
1640	14061	W40725	coagulation factor II	F2	1	1.01759	1.00465	0.905031	1.02289	0.960155	1.0265	1.10645		-2.64365	-0.94877	-3.43964	-0.752277	-0.752277	-3.09797	-3.59267
1641	13619	W40777	early development regulator 1 (homolog of polyhomeotic 1)	Edr1	1	0.93246	0.997248	0.905827	1.08983	0.932109	1.14134	1.28701		-1.58677	-2.41141	-3.58869	-2.33141	-2.71789	0.070718	0.910303
1642	14571	W41175	glycerol phosphate dehydrogenase 2, mitochondrial	Gpd2	1	0.941553	0.895155	0.840917	0.815179	0.744368	0.724742	0.815405		-2.64365	0.652864	-0.250101	0.953194	0.999987	0.999994	0.998391
1643	22174	W41438	TYRO3 protein tyrosine kinase 3	Tyro3	1	1.06669	0.972202	0.911527	0.967237	1.07743	1.13531	1.54346		-3.49539	-0.413428	-3.60745	-3.24718	-0.849267	0.411529	0.999676
1644	12683	W41358	cell death-inducing DNA fragmentation factor, alpha subunit-like effector A	Cidea	1	0.936848	0.921074	0.986326	0.951811	1.10536	1.07477	1.2207		0.289187	0.786487	-3.26427	-2.76635	0.56325	-1.53168	0.98463
1645	67305	W35981	RIKEN cDNA 3110050F08 gene	3110050F08Rik	1	0.769207	0.925701	0.972468	1.20689	1.14913	1.23704	1.30604		0.99757	-0.47788	0.771391	0.956814	0.924953	0.999518	0.999945
1646	21853	W34732	timeless homolog (Drosophila)	Timeless	1	0.896567	1.00441	1.07766	1.14648	1.26786	1.46942	1.29552		0.989482	0.23514	-3.13727	0.995998	0.999995	1	1
1647		W34802			1	0.841449	0.772746	0.973749	1.15267	0.988219	0.936439	0.936697		0.997858	0.999392	0.999008	-0.776279	0.645407	-3.60557	-2.64365
1648	14583	W41682	glutamine fructose-6-phosphate transaminase 1	Gfpt1	1	0.719946	0.864315	1.04952	1.1639	1.1953	1.37013	1.36988		0.999983	0.999925	0.535764	0.999898	0.99998	1	1
1649	20617	W41663	synuclein, alpha	Snca	1	0.843976	0.714014	1.11151	0.931341	0.98958	1.339	1.30115		0.786487	0.977723	-0.776279	-2.8835	-3.281	0.987086	0.930539
1650	19288	W42321	pentaxin related gene	Ptx3	1	0.83541	0.869545	1.13276	0.826425	0.966329	1.14926	1.18657		0.23514	0.879097	0.99093	-0.611849	-0.19212	-0.776279	0.738421
1651	66587	W42367	Fas-activated serine/threonine kinase	Fastk	1	0.809268	0.955815	0.889208	1.0745	1.02657	0.958115	1.06721		0.996779	0.364733	0.993476	-1.80867	-3.41439	-3.59618	-2.81392
1652	15182	W46034	histone deacetylase 2	Hdac2	1	0.868958	0.972726	0.823258	1.01461	1.12078	1.24734	1.34087		-0.898715	-0.0463253	0.971342	-2.00319	0.916872	0.994884	0.998585
1653	21938	W45975	tumor necrosis factor receptor superfamily, member 1b	Tnfrsf1b	1	0.741595	0.9351	0.968967	0.980753	1.1456	1.16965	1.23526		0.921006	-1.64206	0.526295	-2.05853	-2.11369	0.476587	0.928721
1654		W48168			1	1.08659	0.859181	0.978586	1.06828	1.33872	1.42225	1.57239		0.86012	0.955637	0.589392	0.999967	0.999994	1	1
1655	19730	W48230	ral guanine nucleotide dissociation stimulator	Ralgds	1	1.00929	1.09245	1.12627	1.20777	1.15909	1.25023	1.48659		0.988512	0.990086	-0.456206	0.991454	0.928721	0.999861	0.999965
1656	11482	W48139	activin A receptor, type II-like 1	Acvrl1	1	0.876341	0.841059	1.13276	1.03613	1.02861	0.930343	0.942018		-2.43782	0.714249	0.995187	-3.56186	-1.72527	-3.43964	-2.30452
1657	15904	W48116	inhibitor of DNA binding 4	Idb4	1	0.893828	1.36023	1.00398	0.934953	0.972661	1.22281	1.09774		-1.97546	-3.09797	-2.79025	-0.752277	-3.11778	0.56325	0.973638
1658	13353	W54234	DiGeorge syndrome critical region gene 6	Dgcr6	1	0.979601	1.12164	0.932085	1.18434	1.07016	1.09123	1.15032		-1.44948	-2.71789	0.545078	0.444813	0.00503458	0.950627	0.993476
1659	17967	W54389	neural cell adhesion molecule 1	Ncam1	1	0.926514	0.910905	1.00367	0.835872	1.03588	1.14818	1.09541		0.943633	-0.011885	0.995873	0.970537	-3.37346	0.999991	0.945101
1660	17523	W55655	myeloperoxidase	Mpo	1	0.91557	0.820519	0.996489	1.11587	1.00827	0.976862	0.834404		0.400092	0.890438	0.995873	-3.60674	-3.60768	-1.91992	-3.56815
1661	103768	W50677	tubulin, gamma 2	Tubg2	1	0.916823	1.0017	0.839944	0.986109	0.932609	1.06076	0.972172		0.960175	0.983243	0.992641	0.400092	-3.37346	0.900817	-0.544034
1662	14860	W54349	glutathione S-transferase, alpha 4	Gsta4	1	1.11134	1.02619	1.02287	1.58156	1.4834	1.73272	1.74802		-2.25042	-1.47681	-3.40115	0.999999	0.999998	1	1
1663	18718	W58969	phosphatidylinositol-4-phosphate 5-kinase, type II, alpha	Pip5k2a	1	1.1547	0.804678	0.998309	1.13847	0.987918	0.966017	0.863303		-3.17527	0.86012	-2.54204	-2.92862	-2.51621	0.388481	-2.79025
1664	14276	W59165	folate receptor 2 (fetal)	Folr2	1	1.05741	0.925222	1.16163	1.05031	0.942292	1.25435	1.08971		-3.60181	-3.03666	-3.13727	0.89312	-3.56186	0.945101	-2.33141
1665	16993	W63957	leukotriene A4 hydrolase	Lta4h	1	0.89293	1.03066	0.952616	1.04775	0.999012	1.0199	0.960447		-3.01562	-3.40115	-0.456206	-3.281	-0.521796	-2.59319	-3.45164
1666	13178	W62508	deoxycytidine kinase	Dck	1	1.26395	0.892101	0.996777	0.997314	1.07316	0.812753	0.859		-1.9477	0.56325	0.411529	-2.83735	-0.173192	-1.9477	0.400092
1667	27528	W62819	DNA segment, human D4S114	D0H4S114	1	0.930697	0.862862	0.719284	1.01353	0.96326	1.04204	1.00714		-3.58869	-2.3582	0.987819	-2.54204	-2.43782	-3.59267	-2.54204
1668	15181	W62765	histone deacetylase 1	Hdac1	1	0.900238	1.03159	0.748115	1.10432	0.942901	1.16224	1.19662		-1.6975	-3.32896	0.972127	-3.4851	-3.60392	-1.64206	0.995187
1669	13852	W64796	epimorphin	Epim	1	0.938658	1.0443	0.867785	1.23008	1.13971	1.32738	1.3494		-1.44948	-3.49539	-3.37346	0.597815	0.94059	0.998285	0.994221
1670	22200	W62229	ubiquitin-activating enzyme E1C	Ube1c	1	0.929595	0.810444	0.975239	1.15048	1.02967	1.36982	1.26149		-2.83735	0.876103	0.834683	-1.26042	0.918963	0.999548	0.999898
1671	15388	W65080	heterogeneous nuclear ribonucleoprotein L	Hnrpl	1	0.842295	0.988599	0.824245	1.16839	0.81109	1.01904	1.06488		0.667384	-0.392328	0.796065	-1.5592	-0.47788	-3.38751	-3.46322
1672	11489	W65081	a disintegrin and metalloproteinase domain 12 (meltrin alpha)	Adam12	1	0.974964	0.893375	0.6171	0.959673	1.08703	1.11666	1.22897		-2.33141	0.364733	0.826705	-3.31335	-3.24718	-0.211247	-1.6144
1673	51800	W65005	Bcl-2-related ovarian killer protein	Bok	1	0.936519	1.00319	0.669341	1.42483	1.29133	1.30995	1.7886		0.997719	0.302234	-0.289752	1	1	1	1
1674	16468	W65025	jumonji	Jmj	1	0.824527	1.01825	0.951232	1.0572	1.05725	1.06984	0.964625		-0.0463253	0.94213	0.882026	0.45557	-2.08614	-2.05853	-2.66859
1675	13395	W65729	distal-less homeobox 5	Dlx5	1	0.946975	0.942921	0.884156	1.19947	1.12817	1.47418	1.29252		-0.94877	-0.0463253	-0.776279	0.999548	0.50689	0.99999	0.996779
1676	19725	W70909	regulatory factor X, 2 (influences HLA class II expression)	Rfx2	1	0.776358	1.38065		0.808678	0.936774	0.634486	3.75168		-3.11778	0.433888	-2.16861	-2.49023	-3.41439	0.884892	-1.10233
1677	16881	W66626	ligase I, DNA, ATP-dependent	Lig1	1	1.0384	0.907174	0.828147	1.01938	0.868184	1.15527	0.933166		0.19262	-2.92862	0.86012	-1.6144	0.486849	-1.53168	-2.64365
1678	15275	W74835	hexokinase 1	Hk1	1	1.0491	0.859717	0.95894	0.925214	0.999754	0.934077	1.17377		-0.230574	-0.250101	0.918963	0.206985	-0.873914	-2.97268	0.9671
1679	53602	W70646	hippocalcin-like 1	Hpcal1	1	0.952408	0.801556	1.03304	0.829947	1.30152	1.07899	1.10583		-2.54204	-2.27752	-2.97268	-2.4641	-0.269827	-3.43964	-2.43782
1680	18131	W76913	Notch gene homolog 3 (Drosophila)	Notch3	1	1.05257	1.02823	0.839155	0.959466	1.07509	1.25135	1.30197		-1.26042	-1.20727	-0.589062	-0.0290049	-0.94877	0.963293	0.997067
1681	14228	W77113	FK506 binding protein 4	Fkbp4	1	0.82583	0.940106	0.985829	1.15836	1.23856	1.43368	1.43918		0.98418	-2.76635	-3.21192	-0.0815683	1	1	1
1682	18552	W98241	proprotein convertase subtilisin/kexin type 5	Pcsk5	1	0.806316	0.799994	0.923625	0.897287	1.00533	0.965439	1.01483		0.688206	0.967992	0.99823	0.726563	0.887696	-0.873914	-0.269827
1683	16682	W98341	keratin complex 2, basic, gene 4	Krt2-4	1	0.900138	0.892581	1.03552	0.905085	1.07273	1.27994	1.16547		-3.22973	-3.43964	-2.4641	-3.09797	-3.38751	0.117899	-0.434721
1684	17955	W78317	nucleosome assembly protein 1-like 4	Nap1l4	1	0.875506	0.896784	0.823359	1.04143	1.06638	1.29336	1.20033		0.967992	0.923003	0.994884	0.572111	0.178064	0.999501	0.998673
1685	12968	W78478	crystallin, gamma E	Cryge	1	0.938693	0.840261	1.10086	0.895529	0.935877	1.13412	0.996087		-3.40115	0.0866423	-1.36793	-3.60674	-0.456206	0.23514	-2.64365
1686	26362	W78330	AXL receptor tyrosine kinase	Axl	1	0.931489	0.912896	1.06668	1.03827	1.08537	1.28422	1.03446		0.163314	-1.44948	-3.26427	0.340275	-1.42222	0.994043	-0.13594
1687	17918	W80031	myosin Va	Myo5a	1	0.877462	0.89606	1.07265	0.93464	1.05823	1.0418	0.902314		-2.03088	-1.47681	0.834683	-2.4641	-1.31399	0.275956	-0.392328
1688	12904	W81912	cellular retinoic acid binding protein II	Crabp2	1	0.996556	1.01179	1.06384	1.3194	1.17528	1.2769	1.04076		-3.45164	-2.90619	-1.53168	0.994725	-3.43964	0.998285	0.400092
1689	13101	W81792	cytochrome P450, family 2, subfamily d, polypeptide 10	Cyp2d10	1	0.890758	0.937912	0.987481	0.922807	0.936309	1.18884	1.15835		-0.94877	-2.25042	-1.8643	-2.41141	-2.69334	-2.16861	-1.50421
1690	50706	W81878	expressed sequence AI747096	AI747096	1	1.03307	1.11334	0.673445	0.952554	0.8679	0.934274	0.844384		-3.37346	-3.13727	0.992859	-3.22973	0.908012	0.364733	-2.00319
1691	17390	W80177	matrix metalloproteinase 2	Mmp2	1	0.845596	0.931225	0.794459	1.14602	1.30562	0.946087	1.12282		-3.01562	-1.39503	0.818391	-3.21192	-0.824777	-3.60745	-1.36793
1692		W82873			1	0.986928	0.906381	0.737567	1.01103	0.998254	1.14579	1.13097		-3.42722	0.444813	0.999563	-1.44948	-2.71789	0.822591	0.526295
1693	68196	W82182	heat shock factor binding protein 1	Hsbp1	1	0.87392	1.08008	0.844595	1.20858	1.05379	1.14529	1.1866		0.99093	-1.15457	0.977086	0.977086	0.96971	0.999941	1
1694	14131	W82159	Fc receptor, IgG, low affinity III	Fcgr3	1	0.833496	1.05563	0.970656	1.08353	1.12085	1.34286	1.4195		0.976432	-2.59319	-0.392328	-0.0994912	0.989482	0.999995	0.999999
1695	12153	W82677	bone morphogenetic protein 1	Bmp1	1	0.853199	0.952227	0.86979	1.21182	1.02035	1.19627	1.04175		0.597815	0.526295	-0.704775	0.660189	-2.79025	0.924953	-3.42722
1696	12959	W82104	crystallin, beta A4	Cryba4	1	0.912811	1.04959	1.13923	1.27673	0.929857	1.07394	0.758679		-2.14118	-3.59923	-2.08614	-1.47681	0.0382745	-2.71789	-3.35902
1697	16006	W83086	insulin-like growth factor binding protein 1	Igfbp1	1	1.05096	0.698799	0.722256	0.755932	0.563136	1.08862	1.2044		-3.4851	-0.173192	-0.499744	-0.999409	0.842337	-3.26427	-2.16861
1698	54405	W83104	NADH dehydrogenase (ubiquinone) 1 alpha subcomplex, 1	Ndufa1	1	0.937989	0.930628	0.85578	1.07654	1.0776	1.26214	1.22785		-3.13727	0.966184	0.846045	0.56325	-0.521796	0.99926	0.997645
1699	22084	W82751	tuberous sclerosis 2	Tsc2	1	0.888895	1.02951	0.962707	1.25277	0.942038	0.949171	0.963524		0.923003	-1.10233	0.999995	0.999284	-1.53168	-0.13594	-3.46322
1700	109979	W82798	ADP-ribosyltransferase 3	Art3	1	0.933944	0.93854	0.927449	0.950454	0.943235	1.14886	1.1015		-2.27752	-1.6144	0.999467	-3.47437	-0.499744	-2.95079	0.882026
1701	12257	W82946	benzodiazepine receptor, peripheral	Bzrp	1	0.822683	1.07973	1.07086	1.0144	0.96185	0.942474	1.10244		0.726563	-3.5322	-2.16861	-3.60768	-3.58425	-3.40115	0.606095
1702	21406	W83524	transcription factor 12	Tcf12	1	1.02095	0.985983	0.714198	0.968126	1.12259	1.20918	1.35314		-1.97546	-2.38486	0.999129	-2.8835	-3.60674	0.776522	0.999994
1703	17768	W84014	methylenetetrahydrofolate dehydrogenase (NAD+ dependent), methenyltetrahydrofolate cyclohydrolase	Mthfd2	1	0.871503	0.915566	0.95161	0.985086	1.12751	1.25831	1.3896		-3.37346	-2.74222	0.554239	0.163314	-0.728441	0.275956	0.995038
1704	12819	W83331	procollagen, type XV	Col15a1	1	1.0986	1.06148	1.10802	0.849311	1.03187	1.22496	1.10433		-2.22323	-2.59319	0.262538	-2.74222	-3.31335	0.974364	0.999961
1705	384972	W83609	similar to Retinol-binding protein I, cellular (Cellular retinol-binding protein) (CRBP)	na	1	0.757866	1.00413	1.10168	1.07892	1.09294	0.944307	1.10198		0.916309	-1.76455	-1.67465	-2.03601	-1.54489	-1.35184	-1.03439
1706	12952	W83558	cryptochrome 1 (photolyase-like)	Cry1	1	0.930154	0.82641	0.82361	0.890902	0.855872	0.992952	1.0732		-1.10679	0.556868	0.998756	0.275211	0.775995	-1.5296	-2.01518
1707	13481	W83728	dolichol-phosphate (beta-D) mannosyltransferase 2	Dpm2	1	0.778039	0.850336	1.04261	0.952377	1.12438	1.25281	1.18705		0.999975	0.996304	-1.23132	0.700114	0.989267	0.999572	0.999967
1708	12876	W83974	carboxypeptidase E	Cpe	1	0.756371	0.760654	0.907119	1.11479	1.06484	0.978289	0.898522		0.981626	0.997877	0.981109	-1.05256	-1.40191	-1.82205	-1.03439
1709	16391	W84302	interferon dependent positive acting transcription factor 3 gamma	Isgf3g	1	0.890303	0.855481	0.84356	1.01213	0.907916	1.06805	1.11734		-0.139395	0.995001	0.397911	0.964754	0.936235	0.780738	-1.66098
1710	13136	W83988	decay accelerating factor 1	Daf1	1	0.799709	0.836125	0.779417	1.13654	0.906075	1.06028	1.08676		0.924121	0.589115	0.994196	-1.49854	0.712093	-1.60437	-1.36865
1711	20533	W85633	solute carrier family 4 (anion exchanger), member 1	Slc4a1	1	0.933038	0.781549	1.09685	1.04524	1.01568	1.1349	1.04923		-1.46689	0.954211	-0.687032	-1.883	-1.97609	0.990711	-1.51415
1712	12767	W88094	chemokine (C-X-C motif) receptor 4	Cxcr4	1	0.726563	0.797671	0.961558	1.00648	0.846856	0.959612	0.904476		0.947927	0.700114	0.953012	-1.84338	-2.03601	-1.33492	-1.16055
1713	19653	W88130	RNA binding motif protein 4	Rbm4	1	0.751025	0.826986	1.04439	0.977729	1.11511	1.1977	1.13921		0.983567	0.989571	0.366027	-1.56002	0.387414	0.835092	0.999496
1714		W87045			1	1.01849	0.837821	0.838435	1.03423	1.06635	1.23399	1.41093		-1.98201	-0.92482	0.987255	-0.108307	-1.91844	0.693974	0.990437
1715	12905	W85081	CASP2 and RIPK1 domain containing adaptor with death domain	Cradd	1	1.19432	0.951165	1.22428	0.910132	0.806331	0.933976	0.848373		-1.66098	-2.0374	-0.614704	-0.75992	-1.84338	-0.560948	-2.03492
1716	225884	W87197	cDNA sequence BC021614	BC021614	1	0.960956	1.39482	1.19496	1.69182	1.61809	1.71564	1.58774		-1.883	0.942348	0.548509	0.999997	0.999952	1	0.999996
1717	22059	W87149	transformation related protein 53	Trp53	1	0.830079	0.835486	0.922255	1.23094	1.05221	1.22817	1.14779		0.999807	0.997279	0.999997	0.983567	0.771167	1	0.999891
1718	18815	W99028	plasminogen	Plg	1	0.910993	1.01058	0.827113	1.01017	0.9308	0.931778	0.912714		-0.83315	-1.68813	0.992202	-1.35184	0.287026	-0.219044	0.951785
1719	15437	W99235	homeo box D8	Hoxd8	1	0.890647	0.778789	0.842463	0.981554	1.04105	1.21314	1.28785		-1.45084	0.775995	0.999739	0.868629	0.634019	0.175929	0.387414
1720	21804	W99117	transforming growth factor beta 1 induced transcript 1	Tgfb1i1	1	0.831223	0.835037	1.06	1.1585	1.02469	1.04874	1.05872		0.874574	0.961852	0.997279	-1.08876	-0.796506	0.964754	0.956525
1721	16948	W96914	lysyl oxidase	Lox	1	0.981452	0.836257	0.921331	0.925186	0.955569	1.28058	1.41546		-1.90998	0.740336	0.958733	0.945202	-0.906494	0.999572	0.931273
1722	19365	W88003	RAD52 homolog (S. cerevisiae)	Rad52	1	0.920262	0.851933	1.02173	1.02554	1.05651	1.19359	0.964976		0.925969	0.999957	0.999867	0.943791	0.011363	0.957642	0.896068
1723	16011	W89253	insulin-like growth factor binding protein 5	Igfbp5	1	0.990544	0.738686	1.06008	1.12567	1.01503	0.920529	0.945865		-1.94217	0.99619	0.99197	0.321676	-0.17093	-1.56002	-1.83284
1724	16211	W87958	karyopherin (importin) beta 1	Kpnb1	1	1.17805	0.881956	0.99737	0.89954	1.08605	1.16912	0.964038		0.823695	0.998398	0.785397	-0.420298	-1.93454	0.999989	0.681388
1725	18541	W89405	pericentrin 2	Pcnt2	1	1.05704	0.985738	1.06726	1.02415	1.04749	1.13643	1.29178		-1.16055	-0.778204	0.612078	0.989868	0.596884	0.989267	0.999966
1726		AI429619			1	0.893185	0.890311	1.06316	1.19732	0.970393	0.842721	0.853113		-1.40191	0.355137	0.995293	-1.7014	-1.10679	-1.95659	-1.72731
1727		W87981			1	1.07758	1.0256	0.616919	1.05952	1.16988	1.23482	1.47889		-1.87348	-1.97609	0.999974	0.201541	0.999407	0.996415	0.999923
1728	18073	W88036	nidogen 1	Nid1	1	1.11625	0.982477	0.87477	0.945958	1.23045	1.5801	1.51511		-1.23132	-1.77652	-0.2029	0.123131	0.967453	0.999988	1
1729	17685	W91178	mutS homolog 2 (E. coli)	Msh2	1	0.962735	0.835394	0.935851	0.818677	1.10405	1.11194	1.26495		-1.7014	0.945202	-1.60437	0.997107	-0.155107	0.332962	0.88842
1730	14082	W91183	Fas (TNFRSF6)-associated via death domain	Fadd	1	0.93995	0.704546	1.06787	0.983392	0.915847	1.25745	1.2765		-1.99801	0.771167	-2.00275	-2.00275	-1.75236	-1.23132	0.979474
1731	17285	W89502	mesenchyme homeobox 1	Meox1	1	1.07923	0.797146	0.914922	0.820659	0.901973	1.25483	1.14618		-1.8637	-0.17093	-0.507702	-0.186861	0.988632	-0.219044	-1.81103
1732	13830	W89549	erythrocyte protein band 7.2	Epb7.2	1	1.0162	0.867592	0.879692	1.11117	1.08754	1.40847	1.48766		-1.08876	0.162925	-1.24881	0.98213	0.275211	0.999857	0.999206
1733	12988	W89819	c-src tyrosine kinase	Csk	1	0.977959	0.854935	1.16786	1.00663	1.20714	1.2033	1.07103		-1.98764	0.604538	-0.851484	-1.84338	0.960837	0.936235	-0.979712
1734	208836	W89816	cDNA sequence BC025462	BC025462	1	0.8643	0.888542	0.991486	1.06598	1.04287	1.10312	1.10543		-0.0776768	-0.796506	0.965676	-0.455042	-1.78825	-0.186861	-0.507702
1735	13865	W90859	nuclear receptor subfamily 2, group F, member 1	Nr2f1	1	1.0337	0.802463	0.94057	0.813318	0.987714	1.16376	1.20474		-0.741657	-1.24881	0.998939	-1.90998	-1.98201	-1.49854	0.831365
1736	19089	W91045	protein kinase C substrate 80K-H	Prkcsh	1	0.903646	0.905703	0.9321	1.03603	1.15204	1.20326	1.42289		-1.21374	-1.48279	0.612078	0.681388	0.980578	0.993655	0.999037
1737	14854	W91402	glutathione synthetase	Gss	1	0.852024	0.931624	0.965149	1.16388	1.299	1.75159	1.66431		0.984464	-0.155107	-0.403042	0.706153	0.999925	1	1
1738	12527	W98963	CD9 antigen	Cd9	1	0.898955	1.03799	0.991311	1.22153	1.134	1.25317	1.42555		-1.63305	-1.77652	-1.96338	0.977089	0.418516	0.925969	0.998675
1739	11803	W98956	amyloid beta (A4) precursor-like protein 1	Aplp1	1	0.916233	0.853038	0.861195	0.965464	1.10175	1.26226	1.25809		0.90325	0.771167	0.798876	-1.26622	0.123131	0.99197	0.988632
1740	20190	W97384	ryanodine receptor 1, skeletal muscle	Ryr1	1	1.03904	0.785901	0.944585	0.875335	1.11174	1.0326	1.10605		-1.58976	0.916309	0.983567	-1.0162	-1.21374	0.619504	-0.0326139
1741	22694	W97363	zinc finger protein 35	Zfp35	1	0.915904	0.71042	0.919937	1.12035	1.04896	1.26396	1.2704		-0.578814	0.994532	-0.578814	-1.60437	-2.0374	0.99781	0.989868
1742	18128	W98998	Notch gene homolog 1 (Drosophila)	Notch1	1	1.00028	0.914626	1.11788	1.83706	2.14012	3.43821	2.8042		-2.03353	-1.40191	-0.525389	0.999997	1	1	1
1743	97977	W97442	expressed sequence C81508	C81508	1	0.76618	0.835189	0.831169	0.908375	0.967772	1.2388	1.17223		0.967453	-0.00317354	0.999302	0.661729	-0.186861	-0.869822	-1.17835
1744	27632	W97403	RD RNA-binding protein	Rdbp	1	0.979316	0.76867	0.976658	1.1436	1.08202	1.29611	1.30227		-0.525389	-0.650785	0.634019	0.827566	-1.95659	0.997016	0.994532
1745	15417	W97853	homeo box B9	Hoxb9	1	0.795741	0.674534	1.02793	0.849884	0.968173	1.22904	1.137		0.905544	0.943791	0.891023	-0.741657	-1.16055	0.201541	-0.979712
1746	330260	W98586	paraoxonase 2	Pon2	1	0.816086	0.73139	0.814612	1.12487	1.04981	1.07649	1.16663		-0.0178328	0.984021	0.999586	-2.01134	0.428624	-1.60437	0.201541
1747		AI429818			1	0.831962	0.742917	0.912961	0.887233	1.0605	1.15528	1.08448		-0.420298	0.999231	0.997279	0.477241	-2.03183	-1.87348	-0.351767
1748	12015	W98547	Bcl-associated death promoter	Bad	1	0.89408	0.903362	0.890456	1.11142	1.09657	1.05619	1.01736		0.428624	-1.79976	0.996073	-1.883	-0.437632	-1.90998	-0.123794
1749	18971	W91387	polymerase (DNA directed), delta 1, catalytic subunit	Pold1	1	0.796296	0.876662	0.857968	1.22965	1.26205	1.20098	1.42048		0.896068	0.994693	0.988632	0.859252	0.999787	0.999997	1
1750	11757	W91307	peroxiredoxin 3	Prdx3	1	0.877955	0.931546	0.913726	1.23637	1.34268	1.3587	1.54764		-1.98764	-1.3179	-1.94217	0.998756	0.999998	0.999998	0.999999
1751		W98230			1	0.837945	0.985431	0.912456	0.947538	0.96377	1.07775	1.16912		0.986122	-1.0162	0.987962	-1.90126	-1.99297	-0.30128	0.969145
1752	12444	W98440	cyclin D2	Ccnd2	1	0.903391	0.82522	0.969731	0.995149	1.08274	1.17333	1.2138		-0.906494	-0.368774	0.123131	-1.07068	0.54003	0.916309	0.397911
1753	18761	W98195	protein kinase C, theta	Prkcq	1	0.905295	0.775086	1.14797	0.802685	0.994087	1.25924	1.1353		0.0821722	0.968309	-0.25164	-0.2029	-1.77652	-0.796506	0.589115
1754	12831	W99856	procollagen, type V, alpha 1	Col5a1	1	0.950028	0.813651	1.00158	1.01843	1.02407	1.42042	1.33804		-1.43466	-1.68813	-1.54489	-0.368774	-2.03601	0.634019	0.8493
1755	13667	AA000219	eukaryotic translation initiation factor 2B, subunit 4 delta	Eif2b4	1	0.937101	0.914449	0.91073	1.04508	1.08907	1.30089	1.22293		0.898512	0.522707	-2.0374	-1.95659	0.842333	0.990437	0.522707
1756	230654	AA000163	RIKEN cDNA D630045E04 gene	D630045E04Rik	1	0.91242	0.836282	1.09684	1.02469	1.08519	1.31503	1.22113		-0.0326139	0.896068	-1.17835	-0.2029	-0.596734	0.998795	0.898512
1757	14533	AA000036	GCN5 general control of amino acid synthesis-like 1 (yeast)	Gcn5l1	1	1.00168	0.85987	0.974518	0.914056	1.19354	1.2405	1.33148		-0.92482	0.865565	-2.01134	-0.2029	0.397911	0.999512	0.999037
1758	20020	AA000244	polymerase (RNA) II (DNA directed) polypeptide A	Polr2a	1	0.856921	0.786703	0.928208	0.91996	1.05413	1.17833	1.33125		0.458177	0.993841	0.988302	-0.723419	-1.83284	0.950529	0.999625
1759	22416	AA000971	wingless-related MMTV integration site 3A	Wnt3a	1	0.806863	1.02624	0.948989	1.00894	1.29492	1.255	1.50952		0.321676	-1.60437	0.387414	-0.403042	0.999558	0.996729	0.998398
1760	14281	AA002910	FBJ osteosarcoma oncogene	Fos	1	0.863544	0.687968	0.933266	0.827649	0.966819	1.16958	1.21705		-1.28355	0.626817	0.983567	-1.68813	0.011363	-1.3179	-1.48279
1761	13360	AA003001	7-dehydrocholesterol reductase	Dhcr7	1	0.934481	0.881825	0.885263	1.12258	1.15287	1.19907	1.37839		-2.02982	-1.26622	-0.92482	0.831365	-1.48279	-1.03439	-1.7014
1762	66963	AA002376	RIKEN cDNA 2310061N19 gene	2310061N19Rik	1	0.783651	0.851719	0.831242	0.960836	1.02196	1.00366	1.10625		0.827566	0.980033	0.706153	0.835092	-1.85366	-1.8637	-1.16055
1763	11747	AA002439	annexin A5	Anxa5	1	1.00978	0.951406	0.892635	1.14813	1.38625	1.61756	1.71109		0.149791	-1.81103	-2.01134	0.980033	0.997669	1	1
1764	14049	AA002292	eyes absent 2 homolog (Drosophila)	Eya2	1	0.864112	0.874323	0.97287	0.956556	0.937083	1.19709	1.29718		0.775995	-0.420298	0.780738	-1.64711	-0.92482	0.868629	0.700114
1765	17865	AA003042	myeloblastosis oncogene-like 2	Mybl2	1	0.905967	0.687219	0.883641	0.954135	0.869204	1.27821	1.17698		-1.57497	0.700114	0.376786	-0.139395	0.94658	0.573227	-1.67465
1766	12035	AA003372	branched chain aminotransferase 1, cytosolic	Bcat1	1	0.875362	0.917378	0.896199	1.28263	0.687811	1.32681	1.06115		-2.03183	-1.05256	-0.123794	-2.03353	-0.25164	0.766251	-1.33492
1767	19342	AA003262	RAB4B, member RAS oncogene family	Rab4b
1768	21828	AA003452	thrombospondin 4	Thbs4	1	0.869039	0.819021	0.887729	1.25203	0.971049	1.07753	1.13369		0.188801	0.937816	-0.472526	0.925969	-1.98201	0.397911	0.011363
1769	22601	AA002763	yes-associated protein	Yap	1	0.805747	0.743688	0.763745	1.03991	1.13447	1.48034	1.38095		0.310258	0.996415	0.955382	-2.02195	0.109607	0.981626	0.99619
1770	12140	AA002514	fatty acid binding protein 7, brain	Fabp7	1	1.02884	0.760722	0.905178	0.982753	0.989941	1.26417	1.16748		-1.49854	0.723678	-0.49008	0.162925	0.238972	-1.33492	0.275211
1771	17524	AA003740	membrane protein, palmitoylated	Mpp1	1	0.88616	0.884955	0.923652	1.35903	1.2249	1.32842	1.17063		-1.36865	0.332962	-1.72731	0.995293	0.961852	0.998716	0.914248
1772	19255	AA003599	protein tyrosine phosphatase, non-receptor type 2	Ptpn2	1	0.858228	0.748599	0.786252	1.07945	1.09992	1.13384	1.16439		-1.82205	0.997107	0.998716	-2.00275	-1.07068	-1.07068	-1.66098
1773	56258	AA003549	heterogeneous nuclear ribonucleoprotein H2	Hnrph2	1	0.838149	0.679316	0.77517	1.08701	1.12168	1.24905	1.42397		-1.10679	0.999966	0.997942	-1.67465	0.448454	0.934618	0.973747
1774	97532	AA007791	RIKEN cDNA C230084J24 gene	C230084J24Rik	1	0.766293	0.723489	0.765292	1.21133	1.10609	1.11559	1.15676		0.9831	0.99995	0.999599	-1.91844	0.712093	-1.24881	0.408278
1775	16818	AA008016	lymphocyte protein tyrosine kinase	Lck	1	0.882945	0.88803	1.00471	1.10828	1.03379	1.12998	1.04134		0.958733	0.831365	0.486584	-1.90126	0.486584	0.495801	0.852683
1776	18214	AA008069	discoidin domain receptor family, member 2	Ddr2	1	0.911296	0.737535	0.827105	1.00686	1.03599	1.39396	1.29458		-2.0275	0.956525	0.983567	-1.36865	0.201541	0.994021	0.893572
1777	15896	AA050972	intercellular adhesion molecule 2	Icam2	1	0.979034	0.884982	1.13268	0.973515	1.11928	1.19074	1.47218		-0.284637	0.251184	-1.17835	-1.96988	0.999772	0.999999	1
1778	19336	AA051083	RAB24, member RAS oncogene family	Rab24	1	0.927723	0.953796	1.01233	0.923755	0.973994	1.15856	1.27016		-1.36865	-1.10679	-1.17835	-1.78825	-1.82205	0.838747	0.966575
1779		AA051014			1	0.958866	0.779261	1.03275	0.93502	0.921058	1.07996	1.1181		0.842333	0.999512	-1.28355	-0.284637	0.865565	0.780738	-1.64711
1780	22241	AA007768	Unc-51 like kinase 1 (C. elegans)	Ulk1	1	0.788044	0.784179	0.861602	0.787035	0.722707	0.753845	0.825814		0.700114	0.756156	-0.0475156	0.927776	0.991732	0.993465	0.845851
1781	12461	AA003927	chaperonin subunit 2 (beta)	Cct2	1	0.914136	0.92746	0.9834	1.00171	1.25881	1.34483	1.67146		-1.36865	0.438603	-2.0275	0.556868	0.99995	1	0.999997
1782	20187	AA004183	receptor-like tyrosine kinase	Ryk	1	0.895513	0.747728	1.07774	1.09903	1.07259	1.16819	1.13511		0.916309	0.94658	0.987614	0.891023	0.745701	-0.741657	0.997669
1783	18515	AA003969	pre B-cell leukemia transcription factor 2	Pbx2	1	0.954259	0.839275	0.94255	0.842376	1.1966	1.27846	1.28368		-2.03492	-1.03439	0.648091	-0.0929338	-0.578814	0.994532	0.973747
1784	11656	AA003951	aminolevulinic acid synthase 2, erythroid	Alas2	1	0.991506	0.827615	1.23732	1.06458	1.17712	1.16224	1.2276		-1.95659	0.700114	0.905544	-1.08876	0.819749	0.868629	0.981109
1785	19411	AA014382	retinoic acid receptor, gamma	Rarg	1	0.894417	0.824996	1.02004	0.95787	1.07891	1.12956	1.07605		-0.83315	0.596884	0.977708	-0.0178328	-1.36865	0.90999	0.90999
1786	12388	AA008582	catenin src	Catns	1	0.964985	0.86194	0.921678	0.935857	1.14302	1.1807	1.31706		-0.0178328	-0.455042	0.985315	-1.98764	0.366027	0.929544	0.999975
1787	18974	AA008627	polymerase (DNA directed), epsilon 2 (p59 subunit)	Pole2	1	0.978907	0.872846	0.993103	0.788024	0.996178	1.12197	1.09782		0.717934	-2.03601	0.984464	-1.67465	-1.94217	-1.77652	0.811632
1788	21645	AI466661	t-complex-associated testis expressed 1	Tcte1	1	0.970231	0.948974	1.03976	0.873089	1.12	1.21409	0.982192		-0.83315	-1.77652	-1.77652	-2.02195	-1.99801	-0.543139	-1.51415
1789	14645	AA011759	glutamate-ammonia ligase (glutamine synthase)	Glul	1	0.870337	1.04351	0.789148	0.909933	1.07853	1.01045	1.02411		0.310258	-2.03353	-0.997968	-1.5296	-1.84338	-1.78825	0.397911
1790	23872	AA014761	E26 avian leukemia oncogene 2, 3' domain	Ets2	1	0.805264	0.842115	0.952734	1.05928	1.06493	1.27506	1.24186		0.999005	0.448454	-1.46689	-0.906494	-1.58976	0.997016	0.999731
1791	55948	AA009229	stratifin	Sfn	1	0.94487	0.796305	0.788825	0.937391	0.91353	1.27117	1.12916		-1.48279	-0.997968	0.998716	-1.73994	0.504894	0.448454	-2.01518
1792	17869	AA009268	myelocytomatosis oncogene	Myc	1	0.767363	0.710941	0.964227	1.02706	1.4134	1.23504	1.49465		0.681388	0.780738	-0.472526	-2.03353	0.947927	0.011363	0.998398
1793	17216	AA011839	minichromosome maintenance deficient 2 mitotin (S. cerevisiae)	Mcm2	1	0.763155	0.739254	1.00581	1.08374	1.22296	1.3492	1.1785		-0.83315	0.712093	0.109607	-0.741657	-1.49854	0.934618	0.428624
1794	20897	AA015434	stimulated by retinoic acid gene 6	Stra6	1	0.880562	0.782707	0.822469	0.944745	0.934061	1.29708	1.24111		0.693974	0.925969	0.999911	0.123131	-1.90126	0.0257757	0.376786
1795	18762	AA014771	protein kinase C, zeta	Prkcz	1	1.17007	0.989416	0.883332	1.06737	1.02289	1.05596	1.03636		-1.66098	-1.14269	-1.78825	-2.01518	-1.92663	-1.81103	-1.08876
1796	14661	AA014196	glutamate dehydrogenase	Glud	1	0.914139	1.01176	0.710645	1.15614	0.920389	0.932759	0.931064		-1.93454	-1.96988	0.996827	-0.83315	-1.45084	0.868629	0.596884
1797	15526	AA014915	heat shock protein, A	Hspa9a	1	0.936824	0.871994	0.75287	1.16095	1.28675	1.45037	1.415		-1.78825	0.958733	0.842333	0.939361	0.999426	0.99988	0.999572
1798		AA014136			1	0.840303	1.00038	0.82238	1.24969	1.29554	1.44849	1.5547		-1.38534	-2.02982	0.842333	0.831365	0.998632	1	1
1799		AA014945			1	0.777563	0.951078	0.90117	0.885633	1.02369	1.13195	1.1082		0.883051	-1.58976	0.999721	-0.186861	-2.02982	-0.284637	0.771167
1800	17896	AA014929	myosin, light polypeptide 4, alkali; atrial, embryonic	Myl4	1	0.882775	0.812309	0.78518	0.95761	0.928565	1.31212	1.14095		-1.45084	0.123131	0.999572	0.775995	-2.01518	0.188801	0.109607
1801	17702	AA016730	homeo box, msh-like 2	Msx2	1	0.730349	0.828741	0.907399	0.902399	0.916145	1.19232	1.20433		0.957642	0.803207	0.397911	0.428624	-1.91844	-0.578814	-0.88816
1802	11804	AA016732	amyloid beta (A4) precursor-like protein 2	Aplp2	1	1.04966	0.952315	0.983853	1.09409	0.977415	1.27336	1.2388		-0.455042	-0.687032	-1.99297	-0.687032	-2.03601	0.893572	0.975803
1803	19173	AA016883	proteasome (prosome, macropain) subunit, beta type 5	Psmb5	1	0.959618	0.901977	0.992699	1.25557	1.36901	1.61309	1.537		-1.38534	0.408278	0.700114	0.999958	0.999895	1	0.999999
1804	19290	AA017896	purine rich element binding protein A	Pura	1	0.941218	0.80675	0.96986	1.09892	0.900187	0.976877	1.06971		0.0682628	0.993268	-1.38534	-1.87348	-0.614704	-1.89226	-1.07068
1805	75008	AA017881			1	0.904074	0.785871	0.811828	0.821436	1.09844	1.19902	1.39714		0.0542265	0.999067	-1.08876	0.994849	0.376786	0.706153	0.97445
1806	22271	AA020155	uridine phosphorylase 1	Upp1	1	0.878694	0.759703	0.963118	1.10504	1.02015	1.16631	1.19253		0.985724	0.999813	0.871631	0.612078	-0.507702	0.958733	0.94658
1807	19352	AA020526	RAB geranylgeranyl transferase, b subunit	Rabggtb	1	0.918288	0.840735	0.8516	0.884787	1.21506	1.26771	1.52835		-0.420298	0.965676	0.954211	0.0400638	0.973747	0.99993	1
1808	232932	AI508261	similar to pregnancy-specific glycoprotein 23	na	1	0.944637	0.787042	0.926134	1.12595	0.900274	0.963626	1.03414		0.548509	0.999346	0.99752	-0.525389	-0.062537	-2.01518	-0.186861
1809	16453	AA023670	Janus kinase 3	Jak3	1	0.999672	0.960775	0.826064	0.965718	1.12105	1.07412	1.47289		0.175929	-2.03183	0.596884	-1.61881	-1.24881	0.874574	0.999586
1810		AA022290			1	0.710331	0.774602	0.936326	1.21345	1.09744	1.02365	1.1073		0.97445	0.998905	0.999807	-1.94952	-0.284637	-1.51415	0.761248
1811	18132	AA022302	Notch gene homolog 4 (Drosophila)	Notch4	1	0.905681	0.816862	0.965148	0.979176	1.06409	1.20038	1.14166		0.984464	0.626817	0.9957	-1.23132	-0.778204	0.997877	0.999572
1812	13430	AA021681	dynamin 2	Dnm2	1	0.877984	0.865181	1.0957	1.0615	1.00943	0.998212	1.09202		0.803207	0.939361	0.999721	0.780738	-1.26622	0.53143	-0.062537
1813	20922	AA021916	suppressor of Ty 4 homolog (S. cerevisiae)	Supt4h	1	0.798406	0.888709	0.912551	1.04773	1.04098	1.26297	1.15456		0.999884	0.972289	0.661729	-1.19608	-2.03678	0.999954	0.997442
1814	14884	AA024318	general transcription factor II H, polypeptide 1	Gtf2h1	1	0.896073	0.729141	0.906423	1.09844	1.01384	1.16965	1.18356		0.162925	0.999928	-0.334847	-1.98201	-1.05256	0.950529	0.838747
1815	12916	AA030254	cAMP responsive element modulator	Crem	1	0.900349	0.940777	0.860951	1.26569	1.10751	1.18241	1.1561		-0.455042	-0.75992	0.955382	0.957642	0.495801	0.990977	0.942348
1816	12464	AA027583	chaperonin subunit 4 (delta)	Cct4	1	0.890441	0.857227	0.823447	1.18585	0.988989	1.06068	0.909583		-0.318018	0.556868	0.975803	-0.403042	-1.95659	-1.33492	-0.723419
1817	11821	AA030540	adenine phosphoribosyl transferase	Aprt	1	0.730069	0.918383	0.916716	1.41489	1.73185	1.6221	1.73412		0.999949	-0.0475156	-1.83284	0.999721	1	1	1
1818	15492	AA028760	hydroxysteroid dehydrogenase-1, delta<5>-3-beta	Hsd3b1	1	1.04244	0.988931	0.825548	0.946626	0.855633	0.855251	1.03861		0.959797	-0.92482	-1.38534	-1.0162	0.931273	0.996627	0.999905
1819	381596	AA027522	LOC381596	na	1	0.782358	0.809262	0.862073	1.22826	1.00223	0.940137	0.768621		0.856	0.937816	0.977089	-2.03353	-1.41835	0.226627	0.789972
1820	17256	AA028786	male enhanced antigen 1	Mea1	1	1.08973	1.08565	0.962569	1.08514	1.09645	1.08516	1.09771		0.0400638	-0.25164	-1.46689	-0.062537	0.162925	-0.0178328	0.188801
1821	12960	AA028309	crystallin, beta B1	Crybb1	1	0.901074	0.746776	0.947786	0.984422	0.997437	1.26905	1.33306		-1.46689	0.996415	0.987614	-1.96988	-0.906494	0.729326	0.999528
1822		AA028475			1	0.898524	0.992404	0.80125	1.05773	1.06037	1.05831	1.11024		-1.57497	-0.0929338	0.991487	-2.03183	-1.81103	-1.99801	-0.66889
1823	15360	AA030116	3-hydroxy-3-methylglutaryl-Coenzyme A synthase 2	Hmgcs2	1	0.848628	0.980506	0.742441	0.906796	0.747706	0.994636	0.746538		-1.05256	-1.99297	0.999231	0.771167	0.999692	0.162925	0.999984
1824	20598	AA028477	sphingomyelin phosphodiesterase 2, neutral	Smpd2	1	0.834307	0.851551	0.73527	1.00538	1.0192	1.11546	1.14063		-1.49854	0.896068	0.998184	-2.03601	-1.883	-1.99297	0.226627
1825	19132	AA030447	peripherin 1	Prph1	1	0.922573	0.760855	0.907496	1.12038	1.11788	0.986516	0.885474		0.931273	0.940871	0.794464	-0.614704	-0.123794	-2.03353	-1.03439
1826	16002	AA030546	insulin-like growth factor 2	Igf2	1	0.899169	0.861132	1.07997	1.21046	0.939367	0.85929	0.719099		0.979474	0.780738	0.355137	-1.33492	-0.596734	-1.28355	0.428624
1827	14272	AA032725	farnesyltransferase, CAAX box, alpha	Fnta	1	0.935255	0.805313	0.835347	0.836891	1.15891	1.2971	1.41064		0.898512	0.992427	0.310258	0.815729	0.458177	0.997596	1
1828	17096	AA032394	Yamaguchi sarcoma viral (v-yes-1) oncogene homolog	Lyn	1	0.888861	0.786779	0.986761	1.05348	0.990093	1.12053	0.94701		0.998756	0.999997	0.97445	-1.92663	-0.403042	0.994849	-1.98764
1829	11740	AA033138	solute carrier family 25 (mitochondrial carrier; adenine nucleotide translocator), member 5	Slc25a5	1	1.03373	0.921442	0.785546	0.947822	1.08198	1.22155	1.08137		-1.99297	-1.40191	-0.92482	-1.8637	-1.64711	0.376786	-1.78825
1830	20866	AA032834	stromal interaction molecule 1	Stim1	1	0.881159	0.874544	0.93885	1.08524	1.00656	1.10281	0.91697		0.929544	0.90325	0.798876	-1.16055	-2.03725	0.729326	-2.03353
1831	14050	AA033245	eyes absent 3 homolog (Drosophila)	Eya3	1	1.12348	0.798233	0.948098	0.950503	1.02986	1.28627	1.09034		-1.96338	0.918327	-0.66889	-1.64711	0.287026	0.999279	0.775995
1832	13680	AA033377	DEAD (Asp-Glu-Ala-Asp) box polypeptide 19	Ddx19	1	0.979095	0.959768	0.916655	1.1946	1.09495	1.28942	1.0545		-1.73994	-2.01134	0.756156	0.984895	0.717934	0.99887	-0.0776768
1833	54130	AA034697	ARP1 actin-related protein 1 homolog A (yeast)	Actr1a	1	1.03585	0.849315	0.981852	1.0649	0.974264	1.30824	1.25684		-2.02982	0.831365	-1.54489	0.589115	-2.02195	0.951785	0.815729
1834	20183	AA033489	retinoid X receptor gamma	Rxrg	1	1.08537	0.942714	0.927014	1.20905	1.12549	1.26056	1.23046		0.723678	-1.91844	0.785397	0.998795	0.766251	0.99887	0.999964
1835	17907	AA032362	myosin light chain, phosphorylatable, fast skeletal muscle	Mylpf	1	0.947205	0.926027	0.758622	1.03006	0.953742	1.01259	0.788663		0.175929	-1.83284	0.740336	-2.00275	-1.73994	-1.97609	-2.01134
1836	11545	AA032357	ADP-ribosyltransferase (NAD+; poly (ADP-ribose) polymerase) 1	Adprt1	1	1.24719	1.16407	0.972274	0.959806	1.12321	1.07672	1.059		-0.403042	-1.78825	0.827566	0.67494	-1.10679	0.877457	0.960837
1837		AA030995			1	0.770344	0.869652	0.593031	0.870387	0.756849	0.929285	0.993194		0.99887	0.939361	0.999255	0.998294	0.995001	0.990437	0.999807
1838	12850	AA030846	demethyl-Q 7	Coq7	1	0.869612	0.809114	0.927219	1.10345	1.27015	1.49538	1.38219		0.811632	0.992859	0.994849	0.723678	1	1	1
1839	11423	AA030863	acetylcholinesterase	Ache	1	0.94784	0.805217	0.88964	0.966537	1.06634	1.13112	1.02822		0.589115	-1.68813	0.999891	-1.66098	-1.35184	0.811632	-0.123794
1840	17128	AA030901	MAD homolog 4 (Drosophila)	Madh4	1	0.90349	0.857891	0.859753	1.0904	1.09862	1.09006	1.23057		0.556868	0.971532	0.999973	0.0400638	0.922231	0.998005	0.999935
1841	19228	AA034782	parathyroid hormone receptor 1	Pthr1	1	0.990568	0.937356	0.934882	1.012	0.86321	1.07782	0.909953		-1.38534	-1.97609	0.998716	-0.614704	0.94658	0.226627	0.21415
1842	12832	AA034564	procollagen, type V, alpha 2	Col5a2	1	0.861327	0.800094	0.901224	1.10835	1.0193	1.07785	1.02498		0.953012	0.999979	0.999985	-0.614704	0.991732	0.981626	-1.48279
1843	14156	AA034561	flap structure specific endonuclease 1	Fen1	1	0.945562	0.869599	0.95569	1.01201	0.9686	1.05648	0.970639		-2.0275	-1.03439	0.975135	-0.123794	-0.123794	-0.814822	-1.98764
1844	19652	AA034857	RNA binding motif protein 3	Rbm3	1	0.926154	0.730305	0.871279	1.17261	1.2664	1.33043	1.38666		0.596884	0.998588	0.745701	0.927776	0.999991	0.999988	1
1845	13016	AA036604	C-terminal binding protein 1	Ctbp1	1	0.931647	1.24489	0.882675	1.20128	1.22638	1.41724	1.14247		-2.01518	-2.00275	-1.61881	0.988954	0.996627	0.999972	1
1846	103988	AA014441	glucokinase	Gck	1	1.03623	0.911482	0.862966	0.920314	0.841373	0.708948	0.522927		-1.75236	-1.19608	-0.0178328	-1.3179	-0.17093	0.865565	0.999125
1847	14254	AA014250	FMS-like tyrosine kinase 1	Flt1	1	0.966648	0.843482	1.00072	0.999818	1.03781	1.05162	1.12215		-1.90126	-1.77652	0.175929	-1.92663	-0.578814	-0.70521	0.275211
1848	53331	AA014394	syntaxin 7	Stx7	1	1.01338	0.834048	1.00837	1.06619	0.938187	0.925868	0.97875		-1.5296	0.835092	0.987614	-1.76455	-1.14269	-1.97609	-0.235291
1849	12534	AA035888	cell division cycle 2 homolog A (S. pombe)	Cdc2a	1	0.890416	0.784396	0.93492	0.838439	1.14326	1.30731	1.41552		0.387414	0.815729	-1.99297	0.418516	0.123131	0.877457	0.998973
1850	14460	AA036275	GATA binding protein 1	Gata1	1	1.05877	0.887958	0.851868	0.857422	1.04975	1.19068	1.19601		-0.334847	0.251184	0.999794	-1.66098	-1.84338	0.965676	0.896068
1851	22057	AA036170	transducer of ErbB-2.1	Tob1	1	0.76113	0.695149	0.582345	0.663013	0.759202	0.756868	0.842211		0.997442	0.999346	0.99988	0.999231	0.999671	0.998066	0.951785
1852	18391	AA036319	opioid receptor, sigma 1	Oprs1	1	0.993325	1.10605	1.06221	1.65364	1.14977	1.39959	1.23371		0.734878	0.0682628	-1.35184	1	0.918327	1	0.999096
1853		AA038087			1	0.993597	0.928646	0.872941	0.931389	1.18013	1.21748	1.00744		-2.0275	0.332962	-0.17093	-1.03439	0.780738	0.994693	-1.96988
1854	66684	AA038416	RIKEN cDNA 3930402F23 gene	3930402F23Rik	1	1.00168	0.914798	0.93336	1.50535	1.20508	1.36543	1.34861		-0.543139	0.723678	-1.99297	1	0.999862	1	0.999999
1855	18563	AA038254	pyruvate carboxylase	Pcx	1	0.977514	1.16668	1.05823	0.945976	0.78687	0.917864	0.811099		-1.93454	-0.403042	-0.650785	-0.284637	0.831365	-1.21374	0.985724
1856	13090	AA038397	cytochrome P450, family 2, subfamily b, polypeptide 19	Cyp2b19	1	1.06636	0.919209	0.904479	0.814331	1.02023	1.29102	0.95144		-1.97609	-0.472526	-0.25164	-2.03725	-1.61881	-1.71446	-0.578814
1857	20855	AA038788	stanniocalcin 1	Stc1	1	0.940933	0.838077	0.793624	1.25998	1.00852	1.01882	0.95212		-1.23132	0.648091	0.990977	-1.89226	-2.02488	-1.91844	-1.72731
1858	18797	AA041709	phospholipase C, beta 3	Plcb3	1	1.0598	0.900037	0.899695	1.07373	0.925891	1.03476	1.03759		-0.268089	-1.28355	0.745701	-0.284637	-0.0475156	-1.94217	-1.17835
1859	13000	AA041970	casein kinase II, alpha 2, polypeptide	Csnk2a2	1	1.0873	0.998577	0.90226	0.971178	1.17264	1.13478	1.14224		-1.48279	0.418516	-0.578814	0.693974	0.0682628	0.943791	0.993067
1860	13870	AA041710	excision repair cross-complementing rodent repair deficiency, complementation group 1	Ercc1	1	0.877824	0.94972	0.884946	1.07108	1.05743	1.07372	1.12862		-1.46689	-2.03601	0.756156	0.885763	-1.56002	-1.5296	0.984895
1861		AA050086			1	0.827101	0.926226	0.867819	0.986796	1.11185	1.08846	1.12029		0.972289	0.522707	0.997362	-2.0374	0.226627	-0.997968	0.654964
1862	12386	AA049813	catenin alpha 2	Catna2	1	0.869338	0.829166	0.848831	0.949485	1.10412	1.22746	1.36337		0.418516	-0.284637	0.868629	-1.79976	0.706153	0.9831	0.900906
1863	16897	AA050402	lethal giant larvae homolog	Llglh
1864	19401	AA049907	retinoic acid receptor, alpha	Rara	1	0.834483	0.907397	0.914518	1.16928	0.974764	0.958599	0.999219		0.123131	0.428624	0.999512	-0.268089	-1.77652	-1.33492	-2.0374
1865	21405	AA049898	transcription factor 1	Tcf1	1	0.997088	0.926186	0.793313	1.25914	1.13753	1.24048	1.41654		0.992427	0.905544	0.891023	0.999999	0.999976	1	1
1866	20182	AA050298	retinoid X receptor beta	Rxrb	1	0.821388	0.854223	0.794637	1.02077	0.98249	1.2095	1.15916		0.896068	0.661729	0.99752	-1.93454	-2.0275	0.789972	0.838747
1867		AA050300			1	1.01874	1.08424	0.863491	1.40021	1.31237	1.52815	1.17172		-1.78825	-1.83284	-0.578814	0.99781	0.984895	1	0.999954
1868		AA050765			1	1.10365	0.926018	1.10354	1.06058	0.956917	0.946299	0.960491		0.467772	0.668387	0.668387	-0.472526	0.0400638	0.745701	0.967453
1869	18933	AA050726	paired related homeobox 1	Prrx1	1	1.26384			1.29928	1.7924		1.11034
1870	15463	AA049862	HIV-1 Rev binding protein	Hrb	1	1.00671	0.861765	0.946399	1.06409	0.97675	1.22145	1.20134		-0.284637	0.458177	0.905544	0.914248	-1.78825	0.998939	0.997942
1871	20463	AA050684	cytochrome c oxidase subunit VIIa polypeptide 2-like	Cox7a2l	1	0.828279	0.937593	0.900553	1.04065	1.05864	0.951556	0.954393		0.964754	-1.24881	0.835092	-0.75992	-1.85366	0.011363	-2.0072
1872	52477	AA050900	DNA segment, Chr 1, ERATO Doi 396, expressed	D1Ertd396e	1	0.901565	0.966582	0.912762	1.03717	1.0748	1.02914	1.18364		-0.687032	0.573227	0.999037	-1.48279	0.332962	0.993465	0.999988
1873	19763	AA050496	ring finger protein 1	Ring1	1	1.01236	0.820129	0.907728	0.866753	1.15519	1.29611	1.20687		-1.0162	0.999279	-2.01518	-1.43466	0.988632	0.999837	0.972289
1874	14450	AA050540	phosphoribosylglycinamide formyltransferase	Gart	1	0.875233	0.85073	1.02066	1.08505	1.07914	1.26355	1.22216		0.712093	0.991732	0.275211	0.745701	0.565107	0.999911	0.99999
1875		AA050328		ESTs	1	0.994343	0.77084	0.926326	0.925331	0.877382	1.07679	1.05809		-0.543139	0.995828	0.845851	0.626817	-0.507702	-0.062537	0.0682628
1876	51812	AA048134	microspherule protein 1	Mcrs1	1	0.909281	0.940579	0.986365	1.06207	1.06069	1.17461	1.03732		0.996073	0.0821722	0.981109	0.298708	-1.76455	0.999985	0.90325
1877	20926	AA048444	suppressor of Ty 6 homolog (S. cerevisiae)	Supt6h	1	0.936513	0.842397	1.09167	0.871794	1.02976	1.00932	1.20479		-0.961433	0.99752	-0.368774	0.467772	0.504894	0.011363	0.604538
1878	23834	AA048426	cell division cycle 6 homolog (S. cerevisiae)	Cdc6	1	1.00727	1.00415	0.92531	1.20687	1.14745	1.22527	0.987457		0.931273	-0.614704	-2.01134	0.999826	0.9957	0.999996	0.907791
1879	50708	AA049416	histone 1, H1c	Hist1h1c	1	1.38709	0.85791	0.968548	1.12645	0.799384	1.26388	0.877714		0.996415	0.397911	-1.3179	-0.0178328	0.924121	0.891023	-0.139395
1880	21945	AA049467	death effector domain-containing	Dedd	1	0.969343	0.900037	1.03487	0.929498	0.937201	1.04026	1.00745		0.771167	0.999206	0.995293	-1.68813	-0.814822	0.939361	-1.99297
1881	16907	AA049647	lamin B2	Lmnb2	1	0.994904	0.905402	0.933814	1.08064	1.05045	1.45003	1.00756		-1.28355	-1.3179	-0.66889	-0.796506	-1.0162	0.975803	0.477241
1882	21750	AA049607	telomeric repeat binding factor 2	Terf2	1	1.10202	1.00677	0.916068	0.922218	1.05405	1.04828	1.0588		-0.632722	-1.94217	0.8493	0.238972	-1.95659	-1.84338	0.823695
1883	19242	AA049699	pleiotrophin	Ptn	1	0.989463	0.832843	0.853957	0.964977	1.02485	1.27479	1.2137		-0.30128	-0.614704	0.993655	0.418516	-1.73994	-1.90998	0.201541
1884		AA049744			1	1.13249	0.839888	0.932003	1.01303	1.0895	0.985551	1.09771		-0.420298	-0.687032	0.226627	0.823695	-0.0929338	-1.14269	-0.351767
1885	18626	AA051328	period homolog 1 (Drosophila)	Per1	1	0.835483	0.816262	0.917804	1.23013	0.8529	0.854904	0.799511		0.905544	0.823695	0.972289	-2.02488	-2.03725	0.458177	0.668387
1886	12048	AA051441	Bcl2-like	Bcl2l	1	0.840241	0.828658	0.920798	1.11469	0.985217	0.915358	0.852148		0.943791	0.977708	0.999973	-1.67465	-1.61881	0.634019	0.977708
1887	20535	AA048952	solute carrier family 4 (anion exchanger), member 2	Slc4a2	1	0.836034	0.872647	0.912823	1.03799	1.11012	1.09726	0.945779		0.9789	0.999302	0.999945	-1.66098	0.681388	0.9831	-1.63305
1888	16776	AA049251	laminin, alpha 5	Lama5	1	0.846276	0.830513	0.874418	0.975367	1.0267	1.35465	1.23895		0.740336	-0.869822	0.991732	-0.66889	-0.235291	0.993268	0.997942
1889	20220	AA049308	Sin3-associated polypeptide 18	Sap18	1	0.839446	0.910546	0.843316	1.20006	1.13728	1.22301	1.18376		0.999905	0.950529	0.999898	0.998543	0.999898	0.999999	0.999995
1890	21846	AA049318	tyrosine kinase receptor 1	Tie1	1	0.828784	0.810845	0.91742	1.20741	1.00906	1.11809	1.0813		0.995952	0.997194	0.999794	0.907791	0.556868	0.905544	0.970756
1891	13079	AA058085	cytochrome P450, family 21, subfamily a, polypeptide 1	Cyp21a1	1	0.916507	0.878268	0.981167	1.21797	0.942093	0.820043	0.804508		-0.368774	0.654964	0.916309	-1.98764	-1.90126	-1.68813	0.0542265
1892	17420	AA058165	menage a trois 1	Mnat1	1	1.07361	0.907709	0.833954	1.04242	0.992222	1.21542	1.08049		0.880283	0.344115	0.999969	0.251184	-2.01518	0.995952	0.90999
1893	11826	AA064011	aquaporin 1	Aqp1	1	0.84791	1.34538	0.815809	1.24939	1.17835	1.60337	1.45839		-1.72731	-0.723419	0.978312	0.996523	0.972289	1	1
1894	18102	AA058113	expressed in non-metastatic cells 1, protein	Nme1	1	1.11767	1.05647	1.01252	1.41013	1.1608	1.27265	1.36328		-1.07068	-1.66098	-1.43466	1	0.999993	1	1
1895	12835	AA059524	procollagen, type VI, alpha 3	Col6a3	1	1.01	0.956311	0.978341	1.02148	1.00399	1.07535	1.17263		-1.0162	-0.92482	0.604538	0.67494	-1.57497	-1.97609	0.729326
1896	12041	AA059497	branched chain ketoacid dehydrogenase kinase	Bckdk	1	0.903276	0.974024	0.979255	1.01984	1.05555	1.15662	1.08633		-1.30077	0.596884	0.960837	-1.40191	-0.318018	0.999983	0.997942
1897	20893	AA064241	basic helix-loop-helix domain containing, class B2	Bhlhb2	1	0.764406	0.721789	0.669809	0.785107	0.85762	0.860439	0.946929		0.955382	0.922231	0.86244	0.949243	0.706153	0.775995	0.573227
1898	17196	AA059540	myelin basic protein	Mbp	1	0.968969	0.820144	0.908219	0.961839	0.960473	1.06626	1.13648		-0.403042	0.53143	0.891023	-1.83284	-1.89226	-0.062537	-0.219044
1899	17939	AA060459	N-acetyl galactosaminidase, alpha	Naga	1	0.870024	0.904024	1.03463	0.91949	1.1317	1.11447	1.05271		0.989571	0.0682628	0.175929	0.310258	0.794464	0.907791	0.929544
1900	14718	AA060494	glutamate oxaloacetate transaminase 1, soluble	Got1	1	0.760991	0.830022	0.795018	0.98476	0.795806	0.787763	0.785006		0.999807	0.988954	0.998005	0.448454	0.995828	1	1
1901	12839	AA060364	procollagen, type IX, alpha 1	Col9a1	1	1.19577	0.983114	0.98476	0.763585	0.997975	1.0987	0.914581		-0.49008	-1.54489	0.495801	-1.36865	-1.14269	-0.723419	-1.49854
1902	17187	AA060226	Max protein	Max	1	0.831748	0.740113	0.823301	0.83717	0.921018	1.11067	1.18247		0.999739	0.999887	0.998398	-1.77652	-1.36865	-1.87348	-1.90998
1903	13119	AA060595	cytochrome P450, family 4, subfamily a, polypeptide 14	Cyp4a14	1	0.940804	0.903164	0.770644	0.740237	0.938545	0.909364	0.778453		-1.51415	-0.385866	0.957642	0.995828	-0.75992	0.109607	0.995828
1904	20818	AA059893	signal recognition particle receptor, B subunit	Srprb	1	0.858251	0.888033	0.959293	1.21046	0.992235	1.23419	0.957062		0.556868	0.959797	-0.155107	0.971532	-2.02982	0.984021	-0.83315
1905	14567	AA060905	guanosine diphosphate (GDP) dissociation inhibitor 1	Gdi1	1	1.06954	0.878762	0.911093	0.971111	1.02043	1.18821	1.08207		-0.92482	0.931273	0.355137	-0.997968	-2.03353	0.99824	-1.57497
1906		AA060906			1	1.02845	1.01465	0.976179	1.36824	1.18064	1.17678	1.03101		0.761248	-1.41835	-1.49854	0.999925	0.700114	0.999231	0.989267
1907	11287	AA061055	pregnancy zone protein	Pzp	1	1.17174	0.972588	0.994877	1.03091	0.921922	1.10531	0.886577		0.989267	0.90999	-1.95659	-0.472526	-0.906494	0.548509	-1.0162
1908		AA061838			1	0.949125	0.794499	0.997536	0.959358	1.08607	0.963781	1.0289		0.965676	-0.284637	-0.155107	-0.796506	-0.123794	-1.98201	-1.64711
1909	16426	AA062129	inter-alpha trypsin inhibitor, heavy chain 3	Itih3	1	0.838752	1.06304	0.754709	0.979234	0.934624	0.968957	1.0295		0.984464	-1.51415	0.999923	-2.01872	-0.507702	-1.98764	-1.99297
1910	22229	AA062091	uncoupling protein 3, mitochondrial	Ucp3	1	0.900149	0.848845	0.863527	0.904428	0.995786	1.07972	1.21195		0.344115	0.949243	0.98651	-1.66098	-0.687032	-1.45084	0.981109
1911	11364	AA061679	acetyl-Coenzyme A dehydrogenase, medium chain	Acadm	1	0.789818	0.739385	0.79303	1.15518	0.946693	1.02467	0.991559		0.883051	1	0.999999	-1.99801	-1.07068	-1.08876	-0.943134
1912	18479	AA061378	p21 (CDKN1A)-activated kinase 1	Pak1	1	0.872551	0.802278	0.898956	0.940838	1.0339	1.143	1.14855		0.998939	0.975135	0.999702	0.428624	-0.961433	0.448454	0.448454
1913	19660	AA061550	retinol binding protein 2, cellular	Rbp2	1	0.921633	0.800295	0.885954	1.05268	1.00183	1.18614	1.15774		0.966575	0.964754	0.998398	0.90999	0.188801	0.998448	0.961852
1914	22318	AA061343	vesicle-associated membrane protein 2	Vamp2	1	0.881117	0.847323	0.854404	0.98436	1.01133	1.13233	1.0869		0.98651	0.999772	0.999996	-1.56002	-2.02982	0.958733	0.991732
1915	17131	AA061644	MAD homolog 7 (Drosophila)	Madh7	1	0.92834	0.989597	0.722159	1.14919	0.864847	1.01346	0.961603		0.803207	-0.596734	0.96996	-1.54489	0.999847	0.687732	0.955382
1916	13805	AA080278	endoglin	Eng	1	0.994829	0.933229	0.808336	1.08905	0.973098	1.19654	1.19334		-1.61881	-1.8637	-1.16055	0.604538	-1.5296	-0.062537	-1.14269
1917	12748	AA097860	CDC-like kinase 2	Clk2	1	1.00749	0.918491	0.640923	1.02193	0.951034	0.957039	1.15145		0.332962	-0.596734	0.999971	-1.76455	0.109607	-0.88816	-2.00275
1918	12153	AA097223	bone morphogenetic protein 1	Bmp1	1	0.998639	0.953448	0.866654	1.03731	0.842888	0.942583	0.864143		-1.05256	-1.76455	0.999153	-1.92663	0.996304	-0.062537	0.865565
1919	18654	AA098166	placental growth factor	Pgf	1	0.991823	0.974938	0.820823	0.970086	1.00269	0.969539	1.08207		0.438603	-1.24881	0.989267	-1.93454	-0.139395	-1.89226	-0.123794
1920	17762	AI427767	microtubule-associated protein tau	Mapt	1	0.997524	0.977243	0.794533	0.839196	0.943863	1.12461	1.25618		-1.76455	0.989868	0.98651	0.898512	-1.36865	0.987614	0.990711
1921		AA061388			1	0.939574	0.895511	0.945158	1.0392	1.08815	1.27805	1.18338		-1.79976	0.981626	-0.186861	-0.543139	0.999599	0.999994	0.999917
1922	26369	AA061546	centrin 1	Cetn1	1	0.839844	0.844923	0.933112	1.09133	0.98921	1.14813	1.18995		0.0959538	0.99992	-1.21374	-0.796506	0.438603	0.885763	0.999779
1923	18598	AA061521	pyruvate dehydrogenase E1 alpha 2	Pdha2	1	0.964775	0.873683	0.981688	0.956299	0.996239	1.04654	1.07111		0.789972	0.998005	-1.7014	-1.94217	-0.155107	-0.687032	-1.73994
1924	21756	AA063894	testicular serine protease 2	Tesp2	1	0.913293	0.823101	1.02205	1.01363	1.03044	1.0731	1.1306		0.011363	0.999125	0.504894	-0.814822	0.717934	0.275211	0.966575
1925	15504	AA061150	DnaJ (Hsp40) homolog, subfamily B, member 3	Dnajb3	1	1.00904	1.05311	1.00174	1.00493	1.07758	1.01985	1.09904		-2.02488	-0.49008	0.64111	-0.49008	0.136526	-1.21374	-2.03353
1926	11451	AA065536	acrosomal vesicle protein 1	Acrv1	1	0.918287	0.873325	0.747263	1.21427	0.910287	0.954749	1.08647		-1.64711	0.998795	0.9957	0.842333	-1.03439	-1.33492	0.798876
1927	11910	AA062231	activating transcription factor 3	Atf3	1	0.915866	0.921026	0.912169	0.946858	1.01206	1.08197	1.07094		0.011363	0.966575	-1.56002	-0.455042	-0.186861	-1.76455	-2.0072
1928	21461	AA118406	t-complex protein 10b	Tcp10b	1	1.13521	1.09475	0.840414	0.872858	1.02079	0.989702	1.00271		-0.83315	-1.58976	-1.03439	-1.82205	-0.632722	-1.96338	0.596884
1929	19821	AA089102	ring finger protein 2	Rnf2	1	0.818312	0.831298	1.03499	1.03194	1.05693	1.13132	1.06124		0.998496	0.998448	0.789972	0.723678	0.998543	0.975135	0.995001
1930	16833	AA110449	lactate dehydrogenase 3, C chain, sperm specific	Ldh3	1	0.880323	0.828625	0.728805	1.0036	0.878354	1.22704	1.22849		0.654964	0.999586	0.925969	-1.49854	-0.778204	-0.139395	0.522707
1931	18459	AA108977	poly A binding protein, cytoplasmic 2	Pabpc2	1	0.840181	0.934516	0.803797	1.09654	0.951202	1.20788	1.22164		0.976454	0.21415	0.998833	0.467772	-2.01134	0.999599	0.992859
1932	13137	AI326546	decay accelerating factor 2	Daf2	1	0.923939	1.01792	0.92156	1.04595	1.19586	1.14721	1.18426		0.438603	-1.91844	0.827566	-0.796506	0.803207	0.136526	0.999831
1933	11495	AA108219	a disintegrin and metalloprotease domain 2	Adam2	1	1.21219	1.39979	1.88739	1.98093	1.98183	1.97998	1.98474		0.819749	0.998756	1	1	1	1	1
1934	18981	AA066640			1	1.02602	0.862749	0.902961	1.0033	0.944791	1.13163	1.14367		-1.72731	0.976454	-0.219044	-1.83284	0.201541	0.929544	0.717934
1935	12321	AA067258	calumenin	Calu	1	0.921471	0.849924	0.794434	0.970411	0.984827	1.11217	1.06614		-1.96338	0.990711	0.975803	-1.99297	-0.88816	-0.139395	-0.2029
1936	17977	AA097341	nuclear receptor coactivator 1	Ncoa1	1	0.909726	0.975993	0.95221	1.05594	0.955992	1.05185	1.09318		-0.778204	-0.437632	0.21415	-0.368774	-0.578814	-1.35184	0.8493
1937	17246	AA072086	transformed mouse 3T3 cell double minute 2	Mdm2	1	0.77398	0.700924	0.736096	0.876886	1.09835	1.26841	1.24934		0.984895	1	0.999993	0.993465	-1.73994	0.922231	0.999826
1938	22235	AA067191	UDP-glucose dehydrogenase	Ugdh	1	1.08772	0.947884	1.06779	1.73448	1.96465	2.174	2.32678		0.740336	-0.979712	0.953012	1	1	1	1
1939	16905	AA066180	lamin A	Lmna	1	0.876569	0.830172	0.95773	1.52268	1.37412	1.64208	1.74373		0.0959538	0.589115	-1.10679	1	0.999999	1	1
1940	22129	AA065714	tetratricopeptide repeat domain 3	Ttc3	1	0.973062	0.943498	0.869173	1.18086	1.1877	1.23171	1.27161		-1.56002	0.877457	0.123131	0.999444	0.999996	0.999993	1
1941	12013	AA088927	BTB and CNC homology 1	Bach1	1	0.801321	0.769834	0.821418	1.01842	1.09317	1.0475	1.02285		0.999989	0.999954	0.999995	-1.83284	0.845851	-1.87348	0.376786
1942	20619	AA088934	synaptosomal-associated protein 23	Snap23	1	0.976373	0.89538	0.841524	1.06975	1.10566	1.10736	1.04839		-1.91844	0.981109	0.980033	0.634019	0.766251	0.700114	-1.96988
1943	15254	AA068901	histidine triad nucleotide binding protein	Hint	1	0.913284	0.954019	0.750214	1.19689	1.09939	1.25682	1.24182		-0.49008	-1.56002	0.918327	0.90999	0.756156	0.852683	0.448454
1944	20315	AA068750	chemokine (C-X-C motif) ligand 12	Cxcl12	1	0.914758	0.969819	0.778211	0.902039	0.848278	0.793848	0.760046		0.344115	-1.64711	0.998496	0.924121	0.993067	0.999993	1
1945	20302	AA071899	chemokine (C-C motif) ligand 3	Ccl3	1	0.952179	0.894241	1.00458	0.881839	0.998007	1.08474	1.14391		-1.26622	0.997596	0.376786	-0.70521	-1.51415	0.937816	0.991487
1946	12842	AA073604	procollagen, type I, alpha 1	Col1a1	1	0.877594	0.851466	1.02337	1.05914	0.90064	1.00538	1.01669		-1.21374	0.619504	-0.30128	-1.7014	-1.30077	-1.30077	-1.94952
1947	22627	AA080011	tyrosine 3-monooxygenase/tryptophan 5-monooxygenase activation protein, epsilon polypeptide	Ywhae	1	0.983707	0.97793	1.03022	1.22775	1.02821	1.23567	1.12217		-1.57497	-0.235291	-0.741657	0.999367	0.397911	0.999995	0.287026
1948	27226	AA073963	phospholipase A2, group VII (platelet-activating factor acetylhydrolase, plasma)	Pla2g7	1	1.06761	0.794874	1.02866	0.913455	0.835077	1.09348	0.904074		-1.63305	0.969145	-0.455042	-1.33492	0.96381	-0.268089	-1.96988
1949	12362	AA098139	caspase 1	Casp1	1	1.0983	0.896991	1.00278	0.934433	1.01944	1.2124	1.07812		0.0959538	-1.81103	0.355137	-1.67465	-1.84338	0.842333	0.842333
1950	11798	AA097958	baculoviral IAP repeat-containing 4	Birc4	1	1.0037	0.691682	0.785837	0.873934	0.952659	1.03291	0.86831		0.251184	0.999984	0.998905	0.251184	0.914248	0.477241	0.734878
1951	13117	AA097980	cytochrome P450, family 4, subfamily a, polypeptide 10	Cyp4a10	1	0.981832	0.946808	0.661246	0.597584	0.926943	0.976014	0.99342		-1.82205	-1.35184	0.995568	0.999998	-0.525389	-0.906494	-0.741657
1952	17756	AA125125	microtubule-associated protein 2	Mtap2	1	0.971573	1.07824	1.00287	1.0311	1.13065	1.24058	1.44291		-1.78825	0.687732	-1.57497	0.999937	1	1	1
1953	15369	AA183852	heme oxygenase (decycling) 2	Hmox2	1	0.870237	1.01267	1.00458	0.887149	1.10291	1.19176	1.10924		0.700114	-0.155107	-0.88816	-0.0178328	0.011363	0.94658	0.86244
1954	12971	AA108639	crystallin, mu	Crym	1	0.869606	0.786455	0.914781	1.15056	1.1809	1.17057	1.18613		-0.906494	0.408278	0.162925	0.929544	-0.368774	-1.90998	0.931273
1955	27367	AA108363	ribosomal protein L3	Rpl3	1	1.08528	0.976928	0.857537	0.940312	0.996197	1.15204	1.17955		-2.03492	-1.48279	0.819749	-0.420298	0.939361	0.953012	0.989571
1956	57320	AA108826	Parkinson disease (autosomal recessive, early onset) 7	Park7	1	0.928543	0.883243	0.970069	1.0666	1.08631	0.980548	1.10795		-0.0475156	-1.51415	0.486584	0.927776	0.811632	-1.98764	-1.78825
1957	19265	AA108738	protein tyrosine phosphatase, receptor type, C polypeptide-associated protein	Ptprcap	1	0.949604	1.01732	0.873757	0.935995	1.04833	1.0626	1.12724		-1.73994	-2.03601	-0.0929338	-1.99297	-2.00275	-0.979712	-1.30077
1958	19215	AA108857	prostaglandin D2 synthase (brain)	Ptgds	1	0.970628	1.03223	0.970133	1.03616	1.03518	0.974421	0.998037		-0.00317354	-1.35184	-1.93454	0.980033	-1.91844	-0.614704	0.785397
1959	12176	AA105295	BCL2/adenovirus E1B 19kDa-interacting protein 1, NIP3	Bnip3	1	0.932005	0.937713	0.765567	0.91569	1.05255	1.07999	1.10506		-0.25164	0.811632	0.999985	-1.73994	0.905544	-1.41835	-1.07068
1960	12747	AA108933	CDC-like kinase	Clk	1	1.05668	0.952794	0.711363	0.858171	0.882995	1.06316	1.12348		0.495801	0.321676	0.992646	0.0682628	0.959797	-1.91844	-1.48279
1961	20750	AA108928	secreted phosphoprotein 1	Spp1	1	1.06882	1.02726	0.848182	1.29369	1.26149	1.28084	1.20163		-0.869822	-0.368774	0.945202	0.998347	0.996304	0.999999	0.999231
1962	12315	AA109041	calmodulin 3	Calm3	1	0.960082	0.898865	0.872282	1.12905	1.09194	1.22709	1.18222		0.687732	0.717934	0.999826	0.999367	0.999871	0.999998	1
1963	17874	AA110412	myeloid differentiation primary response gene 88	Myd88	1	1.00771	1.00901	1.0063	1.00794	1.01001	1.0091	1.01252		-1.84338	-1.5296	0.21415	0.994366	-0.0475156	-1.57497	-0.70521
1964	23857	AA111662	cyclin D binding myb-like transcription factor 1	Dmtf1	1	0.914852	0.722022	0.759135	0.966033	1.10275	1.34482	1.1952		-1.76455	0.967453	0.999426	-1.03439	-0.778204	0.838747	0.896068
1965		AA111722			1	0.832169	0.863489	0.754009	1.05992	0.90226	0.954122	0.998133		0.999528	-1.16055	0.998632	-0.66889	-1.76455	0.900906	0.987255
1966	225363	AA111688	eukaryotic translation termination factor 1	Etf1	1	0.951012	0.807481	0.747744	0.916404	1.17431	1.14166	1.14717		0.0821722	0.999206	0.999649	-1.3179	0.905544	0.756156	0.803207
1967	15001	AA118886	histocompatibility 2, O region alpha locus	H2-Oa	1	0.882417	1.37325	0.937689	1.15438	1.17956	0.907789	0.993111		0.188801	-1.26622	0.175929	-0.437632	-1.94952	-0.543139	0.604538
1968		AA118721			1	0.819569	0.835253	0.81295	1.23226	1.17495	1.21045	1.21608		0.99918	0.997877	0.999702	0.970756	0.999985	0.999965	0.999995
1969	22596	AA118775	X-ray repair complementing defective repair in Chinese hamster cells 5	Xrcc5	1	0.955648	0.860607	1.18136	0.938509	1.0236	1.01251	1.2229		-1.72731	0.999586	-0.235291	0.789972	0.98213	0.734878	0.953012
1970		AI530569			1	0.895261	0.820324	1.02144	1.04918	0.999682	1.24916	1.30367		-1.08876	0.9998	-1.46689	-0.596734	-0.455042	0.999995	1
1971	50497	AA119654	heat shock protein 4	Hsp70-4	1	0.908787	0.805659	1.01684	0.942184	0.877699	1.02971	1.00797		-1.38534	0.999887	-0.0178328	0.871631	0.965676	-1.77652	0.619504
1972	66447	AA120639	microsomal glutathione S-transferase 3	Mgst3	1	1.0249	0.778158	1.05965	1.22544	1.13883	1.10448	1.16071		-1.30077	0.0682628	0.0821722	-0.155107	0.980578	-1.05256	0.977708
1973	20841	AA118392	zinc finger protein 143	Zfp143	1	1.02343	0.826897	0.996892	0.839431	0.938815	1.3917	1.19331		0.771167	0.845851	0.994021	-1.08876	-0.632722	0.990156	0.467772
1974	12499	AA120757	ectonucleoside triphosphate diphosphohydrolase 5	Entpd5	1	0.925966	0.886304	0.977412	1.18819	1.01849	1.12611	1.15263		-2.01134	-1.98201	-0.334847	0.681388	-2.0275	0.397911	0.486584
1975		AA125367			1	0.772594	0.842075	0.873909	0.888164	0.992027	1.09689	1.07045		0.998347	0.999346	0.67494	0.874574	-1.87348	0.366027	-1.24881
1976		AI323634			1	0.895547	0.973966	0.965954	0.921033	1.07772	1.00471	1.07024		0.823695	0.397911	0.980578	-1.76455	0.548509	-1.56002	0.835092
1977	12465	AA120241	chaperonin subunit 5 (epsilon)	Cct5	1	0.913597	0.789501	0.965838	0.901066	1.16092	1.28449	1.32741		0.654964	0.949243	-0.741657	-0.70521	0.803207	0.999637	0.999923
1978	21841	AA117605	cytotoxic granule-associated RNA binding protein 1	Tia1	1	0.954292	0.712179	0.739429	1.02403	0.88988	0.931337	1.01226		-2.03601	0.98651	0.987962	-2.03678	0.136526	-0.420298	-1.72731
1979	12429	AA124592	cyclin B1, related sequence 1	Ccnb1-rs1	1	0.936216	0.939849	0.940266	1.11487	1.15412	1.51661	1.13635		-1.64711	0.467772	0.238972	0.831365	0.504894	0.999998	0.654964
1980		AA120355			1	0.953339	0.737518	0.805024	1.01697	0.862787	1.03092	1.04561		0.939361	0.999996	0.999367	0.226627	-0.778204	-1.99297	-0.961433
1981		AA120351			1	0.803685	0.854753	0.803659	1.17735	0.96783	1.01275	0.907111		0.766251	0.965676	0.985315	0.201541	-1.99801	0.162925	0.990437
1982	18201	AA122528	neutral sphingomyelinase (N-SMase) activation associated factor	Nsmaf	1	0.823997	0.883796	0.892652	1.04781	0.956548	1.19971	1.13276		0.997442	-0.318018	0.565107	-2.03678	0.162925	0.993067	-1.61881
1983	16963	AA120030	chemokine (C motif) ligand 1	Xcl1	1	0.929089	0.760334	0.884353	0.924061	0.875996	1.17187	1.13034		-0.507702	0.999096	0.995432	-1.16055	0.0682628	0.823695	0.448454
1984	233835	AA116548	trinucleotide repeat containing 6	Tnrc6	1	0.935642	0.745288	0.700006	0.941227	0.961573	1.18461	1.17362		-0.687032	0.999985	0.999925	0.201541	-0.420298	-0.437632	0.458177
1985	20292	AA139170	small chemokine (C-C motif) ligand 11	Ccl11	1	0.869945	0.653726	0.970682	1.0128	1.05942	1.10079	1.01214		0.815729	0.998795	0.998496	-0.437632	-0.219044	-1.68813	-0.83315
1986	22019	AA139288	tripeptidyl peptidase II	Tpp2	1	0.991905	0.842348	0.813444	1.03577	1.09425	1.22966	1.15807		-1.16055	0.397911	0.969145	0.188801	-0.472526	0.162925	-0.155107
1987	12460	AA123360	copper chaperone for superoxide dismutase	Ccs	1	1.16564	0.898649	0.848778	1.05317	0.962143	1.03505	1.10671		-1.83284	-1.56002	-0.472526	0.789972	0.745701	0.64111	-0.88816
1988	14600	AA124236	growth hormone receptor	Ghr	1	1.17529	0.956618	0.670407	0.886512	0.839986	0.794289	0.806312		0.949243	0.188801	0.999935	0.789972	0.999937	0.999984	1
1989	13850	AA124202	epoxide hydrolase 2, cytoplasmic	Ephx2	1	1.11485	1.02633	0.815148	1.06402	1.03357	1.11421	1.06326		0.596884	-0.155107	0.96996	0.936235	-1.48279	0.868629	-0.906494
1990	14433	AA122891	glyceraldehyde-3-phosphate dehydrogenase	Gapd	1	0.999511	0.999957	0.999683	1.00011	0.998656	1.0028	1.00342		-1.84338	-1.61881	0.811632	0.556868	-0.0776768	-1.51415	-1.96338
1991	21859	AA145784	tissue inhibitor of metalloproteinase 3	Timp3	1	1.01628	1.10934	0.804775	1.31255	0.913014	1.12413	1.07276		-1.51415	-1.03439	0.842333	0.914248	0.794464	-0.741657	0.467772
1992	110454	AA145865	lymphocyte antigen 6 complex, locus A	Ly6a	1	1.06988	0.942858	0.937161	1.1519	1.35159	1.75552	1.47652		-0.139395	-1.90126	-1.77652	0.990711	1	1	1
1993	20517	AA140078	solute carrier family 22 (organic cation transporter), member 1	Slc22a1	1	1.20428	1.15659	0.44524	1.19537	0.932853	1.35244	0.961741		-0.851484	-1.3179	0.978312	-0.632722	-1.883	-0.268089	-1.43466
1994	11501	AA154162	a disintegrin and metalloprotease domain 8	Adam8	1	0.919259	0.810971	0.977863	0.959953	0.882739	1.20238	1.17297		-1.83284	0.991487	0.54003	0.661729	-0.385866	0.67494	0.975135
1995	15482	AA154104	heat shock protein 1-like	Hspa1l	1	0.844916	0.83322	1.00288	1.0675	0.984732	1.19207	1.27356		0.654964	0.785397	-1.83284	-1.90126	-1.94952	0.975135	0.99824
1996	20963	AA142676	spleen tyrosine kinase	Syk	1	0.930981	0.746511	0.899244	0.927589	0.933148	1.17816	1.12104		-1.82205	0.999982	0.956525	0.604538	0.723678	0.287026	-0.0475156
1997	21456	AA143990			1	1.11178	0.78825	0.906317	1.00897	0.973277	1.18131	1.27617		-0.507702	0.960837	0.789972	-1.26622	-0.368774	0.983567	0.992646
1998	20773	AA123420	serine palmitoyltransferase, long chain base subunit 2	Sptlc2	1	0.780282	0.841131	0.719587	1.01947	0.827012	0.937406	1.15269		0.999671	0.999496	0.995293	0.994366	0.994021	0.99197	0.994532
[truncated: 11,363 more rows]
