# Supplementary material for: Temporal and Dose-Dependent Hepatic Gene Expression Patterns in Mice Provide New Insights into TCDD-Mediated Hepatotoxicity
Source: Oxford University Press journal article supplement (doi:10.1093/toxsci/kfi162), 2005-03-30
Supplement: kfi162_Supplementary_Data.zip [file kfi162_Supplementary_Data.zip › kfi162supptable4.xls]

## Sheet: Suppl-Table4
Suppl-Table 4. TCDD time course microarray data. Ratios represent expression relative to the time matched vehicle control. P1t-values represent posterior probabilities of activity on a per gene and time-point basis using the model-based t-value. Blank values for ratios are due to filtered values during analysis while blank values for t-statistic are due to the absence of expression values or inap…
Clone ID	LocusLink Number	GenBank Accession	Gene Name	Gene Abbreviation	2 hour ratio	4 hour ratio	8 hour ratio	12 hour ratio	18 hour ratio	24 hour ratio	72 hour ratio	168 hour ratio		p1t- 2hour	p1t- 4hour	p1t- 8hour	p1t- 12hour	p1t- 18hour	p1t- 24hour	p1t- 72hour	p1t- 168hour
1		AA466341			1.04341	0.832632	0.909473	0.914402	0.860996	0.906794	0.97569	0.999499		-23195	-6.9976	-2984.05	-3910.91	-97.7862	-2566.1	-32996.7	-39618.8
2	13030	AA510750	cathepsin B	Ctsb	1.07103	1.0093	0.844114	0.884	0.894934	1.01336	0.967295	0.94732		0.173331	-2.37219	0.99844	0.95649	0.904545	-2.27739	-1.46425	-0.40893
3	15251	AA511100	hypoxia inducible factor 1, alpha subunit	Hif1a	0.997892	0.924819	0.904727	0.828188	0.801044	0.886709	0.984521	0.9205		-1.01033	0.436821	0.74304	0.997476	0.999707	0.893186	-0.909701	0.5199
4	17210	AA498218	myeloid cell leukemia sequence 1	Mcl1	0.954449	0.956611	0.929928	0.859841	0.867762	1.00251	0.950395	1.02545		-0.403567	-0.428316	-0.0918587	0.721922	0.662144	-0.674431	-0.360548	-0.590044
5	66256	AA498292	signal sequence receptor, beta	Ssr2	1.18815	0.864929	0.874102	0.898207	1.06247	1.00095	0.869383	1.04879		0.885305	0.682533	0.546708	-0.025318	-1.82632	-3.59024	0.623586	-2.39918
6	14073	AA498162	fatty acid amide hydrolase	Faah	0.952066	0.929355	0.934076	0.861995	0.82361	0.951026	0.905876	0.986121		-6.46109	-4.82161	-5.20794	-0.47032	0.564471	-6.41257	-3.03724	-8.0361
7	15945	AA510124	chemokine (C-X-C motif) ligand 10	Cxcl10	0.911601	0.923272	0.922178	0.976271	0.841074	1.02802	0.978827	1.08553		0.602668	0.146893	0.19814	-6.36363	0.999397	-5.85418	-6.697	0.246823
8	17191	AA510881	methyl-CpG binding domain protein 2	Mbd2	0.969612	1.17512	1.04462	1.25245	1.08603	1.08728	1.03931	0.98816		-10.7256	0.998582	-6.76309	0.999998	-0.0482874	0.0192658	-8.28615	-15.5961
9	21413	AA518455	transcription factor 4	Tcf4	0.96214	0.948596	0.902457	0.924673	0.839192	0.912188	1.03685	1.00959		-24.5644	-20.1206	-5.81687	-11.8865	0.563761	-8.1278	-25.2456	-30.6921
10	17750	AA521728	metallothionein 2	Mt2	0.999708	0.976761	0.930445	1.01004	0.995209	0.980981	1.00037	1.01512		-39618.8	-33196.2	-7717.8	-38378.6	-39331	-35237.7	-39618.8	-36811.7
11	78330	AA521758	RIKEN cDNA 1500032D16 gene	1500032D16Rik	0.91557	0.901512	0.889425	0.889201	0.933696	0.899971	0.957191	1.02067		-4.87216	-3.05908	-1.85395	-1.85395	-7.57628	-2.93156	-11.1262	-13.6562
12	15979	AA541842	interferon gamma receptor	Ifngr	1.08749	0.911697	0.944482	0.820807	0.839716	0.979504	0.93993	0.985309		-8.31909	-7.30019	-11.2104	-0.0448708	-0.824471	-13.957	-10.6963	-14.1881
13	68011	AA530032	small nuclear ribonucleoprotein polypeptide G	Snrpg	1.00961	1.32925	1.35441	1.27796	1.26828	1.38461	1.34879	1.22266		-6.23629	0.999998	1	0.999962	0.99993	1	1	0.998884
14	17220	AA544948	minichromosome maintenance deficient 7 (S. cerevisiae)	Mcm7	1.00876	0.9456	0.947066	0.890582	0.931154	1.02936	1.13909	1.07359		-6.21971	-1.55793	-1.70638	0.896566	-0.346822	-4.5339	0.963115	-0.370877
15	20823	AA544321	Sjogren syndrome antigen B	Ssb	0.926142	0.907009	0.913694	0.903916	0.818113	0.99748	0.957512	0.978933		-0.503285	0.0893058	-0.0948698	0.173331	0.981257	-2.46153	-1.64372	-2.24306
16	15388	AA545633	heterogeneous nuclear ribonucleoprotein L	Hnrpl	1.08177	0.905647	0.955723	0.943368	0.948115	0.888601	0.712459	0.686459		-1.09083	-0.561176	-1.93693	-1.62418	-1.73953	-0.127605	0.998865	0.999757
17	20375	AA543251	SFFV proviral integration 1	Sfpi1	0.907796	0.917315	0.941216	1.02717	0.897188	0.889093	0.936825	0.927194		0.886977	0.780394	0.145927	-1.62418	0.950414	0.974575	0.313278	0.598625
18	100563	AA546085	expressed sequence AF013969	AF013969	1.00871	0.969729	0.851455	0.913846	0.861774	0.877128	0.943211	1.02327		-2.39443	-1.7016	0.992322	0.566019	0.982772	0.94911	-0.40893	-2.00317
19	19184	AA546216	protease (prosome, macropain) 26S subunit, ATPase 5	Psmc5	0.967565	1.03584	0.91802	0.950146	0.94921	0.935769	0.997721	1.07279		-1.11174	-0.965672	0.850162	-0.0787164	-0.0311237	0.503976	-2.45571	0.598625
20	21928	AA537672	tumor necrosis factor, alpha-induced protein 2	Tnfaip2	0.965224	1.07507	0.931012	0.935351	0.88575	0.944611	1.0847	0.927207		-1.83178	-0.503285	-0.427577	-0.699533	0.650957	-1.04903	-0.211893	-0.390399
21	22221	AA537117	upstream binding protein 1	Ubp1	1.00599	0.934931	1.05719	0.852582	0.887263	0.957152	1.01159	1.1765		-1.00368	-0.226423	-0.43115	0.857847	0.565542	-0.634067	-0.982547	0.87246
22	18667	NM_008829	progesterone receptor	Pgr	0.988069	1.13447	1.04546	1.12045	1.1069	1.19084	1.10777	1.08521		-0.933176	0.964615	-0.177882	0.927813	0.863853	0.998594	0.869644	0.659913
23	59050	AA638670	RIKEN cDNA 5730427N09 gene	5730427N09Rik	1.09161	1.07092	0.888543	0.818425	0.689352	0.769308	0.906251	0.750315		0.213823	-0.129531	0.628131	0.979008	0.999996	0.998759	0.382817	0.999644
24	19124	AA672430	protein C receptor, endothelial	Procr	0.938142	1.06441	1.02651	0.877726	0.825148	0.976483	0.966088	1.06584		-0.580047	-0.601915	-0.933176	0.255599	0.757574	-0.943838	-0.876472	-0.580047
25	21408	AA616580	zinc finger protein 354A	Zfp354a	1.06266	0.938263	0.83776	0.899691	0.862009	0.846074	1.04407	1.01282		-0.0934804	-0.0221752	0.983076	0.672042	0.935913	0.972664	-0.478023	-0.958448
26	53357	AA592727	phospholipase A2, group VI	Pla2g6	0.966635	0.936628	0.932851	0.8716	0.892637	0.903088	0.973258	1.02346		-0.0104178	0.831552	0.875225	0.999844	0.997833	0.99289	-0.287132	-0.454683
27		AA793036	vascular endothelial growth factor A	Vegfa	0.951803	0.929289	0.957223	0.874127	0.83822	0.895001	0.985752	1.00854		0.170913	0.700932	-0.0104178	0.994523	0.999844	0.968875	-0.862023	-0.958448
28	12802	AA796154	cannabinoid receptor 2 (macrophage)	Cnr2	0.939137	0.940688	0.936728	0.878635	0.896409	0.927354	0.954755	1.04743		0.149056	0.10459	0.203199	0.937433	0.838478	0.410204	-0.262862	-0.250717
29	14716	AA619097			0.819885	1.06674	0.631838	0.505944	0.318473	0.423777	0.608349	0.551503		0.37352	-0.771691	0.99348	0.999974	1	1	0.997236	0.999751
30	18458	AA615571	poly A binding protein, cytoplasmic 1	Pabpc1	0.966138	0.994028	1.00471	1.05828	0.984077	1.0975	1.14003	1.08234		-0.177882	-0.979013	-0.991968	0.511986	-0.789405	0.947207	0.997766	0.863853
31	19223	AA616188	prostaglandin I2 (prostacyclin) synthase	Ptgis	0.997151	0.88532	0.817804	0.841714	0.968954	0.975778	1.14001	1.23652		-1.00941	0.797288	0.994194	0.975387	-0.715459	-0.823161	0.857847	0.996787
32	14688	AA647753	guanine nucleotide binding protein, beta 1	Gnb1	1.00068	1.04807	0.991956	1.0184	0.939005	0.909414	1.04617	1.03115		-1.01187	-0.23857	-0.982547	-0.869328	0.149056	0.700932	-0.287132	-0.634067
33	18674	AA869051	solute carrier family 25 (mitochondrial carrier; phosphate carrier), member 3	Slc25a3	0.923003	0.912182	0.953501	0.886754	0.800614	0.918862	0.878559	1.04894		-0.23857	-0.0695802	-0.695754	0.315996	0.940377	-0.177882	0.419162	-0.695754
34	15251	AA870338	hypoxia inducible factor 1, alpha subunit	Hif1a	1.01137	1.19089	1.43706	1.50547	1.47681	1.57031	1.54957	1.44442		-0.938598	0.998939	1	1	1	1	1	1
35	22352	AA870527	vimentin	Vim	1.02568	1.04239	0.965552	1.03924	0.988195	0.923091	1.01667	0.991221		-0.634067	-0.165771	-0.359613	-0.250717	-0.921792	0.722607	-0.839164	-0.962943
36	27354	AA674908	nibrin	Nbn	1.04339	1.11528	1.04082	0.834087	1.11949	0.999142	0.883622	0.904149		-0.876472	-0.383593	-0.953764	0.0477123	-0.869328	-0.989025	0.213823	-0.665372
37		AA636829			1.0088	0.921317	0.961439	0.984572	0.962297	0.947224	0.960992	1.07284		-0.953764	0.841851	-0.0934804	-0.831237	-0.129531	0.354674	-0.0815155	0.695316
38	78142	AA637702	RIKEN cDNA 7330406P05 gene	7330406P05Rik	0.956662	1.18846	1.18852	1.04878	1.16256	0.964186	1.16375	1.32439		-0.201413	0.983871	0.983871	-0.142029	0.954955	-0.333778	0.957109	0.999966
39	14923	AA929137	guanylate kinase 1	Guk1	1.01299	1.05649	1.06073	1.00978	0.979961	0.875339	1.02323	1.10801		-0.600112	0.254468	0.336572	-0.634375	-0.497088	0.97896	-0.452193	0.886642
40	19166	AA762631	proteasome (prosome, macropain) subunit, alpha type 2	Psma2	1.05217	1.04496	1.05181	1.02245	1.02463	1.07108	1.10491	0.97634		-0.191596	-0.297097	-0.201413	-0.56819	-0.550348	0.0895523	0.531089	-0.55643
41	15569	AA636307	ELAV (embryonic lethal, abnormal vision, Drosophila)-like 2 (Hu antigen B)	Elavl2	0.857736	1.01578	0.785606	0.707355	0.698636	0.940495	1.03628	1.12545		0.345418	-0.658541	0.824278	0.98004	0.985124	-0.436375	-0.590044	0.0394344
42	15395	AA636231	homeo box A10	Hoxa10	0.955943	1.02584	1.02818	0.932064	0.969256	0.896893	0.943122	1.09814		-0.503411	-1.07368	-1.01414	0.224293	-0.925564	0.825417	-0.0898594	0.666562
43	110198	AA636461	aldo-keto reductase family 7, member A5 (aflatoxin aldehyde reductase)	Akr7a5	1.00985	0.979285	0.859444	0.925574	0.989585	0.97365	0.962257	0.94438		-1.3485	-1.11876	0.995239	0.591203	-1.33657	-0.938554	-0.547183	0.092779
44	54152	AA681606	dynein, axonemal, light chain 4	Dnalc4	0.932539	1.09328	0.948875	0.927577	0.874045	1.01724	1.04131	1.05062		0.00859951	0.607506	-0.793996	0.209826	0.976516	-3.17874	-1.7155	-1.12076
45		AA656606			0.963463	0.997244	0.953963	0.845345	0.833943	0.930128	0.880671	0.915708		-2.8236	-3.58743	-2.4255	0.867198	0.923279	-1.27896	0.424862	-0.65202
46	14828	AA693136	heat shock 70kD protein 5 (glucose-regulated protein)	Hspa5	0.997978	0.920357	0.876881	0.994823	1.1354	1.07456	1.25995	1.39319		-3.58532	0.546708	0.980736	-3.54552	0.972989	0.209826	0.999997	1
47		AA693054			1.03148	0.926069	0.883811	0.828668	0.88518	1.06716	0.963986	1.06513		-3.249	-1.85404	-0.34587	0.708965	-0.387339	-3.12245	-3.10303	-2.86958
48	14422	AA823657	UDP-N-acetyl-alpha-D-galactosamine:(N-acetylneuraminyl)-galactosyl-N-acetylglucosaminylpolypeptide-beta-1, 4-N-acetylgalactosaminyltransferase	Galgt2	1.03282	0.992204	1.03962	1.0431	1.01984	0.971809	1.01287	1.06014		-2.29268	-3.4985	-1.85404	-1.60503	-3.06323	-2.52935	-3.35779	-0.583368
49	20813	AA691161	signal recognition particle 14	Srp14	1.04157	0.93269	0.970259	1.0692	0.997804	1.11608	1.31874	1.18438		-1.55003	0.151422	-2.31948	0.0252593	-3.58275	0.915038	1	0.999186
50	12323	AA691743	calcium/calmodulin-dependent protein kinase II, beta	Camk2b	0.986327	0.974427	0.742721	0.817451	0.839485	0.970117	1.02697	1.09216		-3.44723	-3.12245	0.999952	0.987502	0.953361	-2.95845	-3.08328	-0.325428
51	233575	AA759453	FGF receptor activating protein 1	Frag1	1.20213	0.849935	1.43875	0.987905	0.989771	0.733111	0.810635	0.515211		-0.285131	-0.698667	0.955796	-3.56293	-3.57225	0.857226	0.105585	0.999989
52	57312	AA733327	mitochondrial ribosomal protein S31	Mrps31	1.00152	0.940088	1.21601	1.17715	1.10771	0.960093	1.06635	1.07426		-3.58907	-1.14685	0.994744	0.966305	0.402241	-2.29268	-1.01768	-0.65202
53	66043	AA755526	RIKEN cDNA 0610008F14 gene	0610008F14Rik	0.952034	0.851839	0.939972	0.916657	0.818492	0.870928	0.949112	1.03858		-1.74319	0.969819	-1.01768	0.0579829	0.997422	0.901172	-1.55003	-2.37274
54		AA645035			1.01496	0.869328	0.88361	1.00742	0.955207	1.07208	1.08441	1.05413		-3.23196	0.992214	0.972227	-3.4985	-1.14685	0.181009	0.546708	-0.675257
55	22401	AA710789	wild-type p53-induced gene 1	Wig1	0.930334	0.924394	0.919388	0.835215	0.812417	0.958287	0.897528	1.03537		-2.18451	-1.9648	-1.7986	0.498752	0.750733	-3.04286	-1.01768	-3.21457
56		AA712092			1.02852	1.04412	0.895338	1.03228	0.960781	0.913112	1.10392	1.03922		-2.68011	-1.7155	0.823226	-2.45168	-1.93714	0.508657	0.668576	-2.02002
57	78891	AA726689	SCY1-like 1 (S. cerevisiae)	Scyl1	0.999148	0.908943	1.03924	1.09761	1.01273	1.03747	1.08792	1.05424		-3.59024	0.695991	-1.88175	0.661406	-3.37179	-2.02002	0.468074	-0.941788
58	21917	AA734516	thymopoietin	Tmpo	1.01229	0.959811	0.988381	0.918993	0.899275	1.03986	0.97895	0.868484		-7.74763	-4.37817	-7.80123	-0.0435591	0.685658	-4.65527	-6.96366	0.968459
59	14998	AA717747	histocompatibility 2, class II, locus DMa	H2-DMa	1.00926	0.959435	0.937436	1.07205	0.958081	1.00187	0.974922	1.05452		-7.89858	-3.88366	-1.01745	-0.60972	-3.66721	-8.1749	-6.21444	-2.25943
60	66144	AA636882	ATPase, H+ transporting, V1 subunit F	Atp6v1f	0.975745	0.959594	0.957208	1.05904	1.0327	0.995045	1.01303	1.06517		-6.46109	-4.1574	-3.77511	-2.03409	-5.42635	-6.92056	-7.66125	-1.3768
61	13798	AA711901	engrailed 1	En1	0.933175	1.06794	0.946473	0.849474	0.882514	0.848625	0.911047	1.00069		-2.93571	-3.29568	-4.37817	0.884622	0.350934	0.890544	-1.01745	-8.18614
62	11770	AA712099	fatty acid binding protein 4, adipocyte	Fabp4	0.905751	0.959877	0.995591	1.05259	1.00142	1.01666	1.37729	1.57023		-0.12869	-5.31743	-8.14874	-4.1574	-8.18239	-7.63089	0.999999	1
63		AA739325			0.988407	1.02139	0.990717	0.845028	0.917407	0.89939	0.883851	0.977538		-7.82681	-7.04813	-7.96273	0.993375	-0.12869	0.593402	0.854175	-6.87692
64	20184	AA739003	retinoid X receptor interacting protein 110	Rxrip110	0.995108	1.05681	1.00278	1.06225	1.04606	1.13477	1.13914	1.07511		-8.10778	-2.30557	-8.16368	-1.73428	-3.61353	0.934405	0.950298	-0.60972
65	22190	AA880165	ubiquitin C	Ubc	0.936032	0.949191	0.925925	0.896397	0.929554	0.944253	1.0441	1.10016		0.442672	-0.552824	0.776092	0.991771	0.685658	-0.085461	-1.69299	0.962537
66	16188	AA797533	interleukin 3 receptor, alpha chain	Il3ra	0.929248	1.01313	0.933025	0.922246	0.873969	0.855448	0.890894	0.973567		0.0363594	-7.53528	-0.219221	0.391701	0.990694	0.998706	0.951672	-5.7486
67		AA880004			1.06425	1.0626	1.03567	1.1129	1.11493	1.02821	1.09998	1.19376		-2.44609	-2.63816	-5.69543	0.430282	0.478475	-6.55683	-0.00296038	0.991514
68	19752	AA790398	ribonuclease, RNase A family, 1 (pancreatic)	Rnase1	0.945522	1.04786	0.984193	0.950253	0.903767	0.901645	1.0011	1.12054		-2.58966	-3.77511	-7.85157	-3.19154	0.512292	0.574307	-8.18239	0.764789
69	18575	AA856411	phosphodiesterase 1C	Pde1c	1.00502	1.02714	0.937983	0.924666	0.961916	1.00662	1.13833	1.12221		-8.1194	-6.55683	-2.12314	-0.852764	-5.15301	-8.08182	0.857886	0.678108
70	16477	AA759387	Jun-B oncogene	Junb	1.18218	1.39284	0.923971	0.913718	1.00021	0.872917	0.872347	0.901894		0.963592	1	-1.41493	-0.60972	-8.18661	0.792137	0.797251	0.0363594
71	14148	AA881439	ferredoxin 1	Fdx1	1.27884	1.12014	1.18535	1.06085	0.957313	0.995635	1.16093	1.09503		-0.00296038	-4.32287	-1.73428	-6.92056	-7.46785	-8.18614	-2.58966	-5.48055
72	75705	AA867136	RIKEN cDNA 2310046H11 gene	2310046H11Rik	0.97662	1.03202	1.13062	0.972604	0.904356	1.05161	1.16637	1.13785		-7.5679	-7.08948	-0.443569	-7.32449	-1.61157	-5.69543	0.466765	-0.196072
73		AA867214			1.08522	0.902125	0.886139	1.0094	0.901073	0.935547	0.961113	1.03532		-0.552824	0.417659	0.78156	-7.96273	0.454832	-1.77597	-4.98763	-5.58841
74	12568	AA881868	cyclin-dependent kinase 5	Cdk5	1.0323	0.97869	0.908203	0.932447	0.979761	0.989328	1.06754	1.09925		-4.71073	-6.36363	0.846486	0.0168579	-6.50918	-7.69083	-0.290771	0.825632
75	71819	AA798124	kinesin family member 23	Kif23	0.813436	0.756108	0.631962	0.7203	0.778342	0.77526	0.816189	0.882582		0.996581	0.999979	1	0.999999	0.999828	0.999874	0.99573	0.611749
76	110119	AA915049	mannose phosphate isomerase 1	Mpi1	1.01693	0.96361	0.924262	0.892481	0.945433	0.9835	1.08841	1.01967		-7.13023	-4.04755	0.307895	0.945954	-1.3768	-7.13023	0.523138	-6.788
77	12579	AA914666	cyclin-dependent kinase inhibitor 2B (p15, inhibits CDK4)	Cdkn2b	1.391	1.74401	1.1836	1.57281	1.21213	1.28585	1.29478	1.31055		-0.640414	0.965226	-8.28615	0.76	-6.66521	-3.3549	-3.01134	-2.50158
78	228836	AA874407	cDNA sequence BC024558	BC024558	1.10416	0.961884	0.969389	0.974761	1.02449	1.04011	1.09487	1.06929		-3.64361	-13.3467	-14.3949	-15.1474	-15.2826	-13.2534	-4.74963	-8.49545
79	12122	AA915729	BH3 interacting domain death agonist	Bid	0.964227	0.931209	0.930135	1.02211	0.890637	0.883261	1.07808	1.01192		-13.7114	-7.87123	-7.66588	-15.5363	-2.26492	-1.57713	-7.26004	-16.0664
80	74255	AA939752	RIKEN cDNA 2610203K23 gene	2610203K23Rik	0.974868	0.96356	0.974992	0.844248	0.8317	0.928595	0.91663	0.947701		-14.8612	-12.9688	-14.8612	0.795021	0.901717	-6.08961	-4.02172	-9.87435
81	234734	AI154346	alanyl-tRNA synthetase	Aars	0.903356	0.832565	0.925532	1.12061	0.998497	1.03646	0.94931	1.09563		-0.607009	0.985125	-3.28465	0.103512	-16.6566	-11.9767	-8.18193	-1.48199
82	19217	AA958901	prostaglandin E receptor 2 (subtype EP2)	Ptger2	1.01431	0.975749	0.989519	0.998774	1.08617	0.870213	0.935562	1.05485		-15.7667	-14.1463	-16.1536	-16.6566	-2.32296	0.800381	-4.83417	-7.66588
83	19293	AA980158	parvalbumin	Pva	0.965913	0.939114	0.896998	1.00633	0.879459	0.99296	0.941957	1.04475		-12.7754	-6.86149	-0.70893	-16.5131	0.287327	-16.489	-7.46211	-10.9371
84	14705	AA980499	Bernardinelli-Seip congenital lipodystrophy 2 homolog (human)	Bscl2	1.02258	1.04357	0.919623	0.970276	0.88121	1.0095	0.977886	0.969399		-15.2157	-11.9767	-4.50035	-14.1463	-0.33083	-16.6647	-15.2157	-13.9753
85	68003	AI049437	RIKEN cDNA 3110001O07 gene	3110001O07Rik	0.997145	0.942831	1.035	1.06245	1.05531	1.17903	1.23816	1.13582		-16.6422	-9.34152	-13.7114	-9.02291	-10.1942	0.664713	0.969135	-0.541873
86	15401	AI006119	homeo box A4	Hoxa4	1.0107	0.918272	0.909392	0.984337	0.926839	1.12051	1.14826	0.977706		-16.0204	-0.816061	-0.0716694	-15.2826	-4.13897	0.358982	0.879829	-26.2201
87	16780	AI019837	laminin, beta 3	Lamb3	0.639624	0.511951	0.456719	0.568259	0.893887	0.749155	0.602235	0.879517		-3.77272	0.463449	0.865277	-0.629516	-27.4163	-16.0691	-1.80261	-26.2201
88	19222	AI019668	prostaglandin I receptor (IP)	Ptgir	1.01199	1.10417	0.922685	0.988485	0.976583	0.969271	0.999555	1.00484		-29.0574	0.490321	-0.947937	-29.1662	-23.8614	-19.7344	-31.1068	-30.7892
89	16590	AI020663	kit oncogene	Kit	0.962632	0.95309	0.926799	0.997237	0.983484	0.996194	1.01274	1.10739		-9.14751	-4.23378	0.575017	-30.9109	-24.5644	-30.7422	-27.1293	0.978911
90	12315	AI020695	calmodulin 3	Calm3	1.00938	1.0372	0.99523	0.963305	0.9295	0.917033	0.936783	1.30734		-30.6921	-25.2456	-31.0038	-25.0775	-13.4693	-9.60457	-21.6504	0.97956
91		AI120868			0.958346	1.07667	1.14835	1.34354	1.25613	1.37567	1.29816	1.12562		-14.3813	-2.72003	0.967475	1	0.999995	1	1	0.826285
92	14425	AI180761	UDP-N-acetyl-alpha-D-galactosamine:polypeptide N-acetylgalactosaminyltransferase 3	Galnt3	0.998309	1.01053	1.11384	1.18568	0.94634	1.03583	0.937314	0.858153		-56.4594	-55.1048	-11.6289	0.834059	-28.2158	-42.5599	-21.7742	0.529235
93	66711	AI180905	Shwachman-Bodian-Diamond syndrome homolog (human)	Sbds	0.986189	1.13569	1.18934	1.32358	1.30877	1.31961	1.17372	1.09103		-52.6333	0.729713	0.994175	1	0.999999	1	0.981165	-3.06302
94		AI036494			0.992007	1.13563	1.01325	0.976345	1.03145	0.91975	1.02299	0.974063		-56.0129	-6.34443	-55.2279	-52.4291	-49.6385	-22.0798	-52.6333	-51.567
95	12750	AI120656	CDC like kinase 4	Clk4	0.966314	0.99438	0.933947	0.892057	0.851313	0.827438	0.975014	1.13056		-32.6662	-55.6652	-5.53247	0.751749	0.997014	0.999842	-48.8509	0.856624
96	11605	AA832920	galactosidase, alpha	Gla	1.01845	0.951447	0.92343	0.986372	0.943622	1.01109	1.03118	0.994822		-98.4258	-68.7628	-36.2889	-100.803	-59.2634	-101.976	-88.6088	-102.56
97	268977	AA833086	latent transforming growth factor beta binding protein 1	Ltbp1	0.936062	0.865559	0.740813	0.916227	0.742967	0.716603	0.835393	0.797951		-70.0209	-16.1313	0.911497	-51.7803	0.899882	0.978085	-5.51775	-0.504273
98	14313	AA839542	follistatin	Fst	0.905554	0.857261	0.747921	0.786382	0.802179	0.679237	0.881706	0.894446		-94.0658	-46.6827	-0.495435	-7.5844	-9.04297	0.935606	-71.2348	-79.9052
99	56697	AI286847	A kinase (PRKA) anchor protein 10	Akap10	0.871889	0.952259	0.870526	1.01286	0.867795	0.893288	0.931663	1.12797		-5.13351	-290.757	-4.51359	-518.996	-3.56565	-23.0227	-150.927	-14.6997
100	18749	AI159395	protein kinase, cAMP dependent, catalytic, beta	Prkacb	0.971416	0.868138	0.729014	0.766419	0.709948	0.697165	0.736928	0.822289		-31545.5	-140.457	0.999824	0.977106	0.99998	0.999996	0.999131	-5.36481
101	15109	AI154681	histidine ammonia lyase	Hal	1.13366	0.744466	0.61545	0.610897	0.58706	0.458529	0.679613	0.876274		-78.3093	0.075143	0.999425	0.999567	0.999922	1	0.967261	-70.4725
102	20366	AI529008	small EDRK-rich factor 2 pseudogene	Serf2-ps	0.965516	0.930351	0.956263	1.18717	0.939412	0.912513	1.04943	1.03923		-95.6779	-50.3226	-84.5137	-0.409204	-61.8754	-30.0914	-79.6306	-91.8832
103	217737	AA833239	AHA1, activator of heat shock 90kDa protein ATPase homolog 1 (yeast)	Ahsa1	1.0557	1.36059	1.28526	1.25055	1.12851	1.1497	1.00534	1.01447		-41.9349	0.995275	0.92131	0.729689	-10.0518	-5.3843	-59.6647	-58.3798
104	13424	AA833263	dynein, cytoplasmic, heavy chain 1	Dnchc1	0.988638	1.15137	0.947615	0.930998	0.977941	0.913993	0.972311	1.09515		-57.135	0.8837	-21.2081	-9.47496	-49.9941	-2.94332	-45.1025	-2.77449
105	69019	AA833338	RIKEN cDNA 1810004F21 gene	1810004F21Rik	1.02413	1.00698	1.01822	1.09209	1.12273	1.11448	0.980423	1.23055		-26.5598	-31.7502	-28.8964	-1.8464	0.457705	0.126341	-28.1694	0.999629
106	101568	AI152017	vaccinia related kinase 3	Vrk3	0.923097	0.931043	0.922867	0.974113	1.04823	1.02168	0.899518	1.05708		-2.93411	-4.93941	-2.85758	-25.1478	-14.5691	-27.3887	0.126341	-10.6474
107	12912	AI158037	cAMP responsive element binding protein 1	Creb1	1.00654	1.12783	1.01852	0.917279	0.959239	1.05041	0.849596	1.32807		-32.2126	-15.1417	-31.7502	-21.8967	-29.4359	-28.4669	-7.89227	0.265164
108	12483	AI159351	CD22 antigen	Cd22	0.923985	0.947898	1.0365	1.018	1.63138	0.688171	0.894041	0.8846		-29.171	-29.6906	-31.8639	-26.5598	-2.35463	-7.47763	-20.501	-31.7502
109	11911	AI152301	activating transcription factor 4	Atf4	0.945222	0.990411	0.98145	0.839265	1.15037	1.09622	1.09717	0.868613		-21.1013	-31.9159	-30.8032	0.168218	-3.09079	-12.0102	-10.3194	-1.90624
110	11486	AI152550	adenosine deaminase	Ada	0.798152	0.821246	0.982496	0.910464	0.821462	1.05673	0.788142	1.05711		0.347418	-1.38205	-14.2152	-7.66869	-0.347787	-13.558	0.484073	-12.8647
111	12638	AI156185	cystic fibrosis transmembrane conductance regulator homolog	Cftr	0.964313	1.01138	0.946923	0.905118	0.931628	0.935348	0.890697	0.875058		-13.054	-14.4379	-12.6655	-6.75454	-11.294	-9.80157	-4.9526	-5.11512
112	15374	AI573524	hematological and neurological expressed sequence 1	Hn1	0.897942	1.00033	1.29493	1.24683	1.1083	1.04176	1.10927	1.41944		-1.56317	-14.4403	0.998093	0.983371	-1.95606	-10.7834	-1.90468	0.999993
113	16601	AI153855	basic transcription element binding protein 1	Bteb1	0.926422	0.916206	1.11593	1.03794	0.799418	1.37067	0.951418	1.26694		-10.3432	-9.24964	-7.20859	-13.3463	-0.188297	0.74197	-12.5275	0.103725
114	17105	AI157812	lysozyme	Lyzs	0.970298	0.997077	0.921255	0.880894	0.751539	0.893055	0.918993	1.56703		-13.507	-14.434	-8.87821	-4.3252	0.892737	-5.61525	-8.59874	0.999711
115	18260	AI154892	occludin	Ocln	0.977654	1.02845	0.846919	0.989984	0.918797	1.01869	0.977539	1.20066		-12.457	-11.4592	0.979422	-14.0303	-1.33833	-13.054	-12.3855	0.993875
116	53599	AI155272	CD164 antigen	Cd164	0.903049	0.972268	0.975754	0.989028	0.86502	0.830218	0.903284	0.944056		-4.40157	-13.233	-13.507	-14.2409	-0.897131	0.458955	-4.40157	-9.98349
117		AA981395			1.04085	1.16568	0.875666	0.778322	0.949063	0.898712	0.92683	1.14401		-12.3131	-1.08879	-2.11417	0.923211	-10.9559	-4.40157	-8.03976	-1.95606
118	12551	AA982462	cadherin 10	Cdh10	1.04836	1.00646	0.934488	1.0435	1.2418	1.05444	1.04563	0.899921		-12.9289	-14.3625	-13.233	-14.0303	-3.32217	-13.1745	-13.4547	-10.2539
119	11964	AI195304	ATPase, H+ transporting, V1 subunit A, isoform 1	Atp6v1a1	1.06068	0.965875	0.99449	0.931691	0.976634	0.970153	0.918527	1.12542		-7.94682	-12.0903	-14.3774	-6.04526	-13.1148	-12.3131	-4.02588	-0.824471
120	59027	AI227311	RIKEN cDNA 1110035O14 gene	1110035O14Rik	1.22357	1.23887	0.987569	0.805593	0.971423	0.980598	0.868179	1.07909		-0.555731	-0.163309	-14.3086	-0.11465	-13.7032	-14.0978	-3.87998	-9.98349
121	13013	AI037715	cystatin 9	Cst9	0.889445	0.894036	0.975725	0.95882	0.886204	0.858447	1.05194	1.00965		-1.75444	-2.1682	-13.507	-11.294	-1.47135	0.103725	-10.4322	-14.3086
122	22024	AI046576	cysteine-rich secretory protein 2	Crisp2	0.960163	0.841743	0.988961	0.835518	0.82305	0.929729	0.979145	0.999029		-4.74297	0.888188	-6.28178	0.920523	0.960981	-2.30088	-5.91751	-6.41553
123	20877	AI048384	aurora kinase B	Aurkb	0.917528	0.945639	0.937514	0.905859	0.796966	0.987562	0.846897	1.21859		-3.78963	-5.17703	-4.78401	-3.16396	0.588209	-6.3534	-0.521828	0.190234
124	102462	AI173034	RIKEN cDNA 1190002L16 gene	1190002L16Rik	0.984445	0.974346	1.00798	0.926399	0.964092	0.986326	1.01443	1.03151		-5.77998	-4.82476	-6.25216	0.0156308	-3.6107	-5.91751	-5.89118	-4.23224
125	14260	AI173036	formin	Fmn	0.911509	0.886174	0.957121	0.991132	0.887654	0.950123	1.01629	1.02602		-0.949758	-0.144203	-4.44865	-6.32086	0.157456	-3.87884	-6.1059	-5.69067
126		AI037693			0.875018	0.980733	0.974503	0.883019	0.828702	0.972947	0.932975	1.07257		-0.495876	-6.16586	-5.96837	-0.858357	0.656306	-5.91751	-3.78963	-3.74494
127	20671	AI048425	SRY-box containing gene 17	Sox17	0.812836	1.12366	1.16272		0.858618	0.78599	0.870644	1.03772		-0.656401	-3.3422	-2.81168	-3.38689	-1.04406	-3.3422	-6.18449	NA
128	11640	AI047078	A kinase (PRKA) anchor protein 1	Akap1	1.0189	1.25377	1.02708	0.943559	0.963861	0.98903	0.915983	1.01911		-5.1012	1	-3.96779	-0.165502	-2.46823	-5.91751	0.866188	-5.06273
129	54137	AI047576	proacrosin binding protein	Acrbp	0.909844	1.08348	0.878668	0.91415	0.861647	0.915425	0.958085	1.07305		-0.548101	-1.37896	0.578933	-0.799038	0.823637	-0.858357	-4.31932	-2.05638
130	15234	AI225823	hepatocyte growth factor	Hgf	0.918082	0.962481	0.964091	0.940069	0.866711	0.796132	0.807384	1.03069		-4.01214	-5.86425	-5.89118	-5.0239	-1.52154	0.487132	0.296959	-6.06262
131	14211	AI255214	SMC2 structural maintenance of chromosomes 2-like 1 (yeast)	Smc2l1	0.862671	1.06748	1.0615	0.972222	0.949258	0.991511	0.788327	1.42935		0.416991	-3.43162	-3.83426	-5.72099	-4.31932	-6.3534	0.984041	0.999963
132	11609	AI316812	angiotensin II receptor, type 2	Agtr2	0.997186	1.06963	1.06969	1.00282	1.07291	1.11652	0.937344	1.18007		-6.41553	-5.69067	-5.72099	-6.41553	-5.49786	-4.90537	-5.89118	-2.59576
133	13039	AA174215	cathepsin L	Ctsl	0.938709	0.800791	0.792596	0.782658	0.80374	0.660493	0.684916	0.635001		-3.47637	0.97379	0.984041	0.991246	0.968879	0.999995	0.999993	1
134	58810	AI605721	aldo-keto reductase family 1, member A4 (aldehyde reductase)	Akr1a4	0.978433	1.10142	1.13604	1.26189	1.22964	1.29817	1.51249	1.40688		-5.62844	0.123625	0.805381	0.999791	0.998642	0.999976	1	1
135	20090	W12819	ribosomal protein S29	Rps29	1.04123	1.02339	1.04557	1.04148	1.01601	1.10039	1.06167	1.16821		-4.70166	-5.80864	-4.36261	-4.66009	-6.12655	-0.741013	-3.16396	0.805381
136	74617	W10703	RIKEN cDNA 4833411K15 gene	4833411K15Rik	1.07018	1.28824	1.3251	1.3644	1.43488	1.43016	1.18668	1.29339		-2.13696	0.999652	0.999947	0.999993	1	1	0.951242	0.999734
137	11544	W10726	ADP-ribosylarginine hydrolase	Adprh	0.943906	0.853915	0.980203	0.941635	0.682269	0.774136	0.800568	0.963671		-2.76819	0.930484	-5.83674	-2.55307	1	0.999846	0.998551	-4.61826
138	16322	W10710	inhibin alpha	Inha	0.999043	1.05969	0.997174	0.963272	0.957947	0.939117	0.998701	1.03035		-6.41553	-1.41416	-6.39853	-3.6107	-2.98695	-1.0123	-6.41364	-4.49138
139		W12178			0.904172	1.19281	0.966184	0.962691	0.981017	1.03688	1.01764	1.01756		0.47596	0.995278	-4.36261	-4.01214	-5.72099	-4.18847	-5.80864	-5.83674
140	12581	W12208	cyclin-dependent kinase inhibitor 2D (p19, inhibits CDK4)	Cdkn2d	0.988299	0.836564	0.848883	0.98143	0.783852	0.972961	0.949124	1.06698		-6.21971	0.97379	0.940913	-5.91751	0.999529	-5.39487	-3.3422	-2.25957
141	14451	W13049	growth arrest specific 1	Gas1
142		W13631			1.00234	0.992168	0.988141	0.967968	1.00552	0.960927	1.08583	1.16679		-6.39287	-6.16586	-5.86425	-3.20842	-6.29553	-2.1776	0.763746	0.999783
143	17158	W09023	mannosidase 2, alpha 1	Man2a1	1.10147	1.07135	0.8847	0.746783	0.875866	0.847407	0.808996	0.982207		0.379027	-1.04406	0.848152	1	0.916184	0.990697	0.999725	-5.77998
144	20932	W12260	surfeit gene 4	Surf4	1.06364	0.997678	1.15282	1.07951	0.982711	1.00855	0.981907	0.897065		-0.699533	-2.46153	0.902194	-0.160905	-2.26624	-2.41943	-2.25479	0.598625
145	56334	W14393	RIKEN cDNA 1110032D12 gene	1110032D12Rik	1.02396	0.965147	1.0511	1.16261	1.05443	0.92967	1.03266	1.03456		-2.27739	-2.05062	-1.7016	0.606464	-1.62418	-1.04903	-2.12508	-2.08112
146	51793	W99217	dimethylarginine dimethylaminohydrolase 2	Ddah2	0.934431	0.971181	1.02627	1.04106	1.03339	1.01229	1.0306	1.05289		-0.52248	-1.97046	-2.06598	-1.58478	-1.84975	-2.37219	-1.93693	-1.15357
147		W12121			1.00952	1.03717	0.912071	1.03379	1.02124	0.963438	0.86399	1.08113		-2.37993	-1.42344	0.475374	-1.66313	-2.08112	-1.40293	0.980179	0.289184
148	18160	W13098	natriuretic peptide receptor 1	Npr1	1.09035	1.08792	1.15778	1.0877	1.10706	1.03752	0.984768	1.005		-0.246562	-0.317475	0.794412	-0.317475	0.145927	-1.86755	-2.35574	-2.45307
149	20024	W11216	RNA polymerase II transcriptional coactivator	Rpo2tc1	0.959728	0.945846	0.909334	0.992064	1.04607	0.964125	0.917798	1.01885		-0.924171	-0.19476	0.824183	-2.38734	-0.719632	-1.17448	0.703837	-2.06598
150		W13691			1.03515	1.1062	1.16703	1.33382	1.17955	1.2411	1.33613	1.26142		-2.08112	-0.317475	0.621774	0.9968	0.72188	0.946408	0.997083	0.970057
151	11792	W08299	apurinic/apyrimidinic endonuclease 1	Apex1	0.981582	0.989507	1.28491	1.24788	1.37704	1.12284	1.03939	1.21286		-2.1668	-2.36412	0.999987	0.99988	1	0.863455	-1.36174	0.999002
152	15902	W08387	inhibitor of DNA binding 2	Idb2	1.30518	1.39445	0.93843	1.08921	1.40126	1.12617	1.26279	1.51624		0.703837	0.917624	-1.98692	-1.66313	0.925428	-1.09083	0.485045	0.987401
153	15203	W11571	hephaestin	Heph	1.05238	0.856196	1.24076	1.06504	1.1927	1.3153	1.16605	1.16639		-2.08112	-0.211893	0.522365	-1.90261	0.0893058	0.850162	-0.246562	-0.229161
154		W34460			1.03172	1.09152	1.24917	1.42804	1.37051	1.45844	1.33982	1.40328		-1.73953	0.414416	0.999801	1	1	1	0.999999	1
155	66082	W34507	abhydrolase domain containing 6	Abhd6	1.01315	1.488	1.73815	1.55996	1.38997	1.29961	1.02389	1.29113		-2.37993	1	1	1	0.99998	0.999094	-2.20616	0.998711
156		W14555			1.01894	1.00439	0.964926	0.974456	1.01279	0.989035	0.883237	1.07087		-2.45307	-2.458	-2.31903	-2.09601	-2.41368	-2.42484	0.0893058	-1.11174
157	23833	W15001	CD52 antigen	Cd52	0.938854	0.953592	1.01664	1.13759	0.869522	0.907071	1.31695	1.99756		-1.62418	-1.95379	-2.40118	-0.111166	0.0893058	-0.780363	0.972402	1
158	56040	W14267	ribosomal protein, large, P1	Rplp1	0.815646	0.92339	1.03273	1.06798	0.981855	1.17097	1.4167	1.33499		0.828117	-1.13265	-2.19331	-1.48455	-2.37993	0.455617	0.998751	0.988773
159	12068	W18376	blocked early in transport 1 homolog (S. cerevisiae)	Bet1	1.00244	0.996498	0.998238	1.06411	0.88913	0.989529	0.980414	0.964603		-2.46153	-2.458	-2.46277	-0.986474	0.503976	-2.4076	-2.27739	-1.86755
160	27360	W18074	adducin 3 (gamma)	Add3	0.994427	1.03384	1.11594	1.06266	1.01058	1.00909	1.01399	1.10642		-2.42484	-1.34107	0.93589	0.0452614	-2.32867	-2.36412	-2.23104	0.886977
161	15399	AI324701	homeo box A2	Hoxa2	1.02455	1.11944	1.00107	1.03972	0.961424	0.992027	1.04171	1.0243		-2.01921	0.798912	-2.46365	-1.42344	-1.40293	-2.41368	-1.34107	-2.01921
162	68198	AI391300	NADH dehydrogenase (ubiquinone) 1 beta subcomplex, 2	Ndufb2	0.997184	0.758124	0.813477	0.74259	0.728002	0.599028	1.0582	0.952409		-2.46277	0.977226	0.811911	0.988444	0.994299	0.999998	-1.75829	-1.91986
163	28080	W36942	ATP synthase, H+ transporting, mitochondrial F1 complex, O subunit	Atp5o	1.00675	1.04375	0.965216	1.07721	1.06338	1.05489	1.08606	1.00733		-2.4299	-1.25799	-1.58478	0.0302809	-0.446339	-0.780363	0.276912	-2.41943
164	20016	W20956	RNA polymerase 1-1	Rpo1-1	0.938867	1.10023	1.08285	1.05124	1.05157	1.04164	1.02002	1.19565		-0.299554	0.61418	0.25192	-0.862227	-0.862227	-1.2996	-2.13924	0.9967
165		W34262			1.03139	1.06041	1.08777	1.07079	1.15128	1.21851	0.980918	0.93518		-2.35574	-2.19331	-1.64372	-1.97046	-0.60026	-0.40893	-2.34703	-2.05062
166	19042	W18642	protein phosphatase 1A, magnesium dependent, alpha isoform	Ppm1a	1.02879	1.01395	0.855396	0.846684	0.956691	0.911523	0.923716	1.02302		-1.60453	-2.23104	0.998115	0.999229	-0.739806	0.811911	0.606464	-1.88517
167	13542	W29705	dishevelled, dsh homolog 1 (Drosophila)	Dvl1	1.07489	1.06864	0.992372	0.976312	1.22168	1.07262	0.979656	1.08831		0.159704	-0.0311237	-2.4076	-1.95379	0.999693	0.213305	-2.08112	0.503976
168		W30430			1.1332	1.29588	1.25879	1.10689	1.23573	1.29404	1.30651	1.26048		-0.111166	0.963855	0.9113	-0.619942	0.850162	0.962878	0.972402	0.915562
169	14751	W29397	glucose phosphate isomerase 1	Gpi1	0.997496	1.04779	0.976206	1.03944	0.971958	1.08034	0.951828	0.987892		-2.458	-0.699533	-1.84975	-1.11174	-1.64372	0.485045	-0.561176	-2.29881
170	27053	W29492	asparagine synthetase	Asns	1.0075	0.848498	1.07737	1.02886	1.11888	1.04318	0.815636	1.08184		-2.45007	0.54895	-1.23714	-2.25479	-0.299554	-2.00317	0.843104	-1.13265
171	53323	W29921	huntingtin interacting protein 2	Hip2	1.03487	1.163	1.15916	1.22705	1.19689	1.1387	1.221	1.30244		-1.52491	0.98627	0.982772	0.999712	0.998115	0.947775	0.999572	0.999998
172	16619	W34620	kallikrein 27	Klk27	0.904608	0.98255	0.964115	0.97126	1.04982	0.898699	0.932117	0.919729		0.485045	-2.25479	-1.66313	-1.93693	-1.17448	0.598625	-0.335522	0.103687
173	13167	W33910	diazepam binding inhibitor	Dbi	0.935202	1.01033	1.18223	1.01195	1.08927	1.19528	1.05059	0.965029		-1.25799	-2.4299	0.733394	-2.41943	-0.739806	0.807661	-1.73953	-2.06598
174	385608	AI430677	similar to 40S ribosomal protein S10	na	1.01184	0.981323	1.11604	1.22596	1.20549	1.10955	1.41096	1.24999		-2.37993	-2.24306	0.57436	0.995241	0.988105	0.475374	0.999999	0.998489
175	56443	W34547	actin related protein 2/3 complex, subunit 1A	Arpc1a	0.991099	1.11884	1.09101	1.05959	1.16899	1.07314	1.04165	1.21839		-2.30907	0.992975	0.929075	0.424929	0.999933	0.749918	-0.390399	0.999999
176	14325	W34689	ferritin light chain 1	Ftl1	0.999673	1.00048	1.00023	1.00167	0.999997	0.999239	1.00024	0.999812		-2.46418	-2.46365	-2.46418	-2.45571	-2.46436	-2.46277	-2.46418	-2.46418
177	22784	W34988	solute carrier family 30 (zinc transporter), member 3	Slc30a3	1.18942	0.982874	1.03592	0.951194	1.18386	1.17026	1.12796	1.25198		0.703837	-2.37993	-2.11067	-1.79535	0.664848	0.54895	-0.0311237	0.937499
178	22378	W41126	WW domain binding protein 2	Wbp2	0.988633	1.0569	1.04633	0.964766	1.02661	0.990262	0.92541	1.10735		-2.26624	0.117918	-0.371986	-0.924171	-1.52491	-2.31903	0.749918	0.95649
179	107686	W41213	small nuclear ribonucleoprotein D2	Snrpd2	0.991453	1.0407	1.14524	1.18793	1.24337	1.33634	1.20254	1.39807		-2.37219	-0.924171	0.992546	0.999672	0.999995	1	0.999895	1
180	22174	W41438	TYRO3 protein tyrosine kinase 3	Tyro3	0.995714	1.07462	1.07183	1.04705	1.18776	1.1132	1.12723	1.23865		-2.44673	0.239199	0.159704	-0.841676	0.99839	0.866612	0.93589	0.999945
181	12812	W40627	coilin	Coil	1.15118	0.848111	0.996959	1.10553	1.14779	1.11205	0.767096	0.719261		-0.659571	-0.264096	-2.46277	-1.38236	-0.719632	-1.27881	0.72188	0.921613
182	15425	W33293	homeo box C6	Hoxc6	1.03342	1.12895	1.03927	1.02856	0.97194	1.02246	1.03788	1.08376		-0.659571	0.999301	-0.281761	-1.02816	-1.0073	-1.46425	-0.371986	0.942109
183	16158	W41820	interleukin 11 receptor, alpha chain 2	Il11ra2	0.975336	0.961214	0.959548	0.935225	0.942287	0.94707	0.944827	0.861953		-1.93693	-1.2996	-1.21627	-0.0787164	-0.390399	-0.60026	-0.503285	0.98228
184		W48168			0.989647	1.11181	1.03862	1.09833	1.09468	1.11042	1.21396	1.3912		-2.35574	0.850162	-1.27881	0.709956	0.65796	0.839467	0.999672	1
185	19730	W48230	ral guanine nucleotide dissociation stimulator	Ralgds	0.908174	0.980178	1.06335	1.05193	1.00064	1.00127	1.18778	1.50864		0.173331	-2.25479	-0.924171	-1.32036	-2.46418	-2.46365	0.952932	1
186	26559	W41683	hormonally upregulated Neu-associated kinase	Hunk	1.00341	0.772381	0.808158	0.790254	0.731997	0.802135	0.907043	1.08019		-2.458	0.999858	0.997578	0.999386	0.999996	0.99844	0.370926	-0.177764
187	66913	W46090	KDEL (Lys-Asp-Glu-Leu) endoplasmic reticulum protein retention receptor 2	Kdelr2	0.974961	1.18886	1.18516	0.919316	0.827504	0.927807	1.07286	1.05274		-2.31903	0.513238	0.475374	-1.15357	0.664848	-1.36174	-1.48455	-1.90261
188	66420	W45751	polymerase (RNA) II (DNA directed) polypeptide E	Polr2e	0.951652	0.960498	0.998262	1.04442	1.06767	1.01053	0.967804	1.05315		0.0747743	-0.427577	-2.458	-0.246562	0.643838	-2.26624	-0.924171	0.186807
189	69955	W45807	RIKEN cDNA 2810431B21 gene	2810431B21Rik	1.02791	0.990379	0.954774	0.966559	1.00947	0.98218	0.976575	1.07648		-0.986474	-2.23104	0.25192	-0.484195	-2.24306	-1.72063	-1.2996	0.917624
190	18582	W45989	phosphodiesterase 6D, cGMP-specific, rod, delta	Pde6d	1.02557	1.1168	1.07493	0.992362	1.09325	0.995606	1.03187	1.04945		-1.58478	0.979619	0.664848	-2.37219	0.892267	-2.43463	-1.19538	-0.19476
191	20692	W46030	secreted acidic cysteine rich glycoprotein	Sparc	1.00333	1.00162	1.16475	1.09691	1.03664	0.924374	1.09111	1.35658		-2.458	-2.46277	0.917624	0.173331	-1.77689	-0.211893	0.0302809	0.999986
192	21652	AI425579	PHD finger protein 1	Phf1	0.929352	0.946285	0.889175	0.819598	0.951037	0.88122	1.07889	1.03078		-0.503285	-1.15357	0.57436	0.987401	-1.34107	0.691278	-0.40893	-2.00317
193	21428	W61621	transcription factor-like 4	Tcfl4	1.00985	0.814297	1.05981	0.922609	0.986157	0.900557	1.03361	1.03325		-2.42484	0.969236	-1.2996	-0.580671	-2.37993	0.0747743	-2.03502	-2.03502
194	20525	W62486	solute carrier family 2 (facilitated glucose transporter), member 1	Slc2a1	1.01383	1.18539	0.972926	1.03202	0.904793	1.06173	1.24252	0.97629		-2.33801	0.980179	-1.98692	-1.84975	0.485045	-0.719632	0.998751	-2.09601
195	13353	W54234	DiGeorge syndrome critical region gene 6	Dgcr6	1.04804	0.850988	0.897275	0.921513	0.892107	1.01683	1.07841	1.04467		-0.882828	0.994125	0.839467	0.424929	0.884247	-2.20616	0.25192	-1.04903
196	15193	W53883	hepatoma-derived growth factor, related protein 2	Hdgfrp2	0.954802	0.847493	0.884582	0.838888	0.840381	0.849054	0.94951	0.917387		-0.317475	0.999876	0.992322	0.999957	0.999947	0.999853	-0.0311237	0.860232
197	21402	W53991	S-phase kinase-associated protein 1A	Skp1a	1.00997	0.983143	1.00421	1.05731	0.964557	1.16529	1.31206	1.19681		-2.38734	-2.24306	-2.45007	-0.699533	-1.56492	0.974575	0.999993	0.980179
198		W61383			1.04153	1.13277	0.977828	0.936641	0.983334	1.01615	0.991889	1.05064		-1.11174	0.951688	-1.98692	0.0151516	-2.18018	-2.20616	-2.39443	-0.679512
199	14608	W62391	G protein-coupled receptor 83	Gpr83	1.02206	0.8254	0.97272	0.964716	0.921417	0.963649	0.935495	0.907502		-1.97046	0.999787	-1.72063	-1.2996	0.557549	-1.23714	0.131998	0.650957
200	14287	W59651	folylpolyglutamyl synthetase	Fpgs	0.92551	0.968755	1.04206	1.07802	0.975963	1.14574	1.16393	1.01051		0.557549	-1.42344	-0.903478	0.503976	-1.81365	0.99029	0.997258	-2.32867
201	23994	W64075	DAZ associated protein 2	Dazap2	0.906769	0.76616	0.895857	0.948388	0.859639	0.842475	0.981039	0.953412		0.678286	0.999997	0.820171	-0.679512	0.983717	0.995655	-2.15315	-0.924171
202	15181	W62765	histone deacetylase 1	Hdac1	0.939389	0.945679	1.05825	1.03129	0.97392	0.971064	0.934486	1.04579		0.566019	0.348308	0.370926	-1.06992	-1.36174	-1.15357	0.57436	-0.177764
203	18472	W61996	platelet-activating factor acetylhydrolase, isoform 1b, beta1 subunit	Pafah1b1	0.914309	0.907902	0.902868	0.961543	0.896397	0.966398	1.01154	1.0565		0.875704	0.925428	0.950414	-0.76005	0.97164	-1.06992	-2.26624	0.0600927
204		W62708			0.971886	0.955614	0.887957	0.923952	0.902638	1.04544	1.02315	0.952544		-1.77689	-0.965672	0.909097	0.348308	0.780394	-1.58478	-2.00317	-0.821179
205	68398	W70782			0.964645	1.02423	0.900099	0.879636	0.932013	0.958495	1.05795	0.923492		-1.52491	-2.01921	0.733394	0.915562	-0.0627071	-1.23714	-0.619942	0.226327
206	15427	W64848	homeo box C9	Hoxc9	1.03794	0.969836	1.02359	1.05731	1.03919	1.09374	1.05002	1.01729		-1.11174	-1.46425	-1.84975	-0.144185	-1.04903	0.780394	-0.484195	-2.11067
207	17136	W76964	myelin-associated glycoprotein	Mag	0.926962	0.914467	0.856878	0.821973	0.872101	0.886286	0.887954	0.973958		-0.0468426	0.325103	0.965738	0.997083	0.913454	0.811911	0.798912	-1.98692
208	66416	W64426	NADH dehydrogenase (ubiquinone) 1 alpha subcomplex, 7 (B14.5a)	Ndufa7	1.00003	1.02129	0.887009	0.943837	0.909763	0.977447	1.08358	0.986592		-2.46436	-1.91986	0.978453	0.0302809	0.869706	-1.83178	0.684837	-2.23104
209	14252	W66775	flotillin 2	Flot2	0.949237	0.904963	0.814814	0.815736	0.825902	0.810153	0.962303	0.881004		0.0452614	0.9598	0.999999	0.999999	0.999995	0.999999	-0.699533	0.996269
210	19725	W70909	regulatory factor X, 2 (influences HLA class II expression)	Rfx2	0.972167	0.917615	0.992226	0.900188	0.871028	0.975928	1.0076	1.13206		-0.568992	0.78034	-0.975285	0.922533	0.990543	-0.675606	-0.975285	0.975387
211		W70994			1.03235	0.976354	1.11475	1.1018	1.00004	1.0279	1.19766	1.08859		-0.685734	-0.814937	0.72783	0.601176	-1.01198	-0.762635	0.988806	0.419162
212	13057	W74825	cytochrome b-245, alpha polypeptide	Cyba	0.952655	0.978811	0.957176	0.936035	0.876363	0.913661	1.02147	1.25216		-0.262862	-0.831237	-0.371617	0.160017	0.926089	0.594223	-0.839164	0.999619
213	54006	W71604	deformed epidermal autoregulatory factor 1 (Drosophila)	Deaf1	0.966762	0.931038	0.952894	0.927469	0.905631	0.94737	1.02185	0.996916		0.245265	0.96723	0.717306	0.978441	0.998759	0.824383	-0.347583	-0.994712
214	23850	W81981	cellular repressor of E1A-stimulated genes	Creg	1.02757	1.22318	1.29427	1.38028	1.2656	1.42815	1.58678	1.22991		-0.715459	0.999035	0.99998	1	0.999906	1	1	0.99932
215	14131	W82159	Fc receptor, IgG, low affinity III	Fcgr3	0.97605	1.04594	1.17461	1.01154	0.979987	0.861485	1.16213	1.66247		-0.771691	-0.299253	0.988489	-0.953764	-0.839164	0.977264	0.978441	1
216	57423	W82194	ATP synthase, H+ transporting, mitochondrial F0 complex, subunit f, isoform 2	Atp5j2	1.03002	1.04126	0.929342	0.993673	1.00695	1.01774	1.11415	0.987757		-0.407446	-0.033972	0.762271	-0.979013	-0.971363	-0.771691	0.976653	-1.01157
217	81489	W75670	DnaJ (Hsp40) homolog, subfamily B, member 1	Dnajb1	0.930302	1.10664	0.922393	1.08388	0.745414	1.00195	0.96671	1.10352		-0.347583	0.0820022	-0.214278	-0.214278	0.994834	-1.01157	-0.839164	0.0477123
218	26362	W78330	AXL receptor tyrosine kinase	Axl	0.896791	0.961089	0.928871	0.89636	0.804064	0.762763	1.0104	1.5246		0.683841	-0.55786	0.149056	0.689619	0.997552	0.99988	-0.979013	1
219	74173	W82973	RIKEN cDNA 1700012B15 gene	1700012B15Rik	0.955616	0.915256	0.944945	0.852629	0.827428	0.985997	0.884101	1.02553		-0.725138	-0.129531	-0.591022	0.677982	0.841851	-0.982547	0.335498	-0.921792
220	26431	W80023	G protein-coupled receptor kinase-interactor 2	Git2	0.803914	0.997228	0.879659	0.849047	0.8004	0.909134	1.03696	1.12005		0.999978	-1.00695	0.978441	0.998253	0.999949	0.851619	-0.359613	0.9459
221	13010	W78651	cystatin C	Cst3	1.01186	0.840404	0.930703	0.970665	0.901742	0.915073	0.991874	1.10861		-0.883453	0.999982	0.816964	-0.311362	0.982133	0.943198	-0.948894	0.981644
222	17955	W81759	nucleosome assembly protein 1-like 4	Nap1l4	0.986961	0.997631	0.987067	0.995176	0.967077	0.98963	1.06718	1.01915		-0.846939	-1.00695	-0.846939	-0.989025	-0.141593	-0.903394	0.74304	-0.675606
223	109979	W82798	ADP-ribosyltransferase 3	Art3	1.07815	0.833392	0.890763	0.893924	0.807223	0.827236	0.873108	0.94384		0.245265	0.989709	0.788951	0.757574	0.998198	0.99289	0.904614	-0.275001
224	15312	W83341	high mobility group nucleosomal binding domain 1	Hmgn1	0.922316	1.00806	0.93206	1.04599	0.944089	1.03854	0.895637	0.905165		0.587183	-0.979013	0.40116	-0.214278	0.115797	-0.407446	0.888296	0.81316
225	105988	W83574	extra spindle poles-like 1 (S. cerevisiae)	Espl1	0.967829	0.880929	0.936404	0.954297	0.888106	0.946674	1.04982	0.992201		-0.0815155	0.999341	0.820705	0.428035	0.998456	0.634656	0.479453	-0.938598
226	54405	W83104	NADH dehydrogenase (ubiquinone) 1 alpha subcomplex, 1	Ndufa1	1.01109	0.980382	0.932345	0.929896	0.92425	0.994279	0.941518	0.925281		-0.909701	-0.695754	0.74304	0.78034	0.845165	-0.982547	0.565542	0.835045
227	20778	W82738	scavenger receptor class B, member 1	Scarb1	0.952207	0.938861	0.891511	1.0597	0.736605	0.758802	0.997719	0.872718		-0.580047	-0.347583	0.445522	-0.43115	0.999341	0.997552	-1.01105	0.666019
228	67264	W83085	NADH dehydrogenase (ubiquinone) 1 beta subcomplex 8	Ndufb8	0.984417	1.01585	0.911896	0.964488	0.974984	1.03886	1.0509	0.981537		-0.806568	-0.806568	0.93436	-0.153674	-0.524032	-0.0815155	0.286147	-0.734697
229	12257	W82946	benzodiazepine receptor, peripheral	Bzrp	1.12427	0.955142	0.934438	0.880632	0.787176	0.892665	0.849944	1.0429		0.487718	-0.62344	-0.262862	0.594223	0.989416	0.445522	0.845165	-0.685734
230	26572	W83216	COP9 (constitutive photomorphogenic) homolog, subunit 3 (Arabidopsis thaliana)	Cops3	1.06163	0.96782	1.03216	0.952377	0.962884	1.08333	0.855827	0.97598		-0.202138	-0.725138	-0.734697	-0.419318	-0.634067	0.192505	0.927813	-0.846939
231	14419	W83304	galanin	Gal	0.950552	0.985951	0.933387	0.858821	0.842743	0.956882	0.911954	0.98638		-0.612722	-0.975285	-0.335529	0.711927	0.824383	-0.695754	0.0361798	-0.979013
232	14230	W84142	FK506 binding protein 10	Fkbp10	1.03369	1.13191	1.18601	1.2304	1.19394	1.27988	1.14927	1.03207		-0.262862	0.994194	0.999923	0.999998	0.99996	1	0.998456	-0.311362
233	15437	AI430412	homeo box D8	Hoxd8	0.929809	0.985562	0.880547	0.885884	0.94154	1.00681	0.977591	0.939348		0.683841	-0.862023	0.989416	0.983529	0.436821	-0.979013	-0.675606	0.487718
234	13136	W83988	decay accelerating factor 1	Daf1	0.861103	0.966559	0.981548	0.972729	0.913828	0.902156	1.0374	1.05251		0.93436	-0.665372	-0.903394	-0.780616	0.445522	0.62152	-0.612722	-0.311362
235	16391	W84302	interferon dependent positive acting transcription factor 3 gamma	Isgf3g	0.961173	0.887807	0.877652	0.875755	0.791672	0.841285	0.968812	0.927594		-0.335529	0.937433	0.96723	0.971202	0.999977	0.997833	-0.546654	0.527726
236		W87045			0.936754	0.978189	0.908487	0.96879	0.960217	1.01358	0.987431	1.00063		0.203199	-0.806568	0.717306	-0.612722	-0.395536	-0.933176	-0.943838	-1.01187
237	56612	W88132	prefoldin 5	Pfdn5	0.962123	0.970995	0.923391	0.979479	0.980326	1.00708	1.0838	1.03104		0.234857	-0.141593	0.957762	-0.524032	-0.55786	-0.948894	0.960833	-0.0934804
238	20643	W85296	small nuclear ribonucleoprotein E	Snrpe	0.967393	1.06731	0.986902	0.927554	0.851451	0.978951	0.933688	1.04149		-0.798056	-0.299253	-0.975285	-0.11749	0.845165	-0.921792	-0.23857	-0.695754
239	30926	W85535	thioredoxin-like 2	Txnl2	1.00179	1.08764	1.04304	1.13465	1.11372	1.11792	1.07859	1.14539		-1.01033	0.757574	-0.165771	0.979008	0.932775	0.9459	0.641096	0.988806
240	17000	W89254	lymphotoxin B receptor	Ltbr	1.06326	0.899628	0.856784	0.844191	0.779635	0.809317	0.885591	0.944773		0.0361798	0.88578	0.993847	0.997766	0.999995	0.999906	0.952159	0.149056
241	13043	W96939	cortactin	Cttn	0.997633	0.912078	0.972769	1.03768	0.962311	1.07896	1.17021	1.15006		-1.00368	0.99527	-0.0934804	0.315996	0.37352	0.971942	0.999999	0.999991
242	56717	AI325857	FK506 binding protein 12-rapamycin associated protein 1	Frap1	1.00547	0.961041	0.839816	0.889028	0.907907	0.921337	0.925559	1.05801		-0.979013	0.170913	0.999997	0.997962	0.984403	0.944563	0.918828	0.653725
243	18541	W89405	pericentrin 2	Pcnt2	1.18298	0.840511	1.18896	0.881369	0.927566	0.810768	0.828838	0.585022		0.419162	0.471101	0.462662	0.012971	-0.55786	0.706469	0.572843	0.999945
244	11520	W89846	adipose differentiation related protein	Adfp	0.89194	0.663487	0.687485	0.807231	0.870379	1.32178	1.15988	1.29162		-0.299253	0.988163	0.974058	0.550678	-0.0576765	0.835045	0.0361798	0.757574
245	54364	W89823	ribonuclease P2	Rnasep2	0.959657	0.970055	0.946494	0.867361	0.877071	0.984114	0.940065	1.02325		-0.501147	-0.715459	-0.202138	0.92433	0.880602	-0.921792	-0.0458065	-0.839164
246	12297	W90827	calcium channel, voltage-dependent, beta 3 subunit	Cacnb3	0.996717	0.910856	0.88454	0.944841	0.926117	0.979909	1.04081	1.01692		-1.00368	0.927813	0.991795	0.436821	0.797288	-0.705663	-0.0576765	-0.798056
247	21807	W96821	transforming growth factor beta 1 induced transcript 4	Tgfb1i4	0.936221	0.850068	1.1449	1.19743	1.10114	0.963288	1.16586	0.956067		-0.762635	0.0820022	-0.165771	0.234857	-0.524032	-0.927574	0.00129818	-0.890268
248	66596	W99934	general transcription factor III A	Gtf3a	1.00223	1.02076	1.01606	1.15717	1.08343	0.99211	1.05066	1.00409		-1.00695	-0.62344	-0.771691	0.99976	0.906768	-0.948894	0.40116	-0.994712
249	15417	W97853	homeo box B9	Hoxb9	0.958344	0.962127	0.864611	0.936385	0.980562	0.925967	1.02169	1.0323		-0.535377	-0.612722	0.897891	-0.0576765	-0.896915	0.160017	-0.876472	-0.734697
250	12015	W98547	Bcl-associated death promoter	Bad	0.993944	0.875855	0.890433	0.857739	0.904977	0.808716	0.960216	0.902599		-0.982547	0.996485	0.986403	0.999439	0.954476	0.999998	-0.033972	0.962767
251	22419	W91468	wingless-related MMTV integration site 5B	Wnt5b	0.997155	1.06504	1.05071	0.985696	0.884006	1.00174	1.02436	0.891605		-1.00828	0.170913	-0.165771	-0.921792	0.920699	-1.01033	-0.762635	0.880602
252	18971	W91387	polymerase (DNA directed), delta 1, catalytic subunit	Pold1	0.982455	0.982845	0.970731	1.05921	0.987849	0.984129	0.986388	1.0848		-0.789405	-0.798056	-0.44294	0.410204	-0.903394	-0.823161	-0.876472	0.816964
253	11765	AA002389	adaptor protein complex AP-1, gamma 1 subunit	Ap1g1	0.903414	1.00739	0.951275	0.940139	0.834039	0.781455	0.992482	0.908581		0.926089	-0.975285	0.126945	0.436821	0.999816	0.999999	-0.971363	0.895562
254	18673	AA000102	prohibitin	Phb	0.96327	1.02523	0.999797	1.04764	1.01427	1.14801	1.1205	1.05063		-0.165771	-0.580047	-1.01187	0.138032	-0.862023	0.997236	0.981143	0.224376
255	140858	AA000181	WD repeat domain 5	Wdr5	0.89723	0.958174	0.9846	1.02596	0.997037	0.87488	0.923607	0.968646		0.982133	0.0933242	-0.806568	-0.512621	-1.00368	0.997899	0.857847	-0.287132
256	20020	AA000244	polymerase (RNA) II (DNA directed) polypeptide A	Polr2a	1.00811	1.17249	0.998989	0.945243	0.879726	0.920484	0.996924	0.96921		-0.967249	0.998594	-1.01105	0.286147	0.985634	0.771448	-1.00542	-0.454683
257	11465	AA000327	actin, gamma, cytoplasmic	Actg	0.871138	0.934134	1.4689	1.3401	1.22888	0.845909	1.05414	1.00413		-0.23857	-0.789405	0.941803	0.757574	0.306126	0.012971	-0.876472	-1.01105
258	18632	AA003271	peroxisomal biogenesis factor 11b	Pex11b	0.943326	0.941293	0.987535	0.958501	0.934035	1.01588	1.04647	1.04469		0.775929	0.80929	-0.806568	0.382817	0.895562	-0.705663	0.479453	0.428035
259		AA051014			0.902929	0.953146	0.834452	0.724314	0.721348	0.867782	0.905281	0.833254		0.851619	-0.105473	0.998834	1	1	0.983972	0.835045	0.998939
260	17865	AA003042	myeloblastosis oncogene-like 2	Mybl2	0.901263	1.00465	0.924831	0.938784	0.859657	0.910666	1.09998	0.968667		0.906768	-0.999599	0.659913	0.37352	0.995407	0.835045	0.851619	-0.489614
261	19255	AA003599	protein tyrosine phosphatase, non-receptor type 2	Ptpn2	0.964973	0.977305	0.952604	0.952491	0.932228	0.918311	0.9006	0.936113		-0.190006	-0.612722	0.234857	0.245265	0.722607	0.88578	0.970445	0.653725
262	245474	AA008051	similar to DYSKERIN	na	0.971092	1.09863	1.0743	0.950244	1.01107	0.896884	0.97169	0.97351		-0.715459	0.580056	0.203199	-0.250717	-0.967249	0.747959	-0.734697	-0.762635
263	15893	AA008044	islet cell autoantigen 1	Ica1	0.976813	0.985229	1.00478	0.958213	0.920256	0.988061	1.00457	1.04514		-0.685734	-0.869328	-0.997256	-0.11749	0.766896	-0.921792	-0.999599	-0.0815155
264	56455	AA008134	dynein, cytoplasmic, light chain 1	Dnclc1	1.0205	1.29509	1.95796	1.90898	2.07897	1.71929	1.49515	1.45924		-1.00941	0.893186	1	0.999999	1	0.999965	0.997319	0.994523
265	22210	AA003956	ubiquitin-conjugating enzyme E2B, RAD6 homology (S. cerevisiae)	Ube2b	0.927666	0.884923	0.797064	0.903598	0.823008	1.02477	0.864906	0.991299		0.345127	0.88578	0.999677	0.72783	0.997552	-0.780616	0.960833	-0.982547
266	20744	AA014532	spermatid perinuclear RNA binding protein	Spnr	1.0346	1.0501	0.962204	0.897527	0.967309	0.946686	0.944661	1.01749		-0.478023	-0.0695802	-0.359613	0.893186	-0.501147	0.0820022	0.138032	-0.85456
267	21645	AA008471	t-complex-associated testis expressed 1	Tcte1	0.945499	0.89143	0.857725	0.82565	0.85844	0.881415	0.975339	0.944723		0.0477123	0.897891	0.987829	0.998939	0.987135	0.943198	-0.734697	0.0591946
268	85305	AA004176	lysyl-tRNA synthetase	Kars	0.984986	0.958695	0.996785	1.11995	1.04516	1.03818	1.06835	1.06302		-0.890268	-0.250717	-1.00695	0.920699	-0.202138	-0.383593	0.364138	0.245265
269	18991	AA014507	POU domain, class 3, transcription factor 1	Pou3f1	1.0418	0.952765	0.808525	0.8992	0.895674	0.969895	0.921655	0.985548		0.213823	0.454135	1	0.99348	0.995541	-0.190006	0.941803	-0.780616
270	18762	AA014771	protein kinase C, zeta	Prkcz	0.942551	0.836568	0.834946	0.852662	0.846488	0.789716	0.898189	0.89635		-0.214278	0.971202	0.974058	0.935913	0.952159	0.998253	0.601176	0.628131
271	14645	AA011759	glutamate-ammonia ligase (glutamine synthase)	Glul	1.25059	0.962987	1.01518	0.993647	0.704737	0.795091	0.720565	0.780646		0.695316	-0.903394	-0.994712	-1.00828	0.975387	0.722607	0.959833	0.797288
272	20115	AA014823	ribosomal protein S7	Rps7	0.942311	1.0175	1.23301	1.16424	1.36314	1.27037	1.37501	1.29123		-0.512621	-0.962943	0.929502	0.672042	0.997833	0.972664	0.998456	0.983972
273	110809	AA013943	splicing factor, arginine/serine-rich 1 (ASF/SF2)	Sfrs1	0.895893	0.863715	1.00657	1.19755	1.02672	1.06981	0.996301	1.03944		0.949737	0.996039	-0.982547	0.999726	-0.601915	0.527726	-1.00368	-0.23857
274	71904	AA015365	RIKEN cDNA 2310021M12 gene	2310021M12Rik	0.987332	0.983886	0.982062	0.997964	0.990716	1.01137	0.999656	1.01945		-0.831237	-0.734697	-0.665372	-1.00695	-0.915834	-0.869328	-1.01187	-0.62344
275	67782	AA015478			1.05844	0.971059	1.01996	1.0963	0.866771	0.953215	0.870112	1.04287		-0.734697	-0.933176	-0.975285	-0.359613	0.203199	-0.806568	0.170913	-0.85456
276	12424	AA016824	cholecystokinin	Cck	1.01316	0.977015	0.915107	0.946951	0.864444	0.905413	1.00189	0.872829		-0.938598	-0.789405	0.62152	-0.0576765	0.972664	0.747959	-1.01033	0.954476
277	16832	AA017955	lactate dehydrogenase 2, B chain	Ldh2	0.967993	1.0091	0.964069	0.840392	0.920311	0.997516	1.02124	0.969698		-0.655036	-0.982547	-0.568992	0.987135	0.419162	-1.00941	-0.85456	-0.695754
278	19988	AA014108	ribosomal protein L6	Rpl6	1.01247	0.990126	1.08724	1.14966	1.15718	1.30257	1.26445	1.19318		-0.915834	-0.948894	0.762271	0.992251	0.995129	1	0.999997	0.999538
279	15526	AA014915	heat shock protein, A	Hspa9a	0.871798	0.911383	0.976672	1.0154	1.07611	1.01704	1.04298	1.16013		0.677982	0.149056	-0.903394	-0.962943	-0.177882	-0.953764	-0.685734	0.762271
280		AA015216			1.00396	1.02073	0.928897	0.948377	0.940423	1.06734	0.970604	1.00582		-1.00695	-0.883453	0.115797	-0.311362	-0.141593	-0.0576765	-0.753449	-1.00174
281	53611	AA016379	vesicle transport through interaction with t-SNAREs homolog 1A (yeast)	Vti1a	0.956448	0.992147	0.962011	0.93284	0.885762	0.965642	0.965371	1.05847		-0.0458065	-0.971363	-0.226423	0.580056	0.977264	-0.347583	-0.335529	0.296175
282	17219	AA016759	minichromosome maintenance deficient 6 (MIS5 homolog, S. pombe) (S. cerevisiae)	Mcm6	0.84296	0.976136	0.88249	0.918249	0.626767	0.824316	0.809672	1.14079		0.888296	-0.890268	0.587183	0.0477123	1	0.947207	0.971942	0.653725
283	17776	AA016762	microtubule associated testis specific serine/threonine protein kinase	Mtssk	1.00241	1.01012	1.02935	1.05892	0.916386	0.90573	0.948126	0.937676		-1.00695	-0.933176	-0.44294	0.428035	0.883215	0.9459	0.325787	0.587183
284	15184	AA017742	histone deacetylase 5	Hdac5	1.03898	1.07387	1.0354	0.948826	0.857936	1.0484	1.20837	1.15645		-0.771691	-0.287132	-0.806568	-0.580047	0.72783	-0.655036	0.897891	0.672042
285		AA023906			1.0098	1.12491	1.16733	1.1903	1.33073	1.28463	1.16169	1.04056		-0.958448	0.954476	0.996039	0.999035	1	0.999998	0.994361	-0.262862
286	22359	AA020307	very low density lipoprotein receptor	Vldlr	1.15477	1.14551	1.00063	1.24556	1.46881	1.63806	1.7988	1.10462		0.354674	0.265858	-1.01187	0.845165	0.998456	0.999964	0.999999	-0.165771
287		AA023082			0.887007	0.928921	0.885089	0.846393	0.922078	0.828582	0.990087	1.14448		0.80929	0.192505	0.820705	0.974058	0.335498	0.991064	-0.979013	0.893186
288	22286	AA023614	undifferentiated embryonic cell transcription factor 1	Utf1	0.931296	0.990791	0.975523	0.801344	0.885181	0.890562	1.02219	1.15912		0.126945	-0.982547	-0.814937	0.998306	0.80929	0.766896	-0.85456	0.932775
289	16453	AA023670	Janus kinase 3	Jak3	0.964329	0.911623	1.06666	1.00529	0.956453	0.941393	1.01447	1.12848		-0.665372	0.392031	-0.11749	-1.00368	-0.512621	-0.202138	-0.953764	0.72783
290	20364	AA023745	selenoprotein W, muscle 1	Sepw1	0.959923	0.940767	0.951406	1.04296	0.945238	1.02076	0.98688	1.10357		0.00129818	0.572843	0.286147	0.0477123	0.462662	-0.685734	-0.869328	0.956691
291	12916	AA030254	cAMP responsive element modulator	Crem	1.04991	1.1793	0.999474	1.1713	1.14058	0.890424	0.941069	0.951365		-0.6446	0.775929	-1.01187	0.732976	0.511986	0.181743	-0.478023	-0.634067
292	22218	AA030059	ubiquitin-like 1	Ubl1	0.973619	1.22194	0.937863	1.01959	0.984381	0.965204	0.933542	1.11638		-0.535377	0.999987	0.558154	-0.744135	-0.831237	-0.262862	0.641096	0.970445
293	12144	AA030433	Bloom syndrome homolog (human)	Blm	0.92264	0.85751	0.882299	0.90223	0.946566	1.09046	0.951451	1.10725		0.511986	0.983972	0.926089	0.793154	-0.033972	0.608044	-0.165771	0.78468
294		AA032512			1.02036	0.984554	1.0097	0.980497	1.00267	0.949158	0.912102	0.996695		-0.685734	-0.806568	-0.933176	-0.695754	-1.00542	0.37352	0.937433	-1.00174
295	320499	AA027367			0.912977	1.0841	1.02447	0.917929	1.02014	0.925056	0.880102	0.985845		0.972664	0.935913	-0.44294	0.956691	-0.612722	0.918828	0.999227	-0.798056
296	12464	AA027583	chaperonin subunit 4 (delta)	Cct4	0.977103	1.04127	0.990389	0.995154	1.02089	1.06793	0.937688	1.10872		-0.862023	-0.580047	-0.985884	-1.00542	-0.890268	-0.0695802	-0.105473	0.565542
297	20085	AA030284	ribosomal protein S19	Rps19	1.00149	1.01027	1.15782	1.27246	1.26964	1.34484	1.3126	1.3295		-1.01105	-0.962943	0.983529	0.999977	0.999972	1	0.999998	0.999999
298	17256	AA028786	male enhanced antigen 1	Mea1	1.01007	1.01168	1.05881	1.0312	1.05461	1.02424	1.02542	1.09207		-0.876472	-0.831237	0.766896	-0.0576765	0.695316	-0.359613	-0.311362	0.984403
299	16828	AA028349	lactate dehydrogenase 1, A chain	Ldh1	1.13147	0.875038	1.28994	0.993372	1.13016	1.19481	1.07601	1.29826		0.012971	0.126945	0.888296	-1.00828	0.00129818	0.527726	-0.55786	0.902417
300	59069	AA032933	tropomyosin 3, gamma	Tpm3	0.96524	0.981132	0.983926	0.970933	1.08577	0.958983	0.997333	1.26752		-0.335529	-0.789405	-0.846939	-0.512621	0.762271	-0.141593	-1.00695	0.999998
301	11545	AA032357	ADP-ribosyltransferase (NAD+; poly (ADP-ribose) polymerase) 1	Adprt1	0.974709	0.978655	0.994169	1.05538	0.899326	0.969752	0.890463	0.893371		-0.43115	-0.580047	-0.975285	0.535464	0.989416	-0.23857	0.995797	0.994361
302	22117	AA032612	thiosulfate sulfurtransferase, mitochondrial	Tst	0.942217	1.01815	0.993915	1.06486	0.929589	0.958267	0.895963	0.952187		0.0477123	-0.876472	-0.994712	0.126945	0.345127	-0.359613	0.831552	-0.202138
303	51810	AA032558	heterogeneous nuclear ribonucleoprotein U	Hnrpu	0.975836	1.13092	1.01027	1.01416	0.966172	0.832675	0.935353	1.06284		-0.753449	0.92433	-0.962943	-0.921792	-0.535377	0.997625	0.265858	0.138032
304	17096	AA032394	Yamaguchi sarcoma viral (v-yes-1) oncogene homolog	Lyn	0.972121	1.07025	0.99969	0.953202	0.904099	0.975964	1.02023	1.28866		-0.371617	0.762271	-1.01187	0.315996	0.977264	-0.512621	-0.655036	1
305	12442	AA033463	cyclin B2	Ccnb2	0.952825	1.03398	1.02044	0.96161	0.859809	0.925812	0.891739	1.14093		-0.601915	-0.806568	-0.933176	-0.734697	0.762271	-0.129531	0.428035	0.608044
306	381799	AA033337	similar to Translationally controlled tumor protein (TCTP) (p23) (21 kDa polypeptide) (p21) (Lens epithelial protein)	na	1.02971	1.04463	1.09076	1.09155	0.973941	0.983025	1.0908	1.04275		-0.771691	-0.512621	0.335498	0.354674	-0.814937	-0.927574	0.335498	-0.546654
307	229663	AA033352	DNA segment, Chr 3, MJeffers 1	D3Jfr1	1.07658	1.11458	1.06498	1.09514	1.20319	1.08777	1.07813	1.16812		0.40116	0.845165	0.170913	0.672042	0.997833	0.580056	0.428035	0.986403
308	12626	AA033392	centrin 3	Cetn3	1.01944	0.999977	0.983067	1.00936	1.04548	1.01093	0.992741	1.19816		-0.62344	-1.01198	-0.695754	-0.915834	0.345127	-0.876472	-0.948894	0.999999
309	69953	AA034754	RIKEN cDNA 2810025M15 gene	2810025M15Rik	1.01798	0.981174	1.01369	0.909031	0.894959	0.983307	0.891068	1.12752		-0.962943	-0.953764	-0.982547	0.0245988	0.245265	-0.967249	0.296175	0.354674
310	18002	AA014342	neural precursor cell expressed, developmentally down-regulated gene 8	Nedd8	1.0058	1.05047	1.06685	1.00428	1.0637	0.959321	0.98105	1.11824		-0.962943	0.666019	0.902417	-0.982547	0.875225	0.445522	-0.524032	0.99942
311	17128	AA030901	MAD homolog 4 (Drosophila)	Madh4	1.0168	1.03177	1.04503	0.93408	1.04749	0.927831	0.868021	0.967219		-0.921792	-0.715459	-0.478023	0.0361798	-0.43115	0.170913	0.902417	-0.685734
312	20832	AA030906	signal sequence receptor, delta	Ssr4	1.01876	0.972676	1.1084	1.04625	1.01163	0.981882	0.987826	0.997497		-0.789405	-0.546654	0.931155	-0.0104178	-0.921792	-0.798056	-0.909701	-1.00828
313	68776	AA034616	TAF11 RNA polymerase II, TATA box binding protein (TBP)-associated factor	Taf11	0.897383	1.01649	0.935979	1.02973	0.981797	1.03149	1.03731	1.06928		0.984824	-0.780616	0.706469	-0.359613	-0.725138	-0.299253	-0.0934804	0.722607
314	20044	AA015188	ribosomal protein S14	Rps14	1.07131	0.97422	1.05252	1.16228	1.05873	1.18877	1.23975	1.25385		0.296175	-0.725138	-0.11749	0.981143	0.0245988	0.994984	0.999687	0.999854
315	15191	AA015083	hepatoma-derived growth factor	Hdgf	0.992494	1.1491	0.981974	1.03797	1.04478	1.01124	1.01128	1.05876		-0.979013	0.989994	-0.814937	-0.323454	-0.129531	-0.938598	-0.938598	0.245265
316	14254	AA014250	FMS-like tyrosine kinase 1	Flt1	0.922356	0.986666	0.906217	0.917517	0.838353	0.882432	0.946562	0.944595		0.835045	-0.869328	0.9459	0.880602	0.999923	0.992683	0.382817	0.436821
317	19921	AA035973	ribosomal protein L19	Rpl19	1.3337	0.90437	1.11361	1.07534	1.12695	1.19161	1.14027	1.15794		0.944563	-0.262862	-0.177882	-0.580047	-0.0458065	0.495895	0.0820022	0.245265
318	54401	AA039002	tyrosine 3-monooxygenase/tryptophan 5-monooxygenase activation protein, beta polypeptide	Ywhab	1.01218	1.1681	1.08943	0.969558	1.09149	1.04199	1.01789	1.04225		-0.909701	0.998759	0.831552	-0.43115	0.848421	-0.105473	-0.798056	-0.105473
319		AA041636			0.974807	0.958267	1.06399	0.916495	1.03928	0.945651	1.05097	1.15764		-0.655036	-0.165771	0.354674	0.775929	-0.287132	0.203199	0.0361798	0.993666
320	22057	AA036170	transducer of ErbB-2.1	Tob1	0.799723	0.98198	0.614139	0.621759	0.681466	0.786092	0.798613	0.896998		0.869644	-0.975285	0.999967	0.999949	0.998719	0.914968	0.875225	-0.0221752
321	58803	AA038137	RIKEN cDNA 1110035E17 gene	1110035E17Rik	0.984933	1.00938	1.03672	1.08257	1.13776	1.16203	1.07399	1.20985		-0.771691	-0.915834	0.00129818	0.920699	0.999176	0.999915	0.857847	0.999999
322	12874	AA038455	carboxypeptidase D	Cpd	0.942622	1.06891	1.03571	0.905521	0.991709	0.933524	1.06562	1.12845		-0.0576765	0.115797	-0.601915	0.659913	-0.985884	0.160017	0.0477123	0.851619
323	19170	AA039189	proteasome (prosome, macropain) subunit, beta type 1	Psmb1
324	11758	AA039135	peroxiredoxin 6	Prdx6	1.10236	1.00001	0.915427	1.00069	1.03271	1.00981	1.01364	0.866354		0.535464	-1.01198	0.40116	-1.01187	-0.705663	-0.982547	-0.953764	0.906768
325	15463	AA049862	HIV-1 Rev binding protein	Hrb	0.936175	1.00011	0.951623	0.976621	0.989637	0.90308	1.04926	1.08553		0.683841	-1.01198	0.306126	-0.580047	-0.915834	0.969669	0.255599	0.877939
326	70533	AA041651	RIKEN cDNA 4632412E09 gene	4632412E09Rik	0.97238	0.985748	0.973757	1.10574	1.06718	1.01412	1.06865	1.1298		-0.43115	-0.839164	-0.478023	0.966379	0.659913	-0.846939	0.689619	0.994023
327	15893	AA041785	islet cell autoantigen 1	Ica1	1.02208	0.984097	0.944385	1.03731	1.05679	0.930739	1.05145	1.11223		-0.883453	-0.938598	-0.275001	-0.665372	-0.323454	0.012971	-0.419318	0.565542
328		AA050086			0.953231	1.00448	1.01681	1.03344	0.928962	0.880514	1.01509	1.05215		0.454135	-0.989025	-0.715459	-0.0815155	0.897891	0.999341	-0.762635	0.535464
329	19684	AA050683	radixin	Rdx	0.958419	0.985561	0.752254	0.86196	0.778413	0.757786	0.733227	0.912982		-0.214278	-0.896915	1	0.992251	0.999997	1	1	0.78468
330		AA049474			1.05518	1.03608	1.02145	1.0476	1.00472	1.03888	1.06185	1.12561		0.565542	-0.0221752	-0.580047	0.364138	-0.989025	0.0820022	0.695316	0.997476
331	19242	AA049699	pleiotrophin	Ptn	1.04555	0.970051	1.05612	1.04476	1.10142	1.07464	1.09916	1.15123		-0.0104178	-0.454683	0.286147	-0.033972	0.91095	0.659913	0.897891	0.99592
332	20463	AA050684	cytochrome c oxidase subunit VIIa polypeptide 2-like	Cox7a2l	1.04415	1.03732	1.09711	1.05888	1.00972	1.02833	1.083	1.16334		-0.466379	-0.601915	0.511986	-0.165771	-0.979013	-0.762635	0.296175	0.9459
333	15289	AA050755	high mobility group box 1	Hmgb1	1.01169	1.08136	1.02504	0.94794	0.941868	0.952218	0.922404	1.05867		-0.915834	0.775929	-0.601915	0.296175	0.454135	0.170913	0.805356	0.382817
334		AA050665			1.00366	1.12656	1.13692	1.04182	1.15624	1.10361	1.22715	1.33763		-1.00368	0.950962	0.971942	-0.262862	0.990273	0.851619	0.999876	1
335	78038	AA050443	RIKEN cDNA 4930552N12 gene	4930552N12Rik	0.989295	1.0183	1.04353	1.08658	1.13596	1.11883	1.0672	1.07469		-0.876472	-0.6446	0.315996	0.958809	0.999522	0.997552	0.827999	0.897891
336	67186	AA047991	ribosomal protein, large P2	Rplp2	0.982089	1.01773	1.17584	1.19888	1.1817	1.19452	1.31323	1.19977		-0.921792	-0.927574	0.929502	0.96723	0.941803	0.961811	0.999594	0.968875
337	12585	AI385804	cerebellar degeneration-related 2	Cdr2	0.952701	0.94035	0.914262	1.09599	1.10097	1.03142	0.954865	0.963137		-0.23857	0.0820022	0.445522	0.634656	0.689619	-0.6446	-0.287132	-0.501147
338	15211	AA050045	hexosaminidase A	Hexa	1.043	1.12562	1.04762	1.13146	1.09344	1.12076	1.28236	1.62993		-0.190006	0.957762	-0.0576765	0.969669	0.793154	0.9459	0.999998	1
339	12859	AA049270	cytochrome c oxidase, subunit Vb	Cox5b	1.00836	1.04106	0.973744	1.21241	1.08506	1.01698	1.03701	0.945088		-0.997256	-0.675606	-0.85456	0.958809	0.0477123	-0.948894	-0.734697	-0.407446
340	19942	AA049235	ribosomal protein L27	Rpl27	0.969969	1.01052	1.07351	1.19116	1.17142	1.27067	1.25648	1.21081		-0.512621	-0.943838	0.565542	0.999401	0.997833	0.999997	0.999993	0.999839
341	20422	AI323052	split hand/foot deleted gene 1	Shfdg1	1.00449	0.989683	0.983918	1.06215	1.06221	1.06747	0.961273	1.09522		-0.991968	-0.915834	-0.780616	0.614825	0.614825	0.706469	0.0245988	0.9459
342	22433	AA049245	X-box binding protein 1	Xbp1	0.970574	1.01314	1.1592	1.21956	1.13231	0.821264	0.840364	1.33029		-0.883453	-0.985884	0.572843	0.866775	0.325787	0.860877	0.757574	0.990273
343	14768	AA059861	LanC (bacterial lantibiotic synthetase component C)-like	Lancl1	0.979846	1.03275	1.01525	0.966026	0.950833	0.992999	0.96891	1.24199		-0.869328	-0.675606	-0.933176	-0.634067	-0.287132	-0.994712	-0.685734	0.998503
344	84095	AA059952	phosphatidylinositol 4-kinase type 2 alpha	Pi4k2a	0.951204	0.82595	0.910706	0.92911	0.945754	0.915657	0.996074	0.963513		-0.0815155	0.999202	0.752804	0.462662	0.0706251	0.689619	-1.00368	-0.43115
345	17748	AA051654	metallothionein 1	Mt1	0.749597	0.705322	0.697177	0.503178	1.05581	0.516723	0.543798	1.01625		0.203199	0.479453	0.5199	0.984403	-0.943838	0.978441	0.959833	-1.00542
346	14681	AA051709	guanine nucleotide binding protein, alpha o	Gnao	0.959599	1.02124	0.990944	0.841134	0.924929	0.944143	0.995861	1.08111		-0.287132	-0.753449	-0.967249	0.997833	0.572843	0.138032	-1.00368	0.572843
347	114896	AI385819	AFG3(ATPase family gene 3)-like 1 (yeast)	Afg3l1	0.994696	1.07508	1.03168	1.01933	1.09926	1.01751	0.924388	1.11845		-0.971363	0.937433	-0.0221752	-0.55786	0.993092	-0.62344	0.955596	0.999035
348	76709	AA064058	actin related protein 2/3 complex, subunit 2	Arpc2	1.03979	1.12062	1.03909	1.07876	1.15137	1.04739	1.05416	1.10442		-0.371617	0.906768	-0.395536	0.511986	0.979562	-0.177882	-0.0104178	0.81316
349	26457	AA059983	solute carrier family 27 (fatty acid transporter), member 1	Slc27a1	0.949078	1.00026	0.824487	0.766027	0.801431	0.793844	0.905126	0.977154		-0.287132	-1.01198	0.992251	0.99988	0.998306	0.999004	0.594223	-0.839164
350		AA087137			1.02895	1.12268	1.02365	1.10524	1.12887	1.20475	1.33166	1.28414		-0.580047	0.952159	-0.705663	0.883215	0.965507	0.999677	1	0.999998
351		AA060906			0.98336	1.05405	1.03434	1.12297	0.997495	1.02893	1.07753	1.12117		-0.862023	0.0591946	-0.466379	0.938921	-1.00828	-0.601915	0.558154	0.93436
352	14595	AA079961	UDP-Gal:betaGlcNAc beta 1,4- galactosyltransferase, polypeptide 1	B4galt1	1.05567	1.34185	1.11581	1.0447	1.09048	0.950111	1.01632	1.12591		-0.0221752	0.999999	0.857847	-0.299253	0.628131	-0.105473	-0.890268	0.906768
353	22388	AA097808	WD repeat domain 1	Wdr1	0.923771	0.9724	1.11529	1.14662	1.18331	0.967004	1.02402	1.19702		-0.190006	-0.883453	0.245265	0.558154	0.788951	-0.831237	-0.921792	0.845165
354	14077	AA098541	fatty acid binding protein 3, muscle and heart	Fabp3	0.749062	0.778207	0.753753	0.679548	0.930446	0.637451	0.736224	1.03451		0.689619	0.511986	0.666019	0.922533	-0.780616	0.97337	0.752804	-0.958448
355	50878	AA097991	stromal antigen 3	Stag3	0.944143	0.998287	0.994118	1.02637	1.06135	0.980654	1.10907	1.20829		0.608044	-1.00941	-0.975285	-0.43115	0.647452	-0.655036	0.985634	0.999998
356	56012	AA063766	phosphoglycerate mutase 2	Pgam2	0.992499	1.03652	0.974922	0.94654	1.02881	0.936609	1.01039	1.02695		-0.967249	-0.226423	-0.568992	0.364138	-0.466379	0.601176	-0.927574	-0.524032
357	108143	AA108210	TAF9 RNA polymerase II, TATA box binding protein (TBP)-associated factor	Taf9	1.01401	0.988877	1.13632	1.11246	1.10717	0.921575	0.88378	1.07322		-0.915834	-0.948894	0.957762	0.87246	0.838478	0.614825	0.947207	0.419162
358		AI325672			0.845304	1.00131	0.942232	0.99862	0.99966	1.02311	1.00396	1.00181		0.857847	-1.01157	-0.419318	-1.01157	-1.01198	-0.909701	-1.00941	-1.01105
359	19941	AA089242	ribosomal protein L26	Rpl26	1.09034	1.09666	1.17047	1.13174	1.16888	1.14239	1.29969	1.19181		0.160017	0.255599	0.877939	0.653725	0.87246	0.738046	0.998357	0.93436
360	320184	AI325749	RIKEN cDNA C330018J07 gene	C330018J07Rik	0.954931	0.988637	1.2678	1.21271	0.909662	1.02112	1.17605	1.18202		-0.839164	-0.999599	0.801355	0.572843	-0.371617	-0.975285	0.335498	0.382817
361	18263	AA117848	ornithine decarboxylase, structural	Odc	0.922401	1.06586	1.28105	1.21122	1.03815	0.965245	0.910344	1.08625		0.00129818	-0.299253	0.992251	0.952159	-0.725138	-0.753449	0.224376	0.0361798
362	22187	AA117928	ubiquitin B	Ubb	1.12576	1.11926	1.05323	1.22087	1.02029	1.14987	1.14577	1.06263		0.677982	0.62152	-0.407446	0.984824	-0.903394	0.835045	0.816964	-0.226423
363	21778	AA119696	testis expressed gene 9	Tex9	0.922572	0.979248	0.971027	0.931872	0.878322	0.945601	0.897826	1.11996		0.149056	-0.896915	-0.789405	-0.033972	0.771448	-0.323454	0.558154	0.62152
364	66105	AA123113	ubiquitin-conjugating enzyme E2D 3 (UBC4/5 homolog, yeast)	Ube2d3	0.971217	1.04302	0.955844	1.01255	1.0102	0.980783	0.936992	1.03196		-0.323454	0.149056	0.255599	-0.862023	-0.909701	-0.665372	0.732976	-0.23857
365	19164	AA162310	presenilin 1	Psen1	0.958833	1.03264	0.975941	1.10752	1.00894	1.00967	0.970131	1.1615		0.558154	0.181743	-0.190006	0.999251	-0.876472	-0.85456	0.0933242	0.999999
366	73834	AA109695	ATPase, H+ transporting, V1 subunit D	Atp6v1d	1.02641	0.955093	0.975164	0.983264	0.957187	0.914998	0.933297	0.942534		-0.419318	0.306126	-0.454683	-0.734697	0.234857	0.95333	0.805356	0.647452
367	57320	AA108826	Parkinson disease (autosomal recessive, early onset) 7	Park7	1.03664	1.0304	1.07394	1.04538	1.04312	1.11442	1.0669	1.02713		-0.655036	-0.753449	0.0591946	-0.489614	-0.535377	0.647452	-0.0695802	-0.806568
368	22340	AI326671	vascular endothelial growth factor B	Vegfb	1.01211	0.998731	1.0446	1.08616	1.12265	1.17874	1.20008	1.15769		-0.948894	-1.01105	-0.323454	0.535464	0.877939	0.990543	0.990273	0.974058
369	11677	AA108357	aldo-keto reductase family 1, member B3 (aldose reductase)	Akr1b3	1.01501	1.05864	1.05541	1.02392	1.07179	1.03912	0.954505	1.15377		-0.903394	0.10459	0.0245988	-0.744135	0.382817	-0.395536	-0.165771	0.981644
370	103694	AA109932	RIKEN cDNA 1110014L17 gene	1110014L17Rik	1.01268	1.02786	1.08456	1.07434	1.08418	1.0112	1.02183	1.05935		-0.862023	-0.383593	0.90888	0.824383	0.906768	-0.890268	-0.591022	0.594223
371	76281	AA111643	RIKEN cDNA 1300011C24 gene	1300011C24Rik	0.92427	1.07467	1.11065	1.13218	1.16429	1.11108	0.931901	1.2269		0.700932	0.594223	0.926089	0.977859	0.996974	0.927813	0.445522	0.999957
372	16201	AA108959	interleukin enhancer binding factor 3	Ilf3	0.954302	1.14805	1.47036	1.28926	1.37211	1.1124	1.36224	1.14067		-0.715459	0.471101	0.999726	0.971202	0.996378	0.0933242	0.995407	0.40116
373	67003	AA108590	RIKubiquinol cytochrome c reductase core protein 2	Uqcrc2	0.993709	1.14218	1.10056	1.04103	0.99989	0.996627	1.14252	1.22723		-1.00695	0.392031	-0.0695802	-0.798056	-1.01198	-1.01033	0.40116	0.87246
374	26442	AA110250	proteasome (prosome, macropain) subunit, alpha type 5	Psma5	1.01791	1.08871	1.14984	1.13597	1.11246	1.08122	1.22325	1.21031		-0.876472	0.565542	0.960833	0.927813	0.81316	0.454135	0.999035	0.998083
375	67680	AA108475	succinate dehydrogenase complex, subunit B, iron sulfur (Ip)	Sdhb	1.04709	1.08576	0.9746	0.995098	0.98746	1.01221	1.14827	1.17578		-0.780616	-0.359613	-0.938598	-1.00941	-0.994712	-0.994712	0.325787	0.543115
376		AA111722			0.910298	1.17026	1.01084	1.07315	0.863721	0.904223	0.97002	1.03689		0.0591946	0.747959	-0.991968	-0.311362	0.672042	0.160017	-0.85456	-0.798056
377	56752	AA109914	aldehyde dehydrogenase 9, subfamily A1	Aldh9a1	1.20517	1.27472	1.01318	0.977829	1.07164	1.06076	1.07477	1.17372		0.835045	0.966379	-0.985884	-0.938598	-0.407446	-0.546654	-0.359613	0.689619
378	13427	AA118591	dynein, cytoplasmic, intermediate chain 2	Dncic2	1.01071	1.06289	0.973223	0.978411	1.01976	0.978153	0.982865	1.12718		-0.909701	0.601176	-0.44294	-0.62344	-0.695754	-0.612722	-0.762635	0.993666
379	84092	AA119665	ubiquitin specific protease 8	Usp8	0.997124	1.02222	0.937203	0.933658	0.986248	0.847738	0.894233	1.0817		-1.00174	-0.489614	0.835045	0.875225	-0.789405	0.999996	0.997766	0.944563
380	19286	AA117045	6-pyruvoyl-tetrahydropterin synthase	Pts	0.990396	1.00075	0.892537	0.903575	0.956613	0.969902	1.00702	1.06617		-0.604926	-0.674858	0.992768	0.979507	0.318707	-0.0817772	-0.63796	0.736762
381	18813	AA110641	proliferation-associated 2G4	Pa2g4	1.02688	1.1389	1.35499	1.24528	1.20316	1.06386	1.03134	1.1629		-0.31557	0.991187	1	0.999995	0.999897	0.538333	-0.211191	0.998196
382	67870	AA119312	RIKEN cDNA 2310057D15 gene	2310057D15Rik	1.00569	1.03878	1.0728	0.969939	1.11994	0.958903	1.02083	1.08932		-0.644651	0.2638	0.886642	0.00918397	0.997404	0.380201	-0.31557	0.965704
383		AI510635			0.914384	1.21895	1.8195	1.37097	1.47423	1.07862	1.82731	1.15968		-0.230624	0.613221	0.999974	0.953843	0.991187	-0.342775	0.999977	0.273082
384	69192	AA119035	DEAH (Asp-Glu-Ala-His) box polypeptide 16	Dhx16	1.04834	1.05118	1.14227	1.06866	1.13053	0.973367	0.980161	1.04843		0.690376	0.746316	0.999934	0.9355	0.9999	0.0494929	-0.220929	0.695809
385	27406	AA125260	ATP-binding cassette, sub-family F (GCN20), member 3	Abcf3	0.924906	0.931482	1.1041	1.09102	0.986427	0.912839	1.06303	1.03945		0.726937	0.632112	0.902763	0.820722	-0.579399	0.853779	0.454743	-0.0615841
386		AI530746			0.954389	0.971182	0.912573	0.916416	0.884446	0.973169	1.01377	1.01184		0.148922	-0.287767	0.862656	0.827777	0.977827	-0.333778	-0.579399	-0.604926
387	16842	AA119479	lymphoid enhancer binding factor 1	Lef1	1.03984	0.931037	0.991089	1.07534	0.873311	0.934202	0.983062	1.01017		-0.0817772	0.600262	-0.63796	0.619591	0.986655	0.545505	-0.537789	-0.626733
388	14651	AA125236	hydroxyacyl glutathione hydrolase	Hagh	1.03033	1.01756	0.893976	0.949711	0.827762	0.8832	0.971445	0.946856		-0.459947	-0.595151	0.750992	-0.111981	0.989581	0.834605	-0.467596	-0.0514769
389	50995	AA123862	ubiquitin-like 1 (sentrin) activating enzyme E1B	Uble1b	1.01729	0.960424	1.01999	1.09378	0.954813	0.9677	0.996044	0.965019		-0.55643	-0.111981	-0.51799	0.760146	0.019278	-0.278377	-0.668295	-0.220929
390	229906	AA120690	general transcription factor IIB	Gtf2b	0.911464	1.05255	1.02352	1.07238	0.914942	0.900027	0.963194	1.05279		0.850717	0.216672	-0.428316	0.58701	0.817108	0.922374	-0.111981	0.226189
391		TRZ502			1.06713	1.20218	1.21454	1.2749	0.962351	1.0199	0.998513	0.931639		0.187867	0.991669	0.995166	0.999693	-0.297097	-0.56819	-0.674431	0.119363
392	66419	AA125287	mitochondrial ribosomal protein L11	Mrpl11	0.959565	0.972851	1.00995	1.09578	0.998373	1.02306	1.0911	1.10441		0.397221	-0.0514769	-0.579399	0.984717	-0.672127	-0.220929	0.97724	0.992768
393	22272	AA125131	RIKEN cDNA 1500040F11 gene	1500040F11Rik	1.03783	0.961142	1.04657	1.07956	0.943794	0.920192	0.990056	0.84459		-0.333778	-0.287767	-0.268931	0.354204	0.0394344	0.454743	-0.647755	0.978401
394	15356	AA125224	3-hydroxy-3-methylglutaryl-Coenzyme A lyase	Hmgcl	0.986517	0.943871	0.941539	0.977788	0.90475	1.00739	1.06653	0.981688		-0.600112	0.2638	0.30969	-0.475136	0.844434	-0.653476	0.388742	-0.537789
395	21841	AA117605	cytotoxic granule-associated RNA binding protein 1	Tia1	1.01044	0.993003	1.02517	0.959513	1.12225	1.02636	0.945795	1.01004		-0.63796	-0.658541	-0.467596	-0.17186	0.884164	-0.452193	0.119363	-0.641386
396	18607	AA117492	3-phosphoinositide dependent protein kinase-1	Pdpk1	0.959812	1.42251	1.11076	1.06616	0.966251	1.05083	1.18587	1.29874		-0.287767	0.999999	0.690376	0.119363	-0.386613	-0.142029	0.976023	0.9998
397	12465	AA120241	chaperonin subunit 5 (epsilon)	Cct5	0.968586	1.01227	1.00899	0.83857	1.03866	1.02741	1.09047	0.893901		-0.403567	-0.630632	-0.650697	0.988039	-0.306366	-0.475136	0.538333	0.798153
398		AI386097			0.994684	0.977571	0.990714	1.00318	0.992517	1.00248	0.932808	0.964049		-0.656091	-0.369318	-0.618468	-0.668295	-0.63796	-0.671019	0.736762	0.00918397
399	21672	AA117023	peroxiredoxin 2	Prdx2	0.991594	0.971921	0.876078	0.973469	0.921442	0.976127	1.06444	1.0053		-0.590044	0.0595358	0.99994	-0.000918	0.979507	-0.101927	0.881641	-0.641386
400		AA137762			1.03423	1.02119	1.01835	1.04109	0.923131	0.981403	1.04691	0.921566		-0.287767	-0.511143	-0.550348	-0.151999	0.606778	-0.544133	-0.0312517	0.625888
401	20924	AA137833	suppressor of Ty 5 homolog (S. cerevisiae)	Supt5h	0.911942	0.999702	1.06436	1.02049	0.918025	0.869878	1.05857	0.960246		0.978401	-0.675115	0.790147	-0.333778	0.962096	0.9998	0.706464	0.318707
402	12301	AA123692	calcyclin binding protein	Cacybp	1.04457	1.07478	1.0693	1.08817	1.02603	1.01502	1.02882	0.97918		-0.25943	0.216672	0.1391	0.413985	-0.51799	-0.618468	-0.482566	-0.56819
403	21767	AA122430	testis expressed gene 264	Tex264	1.01013	1.00455	0.886399	0.956315	0.938734	0.93706	1.03289	1.01158		-0.579399	-0.656091	0.998934	0.470572	0.820722	0.841212	0.0895523	-0.550348
404	68067	AA123801	RIKEN cDNA 3010026O09 gene	3010026O09Rik	0.942133	1.03922	0.956886	1.01845	0.973429	1.11226	1.03406	0.94406		-0.240274	-0.475136	-0.42016	-0.626733	-0.573864	0.345418	-0.524715	-0.268931
405	12349	AA122925	carbonic anhydrase 2	Car2	0.941335	1.44758	1.46728	1.86775	1.39389	1.32642	1.68164	2.43742		-0.122017	0.999989	0.999994	1	0.999921	0.999144	1	1
406	14433	AA122891	glyceraldehyde-3-phosphate dehydrogenase	Gapd	1.04076	0.923447	0.993014	0.964315	0.940111	1.03283	0.930025	0.885561		-0.324708	0.336572	-0.662944	-0.378007	0.0394344	-0.436375	0.216672	0.794181
407	56434	AA153003	transmembrane 4 superfamily member 8	Tm4sf8	0.956457	1.03191	0.964695	0.975638	0.838546	1.00668	0.934231	1.05351		-0.497088	-0.584793	-0.55643	-0.618468	0.695809	-0.671019	-0.287767	-0.436375
408	21917	AI386176	thymopoietin	Tmpo	1.02699	1.15484	1.15301	1.0571	0.891537	0.867483	0.983074	1.08281		-0.436375	0.972006	0.969777	0.129246	0.884164	0.969	-0.573864	0.552604
409	56398	AA137748	RIKEN cDNA 1500003O03 gene	1500003O03Rik	1.00296	1.05443	1.05024	0.952315	0.959577	0.960671	1.13572	1.00712		-0.673066	-0.122017	-0.181745	-0.191596	-0.31557	-0.324708	0.820722	-0.662944
410	12215	AA145723	basigin	Bsg	1.09722	1.04575	1.0961	1.1962	1.0518	1.19712	1.41037	1.41341		0.545505	-0.230624	0.531089	0.982049	-0.132034	0.982983	0.999998	0.999999
411	11951	AA139793	ATP synthase, H+ transporting, mitochondrial F0 complex, subunit c (subunit 9), isoform 1	Atp5g1	1.02576	1.00351	1.02599	1.00258	0.906334	0.951407	1.04132	0.928908		-1.29553	-1.4165	-1.29553	-1.41736	-0.117145	-0.976873	-1.11876	-0.561753
412	67857	AA146157	protein phosphatase 6, catalytic subunit	Ppp6c	0.943433	0.98893	0.914715	0.935359	0.911379	0.913438	1.00083	0.975062		0.0549847	-1.33657	0.7198	0.291042	0.761221	0.73596	-1.41798	-1.02632
413		AA152636			1.00804	0.929152	1.06806	1.15073	1.0455	1.13684	1.1643	1.19828		-1.37437	0.44161	0.258122	0.983656	-0.401302	0.964474	0.992386	0.99901
414	17344	AA142756	Msx-interacting-zinc finger	Miz1	0.93045	0.956112	1.02601	0.962895	0.948066	1.02442	1.15823	1.11759		0.394046	-0.401302	-1.02632	-0.648737	-0.130884	-1.06205	0.987973	0.897789
415		AA154420			1.0012	0.937079	0.897384	1.03216	1.04779	1.0032	0.922382	0.978875		-1.41736	0.246946	0.892959	-0.818229	-0.314406	-1.41059	0.598542	-1.12964
416	12774	AA144482	chemokine (C-C motif) receptor 5	Ccr5
417	17184	AA138194	matrin 3	Matr3	0.955873	0.952361	0.977349	0.964581	0.90467	0.963325	0.918019	1.06561		-0.976873	-0.91247	-1.29553	-1.12964	0.0802683	-1.10771	-0.186447	-0.634308
418	18854	AI324338	promyelocytic leukemia	Pml	0.951165	1.11062	1.08982	1.18498	0.807237	0.831675	1.0457	1.3151		-1.01414	-0.0898594	-0.401302	0.691124	0.900132	0.477764	-1.08517	0.984102
419	67345	AA146534	RIKEN cDNA 1700056O17 gene	1700056O17Rik	0.935244	0.982903	0.955419	1.08149	1.00347	1.04442	1.08439	1.17075		0.459898	-1.18162	-0.186447	0.685121	-1.4085	-0.271368	0.725272	0.998554
420	14268	AA145458	fibronectin 1	Fn1	0.95093	1.03663	0.96242	0.804683	0.845687	0.744807	0.784507	0.886855		-0.488809	-0.88599	-0.831945	0.99901	0.982251	0.999994	0.999799	0.825417
421	21917	AA138415	thymopoietin	Tmpo	0.964884	1.06676	1.06192	1.00336	0.908169	0.858293	0.908104	1.007		-0.634308	0.323037	0.201243	-1.41059	0.843307	0.99602	0.846693	-1.3831
422	13000	AA155019	casein kinase II, alpha 2, polypeptide	Csnk2a2	0.951901	1.04383	1.00943	1.02156	1.03066	1.0343	1.11447	1.11843		-0.285677	-0.503411	-1.36471	-1.15093	-0.91247	-0.804437	0.868695	0.89047
423	12517	AA163997	CD72 antigen	Cd72	1.06053	1.01064	0.861998	0.864917	0.762072	0.816859	0.776955	0.922497		-0.430433	-1.37885	0.900132	0.885342	0.999793	0.991205	0.999388	0.092779
424	22041	AA172830	transferrin	Trf	0.999942	0.999912	0.999431	1.00004	1.00059	0.999207	0.998749	0.999235		-1.41847	-1.41847	-1.41798	-1.41847	-1.41798	-1.41736	-1.41539	-1.41736
425	22222	AA154379	ubiquitin protein ligase E3 component n-recognin 1	Ubr1	0.907998	0.985439	0.923507	0.985577	0.756218	0.831006	0.880836	0.925212		0.583764	-1.31702	0.280171	-1.39089	0.999985	0.9832	0.877262	0.23567
426	269523	AA168189	valosin containing protein	Vcp	1.01595	1.1089	1.15489	1.11209	1.00079	1.07837	1.16025	1.05477		-1.34265	0.384217	0.821641	0.432308	-1.41835	-0.158549	0.846693	-0.663132
427	19118	AI322783	protamine 1	Prm1	1.08116	1.03301	0.964476	1.05842	0.944032	0.756035	0.971204	0.974312		-0.372239	-1.12964	-1.11876	-0.734469	-1.30291	0.495211	-1.21075	-1.32375
428	21954	AI324533	troponin I, cardiac	Tnni3	1.06022	1.03606	0.960469	1.01021	0.939061	0.952003	1.12823	1.1371		0.30181	-0.518008	-0.328821	-1.33027	0.422901	0.00340585	0.981758	0.990138
429		AA178349			1.0072	1.21187	1.00774	0.930254	0.967491	0.999793	1.08508	1.12998		-1.39772	0.992162	-1.39442	0.0164236	-1.00184	-1.41847	0.224293	0.79752
430		AA178369			1.00033	1.19408	1.1006	1.07205	1.13354	1.13438	1.25852	1.27863		-1.41835	0.999624	0.865727	0.495211	0.979097	0.980202	0.999996	0.999999
431		AA174585			0.987687	1.11918	0.925622	0.890659	0.999917	1.08177	1.00578	1.09085		-1.3485	0.770759	0.224293	0.70286	-1.4165	-0.200478	-1.4036	0.422901
432	11819	AA170421	nuclear receptor subfamily 2, group F, member 2	Nr2f2	0.986405	1.0068	1.07361	1.28158	1.09139	1.1776	1.21532	1.12249		-1.27217	-1.3831	0.537005	0.999999	0.793248	0.998945	0.999927	0.96161
433	14489	AA175524	myotrophin	Mtpn	1.04285	0.988954	0.93136	0.947621	0.898699	0.83921	0.916269	1.00833		-0.445017	-1.33027	0.44161	-0.036119	0.900132	0.999041	0.730658	-1.36965
434	53334	AA178009	golgi SNAP receptor complex member 1	Gosr1	1.0093	1.10646	1.05783	1.08276	1.05138	1.05872	1.35813	1.62244		-3.4985	0.573644	-1.14685	-0.025318	-1.5226	-1.0948	1	1
435	18127	AA177240	nitric oxide synthase 3, endothelial cell	Nos3	1.01379	0.916373	0.94394	0.965844	0.959761	0.958555	0.97101	0.90153		-3.3434	0.446802	-0.793996	-2.23877	-1.82632	-1.74319	-2.58032	0.756259
436	20511	AA177545	solute carrier family 1, member 2	Slc1a2	1.01271	1.02885	0.99242	1.10262	1.00873	1.12277	1.20322	1.17932		-3.32862	-2.39918	-3.48911	0.839128	-3.45834	0.953361	0.999857	0.999132
437	54138	AA186130	spinocerebellar ataxia 10 homolog (human)	Sca10	0.949398	0.904214	0.854258	0.831594	0.87355	0.962637	0.915754	0.981989		-0.538501	0.906005	0.999186	0.999939	0.994064	-1.5226	0.777323	-3.00124
438	68028	AA174807	RIKEN cDNA 3110001N18 gene	3110001N18Rik	1.0118	1.00468	0.990616	1.2541	1.21769	1.322	1.36489	1.30948		-3.45834	-3.56782	-3.50745	0.99955	0.99679	0.999989	0.999999	0.999979
439	14102	AA178126	tumor necrosis factor receptor superfamily, member 6	Tnfrsf6	0.89148	0.868827	0.995137	0.947428	0.893911	1.00796	0.881731	1.08504		-0.916776	-0.265278	-3.57225	-2.91455	-0.992245	-3.58907	-0.966945	-2.21168
440	16452	AA178495	Janus kinase 2	Jak2	1.06509	0.989439	0.865918	1.0387	1.00308	0.936196	0.987618	1.09224		-1.5226	-3.51596	0.77221	-2.68011	-3.58532	-1.38645	-3.47929	-0.429581
441	231329	AA178762	polymerase (RNA) II (DNA directed) polypeptide B	Polr2b	0.9699	1.10059	1.06673	0.884215	0.967258	0.76338	0.978538	0.899558		-3.32862	-1.5775	-2.52935	-0.793996	-3.28197	0.934286	-3.45834	-1.27896
442	22411	AA183414	wingless-related MMTV integration site 11	Wnt11	0.941645	0.782433	0.973352	1.01974	1.27562	1.02867	1.3324	0.870602		-2.55492	0.708965	-3.42373	-3.42373	-0.34587	-3.4985	0.846597	-2.50361
443	16177	AA177717	interleukin 1 receptor, type I	Il1r1	0.873813	1.01057	1.11558	1.19315	1.02061	1.0688	1.01485	1.0646		-0.150329	-3.55178	-0.842641	0.546708	-3.44723	-2.26578	-3.51596	-2.39918
444	12540	AA177796	cell division cycle 42 homolog (S. cerevisiae)	Cdc42	1.05401	1.00312	1.03448	0.980029	0.925826	0.875289	1.04162	1.1723		-2.18451	-3.58532	-2.95845	-3.3434	-1.22579	0.402241	-2.68011	0.518403
445	14069	AA184901	coagulation factor VIII	F8	0.92945	0.994663	1.00178	0.878082	0.82381	0.831654	0.937054	1.07275		-0.472585	-3.56293	-3.58743	0.853758	0.996252	0.993096	-0.8672	-0.606074
446	13163	AA184772	Fas death domain-associated protein	Daxx	0.988266	1.03087	1.01475	1.08493	1.04531	1.17067	1.24621	1.19699		-3.3434	-2.15725	-3.21457	0.654108	-1.0948	0.999103	0.999998	0.999891
447	67185	AA186138	RIKEN cDNA 2700059D21 gene	2700059D21Rik	1.01789	1.06463	1.04623	1.12115	1.01564	0.989032	1.01542	1.0108		-2.91455	0.342639	-0.65202	0.988212	-3.06323	-3.31345	-3.06323	-3.32862
448	20022	AA182240	polymerase (RNA) II (DNA directed) polypeptide J	Polr2j	0.988662	1.04808	1.08089	1.08764	0.985473	1.01047	1.03091	1.01873		-3.28197	-0.408364	0.801426	0.876547	-3.08328	-3.32862	-1.77089	-2.80025
449	12343	AA185066	capping protein (actin filament) muscle Z-line, alpha 2	Capza2	0.985858	0.974133	0.957749	0.999083	0.962515	0.964681	1.02426	1.05896		-3.41136	-3.00124	-2.18451	-3.59024	-2.45168	-2.55492	-3.10303	-1.41354
450	12331	AA189995	CAP, adenylate cyclase-associated protein 1 (yeast)	Cap1	0.928063	0.920408	0.888258	0.934113	0.892597	0.888109	0.973932	1.06655		-0.0082595	0.27855	0.882449	-0.285131	0.842902	0.882449	-2.77667	-0.472585
451	110074	AA204226	deoxyuridine triphosphatase	Dutp	0.965607	1.02078	0.968159	1.02238	0.988491	1.1073	1.11065	0.998171		-2.55492	-3.19683	-2.68011	-3.14155	-3.45834	0.435917	0.508657	-3.58743
452	12530	AA204385	cell division cycle 25 homolog A (S. cerevisiae)	Cdc25a	1.00685	0.976275	1.11883	1.07333	1.18313	1.08611	1.15226	1.20429		-3.56293	-3.26566	0.00859951	-1.46794	0.835276	-0.966945	0.590863	0.91717
453	68275	AA200638	replication protein A1	Rpa1	0.99717	0.971047	1.13992	1.11546	0.995752	0.99665	0.932282	1.15023		-3.58275	-2.86958	0.805965	0.518403	-3.57621	-3.57972	-0.769915	0.873498
454	12366	AA200808	caspase 2	Casp2	1.07106	1.11876	1.04672	0.980558	0.936379	0.978456	1.09864	1.0205		0.390672	0.971445	-0.842641	-2.86958	0.291734	-2.72882	0.885305	-2.8236
455	21390	AA198565	thromboxane A2 receptor	Tbxa2r	0.982584	0.926622	0.93625	0.895716	0.85854	1.08292	0.958431	1.03737		-3.47929	-1.90945	-2.26578	-0.793996	0.223948	-2.04757	-3.12245	-3.23196
456	14678	AA197631	guanine nucleotide binding protein, alpha inhibiting 2	Gnai2	1.04724	1.01494	0.979007	1.05686	0.899311	0.969873	1.08992	1.27853		-0.842641	-3.17874	-2.77667	-0.245622	0.948117	-2.07508	0.777323	1
457	66832	AA197708	RIKEN cDNA 4930524H12 gene	4930524H12Rik	0.967073	0.887557	0.931871	0.903032	0.843037	0.874748	0.945421	0.96861		-1.41354	0.996477	0.702538	0.98018	0.99999	0.999262	0.223948	-1.55003
458	15369	AA204279	heme oxygenase (decycling) 2	Hmox2	0.983063	1.03399	1.15252	1.13491	0.867601	0.953579	1.2274	1.05083		-3.5388	-3.39858	-1.14685	-1.49524	-1.14685	-3.21457	0.0417203	-3.17874
459	12336	AA221288	calpain, small subunit 1	Capns1	0.983676	0.939861	0.994948	0.951274	0.876104	0.904598	0.976365	1.00467		-3.16031	-0.150329	-3.54552	-0.8672	0.985121	0.853758	-2.72882	-3.55178
460	13018	AA185183	CCCTC-binding factor	Ctcf	0.923708	1.03414	0.954185	0.898036	0.851734	0.942401	0.947343	1.01771		-1.27896	-3.04286	-2.58032	-0.285131	0.708965	-2.10253	-2.29268	-3.43569
461	55989	AA186002	nucleolar protein 5	Nol5	0.905517	1.058	1.07316	0.883311	0.937607	0.849482	0.962379	0.993543		0.367009	-1.38645	-0.65202	0.777323	-0.966945	0.969819	-2.37274	-3.55178
462	20687	AA204627	trans-acting transcription factor 3	Sp3	0.974041	0.957685	0.969288	0.928273	0.829332	0.946321	0.899278	1.04597		-3.3434	-2.95845	-3.249	-1.99243	0.661406	-2.63059	-0.916776	-2.91455
463		AA265430	RIKEN cDNA 4921520N01 gene	4921520N01Rik	1.06766	0.991196	0.900553	0.953576	0.881742	0.837417	0.981456	1.04308		-0.818239	-3.51596	0.537427	-1.7986	0.823226	0.989825	-3.249	-2.10253
464	97076	AA212292			1.0363	1.16437	1.32481	1.41029	1.40857	1.25223	1.23327	1.14208		-2.70457	0.876547	0.999898	0.999998	0.999998	0.996985	0.993096	0.721465
465	15216	AA217236	hemochromatosis	Hfe	0.816958	0.97868	1.23261	1.32503	1.17153	1.09461	1.15277	0.998674		0.991735	-3.23196	0.994414	0.999932	0.921289	-0.13187	0.835276	-3.59024
466	57808	AA221110	ribosomal protein L35a	Rpl35a	1.03479	1.00164	1.0372	1.13183	1.15073	1.14847	1.27258	1.14992		-2.26578	-3.58743	-2.12993	0.925222	0.973732	0.970642	0.999989	0.972989
467	12843	AA222683	procollagen, type I, alpha 2	Col1a2	0.973421	0.966592	1.1172	1.19993	1.0768	1.1335	1.21798	1.18067		-2.55492	-2.07508	0.912856	0.999678	0.27855	0.968107	0.999917	0.998719
468	20588	AA221079	SWI/SNF related, matrix associated, actin dependent regulator of chromatin, subfamily c, member 1	Smarcc1	0.999556	1.11194	0.998617	0.987886	0.990082	0.780415	1.05066	1.11369		-3.59094	0.564815	-3.58907	-3.44723	-3.48911	0.999908	-1.7155	0.590863
469	17069	AA221666	lymphocyte antigen 6 complex, locus E	Ly6e	0.942077	0.984113	0.966734	0.981398	0.775844	0.764415	0.850203	1.16911		-2.84672	-3.53164	-3.3434	-3.51596	0.77221	0.835276	-0.285131	-0.408364
470	12824	AA221672	procollagen, type II, alpha 1	Col2a1	0.969575	0.967989	1.02093	1.03609	0.846826	0.906077	0.975453	1.08559		-2.15725	-2.02002	-2.86958	-1.7986	0.999519	0.876547	-2.60555	0.646678
471	17938	AA230684	nascent polypeptide-associated complex alpha polypeptide	Naca	1.41945	1.12057	1.15276	1.00445	1.03766	1.0015	1.05737	1.0346		0.993096	-1.12076	-0.387339	-3.58532	-3.23196	-3.59024	-2.80025	-3.28197
472	12870	AA230354	ceruloplasmin	Cp	0.999942	0.963507	0.908117	0.989957	0.879265	0.968428	1.08033	1.07431		-3.59117	-2.63059	0.0252593	-3.50745	0.695991	-2.84672	-0.675257	-0.916776
473	23897	AA253722	HS1 binding protein	Hs1bp1	0.968777	0.9711	1.0985	1.1546	1.14948	1.19126	1.26823	1.11337		-2.50361	-2.63059	0.537427	0.971445	0.96138	0.996584	0.999972	0.76168
474	21371	AA222795	tubulin cofactor a	Tbca	1.05881	1.18454	1.25791	1.37063	1.31811	1.39301	1.44978	1.41154		-0.698667	0.997797	0.999985	1	1	1	1	1
475	14872	AA230348	glutathione S-transferase, theta 2	Gstt2	1.0255	1.18377	0.870958	1.09619	1.17051	1.40255	1.40922	1.35084		-3.3434	0.599256	0.136338	-1.17305	0.457521	0.999186	0.999353	0.996012
476		AA222128			0.956958	1.03066	0.949197	0.982061	0.956507	0.933279	1.03521	0.981869		-0.793996	-1.93714	-0.226165	-2.89219	-0.745998	0.527993	-1.55003	-2.89219
477	15077	AA231572	histone 2, H3c1	Hist2h3c1	1.04743	1.01178	1.08703	1.12358	1.00545	1.03267	1.03977	1.10858		-1.14685	-3.37179	0.573644	0.945297	-3.54552	-2.18451	-1.68784	0.867198
478	20181	AA209592	retinoid X receptor alpha	Rxra	0.866541	1.32354	1.16184	1.14428	0.760396	0.804882	1.08064	1.08497		-1.41354	0.573644	-1.27896	-1.60503	0.527993	-0.0776931	-2.80025	-2.72882
479	67160	AA240994	RIKEN cDNA 2610301D06 gene	2610301D06Rik	0.99656	1.08185	1.22091	1.23287	1.15744	1.11423	1.18573	1.12211		-3.57225	0.291734	0.999824	0.999925	0.988212	0.850215	0.99812	0.903616
480	66046	AA222463	NADH dehydrogenase (ubiquinone) 1 beta subcomplex, 5	Ndufb5	1.04454	1.07031	0.971862	1.03598	1.04005	1.0658	1.12516	1.04707		-0.583368	0.623586	-1.90945	-1.27896	-0.941788	0.498752	0.995349	-0.408364
481	50912	AA231279	polymyositis/scleroderma autoantigen 2	Pmscl2	0.94736	1.02294	1.051	1.14787	1.04716	0.945878	0.920286	1.00584		0.0252593	-2.47772	-0.675257	0.999213	-0.472585	0.105585	0.860621	-3.50745
482	19186	AA239485	proteasome (prosome, macropain) 28 subunit, alpha	Psme1	0.950128	0.997866	0.932686	1.07093	0.898445	0.846497	0.950625	1.12511		-0.698667	-3.58275	0.251624	0.209826	0.923279	0.999433	-0.722248	0.965369
483	30939	AA250500	pituitary tumor-transforming 1	Pttg1	0.916769	0.867547	0.866329	0.933265	0.975287	0.875017	0.9266	1.10459		0.857226	0.998945	0.999073	0.508657	-2.37274	0.997501	0.695991	0.946725
484	19177	AA212838	proteasome (prosome, macropain) subunit, beta type 7	Psmb7	1.019	1.04299	0.987176	1.01186	1.03093	1.00934	1.07172	1.15641		-3.08328	-1.55003	-3.3434	-3.38538	-2.37274	-3.45834	0.0417203	0.991227
485	12175	AA212780	BCL2/adenovirus E1B 19kDa-interacting protein 1, NIP2	Bnip2	1.00293	0.957775	0.928371	0.891453	0.882105	0.964702	0.891699	1.08182		-3.58532	-2.60555	-1.22579	0.151422	0.378929	-2.86958	0.136338	-1.06896
486	15368	AA213167	heme oxygenase (decycling) 1	Hmox1	0.931781	1.8423	0.881065	1.133	1.20858	0.8819	1.01533	1.55742		-2.31948	1	-0.628958	-0.675257	0.518403	-0.65202	-3.52402	0.99987
487	12007	AA213011	alpha-2-glycoprotein 1, zinc	Azgp1	1.00009	1.00083	1.00167	1.00084	0.995221	0.999825	0.971958	0.996053		-3.59117	-3.59024	-3.58743	-3.59024	-3.56293	-3.59117	-2.65545	-3.57225
488	15439	AA237115	haptoglobin	Hp	0.999673	1.00048	0.950358	1.00167	0.947701	0.958332	0.818311	0.913879		-3.59094	-3.59094	-1.38645	-3.58743	-1.22579	-1.90945	0.997579	0.251624
489	11651	AA237366	thymoma viral proto-oncogene 1	Akt1	1.06839	1.00055	1.02532	1.14257	1.05848	0.959719	0.938823	0.93801		-1.12076	-3.59094	-3.10303	0.766996	-1.60503	-2.39918	-1.27896	-1.22579
490		AA244638			0.912325	1.08432	1.30435	0.946078	1.1394	0.743833	0.820725	1.08523		-1.5775	-1.90945	0.949477	-2.70457	-0.429581	0.980736	0.654108	-1.88175
491	68117	AA250107	RIKEN cDNA 9430083G14 gene	9430083G14Rik	1.01492	1.09202	0.968825	0.984043	1.13653	1.0861	0.955501	1.21074		-3.17874	0.796795	-1.99243	-3.10303	0.990409	0.708965	-0.793996	0.999976
492	16325	AA242421	inhibin beta-C	Inhbc	1.16469	1.15273	1.22708	0.84885	0.839624	0.708615	0.772439	0.659698		-0.265278	-0.494371	0.527993	-0.0425763	0.136338	0.988212	0.863945	0.998874
493	229905	AA245984	cDNA sequence BC037135	BC037135	1.11212	1.44721	1.17205	1.1593	1.22039	1.10293	1.36542	0.99821		-0.150329	0.999991	0.766996	0.661406	0.952098	-0.408364	0.999785	-3.58907
494	73078	AA244687	RIKEN cDNA 3110004O18 gene	3110004O18Rik	0.994036	1.0077	0.936965	0.928119	0.955903	0.962744	0.957953	1.09731		-3.51596	-3.46903	0.317551	0.607506	-0.818239	-1.35945	-0.966945	0.888098
495	234664	AA250151	amyloid beta precursor protein binding protein 1	Appbp1	0.979607	0.893626	0.959698	0.912782	1.0184	0.86838	0.964594	1.01378		-3.06323	0.846597	-1.82632	0.537427	-3.17874	0.973732	-2.15725	-3.3434
496	218451	AA241859			1.02748	0.820732	0.833933	0.899573	0.824016	1.02539	0.902244	0.740174		-3.38538	0.537427	0.354913	-1.33253	0.498752	-3.41136	-1.41354	0.970642
497	11632	AA245324	aryl-hydrocarbon receptor-interacting protein	Aip	0.980998	0.980094	0.929357	0.905683	0.933701	0.912514	0.948243	1.07766		-2.8236	-2.75285	0.654108	0.950804	0.527993	0.908341	-0.150329	0.689323
498	11972	AA239242	ATPase, H+ transporting, V0 subunit D isoform 1	Atp6v0d1	1.04483	1.11658	1.13172	1.09082	1.1154	1.17693	1.26366	1.25504		-1.6602	0.827326	0.921289	0.435917	0.814771	0.994242	0.999979	0.999963
499	19364	AA237779	RAD51-like 3 (S. cerevisiae)	Rad51l3	0.948622	0.943026	0.925923	0.979007	0.938923	0.957715	0.944319	1.04764		0.12106	0.390672	0.846597	-2.47772	0.555837	-0.494371	0.342639	-0.265278
500	20656	AA237953	superoxide dismutase 2, mitochondrial	Sod2	1.038	1.20685	1.04991	1.0419	1.07053	1.11648	1.22125	1.24816		-1.5775	0.999964	-0.722248	-1.27896	0.304734	0.956969	0.999989	0.999999
501	22627	AA250612	tyrosine 3-monooxygenase/tryptophan 5-monooxygenase activation protein, epsilon polypeptide	Ywhae	1.03792	1.05351	1.04477	1.0759	1.11638	0.980865	0.90677	0.989041		-2.12993	-1.17305	-1.68784	-0.0600346	0.810412	-3.14155	0.639115	-3.43569
502	18669	AA239727	ATP-binding cassette, sub-family B (MDR/TAP), member 1B	Abcb1b	1.03528	1.13793	1.0134	0.977529	0.926834	1.06321	0.991883	1.02557		-2.45168	0.89083	-3.39858	-3.06323	-0.187848	-0.891912	-3.51596	-2.93663
503	109900	AA239933	argininosuccinate lyase	Asl	1.01217	1.00239	1.03714	0.875437	0.913259	0.876226	0.844935	0.826133		-3.48911	-3.58743	-2.75285	0.661406	-0.325428	0.646678	0.919254	0.972227
504	218490	AA238461	basic transcription factor 3	Btf3	1.05358	1.05485	1.18927	1.0428	1.27802	1.10387	1.08185	1.14448		-1.46794	-1.41354	0.989825	-2.07508	0.999925	0.468074	-0.150329	0.903616
505	16418	AA253664	integrin beta 4 binding protein	Itgb4bp	1.08921	1.30634	1.54249	1.64677	1.72901	1.39072	1.3389	1.26229		0.181009	0.999992	1	1	1	1	0.999999	0.999891
506	11468	AA220739	actin, gamma 2, smooth muscle, enteric	Actg2	0.8445	0.90804	1.10922	1.03219	0.997503	1.03003	0.934942	1.02815		0.882449	-0.450988	-0.0776931	-3.00124	-3.58743	-3.19683	-1.46794	-3.12245
507	16976	AA253890	low density lipoprotein receptor-related protein associated protein 1	Lrpap1	0.951192	0.987337	0.950608	1.07871	0.982916	1.01408	0.989872	0.999166		-0.745998	-3.31345	-0.722248	0.468074	-3.08328	-3.249	-3.41136	-3.59024
508		AA220113			0.990035	1.24016	1.24355	1.3536	1.2251	1.21356	1.20956	1.11518		-3.35779	1	1	1	0.999999	0.999997	0.999996	0.98018
509	11522	AA221141	alcohol dehydrogenase 1 (class I)	Adh1	1.00011	0.998946	1.00318	0.998449	0.999077	0.998067	0.997939	0.998983		-3.59117	-3.59024	-3.57972	-3.58743	-3.59024	-3.58532	-3.58532	-3.59024
510	16404	AA222315	integrin alpha 7	Itga7	0.934834	0.847356	0.835217	0.848416	0.808949	0.9467	0.921735	0.949632		-1.14685	0.937622	0.968974	0.934286	0.994414	-1.77089	-0.516343	-1.90945
511	20103	AA240279	ribosomal protein S5	Rps5	1.19194	0.984196	1.16558	1.21025	1.17533	1.22991	1.20561	1.11881		0.956969	-3.39858	0.876547	0.979609	0.915038	0.991227	0.975161	0.378929
512	12018	AA220617	BCL2-antagonist/killer 1	Bak1	0.840015	1.0705	1.05567	1.00334	0.79964	0.807154	0.967588	1.24195		0.573644	-2.15725	-2.60555	-3.58743	0.896117	0.860621	-3.00124	0.870382
513		AA230924			0.974727	1.01172	1.02395	1.08025	1.15627	1.14931	1.05368	1.2245		-2.68011	-3.38538	-2.80025	0.330185	0.991227	0.986361	-0.8672	0.999925
514	21917	AA266119	thymopoietin	Tmpo	0.96143	1.22225	1.2474	1.08766	1.01033	0.807064	0.930987	1.19256		-2.58032	0.985121	0.994902	-0.516343	-3.51596	0.992668	-1.06896	0.949477
515	74108	AA238652	poly(A)-specific ribonuclease (deadenylation nuclease)	Parn	0.959207	0.994788	0.982128	0.956959	1.04036	1.04004	0.861831	1.13897		-2.8236	-3.57621	-3.43569	-2.75285	-2.89219	-2.91455	0.508657	0.181009
516	67942	AA239148	ATP synthase, H+ transporting, mitochondrial F0 complex, subunit c (subunit 9), isoform 2	Atp5g2	1.00141	1.06543	1.04783	1.06547	1.16701	1.14113	1.05267	1.10905		-3.58743	-0.168989	-1.14685	-0.150329	0.99679	0.981277	-0.842641	0.863945
517	23991	AA245436	calcium and integrin binding 1 (calmyrin)	Cib1	1.04302	1.00298	1.05911	1.04254	0.950539	0.965209	0.967811	1.01488		-1.7155	-3.57972	-0.722248	-1.74319	-1.14685	-2.15725	-2.34616	-3.29789
518	214552	AA245628	hypothetical protein D030051D21	D030051D21	1.08618	1.03891	0.954518	1.03957	1.10311	1.008	1.06202	1.08447		0.27855	-2.04757	-1.5226	-2.02002	0.646678	-3.50745	-0.698667	0.223948
519	16765	AA265396	stathmin 1	Stmn1	0.772055	1.2115	1.219	1.00862	0.756279	0.648015	0.884522	1.69731		0.639115	-0.0955518	-0.0082595	-3.57621	0.756259	0.993693	-1.55003	0.999565
520		AA403437			0.980568	1.05309	1.07344	1.13002	1.03553	1.13661	1.06537	1.04598		-3.08328	-1.04326	-0.025318	0.932558	-2.15725	0.954594	-0.366508	-1.49524
521		AA261528			1.10116	1.1019	1.28927	1.23818	1.22733	1.21064	1.16465	1.12236		0.518403	0.537427	0.999985	0.999678	0.999374	0.998345	0.977168	0.810412
522	21926	AA261175	tumor necrosis factor	Tnf	1.11529	1.05199	0.946566	0.974616	0.927107	0.999873	0.943676	1.12594		-0.8672	-2.77667	-2.63059	-3.35779	-1.9648	-3.59117	-2.55492	-0.583368
523	56692	AA266352	mitogen-activated protein kinase kinase 1 interacting protein 1	Map2k1ip1	0.980987	1.03242	1.04752	0.955312	0.980647	0.945517	0.957374	1.13968		-3.04286	-2.23877	-1.22579	-1.27896	-3.0222	-0.606074	-1.41354	0.976516
524	93765	AA261605	ubiquitin-conjugating enzyme E2N	Ube2n	0.982836	1.08074	1.10584	1.10287	1.11212	1.01423	0.983941	1.04211		-3.32862	-0.408364	0.342639	0.27855	0.468074	-3.41136	-3.35779	-2.26578
525		AA266335		ESTs, Highly sim	1.07523	1.13123	1.00614	0.95933	1.06415	0.862928	0.94824	1.0629		-0.606074	0.750733	-3.55758	-2.23877	-1.12076	0.921289	-1.60503	-1.17305
526	18128	AA265694	Notch gene homolog 1 (Drosophila)	Notch1	1.49736	2.27004	1.78877	1.76661	1.90894	2.42361	2.23983	2.35395		1	1	1	1	1	1	1	1
527	269846	AA265714	T-cell receptor beta, variable 13	Tcrb-V13	1.07429	1.04494	1.066	0.855079	0.967655	1.03567	0.905876	1.17673		-1.35945	-2.58032	-1.7155	0.739358	-2.97998	-2.91455	-0.325428	0.819042
528	18044	AA261057	nuclear transcription factor-Y alpha	Nfya	1.0386	1.01441	1.15198	1.08045	1.15947	1.17816	1.1681	1.13325		-0.698667	-2.97998	0.999941	0.908341	0.999974	0.999997	0.99999	0.999655
529	19158	AA267598	pleckstrin homology, Sec7 and coiled-coil domains 2	Pscd2	0.927656	0.8382	0.906589	0.877653	0.889426	0.981325	0.939181	1.10725		0.136338	0.99859	0.518403	0.95923	0.906005	-3.12245	-0.408364	0.766996
530	18005	AA268349	NIMA (never in mitosis gene a)-related expressed kinase 2	Nek2	0.806717	1.00614	1.15841	1.16946	0.971865	1.09447	1.01018	1.69123		0.413637	-3.58275	-0.698667	-0.494371	-3.42373	-2.15725	-3.56782	0.999861
531	11841	AA266938	ADP-ribosylation factor 2	Arf2	0.958151	0.979945	1.01447	0.943397	0.965665	0.959465	0.948275	1.08898		-1.38645	-2.95845	-3.26566	-0.387339	-1.9648	-1.49524	-0.698667	0.623586
532	12211	AA260747	baculoviral IAP repeat-containing 6	Birc6	0.955829	1.06127	1.08606	1.11594	1.14222	1.13801	1.16227	1.10286		-1.22579	-0.325428	0.555837	0.915038	0.984237	0.979023	0.996012	0.819042
533	14163	AA272942	FYVE, RhoGEF and PH domain containing 1	Fgd1	0.977559	0.956843	0.93398	0.983984	0.945222	0.958509	0.905037	1.05917		-2.34616	-0.429581	0.695991	-2.91455	0.291734	-0.560844	0.980736	0.342639
534	19699	AA268883	reelin	Reln	0.973933	1.01734	1.13745	1.21175	1.15124	1.19238	1.2735	1.34057		-2.70457	-3.17874	0.95923	0.999655	0.982317	0.99876	0.999995	1
535	16403	AA270921	integrin alpha 6	Itga6	0.935274	1.02773	1.02551	1.06412	0.977709	0.930737	0.966636	0.981769		-0.941788	-2.95845	-3.04286	-1.17305	-3.16031	-0.698667	-2.65545	-3.29789
536	59043	AA259925	expressed sequence AA673511	AA673511	0.944695	1.00199	0.986228	0.918652	1.07536	0.954128	1.08254	1.12407		-0.226165	-3.58275	-3.23196	0.733506	0.446802	-0.8672	0.527993	0.972989
537	16324	AA269776	inhibin beta-B	Inhbb	0.896083	0.997447	0.923216	0.935074	0.949823	1.08236	0.821426	1.1918		-1.27896	-3.58907	-2.15725	-2.52935	-2.93663	-2.18451	0.478462	0.195513
538	19766	AA269857	receptor (TNFRSF)-interacting serine-threonine kinase 1	Ripk1	0.966849	1.1051	1.15337	1.41697	1.74846	1.80992	2.74239	4.53268		-2.95845	-0.265278	0.639115	0.999981	1	1	1	1
539	67100	AA270017			1.07484	0.994625	1.06768	0.994608	0.769839	0.966874	0.913095	1.13592		-2.55492	-3.58532	-2.72882	-3.58532	0.810412	-3.3434	-2.04757	-1.0948
540	69742	AA269940	RIKEN cDNA 2410018G23 gene	2410018G23Rik	1.04982	1.10163	1.23228	1.12628	1.14424	1.11176	1.05646	1.17556		-0.698667	0.89083	0.999996	0.98018	0.994902	0.943835	-0.305181	0.999579
541	26417	AA270930	mitogen activated protein kinase 3	Mapk3	0.958004	0.902942	0.798891	0.870418	0.788559	0.931862	0.97558	1.05544		-0.916776	0.954594	1	0.998397	1	0.537427	-2.4255	-0.168989
542	19275	AA260000	protein tyrosine phosphatase, receptor type, N	Ptprn	1.04833	1.07044	1.01971	1.04959	1.03604	1.11413	1.14449	1.21652		-1.5226	-0.34587	-3.14155	-1.46794	-2.29268	0.766996	0.949477	0.999238
543	17762	AA274904	microtubule-associated protein tau	Mapt	0.96008	1.04848	0.987562	1.06385	0.939634	0.977101	1.078	1.15548		-1.14685	-0.675257	-3.26566	0.166312	0.181009	-2.58032	0.615616	0.998719
544	66706	AA274987	RIKEN cDNA 4733401H18 gene	4733401H18Rik	0.998409	0.892524	1.0015	0.951825	1.06554	1.07755	0.914301	0.961255		-3.58907	0.424862	-3.58907	-2.04757	-1.35945	-0.842641	-0.245622	-2.52935
545	14208	AA271895	protein phosphatase 1G (formerly 2C), magnesium-dependent, gamma isoform	Ppm1g	1.0413	1.05036	1.15202	1.01957	0.953893	0.957941	0.952579	1.10747		-2.86958	-1.99243	0.835276	-3.29789	-2.10253	-2.31948	-2.04757	0.223948
546	73274	AA272124	RIKEN cDNA 1700034P14 gene	1700034P14Rik	0.967197	0.963802	0.899647	0.805322	0.856905	0.857481	0.863812	1.06876		-2.60555	-2.39918	0.564815	0.999238	0.96138	0.960318	0.940803	-0.769915
547	68292	AA277846	RIKEN cDNA 1300006C19 gene	1300006C19Rik	1.06398	0.965034	1.04725	0.955674	0.973596	0.936356	0.942234	0.799431		-1.17305	-2.58032	-2.02002	-2.07508	-2.97998	-0.992245	-1.3057	0.998945
548	17995	AA277555	NADH dehydrogenase (ubiquinone) flavoprotein 1	Ndufv1	1.12193	1.05785	1.04697	1.07575	1.09385	1.10412	1.0979	1.14546		0.646678	-1.41354	-1.99243	-0.583368	0.0740476	0.330185	0.181009	0.863945
549	192159	AA277696	pre-mRNA processing factor 8	Prpf8	1.01225	1.07533	1.06827	0.992393	0.989354	0.973257	0.948718	0.99917		-3.31345	0.457521	0.223948	-3.45834	-3.37179	-2.37274	-0.472585	-3.59024
550	12894	AA277495	carnitine palmitoyltransferase 1a, liver	Cpt1a	1.0941	1.37519	1.14303	0.781607	0.73333	0.97518	0.884393	1.26828		-2.21168	0.925222	-1.12076	0.639115	0.908341	-3.46903	-1.38645	0.573644
551	26443	AA271066	proteasome (prosome, macropain) subunit, alpha type 6	Psma6	1.00807	1.09128	1.05647	0.935159	1.03659	0.974727	0.975181	1.05848		-3.44723	0.863945	-0.0776931	0.457521	-1.4407	-2.31948	-2.37274	0.0252593
552	97165	AA275111	high mobility group box 2	Hmgb2	1.31694	1.74679	1.37562	1.35175	1.15602	1.10013	1.04693	1.38542		0.925222	0.999995	0.979023	0.964409	-0.366508	-1.68784	-3.06323	0.983303
553	12772	AA289476	chemokine (C-C) receptor 2	Ccr2	0.965666	0.967877	0.932797	0.945676	0.926568	0.891768	1.04953	1.22145		-2.77667	-2.86958	-1.12076	-1.77089	-0.818239	0.402241	-2.15725	0.985959
554	16792	AA288513	lysosomal-associated protein transmembrane 5	Laptm5	0.930485	0.974696	1.0031	1.08193	0.785073	0.836076	1.09775	1.71264		-1.74319	-3.29789	-3.58743	-1.49524	0.975847	0.77221	-0.966945	1
555	18082	AA261261	4-nitrophenylphosphatase domain and non-neuronal SNAP25-like protein homolog 1 (C. elegans)	Nipsnap1	0.972132	0.86842	0.822457	0.916038	1.03765	1.06611	0.976394	1.02534		-2.37274	0.994414	0.99996	0.721465	-1.7155	0.00859951	-2.68011	-2.60555
556	11430	AA261287	acyl-Coenzyme A oxidase 1, palmitoyl	Acox1	0.969071	1.14453	0.933989	0.790019	0.775977	0.80495	0.946426	0.907935		-3.12245	0.342639	-1.74319	0.981804	0.991484	0.960318	-2.29268	-0.65202
557	15369	AA274811	heme oxygenase (decycling) 2	Hmox2	0.848653	1.07433	1.12505	0.994768	0.995689	1.0409	1.10535	1.17357		0.984237	-0.408364	0.787252	-3.56293	-3.57225	-2.15725	0.518403	0.979609
558	17966	AA270187	neighbor of Brca1 gene 1	Nbr1	0.955756	1.0202	0.91644	0.957795	0.874861	0.955128	0.839733	1.04815		-1.14685	-2.95845	0.695991	-1.3057	0.988212	-1.0948	0.999644	-1.01768
559	53328	AA288129	progesterone receptor membrane component 1	Pgrmc1	0.901063	0.97183	1.17171	0.979328	0.987363	0.969149	1.03791	1.19738		-0.941788	-3.29789	0.342639	-3.43569	-3.53164	-3.249	-3.10303	0.615616
560	27632	AA290538	RD RNA-binding protein	Rdbp	0.991124	0.896923	0.941365	0.926096	0.966818	0.880288	0.885236	0.967162		-3.42373	0.972227	0.151422	0.682533	-1.68784	0.994744	0.991227	-1.7155
561	14663	AA288467	glycosylation dependent cell adhesion molecule 1	Glycam1	0.897384	1.01129	1.01144	1.01689	1.08836	1.13597	0.80875	1.0056		-0.13187	-3.52402	-3.51596	-3.43569	-0.916776	0.330185	0.969819	-3.57225
562	19216	AA396341	prostaglandin E receptor 1 (subtype EP1)	Ptger1	0.986603	1.04563	1.05722	1.01845	1.07732	0.981387	1.07834	1.14651		-3.23196	-0.891912	-0.168989	-2.63059	0.582327	-2.91455	0.607506	0.996985
563	11566	AA388461	adenylosuccinate synthetase 2, non muscle	Adss2	1.01207	1.08411	1.07885	0.890839	0.961737	0.996422	0.832801	1.13328		-3.54552	-1.85404	-2.02002	-0.745998	-3.10303	-3.58743	0.564815	-0.494371
564	14210	AA388985	fibroblast growth factor inducible 15	Fin15	1.04364	1.05015	1.12939	0.941811	1.04023	0.883035	0.975073	0.962659		-2.39918	-2.10253	0.546708	-1.88175	-2.55492	0.590863	-3.14155	-2.63059
565	12494	AA472876	CD38 antigen	Cd38	0.923226	0.925235	1.07786	1.08278	0.935315	1.00824	1.07756	1.19852		0.518403	0.457521	0.378929	0.508657	0.0740476	-3.47929	0.367009	0.999777
566	20182	AA289135	retinoid X receptor beta	Rxrb	1.00748	1.05997	1.00682	0.87679	0.945114	0.922486	0.964712	1.02941		-3.50745	-0.494371	-3.52402	0.975847	-0.606074	0.435917	-1.99243	-2.47772
567	26411	AA288220	mitogen activated protein kinase kinase kinase kinase 1	Map4k1	1.04535	1.02758	1.001	1.04262	1.08519	1.03246	1.04663	1.06015		-0.675257	-2.12993	-3.58907	-0.891912	0.823226	-1.7155	-0.583368	0.181009
568	15247	AA389935	hippocampus abundant gene transcript 1	Hiat1	1.04746	0.979081	0.891444	0.846171	0.90147	0.85813	0.928781	1.11973		-1.14685	-2.91455	0.940803	0.999011	0.873498	0.99679	0.304734	0.932558
569	19362	AA386769	RAD51 associated protein 1	Rad51ap1	0.901627	1.02809	1.02071	0.965531	0.969819	1.02235	0.990616	1.15598		0.695991	-2.75285	-3.10303	-2.31948	-2.58032	-3.0222	-3.47929	0.971445
570	57294	AA274176	ribosomal protein S27	Rps27	1.08871	0.997783	1.13566	1.03599	1.13434	1.1031	1.23725	1.15523		-1.22579	-3.58907	0.0579829	-3.04286	0.0417203	-0.769915	0.932558	0.402241
571	19384	AA271948	RAN, member RAS oncogene family	Ran	1.0038	1.05485	1.34151	1.31676	1.30416	1.21683	1.22572	1.30499		-3.58532	-2.52935	0.995349	0.990121	0.985546	0.831342	0.867198	0.985959
572	13688	AA272186	eukaryotic translation initiation factor 4E binding protein 2	Eif4ebp2	0.946898	1.14192	1.07052	1.0667	1.01482	1.02239	1.03782	1.0865		-1.12076	0.934286	-0.408364	-0.583368	-3.3434	-3.04286	-2.21168	0.195513
573	268656	AA386799	serine palmitoyltransferase, long chain base subunit 1	Sptlc1	1.04179	1.0054	1.09097	0.976148	1.01714	1.0106	1.01606	1.20529		-6.96366	-8.16368	-3.77511	-7.71962	-7.96273	-8.09525	-7.98239	0.478475
574		AA386718			0.938429	1.08945	1.15865	1.0091	1.02814	0.983499	1.01278	1.11487		0.164266	0.865053	0.999822	-7.71962	-4.71073	-6.74275	-7.32449	0.986185
575	14177	AA387563	fibroblast growth factor 6	Fgf6	1.02805	1.01365	1.13377	0.993694	0.979449	1.02601	0.854848	1.10398		-7.77483	-8.08182	-2.63816	-8.16368	-7.96273	-7.82681	-1.19212	-4.1574
576		AA387675			1.08359	1.06123	1.03662	0.976063	1.03096	0.983873	0.9746	1.029		0.322499	-1.12105	-4.32287	-6.16396	-5.20794	-7.20986	-5.95867	-5.48055
577	18764	AA275686	polycystic kidney disease 2	Pkd2	0.95751	0.934622	0.921499	0.906585	0.918618	1.01717	1.0873	1.05673		-4.10242	-1.22825	-0.196072	0.489964	-0.0230983	-7.39756	-0.085461	-2.54147
578	56550	AA276008	ubiquitin-conjugating enzyme E2D 2	Ube2d2	0.977156	1.06705	1.05046	1.03445	1.02259	0.880684	0.962456	0.965014		-6.50918	-0.98372	-2.78558	-4.98763	-6.65076	0.9592	-4.32287	-4.76618
579	16186	AA274104	interleukin 2 receptor, gamma chain	Il2rg	0.881732	0.900851	1.01342	1.17695	0.865214	0.852516	1.08523	1.52807		-0.917448	-2.12314	-8.01908	0.293028	-0.196072	0.214648	-3.72108	0.99999
580	12505	AA273296	CD44 antigen	Cd44	0.740439	0.838838	1.04291	0.946902	0.746823	0.801442	1.16002	2.02704		0.764789	-1.45347	-7.50193	-7.04813	0.71432	-0.173269	-2.58966	0.999999
581	14933	AA275564	glycerol kinase	Gyk	0.967507	0.919009	0.800344	0.655415	0.725727	0.808299	0.865043	0.754413		-6.50918	-1.53173	0.996238	1	0.999993	0.993166	0.752979	0.999914
582	20657	AA276287	superoxide dismutase 3, extracellular	Sod3	1.00155	1.05312	0.98504	0.977397	0.95323	0.979361	1.03048	1.10293		-8.18239	-4.76618	-7.82681	-7.36136	-5.15301	-7.24872	-6.83272	-0.789659
583	21802	AA276915	transforming growth factor alpha	Tgfa	1.05097	0.945305	0.879574	1.0988	0.986084	0.985113	1.0259	1.16684		-4.21247	-3.45365	0.746878	-0.242719	-7.77483	-7.71962	-6.87692	0.941258
584		AA276721			1.04593	0.978147	0.832855	0.803437	0.840487	0.866116	1.03004	0.940304		-7.00618	-7.96273	-0.0643457	0.336844	-1.08612	-1.3768	-7.66125	-6.46109
585	12550	AA276110	cadherin 1	Cdh1	0.919507	0.836838	0.81627	0.951847	0.728887	0.706308	0.734785	0.951689		-3.99279	0.336844	0.685658	-6.41257	0.995	0.998706	0.993166	-6.41257
586	70628	AA276213			0.989173	0.968423	1.05148	1.08544	1.00638	1.01247	1.0518	1.0453		-7.87549	-5.7486	-3.40077	-0.340251	-8.08182	-7.77483	-3.34811	-4.1574
587	19701	AA276457	renin 1 structural	Ren1	0.855261	0.981353	1.00869	0.961544	0.89522	1.07344	0.950702	1.04849		0.378359	-7.82681	-8.10778	-6.697	-1.30173	-4.1574	-5.85418	-6.06197
588	231086	AA286024	hydroxyacyl-Coenzyme A dehydrogenase/3-ketoacyl-Coenzyme A thiolase/enoyl-Coenzyme A hydratase (trifunctional protein), beta subunit	Hadhb	1.02136	1.15752	1.05062	1.00711	0.99614	1.05276	1.06356	1.05849		-7.24872	0.913898	-4.1574	-8.08182	-8.15667	-3.88366	-2.73613	-3.29568
589	15078	AA275906	H3 histone, family 3A	H3f3a	0.975762	0.993882	0.953902	1.00228	0.954626	0.973502	1.02733	1.0638		-6.87692	-8.09525	-4.26763	-8.1749	-4.32287	-6.65076	-6.65076	-2.54147
590		AA419665			0.999652	1.00112	0.999327	0.997054	1.00008	0.999969	0.99818	1.00065		-8.18614	-8.17911	-8.18473	-8.1301	-8.18661	-8.18661	-8.16368	-8.18473
591	20873	AA276998	serine/threonine kinase 18	Stk18	0.977906	1.07164	1.07484	0.876024	0.85805	0.991829	0.985868	1.05473		-7.5679	-3.72108	-3.45365	0.129226	0.593402	-8.09525	-7.92082	-5.15301
592	20768	AA414662	selenophosphate synthetase 2	Sephs2	0.954576	0.945539	0.877973	0.889693	0.575038	0.805549	0.817865	0.71858		-7.13023	-6.697	-2.54147	-3.24349	0.999985	0.262495	-0.0230983	0.964618
593	27058	AA413739	signal recognition particle 9	Srp9	1.05407	0.930168	0.982864	1.03713	0.888637	0.91199	1.0363	0.93915		-5.31743	-3.56004	-7.82681	-6.65076	-0.47032	-1.94654	-6.74275	-4.37817
594	13663	AA413622	etoposide induced 2.4 mRNA	Ei24	0.950691	0.877071	0.969037	0.911459	0.904255	0.900892	1.13597	0.94232		-5.04284	0.364771	-6.83272	-1.33906	-0.821014	-0.638742	0.277896	-4.1574
595	12402	AA414809	Casitas B-lineage lymphoma	Cbl	0.836965	0.999254	1.18799	1.03964	0.6484	0.540846	1.11102	1.09876		-1.26479	-7.50193	-1.45347	-7.00618	0.70738	-0.365532	-3.66721	-5.31743
596	27054	AA290021	SEC23B (S. cerevisiae)	Sec23b	1.01296	0.802858	1.31251	1.2424	1.11255	0.822709	1.06196	0.751667		-8.1194	-0.150809	0.593402	-0.196072	-4.54435	-0.758696	-6.83272	0.700291
597	15404	AA388599	homeo box A7	Hoxa7	0.866119	0.906279	1.05325	0.795475	0.948539	1.18187	0.93749	0.952478		-4.5998	-6.26455	-7.20986	-2.98634	-7.74763	-5.95867	-7.87549	-7.28693
598	68145	AA473938	RIKEN cDNA 5730466H23 gene	5730466H23Rik	0.929383	0.954579	0.86241	0.913969	0.803898	0.752705	0.819785	1.04294		-4.71073	-7.04813	-1.4924	-5.64203	0.417659	0.941258	0.0929952	-6.65076
599	11927	AA416325	ATX1 (antioxidant protein 1) homolog 1 (yeast)	Atox1	1.03188	0.984263	0.957446	0.962289	0.902222	0.967572	1.12904	1.07774		-5.7486	-7.50193	-4.10242	-4.82161	0.58395	-5.53458	0.865053	-0.697942
600	15194	AA437749	Huntington disease gene homolog	Hdh	0.977237	1.07259	0.963264	0.991272	0.914681	1.06126	1.13817	1.06254		-7.5679	-4.71073	-6.60403	-8.09525	-2.21364	-4.71073	-0.0435591	-4.5998
601	51788	AA466087	H2A histone family, member Z	H2afz	0.918851	0.932376	1.01216	0.887822	0.833449	0.786142	0.874052	1.07139		-1.4924	-2.73613	-7.9422	0.262495	0.964618	0.998902	0.620649	-2.83533
602	66878	AA444950	RIO kinase 3 (yeast)	Riok3	1.01094	1.00897	0.96362	0.888021	0.854222	0.969185	0.94352	1.02254		-7.92082	-8.00117	-5.48055	0.693051	0.969356	-6.16396	-2.88538	-7.08948
603	68024	AA444660	histone 1, H2bc	Hist1h2bc	1.00473	0.992876	1.13182	1.05061	0.976871	0.927623	0.995282	0.987503		-8.15667	-8.10778	0.146893	-5.20794	-7.39756	-2.73613	-8.15667	-7.96273
604	17311	AA403846	kit ligand	Kitl	0.951719	1.06378	0.987289	0.895411	0.904304	1.01453	1.13302	1.09307		-7.17036	-6.60403	-8.10778	-4.21247	-5.26275	-8.1194	-3.34811	-5.90657
605	83397	AA403828	A kinase (PRKA) anchor protein (gravin) 12	Akap12	1.02583	1.01281	0.984432	0.993115	0.877107	0.928268	1.11763	0.948433		-7.04813	-7.89858	-7.74763	-8.09525	0.637916	-2.07843	0.146893	-4.26763
606		AA433053			1.08901	1.03247	0.933332	0.879908	1.00364	0.942191	1.07437	1.02995		-2.25943	-6.92056	-3.66721	0.0555474	-8.16976	-4.54435	-3.40077	-7.08948
607	20449	AA423143	sialyltransferase 8 (alpha-2, 8-sialyltransferase) A	Siat8a	1.03042	1.03361	0.931669	0.842431	1.03785	0.885743	0.935418	0.765009		-7.82681	-7.82681	-6.41257	-1.77597	-7.98239	-4.93234	-7.32449	-0.758696
608	280668	AA647124	a disintegrin and metalloproteinase domain 1a	Adam1a	0.923928	0.976631	1.03726	0.97222	1.06343	1.03054	1.02604	0.970036		-5.80152	-8.0361	-7.5679	-7.96273	-7.39756	-7.69083	-7.85157	-7.92082
609	20224	AA444425	SAR1a gene homolog 1 (S. cerevisiae)	Sara1	0.906038	1.0966	1.09636	1.03792	0.924614	0.813366	0.897403	0.982282		-0.552824	-0.917448	-0.950385	-6.06197	-1.94654	0.992021	-0.085461	-7.66125
610		AA444533			0.986119	1.10735	1.10542	1.14701	1.06486	0.979488	1.04425	1.10871		-7.87549	-0.47032	-0.552824	0.637916	-3.50674	-7.50193	-5.53458	-0.391177
611	71955	AA427055	RIKEN cDNA 2400003C14 gene	2400003C14Rik	0.898686	1.06031	1.00895	1.03029	1.03876	1.03183	0.981577	1.01727		0.564471	-2.54147	-7.98239	-6.11313	-5.09798	-5.95867	-7.32449	-7.46785
612	69077	AA465980	proteasome (prosome, macropain) 26S subunit, non-ATPase, 11	Psmd11	0.939135	0.971178	1.17988	1.07743	1.00092	1.03226	1.19221	1.14833		-4.1574	-7.08948	0.78156	-3.08841	-8.18473	-6.92056	0.861512	0.364771
613		AA465987			1.02928	1.00145	0.97792	0.859833	0.862292	0.869868	1.09577	0.947871		-7.36136	-8.18473	-7.66125	0.246823	0.181347	-0.0643457	-2.54147	-5.58841
614	66218	AA415725	NADH dehydrogenase (ubiquinone) 1 beta subcomplex, 9	Ndufb9	1.08067	0.980768	0.947024	0.985379	1.01703	0.941516	1.0821	0.991231		-4.82161	-7.92082	-6.36363	-8.0361	-7.98239	-5.95867	-4.76618	-8.1301
615	26400	AA451434	mitogen activated protein kinase kinase 7	Map2k7	0.9388	1.06856	1.02221	1.01716	0.850067	0.863767	1.01415	1.00579		-4.26763	-3.99279	-7.59978	-7.82681	0.70738	0.466765	-7.9422	-8.13988
616	56615	AA433516	microsomal glutathione S-transferase 1	Mgst1	1.00742	1.02143	1.01962	1.07799	0.935902	0.99771	0.950944	0.984837		-8.01908	-6.87692	-7.08948	-0.443569	-1.15639	-8.16976	-2.93571	-7.50193
617	68349	AA422241	NADH dehydrogenase (ubiquinone) Fe-S protein 3	Ndufs3	0.916712	1.01585	0.94335	1.009	1.00072	1.07245	1.12906	1.04076		0.875187	-6.87692	-0.219221	-7.74763	-8.18239	0.466765	0.996117	-2.49362
618	16149	AA419750	Ia-associated invariant chain	Ii	0.889832	0.781779	0.967429	1.17907	0.836463	0.690304	1.12767	2.89669		-5.20794	-0.697942	-7.89858	-3.24349	-2.68699	0.770503	-5.09798	1
619	30963	AA419741	protein tyrosine phosphatase-like (proline instead of catalytic arginine), member a	Ptpla	1.0229	1.061	0.933702	0.966059	0.971017	1.03601	1.17139	1.08944		-7.24872	-3.45365	-2.49362	-6.16396	-6.697	-6.06197	0.920599	-1.08612
620	19228	AA575668	parathyroid hormone receptor 1	Pthr1	1.01432	0.767344	0.785369	0.883398	0.746854	0.745227	0.995415	0.956291		-7.98239	0.988123	0.967537	-0.821014	0.996581	0.996893	-8.16368	-6.41257
621	18399	AA575680	solute carrier family 22 (organic anion transporter), member 6	Slc22a6	0.913222	1.0551	0.789771	0.93569	1.13468	1.06802	1.00009	0.933753		-5.42635	-6.60403	-1.08612	-7.17036	-3.08841	-6.06197	-8.10778	-7.08948
622	12450	AA458196	cyclin G1	Ccng1	0.955839	1.04464	1.03679	0.873652	0.838716	0.895169	0.899307	1.19282		-6.788	-6.87692	-7.28693	-1.22825	0.146893	-2.49362	-2.78558	0.146893
623	16923	AA451423	linker of T-cell receptor pathways	Lnk	0.899639	1.00531	0.915171	0.923511	0.924267	0.847539	1.08072	1.23809		-3.13985	-8.1749	-4.26763	-4.877	-4.877	-0.758696	-4.98763	0.58395
624	13645	AI098350	epidermal growth factor	Egf	0.988318	1.04904	0.997051	1.04163	0.954083	1.10111	0.86818	1.0047		-8.08182	-6.50918	-8.00117	-6.92056	-6.55683	-3.08841	-0.668149	-8.16976
625	20686	AA444790	sperm autoantigenic protein 17	Spa17	1.06726	1.35965	1.34702	0.992781	1.2817	0.952467	1.10208	1.00007		-4.98763	0.997178	0.99573	-8.13988	0.964618	-6.21444	-2.58966	-8.18661
626	13723	AA450836	embigin	Emb	0.939035	1.01422	1.05358	0.917661	0.870235	0.973674	0.935698	1.04356		-5.69543	-8.0361	-6.36363	-4.10242	-1.01745	-7.66125	-5.48055	-6.92056
627	67130	AA462323	NADH dehydrogenase (ubiquinone) 1 alpha subcomplex, 6 (B14)	Ndufa6	1.03148	0.936175	0.962918	1.03144	0.953492	1.07901	1.05094	0.974327		-6.21444	-2.12314	-5.42635	-6.21444	-4.21247	-1.22825	-3.99279	-6.74275
628	54381	AA475930	RIKEN cDNA 1190003P12 gene	1190003P12Rik	0.971375	0.997785	0.856391	0.912377	0.810788	0.848155	1.07493	1.04434		-6.697	-8.17911	0.906679	-0.668149	0.99647	0.944429	-2.16821	-5.20794
629	24128	AA475568	5'-3' exoribonuclease 2	Xrn2	0.957938	0.988235	0.922329	1.04721	0.886559	0.885509	1.00739	1.08002		-3.99279	-7.77483	-0.150809	-3.56004	0.887619	0.896187	-8.01908	-0.391177
630	11804	AA475422	amyloid beta (A4) precursor-like protein 2	Aplp2	0.982487	1.08986	0.907019	0.997423	0.835618	0.957424	1.13682	1.04485		-7.50193	-0.497445	0.0929952	-8.16976	0.9925	-4.71073	0.807142	-4.65527
631	69263	AA607457	replication factor C (activator 1) 3	Rfc3	0.920159	0.891635	0.917599	0.878047	0.862157	0.977249	0.96489	0.925426		-2.63816	-0.638742	-2.44609	-0.0230983	0.454832	-7.53528	-6.74275	-3.08841
632	22687	AA051554	zinc finger protein 259	Zfp259	1.0138	1.08006	1.02415	1.23386	1.0477	1.23421	1.30727	1.1733		-7.63089	-0.391177	-6.60403	0.999908	-3.56004	0.999908	0.999999	0.993578
633	11951	AA139793	ATP synthase, H+ transporting, mitochondrial F0 complex, subunit c (subunit 9), isoform 1	Atp5g1	0.972489	0.986813	1.06021	1.01513	0.970386	0.989658	1.13225	0.955369		-7.24872	-7.96273	-4.76618	-7.89858	-7.13023	-8.1301	-0.219221	-5.90657
634		AA271505			1.02572	1.04012	0.90732	0.864701	0.835409	0.90909	1.0591	0.992511		-7.00618	-5.64203	-0.315331	0.854175	0.979031	-0.417188	-3.61353	-8.08182
635	22702	AA607102	zinc finger protein 42	Zfp42	0.977478	1.10167	0.981054				1.07521	1.25437		-8.13988	-7.36136	-8.1749	-7.71962	-5.95867	NA		NA
636	17393	AI316399	matrix metalloproteinase 7	Mmp7	0.930582	1.10166	0.936836	0.915204	0.869495	0.846026	0.983811	1.11278		-5.37197	-3.56004	-5.80152	-4.26763	-0.852764	0.0363594	-8.09525	-2.93571
637	21333	AA982788	tachykinin 1	Tac1	0.895731	1.00373	0.979578	0.846136	0.852589	0.996502	0.926124	1.01681		-3.08841	-8.17911	-7.92082	-0.47032	-0.728124	-8.17911	-5.20794	-8.01908
638	14202	AI173197	four and a half LIM domains 4	Fhl4	0.952689	0.885585	1.05207	0.898405	0.939495	0.95031	0.954016	0.919139		-6.11313	-0.950385	-5.95867	-1.73428	-5.04284	-5.95867	-5.7486	-3.29568
639	69980	AI173214			1.00528	1.01295	1.02434	0.938061	0.830792	0.931255	0.903206	0.932424		-8.1749	-8.1194	-7.9422	-6.65076	-1.01745	-6.31428	-4.76618	-6.36363
640	13430	AI156587	dynamin 2	Dnm2	0.979287	1.02572	0.972612	0.950383	0.849113	0.911103	0.868694	0.967129		-7.9422	-7.82681	-7.77483	-6.87692	-0.917448	-4.43352	-1.86049	-7.59978
641	11723	AI037706	amylase 2, pancreatic	Amy2	1.17635	1.14744	0.901697	0.957868	0.944957	1.42486	1.13324	1.0673		-3.40077	-4.43352	-6.26455	-7.71962	-7.59978	0.662527	-4.93234	-7.13023
642	12585	AI385804	cerebellar degeneration-related 2	Cdr2	0.933426	0.97873	0.935598	1.02703	1.11176	1.1529	0.980594	0.979485		-5.09798	-7.69083	-5.26275	-8.10778	-2.73613	-1.4924	-7.89858	-7.85157
643	16330	AA289577	inositol polyphosphate-5-phosphatase B	Inpp5b	0.977191	0.928285	0.927112	0.829291	0.880947	0.941685	0.888599	0.931278		-7.20986	-1.99013	-1.86049	0.984882	0.602668	-3.40077	0.4048	-2.25943
644		3xSSC			0.91578	0.908309	1.0661	0.958677	0.980711	0.941125	0.957792	0.986451		-6.41257	-6.41257	-7.20986	-7.71962	-8.06748	-7.43306	-8.1301	-8.09525
645		3xSSC			0.952303	1.23333	0.945649	0.907191	1.0399	1.28161	1.15086	1.09078		-7.77483	-0.524946	-7.00618	-3.66721	-8.17911	-2.78558	-2.39891	-4.82161
646		3xSSC			0.967898	1.10477	1.06544	0.914837	1.0486	0.990128	1.11198	1.12608		-7.04813	-1.81803	-4.65527	-2.54147	-6.01048	-7.74763	-1.41493	-0.728124
647	381323	AU050846	similar to 60S ribosomal protein L18a	na	1.03047	1.04812	1.12887	1.27289	1.19799	1.26344	1.38799	1.29104		-6.26455	-4.21247	0.740644	0.999935	0.993966	0.999886	1	0.999979
648	20755	AI596101	small proline-rich protein 2A	Sprr2a	0.968482	1.00124	1.1198	1.08011	0.910565	1.01127	0.906515	0.981888		-6.41257	-8.18239	0.293028	-1.73428	-0.552824	-7.9422	-0.315331	-7.5679
649	15135	AV005302	hemoglobin Y, beta-like embryonic chain	Hbb-y	1.26154	0.830979	1.06612	1.10218	0.985827	1.06523	0.843327	0.637963		0.277896	-0.758696	-6.50918	-4.76618	-8.09525	-6.55683	-1.26479	0.998021
650	17283	AW321532	multiple endocrine neoplasia 1	Men1	0.86221	0.978078	1.01935	0.911914	0.688612	0.698443	0.835087	0.901631		0.164266	-7.69083	-7.80123	-2.54147	0.999961	0.99992	0.71432	-1.77597
651	51798	AA667410	enoyl coenzyme A hydratase 1, peroxisomal	Ech1	0.917083	0.814847	0.91153	1.03348	0.894264	0.928267	1.00599	1.05486		-1.94654	0.971078	-1.53173	-6.788	-1.30173	-2.93571	-8.13988	-4.93234
652	15135	W29631	hemoglobin Y, beta-like embryonic chain	Hbb-y	1.27762	0.772213	1.24794	1.02162	1.13344	1.18574	0.772239	0.684453		-0.315331	-0.0643457	-0.852764	-8.05224	-4.43352	-2.54147	-0.0643457	0.890544
653	28077	AL034823	DNA segment, Chr 13, Wayne State University 50, expressed	D13Wsu50e	0.909293	0.912544	1.00082	1.01653	0.984126	0.954669	0.976541	1.10122		0.230875	0.0929952	-8.18473	-7.50193	-7.53528	-3.99279	-6.83272	0.277896
654	77067	AA143951	RIKEN cDNA 5930434B04 gene	5930434B04Rik	0.962924	0.944421	1.09538	1.19234	1.1003	1.21315	1.32167	1.18598		-5.42635	-3.03724	-0.196072	0.990405	0.0168579	0.997178	0.999996	0.986185
655	66616	AI155753	sorting nexin 9	Snx9	1.05317	1.00991	1.17653	1.00683	1.10091	1.09864	1.29146	1.09859		-5.26275	-8.05224	0.734273	-8.1301	-1.53173	-1.65208	0.996893	-1.65208
656	66616	AI155753	sorting nexin 9	Snx9	0.96193	0.888486	0.896518	1.05004	0.922765	0.97164	0.868845	0.898308		-6.01048	0.164266	-0.173269	-4.98763	-1.94654	-6.92056	0.670398	-0.266568
657	68052	AA051755	ribosomal protein S13	Rps13	0.949886	1.0161	1.11915	1.21316	1.15572	1.26163	1.2962	1.22223		-2.68699	-7.39756	0.850375	0.999781	0.986185	0.999994	1	0.999886
658	12317	W44140	calreticulin	Calr	1.05248	1.09008	1.21486	1.10264	0.802633	0.941647	0.679961	0.77109		-5.7486	-2.88538	0.854175	-2.03409	0.94744	-4.98763	0.999986	0.991249
659	15904	AA008963	inhibitor of DNA binding 4	Idb4	1.00253	1.00109	1.01244	0.981089	0.95443	1.04371	0.874829	0.920007		-8.18239	-8.18614	-8.06748	-7.92082	-6.697	-6.92056	-1.26479	-4.5998
660	66481	AA832666	RIKEN cDNA 2410030A14 gene	2410030A14Rik	1.02183	0.959515	1.06969	1.17886	1.11314	1.1823	1.34146	1.21685		-6.92056	-4.37817	-1.26479	0.994332	0.693051	0.995593	1	0.999569
661		W83976			1.02569	1.04709	1.03477	1.13098	1.20128	1.20805	1.44398	1.06814		-7.50193	-6.11313	-7.00618	-0.581081	0.78156	0.825632	0.999968	-4.48892
662		W64037			1.02838	1.03899	0.953241	0.933465	0.922375	0.910694	0.997173	0.990391		-5.15301	-3.34811	-1.86049	0.129226	0.620649	0.857886	-8.14874	-7.74763
663	20377	AW011917	secreted frizzled-related sequence protein 1	Sfrp1	0.917933	0.954594	1.02407	1.02896	0.926461	0.942441	1.0168	0.935947		-0.821014	-4.65527	-7.08948	-6.65076	-1.4924	-3.19154	-7.63089	-2.44609
664		AA607397			1.18529	1.0302	0.989623	1.04474	1.11048	1.16934	1.21389	1.06841		-0.98372	-7.74763	-8.1301	-7.28693	-4.04755	-1.4924	-0.266568	-6.21444
665	60409	AA250067	trafficking protein particle complex 4	Trappc4	0.955342	0.947326	1.07389	1.00331	1.07077	0.962436	1.11704	1.04903		-2.16821	-1.12105	0.246823	-8.1301	0.0929952	-3.34811	0.968459	-1.90332
666	53319	AA125156	nuclear RNA export factor 1 homolog (S. cerevisiae)	Nxf1	0.990583	1.10834	1.0805	1.09685	1.08099	0.910883	1.11926	0.977372		-7.87549	0.770503	-0.0643457	0.55444	-0.0435591	0.574307	0.884622	-6.55683
667	69871	AA041846	RIKEN cDNA 2010007H12 gene	2010007H12Rik	1.03613	1.03801	1.00256	1.0343	1.0545	1.11254	1.34867	1.28123		-4.82161	-4.54435	-8.16368	-5.04284	-2.30557	0.811923	1	0.999999
668		T43360			0.97667	1.01098	1.03051	1.02588	0.940434	0.940611	1.05395	1.09761		-7.50193	-8.0361	-7.08948	-7.36136	-4.43352	-4.43352	-5.20794	-1.77597
669		T21166			0.998661	0.936298	1.04763	1.04025	0.718942	0.909128	0.814813	0.915784		-8.18614	-6.92056	-7.00618	-8.0361	0.918421	-7.20986	-0.668149	-5.69543
670		AF124205			1.15571	1.11604	0.904648	0.996275	0.865397	1.39322	1.03284	0.98992		-3.03724	-4.71073	-5.20794	-8.18239	-3.08841	0.834263	-7.77483	-8.14874
671		M33419			1.07428	1.00159	0.959819	1.02851	1.07156	0.977249	1.17612	1.10653		-2.68699	-8.18239	-5.80152	-6.96366	-2.93571	-7.36136	0.884622	-1.53173
672		M36771			0.982785	1.11708	1.01197	1.02153	0.952811	1.03016	1.0007	1.11077		-7.80123	-0.728124	-7.98239	-7.63089	-5.64203	-7.13023	-8.18614	-1.01745
673	19084	AA537355	protein kinase, cAMP dependent regulatory, type I, alpha	Prkar1a	0.923899	0.952693	0.94132	0.933928	0.956075	0.917303	0.910726	1.0617		0.336844	-2.30557	-2.39891	-0.266568	-2.83533	0.58395	0.746878	-0.98372
674	19124	AA672430	protein C receptor, endothelial	Procr	0.955094	0.961172	0.940672	0.963717	0.917519	0.978136	0.984615	1.02572		-2.54147	-3.50674	-0.728124	-3.93816	0.62937	-6.36363	-7.20986	-5.85418
675	18746	AA636642	pyruvate kinase, muscle	Pkm2	0.967941	1.00481	1.06859	1.2021	1.20476	1.10887	1.31321	1.88568		-6.01048	-8.1301	-2.07843	0.994332	0.995155	0.293028	0.999993	1
676	67117	AA636653	t-complex-associated-testis-expressed 1-like	Tcte1l	1.00684	0.938428	0.847025	0.855987	0.900372	0.845423	0.849549	1.02163		-8.10778	-3.29568	0.922724	0.865053	-0.219221	0.928786	0.909145	-7.43306
677		AA823833			1.03639	1.49214	1.09461	1.04985	1.06089	0.974246	1.01294	1.16852		-6.21444	1	-0.98372	-4.82161	-3.72108	-7.04813	-7.89858	0.875187
678	20068	AI225433	ribosomal protein S17	Rps17	0.993795	0.933894	1.17184	1.26537	1.17187	1.13406	1.29519	1.21043		-8.13988	-3.82931	0.662527	0.989483	0.662527	-0.106908	0.996792	0.911551
679	15425	W33293	homeo box C6	Hoxc6	0.975818	0.93188	0.982663	0.996846	0.991395	1.03087	0.96242	1.25771		-7.20986	-2.63816	-7.66125	-8.16976	-8.05224	-6.74275	-5.95867	0.997889
680	18582	W45989	phosphodiesterase 6D, cGMP-specific, rod, delta	Pde6d	0.930779	0.90748	0.872813	0.804374	0.84405	0.874949	0.842706	0.936871		-1.19212	0.293028	0.924796	0.999822	0.9925	0.911551	0.993375	-1.81803
681		W48168			0.989596	1.03876	1.04105	1.02171	1.17131	1.15581	1.16959	1.3522		-7.9422	-5.37197	-5.09798	-7.17036	0.970228	0.930706	0.96659	0.999999
682	19730	W48230	ral guanine nucleotide dissociation stimulator	Ralgds	0.941445	1.01259	1.02606	0.836412	0.932396	0.976663	0.931956	1.12622		-4.65527	-8.00117	-7.39756	0.71432	-3.82931	-7.53528	-3.77511	-0.497445
683	12867	W48245	cytochrome c oxidase, subunit VIIc	Cox7c	1.11131	1.02025	0.961938	0.981444	1.08853	1.08928	1.04861	1.16003		0.0555474	-7.43306	-5.69543	-7.53528	-1.05159	-1.01745	-4.71073	0.878407
684	97532	AA007791	RIKEN cDNA C230084J24 gene	C230084J24Rik	1.11499	1.18468	1.06692	0.974332	1.12128	0.938438	0.917837	0.996605		0.924796	0.999722	-0.497445	-5.80152	0.865053	-0.60972	0.58395	-8.13988
685	12461	AA003927	chaperonin subunit 2 (beta)	Cct2	1.07285	1.07932	1.12991	1.23276	1.1216	1.1479	1.10696	1.12233		-1.53173	-1.05159	0.770503	0.999376	0.654492	0.909145	0.322499	0.670398
686	67281	AA008895	ribosomal protein L37	Rpl37	1.02207	1.08132	1.05563	1.12226	1.08441	1.07381	1.19907	1.22919		-7.43306	-2.16821	-4.48892	0.0363594	-1.94654	-2.78558	0.953011	0.987757
687	69225	AA032328	RIKEN cDNA 2810407E01 gene	2810407E01Rik	1.0145	1.00764	0.953312	0.973924	0.978842	1.03925	0.926035	1.03749		-7.13023	-7.87549	-1.41493	-5.04284	-6.01048	-2.83533	0.670398	-3.13985
688	67281	AA008895	ribosomal protein L37	Rpl37	1.02765	1.06417	1.10099	1.1104	1.0911	1.13754	1.21609	1.22238		-7.32449	-4.48892	-1.69299	-1.15639	-2.35207	-0.0643457	0.918421	0.934405
689	14548	AA018028	ganglioside-induced differentiation-associated-protein 3	Gdap3	0.958359	0.97537	0.964882	0.962711	0.994654	0.946794	0.968766	1.04878		-3.72108	-6.31428	-4.76618	-4.43352	-8.09525	-2.12314	-5.37197	-3.03724
690	14972	AA017870	histocompatibility 2, K region	H2-K	0.999453	1.00032	1.001	0.999697	0.999562	0.999219	1.04571	0.999201		-8.18473	-8.18614	-8.18239	-8.18614	-8.18614	-8.18473	-2.58966	-8.18473
691	18626	AA051328	period homolog 1 (Drosophila)	Per1	0.809792	0.989585	0.940121	0.792311	0.889832	1.02745	0.925719	1.06776		0.293028	-8.1301	-6.31428	0.574307	-3.08841	-7.80123	-5.42635	-6.11313
692	23988	AA051390	protein (peptidyl-prolyl cis/trans isomerase) NIMA-interacting 1	Pin1	0.994968	0.926465	1.07232	1.04896	1.13403	0.942799	0.972457	1.01778		-8.1301	-1.15639	-1.73428	-4.1574	0.78156	-2.83533	-6.55683	-7.50193
693	17714	AI385511	GrpE-like 2, mitochondrial	Grpel2	1.3586	1.64889	1.37294	1.42564	1.31727	1.85056	1.42152	1.48465		0.996356	1	0.997748	0.999597	0.986185	1	0.999539	0.999941
694		AA073887			1.07003	1.04701	0.992869	0.937096	1.01089	0.903942	0.946732	0.977881		-1.57145	-4.04755	-8.05224	-1.81803	-7.87549	0.417659	-2.93571	-6.96366
695	12895	AA061685	carnitine palmitoyltransferase 1b, muscle	Cpt1b	1.02841	0.940748	0.975188	0.885868	0.945752	0.94921	1.00194	0.980676		-6.36363	-2.30557	-6.697	0.797251	-2.93571	-3.34811	-8.1749	-7.24872
696	100972	AI427886	RAB28, member RAS oncogene family	Rab28	1.0108	1.03318	1.16669	1.05059	1.15522	0.908173	1.03495	1.05364		-7.77483	-4.98763	0.997354	-2.49362	0.993578	0.721114	-4.71073	-2.12314
697	56691	AA066043	DnaJ (Hsp40) homolog, subfamily B, member 8	Dnajb8	0.916941	0.871053	0.870199	0.958299	1.01432	0.953939	0.918807	1.12047		-1.4924	0.620649	0.637916	-5.64203	-7.85157	-5.20794	-1.65208	-0.00296038
698	77605	AA039028	RIKEN cDNA C530002L11 gene	C530002L11Rik	0.895425	0.981439	0.850743	0.916259	0.814343	0.927838	0.91589	1.05571		0.322499	-7.50193	0.953011	-0.728124	0.997086	-1.69299	-0.728124	-3.77511
699	17896	AA051123	myosin, light polypeptide 4, alkali; atrial, embryonic	Myl4	0.944165	0.933589	0.926453	0.912643	0.962667	0.980282	0.963834	1.21863		-2.78558	-1.61157	-0.98372	-0.0435591	-5.20794	-7.24872	-5.37197	0.998706
700	319475	AA031146	RIKEN cDNA 4930488P06 gene	4930488P06Rik	1.01012	1.61248	1.32569	1.17154	1.38202	1.19277	1.19578	1.35264		-8.05224	1	0.999355	0.700291	0.999943	0.861512	0.875187	0.999803
701	18081	AA016456	ninjurin 1	Ninj1	0.962836	1.01115	1.07462	1.09961	0.987945	0.905744	0.973772	0.976206		-4.93234	-7.85157	-0.950385	0.336844	-7.77483	0.466765	-6.41257	-6.697
702	19943	AA049167	ribosomal protein L28	Rpl28	1.0803	1.02507	1.11102	1.26468	1.02381	1.06712	1.03037	1.08578		-5.15301	-7.82681	-3.40077	0.70738	-7.85157	-5.90657	-7.66125	-4.877
703	16923	AI429186	linker of T-cell receptor pathways	Lnk	0.960876	0.833284	0.898119	0.910942	0.836914	1.10835	0.950414	1.11498		-5.53458	0.983462	0.146893	-0.497445	0.978404	-0.0435591	-4.32287	0.181347
704		AA108260			0.905286	1.02569	0.907989	0.789301	0.830708	0.955322	0.951998	0.953085		-4.48892	-7.87549	-4.65527	0.430282	-0.60972	-7.24872	-7.08948	-7.13023
705	26446	AA108678	proteasome (prosome, macropain) subunit, beta type 3	Psmb3	0.979927	1.03255	1.06639	1.04571	1.0892	1.05262	1.01143	1.11459		-7.28693	-6.11313	-2.35207	-4.5998	-0.581081	-3.77511	-7.89858	0.430282
706	22335	AA042052	voltage-dependent anion channel 3	Vdac3	1.03832	1.00155	1.01918	1.04112	1.0841	1.01506	0.900525	1.02135		-4.93234	-8.17911	-7.20986	-4.5998	-0.315331	-7.5679	0.620649	-7.00618
707	14718	AA060494	glutamate oxaloacetate transaminase 1, soluble	Got1	0.898481	0.732808	0.718308	0.693658	0.600232	0.463328	0.603595	0.595855		-5.58841	0.364771	0.544209	0.752979	0.987757	0.999982	0.986185	0.989799
708	20525	AA050085	solute carrier family 2 (facilitated glucose transporter), member 1	Slc2a1	1.09264	1.24783	1.09717	1.13584	1.016	1.09177	1.32808	0.986034		-1.33906	0.995155	-1.05159	0.417659	-8.05224	-1.3768	0.999901	-7.87549
709	22365	AA060373	vacuolar protein sorting 45 (yeast)	Vps45	0.920374	0.985109	1.01056	0.952646	0.877599	0.995299	0.945961	1.0172		-2.30557	-7.87549	-8.0361	-5.48055	0.19814	-8.15667	-4.82161	-7.80123
710	66704	AA139442	RIKEN cDNA 4921506I22 gene	4921506I22Rik	1.0798	1.12691	0.977367	0.976876	0.986627	1.0191	1.0598	0.986826		0.322499	0.974993	-6.21444	-6.11313	-7.43306	-6.788	-0.98372	-7.46785
711		AA152754			0.977887	1.07187	1.05255	1.08443	1.02051	1.03548	1.06536	1.18512		-5.42635	0.637916	-0.497445	0.878407	-5.85418	-2.88538	0.4048	0.999998
712	22144	AA144835	tubulin, alpha 3	Tuba3	0.942237	1.15194	1.07401	1.02933	0.952767	0.960206	1.01356	0.976448		-3.56004	0.786907	-2.35207	-6.74275	-4.76618	-5.58841	-7.85157	-7.20986
713		AA152754			1.01987	1.16639	1.22487	1.23276	1.08396	1.01585	1.10938	1.59807		-7.28693	0.964618	0.998827	0.999287	-0.758696	-7.59978	0.364771	1
714	28113	AA209987	Terf1 (TRF1)-interacting nuclear factor 2	Tinf2	0.965998	1.05445	1.03128	0.951442	0.848897	0.981504	0.892886	1.10504		-7.20986	-6.06197	-7.39756	-6.31428	0.164266	-7.89858	-1.86049	-2.68699
715	12482	AA174292	membrane-spanning 4-domains, subfamily A, member 1	Ms4a1	0.955814	0.982109	0.979957	0.927485	0.895278	1.00891	0.960246	1.15503		-6.788	-7.9422	-7.87549	-4.82161	-2.44609	-8.1301	-7.04813	-0.789659
716	66254	AA199274	RIKEN cDNA 1500031M22 gene	1500031M22Rik	0.98983	1.01665	0.980649	0.991932	0.941743	0.952416	0.867759	0.947567		-8.09525	-7.96273	-7.87549	-8.1301	-5.69543	-6.46109	-0.60972	-6.11313
717	14083	AA146243	PTK2 protein tyrosine kinase 2	Ptk2	0.99472	1.06472	1.04322	1.06974	0.9916	0.918861	0.964405	0.977602		-8.09525	-1.30173	-3.82931	-0.852764	-7.96273	0.214648	-4.76618	-6.65076
718	18578	AA209984	phosphodiesterase 4B, cAMP specific	Pde4b	0.918233	0.860257	0.877275	0.882689	0.918247	0.996911	0.785111	0.862654		-5.80152	-2.63816	-3.56004	-3.82931	-5.64203	-8.18239	0.111261	-2.73613
719	18039	AA253725	neurofilament, light polypeptide	Nefl	1.12299	1.09603	0.98805	0.903308	0.932647	0.984968	0.867545	1.04605		-2.98634	-4.43352	-8.10778	-3.82931	-5.80152	-8.05224	-1.65208	-7.08948
720	242721	AA139621	RIKEN cDNA B230308G19 gene	B230308G19Rik	0.92567	0.981338	1.04062	0.976591	1.00406	0.862073	0.853704	0.994447		-4.54435	-7.92082	-7.00618	-7.74763	-8.1749	-0.497445	-0.173269	-8.16368
721	18039	AA253725	neurofilament, light polypeptide	Nefl	0.951852	0.957453	0.980899	0.83106	0.8521	0.958788	0.827909	1.06428		-7.24872	-7.46785	-8.0361	-1.15639	-2.07843	-7.50193	-1.05159	-6.74275
722		AA124030			0.975268	0.951789	0.964455	0.963272	1.03601	0.972635	0.988285	0.932644		-5.58841	-1.61157	-3.61353	-3.40077	-3.77511	-5.15301	-7.53528	0.214648
723	67817	AA137370			1.06316	1.03709	1.07365	1.10529	0.995245	1.07132	0.922646	1.04772		-2.73613	-5.64203	-1.77597	0.111261	-7.63089	-1.94654	-0.98372	-4.43352
724		AA242680			1.03727	1.03998	0.883367	0.936689	0.978971	0.884746	0.827957	0.943357		-5.53458	-5.20794	0.764789	-2.12314	-7.17036	0.746878	0.996238	-2.88538
725		AA242192			0.974166	1.03007	0.924409	0.936268	0.931644	0.999798	0.923276	1.08182		-6.96366	-6.65076	-1.61157	-2.78558	-2.30557	-8.18661	-1.53173	-1.61157
726	14431	AA222404	guanidinoacetate methyltransferase	Gamt	0.98104	1.07869	0.937886	0.952898	0.864933	0.912734	0.856222	1.05511		-7.00618	-0.196072	-1.08612	-2.93571	0.989799	0.501235	0.99573	-2.21364
727	20851	AA212445	signal transducer and activator of transcription 5B	Stat5b	0.907419	0.963784	1.01895	1.13162	0.979339	1.09351	1.08413	1.10129		0.816597	-4.04755	-6.83272	0.978404	-6.55683	0.678108	0.417659	0.807142
728	74104	AA212806	ATP-binding cassette, sub-family B (MDR/TAP), member 6	Abcb6	1.04156	1.09432	1.04261	1.07125	0.983273	1.11621	1.00508	1.12988		-6.55683	-2.58966	-6.50918	-4.32287	-7.87549	-1.30173	-8.15667	-0.697942
729	66542	AA139624			1.06831	1.26458	0.868318	1.30204	1.13171	1.07983	1.21072	1.08577		-6.21444	0.489964	-2.07843	0.752979	-2.98634	-5.64203	-0.290771	-5.31743
730	18663	AA145650	phosphoglycerate kinase 2	Pgk2	1.0224	1.02573	1.01151	0.947509	0.948388	0.945607	0.963089	1.00075		-7.53528	-7.32449	-8.00117	-4.93234	-4.98763	-4.71073	-6.41257	-8.18614
731	15194	AA250402	Huntington disease gene homolog	Hdh	0.958303	1.03946	1.03152	0.966519	0.994653	0.989815	0.906014	1.0585		-5.15301	-5.58841	-6.41257	-6.11313	-8.1301	-7.98239	-0.12869	-3.50674
732	12234	AA230588	beta-transducin repeat containing protein	Btrc	0.957951	1.22836	1.21112	1.13504	1.15328	1.05091	0.934516	1.17238		-3.61353	0.999964	0.999865	0.961454	0.989158	-2.63816	-0.697942	0.997354
733	252870	AA242262	ubiquitin specific protease 7	Usp7	1.06143	0.998515	1.03239	1.00842	0.977107	0.945712	1.03971	0.95419		-2.25943	-8.17911	-5.80152	-8.00117	-6.83272	-2.68699	-4.877	-3.77511
734	66542	AA139624			1.00532	1.06575	0.942446	1.01026	0.997026	1.06853	1.1397	1.04686		-8.09525	-1.19212	-1.65208	-7.85157	-8.15667	-0.950385	0.964618	-3.34811
735	56296	AA144949	DMRT-like family B with proline-rich C-terminal, 1	Dmrtb1	1.00909	1.03519	0.966734	0.92728	1.00037	0.910102	0.949128	1.10348		-8.09525	-6.92056	-6.96366	-3.61353	-8.18614	-2.16821	-5.58841	-1.86049
736		AA237207			0.977317	1.11364	0.986979	1.00386	0.964548	1.01212	1.03799	0.979568		-7.28693	-0.0643457	-7.87549	-8.15667	-6.16396	-7.9422	-6.01048	-7.46785
737	14824	AA242654	granulin	Grn	0.823932	0.838147	0.837559	0.815713	0.816103	0.874044	0.75139	0.917255		0.850375	0.71432	0.721114	0.898907	0.896187	-0.150809	0.997597	-2.83533
738	56296	AA144949	DMRT-like family B with proline-rich C-terminal, 1	Dmrtb1	1.00207	0.956809	0.919684	0.922661	0.904373	0.879783	0.857112	1.013		-8.17911	-5.37197	-1.57145	-1.81803	-0.497445	-0.150809	0.846486	-7.89858
739	18286	AA140320	outer dense fiber of sperm tails 2	Odf2	0.996881	0.963283	0.999976	0.938308	0.967392	0.951068	1.0384	1.14393		-8.17911	-7.04813	-8.18661	-5.26275	-7.28693	-6.21444	-7.00618	-0.728124
740	67444	AA231522	RIKEN cDNA 0710007A14 gene	0710007A14Rik	0.97421	1.05842	1.04398	0.971282	1.00014	0.943742	0.899175	0.95173		-5.15301	-0.443569	-2.12314	-4.5998	-8.18661	-0.340251	0.976414	-1.22825
741		AA237290			0.957908	0.909637	1.01601	0.916883	1.03371	0.913942	0.951065	1.00693		-4.877	-0.150809	-7.63089	-0.581081	-6.06197	-0.391177	-4.04755	-8.08182
742	114143	AA238482	ATPase, H+ transporting, V0 subunit B	Atp6v0b	1.05757	1.03627	1.05995	1.0971	1.11742	0.989425	0.964801	1.08699		-0.581081	-3.45365	-0.365532	0.904152	0.983462	-7.59978	-3.40077	0.786907
743		AA217989			1.03397	1.06147	1.05411	0.931106	1.00145	1.03166	0.92792	1.10596		-7.20986	-5.42635	-5.95867	-4.54435	-8.18473	-7.32449	-4.26763	-2.39891
744	11629	AA245272	allograft inflammatory factor 1	Aif1	0.935898	1.05986	1.104	1.04747	1.0454	0.926045	0.975405	1.11561		-5.42635	-5.95867	-3.13985	-6.697	-6.83272	-4.65527	-7.71962	-2.49362
745	14964	AA221044	histocompatibility 2, D region locus 1	H2-D1	1.00162	1.00031	0.938223	1.00044	1.00078	0.994897	0.998085	0.963578		-8.17911	-8.18614	-1.57145	-8.18614	-8.18473	-8.10778	-8.1749	-4.93234
746	26425	AA220463	nucleotide binding protein 1	Nubp1	0.855806	1.03005	0.99323	0.937104	0.656675	0.715429	0.809704	0.906067		0.230875	-7.36136	-8.13988	-4.877	0.999993	0.999507	0.884622	-2.30557
747		AA217989			0.942949	1.00483	1.02002	0.918719	0.84316	0.99927	0.901392	1.12584		-5.04284	-8.16368	-7.74763	-2.88538	0.662527	-8.18614	-1.57145	-0.758696
748	16478	AA241105	Jun proto-oncogene related gene d1	Jund1	0.910534	0.915845	1.36776	1.01446	1.01662	1.173	0.91672	0.791927		-5.20794	-5.53458	0.838432	-8.10778	-8.08182	-2.03409	-5.58841	0.0929952
749	17149	AA254528	mago-nashi homolog, proliferation-associated (Drosophila)	Magoh	0.948279	0.944947	1.00722	1.04796	1.02384	0.970793	0.949367	0.995422		-2.93571	-2.54147	-8.0361	-3.72108	-6.74275	-6.06197	-3.08841	-8.1301
750	15115	AI608026	histidyl-tRNA synthetase	Hars	1.06555	1.12337	1.15638	1.25042	1.14257	1.09781	1.05543	1.07233		-2.98634	0.378359	0.842506	0.998572	0.71432	-0.581081	-4.04755	-2.35207
751	13627	AA259551	eukaryotic translation elongation factor 1 alpha 1	Eef1a1	0.988236	1.02974	1.11282	1.0525	0.94429	0.938802	1.05392	1.15244		-7.9422	-6.788	-0.150809	-4.5998	-3.93816	-3.34811	-4.48892	0.740644
752	76238	AA276224	glyoxylate reductase/hydroxypyruvate reductase	Grhpr	1.40302	1.05788	0.870843	0.974273	0.913497	0.968392	0.917226	0.924016		0.884622	-7.04813	-3.19154	-7.92082	-5.53458	-7.80123	-5.7486	-6.11313
753	56486	AA272212	gamma-aminobutyric acid receptor associated protein	Gabarap	1.07795	0.941226	1.10188	1.04041	1.04054	1.0127	1.01942	1.05792		-4.82161	-5.85418	-3.34811	-7.08948	-7.08948	-8.06748	-7.92082	-6.11313
754	12745	AA285509	calmegin	Clgn	0.981656	1.0921	1.15638	1.07094	1.08113	0.907887	0.908626	1.08932		-7.98239	-4.5998	-1.45347	-5.80152	-5.20794	-4.04755	-4.10242	-4.76618
755	12745	AA285509	calmegin	Clgn	0.953323	0.87151	0.857125	0.891473	0.944125	0.991922	0.887675	0.928781		-6.16396	-0.290771	0.19814	-1.30173	-5.42635	-8.1194	-1.08612	-4.1574
756	68961	AA266813	5phosphorylase kinase, gamma 2 (testis)	Phkg2	1.03773	0.998155	1.0596	0.938987	1.0521	1.02113	1.00941	1.15788		-6.83272	-8.18239	-5.26275	-4.877	-5.85418	-7.74763	-8.09525	0.129226
757	110954	AA286316	ribosomal protein 10	Rpl10	1.04558	1.0077	1.22095	1.2222	1.08015	1.20183	1.22023	1.19317		-3.88366	-8.01908	0.999703	0.999722	-0.47032	0.998865	0.999682	0.997956
758	13194	AA266564	damage specific DNA binding protein 1	Ddb1	1.04202	1.17167	1.08717	1.06716	0.966285	0.971104	0.949154	1.06704		-6.92056	-0.0643457	-3.93816	-5.31743	-7.28693	-7.50193	-6.21444	-5.31743
759	13047	AA261063	cut-like 1 (Drosophila)	Cutl1	1.00188	0.977253	0.919663	0.85938	0.930497	0.990339	0.852931	0.990879		-8.18473	-7.9422	-5.48055	-1.90332	-6.11313	-8.13988	-1.69299	-8.14874
760	19085	AA270948	protein kinase, cAMP dependent regulatory, type I beta	Prkar1b	1.07713	1.04626	0.98581	1.14549	1.12713	1.1561	1.17328	1.13087		-1.05159	-4.21247	-7.66125	0.918421	0.78156	0.954315	0.983462	0.821166
761	20775	AA268608	squalene epoxidase	Sqle	1.03407	0.965757	1.05375	0.767065	0.949583	1.04269	0.705711	0.895106		-7.71962	-7.66125	-7.04813	0.602668	-7.08948	-7.46785	0.950298	-4.1574
762	27425	AA269701	ATP synthase, H+ transporting, mitochondrial F0 complex, subunit g	Atp5l	1.01178	1.02857	1.0476	1.02449	1.06172	0.846773	0.973105	1.07328		-8.09525	-7.66125	-6.83272	-7.80123	-6.06197	-0.266568	-7.69083	-5.37197
763	66475	AA270534	ribosomal protein S23	Rps23	1.07559	1.01323	1.01052	1.01678	1.01161	1.09457	1.08991	1.21147		-4.1574	-8.01908	-8.08182	-7.92082	-8.05224	-2.78558	-3.13985	0.786907
764	19085	AA270948	protein kinase, cAMP dependent regulatory, type I beta	Prkar1b	0.953948	1.04509	0.948064	0.963673	0.9596	0.859812	0.908297	1.08569		-5.37197	-5.69543	-4.76618	-6.36363	-5.95867	0.721114	-1.08612	-2.07843
765	66171	AA276345	6-phosphogluconolactonase	Pgls	1.02267	0.933965	1.07972	0.933013	0.951935	0.993395	0.963345	1.1676		-6.92056	-1.41493	-0.728124	-1.30173	-3.56004	-8.06748	-5.09798	0.981916
766		TRZ503			0.967226	1.07006	0.993088	0.877903	0.897721	0.929949	0.88374	1.06845		-6.83272	-3.72108	-8.1749	0.146893	-0.758696	-3.29568	-0.085461	-3.88366
767	21945	AA471746	death effector domain-containing	Dedd	0.991458	1.10125	1.12219	0.997399	1.00902	0.945006	0.973805	1.06725		-16.0204	0.747164	0.95049	-16.6071	-15.9728	-2.75034	-11.4613	-1.3444
768	14866	AA461810	glutathione S-transferase, mu 5	Gstm5	1.10239	1.1078	1.10181	0.90817	1.16459	0.982933	0.998087	1.06069		-1.82724	-1.3444	-1.87939	-1.93227	0.753658	-15.6545	-16.6503	-7.87123
769	11832	AA500661	aquaporin 7	Aqp7	0.996543	0.963946	0.942931	0.771729	0.802413	0.925651	0.847348	1.01061		-16.6503	-15.2826	-13.2534	0.619757	-0.0482874	-11.2525	-2.44128	-16.5354
770	21945	AA471746	death effector domain-containing	Dedd	0.972241	0.975864	0.939953	0.841671	0.808694	0.939783	0.900542	1.02256		-14.8612	-15.2157	-9.23519	0.664713	0.945976	-9.23519	-2.81444	-15.4123
771		AA426845			0.959661	0.913987	0.959868	0.85601	0.841875	0.928782	0.875759	1.01478		-14.6334	-9.02291	-14.7105	-2.38175	-1.3444	-11.0425	-4.25767	-16.4063
772	15275	AA451263	hexokinase 1	Hk1	1.00432	0.90829	0.854382	0.902504	0.830927	0.887814	0.98085	0.921272		-16.4632	0.921546	0.999935	0.959679	0.999998	0.993426	-12.8724	0.697159
773		AI508884		ESTs	0.917332	0.937062	0.940633	0.900783	0.871265	1.06708	1.01738	0.960121		-3.14645	-6.66521	-7.46211	-1.17033	0.489042	-6.66521	-15.6545	-11.6687
774	268449	AA473164	similar to 60S ribosomal protein L23a	na	1.03207	1.04679	1.13234	1.16911	0.980038	1.02121	1.11751	1.17974		-14.7865	-12.9688	-2.32296	-0.302747	-15.8729	-15.8206	-3.57028	0.0192658
775	73545	AA465846	RIKEN cDNA 1700094D03 gene	1700094D03Rik	0.910416	0.921758	0.951742	0.954346	0.973706	0.978861	0.97729	1.02917		-4.17827	-5.99572	-11.5652	-11.9767	-15.0069	-15.5363	-15.4123	-14.7105
776	68153	AA412879	general transcription factor II E, polypeptide 2 (beta subunit)	Gtf2e2	1.02731	1.0882	0.945824	0.964505	0.936537	0.834377	0.956803	0.993828		-15.7667	-9.7677	-13.1593	-15.0778	-12.0784	-0.928564	-14.3949	-16.6206
777	13494	AA275913	developmentally regulated GTP binding protein 1	Drg1	0.936277	0.972673	1.00221	1.01029	0.96417	0.945582	0.951422	1.02939		-1.25605	-11.1476	-16.6206	-15.7667	-8.18193	-2.94494	-4.33782	-10.7256
778	17002	AA474964	lactotransferrin	Ltf	0.985105	1.01725	0.952145	0.946813	0.967038	1.03119	1.04031	1.0179		-14.7865	-14.3131	-4.50035	-3.14645	-9.12898	-10.0876	-7.15969	-14.1463
779	23897	AA472437	HS1 binding protein	Hs1bp1	0.964535	0.980833	1.14791	1.15746	1.11163	1.16289	1.18998	1.08905		-11.6687	-15.0778	0.795021	0.873868	-0.169681	0.907072	0.979152	-1.93227
780	26441	AA277958	proteasome (prosome, macropain) subunit, alpha type 4	Psma4	0.962465	1.02514	1.01725	0.991309	0.946361	1.0028	0.98503	1.1007		-9.55449	-13.2534	-14.9347	-16.1947	-5.17941	-16.6206	-15.2826	0.181448
781	56772	AA275865	expressed sequence AI839562	AI839562	0.930197	0.989378	0.951378	0.84059	0.839788	0.978509	0.929652	0.9806		-5.71777	-16.3081	-10.0876	0.893143	0.898933	-15.1474	-5.62639	-15.4123
782		AA498356			0.894979	1.07242	1.03022	0.929037	0.907732	1.04027	1.12651	1.14736		0.181448	-4.02172	-12.9688	-3.3549	-0.640414	-10.7256	0.463737	0.815696
783	20166	AI098267	rhotekin	Rtkn	1.05499	0.977783	0.892086	0.982971	0.905364	0.91673	0.952019	1.0431		-8.28615	-14.7865	-0.0954937	-15.5363	-1.0872	-2.38175	-9.23519	-10.8315
784	12516	AA475638	CD7 antigen	Cd7	1.18256	0.878936	0.982205	0.930425	0.881104	0.986217	0.870712	0.976026		-3.28465	-6.56787	-16.3753	-12.4802	-6.76309	-16.489	-5.62639	-16.1536
785		AA497590			0.911404	0.96983	0.989333	1.10974	0.881843	0.987309	1.02359	1.06523		-1.3444	-13.0644	-16.1947	-0.418126	0.51328	-15.9728	-14.4755	-5.80979
786	59008	AA498565	anaphase-promoting complex subunit 5	Anapc5	0.943239	1.0312	1.14275	1.11496	0.876838	1.08354	0.925827	1.10872		-14.2302	-15.9728	-7.36086	-9.66107	-7.46211	-12.3806	-12.6776	-10.1942
787	16195	AA543149	interleukin 6 signal transducer	Il6st	0.968825	0.966592	1.11201	1.13925	0.965093	1.17378	1.03543	1.05848		-14.7865	-14.555	-4.17827	-1.82724	-14.3131	-0.144493	-14.3949	-11.357
788	59008	AA498565	anaphase-promoting complex subunit 5	Anapc5	0.923592	0.976771	0.982274	0.897498	0.792915	0.797072	0.951728	1.13392		-7.87123	-15.5961	-16.0664	-3.94457	0.91929	0.800381	-12.4802	-2.20763
789	103067	AA522020	expressed sequence AA522020	AA522020	1.07013	1.09206	1.1221	1.16238	0.895824	1.15693	1.04782	1.08902		-10.6196	-7.66588	-4.33782	-1.3444	-4.91942	-1.67505	-13.4392	-8.07803
790	21858	AA518165	tissue inhibitor of metalloproteinase 2	Timp2	0.967251	0.983841	1.05944	0.975971	0.872841	0.874014	0.940383	1.00426		-12.9688	-15.7113	-7.87123	-14.6334	0.525011	0.489042	-7.0598	-16.5918
791	22027	AA498066	tumor rejection antigen gp96	Tra1	0.951427	1.00491	1.02212	0.926159	0.816884	0.955178	0.940962	1.02113		-12.3806	-16.6206	-15.7667	-8.28615	0.733705	-12.9688	-10.7256	-15.8206
792		AA537645			1.00531	0.988789	0.969828	0.989274	0.916261	0.971574	0.842534	1.02235		-16.6323	-16.5354	-15.7667	-16.556	-10.5134	-15.8729	-2.56263	-16.1947
793	23960	AA290052	2'-5' oligoadenylate synthetase 1G	Oas1g	0.960442	0.994274	0.880086	0.834216	0.975527	0.918794	1.05504	1.09763		-13.9753	-16.6071	-2.50158	0.235982	-15.5961	-7.56379	-12.1797	-6.37484
794	234847	AI507593	spastic paraplegia 7 homolog (human)	Spg7	0.913112	1.02359	0.965051	0.991225	0.747553	0.753436	0.966367	1.27981		-4.50035	-15.2826	-13.3467	-16.4632	0.999429	0.999113	-13.8003	0.992993
795	23960	AA290052	2'-5' oligoadenylate synthetase 1G	Oas1g	1.01634	0.954904	0.923367	0.792641	0.792566	0.847208	0.814463	0.959721		-16.3425	-14.1463	-10.0876	0.558707	0.558707	-1.52921	0.0409395	-14.6334
796	55978	AA274119	RIKEN cDNA 0610009H04 gene	0610009H04Rik	0.937728	0.954388	0.961408	0.853493	0.814576	0.916187	0.913401	1.04989		-11.4613	-13.7114	-14.4755	-1.29989	0.366219	-8.28615	-7.87123	-13.4392
797	50911	AA217904	polymyositis/scleroderma autoantigen 1	Pmscl1	0.808051	0.998732	1.12575	0.991269	0.830011	1.06494	1.05698	1.10788		-0.448263	-16.6638	-6.9604	-16.5918	-1.57713	-13.0644	-13.8003	-8.70578
798	50911	AA217904	polymyositis/scleroderma autoantigen 1	Pmscl1	1.01598	1.08004	1.03303	0.934817	1.04083	1.03529	1.06969	1.00854		-15.0778	-1.17033	-11.0425	-2.50158	-8.91701	-10.4071	-2.50158	-16.1947
799	11450	AA493090	adipocyte complement related protein	Acrp30	1.0341	1.01841	0.868739	0.941269	1.0304	0.988418	0.992906	0.965288		-11.6687	-15.0069	0.907072	-5.17941	-12.5793	-15.9728	-16.4063	-11.2525
800	234847	AI507593	spastic paraplegia 7 homolog (human)	Spg7	0.916814	0.908991	0.861501	0.870424	0.716773	0.925057	0.920631	0.939114		-5.80979	-4.58271	-0.169681	-0.640414	0.999789	-7.15969	-6.47108	-9.66107
801	71902	AA611688	DNA segment, Chr 10, ERATO Doi 516, expressed	D10Ertd516e	0.841324	0.902748	0.859107	0.791721	0.77491	0.865762	0.926383	0.957892		0.525011	-3.64361	-0.0253416	0.966245	0.988398	-0.359416	-7.36086	-12.8724
802	20677	AA612510	SRY-box containing gene 4	Sox4	0.912573	1.07279	1.07011	1.0508	0.782242	0.782682	1.02855	1.29628		-4.58271	-7.87123	-8.39066	-11.5652	0.98803	0.987651	-14.7865	0.994214
803	71879	AA521959	fatty acid Coenzyme A ligase, long chain 5	Facl5	1.03293	1.09547	1.0073	1.0182	0.977497	0.90696	0.871973	0.963359		-15.2157	-9.02291	-16.5918	-16.1947	-15.9236	-7.0598	-2.8793	-14.7105
804		AA615692		ESTs, Highly sim	0.881129	1.08898	0.9475	0.992544	0.937141	0.974052	1.00775	0.898041		0.947522	0.199989	-3.94457	-16.2342	-1.82724	-11.9767	-16.1947	0.847323
805		AA501244			0.966877	0.905113	0.927327	0.849996	0.8323	0.994216	0.860982	0.862652		-15.9728	-11.5652	-13.5308	-6.1841	-4.66581	-16.6422	-7.26004	-7.36086
806		AA517991			1.05882	0.999999	0.984723	0.894872	0.92195	0.981593	0.823216	1.04476		-11.7718	-16.6647	-16.2342	-4.25767	-8.18193	-16.0664	0.489042	-13.6216
807	13506	AA500580	desmocollin 2	Dsc2	0.9759	0.993274	1.02692	1.0808	1.03168	1.17841	1.1477	1.08503		-12.0784	-16.272	-11.357	0.0192658	-9.87435	0.999691	0.995072	0.270557
808	20255	AA543702	secretogranin III	Scg3	0.993667	1.02474	0.9705	1.09753	0.987746	1.07014	1.01282	0.993505		-16.489	-14.3131	-13.2534	-1.48199	-16.0204	-5.09205	-16.3081	-16.489
809		AA794084			0.933248	1.06118	0.966723	0.878426	0.948127	0.982988	1.06603	0.950229		-6.86149	-8.70578	-13.5308	-0.144493	-9.87435	-15.7667	-7.87123	-10.3007
810	11650	AA561933	alkaline phosphatase 5	Akp5	0.990365	1.07638	0.999303	0.957236	0.858606	0.956554	0.891625	1.04376		-16.489	-8.91701	-16.6638	-13.3467	-0.574164	-13.2534	-3.3549	-13.4392
811	78294	AA727759	ribosomal protein S27a	Rps27a	0.980385	1.04159	1.04641	0.975532	0.933208	0.998621	1.1002	1.07642		-14.6334	-9.66107	-8.39066	-13.6216	-3.21516	-16.6566	-0.221464	-2.50158
812		AA734806			1.04727	1.07091	1.1435	0.926402	1.07426	0.975755	1.014	1.01089		-15.3481	-13.9753	-8.39066	-13.3467	-13.7114	-16.3081	-16.5354	-16.5918
813		AA794084			0.944131	0.987299	0.92889	0.938312	0.902483	0.949539	1.0255	1.01557		-0.448263	-14.555	0.673106	0.143245	0.987261	-1.29989	-9.7677	-13.6216
814	18750	AA590683	protein kinase C, alpha	Prkca	1.07497	1.19797	0.982935	0.980347	1.04963	0.95909	1.10727	1.22426		-7.76836	0.712291	-15.9728	-15.7667	-11.8745	-12.9688	-3.42592	0.887046
815	22629	AA879811	tyrosine 3-monooxygenase/tryptophan 5-monooxygenase activation protein, eta polypeptide	Ywhah	1.00654	1.03996	0.951802	0.992514	0.937756	0.909799	1.00869	1.21702		-16.5131	-11.7718	-9.66107	-16.4632	-6.47108	-4.33782	-16.272	0.970045
816	66286	AA592658	RIKEN cDNA 1810029G24 gene	1810029G24Rik	1.00618	1.06941	0.99341	0.971076	0.926428	0.981271	0.982828	1.08621		-16.489	-4.83417	-16.4632	-13.2534	-3.21516	-15.1474	-15.3481	-2.32296
817		AA638454			0.951299	0.91683	0.989681	0.975164	0.842771	0.936367	0.924175	1.05159		-12.8724	-7.56379	-16.489	-15.5961	-0.169681	-10.6196	-8.70578	-12.7754
818	54188	AA616057	cleavage and polyadenylation specific factor 4	Cpsf4	1.0214	0.957868	0.910435	0.95039	0.939027	1.05778	1.09147	1.31764		-13.3467	-6.56787	0.610141	-4.41872	-1.93227	-3.21516	0.381042	1
819	13001	AA681604	casein kinase II, beta subunit	Csnk2b	0.976166	0.953452	0.988054	1.03371	0.962435	0.966208	1.03854	1.04648		-13.5308	-7.36086	-15.8206	-11.2525	-9.87435	-10.9371	-9.981	-7.87123
820	19179	AA645829	protease (prosome, macropain) 26S subunit, ATPase 1	Psmc1	0.967105	0.936612	0.958204	1.02399	0.976803	1.00704	1.00598	1.02986		-9.55449	-1.57713	-6.66521	-12.5793	-12.6776	-16.272	-16.3753	-10.8315
821	12525	AA839138	CD8 antigen, alpha chain	Cd8a	1.02899	0.929472	0.951828	0.994236	0.966579	1.05185	1.07986	1.04605		-12.0784	-1.62574	-6.27918	-16.4356	-10.5134	-5.99572	-1.17033	-7.46211
822	16542	AA871757	kinase insert domain protein receptor	Kdr	0.960096	0.918716	0.905853	0.968601	0.906544	0.999966	1.15502	1.00545		-11.9767	-3.14645	-1.98588	-13.6216	-2.04021	-16.3425	0.536489	-16.5748
823		AA681604			0.941028	0.913256	0.926594	0.913208	0.85644	0.95559	0.984008	1.07819		-10.3007	-5.62639	-7.76836	-5.62639	-0.0954937	-12.7754	-16.1108	-7.97445
824	18203	AA763991	N-terminal Asn amidase	Ntan1	0.988405	0.986872	0.956437	0.98632	0.954796	1.01867	0.989952	0.973211		-15.9236	-15.7113	-8.39066	-15.5961	-7.97445	-14.7865	-16.1108	-12.9688
825	67115	AA798998	RIKEN cDNA 3100001N19 gene	3100001N19Rik	1.07285	1.05165	1.18548	1.13716	1.03609	0.833037	0.880701	1.07202		-11.9767	-14.0613	-2.09528	-5.44559	-15.3481	-1.38959	-5.62639	-12.0784
826	18203	AA763991	N-terminal Asn amidase	Ntan1	1.00543	0.858927	1.15034	0.888686	0.978073	0.927602	0.815833	1.0806		-16.6206	-2.32296	-3.21516	-5.35619	-16.0204	-10.6196	0.062201	-10.3007
827	23880	AI049453	FYN binding protein	Fyb	0.927438	1.04012	1.08	1.01512	0.822645	0.804946	1.07686	1.79727		-9.12898	-14.1463	-8.91701	-16.272	0.476525	0.753658	-9.34152	1
828	14229	AI180957	FK506 binding protein 5	Fkbp5	0.942662	1.02401	1.03582	0.952418	0.836556	0.879744	1.18129	1.99786		-12.6776	-15.9236	-15.1474	-13.8003	-0.852957	-4.41872	-1.43545	1
829	57431	AI180850	DnaJ (Hsp40) homolog, subfamily C, member 4	Dnajc4	0.94605	0.972476	0.953806	0.944124	0.922905	1.0098	1.08574	1.10465		-2.8793	-10.9371	-4.83417	-2.44128	0.181448	-15.8206	0.303759	0.820556
830		AA798637			0.957466	0.993036	1.00034	0.984406	0.976707	1.10031	1.05181	1.08915		-8.49545	-16.3753	-16.6638	-15.2826	-13.7114	-0.0253416	-6.66521	-0.744053
831	23880	AI049453	FYN binding protein	Fyb	0.981465	0.970069	1.11636	1.23925	1.15257	1.23626	1.30274	1.17703		-14.9347	-12.3806	0.409777	0.999712	0.921546	0.999646	0.999996	0.982647
832	20677	W14398	SRY-box containing gene 4	Sox4	1.02764	1.08079	1.0374	1.04311	1.07485	1.13643	1.08745	1.1145		-9.55449	0.638353	-5.99572	-4.25767	0.39556	0.998534	0.795021	0.985125
833	57431	AI180850	DnaJ (Hsp40) homolog, subfamily C, member 4	Dnajc4	0.947414	0.908126	0.893044	0.895316	0.910251	0.941936	0.910023	0.944098		-4.25767	0.558707	0.873868	0.847323	0.476525	-3.01134	0.489042	-3.49772
834	320585	AA881641	RIKEN cDNA 5730405G21 gene	5730405G21Rik	1.07026	0.837138	0.810996	0.753738	0.746633	0.83187	0.894839	0.888709		-8.39066	0.697159	0.927964	0.998326	0.998985	0.772239	-2.32296	-1.72507
835	22248	AA833322	unc-119 homolog (C. elegans)	Unc119	1.063	0.759608	0.725674	0.716741	0.699908	0.786386	0.910474	0.805374		-11.8745	0.944386	0.990684	0.994397	0.997957	0.805611	-7.46211	0.569454
836	1509	AA770764	cathepsin D (lysosomal aspartyl protease)	CTSD	1.07581	1.00708	1.05365	0.99511	0.924543	1.06738	0.973119	1.14544		-12.2804	-16.6206	-14.1463	-16.6422	-11.6687	-13.0644	-15.9728	-5.62639
837		AA882121			0.945825	1.00209	1.05134	1.10042	1.05872	0.937926	0.952412	1.04093		-4.09962	-16.6323	-5.44559	0.463737	-3.79256	-2.44128	-5.80979	-8.18193
838	27176	AA795887	ribosomal protein L7a	Rpl7a	1.03334	1.08201	1.00644	0.966121	0.913257	0.983247	1.09811	0.941707		-10.4071	-0.51013	-16.3753	-9.87435	0.287327	-14.7105	0.409777	-3.14645
839	19898	AA896365			1.03651	1.01249	0.921346	0.855547	0.833418	0.952014	0.979446	0.968383		-13.8003	-16.3081	-6.08961	0.270557	0.747164	-11.6687	-15.6545	-14.3131
840		AA896773			0.941877	1.02454	1.06026	0.997348	0.829761	0.8831	1.22762	1.90883		-13.1593	-16.0204	-13.3467	-16.6566	-1.25605	-5.90245	-0.51013	1
841	12857	AA711266	cytochrome c oxidase subunit IV isoform 1	Cox4i1	0.815399	0.758567	1.24267	0.968063	0.939294	1.11558	1.03089	0.845371		-5.00539	-1.52921	-4.25767	-16.1947	-14.9347	-11.8745	-16.2342	-7.46211
842	19357	AA546839	RAD21 homolog (S. pombe)	Rad21	1.05045	1.03732	0.925247	1.00439	0.914599	0.981027	1.14556	1.08512		-6.47108	-9.981	-1.21286	-16.5354	-0.169681	-14.4755	0.951914	-0.779762
843	57296	AA596572	proteasome (prosome, macropain) 26S subunit, non-ATPase, 8	Psmd8	0.976088	0.861335	0.907442	0.983474	0.957674	1.00488	1.03966	1.07868		-13.6216	0.969135	0.0192658	-15.1474	-8.70578	-16.5354	-9.87435	-1.93227
844	68222	AA760262	4931415M17 mRNA	4931415M17	1.00003	0.900088	0.96771	0.976611	0.9229	0.82551	1.03931	1.06496		-16.6647	-8.39066	-15.5961	-16.1108	-11.1476	-1.29989	-15.2157	-13.0644
845	57296	AA596572	proteasome (prosome, macropain) 26S subunit, non-ATPase, 8	Psmd8	1.03927	0.962196	0.957163	1.01501	1.03952	1.19118	1.10541	1.08501		-11.6687	-10.3007	-10.5134	-16.556	-13.8883	0.960851	-0.816061	-5.44559
846	105892	AI060382	expressed sequence AI789751	AI789751	0.950057	1.03583	0.972088	0.888444	0.916728	0.875451	1.01192	1.06977		-10.8315	-13.6216	-14.6334	-1.25605	-4.66581	-0.33083	-16.272	-7.87123
847	67471	AI120460	RIKEN cDNA 1300003A17 gene	1300003A17Rik	0.997322	1.07998	1.17903	1.48077	1.33281	1.44383	1.39799	1.52623		-16.6206	-0.967286	0.997428	1	1	1	1	1
848	19718	AA896210	replication factor C (activator 1) 2	Rfc2	1.00154	1.01251	1.00216	1.10693	1.05168	1.16221	1.21387	1.24345		-16.6422	-15.475	-16.6323	0.76	-4.74963	0.996766	0.999961	0.999997
849	102247	AA967122	expressed sequence AU041707	AU041707	0.918324	0.9174	0.82414	0.807023	0.761897	0.740655	0.884459	0.713064		-3.3549	-3.28465	0.972624	0.992534	0.999828	0.999975	-0.0716694	0.999998
850	53415	AI020875	HIV-1 tat interactive protein 2, homolog (human)	Htatip2	1.00586	1.1627	1.01883	1.0096	1.01842	1.039	1.20598	0.925865		-16.5354	0.766193	-15.4123	-16.3425	-15.475	-12.0784	0.970929	-4.33782
851	12055	AI118629	B-cell CLL/lymphoma 7C	Bcl7c	0.910601	0.839274	0.877162	0.807583	0.751002	0.767023	0.728354	0.620057		-3.21516	0.83884	-0.144493	0.978508	0.999712	0.998951	0.999959	1
852	22789	AA874235	zona pellucida 3 receptor	Zp3r	0.983654	0.991658	0.974191	0.904258	0.936822	1.0499	0.996836	0.994227		-16.0204	-16.489	-15.1474	-3.7177	-9.02291	-11.8745	-16.6422	-16.5918
853	12326	AI153488	calcium/calmodulin-dependent protein kinase IV	Camk4	1.00704	0.971704	0.927189	0.91049	0.958007	1.01007	1.09252	1.10689		-16.3081	-11.6687	-0.852957	0.39556	-7.36086	-15.9728	0.143245	0.64734
854		AI158410			1.02196	0.986173	1.00224	1.07817	1.01536	1.1287	1.16092	1.11759		-11.0425	-14.0613	-16.5918	0.76	-13.6216	0.999113	0.999983	0.996659
855		AI156457			0.943304	1.00204	0.925464	0.968636	0.864651	1.0508	1.03545	1.09709		-5.80979	-16.6422	-2.38175	-12.2804	0.921546	-7.87123	-11.5652	-0.70893
856	13032	AA939414	cathepsin C	Ctsc	0.926339	0.992272	0.940436	0.948275	0.803231	0.709792	0.930551	1.17723		-7.97445	-16.5354	-10.4071	-11.7718	0.887046	0.999691	-8.70578	0.062201
857	21833	AA644914	thyroid hormone receptor alpha	Thra	0.949801	0.962585	0.93687	0.91839	0.930616	1.01295	1.06057	1.07484		-3.57028	-7.36086	-1.0872	0.489042	-0.359416	-15.2157	-2.09528	-0.33083
858	14204	AA967055	interleukin 4 induced 1	Il4i1	0.993962	1.01489	0.940593	0.960153	0.891139	0.975386	0.992955	1.1798		-16.489	-15.6545	-5.62639	-10.4071	0.366219	-13.9753	-16.4356	0.970929
859	16882	AA967089	ligase III, DNA, ATP-dependent	Lig3	0.935568	1.0007	1.0685	1.06793	0.933257	0.893931	1.03164	0.936973		-2.15109	-16.6611	-2.20763	-2.26492	-1.7758	0.825298	-10.9371	-2.38175
860	21833	AA644914	thyroid hormone receptor alpha	Thra	0.997879	0.969324	0.877944	0.992926	0.952308	1.03097	1.08315	1.00499		-31.0038	-14.5661	0.999154	-29.9374	-4.62619	-15.1249	0.607211	-30.5229
861	16430	AI195962	intergral membrane protein 1	Itm1	1.06926	0.821444	0.97446	0.874655	0.856727	1.00429	0.930241	1.03184		-22.2148	-1.17272	-29.5742	-7.84874	-4.83041	-31.0675	-20.8892	-28.832
862	13081	AI226268	cytochrome P450, family 24, subfamily a, polypeptide 1	Cyp24a1	1.02737	1.02659	0.913514	0.974815	0.992555	1.08067	1.06464	0.98148		-21.461	-21.8393	0.236521	-22.4015	-30.2542	-0.947937	-3.95327	-26.062
863	14667	AI227393	GM2 ganglioside activator protein	Gm2a	0.924232	0.899276	0.982307	0.840932	0.870346	0.857591	0.866949	0.709727		-9.60457	-3.42683	-29.2722	0.776955	-0.179514	0.39056	0.00150813	0.999994
864	17888	AA655446	myosin, heavy polypeptide 6, cardiac muscle, alpha	Myh6	0.975759	1.01266	1.07663	1.04761	0.97007	1.00011	1.04974	1.08321		-20.1206	-27.6946	0.0935146	-6.29128	-15.8791	-31.1085	-5.47566	0.477041
865		W62757			0.815279	0.993558	1.00444	0.971939	0.973425	1.02052	1.12499	1.13231		0.503293	-30.9761	-31.0496	-28.4747	-28.7154	-29.6693	-6.41337	-5.3647
866	14287	W59651	folylpolyglutamyl synthetase	Fpgs	0.920237	1.06402	1.38354	1.22557	1.11781	1.4973	1.53697	1.22498		-9.91579	-16.4505	0.999926	0.912596	-3.77272	1	1	0.910008
867	18472	W61996	platelet-activating factor acetylhydrolase, isoform 1b, beta1 subunit	Pafah1b1	0.961387	0.969837	0.898024	0.942433	0.972545	0.973561	1.00476	1.07666		-14.3813	-19.5409	0.783018	-5.2551	-21.2709	-21.8393	-30.7422	-1.6882
868	54369	AA000602	expressed in non-metastatic cells 6, protein	Nme6	0.972167	0.864858	1.01422	1.10792	1.03708	0.934829	0.856499	0.680684		-28.832	-3.86235	-30.5229	-11.3779	-27.4163	-20.1206	-2.79384	0.999458
869	54369	AA000602	expressed in non-metastatic cells 6, protein	Nme6	0.985881	0.850954	0.976787	1.11502	1.02168	0.946586	0.87841	0.698104		-30.5824	-2.94493	-29.6693	-11.2107	-29.9374	-24.039	-7.17534	0.996034
870	13202	W75660	D-dopachrome tautomerase	Ddt	1.12544	1.06063	1.00991	0.971947	1.01711	1.09215	1.00415	0.920643		-18.1845	-27.2738	-31.0038	-30.1795	-30.7422	-23.1394	-31.0823	-23.8614
871		W70994			1.05051	0.973038	1.0652	1.18313	1.13053	1.07411	1.26285	1.1728		-23.6825	-28.5963	-19.9276	-0.782647	-5.58801	-17.6042	0.840324	-1.36796
872	56464	AI325870	cathepsin F	Ctsf	0.978391	0.968217	0.936507	0.92718	0.895361	0.968927	1.01094	1.05496		-27.4163	-22.5873	-8.2694	-5.2551	-0.0986696	-22.9563	-30.0211	-12.9328
873	19047	W76723	protein phosphatase 1, catalytic subunit, gamma isoform	Ppp1cc	0.871858	0.928495	0.989711	1.00276	1.0217	1.06945	1.03298	1.21054		0.68245	-6.53686	-30.1795	-31.0496	-27.4163	-8.84942	-23.1394	0.992127
874	81489	W75670	DnaJ (Hsp40) homolog, subfamily B, member 1	Dnajb1	1.10878	1.28363	1.06386	0.827989	1.06318	0.950894	0.862245	1.16064		-15.5008	0.177906	-24.2155	-2.72003	-24.3906	-26.3764	-7.30724	-7.17534
875	12257	W82946	benzodiazepine receptor, peripheral	Bzrp	1.05012	0.965794	0.946488	0.914996	0.894836	0.870603	0.887035	1.0298		-14.938	-21.461	-12.2311	-2.43622	-0.0475236	0.811101	0.374951	-23.8614
876	69024	AI430334	sorting nexin 15	Snx15	1.08272	0.96176	1.04846	0.866781	1.00258	0.810841	0.944884	0.981506		-4.72763	-19.9276	-16.0691	0.826285	-31.0496	0.998727	-12.0583	-28.0952
877	15417	W97853	homeo box B9	Hoxb9	0.969413	1.03403	1.06753	0.984323	0.915928	0.947402	1.0347	1.03136		-24.7369	-23.8614	-11.2107	-29.2722	-4.72763	-15.5008	-23.5026	-24.7369
878	19899	AA000133	ribosomal protein L18	Rpl18	1.12596	0.948839	1.05118	1.25554	1.11536	0.967861	1.21544	1.2116		-10.2321	-25.0775	-25.5771	0.177906	-12.2311	-28.5963	-1.08031	-1.22021
879	56397	W83303	mortality factor 4 like 2	Morf4l2	1.05546	1.06732	1.25635	1.19748	1.05721	1.07028	1.0184	1.05732		-25.5771	-23.3215	-0.295402	-3.18044	-25.2456	-22.7723	-30.3947	-25.2456
880	12226	W83255	B-cell translocation gene 1, anti-proliferative	Btg1	0.866601	0.8043	0.666587	0.906371	0.571746	0.904055	1.01233	0.830038		-3.10074	0.646666	0.999936	-10.8797	1	-10.3921	-30.5824	-0.0986696
881	27407	W83271	ATP-binding cassette, sub-family F (GCN20), member 2	Abcf2	1.00396	1.0456	1.19305	1.0566	0.990286	0.912557	0.958213	1.05085		-30.9761	-17.4111	0.983592	-12.7559	-30.2542	-2.30099	-18.1845	-15.1249
882	22059	W87149	transformation related protein 53	Trp53	0.983777	1.02438	1.05293	1.1135	0.97044	0.916291	0.917706	1.13783		-29.1662	-26.9827	-16.0691	-1.31782	-24.9079	-4.42733	-4.83041	0.217412
883	67861	AI325329	RIKEN cDNA 2310005E10 gene	2310005E10Rik	0.921219	1.01535	0.954624	0.892238	0.963926	1.00333	0.977728	1.18263		-17.9909	-30.5229	-26.062	-10.7159	-27.8304	-31.0823	-29.8509	-2.79384
884	12444	W98440	cyclin D2	Ccnd2	0.940769	1.09947	1.0209	1.0396	1.00529	0.903506	0.89372	1.04355		-8.1278	-0.704605	-26.6835	-18.1845	-30.7892	-0.152003	0.420727	-16.2596
885	12444	W98440	cyclin D2	Ccnd2	0.966818	1.11645	1.06686	0.994301	0.993855	0.852914	0.890865	1.11422		-22.5873	-0.421114	-9.45091	-30.7422	-30.7892	0.928841	-0.0475236	-0.593052
886	20698	AA000819	sphingosine kinase 1	Sphk1	1.1187	0.969343	1.03259	1.10647	1.06736	0.915887	0.966362	1.05821		-3.26135	-26.3764	-26.062	-5.14688	-14.938	-8.1278	-25.4122	-17.9909
887	276756	W12289	similar to heat shock protein 86	na	1.1672	1.17998	1.15645	1.14217	1.02235	1.13246	0.825726	0.96495		-14.014	-12.405	-15.3126	-17.2183	-30.5824	-18.5721	-8.9978	-29.8509
888	19155	W10179	puromycin-sensitive aminopeptidase	Psa	1.14454	1.22372	1.04339	0.949	1.05548	0.953358	0.961075	0.991916		0.993084	0.999997	-11.2107	-6.41337	-5.81687	-8.41237	-12.7559	-29.9374
889	19155	W10179	puromycin-sensitive aminopeptidase	Psa	1.03477	1.09255	0.981382	0.944917	0.920143	0.854678	0.89215	1.00307		-17.7974	-0.0728278	-26.2201	-6.53686	-0.557295	0.997423	0.857397	-30.9761
890	59013	AA003085	heterogeneous nuclear ribonucleoprotein H1	Hnrph1	0.915029	0.976554	0.898695	0.919877	0.844654	0.963045	0.964072	1.07098		-0.666697	-24.7369	0.515964	-1.26858	0.997335	-17.4111	-17.9909	-4.23378
891	20090	W12819	ribosomal protein S29	Rps29	1.00423	0.962024	1.09668	1.09039	1.00358	1.13518	1.02724	1.15832		-31.0283	-24.9079	-8.5567	-10.0733	-31.0496	-2.43622	-27.964	-0.666697
892		W12121			1.01626	1.00041	1.05706	1.15631	1.0314	1.16387	1.21468	1.3505		-30.6921	-31.1085	-26.5309	-10.2321	-29.5742	-9.29855	-4.04547	0.515964
893		W12121			1.00185	1.02047	0.931963	0.996157	0.972618	0.887216	0.865939	1.003		-31.0675	-26.2201	-3.68436	-30.9109	-22.5873	0.826285	0.976845	-31.0038
894	14751	W29397	glucose phosphate isomerase 1	Gpi1	0.991341	1.1239	1.00583	1.06001	0.989617	1.05731	0.946161	1.02239		-30.1795	0.751096	-30.6921	-7.84874	-29.7615	-8.84942	-8.9978	-25.5771
895	15203	W11571	hephaestin	Heph	1.23642	1.14078	1.10141	0.979565	1.20528	1.11206	1.15508	1.17172		-0.991242	-9.60457	-16.6419	-30.2542	-2.64738	-14.5661	-7.57521	-5.58801
896	15203	W11571	hephaestin	Heph	1.15768	1.03455	1.13391	1.05287	1.24528	1.28794	1.09959	1.23135		-6.41337	-28.5963	-9.75954	-25.5771	-0.325884	0.503293	-16.0691	-0.782647
897	20090	W12819	ribosomal protein S29	Rps29	0.913924	1.01925	1.08701	1.13368	1.0756	1.15806	1.04044	1.24794		-16.0691	-30.1795	-17.6042	-8.5567	-20.1206	-5.14688	-27.4163	0.136628
898	74617	W10703	RIKEN cDNA 4833411K15 gene	4833411K15Rik	1.04522	1.32052	1.38157	1.3282	1.42157	1.34048	1.14367	1.18219		-13.1107	1	1	1	1	1	0.960934	0.998217
899	74617	W10703	RIKEN cDNA 4833411K15 gene	4833411K15Rik	1.05949	1.32184	1.38661	1.29423	1.44804	1.32305	1.10016	1.21433		-11.7159	0.999996	1	0.999974	1	0.999996	-1.80261	0.995476
900	74617	W10703	RIKEN cDNA 4833411K15 gene	4833411K15Rik	1.0582	1.31808	1.48555	1.38794	1.44596	1.4546	1.10123	1.17721		-11.7159	0.999997	1	1	1	1	-1.36796	0.966463
901	66082	W34507	abhydrolase domain containing 6	Abhd6	1.24922	2.51306	2.84856	2.60123	2.14575	2.37524	2.01575	1.73002		0.637159	1	1	1	1	1	1	1
902	22697	W12178	zinc finger proliferation 1	Zipro1	1.04776	1.15045	1.06403	1.11307	1.03679	1.14268	1.1411	1.05651		-10.0733	0.991869	-4.04547	0.816294	-15.8791	0.984102	0.981968	-6.41337
903	14751	W29397	glucose phosphate isomerase 1	Gpi1	1.02005	1.11884	1.01797	1.01814	0.989491	1.0645	0.985018	1.05318		-26.2201	0.751096	-27.1293	-26.9827	-29.6693	-5.47566	-28.0952	-9.45091
904	56040	W14267	ribosomal protein, large, P1	Rplp1	1.33077	1.09169	1.17678	1.10364	1.21916	1.44064	1.3088	1.2466		0.844763	-17.4111	-4.04547	-14.938	-1.17272	0.991043	0.729909	-0.179514
905	20016	W20956	RNA polymerase 1-1	Rpo1-1	0.950531	1.06089	1.08411	1.01333	0.979275	1.00465	0.973013	1.14348		-22.7723	-20.3133	-14.1972	-30.4603	-29.4763	-31.0283	-28.4747	-3.26135
906	22378	W41126	WW domain binding protein 2	Wbp2	1.03252	1.08075	0.996155	0.937238	0.920642	0.959331	0.940933	1.04929		-21.461	-3.18044	-30.9451	-6.53686	-2.17011	-16.6419	-7.98758	-13.2896
907	22378	W41126	WW domain binding protein 2	Wbp2	1.02466	1.07148	0.995341	0.948919	0.946967	0.975444	0.924138	1.07502		-22.5873	-1.92101	-30.7422	-6.91575	-6.05128	-22.2148	-0.487855	-1.36796
908	22378	W41126	WW domain binding protein 2	Wbp2	1.00472	1.08386	1.01109	0.945636	0.978647	0.956326	0.912995	1.04716		-30.7892	-0.991242	-29.3756	-7.04485	-25.0775	-12.2311	0.0252537	-11.5463
909	22697	W12178	zinc finger proliferation 1	Zipro1	0.889758	1.27854	0.953062	1.04254	1.02372	1.00326	1.01786	0.909528		0.0484975	0.999918	-16.0691	-18.9598	-26.5309	-31.0038	-28.4747	-1.98172
910	67279	W30130	RIKEN cDNA 3110004H13 gene	3110004H13Rik	0.928079	1.08973	1.04861	0.954711	0.949429	0.975975	1.03175	1.11309		-17.4111	-14.3813	-24.5644	-24.9079	-23.5026	-29.2722	-28.0952	-9.29855
911	15425	W33293	homeo box C6	Hoxc6	0.987687	1.05047	1.01008	0.934556	0.941325	1.03331	0.985358	1.14402		-30.7892	-26.5309	-30.9109	-22.9563	-24.3906	-28.946	-30.6388	-9.29855
912	20024	W11216	RNA polymerase II transcriptional coactivator	Rpo2tc1	0.998486	0.983261	0.985345	0.958051	1.04856	0.930977	0.94486	1.05019		-31.0823	-28.4747	-29.0574	-17.7974	-15.6897	-6.29128	-11.5463	-14.938
913	56040	W14267	ribosomal protein, large, P1	Rplp1	1.29771	0.874443	1.03244	1.26141	1.12484	1.21509	1.43676	1.27831		0.917564	-4.72763	-28.0952	0.420727	-7.44053	0.0252537	0.999094	0.849086
914	73025	W96827	RIKEN cDNA 2900070H08 gene	2900070H08Rik	0.96256	0.959885	0.926376	1.05533	1.02183	1.03818	0.961106	1.23002		-15.5008	-14.014	-1.47096	-7.71128	-24.9079	-15.8791	-14.7517	0.999987
915	67966	AA123204	RIKEN cDNA 2410141K03 gene	2410141K03Rik	0.923302	1.0095	1.0075	0.986627	0.949598	1.04267	0.936165	1.11498		-10.2321	-30.6388	-30.7892	-30.1018	-19.5409	-22.9563	-14.5661	-3.68436
916	12010	AA048817	beta-2 microglobulin	B2m	0.99875	1.00776	0.992384	0.987628	0.896352	0.87924	0.957842	1.03994		-31.0937	-30.6388	-30.6388	-29.9374	-1.03536	0.236521	-19.5409	-21.2709
917	230648	AA119086	RIKEN cDNA 4732418C07 gene	4732418C07Rik	0.949365	1.00331	1.02986	1.02484	1.05402	0.931186	0.874028	1.01228		-16.6419	-31.0283	-25.4122	-26.9827	-16.2596	-9.45091	0.27349	-30.0211
918	14287	W59651	folylpolyglutamyl synthetase	Fpgs	0.997676	0.998042	0.952282	0.966018	0.945448	1.02351	0.970968	0.95669		-30.9761	-31.0283	-5.3647	-13.1107	-6.06537	-38.5459	-30.5966	-14.117
919		AA690074			0.974174	1.07904	1.09274	0.925569	1.02345	1.07263	0.971136	1.21982		-49.6385	-18.8323	-12.7222	-17.9928	-50.8745	-22.0798	-48.0312	0.916088
920	66622	W70991	RIKEN cDNA 5730410I19 gene	5730410I19Rik	0.940412	1.04674	0.97594	1.04326	1.03427	1.03933	0.956272	1.19138		-11.4177	-23.3217	-43.8449	-26.5479	-35.0951	-30.2539	-24.2723	0.998203
921	18521	AA057997	poly(rC) binding protein 2	Pcbp2	1.03283	1.03539	0.951034	0.958387	1.13106	1.06552	1.00952	1.13391		-34.4008	-31.629	-16.9061	-23.9537	0.893339	-8.20391	-54.0939	0.916088
922	66679	AA543515	RAE1 RNA export 1 homolog (S. pombe)	Rae1	0.967251	1.13382	1.23298	1.14839	1.15662	0.959611	0.923223	1.10521		-36.827	0.737254	0.999847	0.905361	0.94849	-29.2305	-4.67767	-0.663396
923	11459	AA066878	actin, alpha 1, skeletal muscle	Acta1	0.879134	1.0123	1.02019	1.0281	1.1101	1.13908	0.897308	1.27762		-12.0587	-55.7606	-54.409	-52.6333	-20.5718	-11.8425	-19.1167	0.600526
924	67087	AA014587	catenin beta interacting protein 1	Catnbip1	1.06072	1.04011	0.912026	0.911683	0.975704	0.92235	0.876049	0.929297		-28.553	-41.5761	-10.5979	-10.3992	-50.1448	-15.6015	-1.32007	-19.4034
925		AW111317			1.01467	0.994951	0.980673	1.00031	0.876163	1.07644	1.24852	1.5148		-55.4576	-56.3628	-54.7033	-56.5063	-12.2774	-36.1353	-0.119463	0.999531
926	109182	W84173			0.895182	1.06945	0.93402	1.10775	0.831593	0.809656	1.15546	1.33231		-12.4985	-32.3201	-31.629	-15.6015	-0.237859	0.577958	-4.1246	0.988009
927		W98166	male enhanced antigen 1	Mea1	0.991878	1.04788	1.01463	1.03194	1.01831	1.07608	1.06923	1.174		-55.1048	-25.2382	-52.2204	-39.2276	-49.8936	-7.54795	-10.5979	0.981165
928	65116	W62792	proline-rich Gla (G-carboxyglutamic acid) polypeptide 2	Prrg2	0.986784	0.948772	0.90167	0.928135	0.90459	0.960816	0.986941	1.06194		-52.007	-15.3479	0.383795	-3.91614	0.198049	-26.5479	-52.007	-10.3992
929	67615	AI893737	ubiquitin-conjugating enzyme E2R 2	Ube2r2	1.01903	0.955406	0.85286	0.919257	0.888267	0.945475	0.919378	0.979502		-48.3079	-22.697	0.993567	-2.19272	0.751749	-14.3582	-2.19272	-46.8922
930	229007	AI430503	cDNA sequence BC021513	BC021513	0.927254	1.14721	1.11549	0.894028	1.00037	0.900374	0.928214	1.18301		-5.92902	0.905361	0.176907	0.314828	-56.5034	-0.119463	-6.34443	0.993567
931	11746	AA929367	annexin A4	Anxa4	0.986032	1.00024	0.891617	0.924184	0.942434	0.944153	0.883681	1.02064		-53.0276	-56.5034	-0.148064	-7.3897	-17.9928	-19.4034	0.35015	-49.3796
932	105156	AA000136	expressed sequence AI414999	AI414999	0.957481	1.06927	1.01973	0.924404	0.968558	0.986076	0.974481	1.0085		-40.5778	-25.8901	-52.8328	-19.4034	-47.1817	-54.5588	-50.392	-55.7606
933	11843	W98112	ADP-ribosylation factor 4	Arf4	1.04718	1.09793	1.16474	1.10964	1.06306	0.912357	0.979919	1.02946		-40.912	-15.0968	-1.16281	-10.7991	-31.9743	-15.8576	-53.0276	-49.6385
934	110058	W75713	brain and kidney protein	Bk	0.904755	1.03729	1.02814	1.14743	1.09509	0.864108	1.00659	1.13953		-26.2183	-50.8745	-53.2176	-19.1167	-30.2539	-11.0028	-56.3189	-15.3479
935	78903	AA142678	Werner helicasae interacting protein 1	Wrnip1	0.971088	0.875662	0.792377	0.819089	0.738713	0.719399	0.793942	0.737626		-49.6385	-3.71474	0.94849	0.729713	0.999029	0.999797	0.943509	0.999094
936	66052	W65755	succinate dehydrogenase complex, subunit C, integral membrane protein	Sdhc	1.02522	1.11362	0.962211	1.00388	1.04974	1.0457	1.07724	0.885285		-54.409	-27.8798	-51.567	-56.4594	-48.8509	-50.1448	-40.2421	-23.0084
937	320269	AA709662	RIKEN cDNA D030063F01 gene	D030063F01Rik	0.991128	0.879287	0.920477	0.967878	0.940444	0.90806	0.842886	0.935322		-55.1048	0.566236	-5.79477	-39.9051	-16.377	-2.33794	0.981759	-12.9484
938		AA003195		ESTs, Weakly sim	0.899727	1.00729	0.993081	0.882312	0.969226	0.906706	0.965533	1.07313		0.642337	-54.9764	-55.1048	0.939936	-34.4008	0.296515	-30.2539	-4.34027
939	67785	AI853513	RIKEN cDNA 6330503C17 gene	6330503C17Rik	0.965744	1.0649	0.953098	0.974941	0.973825	0.948882	1.01314	1.0802		-47.7513	-33.0127	-41.2449	-51.7892	-51.3404	-38.8872	-55.2279	-25.2382
940	28146	W65555	DNA segment, Chr 3, University of California at Los Angeles 1	D3Ucla1	1.10652	1.01634	1.13818	1.10209	0.881328	0.974139	0.800998	0.797328		-16.6403	-54.7033	-7.70848	-18.5502	-8.3737	-52.007	0.688876	0.744598
941	22059	AA272516	transformation related protein 53	Trp53	1.10541	1.295	1.40507	1.04608	1.07162	1.12515	0.910267	1.00796		-33.0127	-1.11251	0.758712	-50.6353	-43.8449	-26.8789	-35.0951	-56.3189
942	381323	AA139324	similar to 60S ribosomal protein L18a	na	1.29475	1.03699	1.13826	1.10614	1.29772	1.36444	1.30701	1.31199		-0.704142	-52.4291	-21.7742	-31.629	-0.623517	0.589386	-0.333918	-0.207249
943	380843	W36651	similar to dJ259A10.1 (ssDNA binding protein (SEB4D))	na	1.00856	1.04371	0.937511	0.933369	0.84696	0.897791	0.947258	1.14789		-56.0856	-49.6385	-37.5166	-35.4421	-3.52022	-17.9928	-42.2337	-8.72036
944	18597	W41118	pyruvate dehydrogenase E1 alpha 1	Pdha1	0.961738	1.16734	0.974222	1.03682	1.09327	1.05065	1.17303	1.238		-47.7513	-3.81457	-52.4291	-48.8509	-23.6368	-43.2065	-3.15122	0.383795
945		W85203		ESTs	1.06942	0.993449	1.08914	0.946168	1.01172	1.09655	0.83298	0.868969		-38.5459	-56.3189	-30.5966	-43.5268	-55.6652	-21.7742	-2.48876	-11.209
946	19730	W40905	ral guanine nucleotide dissociation stimulator	Ralgds	0.967302	0.982483	1.04994	0.86836	0.976688	0.960323	0.896516	1.04878		-40.912	-54.8425	-28.553	0.661681	-48.0312	-35.0951	-1.37466	-29.2305
947	68209	AW107630	RIKEN cDNA 1500026D16 gene	1500026D16Rik	0.977146	1.04685	1.1065	1.04587	1.04053	1.06499	0.92119	1.1008		-45.0948	-23.6368	-0.148064	-24.2723	-29.2305	-10.7991	-3.06302	-0.623517
948		W82759			0.96932	1.05808	1.058	0.857004	0.973352	1.00438	0.981731	1.05283		-46.8922	-30.5966	-30.9401	0.0871635	-49.1171	-56.3189	-53.4028	-34.0536
949	66039	W48339	DNA segment, Chr 14, ERATO Doi 449, expressed	D14Ertd449e	0.940571	0.815624	0.823268	0.635033	0.615199	0.714403	0.630125	0.638367		-29.2305	0.893339	0.824126	1	1	0.99997	1	1
950	14955	W78370	H19 fetal liver mRNA	H19	1.01529	1.14236	0.913012	0.897153	1.02313	0.935473	1.00721	1.22051		-56.0129	-29.5707	-41.5761	-36.827	-55.4576	-48.0312	-56.4008	-13.1771
951		AA638422			1.03668	1.03269	0.953942	0.91922	0.939636	1.10849	0.955922	1.02416		-46.5997	-48.3079	-40.5778	-19.6922	-31.629	-11.6289	-37.1721	-52.007
952		AI785658			1.01776	1.05943	1.03979	1.0649	1.0705	1.18828	1.17521	1.2629		-51.567	-21.4705	-36.4813	-17.9928	-14.8481	0.963392	0.918583	0.999702
953	12826	W33832	procollagen, type IV, alpha 1	Col4a1	0.908511	0.961314	1.04239	1.14424	1.00601	0.985006	1.14778	1.51194		-24.0785	-80.958	-78.6094	-5.66216	-103.451	-100.265	-4.83498	0.999999
954	68545	W48242	RIKEN cDNA 1110006O17 gene	1110006O17Rik	0.963676	1.01074	1.01831	1.01463	0.970666	0.999151	1.04369	1.12013		-63.0635	-99.6889	-92.0124	-96.2648	-74.987	-104.076	-53.0106	-0.391059
955	11864	AW488277	aryl hydrocarbon receptor nuclear translocator 2	Arnt2	0.975761	0.972272	0.94354	0.907325	0.869624	0.997494	0.88252	1.09448		-99.9815	-98.7553	-83.8021	-56.7456	-29.8086	-104.049	-37.8846	-61.1612
956	66542	AA521700			1.2943	1.17619	0.988826	1.11973	1.034	0.999122	1.12352	1.0843		0.0667127	-13.7668	-103.053	-38.4244	-95.4769	-104.092	-36.2889	-62.4291
957		AI528851			1.00938	0.950601	1.18591	1.00382	0.975895	1.00895	1.12423	1.15528		-103.451	-85.4526	-11.6634	-103.964	-99.3869	-103.451	-36.8168	-21.6944
958	98529	AA103412	RIKEN cDNA C230066K19 gene	C230066K19Rik	1.0665	1.07866	0.984305	0.944626	1.06709	0.908003	0.944353	1.10329		-13.2171	-5.80928	-91.5462	-20.5639	-12.6834	-0.427902	-20.1962	-0.25221
959	19737	W65084	regulator of G-protein signaling 5	Rgs5	0.984504	1.03509	0.977007	0.838638	0.969273	0.886434	0.868997	1.0423		-101.976	-93.8052	-99.3869	-7.08798	-95.4769	-29.3407	-18.7703	-89.6138
960	217410	AA004106	expressed sequence AW319517	AW319517	0.956719	0.974605	0.996828	0.943495	1.05052	1.05119	0.955172	1.12568		-64.3326	-98.7553	-103.835	-45.7727	-57.3733	-56.7456	-62.4291	-3.24012
961	244757	AA008684	cDNA sequence BC038479	BC038479	0.995321	0.930235	0.893904	1.00022	0.860956	0.965749	1.0888	1.02549		-103.755	-46.3612	-14.9155	-104.098	-2.95272	-85.9925	-33.711	-94.2348
962	52615	AA465867	DNA segment, Chr 11, ERATO Doi 530, expressed	D11Ertd530e	1.00147	1.02829	1.13301	0.985244	0.966367	0.965632	1.02054	0.957856		-104.049	-90.1068	-6.26722	-99.9815	-84.3572	-83.2422	-96.6464	-74.3735
963	14433	AI838143	glyceraldehyde-3-phosphate dehydrogenase	Gapd	0.950418	0.792411	0.852329	0.93214	0.840462	0.952871	0.950216	0.792455		-92.0124	-7.98467	-31.2392	-82.1088	-24.9099	-92.9234	-92.0124	-8.17353
964	12306	AI182836	annexin A2	Anxa2	0.915655	0.935405	0.968526	0.875723	0.845441	0.936321	0.939308	1.04464		-23.2655	-44.0258	-85.4526	-3.24012	0.269926	-44.605	-48.7438	-71.8973
965	17859	AA013767	Max interacting protein 1	Mxi1	1.03522	0.849437	0.918206	1.00571	0.895947	0.887927	0.921355	0.707245		-92.0124	-6.58671	-48.7438	-103.755	-29.8086	-24.0785	-51.7803	0.995973
966		AW113080			1.0131	0.952787	0.88048	0.981675	0.918126	0.947038	0.903339	0.817524		-101.536	-74.3735	-10.4742	-99.0757	-36.8168	-68.1321	-24.0785	0.431394
967	14972	AA017870	histocompatibility 2, K region	H2-K	0.964333	0.974265	0.970541	1.02459	1.03884	1.06537	1.13732	1.05429		-85.4526	-86.5271	-91.0731	-95.0707	-83.8021	-56.7456	-8.75981	-68.1321
968		AA473524			1.00068	1.02695	0.962892	1.01354	0.98867	1.07657	1.05156	0.958922		-104.076	-79.2021	-60.5279	-97.0195	-99.0757	-13.4899	-40.0668	-53.6288
969	67469	AW208577	RIKEN cDNA 1300003D03 gene	1300003D03Rik	1.00163	1.22445	1.22667	1.38592	1.31838	1.24836	1.32676	1.54041		-104.049	0.659403	0.696728	0.99973	0.994356	0.875962	0.996107	1
970	67023	AW556272	RIKEN cDNA 2010315L10 gene	2010315L10Rik	0.957596	0.87421	0.893235	0.903879	0.910593	0.959152	0.945329	0.942858		-45.7727	0.896758	0.346341	-0.668287	-1.89579	-48.7438	-26.1913	-22.8659
971		AA051402		ESTs	0.873595	0.887464	0.900643	0.974929	0.91635	0.843766	0.982565	0.966822		-10.9386	-18.0842	-27.0685	-95.8749	-40.6218	-2.68255	-100.265	-90.1068
972	269037	AA051395	hypothetical gene supported by BC025094	na	0.91117	0.935019	0.913431	0.748879	0.863961	0.836415	0.894067	0.978085		-6.42552	-24.4919	-7.43729	0.999999	0.76708	0.981976	-1.43785	-88.6088
973	72503	AI509955	RIKEN cDNA 2610507B11 gene	2610507B11Rik	0.937284	1.02874	1.00914	0.96257	0.957061	0.917716	1.03909	1.11428		-9.16745	-64.9669	-163.753	-74.0789	-56.1443	-2.20184	-73.1255	0.593251
974		AV040099		ESTs	0.99807	0.986821	1.09843	1.11572	1.03634	1.11103	1.13567	1.11798		-171.457	-148.988	0.669382	0.951735	-62.133	0.919576	0.99544	0.962732
975	18245	AI876540	ornithine decarboxylase antizyme	Oaz1	1.00539	0.912308	0.931377	0.982936	0.898658	0.9139	0.993284	0.902516		-168.866	-0.495435	-7.98124	-143.095	0.659401	-0.805212	-167.418	0.470843
976	102754	AA138615	expressed sequence AW107703	AW107703	0.987211	0.863083	0.909025	0.860342	0.882253	0.84736	0.910097	0.829484		-160.969	0.902831	-4.64473	0.926868	0.37076	0.981884	-5.20774	0.997541
977		AA039148		ESTs	1.1273	0.78311	0.689282	0.503017	0.722214	0.544289	0.584833	0.434625		-83.8802	-9.04297	0.638576	0.999992	-0.341255	0.999857	0.99826	1
978	12406	AI838326	serine (or cysteine) proteinase inhibitor, clade H, member 1	Serpinh1	0.944551	1.0694	1.05864	1.10778	0.935366	0.976551	1.08946	1.07302		-103.423	-84.884	-103.423	-33.8951	-84.884	-157.16	-54.4952	-78.9222
979	209361	AA176054	TAF3 RNA polymerase II, TATA box binding protein (TBP)-associated factor	Taf3	0.939331	1.02257	0.977406	0.920988	0.821215	0.935806	0.976871	0.938144		-92.0056	-158.484	-157.829	-58.6702	0.37076	-84.884	-157.16	-88.9348
980	11848	AA619989	ras homolog gene family, member A	Arha	0.951122	0.991578	0.955821	0.942784	0.81827	0.899904	0.970389	0.980026		-45.2088	-165.711	-69.3665	-27.7209	0.999972	0.186779	-105.512	-137.687
981	66902	AI322646	methylthioadenosine phosphorylase	Mtap	0.984898	1.00469	1.10493	1.12261	1.02466	1.02078	1.0596	1.044		-162.126	-171.141	-14.7403	-6.31234	-148.176	-154.357	-74.0789	-107.601
982		AI786105			1.01144	0.97158	0.898589	0.984	0.929689	0.925643	0.941712	1.03823		-291.175	-190.302	0.357215	-269.26	-13.6881	-9.34115	-36.4527	-134.798
983		AA048374			1.04492	1.22628	1.24763	1.09502	0.933016	1.05772	0.984865	0.975766		-247.927	-1.73964	-0.292613	-113.055	-173.161	-213.199	-306.804	-292.351
984		AI747776			0.97215	0.98454	0.998692	1.10742	0.968311	0.982188	1.0244	1.10371		-289.974	-307.542	-315.91	-103.688	-282.273	-305.24	-296.8	-111.463
985	54124	W80209	CDC28 protein kinase 1	Cks1	1.00197	0.937304	0.936519	0.904831	0.937128	0.815354	0.954494	0.932467		-315.716	-160.038	-158.185	-64.0369	-160.038	0.209711	-222.605	-143.625
986	321022	AI845410	carnitine deficiency-associated gene expressed in ventricle 3	Cdv3	0.967378	1.0193	0.978028	0.813169	0.833644	0.86205	0.957163	0.989705		-220.735	-279.525	-269.26	0.995649	0.963349	0.25345	-235.648	-424.333
987	12313	W89749	calmodulin 1	Calm1	1.01782	0.947936	1.0175	0.99527	0.91163	1.02761	1.06249	1.07416		-396.128	-173.349	-397.928	-436.022	-22.372	-344.732	-132.03	-84.7644
988	15939	AI608314	immediate early response 5	Ier5	0.998406	0.894022	0.867409	0.904671	0.880636	0.912501	1.02379	0.93081		-438.682	-2.14348	0.767831	-6.94248	0.107243	-13.7097	-344.732	-63.1314
989	67023	W20833	RIKEN cDNA 2010315L10 gene	2010315L10Rik	1.0095	0.85553	0.885565	0.910919	0.922083	0.897012	1.00461	0.958363		-521.97	0.879237	-1.41058	-18.4736	-40.7694	-5.46689	-537.108	-262.131
990		AA016454			0.9302	0.991151	0.939714	0.884083	0.906455	0.968732	0.970509	0.999615		-219.739	-534.726	-277.932	-41.6635	-104.737	-453.756	-461.774	-541.737
991	30926	W36243	thioredoxin-like 2	Txnl2	1.03963	0.970334	0.973516	1.07844	1.07256	1.02076	1.08351	1.09693		-542.467	-625.871	-653.794	-203.228	-244.53	-699.815	-172.5	-106.112
992	14793	AW061348	cell division cycle associated 3	Cdca3	1.16041	1.02117	0.994398	1.05397	1.00908	1.03238	1.2029	1.07542		-64.0439	-736.407	-772.696	-560.707	-768.173	-689.956	-17.9356	-421.234
993	19193	AA388435	pipecolic acid oxidase	Pipox	1.01109	0.814476	0.772293	0.776775	0.730307	0.724604	0.792979	0.751077		-943.903	-0.0730453	0.959014	0.940636	0.998977	0.9994	0.777901	0.993372
994	14870	AA710940	glutathione S-transferase, pi 2	Gstp2	1.55998	1.61432	1.83198	1.93014	1.7645	2.51065	1.7493	1.8112		0.185125	0.696465	0.994252	0.998948	0.980573	1	0.974419	0.991553
995		AI662549			1.02595	0.945436	0.931723	1.06679	1.00052	0.996831	1.11796	0.978935		-1886.4	-1066.14	-694.668	-836.109	-3046.68	-3039.23	-192.203	-2735.67
996	11951	AA000254	ATP synthase, H+ transporting, mitochondrial F0 complex, subunit c (subunit 9), isoform 1	Atp5g1	0.949171	0.950872	0.959426	1.03427	0.998869	1.04425	1.10678	0.965994		-2040.38	-2094.93	-2358.92	-2582.82	-3046.21	-2307.67	-691.11	-2552.63
997	16011	AW414054	insulin-like growth factor binding protein 5	Igfbp5	1.00531	1.12783	1.1118	0.986261	0.928199	1.01159	0.99705	0.985202		-3944.85	-495.344	-770.88	-5495.5	-2486.52	-5545.01	-5652.05	-5467.57
998	11739	AI272544	solute carrier family 25 (mitochondrial carrier; adenine nucleotide translocator), member 4	Slc25a4	1.07714	1.00304	0.818087	0.999992	1.17467	1.04738	1.20677	1.21704		-14666.5	-19800.8	-681.014	-5659.26	-1417.19	-5033.11	-888.445	-750.214
999	20425	AA110410	serine hydroxymethyl transferase 1 (soluble)	Shmt1	1.05325	1.00694	0.876997	0.936058	0.875671	0.868274	0.880626	0.87627		-1387.54	-7674.91	0.404972	-501.327	-1.51692	0.119762	-3.89388	-1.69128
1000		AA238899			1.05828	0.99594	0.937382	0.957021	0.944741	0.994365	1.0516	0.97788		-3585.94	-5645.14	-3142.82	-4286.54	-3585.94	-5635.93	-3958.55	-5257.95
1001		AA396041			0.922675	0.880227	0.845778	0.879809	0.90905	0.866808	0.942256	1.16458		-486.086	-40.5734	-1.86681	-39.5079	-77.6005	-4.01019	-336.795	-1.67519
1002	216501	AA028511			0.906199	1.0298	0.794326	1.08524	0.682679	0.918825	0.998493	0.944628		-542.472	-859.133	-62.6232	-634.242	-0.0627777	-618.252	-899.312	-757.966
1003	55951	AI876247	brain protein 44-like	Brp44l	1.06509	1.01143	0.962691	0.921987	0.850556	0.882402	0.918786	0.884916		-537.039	-884.743	-744.368	-384.79	-35.3301	-125.525	-355.623	-135.367
1004	106931	AA050271	RIKEN cDNA 4933402K10 gene	4933402K10Rik	1.34818	1.18729	1.17646	1.02452	1.13551	0.962198	1.09146	1.18952		0.331968	-49.4407	-67.2014	-536.253	-145.445	-497.427	-293.215	-46.3891
1005	68262	AA033390	1-acylglycerol-3-phosphate O-acyltransferase 1 (lysophosphatidic acid acyltransferase, delta)	Agpat4	1.01716	1.04077	0.934299	0.945075	0.919683	0.99592	1.05998	0.982589		-536.253	-421.316	-244.615	-316.769	-159.91	-563.182	-303.261	-534.479
1006	108679	AA435079	COP9 (constitutive photomorphogenic) homolog, subunit 8 (Arabidopsis thaliana)	Cops8	1.02628	1.04344	1.10273	1.14018	1.02592	0.910308	1.04574	0.992725		-192.76	-133.811	-12.332	-0.622765	-194.028	-15.2493	-126.656	-235.198
1007	14077	AI327465	fatty acid binding protein 3, muscle and heart	Fabp3	0.936969	1.05742	0.979495	0.884374	0.801909	0.967146	0.914295	1.02191		-171.217	-187.581	-231	-74.8911	-5.77941	-219.435	-128.081	-230.375
1008	14359	AW322547	fragile X mental retardation gene 1, autosomal homolog	Fxr1h	1.00638	1.03411	0.971805	0.977979	0.962694	0.982962	1.02686	1.03529		-235.62	-155.513	-174.015	-197.765	-138.137	-213.601	-182.25	-143.926
1009	50868	AA175476	kelch-like ECH-associated protein 1	Keap1	1.08333	0.900177	0.987875	0.924011	0.802222	1.00149	0.922759	0.969387		-162.705	-122.406	-237.072	-164.134	-13.8921	-239.083	-161.272	-225.4
1010	16571	AI323080	kinesin family member 4	Kif4	0.932184	0.943868	0.977599	0.975142	0.890399	0.90848	1.06655	1.33445		-76.0207	-109.922	-211.519	-206.039	-10.9141	-28.5033	-90.321	0.999888
1011	66163	AI325513	mitochondrial ribosomal protein L4	Mrpl4	0.97746	0.801159	1.01337	1.02888	0.883552	0.975308	0.970201	0.902711		-208.277	0.993451	-228.369	-192.76	-4.57012	-202.573	-187.581	-16.3345
1012		AI845093			1.14802	0.863965	1.05568	1.03532	0.8198	0.79164	0.932024	0.956286		-39.2092	-34.2029	-98.685	-109.309	-12.172	-5.00246	-87.9195	-104.19
1013	66480	W33336	ribosomal protein L15	Rpl15	1.02182	0.947735	1.00027	1.15012	1.0633	1.13746	1.18893	1.1545		-100.412	-45.2155	-117.268	0.638278	-33.6712	0.200728	0.973684	0.155482
1014	56409	AA068786	nudix (nucleotide diphosphate linked moiety X)-type motif 3	Nudt3	0.994267	0.969675	0.914058	0.925642	0.863958	0.926877	1.00362	0.937694		-114.887	-66.1086	-0.372439	-3.04704	0.996663	-3.5539	-116.409	-9.75976
1015	67828	AI594901	RIKEN cDNA 1110055J05 gene	1110055J05Rik	0.9743	0.914304	1.01974	0.913097	0.876141	0.888874	1.04096	0.998693		-103.149	-26.3078	-109.309	-25.4134	-4.48064	-8.9022	-86.567	-117.22
1016	20104	AW556869	ribosomal protein S6	Rps6	1.08267	0.9739	1.08664	1.20684	1.16547	1.12858	1.23146	1.16488		-76.0885	-111.622	-73.2374	-10.9164	-24.1105	-43.3672	-6.17539	-24.5397
1017	12455	AW146398	cyclin T1	Ccnt1	0.916622	0.978582	1.03446	0.883231	0.948002	0.969454	0.955106	1.10932		-31.5951	-108.02	-95.6779	-8.102	-71.0954	-99.2675	-81.0367	-18.2791
1018	227094	AA138012	RIKEN cDNA 5330401P04 gene	5330401P04Rik	0.991807	0.999805	0.977829	0.941877	0.808965	0.987103	0.890511	1.02594		-116.889	-117.274	-114.128	-96.2914	-10.4422	-116.259	-56.339	-113.269
1019		AW046042			0.929507	0.934276	0.983883	1.02519	0.863683	1.01903	0.973377	1.11349		-37.4968	-43.979	-110.891	-102.617	-0.737395	-108.459	-100.412	-10.2109
1020		AA108842			1.00453	0.927064	0.980487	0.948353	0.89655	1.05525	1.16919	1.16428		-117.123	-83.8233	-114.645	-99.2675	-58.3975	-98.685	-28.1583	-30.5875
1021	69274	AA178118	CTD (carboxy-terminal domain, RNA polymerase II, polypeptide A) small phosphatase-like	Ctdspl	0.75863	1.07733	0.881798	0.873478	0.764055	0.964049	1.05597	1.25181		0.860411	-66.8188	-24.1105	-18.6331	0.811109	-102.077	-86.567	-0.108526
1022	235459	AA098360	general transcription factor II A, 2	Gtf2a2	1.0185	0.959492	0.771501	0.823162	0.819736	0.949291	0.968916	1.1455		-109.309	-81.7368	0.998319	0.876465	0.906379	-66.8188	-95.0588	-2.33911
1023		AI316008			1.00007	1.00355	0.894101	1.0047	0.998767	1.20901	1.019	1.03824		-117.274	-116.979	-13.8162	-116.787	-117.25	0.544473	-110.12	-91.8832
1024		AA517885			0.999942	0.983048	0.963636	1.05998	0.990958	1.09336	1.02407	1.01545		-117.274	-110.51	-89.2573	-59.7821	-115.336	-24.5397	-104.699	-111.973
1025	20345	AI530577	selectin, platelet (p-selectin) ligand	Selpl	0.882981	0.875919	0.805843	0.725915	0.718924	0.727358	0.780534	0.866257		0.151238	0.501756	0.999135	1	1	1	0.999942	0.758788
1026	54214	AI607869	golgi autoantigen, golgin subfamily a, 4	Golga4	1.02267	0.902457	0.960345	0.899931	0.913171	0.899277	0.918771	0.90518		-55.1011	-16.8416	-47.7854	-15.5126	-15.7732	-19.3952	-25.0749	-17.9513
1027	16997	AW230323	latent transforming growth factor beta binding protein 2	Ltbp2	0.914818	1.15445	0.98573	1.05209	0.939587	0.893382	1.02257	1.08415		-15.7732	-1.45549	-57.8018	-38.6692	-30.9951	-6.92421	-55.1011	-19.99
1028	67248	AA098569	ribosomal protein L39	Rpl39	1.0586	0.971941	1.02501	1.0326	1.04413	1.10124	1.23218	1.18223		-16.8416	-43.3585	-47.129	-39.7649	-28.858	-1.08258	0.999864	0.992963
1029	319604	AA968029	RIKEN cDNA B930006L02 gene	B930006L02Rik	0.954951	0.977206	0.941923	0.871293	0.889513	0.991181	0.92182	0.971504		-32.441	-51.4753	-21.5184	0.540916	-0.63656	-58.51	-8.92086	-47.129
1030	230765	AW061243	similar to histone deacetylase	na	0.999949	1.06469	1.1363	1.21585	1.14563	0.947969	0.981174	1.16498		-59.863	-29.9212	-3.11849	0.834323	-1.95192	-36.0998	-56.1813	-0.411781
1031	212880	AA198943	DEAD (Asp-Glu-Ala-Asp) box polypeptide 46	Ddx46	1.01038	0.998944	0.976169	0.964555	0.944806	0.986075	0.992987	1.0596		-58.7531	-59.8506	-53.6494	-47.129	-33.5336	-57.8018	-59.3408	-32.441
1032	67869	AW209010	polyadenylate-binding protein-interacting protein 2	Paip2	0.989545	1.08894	0.959277	0.987821	0.95104	0.986887	1.04541	0.949634		-55.5479	0.235596	-19.1014	-54.1513	-11.2749	-53.3919	-16.0364	-16.3022
1033	14231	AI182368	FK506 binding protein 7	Fkbp7	1.04354	0.868114	0.885095	0.926232	0.949656	0.959859	0.756409	0.828104		-49.9941	-8.04691	-13.5232	-33.1688	-45.7869	-50.597	0.925949	-1.28906
1034		AA469690			0.999723	1.06829	1.03452	0.894774	0.812401	0.747956	0.963909	0.835944		-59.863	-47.129	-56.1813	-30.2781	-5.3843	0.105949	-55.5479	-10.2492
1035		AA178547		ESTs, Highly sim	1.00509	0.890128	0.805805	0.906352	0.855588	1.02238	0.949701	0.921008		-59.7514	-30.9951	-6.19139	-37.5693	-18.5214	-59.4178	-51.4753	-44.7574
1036	105808	AA209976			0.895716	0.949651	0.973039	0.987099	0.750509	0.976869	0.754948	0.7106		-22.4629	-48.1097	-56.3824	-59.0738	0.834323	-57.3098	0.791033	0.979418
1037	20185	AW319455	nuclear receptor co-repressor 1	Ncor1	0.986016	0.884311	0.852332	0.965822	0.825194	0.88268	1.06757	1.05691		-57.6433	-3.0301	0.274834	-47.4585	0.872863	-2.77449	-26.4273	-33.1688
1038		AI386138			1.01644	0.932908	0.965794	1.0546	1.03863	1.1729	1.23576	1.09764		-54.1513	-9.47496	-37.5693	-20.291	-34.6314	0.983022	0.999864	-1.75641
1039	20249	AA124027	stearoyl-Coenzyme A desaturase 1	Scd1	0.999382	1.27067	1.34907	1.27793	1.13941	0.982181	1.07444	0.956045		-59.8599	-2.77449	0.105949	-2.30441	-24.7414	-58.8659	-45.7869	-53.9025
1040		AI530358			1.00068	0.998945	1.00023	0.999355	0.880607	0.845548	0.999279	1.01398		-59.8599	-59.8599	-59.863	-59.8599	-20.5943	-9.28775	-59.8599	-59.0738
1041	13645	AI326499	epidermal growth factor	Egf	0.945601	0.874051	0.89846	0.932764	0.953891	0.896525	1.0248	1.01871		-35.3651	-2.61184	-8.74116	-26.7698	-41.2155	-8.04691	-54.1513	-56.5784
1042	56727	AA139428	aldehyde reductase (aldose reductase)-like 6	Aldrl6	0.943899	0.898773	0.939509	0.913772	0.912915	1.04963	0.917024	1.07881		-32.0782	-6.92421	-28.858	-13.0524	-12.5922	-38.3029	-14.4967	-20.291
1043	66427	AA276490	RIKEN cDNA 1810044O22 gene	1810044O22Rik	0.920644	1.02645	0.995173	1.03966	0.900509	0.91427	0.977707	0.8572		-23.7526	-54.6354	-59.6647	-48.7498	-13.5232	-20.291	-55.764	-2.0197
1044	67890	AI528546	RIKEN cDNA 1810045K17 gene	1810045K17Rik	1.03302	1.07057	1.0631	0.983017	0.999262	0.985706	1.06461	1.06997		-51.7608	-36.4672	-35.7324	-57.4793	-59.8599	-58.1021	-39.7649	-32.0782
1045	13361	AI152401	dihydrofolate reductase	Dhfr	0.950236	0.906476	0.877274	0.807046	0.825955	0.928344	0.856625	0.981121		-40.8542	-14.7467	-4.76904	0.829416	0.48803	-26.7698	-1.39888	-56.7692
1046	30946	AA009183	activator of basal transcription	Abt1	0.957166	1.03404	1.10965	0.978337	0.978755	0.962855	0.981315	1.09591		-27.4597	-37.9362	-0.0980383	-49.3782	-49.6877	-33.5336	-51.7608	-1.57224
1047	18584	AI551852	phosphodiesterase 8A	Pde8a	0.989215	1.10736	1.04813	0.882061	0.88518	0.908258	0.97835	0.938795		-57.4793	-1.3434	-28.5063	0.48803	0.347826	-2.30441	-50.8933	-15.7732
1048	14433	AW549806	glyceraldehyde-3-phosphate dehydrogenase	Gapd	0.994589	0.97365	0.990364	0.97703	0.900924	0.959591	0.927953	0.893539		-59.6121	-53.9025	-59.0738	-55.1011	-11.7035	-46.4626	-26.0865	-8.92086
1049		AA218406			0.945357	0.971074	0.928134	0.900148	0.885799	0.96812	1.00907	0.98204		-10.3194	-23.6512	-4.04214	0.104705	0.696234	-22.0944	-31.3323	-28.6124
1050	14319	AW322317	ferritin heavy chain	Fth	1.13615	1.01451	1.28481	1.25597	1.0674	1.07712	1.1889	1.18645		-8.76039	-31.7502	0.613641	0.208292	-23.0732	-20.7014	-2.6351	-2.78224
1051	14268	AA145458	fibronectin 1	Fn1	0.998319	0.994534	0.997794	0.925102	0.909419	0.918098	0.95798	0.975437		-32.2804	-32.1263	-32.2685	-11.4899	-6.81554	-9.2136	-23.6512	-29.0349
1052	20678	AI528773	SRY-box containing gene 5	Sox5	1.01641	1.01231	0.861679	0.991489	0.966794	1.04913	1.13005	1.02261		-28.1694	-29.8141	0.996947	-31.0814	-17.8919	-9.67934	0.955627	-24.9648
1053	234199	AW111160	fibrinogen-like protein 1	Fgl1	0.882131	0.927717	1.00199	0.670939	0.890272	0.570434	0.671284	1.1028		-13.8179	-23.8421	-32.2889	0.974449	-15.7211	0.999894	0.974449	-19.2958
1054	51960	AI464681	DNA segment, Chr 1, ERATO Doi 8, expressed	D1Ertd8e	0.992732	1.01438	0.950079	0.910176	0.942042	0.971707	0.906448	1.04209		-31.8639	-30.7046	-16.7002	-3.17096	-13.082	-26.2161	-2.49259	-21.1013
1055		AA272208			0.999672	1.00304	0.981957	0.999686	1.00151	1.00724	0.999612	0.986259		-32.294	-32.1263	-26.7292	-32.294	-32.2532	-31.3323	-32.294	-28.8964
1056	51788	AA239740	H2A histone family, member Z	H2afz	0.991272	1.01511	0.996128	0.898441	0.889161	0.761129	0.953266	1.0054		-31.8087	-30.8989	-32.2126	-3.33501	-1.9671	0.999438	-20.9015	-32.1263
1057	69870	AI131619	RIKEN cDNA 2010003I19 gene	2010003I19Rik	0.90539	0.91109	0.934607	1.14528	1.05156	1.11154	0.999559	1.03583		-9.2136	-10.8134	-18.0918	-2.85758	-23.4594	-7.75261	-32.294	-27.5489
1058		AW061031			0.961402	0.907564	1.04916	0.868828	0.740612	0.941797	0.901483	1.16179		-29.3047	-15.5273	-28.3193	-9.36746	0.613641	-26.0417	-16.5032	-8.91005
1059	67684	AI447315	RIKEN cDNA 3300001P08 gene	3300001P08Rik	0.975371	1.02682	0.849935	0.833784	1.07723	0.871176	0.975485	1.01162		-29.935	-29.6906	-0.767633	0.104705	-16.5032	-2.85758	-29.935	-31.7502
1060	319624	AA266610			0.986057	0.931155	0.987427	0.861632	0.858131	0.838321	0.982333	1.06405		-32.01	-25.1478	-32.01	-8.76039	-10.4827	-7.07602	-31.6885	-29.0349
1061		AA276433			1.0017	0.973948	1.05694	1.046	1.03465	1.15519	1.05887	1.14745		-32.2685	-25.5097	-11.4899	-16.3068	-21.8967	0.916986	-10.8134	0.864221
1062	71994	W91223	calponin 3, acidic	Cnn3	0.981275	1.07758	1.00057	0.968452	0.979778	1.01674	0.977478	1.06802		-31.2517	-18.8939	-32.294	-29.3047	-30.9916	-31.4842	-30.7046	-21.3008
1063	56358	AA222096	coatomer protein complex, subunit zeta 2	Copz2	0.954649	0.946423	0.900112	0.898187	1.00789	0.941469	1.16054	1.16514		-18.8939	-15.1417	-1.61717	-1.40352	-31.8087	-13.082	0.734753	0.792916
1064		AA498478			0.964709	1.07433	1.04054	1.03852	1.07409	1.11813	1.13677	1.15967		-22.4879	-7.47763	-20.7014	-21.6985	-7.6144	-0.374909	0.471475	0.847872
1065	68545	AA267694	RIKEN cDNA 1110006O17 gene	1110006O17Rik	0.933798	1.02302	1.00423	0.95378	1.03984	1.07553	0.98096	1.17449		-11.3189	-28.7556	-32.1584	-19.6978	-23.0732	-9.83733	-29.6906	0.787096
1066		AA530536			0.991266	0.959909	1.03835	0.975695	1.00998	1.11987	1.10247	1.05545		-31.6885	-21.4999	-22.8788	-27.8632	-31.5555	-0.8902	-2.85758	-15.9157
1067	99237	AA184663	expressed sequence AU045326	AU045326	1.02508	1.0338	1.05575	1.08238	1.07331	1.14233	1.15058	1.30547		-25.5097	-21.1013	-10.3194	-2.49259	-4.4273	0.909365	0.949929	1
1068	106916	AA269823			0.984375	1.08488	1.09783	0.891145	1.06407	1.04312	0.952801	1.19523		-31.8087	-17.2942	-14.1917	-9.99667	-20.501	-26.2161	-24.5952	-0.139293
1069	18619	AI836387	preproenkephalin 1	Penk1	1.07052	1.08762	0.9565	0.76189	1.05168	0.666445	1.00185	0.955793		-26.5598	-27.5489	-28.6124	-3.76725	-30.6031	-1.90624	-32.1263	-31.3323
1070		AA434866			0.994104	1.18031	1.10848	0.959982	0.879533	0.915388	1.0233	1.05102		-32.1584	-0.807708	-9.36746	-26.5598	-4.62801	-13.082	-30.3916	-24.2208
1071	107350	AA260226	expressed sequence AW112010	AW112010	0.948618	1.06498	0.882471	1.08387	0.825977	0.806947	0.931208	1.24886		-25.6885	-23.2667	-8.76039	-18.8939	-1.06487	-0.0605639	-21.3008	0.168218
1072	20848	W62227	signal transducer and activator of transcription 3	Stat3	0.803859	0.817933	0.823657	0.883436	0.883879	0.733656	0.929003	1.09942		-1.2047	-2.28732	-2.78224	-12.363	-12.5411	0.814749	-23.0732	-18.4925
1073	19737	AA198048	regulator of G-protein signaling 5	Rgs5	1.03557	0.974377	0.798385	0.820136	0.877736	0.787853	0.884484	0.845448		-29.6906	-30.8032	-0.28198	-2.42305	-9.67934	0.104705	-11.1491	-4.23203
1074	83435	AA467382	pleckstrin homology domain-containing, family A (phosphoinositide binding specific) member 3	Plekha3	1.02977	0.993504	1.12852	0.921502	0.91717	0.971655	1.0222	0.982707		-26.2161	-31.9646	-0.28198	-6.06892	-4.93941	-26.3888	-28.7556	-29.935
1075		AW413231			0.987394	1.06683	1.0608	1.0199	1.03843	1.00948	1.14903	1.07721		-31.4098	-16.1109	-18.0918	-30.2815	-25.5097	-31.8087	-0.767633	-12.9007
1076	227197	AI595947	NADH dehydrogenase (ubiquinone) Fe-S protein 1	Ndufs1	1.06765	1.1071	0.945725	0.975223	1.08442	1.10894	0.990801	1.15379		-9.06112	-1.06487	-12.9007	-26.8968	-4.4273	-0.8902	-31.4842	0.824842
1077	105559	AA472152	muscleblind-like 2	Mbnl2	1.0164	0.932138	0.962758	0.907372	0.856632	0.956815	0.895585	0.983024		-30.7046	-12.5411	-24.4086	-5.04599	0.246628	-24.4086	-2.78224	-30.4988
1078	56386	AA444448	UDP-Gal:betaGlcNAc beta 1,4-galactosyltransferase, polypeptide 6	B4galt6	0.952527	0.931591	0.98568	1.03832	0.849116	0.930363	0.819867	0.796171		-20.3004	-12.0102	-30.9916	-24.4086	0.679429	-11.6622	0.954264	0.992096
1079		AA404201			0.968976	1.04529	1.05765	1.01746	1.11424	1.1315	1.08485	1.19454		-25.1478	-19.4968	-14.38	-29.935	-1.15723	0.0133159	-5.7151	0.964142
1080		AA683961			1.32131	1.1145	0.96979	0.8921	1.13938	1.04775	1.02394	1.13638		0.923999	-10.9806	-29.6906	-9.83733	-6.68748	-26.5598	-30.7046	-7.20844
1081	231086	AW107943	hydroxyacyl-Coenzyme A dehydrogenase/3-ketoacyl-Coenzyme A thiolase/enoyl-Coenzyme A hydratase (trifunctional protein), beta subunit	Hadhb	1.0523	1.0839	0.991076	0.970386	0.948056	1.06828	0.980976	1.0983		-18.6931	-8.17592	-31.7502	-26.7292	-17.6923	-12.9007	-29.935	-4.83422
1082		AA444288			1.00487	1.04552	1.0436	1.00916	1.01784	1.11496	1.11806	1.09992		-32.1263	-20.501	-21.3008	-31.6885	-30.0532	-1.72979	-1.40352	-3.85756
1083	16211	AA451240	karyopherin (importin) beta 1	Kpnb1	1.04593	0.987695	0.894683	0.922169	0.926064	0.888399	0.875749	0.805857		-27.0626	-31.8639	-10.6474	-18.0918	-19.0948	-9.2136	-6.68748	0.188476
1084	30045	AA473149	J domain protein 1	Jdp1	1.00258	0.940129	1.11953	1.00913	1.08957	0.88959	0.763816	0.895138		-32.2685	-20.501	-6.81554	-31.9646	-13.2645	-6.06892	0.978132	-7.20844
1085	50493	AA473156	thioredoxin reductase 1	Txnrd1	0.984901	1.37942	1.44696	1.4577	1.31231	1.25624	1.29864	1.33611		-30.6031	0.999998	1	1	0.999902	0.997661	0.999787	0.999973
1086	24128	AA472293	5'-3' exoribonuclease 2	Xrn2	1.01553	1.0452	0.995149	0.780872	0.983022	0.967883	0.893327	0.973436		-32.0521	-26.2161	-31.6885	0.592688	-32.1584	-27.7071	-8.3199	-31.4842
1087		AA275912			0.99688	1.0333	1.08512	1.04465	1.21509	1.33498	1.20439	1.2031		-32.2346	-26.3888	-9.2136	-22.6837	0.923999	0.999764	0.875385	0.868043
1088	66641	AI839862	RIKEN cDNA 5730470L24 gene	5730470L24Rik	1.0151	0.982359	1.03277	0.924118	0.963844	0.886061	0.905426	1.00812		-30.0532	-29.171	-23.0732	-3.94919	-20.7014	0.523436	-0.767633	-31.6236
1089	78738	AI604259			1.02828	1.04269	0.945276	0.875997	0.925798	1.07996	0.747165	0.883166		-28.7556	-24.9648	-20.3004	-2.09197	-13.448	-13.6324	0.998328	-3.09079
1090	60527	AA444721	fatty acid desaturase 3	Fads3	0.96825	0.989335	0.866574	0.893534	0.972244	0.971709	0.818911	0.960928		-25.8659	-31.4842	-0.0862556	-2.85758	-27.2266	-27.0626	0.976724	-22.8788
1091	67268	AA498585	RIKEN cDNA 2900073G15 gene	2900073G15Rik	1.03451	1.0175	1.02602	1.08543	1.15393	1.08486	1.08151	1.30377		-23.8421	-29.8141	-24.7806	-5.15397	0.727431	-5.37416	-6.18974	0.999963
1092		AW558713			0.948104	1.00207	1.09542	1.00739	1.16813	1.05465	1.07284	1.08894		-14.7592	-32.2532	-3.01184	-31.8087	0.892097	-14.7592	-8.17592	-4.13641
1093		AA471826			1.01583	1.09559	1.01713	1.0573	0.978088	1.068	1.07684	0.964121		-30.8032	-6.43571	-30.6031	-17.8919	-29.4359	-14.0043	-11.3189	-24.9648
1094	15212	AW212513	hexosaminidase B	Hexb	0.947235	0.964128	0.819294	0.889797	0.854189	0.8408	0.852978	1.11659		-25.1478	-27.7071	0.429183	-6.68748	-2.70809	-2.93411	-1.30231	-8.61214
1095	54138	W97905	spinocerebellar ataxia 10 homolog (human)	Sca10
1096		AA763800			1.02472	1.01282	0.863035	0.807051	0.729436	0.74366	0.69398	0.833005		-27.0626	-30.8032	0.878911	0.999235	1	0.999999	1	0.990712
1097	12955	AA032699	crystallin, alpha B	Cryab	0.957401	0.940013	1.02001	1.02142	0.933603	0.956238	1.01556	1.0801		-23.0732	-16.3068	-30.0532	-29.8141	-13.8179	-22.4879	-30.8989	-11.1491
1098	11642	AV255496	A kinase (PRKA) anchor protein 3	Akap3	0.878865	1.10868	1.0335	1.0556	0.964455	0.833698	1.04223	1.16918		-1.06487	-4.4273	-28.8964	-18.8939	-25.5097	0.829694	-23.6512	0.383847
1099	78757	AA265143	RIKEN cDNA 4921505C17 gene	4921505C17Rik	1.03599	1.09349	1.04021	1.10451	0.927581	1.31936	1.11777	1.09772		-30.1688	-18.8939	-29.5645	-16.5032	-8.50552	0.903964	-4.3252	-7.66869
1100	67439	AI132344	RIKEN cDNA 0610041O14 gene	0610041O14Rik	0.941352	1.04907	1.02516	1.08178	1.0399	1.0406	0.955417	1.13391		-10.3432	-11.7017	-13.6562	-8.22592	-12.597	-12.5275	-11.9373	-3.18929
1101	16010	AI648975	insulin-like growth factor binding protein 4	Igfbp4	1.0212	1.06942	1.08592	0.865138	0.959701	0.829598	0.732869	0.795759		-13.8363	-9.43448	-7.48405	-1.56317	-12.3131	0.161663	0.99017	0.77899
1102	381141	AI317560	similar to tropomyosin isoform 6	na	0.974445	0.959323	0.992969	1.03082	1.06957	0.867833	0.998256	1.27365		-11.0414	-7.20859	-14.1595	-9.98349	-2.06081	0.976779	-14.4214	0.999997
1103	54401	AI747607	tyrosine 3-monooxygenase/tryptophan 5-monooxygenase activation protein, beta polypeptide	Ywhab	1.05318	1.09822	1.13962	1.03317	1.02825	1.04363	0.958714	1.20522		-6.84478	-0.824471	0.721425	-10.7834	-11.7017	-8.78511	-8.87821	0.992354
1104	19242	AI035723	pleiotrophin	Ptn	1.05624	1.05991	1.07595	0.974249	1.06156	1.07448	0.871306	1.23525		-12.7329	-11.7811	-10.6087	-14.0303	-12.597	-10.7834	-6.13257	-0.652491
1105	16502	W85433	potassium voltage gated channel, Shaw-related subfamily, member 1	Kcnc1	1.08555		0.827612	1.24081		0.913575		1.20415
1106	320871	AI042819	RIKEN cDNA B230206H07 gene	B230206H07Rik	0.782953	0.781812	0.894874	0.941049	0.77481	0.975921	0.99891	0.99062		0.984359	0.952776	-3.73663	-8.50552	0.990473	-13.2903	-14.4379	-14.265
1107	64143	AI605906	v-ral simian leukemia viral oncogene homolog B (ras related)	Ralb	0.971069	0.945954	0.894274	0.947976	0.91247	0.932879	0.901877	1.10314		-11.4592	-6.2203	0.198478	-6.66463	-1.0493	-3.73663	-0.213731	-0.524517
1108		AA980470			1.01658	1.03252	1.08566	1.14501	1.17316	1.25648	1.17899	1.17125		-13.3463	-10.6963	-1.65752	0.83008	0.964754	0.999781	0.974588	0.960356
1109	27224	AA544002	transcription elongation factor B (SIII), polypeptide 3	Tceb3	0.910166	0.952488	0.85644	0.88273	0.774205	0.83517	0.852147	0.797779		-2.74531	-9.43448	0.614255	-0.347787	0.998093	0.880301	0.691732	0.989206
1110	56419	AI645426	diaphanous homolog 3 (Drosophila)	Diap3	0.967117	0.976565	1.09473	1.16043	0.984785	1.01987	1.05305	1.13959		-10.6087	-12.3855	-1.0493	0.909157	-13.558	-12.992	-6.84478	0.73528
1111	17235	AI482284	mitochondrial capsule selenoprotein	Mcsp	0.912293	1.72982	1.8944	3.93048	3.3351	1.6282	1.17455	1.71828		-13.7933	0.445997	0.995693	1	1	0.508156	-8.87821	-1.90468
1112	56016	AI853496	heme binding protein 2	Hebp2	0.928483	1.04965	1.04923	1.0466	1.01872	1.04332	1.03925	1.04328		-2.68457	-7.30019	-7.39201	-7.94682	-13.1148	-8.59874	-9.43448	-8.59874
1113	282619	AV211018	suprabasin	Sbsn	1.02243	1.30586	1.20513	1.02598	1.15274	1.0597	0.95902	1.00989		-13.8363	0.923211	-0.0224455	-13.6078	-2.06081	-10.6963	-12.3855	-14.3086
1114	12350	AA250061	carbonic anhydrase 3	Car3	0.842514	1.22172	0.638082	0.459252	0.311958	0.364939	0.546535	0.507844		-6.2203	-4.55609	0.873594	0.999933	1	1	0.995407	0.999198
1115		AA611756			0.958359	1.05095	1.06714	1.04307	0.995778	1.27452	1.08553	1.14736		-9.89268	-8.59874	-5.87191	-9.98349	-14.3908	0.998801	-3.32217	0.508156
1116		AW550046			1.03537	1.12881	1.06876	0.838667	1.22028	1.24677		1.12491		-12.8647	-7.11723	-11.2104	-9.98349	-1.85395	-3.12385	-8.4123	NA
1117		AI323712			0.896692	1.08422	0.982978	0.912974	0.892089	0.916972	0.94495	1.16097		-3.2554	-5.53064	-14.1294	-4.02588	-1.70566	-4.55609	-10.074	0.161663
1118		AA499647			1.00342	1.0156	0.990669	0.868228	0.847672	1.05967	0.965124	1.09117		-14.4026	-14.1294	-14.3625	-2.62451	-1.95606	-11.7811	-13.4012	-7.57628
1119	109624	AA510479	caldesmon 1	Cald1	1.04343	0.981508	0.879137	0.920492	0.991109	0.875654	0.743975	0.921306		-11.5408	-13.8363	-1.47135	-6.13257	-14.3086	-1.25273	0.996564	-6.2203
1120		AW412946			1.00154	1.03096	0.996193	0.965096	1.03921	1.02791	1.1213	1.28461		-14.434	-11.1262	-14.3774	-10.1641	-9.5266	-11.7017	0.362377	0.999946
1121	17344	AA547266	Msx-interacting-zinc finger	Miz1	1.05382	1.07863	0.964949	0.930944	0.945125	0.786007	0.834294	1.0861		-7.02614	-3.05908	-10.4322	-3.66592	-6.30842	0.999757	0.983371	-2.56512
1122	20692	AI593343	secreted acidic cysteine rich glycoprotein	Sparc	1.01055	1.02139	0.999088	0.965575	0.87115	0.898506	0.93451	1.19244		-13.8363	-12.1654	-14.4379	-8.97124	0.962616	0.650618	-2.1682	0.998383
1123	17191	AA386999	methyl-CpG binding domain protein 2	Mbd2	0.981248	1.0836	1.0764	1.07974	1.07304	1.03869	1.08767	1.25041		-12.992	-1.75444	-2.62451	-2.1682	-3.05908	-9.43448	-1.33833	0.999748
1124	12632	AA512729	cofilin 2, muscle	Cfl2	0.95973	0.99223	0.904802	0.935718	0.918715	0.803309	0.935812	0.899354		-9.71017	-14.2409	-0.93431	-5.03359	-2.39099	0.997437	-5.03359	-0.493815
1125	11429	W97350	aconitase 2, mitochondrial	Aco2	1.05073	1.19619	0.933838	0.920895	1.00943	0.989538	0.939754	0.876601		-7.66869	0.981776	-4.17431	-2.1682	-14.1294	-14.0303	-5.19719	0.67584
1126	67484	AI558193	RIKEN cDNA 2310005P05 gene	2310005P05Rik	0.934744	0.491854	0.650032	0.730108	1.08398	0.898299	0.83236	0.786241		-9.98349	1	0.999757	0.976779	-8.50552	-5.61525	-0.404723	0.714255
1127		AI558197			0.99934	1.20993	1.11313	0.917124	0.971711	1.05647	0.968539	1.0848		-14.4403	0.870112	-2.11417	-4.3252	-12.7329	-9.06416	-12.3131	-5.03359
1128		AW558401			1.06131	1.08815	1.08228	1.01254	1.04866	0.962472	0.993002	1.01832		-6.84478	-3.05908	-3.73663	-13.9943	-9.06416	-10.6963	-14.2875	-13.507
1129	17841	AW110038	major urinary protein 2	Mup2	0.972654	1.40425	0.80151	1.51248	0.360895	0.608185	0.218315	0.840833		-14.4128	-10.6963	-12.7993	-9.24964	-0.404723	-7.57628	0.903964	-13.3463
1130	13074	AI561913	cytochrome P450, family 17, subfamily a, polypeptide 1	Cyp17a1	1.04558	1.16788	1.42986	1.28333	1.36155	1.39929	0.838434	0.639505		-13.233	-4.9526	0.859127	-0.404723	0.574547	0.767225	-3.52645	0.986169
1131	20103	AW123651	ribosomal protein S5	Rps5	1.02066	1.01929	1.11688	1.16504	1.09915	1.22248	1.20458	1.28998		-12.3855	-12.597	0.683876	0.98529	0.142718	0.999757	0.999113	0.999998
1132	66440	AA590680	cell division cycle 26	Cdc26	0.917792	1.01817	1.13722	1.07276	0.953343	0.996563	0.969856	1.13345		-4.71298	-13.749	-0.754041	-6.93531	-10.3432	-14.4128	-12.597	-0.972061
1133	19241	AW106872	thymosin, beta 4, X chromosome	Tmsb4x	0.887039	0.901349	1.02228	1.16123	0.939179	0.871829	1.1429	1.9381		-2.93156	-4.47853	-13.7032	-0.897131	-10.9559	-1.61003	-1.85395	1
1134	20363	AW208804	selenoprotein P, plasma, 1	Sepp1	1.02285	1.06309	0.97388	0.869592	0.875662	0.790413	0.810313	0.896446		-13.1745	-7.39201	-12.7329	0.251091	0.0211863	0.993677	0.97534	-1.29522
1135	15505	AW049097	heat shock protein 105	Hsp105	1.11448	1.60693	1.38526	1.15417	1.03183	1.00211	0.941337	0.531958		-7.20859	0.999323	0.91646	-4.17431	-13.7933	-14.4379	-11.8596	0.999989
1136	64602	AA590687	iron responsive element binding protein 2	Ireb2	1.02883	1.01152	0.952143	0.866	0.835608	0.768395	0.799243	1.05915		-13.4012	-14.3281	-10.5207	-1.42639	0.614255	0.761132	0.938804	-11.4592
1137	13417	AI121650	dynein, axonemal, heavy chain 8	Dnahc8	0.904417	0.94131	1.07741	0.966789	1.20146	0.973214	0.955321	0.788334		-7.76126	-12.8647	-10.4322	-13.4547	-1.47135	-14.0303	-12.8647	-0.188297
1138		AA611210			0.952874	1.05987	1.13296	0.980886	1.19302	1.24253	1.19869	1.22357		-9.06416	-7.39201	-0.0224455	-13.4012	0.911655	0.991052	0.931422	0.978139
1139		AA616058			1.04989	1.03228	1.05789	1.01126	1.00734	0.892409	0.84032	1.23279		-9.98349	-12.3855	-8.87821	-14.1595	-14.1294	-2.68457	0.721425	0.943844
1140		AI173369			1.10546	1.08126	1.09104	1.08609	1.10413	1.06302	1.20919	1.10596		-0.972061	-3.32217	-2.1682	-3.80798	-1.0493	-6.04526	0.981776	-0.93431
1141		AW258347			0.910566	0.85282	0.947076	0.84247	0.886263	0.729121	0.724028	0.894347		-2.99498	0.63284	-8.69195	0.784667	-0.685802	0.99993	0.999956	-1.29522
1142	26360	AI573606	angiopoietin-like 2	Angptl2	1.00946	1.06378	0.863964	0.892717	0.86244	0.8125	0.960961	1.05976		-14.1881	-6.39693	0.67584	-0.404723	0.706918	0.989537	-10.9559	-7.02614
1143	14081	AI195250	fatty acid Coenzyme A ligase, long chain 2	Facl2	0.997874	1.00719	0.933681	0.931139	0.895906	0.867057	0.851233	0.951294		-14.4214	-14.265	-4.17431	-3.73663	-0.0224455	0.816024	0.938804	-7.57628
1144		AA286093			1.05548	1.01942	0.960849	0.937937	0.924282	1.04709	1.157	1.17306		-11.377	-14.0303	-12.6655	-10.3432	-8.69195	-12.1654	-2.27826	-1.42639
1145	12166	AW260128	bone morphogenetic protein receptor, type 1A	Bmpr1a	1.054	1.02802	1.15601	1.33726	1.29496	1.26144	1.07918	1.11004		-9.5266	-12.8647	0.0424036	0.999019	0.994434	0.978789	-5.95837	-2.5064
1146	94185	AI850244	tumor necrosis factor receptor superfamily, member 21	Tnfrsf21	0.974002	1.11627	0.983554	0.999163	0.998005	0.875775	1.08674	1.20562		-11.4592	0.142718	-13.1745	-14.4379	-14.4214	0.883529	-1.01039	0.997963
1147	19385	AI836209	RAN binding protein 1	Ranbp1	0.993439	1.05443	1.348	1.33706	1.30998	1.03181	1.08286	1.24884		-14.3625	-9.80157	0.998675	0.997963	0.994253	-12.6655	-5.95837	0.943844
1148	14030	AI465022	Ewing sarcoma homolog	Ewsh	1.06034	0.941429	1.1222	1.08172	1.10473	1.10073	0.799632	0.877363		-11.7811	-11.6216	-6.48581	-9.98349	-7.94682	-8.31909	-0.11465	-5.11512
1149	26943	AI226304	tumor differentially expressed 1	Tde1	0.957063	1.01014	0.909983	0.815821	0.879412	0.950778	0.957996	1.01379		-7.48405	-13.957	-0.0909675	0.999579	0.86288	-6.04526	-7.76126	-13.558
1150		AW682577			1.06991	1.12484	0.982246	1.08669	0.923952	0.949688	0.983066	0.946925		-8.97124	-3.12385	-13.8779	-6.30842	-8.69195	-11.0414	-13.9182	-9.98349
1151		AA821652			1.07344	1.08535	1.0045	1.18646	1.13528	1.01261	1.0173	0.95629		-9.43448	-9.80157	-14.4379	-7.11723	-5.53064	-14.3281	-14.0978	-13.1148
1152	54338	AA821651	solute carrier family 23 (nucleobase transporters), member 2	Slc23a2	1.05851	1.07888	1.05154	1.05199	1.1473	1.01768	1.05122	1.08337		-5.44652	-2.33429	-6.84478	-6.75454	0.859127	-13.1745	-6.84478	-1.85395
1153	51886	AA797522	DNA segment, Chr 3, ERATO Doi 330, expressed	D3Ertd330e	1.01462	0.946764	0.987257	0.973599	0.919474	0.999001	1.06682	1.07345		-12.6655	-1.95606	-13.054	-9.34215	0.63284	-14.434	-0.587461	-0.0224455
1154		AA275311			1.08054	0.958495	0.997307	0.981806	0.919524	0.941003	1.09251	1.00819		-5.95837	-11.1262	-14.4285	-13.749	-5.11512	-8.4123	-4.55609	-14.3086
1155	11947	AI840187	ATP synthase, H+ transporting mitochondrial F1 complex, beta subunit	Atp5b	0.955019	0.944457	0.965135	0.962546	0.921023	0.939408	0.996954	1.07697		-5.03359	-2.68457	-7.85397	-7.11723	0.123407	-1.85395	-14.3774	-0.463619
1156	68643	AA267309	RIKEN cDNA 1110013I11 gene	1110013I11Rik	0.954387	0.952178	0.945737	1.04352	0.857566	1.04812	0.989835	0.946601		-10.2539	-9.89268	-8.69195	-10.8699	0.3914	-10.1641	-13.9943	-8.97124
1157	320914	AA881631	RIKEN cDNA A630044M17 gene	A630044M17Rik	0.999054	1.0003	0.974727	1.00121	0.951687	0.98535	0.935261	1.07113		-14.4379	-14.4403	-12.0142	-14.434	-7.20859	-13.6078	-3.95261	-3.66592
1158	22070	AI097696	tumor protein, translationally-controlled 1	Tpt1	0.999772	0.990762	0.945312	0.957674	0.959887	0.782393	1.02735	1.06027		-14.4411	-14.4026	-12.9289	-13.558	-13.6562	-1.42639	-14.0978	-12.8647
1159		AW553683			0.925806	0.966801	0.965343	1.09254	0.952785	0.932774	1.06521	1.11108		-5.61525	-12.0903	-11.8596	-4.02588	-9.98349	-6.66463	-7.66869	-2.2229
1160	78920	AI326055	dihydrolipoamide S-succinyltransferase (E2 component of 2-oxo-glutarate complex)	Dlst	0.94408	1.0551	1.07442	1.01144	0.984065	1.04677	1.17613	1.13484		-8.87821	-9.43448	-6.66463	-14.1595	-13.9182	-10.6087	0.471645	-0.897131
1161	23881	AI851553	expressed sequence AA409541	AA409541	0.900082	0.881064	1.00437	0.979935	0.838567	0.937187	0.943349	1.08447		-4.24945	-2.33429	-14.4128	-13.8363	0.142718	-9.24964	-10.074	-7.11723
1162	12494	AA929177	CD38 antigen	Cd38	0.952191	0.985159	1.27089	1.23796	1.12799	1.0464	1.1298	1.08334		-7.66869	-13.6078	0.999781	0.998436	0.432767	-8.4123	0.484073	-2.39099
1163		AA656606			0.968937	1.02986	1.07824	1.07998	0.896945	1.04962	1.06466	1.10069		-12.457	-13.1148	-6.93531	-6.66463	-2.1682	-10.6087	-8.69195	-3.45769
1164	20250	AA024368	stearoyl-Coenzyme A desaturase 2	Scd2	0.925664	1.01752	0.933177	0.949598	0.932003	0.902265	0.985875	1.02769		-8.03976	-14.0978	-8.97124	-11.7017	-8.50552	-4.55609	-14.0648	-13.2903
1165		AV240878			1.01144	1.02143	0.940203	1.02241	0.9609	0.994929	1.00966	1.00469		-13.1745	-10.5207	-0.404723	-10.1641	-4.47853	-14.1881	-13.507	-14.2152
1166	27045	AW045778	nitrilase 1	Nit1	1.27017	0.929155	1.10624	1.21	1.29945	1.3412	1.33501	1.14942		-1.85395	-12.0903	-10.3432	-4.17431	-1.0493	-0.26596	-0.347787	-7.57628
1167	270584	AA920176	similar to 60S ribosomal protein L23a	na	0.984552	0.997697	1.07623	1.08701	0.843829	0.930427	0.899291	0.810581		-13.7032	-14.4214	-4.17431	-2.80672	0.927425	-4.40157	-0.652491	0.993677
1168	66890	AI788956	lectin, mannose-binding 2	Lman2	1.01533	0.949418	1.14577	1.1342	1.04421	1.11267	1.17298	1.01156		-14.0648	-10.6087	-1.29522	-2.00811	-11.6216	-3.73663	-0.163309	-14.2152
1169	20054	AI836869	ribosomal protein S15	Rps15	0.983572	0.89436	0.907226	0.923749	0.803114	0.833869	1.01245	1.15647		-12.7993	0.843144	0.564067	-0.376013	0.999991	0.999657	-13.507	0.99017
1170	11433	AL024388	acid phosphatase 5, tartrate resistant	Acp5	0.916765	1.03708	1.11793	1.03839	0.820351	0.860619	1.27921	1.18508		-9.15697	-13.3463	-6.75454	-13.233	-0.86052	-3.45769	0.377036	-2.1682
1171	16781	AA690187			0.991143	1.09712	0.828583	0.925601	0.931632	0.804918	0.943071	1.00728		-13.9943	0.161663	0.999466	-0.972061	-1.70566	0.999963	-3.66592	-14.1595
1172	225131	W97169	RIKEN cDNA 1110067P07 gene	1110067P07Rik	1.08819	1.07899	0.878991	0.892449	1.04142	0.944721	1.02361	1.08651		-3.80798	-4.9526	-0.0909675	-0.93431	-10.6963	-8.03976	-13.1148	-4.02588
1173	14180	AA623627	fibroblast growth factor 9	Fgf9	1.03322	0.862139	0.95144	0.9574	1.01055	0.983347	0.919135	1.05661		-14.4026	-8.22592	-12.6655	-13.749	-14.4026	-13.9943	-12.3855	-12.8647
1174	106869	AW107967	RIKEN cDNA E130304C20 gene	E130304C20Rik	0.978229	1.09475	0.939577	0.903124	1.03936	0.965754	1.16609	1.06709		-13.8779	-7.39201	-10.6087	-6.2203	-12.7993	-13.1148	-1.80387	-10.2539
1175		AA682023			0.994573	1.21546	1.12008	1.08631	1.08706	0.810691	1.01453	1.06038		-14.3625	0.955443	-0.86052	-3.87998	-3.80798	0.980036	-13.8779	-7.57628
1176	12607	AW107708	CCAAT/enhancer binding protein alpha (C/EBP), related sequence 1	Cebpa-rs1	1.08575	1.14956	0.957287	0.906806	0.999847	0.965956	1.02504	1.07536		-5.7859	-0.524517	-11.2104	-3.80798	-14.4411	-12.3131	-14.0648	-7.11723
1177	66889	AA655932	ring finger protein 128	Rnf128	0.936809	0.940203	0.879872	0.987786	0.892804	1.0231	0.85187	0.968413		-6.39693	-8.13281	-1.70566	-14.1294	-1.25273	-13.2903	-0.0224455	-13.7032
1178		AI020715			0.952264	1.00351	0.916185	0.813703	0.827172	0.911165	0.926778	1.06747		-10.4322	-14.4128	-4.87216	0.886677	0.773177	-4.24945	-6.48581	-8.03976
1179	54673	AI020999	SH3-domain GRB2-like B1 (endophilin)	Sh3glb1	1.00641	0.867729	0.797451	0.904108	0.864849	0.84628	0.918136	1.08487		-14.3908	-2.06081	0.691732	-5.7859	-1.85395	-0.685802	-7.48405	-7.94682
1180	252876	AA162090	RIKEN cDNA 4930429M06Rik	4930429M06Rik	1.01095	1.0061	0.866077	0.934593	0.972363	0.833066	0.856843	1.26368		-14.3086	-14.3281	-2.99498	-11.2104	-13.957	-1.56317	-2.2229	0.508156
1181		AA874621			1.02363	0.916569	0.877474	0.924446	0.901888	0.939406	1.02669	1.1305		-12.5275	-1.56317	0.67584	-2.56512	-0.292766	-5.03359	-12.0142	0.508156
1182	66588	AA881645	RIKEN cDNA 0610011D08 gene	0610011D08Rik	0.951628	1.01209	0.906715	1.03237	0.844067	1.10687	1.25455	1.47427		-11.2104	-14.265	-7.85397	-13.3463	-1.21084	-5.70034	0.699411	0.992592
1183	12843	AI849281	procollagen, type I, alpha 2	Col1a2	0.938742	0.898133	0.962735	0.981404	0.91935	0.934567	0.974511	1.03967		-7.66869	-1.95606	-11.4592	-13.6562	-4.55609	-6.93531	-12.992	-11.377
1184	100321	AA199550			0.924015	0.772423	0.786331	0.8317	0.650608	0.674303	0.858806	0.824281		-5.7859	0.992354	0.981213	0.754893	0.999999	0.999996	0.161663	0.834542
1185	16480	AA989766	junction plakoglobin	Jup	0.944314	0.888154	1.06282	1.06311	0.88634	0.835582	0.970431	0.982933		-5.95837	0.405473	-5.27979	-5.27979	0.458955	0.984831	-11.377	-13.3463
1186	68658	AA939474	RIKEN cDNA 1110034C16 gene	1110034C16Rik	0.969871	0.983163	0.97747	0.842637	0.827135	0.92311	0.913425	1.01535		-13.3463	-14.0978	-13.8363	-0.685802	-0.0448708	-8.31909	-7.11723	-14.1595
1187	17178	AA592604	FXYD domain-containing ion transport regulator 3	Fxyd3	1.05721	0.874574	1.07643	1.04423	1.1604	0.971583	0.966573	1.01575		-11.377	-4.87216	-11.7811	-13.3463	-5.61525	-13.8363	-13.507	-14.2875
1188		AA145226			1.06449	1.1353	1.10236	1.02178	1.0893	1.15605	1.03221	1.09822		-9.80157	-3.95261	-5.70034	-13.8363	-9.06416	-5.87191	-12.9289	-9.15697
1189	56048	AI987967	lectin, galactose binding, soluble 8	Lgals8	0.854241	0.997024	0.898504	0.908737	0.904324	1.03023	1.10603	1.05755		0.940529	-14.4026	-0.0224455	-0.71965	-0.376013	-11.377	-0.347787	-6.13257
1190	27981	AW213538	DNA segment, Chr 4, Wayne State University 53, expressed	D4Wsu53e	0.971394	0.906194	1.05244	0.901144	0.840326	0.804124	0.934623	0.751128		-11.8596	-1.01039	-7.76126	-0.619712	0.956722	0.997437	-4.79228	0.99998
1191	192193	AA920260	ER degradation enhancer, mannosidase alpha-like 1	Edem1	1.0475	1.23021	0.908014	0.977344	0.963734	0.853351	1.01746	0.906835		-11.9373	0.419261	-6.30842	-13.7933	-12.7993	-2.1682	-14.0648	-6.2203
1192	18777	AI510294	lysophospholipase 1	Lypla1	0.943232	1.02596	0.957626	0.84872	0.832414	0.898012	1.02857	0.954193		-9.24964	-13.233	-11.294	0.284484	0.650618	-2.93156	-12.992	-10.8699
1193	13996	AI563639	ethanol decreased 2	Etohd2	1.04616	1.01427	0.911171	0.932767	0.664	0.769629	1.09461	0.903949		-12.3855	-14.3461	-12.2397	-12.3131	0.851333	-8.31909	-10.2539	-9.24964
1194	13996	AI563639	ethanol decreased 2	Etohd2	0.973784	1.11036	0.990502	0.984078	0.915251	0.929771	1.15905	1.01475		-12.457	-1.0493	-14.3908	-13.7032	-2.56512	-6.2203	0.594835	-13.4547
1195	18700	AA189964	phosphatidylinositol glycan, class A	Piga	0.937189	1.00178	0.831542	1.21156	1.09148	1.06161	1.00125	0.881489		-9.34215	-14.3908	0.161663	-1.42639	-7.66869	-12.0142	-14.3281	-4.09978
1196		AI563656			1.0936	1.10523	0.973877	0.958979	1.05347	1.03847	1.02963	1.03305		-1.80387	-0.86052	-12.2397	-9.5266	-7.57628	-10.2539	-11.7811	-11.2104
1197		AA105218			1.02818	1.06901	0.987025	0.871254	0.853752	0.794138	0.725359	0.764239		-12.6655	-6.75454	-14.0303	0.0836677	0.594835	0.988864	0.999944	0.998719
1198		AI313904			0.998699	1.02186	0.944141	0.972266	1.06228	0.900542	0.98052	1.03028		-14.434	-12.2397	-4.24945	-10.8699	-3.66592	0.496242	-12.597	-10.5207
1199	12848	AW146432	COP9 (constitutive photomorphogenic) homolog, subunit 2 (Arabidopsis thaliana)	Cops2	0.982339	1.17044	1.05462	1.03585	0.900183	0.787593	0.955601	0.951646		-13.7933	0.31658	-9.61851	-12.0903	-2.68457	0.980036	-10.7834	-10.1641
1200	55980	AW321594	inositol (myo)-1(or 4)-monophosphatase 1	Impa1	0.860901	1.13304	0.911869	0.871196	0.829942	0.905596	0.967174	1.04761		-3.80798	-4.63424	-9.15697	-6.84478	-0.86052	-10.074	-13.6078	-12.8647
1201	11877	AA498261	armadillo repeat gene deleted in velo-cardio-facial syndrome	Arvcf	1.04742	0.978992	0.899158	0.834019	0.764779	0.802675	0.83237	0.910654		-10.6963	-13.558	-2.68457	0.706918	0.994778	0.943844	0.594835	-4.02588
1202	19766	AA967070	receptor (TNFRSF)-interacting serine-threonine kinase 1	Ripk1	0.966408	1.01141	0.91072	0.91364	0.954464	0.958898	1.01691	1.11803		-6.30842	-13.233	0.906594	0.873594	-2.93156	-4.02588	-11.8596	0.986169
1203	218236	AA967108	cDNA sequence BC010304	BC010304	1.01573	0.945111	0.911394	0.930386	0.920006	1.03759	0.827831	1.12571		-14.2152	-11.7017	-8.13281	-10.2539	-9.06416	-13.1745	-0.86052	-7.85397
1204	22003	AA266471	tropomyosin 1, alpha	Tpm1	0.97327	0.942863	0.853718	0.895145	0.904384	0.98085	0.973054	0.914564		-12.992	-8.69195	0.377036	-2.06081	-2.99498	-13.6562	-12.9289	-4.3252
1205		AW211695			0.977694	0.956451	1.02523	0.902778	0.917882	0.94978	1.00903	1.04134		-13.6562	-11.9373	-13.507	-5.19719	-6.39693	-10.7834	-14.3086	-12.0903
1206	18976	AW047262	pro-opiomelanocortin-alpha	Pomc1	0.958623	0.926723	0.979132	1.12663	1.05586	1.13187	1.21785	1.1605		-7.76126	-1.56317	-12.3855	0.773177	-5.03359	0.83008	0.999428	0.97136
1207	14705	AA980499	Bernardinelli-Seip congenital lipodystrophy 2 homolog (human)	Bscl2	0.887301	0.948289	1.05096	1.0472	1.0448	1.01099	0.860938	0.88553		-0.292766	-8.97124	-9.5266	-10.9559	-9.80157	-14.265	0.405473	-3.87998
1208	21917	AI195756	thymopoietin	Tmpo	1.06675	1.69901	1.92638	1.85445	1.64716	1.78877	1.8742	1.50597		-4.55609	1	1	1	1	1	1	1
1209	12499	AA467416	ectonucleoside triphosphate diphosphohydrolase 5	Entpd5	1.01718	1.02587	1.07459	1.0335	0.990518	1.03649	1.13978	1.11002		-13.2903	-12.0142	-3.95261	-10.6087	-14.0648	-10.074	0.754893	-0.0224455
1210		AA462408			0.960093	1.06992	0.982929	0.901648	0.837666	0.939343	0.904571	1.06416		-12.2397	-9.15697	-14.0303	-4.79228	0.0211863	-9.71017	-5.11512	-9.80157
1211	78070	AI036804	carnitine palmitoyltransferase 1c	Cpt1c	1.04348	1.10564	1.36719	1.31611	1.15986	1.12862	1.10955	1.08677		-9.24964	-0.652491	0.999999	0.999973	0.847289	0.347418	-0.433924	-2.27826
1212		AI851638			0.994728	1.06444	0.974581	0.932774	0.933865	0.8996	0.981706	0.9666		-14.3461	-5.87191	-12.457	-4.71298	-4.87216	-0.619712	-13.4012	-11.1262
1213	19240	AI157351	thymosin, beta 10	Tmsb10	0.924841	0.965549	0.911519	0.837695	0.72913	0.764572	0.798304	0.850685		-7.02614	-12.5275	-5.19719	0.362377	0.998093	0.982855	0.892737	-0.0448708
1214	11883	AI006214	arylsulfatase A	Arsa	0.956533	0.970015	0.982922	0.894188	0.831686	0.940062	0.967931	1.04488		-5.49786	-5.96837	-6.26733	-2.25957	0.157456	-4.74297	-5.91751	-5.53125
1215	20778	AI037085	scavenger receptor class B, member 1	Scarb1	0.930187	0.968348	0.989161	0.999037	0.841054	0.842906	0.963793	1.02742		-0.684282	-4.49138	-6.16586	-6.41553	0.995835	0.995129	-4.01214	-4.98473
1216	17283	AA000099	multiple endocrine neoplasia 1	Men1	0.881237	0.959781	1.37935	1.19869	1.21888	0.862512	1.02488	0.993483		-3.70022	-6.06262	0.559845	-1.93736	-1.44965	-2.98695	-6.29553	-6.40759
1217	76709	AA881633	actin related protein 2/3 complex, subunit 2	Arpc2	1.19472	0.897401	1.02257	0.938653	0.979313	0.945205	0.989842	0.963844		0.10631	-2.34241	-6.16586	-4.61826	-6.20245	-4.94521	-6.36278	-5.75076
1218	13627	AA869506	eukaryotic translation elongation factor 1 alpha 1	Eef1a1	0.969039	1.23419	1.0112	0.921819	0.96015	1.11932	0.986555	1.01687		-4.5762	0.999776	-6.14654	-0.165502	-3.6107	0.763746	-6.04001	-5.83674
1219	67095	AW259587	RIKEN cDNA 2310001H13 gene	2310001H13Rik	0.976153	1.3162	1.95414	1.99634	1.92484	1.60505	1.63339	1.51962		-6.26733	0.464584	0.999978	0.999988	0.999965	0.994129	0.996327	0.975963
1220	56455	AU080559	dynein, cytoplasmic, light chain 1	Dnclc1	0.941532	1.00234	1.02585	1.02209	0.934831	1.04218	1.11609	1.32555		-1.20759	-6.40344	-4.94521	-5.28784	-0.628843	-3.16396	0.840344	1
1221	12827	AA041615	procollagen, type IV, alpha 2	Col4a2	0.993964	0.970227	1.02196	1.12062	1.05497	1.05278	1.148	1.06387		-6.26733	-3.38689	-4.66009	0.989812	-0.495876	-0.684282	0.999223	0.123625
1222	68003	AI843892	RIKEN cDNA 3110001O07 gene	3110001O07Rik	1.3526	1.54889	0.78589	1.23796	0.766863	1.07663	1.07669	0.892692		0.993754	0.999985	0.934135	0.827954	0.973026	-3.78963	-3.56592	-1.41416
1223		AA002947		ESTs, Weakly sim	0.933297	0.977585	1.04708	1.14243	1.07857	1.18813	1.28371	1.22823		-0.601607	-5.25131	-2.72485	0.962062	-0.187101	0.998181	0.999998	0.999891
1224	14705	AI047345	Bernardinelli-Seip congenital lipodystrophy 2 homolog (human)	Bscl2	1.05056	1.19503	0.991603	1.01066	0.870704	0.897373	1.12436	1.05864		-3.43162	0.982564	-6.30855	-6.23629	0.840344	0.33904	0.550027	-2.72485
1225	13717	AI385539	elastin	Eln	0.79839	1.23717	0.983542	1.04244	0.629409	0.806462	0.707885	0.904064		-2.21847	-2.51056	-6.37931	-6.20245	0.746208	-2.42609	-0.0820855	-5.25131
1226	27981	AA939583	DNA segment, Chr 4, Wayne State University 53, expressed	D4Wsu53e	0.96253	1.01838	0.99631	0.96504	0.903405	0.918118	0.99596	1.06651		-1.0123	-4.49138	-6.32086	-1.37896	0.997722	0.980957	-6.30855	0.790602
1227	13418	AI508253	DnaJ (Hsp40) homolog, subfamily C, member 1	Dnajc1
1228	22287	W13046	secretoglobin, family 1A, member 1 (uteroglobin)	Scgb1a1	0.973653	0.970657	0.963371	0.98352	0.895644	0.950708	1.04202	1.00712		-3.87884	-3.38689	-2.30088	-5.28784	0.98704	-0.684282	-1.7442	-6.20245
1229	19309	W78550	muscle glycogen phosphorylase	Pygm	1.00235	0.951078	1.18499	1.1105	0.938053	0.926138	1.00779	0.896909		-6.41099	-4.27586	0.810096	-0.712486	-3.25296	-2.34241	-6.3534	-0.548101
1230		W76735			0.945126	1.03743	1.02077	0.858276	0.803061	0.842515	0.925159	1.03096		-3.92336	-4.01214	-6.01676	0.578933	0.97224	0.785459	-4.23224	-5.56414
1231	12874	AA198901	carboxypeptidase D	Cpd	1.01542	0.912455	0.963028	0.996594	0.921269	0.906494	0.984054	1.15788		-5.89118	0.404557	-3.74494	-6.39287	0.0343208	0.578933	-5.83674	0.982043
1232	15463	AA049862	HIV-1 Rev binding protein	Hrb	0.942933	0.990416	0.963039	0.922488	0.882655	0.885654	0.914049	0.886565		0.237472	-5.96837	-1.8593	0.879197	0.999053	0.998551	0.951242	0.99835
1233	20405	AI315075	SH3-domain GRB2-like 1	Sh3gl1	0.95873	0.898232	0.842333	0.990744	0.905871	0.971389	1.04295	0.994397		-2.05638	0.959872	0.999937	-6.1059	0.91838	-3.87884	-2.09655	-6.29553
1234		AI593980			1.20612	1.00968	0.98183	1.02528	0.990195	0.964838	1.01916	1.02583		0.0708648	-6.37142	-6.26733	-6.14654	-6.37142	-5.86425	-6.25216	-6.12655
1235	11947	AI845222	ATP synthase, H+ transporting mitochondrial F1 complex, beta subunit	Atp5b	1.01665	1.02465	1.01501	1.0187	1.04769	0.984454	1.08595	1.06347		-5.80864	-5.13931	-5.91751	-5.65982	-2.76819	-5.86425	0.0708648	-1.30949
1236	18521	AW412548	poly(rC) binding protein 2	Pcbp2	0.898044	1.13333	0.99888	1.11862	1.06915	1.09171	1.14892	0.982126		-0.574693	0.0708648	-6.41553	-0.370877	-3.03106	-1.59461	0.416991	-6.08459
1237	12314	AA087146	calmodulin 2	Calm2	1.00798	1.00882	1.00451	0.98368	0.991928	1.04557	1.13717	1.09145		-6.25216	-6.21971	-6.36278	-5.75076	-6.25216	-2.68166	0.962062	0.441211
1238	21959	AA144925	transition protein 2	Tnp2	1.00785	1.03121	0.990285	1.04814	0.979027	1.06373	1.09768	1.09595		-6.14654	-3.20842	-5.99288	-1.0123	-4.66009	0.190234	0.939282	0.928589
1239		AA033187			0.994958	1.00741	0.991695	0.998825	0.944343	0.970383	1.01558	1.0468		-6.32086	-6.21971	-6.16586	-6.41099	-0.548101	-3.78963	-5.59655	-1.70638
1240		AV047620			1.00232	0.999637	0.946772	0.932285	0.930017	0.983085	1.04615	1.04383		-6.37931	-6.41553	0.453002	0.882264	0.909266	-4.70166	-0.231204	-0.444927
1241	11434	AI644079	preproacrosin	Acr	0.914408	0.970183	0.946305	0.930228	0.849211	0.979295	0.987115	0.980139		-1.04406	-5.35963	-3.47637	-2.1776	0.876057	-5.89118	-6.21971	-5.94325
1242	20916	AI527924	succinate-Coenzyme A ligase, ADP-forming, beta subunit	Sucla2	0.951322	1.02257	0.94154	0.946754	0.941225	0.981284	1.0764	1.04895		-0.521828	-4.36261	0.237472	-0.123202	0.252713	-4.86522	0.733888	-0.741013
1243	17246	AI596041	transformed mouse 3T3 cell double minute 2	Mdm2	1.00385	1.01844	1.06986	1.11222	1.00538	1.06513	1.10132	1.09535		-6.38647	-5.69067	-0.918969	0.707662	-6.3534	-1.27521	0.498102	0.325249
1244	78294	AI156833	ribosomal protein S27a	Rps27a	0.945503	0.93091	0.889834	0.9548	0.870178	0.937372	0.995156	0.921135		-0.858357	0.206235	0.971434	-1.8593	0.996089	-0.187101	-6.33244	0.588209
1245	71852	AL034666	RIKEN cDNA 1700024N20 gene	1700024N20Rik	1.03224	0.986661	1.00235	1.14902	1.15822	1.12584	1.2406	1.1179		-4.66009	-6.06262	-6.40759	0.932332	0.959872	0.780203	0.999706	0.671723
1246	57294	AA597118	ribosomal protein S27	Rps27	0.931696	1.11681	1.10448	1.09004	1.07261	1.06063	1.13914	1.16356		-1.55793	0.416991	0.0708648	-0.548101	-1.59461	-2.51056	0.769349	0.922614
1247	12785	AV017620	cellular nucleic acid binding protein	Cnbp	1.00435	1.00923	0.924498	0.982988	0.923823	0.903087	1.06672	1.09211		-6.37931	-6.25216	-0.470242	-5.83674	-0.419928	0.498102	-1.44965	0.0343208
1248	27360	AA267347	adducin 3 (gamma)	Add3	1.02632	1.05914	1.02357	1.04003	1.0103	1.03857	1.11267	1.08473		-4.14457	-0.299648	-4.5339	-2.21847	-5.99288	-2.42609	0.97224	0.746208
1249	24018	AI931926	RNA guanylyltransferase and 5'-phosphatase	Rngtt	0.939819	0.979704	0.974417	1.05899	0.932892	0.936943	0.905069	1.05021		-0.495876	-5.21437	-4.90537	-0.888501	-0.022596	-0.276526	0.855614	-1.70638
1250	66542	AW045905			1.00382	1.05558	0.876072	1.00629	0.978708	1.06853	1.09821	1.0493		-6.37142	-1.41416	0.98307	-6.30855	-5.17703	-0.395245	0.707662	-2.05638
1251	57319	AA538329	sphingomyelin phosphodiesterase, acid-like 3A	Smpdl3a	1.01219	0.986403	0.949636	1.04493	1.01783	1.08348	1.06695	1.1715		-6.16586	-6.08459	-2.89907	-4.10054	-5.89118	-0.628843	-1.7442	0.967981
1252		AA473030			1.23439	1.16377	1.04107	1.03338	1.10463	1.22585	1.17053	1.09213		0.679204	-0.370877	-5.56414	-5.83674	-2.55307	0.614994	-0.209001	-3.16396
1253	14057	AA111089	sideroflexin 1	Sfxn1	1.05126	1.17157	1.17701	1.27243	1.34768	1.30153	1.38052	1.39337		-3.3422	0.94704	0.959872	0.999743	0.999996	0.999947	0.999999	1
1254	16783	AA896274	lysosomal membrane glycoprotein 1	Lamp1	1.32586	1.04143	1.09495	1.02977	0.961193	0.846836	1.12515	1.19121		0.939282	-5.65982	-3.29755	-5.99288	-5.69067	-0.253712	-1.97679	-0.0421372
1255		AW106850			1.15984	1.16069	0.998087	0.971556	0.812752	0.991565	1.22724	1.1581		-0.601607	-0.574693	-6.41553	-5.99288	0.606237	-6.37931	0.578933	-0.628843
1256	231329	AW260260	polymerase (RNA) II (DNA directed) polypeptide B	Polr2b	1.08289	1.16918	1.12949	0.830028	0.914449	0.823848	1.0343	0.899188		-4.66009	-1.66884	-2.98695	-0.769864	-4.27586	-0.574693	-6.06262	-3.6107
1257	68028	AV005103	RIKEN cDNA 3110001N18 gene	3110001N18Rik	0.980592	1.05694	1.04545	1.16075	1.37988	1.42438	1.16103	1.36842		-6.14654	-4.44865	-5.1012	0.123625	0.998769	0.999716	0.123625	0.998181
1258	320585	AW413176	RIKEN cDNA 5730405G21 gene	5730405G21Rik	0.891828	0.965316	1.20563	1.02036	1.11365	0.986584	0.978097	1.27313		-0.022596	-4.78401	0.948477	-5.96837	-0.276526	-6.20245	-5.86425	0.997058
1259	22668	AW209166	zinc finger protein 162	Zfp162	0.960087	1.15974	1.06631	1.08642	1.07808	0.929597	1.00214	1.07218		-3.56592	0.976649	-1.27521	-0.0619664	-0.470242	-0.601607	-6.37142	-0.828536
1260		AA549592			0.940233	1.01719	1.06708	0.977818	0.980655	0.954495	0.919193	1.13843		-2.42609	-6.14654	-2.1776	-5.69067	-5.86425	-3.78963	-0.799038	0.707662
1261	26931	AA545140	protein phosphatase 2, regulatory subunit B (B56), gamma isoform	Ppp2r5c	1.03259	1.0972	0.994235	1.08257	0.991317	1.04377	0.999447	1.01086		-3.38689	0.872843	-6.29553	0.640266	-6.12655	-1.93736	-6.41553	-5.99288
1262	14339	AI323872	fused toes	Fts	1.04485	1.04572	1.13694	1.23984	1.18169	1.31319	1.31296	1.20631		-3.87884	-3.78963	0.752177	0.998597	0.969754	0.999976	0.999829	0.991509
1263		AU080328			1.01459	1.05818	1.00489	0.966707	0.852806	0.930302	1.0097	1.03823		-5.99288	-2.09655	-6.37142	-4.40573	0.984507	-0.828536	-6.23629	-4.0564
1264	83768	AI536254	dipeptidylpeptidase 7	Dpp7	0.916552	1.02492	0.982082	0.972104	0.957367	0.903535	1.03998	1.25017		0.785459	-4.49138	-5.28784	-3.96779	-1.8982	0.932332	-2.46823	1
1265	21769	AA017769	testis expressed gene 27	Tex27	1.00459	1.03237	0.819988	0.919885	0.854982	0.785437	0.889691	1.00272		-6.33244	-3.11957	0.999999	0.827954	0.999911	1	0.992714	-6.38647
1266		AA260588	expressed sequence AA407659	AA407659	0.966084	0.95957	1.07235	0.924614	0.92278	0.820905	1.09427	1.10695		-4.01214	-3.25296	-0.548101	-0.0421372	0.0527314	0.999776	0.416991	0.700763
1267	11837	AA221581	acidic ribosomal phosphoprotein P0	Arbp	0.974958	1.00022	1.01727	1.00067	0.999642	1.02578	1.01596	1.03294		-4.36261	-6.41666	-5.39487	-6.41553	-6.41666	-4.36261	-5.53125	-3.38689
1268		AA511851			0.9865	1.10048	1.05879	0.967805	0.957435	1.08121	1.21487	1.13126		-6.18449	-0.628843	-3.29755	-5.17703	-4.40573	-1.70638	0.975963	0.365926
1269	66199	AA268590	RIKEN cDNA 1110039H05 gene	1110039H05Rik	0.960538	1.00956	1.03063	1.03636	1.09844	1.07086	0.959124	1.08807		-2.13696	-6.06262	-3.56592	-2.76819	0.904368	0.325249	-1.97679	0.790602
1270	27632	W59452	RD RNA-binding protein	Rdbp	1.06096	0.903166	0.906333	0.852861	0.889959	0.813713	0.863856	0.970192		-1.48545	0.671723	0.606237	0.993558	0.866188	0.999866	0.98307	-4.5339
1271	104836	AA420414	Casitas B-lineage lymphoma-like 1	Cbll1	0.975301	1.06894	1.138	0.881677	1.11831	0.880713	0.822319	1.10742		-5.65982	-2.98695	-0.0619664	-0.0421372	-0.741013	-1.10852	0.932332	-0.888501
1272		AA387675			1.0666	1.05189	1.06428	1.01014	1.04458	0.985313	0.891419	0.955401		-1.20759	-2.46823	-1.37896	-6.20245	-3.20842	-5.94325	0.81471	-2.98695
1273	19034	AI526562	hypothetical peptidylprolyl isomerase A, psuedogene	LOC19034	0.857019	0.906263	1.091	1.11561	1.19978	1.32171	1.1839	1.13699		-1.59461	-3.83426	-5.17703	-3.38689	-0.741013	0.714422	-1.14123	-2.59576
1274	246791	AA537064	oocyte specific homeobox 3	Obox3	0.967839	0.885776	0.932637	0.820357	0.962509	0.921355	1.01214	1.19364		-3.87884	-1.44965	-1.55793	-0.548101	-3.29755	-4.74297	-5.83674	0.252713
1275	14421	AA671871	UDP-N-acetyl-alpha-D-galactosamine:(N-acetylneuraminyl)-galactosylglucosylceramide-beta-1, 4-N-acetylgalactosaminyltransferase	Galgt1	0.940326	0.950717	0.889049	0.910847	0.85874	0.840668	0.836964	0.925414		-1.8593	-2.25957	0.882264	0.498102	0.990115	0.998181	0.998728	-0.123202
1276	67443	AI182370	microtubule-associated protein 1 light chain 3	Map1lc3	0.888882	1.12642	1.07629	0.958531	0.922672	1.09086	1.04717	1.17252		0.0343208	0.0708648	-2.30088	-4.66009	-1.82066	-1.37896	-4.36261	0.800561
1277		AA472250			1.0095		0.961931		1.4041		1.06948			-4.94521	-6.06262	-0.32308	-3.70022	NA	NA		NA
1278	14073	AW320175	fatty acid amide hydrolase	Faah	0.960671	1.06979	1.08857	1.24717	1.3466	1.36723	1.33097	1.18414		-4.36261	-1.97679	-0.769864	0.99835	0.999991	0.999986	0.99998	0.960981
1279	67078	AI594505	RIKEN cDNA 1700012G19 gene	1700012G19Rik	0.98829	1.09797	0.995605	1.07322	1.18344	1.14977	1.16505	1.17085		-6.23629	-1.63158	-6.20245	-2.89907	0.365926	-0.444927	0.569479	0.664091
1280	14131	AA537570	Fc receptor, IgG, low affinity III	Fcgr3	0.968517	1.10105	1.05803	1.02402	0.894651	0.755904	1.13564	1.2169		-5.62844	-1.41416	-3.65547	-5.80864	-0.949758	0.995702	-0.187101	0.926646
1281	18356	AA537147	olfactory receptor 56	Olfr56	0.942722	0.908262	0.904088	1.01283	1.07243	0.837816	0.882571	1.35146		-5.25131	-3.74494	-3.52114	-6.3534	-4.82476	-0.656401	-2.46823	0.879197
1282	20333	AI503634	SEC22 vesicle trafficking protein-like 1 (S. cerevisiae)	Sec22l1	0.967833	0.953908	1.00692	1.01762	1.08588	1.05513	0.964322	1.08228		-5.21437	-4.10054	-6.3534	-6.04001	-1.41416	-3.70022	-4.94521	-1.63158
1283	16952	AA592231	annexin A1	Anxa1	0.982312	1.07908	0.969371	0.987992	1.09161	0.974512	1.03341	1.46388		-6.06262	-2.13696	-5.39487	-6.25216	-1.37896	-5.72099	-5.28784	0.999999
1284	234671	AA734872	carboxylesterase 2	Ces2	1.06085	1.22307	0.902936	1.17205	1.11615	1.43115	1.4306	1.57274		-4.66009	0.632005	-2.30088	-0.102497	-1.8982	0.998551	0.998503	0.999973
1285		AA656263			0.999267	1.07836	1.14982	0.863664	0.825806	0.714992	1.08712	1.08508		-6.41704	-5.06273	-1.04406	-2.59576	-0.684282	0.763746	-3.38689	-3.38689
1286		AA638610			1.10089	1.11952	1.06873	0.967678	1.02951	1.10151	1.14115	1.25891		-1.04406	-0.276526	-2.94295	-5.35963	-5.56414	-1.0123	0.325249	0.990411
1287	15944	AI663521	interferon inducible protein 1	Ifi1	1.00528	1.08717	0.985211	0.973199	0.807169	0.778492	0.87604	1.02973		-6.37931	-1.34407	-6.14654	-5.56414	0.991246	0.99892	0.550027	-5.42966
1288	16785	AA718267	laminin receptor 1 (ribosomal protein SA)	Lamr1	0.991181	1.05233	1.11832	1.2879	1.16851	1.21758	1.324	1.20143		-6.25216	-2.68166	0.700763	0.999988	0.97981	0.998955	0.999999	0.99715
1289	20733	AW229298	serine protease inhibitor, Kunitz type 2	Spint2	0.992162	1.09462	1.04438	1.18708	1.22676	1.18459	1.18674	1.47776		-6.30855	-0.0820855	-3.70022	0.986647	0.998597	0.984959	0.986647	1
1290	20850	AA763337	signal transducer and activator of transcription 5A	Stat5a	0.934235	0.834256	1.10143	1.01352	0.843889	0.827812	1.08071	1.04115		-2.51056	0.942503	-0.684282	-6.20245	0.901829	0.960981	-1.82066	-4.70166
1291	14999	AA762381	histocompatibility 2, class II, locus Mb1	H2-DMb1	0.908406	1.20593	1.38753	1.3294	1.5083	1.06607	1.33182	1.04962		-3.20842	0.0887234	0.97981	0.924655	0.998884	-4.74297	0.928589	-5.42966
1292	66060	AI316065	RIKEN cDNA 0610010O12 gene	0610010O12Rik	0.968035	1.06237	1.18474	1.16074	1.33491	1.12169	1.24419	1.04248		-5.69067	-4.23224	0.47596	0.0708648	0.993356	-1.14123	0.893839	-5.28784
1293	57431	AI180850	DnaJ (Hsp40) homolog, subfamily C, member 4	Dnajc4	0.95031	1.03149	1.00269	0.97945	1.0104	0.921938	1.08542	1.6315		-3.83426	-5.32395	-6.40759	-5.91751	-6.28178	-1.52154	-1.48545	1
1294	56070	AW106188	transcription elongation regulator 1 (CA150)	Tcerg1	0.933469	1.43322	1.42375	1.08556	1.30738	1.02822	1.19882	1.29194		-2.76819	0.999994	0.999992	-1.8593	0.998809	-5.62844	0.906846	0.997722
1295	108147	AA272422	5-aminoimidazole-4-carboxamide ribonucleotide formyltransferase/IMP cyclohydrolase	Atic	0.978855	1.05966	1.0349	0.974724	1.0428	0.930093	0.962093	1.04393		-5.65982	-2.42609	-4.66009	-5.35963	-3.96779	-1.24125	-4.27586	-3.83426
1296	226414	AI181688	aspartyl-tRNA synthetase	Dars	0.993344	1.08792	0.978914	1.00937	1.0254	0.97541	0.921858	1.07019		-6.3534	-0.98087	-5.80864	-6.29553	-5.56414	-5.59655	-1.14123	-2.13696
1297	14229	AI180957	FK506 binding protein 5	Fkbp5	0.983954	1.0336	0.945672	1.07232	1.08326	1.10597	1.1197	1.03249		-5.39487	-3.03106	-0.102497	0.453002	0.746208	0.957564	0.98704	-3.20842
1298	11308	AI037401	spectrin SH3 domain binding protein 1	Ssh3bp1	0.9841	0.966235	1.01325	1.02632	1.04015	0.950121	0.993888	1.17742		-6.04001	-4.82476	-6.14654	-5.464	-5.0239	-3.3422	-6.36278	0.951242
1299	17436	AI037787	malic enzyme, supernatant	Mod1	1.06733	1.08671	1.04054	1.10575	1.01046	0.989638	0.850293	0.888356		-2.81168	-1.55793	-4.78401	-0.574693	-6.29553	-6.29553	0.840344	0.10631
1300	67996	AI060744	splicing factor, arginine/serine-rich 6	Sfrs6	1.0225	1.11614	1.15398	0.913627	1.09934	0.930745	0.97136	1.14014		-5.83674	-0.123202	0.671723	-1.04406	-0.799038	-2.25957	-5.464	0.47596
1301	23880	AA756642	FYN binding protein	Fyb	0.774497	1.29868	1.03661	1.02403	0.746265	0.78013	0.605863	1.014		-1.93736	-1.82066	-6.28178	-6.3534	-1.20759	-2.09655	0.752177	-6.39853
1302		AL022646			1.0793	1.1202	1.03462	0.916169	0.927533	1.0342	1.06484	1.07734		-2.59576	-0.521828	-5.39487	-1.8593	-2.63863	-5.42966	-3.52114	-2.68166
1303	15108	AW111486	hydroxyacyl-Coenzyme A dehydrogenase type II	Hadh2	1.01675	0.952312	0.79352	0.747995	0.959156	0.835502	0.869807	0.904565		-6.12655	-4.18847	0.992934	0.999734	-4.74297	0.911628	0.529832	-0.712486
1304	76855	AI316766			0.984541	0.915988	0.837153	0.930066	0.955885	0.907224	0.950749	1.02032		-5.91751	0.123625	0.996963	-0.712486	-3.16396	0.453002	-2.89907	-5.59655
1305	67963	W10909	Niemann Pick type C2	Npc2	0.93505	0.996808	0.969788	1.03678	1.05382	1.02507	1.19374	1.47197		-0.299648	-6.38647	-4.10054	-3.43162	-1.55793	-4.82476	0.999716	1
1306	21334	W11882	tachykinin 2	Tac2	0.905252	1.01353	0.810219	0.915519	0.859845	0.923401	0.997196	1.19709		-1.78229	-6.32086	0.810096	-3.29755	-1.59461	-4.5762	-6.41553	-0.022596
1307	56318	AI324033	acid phosphatase, prostate	Acpp	1.03827	1.52269	1.21262	0.764875	1.34658	1.33239	0.835797	1.2322		-5.72099	0.998453	0.498102	0.0887234	0.827954	0.597309	-0.888501	-1.48545
1308		W15662			1.06396	1.12556	1.05187	0.938738	1.04158	0.939525	0.965595	1.07477		-2.13696	0.632005	-3.16396	-2.01646	-4.10054	-2.09655	-4.61826	-1.34407
1309	213393	AI385607	RIKEN cDNA 8430408G22 gene	8430408G22Rik	0.973469	0.520146	0.344003	1.35408	0.279747	0.410697	0.934175	0.420672		-6.37931	0.569479	0.993148	-2.89907	0.999405	0.952573	-6.18449	0.939282
1310		AI893908			1.12167	1.00187	0.763813	1.19115	0.960196	1.0275	1.10537	0.963755		-0.741013	-6.41364	0.993754	0.707662	-5.17703	-5.83674	-1.44965	-5.35963
1311	20674	W35076	SRY-box containing gene 2	Sox2	0.942356	1.11873	1.07271	0.956292	0.901723	0.992679	1.03537	1.03941		-3.65547	-0.444927	-2.85531	-4.66009	-0.828536	-6.36278	-5.32395	-5.25131
1312	13591	W40683	early B-cell factor 1	Ebf1	1.01182	1.11583	0.964383	1.08124	1.01082	1.09518	1.01175	1.04646		-6.33244	-1.8982	-5.62844	-4.10054	-6.3534	-3.43162	-6.38647	-5.28784
1313		AI385633			1.01211	1.01319	1.07417	1.00271	0.977433	0.986202	1.09507	1.08572		-5.99288	-5.91751	0.0343208	-6.39287	-4.98473	-5.83674	0.700763	0.47596
1314	20401	AI893960	SH3-domain binding protein 1	Sh3bp1	0.902037	1.01548	1.00315	0.981833	0.88396	0.825711	0.941148	1.26571		-0.123202	-6.1059	-6.40344	-5.96837	0.487132	0.981508	-2.81168	0.998642
1315	16869	W80180	LIM homeobox protein 1	Lhx1
1316	12445	W53383	cyclin D3	Ccnd3	0.990365	1.18907	1.24588	1.2232	1.2431	1.28749	1.32851	1.37213		-6.28178	0.962062	0.997647	0.992714	0.997326	0.999716	0.999967	0.999996
1317	72401	W59204	solute carrier family 43, member 1	Slc43a1	0.851374	0.731304	0.616467	0.693013	0.592354	0.707835	0.636489	0.73579		0.296959	0.99741	0.999999	0.999776	1	0.999405	0.999996	0.99666
1318	64011	AA014757	neurogranin	Nrgn
1319	229279	AI527912	RIKEN cDNA 2610510D13 gene	2610510D13Rik	1.11678	1.19169	1.14775	1.15418	1.03265	0.971793	0.973272	0.997903		-0.0421372	0.930484	0.623582	0.707662	-5.25131	-5.464	-5.56414	-6.41099
1320	14065	AI425720	coagulation factor II (thrombin) receptor-like 3	F2rl3	0.961937	1.05078	1.057	0.873625	0.995627	0.923797	1.01669	1.22964		-5.96837	-5.0239	-4.78401	-1.70638	-6.40759	-3.70022	-6.14654	0.325249
1321	18538	AI325898	proliferating cell nuclear antigen	Pcna	0.850925	1.06823	1.09491	1.17417	0.901788	0.934757	0.94635	1.18592		0.896566	-2.42609	-1.04406	0.893839	-0.165502	-2.34241	-3.3422	0.934135
1322	11757	W91307	peroxiredoxin 3	Prdx3	0.948879	1.02615	0.955259	1.05645	1.01743	1.08216	1.08128	1.18753		-1.82066	-4.86522	-2.55307	-1.55793	-5.59655	0.123625	0.0887234	0.998955
1323	19156	AI894343	prosaposin	Psap	1.02354	1.08992	0.992414	1.02644	0.860876	0.862644	1.02206	1.1472		-5.59655	-0.548101	-6.32086	-5.39487	0.916184	0.904368	-5.69067	0.836306
1324	19038	AW475697	peptidylprolyl isomerase C	Ppic	0.965557	0.968182	0.950455	1.08528	0.965805	0.991079	1.06321	1.23203		-2.85531	-3.25296	-0.918969	0.740112	-2.89907	-6.1059	-0.0619664	1
1325	14082	AI385705	Fas (TNFRSF6)-associated via death domain	Fadd	0.855191	0.888669	0.963836	0.975321	0.937073	0.935377	0.988352	1.06545		0.985827	0.827954	-4.01214	-5.17703	-1.24125	-1.10852	-6.12655	-1.37896
1326	26414	AI893985	mitogen activated protein kinase 10	Mapk10	1.04167	1.02444	0.974922	0.897653	0.917942	0.893258	0.950413	1.03304		-4.27586	-5.59655	-5.49786	0.237472	-0.712486	0.379027	-3.3422	-4.98473
1327	97977	W97442	expressed sequence C81508	C81508	0.921966	0.972584	0.915813	0.94163	1.13829	1.0808	0.953514	1.14196		-1.30949	-5.464	-0.888501	-2.85531	0.588209	-1.52154	-3.92336	0.640266
1328	22694	AI893996	zinc finger protein 35	Zfp35	0.919187	1.02889	1.16986	0.976749	1.1337	1.06399	0.922736	1.06207		-1.8982	-5.65982	0.671723	-5.89118	0.0343208	-3.43162	-3.3422	-3.56592
1329		AA840185			0.949241	0.849108	0.833722	0.722072	0.856621	0.744313	0.897796	0.767753		-5.0239	-0.022596	0.352598	0.993754	-0.253712	0.980957	-2.05638	0.944054
1330	22355	AI894015	vasoactive intestinal peptide receptor 2	Vipr2	1.01945	0.972897	1.2455	1.20162	1.17106	1.1525	1.22851	1.21362		-5.80864	-5.21437	0.999364	0.992487	0.962062	0.901829	0.998295	0.996089
1331	17355	AA013505	homolog of human MLLT2 unidentified gene	Mllt2h	1.03912	0.922666	0.948986	0.815286	0.834616	0.864862	0.966813	1.09682		-5.39487	-2.89907	-4.61826	0.848152	0.664091	0.0343208	-5.62844	-2.1776
1332	11350	AI508191	v-abl Abelson murine leukemia oncogene 1	Abl1	0.997898	1.13985	1.10126	1.04273	1.17291	1.04629	1.10928	1.12275		-6.40759	0.909266	0.379027	-3.56592	0.986243	-3.20842	0.569479	0.774834
1333	11747	AA002439	annexin A5	Anxa5	0.942488	1.03174	0.997553	1.0854	1.02463	0.995448	1.00399	1.13621		-1.34407	-4.36261	-6.40344	0.157456	-5.06273	-6.36278	-6.37931	0.949877
1334	70350	AW545587	brain abundant, membrane attached signal protein 1	Basp1	1.01908	1.01901	1.11521	1.17159	1.10784	1.2261	1.2318	1.27852		-5.65982	-5.65982	0.740112	0.990115	0.623582	0.999716	0.999805	0.999992
1335	17869	AA009268	myelocytomatosis oncogene	Myc	1.20517	2.39137	1.47481	3.53873	2.00922	1.7386	1.29338	3.12284		-2.46823	0.999983	0.686536	1	0.999114	0.982043	-0.769864	1
1336	16653	AI322494	Kirsten rat sarcoma oncogene 2, expressed	Kras2	0.98331	1.06597	1.11321	1.19717	1.1137	1.17113	1.27275	1.24175		-5.72099	-0.918969	0.805381	0.999249	0.81471	0.995278	0.999997	0.99997
1337	13982	AI325343	estrogen receptor 1 (alpha)	Esr1	0.95343	1.01416	0.91972	0.980766	0.951668	0.97309	0.932302	1.15503		-1.82066	-5.80864	0.578933	-5.28784	-1.63158	-4.36261	0.0343208	0.99666
1338		AI324139			1.16213	1.10444	0.959814	0.890947	1.06765	0.973666	1.03988	1.14536		0.995278	0.769349	-2.94295	0.924655	-0.548101	-4.66009	-3.20842	0.984041
1339	16453	AI323318	Janus kinase 3	Jak3	0.995837	1.068	1.19773	1.0594	1.02084	0.940475	1.08591	1.20284		-6.39853	-3.20842	0.85922	-3.78963	-6.01676	-3.52114	-2.09655	0.855614
1340	19359	AI324182	RAD23b homolog (S. cerevisiae)	Rad23b
1341	12575	AI323806	cyclin-dependent kinase inhibitor 1A (P21)	Cdkn1a	0.635778	2.47103	2.75544	1.24988	0.962393	1.85708	1.48836	2.35784		0.123625	0.996327	0.999273	-3.3422	-6.29553	0.840344	-0.419928	0.992714
1342	26413	AI323208	mitogen activated protein kinase 1	Mapk1	0.968431	1.0539	1.02449	1.08114	1.04258	0.942601	0.963875	1.09622		-3.83426	-1.37896	-4.78401	0.365926	-2.59576	-0.769864	-3.20842	0.740112
1343	20599	AI322792	submaxillary gland androgen regulated protein 1	Smr1	0.972365	1.10956	1.06611	1.10421	1.11544	1.01178	1.00778	1.13937		-4.74297	0.733888	-0.98087	0.648365	0.810096	-6.08459	-6.26733	0.953869
1344	14715	AI286577	gonadotropin releasing hormone receptor	Gnrhr	0.99388	1.13147	1.2445	1.17358	1.10671	1.01084	1.07154	1.22428		-6.41099	-1.7442	0.379027	0.379027	-2.81168	-6.23629	-3.65547	0.416991
1345	18979	W17967	paraoxonase 1	Pon1	0.797295	0.839371	0.883419	0.838468	0.776453	0.868413	0.909347	0.870686		0.882264	0.429208	-0.98087	0.441211	0.953869	-0.370877	-2.38415	-0.444927
1346	54141	AI385608	sperm associated antigen 5	Spag5	0.96625	1.02429	0.889625	1.00667	0.955266	1.03126	1.19777	1.04553		-4.5339	-5.42966	0.623582	-6.33244	-3.43162	-4.86522	0.993754	-3.52114
1347	54141	AI385608	sperm associated antigen 5	Spag5	0.938054	0.911267	0.926578	0.945738	0.839052	0.947379	0.970651	1.04372		-4.5762	-3.83426	-3.96779	-5.49786	-0.102497	-5.0239	-6.01676	-5.86425
1348	22025	W36063	nuclear receptor subfamily 2, group C, member 1	Nr2c1	0.954575	1.25253	1.05665	1.10729	1.04326	1.07784	1.16875	1.12625		-4.70166	0.942503	-4.49138	-1.37896	-4.94521	-2.72485	0.352598	-0.370877
1349	22025	W36063	nuclear receptor subfamily 2, group C, member 1	Nr2c1	1.03979	1.08823	1.06053	1.14588	0.943289	1.10122	1.09185	1.18012		-4.40573	-0.712486	-2.63863	0.800561	-2.68166	-0.123202	-0.548101	0.958733
1350	20674	W35076	SRY-box containing gene 2	Sox2	1.00145	0.99684	0.96947	0.937965	0.919666	0.895064	1.07012	1.1449		-6.41553	-6.40759	-5.65982	-3.65547	-2.38415	-0.888501	-3.43162	-0.00334075
1351	20650	W41237	syntrophin, basic 2	Sntb2	1.02909	1.0171	0.920293	0.936289	0.84661	0.928751	1.08572	1.04184		-5.62844	-6.12655	-1.93736	-3.11957	0.453002	-2.55307	-1.97679	-4.90537
1352	18590	W83150	platelet derived growth factor, alpha	Pdgfa	1.0028	1.05267	0.928022	0.82566	0.965656	0.825555	0.906393	0.887755		-6.3534	-3.78963	-1.97679	0.968879	-5.06273	0.969754	-0.548101	0.22198
1353	18590	W83150	platelet derived growth factor, alpha	Pdgfa	0.957821	0.900654	0.956408	0.978723	0.978343	1.0466	0.96414	1.10946		-4.44865	-0.253712	-4.31932	-5.86425	-5.83674	-4.23224	-4.94521	-0.276526
1354	16847	AA028211	leptin receptor	Lepr	1.03398	0.982565	0.979608	0.923224	0.995594	0.944851	1.0081	0.952938		-5.42966	-6.12655	-6.01676	-2.30088	-6.39853	-3.92336	-6.37931	-4.82476
1355	20440	AA059687	beta galactoside alpha 2,6 sialyltransferase 1	St6gal1	0.889011	1.12317	0.965657	1.15896	0.959216	0.846996	1.01886	1.03287		0.840344	0.823637	-4.14457	0.977316	-3.43162	0.994129	-5.69067	-4.44865
1356	100974	AA062019			0.958782	0.975694	1.03003	1.11911	0.967993	0.948143	1.06149	0.967224		-4.44865	-5.69067	-5.35963	0.0887234	-5.17703	-3.56592	-3.03106	-5.13931
1357	19044	AA062136	protoporphyrinogen oxidase	Ppox	0.947105	0.940575	0.932704	0.958139	0.908987	0.921605	0.869951	0.927078		-1.97679	-1.34407	-0.684282	-3.20842	0.508874	0.0156308	0.968879	-0.299648
1358	18197	AA060966	neuron specific gene family member 2	Nsg2	0.887936	1.07849	1.03633	0.951321	0.928558	0.947801	1.11317	1.04088		-0.548101	-4.31932	-6.12655	-6.01676	-3.25296	-4.5339	-2.46823	-4.66009
1359	217069	AA063824	similar to estrogen-responsive finger protein	na	0.838665	1.18348	0.990005	0.802378	1.03637	0.804863	0.950007	1.14991		0.901829	0.862744	-6.30855	0.988505	-5.1012	0.986647	-3.96779	0.550027
1360	12653	W54256	chromogranin B	Chgb	0.99883	1.01631	1.05576	0.960721	0.928767	0.986051	1.10338	1.13239		-6.41553	-6.18449	-4.14457	-5.06273	-2.76819	-6.23629	-1.24125	-0.123202
1361	53311	W59642	myosin binding protein H	Mybph	0.970559	0.892244	0.781504	0.83048	0.765896	0.768276	0.905508	0.932897		-4.70166	0.795636	0.999991	0.998642	0.999998	0.999998	0.529832	-0.858357
1362		AI385677			0.967137	0.965016	1.01797	0.952629	0.887206	0.819627	1.06324	1.07797		-4.66009	-4.44865	-5.86425	-3.20842	0.714422	0.997863	-2.01646	-0.949758
1363	11836	W85093	raf-related oncogene	Araf	1.00662	0.965072	1.13069	1.18293	1.06211	1.13469	1.28808	1.16757		-6.29553	-3.6107	0.956364	0.998989	-0.949758	0.967059	1	0.996865
1364	21420	W89370	transcription factor AP-2, gamma	Tcfap2c	1.01957	0.999097	1.00532	0.945445	0.941662	1.00648	0.994254	1.03064		-5.80864	-6.41553	-6.37142	-2.63863	-2.30088	-6.34328	-6.36278	-5.0239
1365	26414	W89577	mitogen activated protein kinase 10	Mapk10	1.00159	1.08869	0.982601	0.980401	0.919406	1.15587	1.09945	1.12777		-6.40344	-1.41416	-6.14654	-6.06262	-1.24125	0.606237	-0.858357	-0.395245
1366		W91539			1.09038	0.915099	0.983906	0.851506	0.85783	0.84132	0.962801	0.912699		-1.14123	-1.7442	-5.96837	0.872843	0.823637	0.928589	-4.82476	-0.858357
1367	22330	AI385712	vinculin	Vcl
1368	22330	AI385712	vinculin	Vcl	1.07545	1.06806	1.04163	0.99577	0.978131	0.952068	0.928769	0.927667		-1.10852	-1.63158	-3.96779	-6.38647	-5.59655	-3.16396	-1.04406	-0.949758
1369		W98935			1.08568	0.922963	1.09002	1.27237	1.09257	1.13005	1.15599	1.12169		-2.51056	-2.63863	-2.25957	0.977316	-2.13696	-0.470242	0.22198	-0.769864
1370	12814	W98013	procollagen, type XI, alpha 1	Col11a1	1.0222	0.910474	0.957331	0.868355	0.835373	0.895919	1.02001	1.08247		-5.69067	-0.419928	-3.96779	0.851925	0.98307	0.365926	-5.83674	-1.0123
1371	12814	W98013	procollagen, type XI, alpha 1	Col11a1	1.04836	0.795972	0.917951	0.862871	0.837062	0.864462	0.836812	0.915575		-4.44865	0.987422	-1.70638	0.578933	0.872843	0.550027	0.876057	-1.55793
1372	11861	AA003086	ADP-ribosylation factor-like 4	Arl4	0.832132	0.872127	0.798571	0.895098	0.628891	0.964618	1.42984	0.89635		0.0887234	-1.27521	0.664091	-2.38415	0.999891	-5.80864	0.994308	-2.46823
1373	15414	AA008326	homeo box B6	Hoxb6	0.958095	0.965728	1.04157	1.03419	0.930588	1.02875	1.04492	1.11955		-5.28784	-5.62844	-5.39487	-5.86425	-3.78963	-5.86425	-5.21437	-1.63158
1374	13198	AA016906	DNA-damage inducible transcript 3	Ddit3	0.924951	0.867869	0.993631	0.543835	0.919871	0.852529	0.960231	1.01016		-2.46823	0.352598	-6.37931	1	-2.09655	0.648365	-5.0239	-6.32086
1375	56291	AI323304	phosphoserine/threonine/tyrosine interaction protein	Styx	1.07375	0.967936	0.955129	1.06002	0.910744	0.940644	0.890947	1.03836		-3.29755	-5.69067	-5.25131	-4.66009	-3.65547	-4.78401	-0.828536	-5.86425
1376	21687	AA017847	endothelial-specific receptor tyrosine kinase	Tek	0.982	0.92785	0.841518	0.775081	0.820218	1.03659	0.925503	0.985536		-6.12655	-3.11957	0.441211	0.965139	0.909266	-5.83674	-2.98695	-6.25216
1377		AA020223			0.801322	1.24684	1.27918	1.20118	1.13078	1.04586	1.20157	1.3734		0.632005	0.623582	0.810096	0.0887234	-1.82066	-5.49786	0.0887234	0.977966
1378	20671	AA024366	SRY-box containing gene 17	Sox17	1.05551	1.13537	1.36268	1.13107	1.09372	1.22127	1.34576	1.02689		-5.06273	-1.55793	0.939282	-2.25957	-4.5339	-0.187101	0.913934	-6.26733
1379	13982	AA024073	estrogen receptor 1 (alpha)	Esr1	1.01814	0.954776	1.01814	1.05837	0.997109	0.808548	1.02165	1.12675		-6.08459	-5.1012	-6.29553	-3.74494	-6.40344	0.906846	-6.21971	-0.712486
1380	13836	AA024123	Eph receptor A2	Epha2	1.16483	1.00222	1.05451	0.400334	0.968157	0.858542	1.12841	1.02162		-2.81168	-6.20245	-6.41099	0.999982	-6.14654	-3.78963	-5.96837	-6.41099
1381	12827	AA108548	procollagen, type IV, alpha 2	Col4a2	0.884955	0.983766	1.06182	1.04713	0.971071	1.02137	1.13803	1.35822		0.33904	-6.08459	-3.07527	-4.18847	-5.39487	-5.86425	0.498102	0.999968
1382	12972	AA109102	crystallin, zeta	Cryz	1.05255	0.984783	0.891729	0.971409	0.940924	1.10937	1.11262	1.12913		-1.8982	-5.80864	0.906846	-4.49138	-0.98087	0.805381	0.840344	0.942503
1383	18016	AA105153	neurofibromatosis 2	Nf2	0.981128	1.00692	0.938685	0.922306	0.827168	0.845152	0.894254	1.02445		-5.86425	-6.34328	-2.1776	-0.888501	0.991509	0.968879	0.429208	-5.53125
1384	18016	AA105153	neurofibromatosis 2	Nf2	0.981901	0.910745	0.968528	1.00144	0.912166	1.13133	0.914593	0.967054		-6.20245	-3.07527	-6.18449	-6.39853	-3.96779	-2.05638	-3.29755	-6.14654
1385	21881	AA162373	transketolase	Tkt	0.928599	1.13106	1.16996	1.44811	1.17854	1.2572	1.33345	1.26114		-1.8593	0.416991	0.866188	1	0.904368	0.99724	0.999928	0.997647
1386	14598	AA162908	gamma-glutamyltransferase 1	Ggt1	0.894896	0.865046	1.08666	0.939496	0.809694	0.809038	1.10387	0.976603		-0.276526	0.606237	-1.70638	-3.20842	0.979212	0.980391	-1.07613	-5.83674
1387	21872	AA122889	tight junction protein 1	Tjp1	0.926882	1.08351	0.915695	0.975707	0.991843	0.988835	1.05089	0.947216		-2.94295	-2.38415	-2.42609	-5.99288	-6.41704	-6.40344	-4.78401	-4.94521
1388	22236	AA137865	UDP-glucuronosyltransferase 1 family, member 1	Ugt1a1	1.08473	1.24722	1.09125	1.18528	1.22773	1.28139	1.34985	1.18868		-0.444927	0.999716	-0.123202	0.988846	0.999084	0.999964	0.999999	0.990697
1389	14275	AA139715	folate receptor 1 (adult)	Folr1	0.817339	0.946769	1.0001	0.800096	1.16001	0.767744	0.917083	0.912998		0.267707	-5.21437	-6.29553	0.0887234	-1.59461	-4.18847	-5.96837	-5.53125
1390	20280	AA146030	sterol carrier protein 2, liver	Scp2	1.05886	1.03028	1.05627	0.921745	0.874724	0.876666	0.927097	1.01359		-3.07527	-5.28784	-3.25296	-1.20759	0.679204	0.640266	-1.59461	-6.16586
1391	13135	AA139920	defender against cell death 1	Dad1	1.01867	1.01422	1.08198	1.12471	1.03021	1.0473	1.00035	1.00194		-6.08459	-6.18449	-1.8982	0.0343208	-5.464	-4.36261	-6.41666	-6.41364
1392	18478	AA140114	phenylalanine hydroxylase	Pah	0.990365	1.03278	0.710568	0.651549	0.690901	0.629298	0.580745	0.657522		-6.33244	-5.464	0.999953	1	0.99999	1	1	0.999999
1393	20918	AA138667	suppressor of initiator codon mutations, related sequence 1 (S. cerevisiae)	Sui1-rs1	0.956877	0.871971	1.05772	0.885199	0.92937	1.08937	1.13707	1.097		-5.53125	-1.20759	-5.0239	-1.82066	-4.18847	-3.56592	-1.52154	-3.20842
1394		AA111732	cadherin 23 (otocadherin)	Cdh23	0.923637	1.10032	0.979226	0.846855	0.86512	0.765155	0.975747	1.159		-3.38689	-2.98695	-6.14654	-1.8982	-1.70638	0.746208	-6.18449	-1.24125
1395	22099	AA118918	translin	Tsn	0.950219	0.893193	1.04519	1.03345	0.979111	0.895155	0.953679	1.04094		-3.11957	0.529832	-3.78963	-4.82476	-5.69067	0.47596	-3.47637	-4.14457
1396	26413	AA119251	mitogen activated protein kinase 1	Mapk1
1397	14084	AA124805	Fas-associated factor 1	Faf1	1.01142	0.900958	0.844625	1.05917	0.878326	0.938248	1.01805	0.823742		-6.26733	-0.419928	0.882264	-3.43162	0.404557	-2.94295	-6.06262	0.96414
1398	19697	AA125356	v-rel reticuloendotheliosis viral oncogene homolog A (avian)	Rela	1.0406	1.0377	0.930557	0.84582	1.01751	1.0148	1.14076	1.07637		-5.13931	-4.70166	-4.14457	0.33904	-5.06273	-5.83674	0.10631	-2.38415
1399	14745	AA124573	endothelial differentiation, lysophosphatidic acid G-protein-coupled receptor, 2	Edg2	1.00571	0.882055	0.783265	0.772185	0.829363	0.789282	0.903473	0.7788		-6.37931	0.429208	0.998642	0.999424	0.966112	0.997863	-0.346822	0.999022
1400	14745	AA124573	endothelial differentiation, lysophosphatidic acid G-protein-coupled receptor, 2	Edg2	0.975384	0.996029	1.01649	0.948558	0.919463	0.987252	1.0511	1.09776		-6.1059	-6.40344	-6.32086	-5.53125	-4.18847	-6.3534	-5.42966	-3.38689
1401	17876	AA123925	myelin basic protein expression factor 2, repressor	Myef2	1.00765	0.949008	0.973239	1.03861	0.960031	1.04398	1.17949	1.30323		-6.32086	-2.98695	-5.25131	-4.31932	-4.0564	-3.83426	0.973026	0.999973
1402	21848	AI323646	tripartite motif protein 24	Trim24	0.939497	0.994079	0.99647	0.840914	0.893378	0.905462	0.999286	1.111		-4.27586	-6.41364	-6.41704	0.33904	-1.59461	-2.72485	-6.41099	-1.97679
1403	15980	AA123774	interferon gamma receptor 2	Ifngr2	1.07369	1.14641	0.996457	1.03046	0.936413	1.01706	0.877806	1.38198		-3.96779	-1.59461	-6.41704	-6.08459	-5.464	-6.32086	-1.27521	0.989499
1404	24086	AA137282	tousled-like kinase 2 (Arabidopsis)	Tlk2	1.02915	1.06033	1.01755	1.00373	0.945429	0.948145	1.06334	0.948328		-4.94521	-2.01646	-5.83674	-6.39287	-2.25957	-2.51056	-1.78229	-2.55307
1405		AA124082			1.00082	0.939488	0.805651	1.0241	0.795554	0.848655	1.01425	0.841105		-6.41553	-2.1776	0.998769	-5.53125	0.999496	0.966112	-6.08459	0.97981
1406	16414	AA153752	integrin beta 2	Itgb2	0.921437	0.983195	0.937137	0.999337	0.835128	0.807522	1.0688	1.78658		-3.78963	-6.23629	-5.28784	-6.41553	-0.00334075	0.282454	-4.78401	0.999998
1407	18567	AA143992	programmed cell death 2	Pdcd2	0.963987	0.970355	0.870393	0.945118	0.954319	1.13235	1.13548	1.17805		-4.14457	-4.78401	0.939282	-2.13696	-3.11957	0.851925	0.872843	0.988505
1408		AA152814			0.974898	1.07433	1.08658	1.00582	0.82584	1.00948	1.04628	1.00047		-5.77998	-2.68166	-1.8982	-6.37931	0.926646	-6.32086	-4.61826	-6.41666
1409	30945	AA145819	ring finger protein (C3HC4 type) 19	Rnf19	0.925423	1.00536	0.922675	0.894241	0.989615	1.13503	1.00342	1.00185		-2.42609	-6.37931	-2.21847	-0.521828	-6.30855	-0.00334075	-6.40759	-6.41364
1410	18938	AA137633	protein phosphatase 1, regulatory (inhibitor) subunit 14B	Ppp1r14b	0.992731	1.17482	1.03477	0.990508	0.928375	0.953057	0.981939	1.26638		-6.36278	0.721045	-5.25131	-6.32086	-2.38415	-4.90537	-6.06262	0.993356
1411	17686	AA122755	mutS homolog 3 (E. coli)	Msh3	0.924323	1.04813	0.935057	0.86614	0.952173	0.908984	1.017	0.875866		-4.94521	-5.83674	-5.28784	-3.07527	-5.91751	-4.70166	-6.30855	-2.46823
1412	22214	AA122513	ubiquitin-conjugating enzyme E2H	Ube2h	0.928818	1.06163	0.97598	1.10574	1.0222	1.1841	1.11862	1.1993		-1.14123	-2.25957	-5.464	0.22198	-5.62844	0.980391	0.540024	0.991246
1413	11767	AA138127	adaptor-related protein complex AP-1, mu subunit 1	Ap1m1	0.997463	0.930192	1.10182	1.10222	1.06813	1.0835	1.12239	0.996077		-6.40344	-0.395245	0.606237	0.606237	-0.828536	0.0343208	0.872843	-6.37931
1414	17151	AA146487	cyclin D-type binding-protein 1	Ccndbp1	0.93866	0.963352	1.03431	0.963661	0.842302	0.976516	1.03237	1.07081		-4.98473	-5.89118	-5.96837	-5.89118	-0.601607	-6.20245	-6.01676	-4.78401
1415	27225	AA145121	DEAD (Asp-Glu-Ala-Asp) box polypeptide 24	Ddx24	0.953247	1.14854	1.15829	1.03373	0.967931	0.892358	1.03302	1.18607		-2.42609	0.979212	0.989177	-4.10054	-4.14457	0.879197	-4.18847	0.998402
1416	18000	AA144387	septin 2	38232	1.06194	0.970597	1.00455	0.935329	1.06321	1.05272	1.1271	1.08382		-4.31932	-6.01676	-6.40344	-4.10054	-4.27586	-5.1012	-2.01646	-3.29755
1417	12826	AA162273	procollagen, type IV, alpha 1	Col4a1	0.807815	0.961126	1.05361	1.12751	0.889908	1.00405	1.10864	1.42814		0.995424	-4.5339	-3.47637	0.429208	0.352598	-6.39287	-0.0820855	1
1418	11820	AA170656	amyloid beta (A4) precursor protein	App	0.981576	0.977452	1.01112	0.836089	0.813039	0.981485	1.11068	1.17359		-6.01676	-5.83674	-6.28178	0.924655	0.980957	-6.01676	-0.395245	0.823637
1419		AA170277			1.02608	0.869763	1.02646	0.964144	0.86667	0.943347	0.947904	0.982352		-5.69067	0.588209	-5.65982	-5.0239	0.648365	-3.3422	-4.44865	-6.06262
1420	12478	AA170492	CD19 antigen	Cd19	0.919923	1.04339	0.84825	0.926792	0.947216	0.901938	1.00894	1.19874		-3.3422	-5.83674	-0.0820855	-3.47637	-5.25131	-2.98695	-6.41553	-0.187101
1421	15081	AA170686	H3 histone, family 3B	H3f3b	0.89717	0.870935	1.05908	1.06546	0.952922	0.978006	0.926946	1.09838		0.157456	0.640266	-2.94295	-2.46823	-3.74494	-5.75076	-1.8593	-0.444927
1422	12350	AA170585	carbonic anhydrase 3	Car3	0.849554	1.14049	0.649576	0.470745	0.289525	0.359951	0.56246	0.490036		-2.25957	-3.3422	0.962062	0.99999	1	1	0.998809	0.999971
1423	17863	AA170760	myeloblastosis oncogene	Myb	0.956901	0.903926	0.913672	0.895984	0.7712	0.973768	0.89406	1.07501		-5.65982	-3.47637	-4.27586	-3.47637	0.656306	-6.23629	-2.98695	-5.13931
1424	20846	AA170538	signal transducer and activator of transcription 1	Stat1	0.930266	0.916932	0.953924	0.999724	0.827776	0.821046	1.01441	1.25666		-3.96779	-3.20842	-5.25131	-6.41704	0.453002	0.559845	-6.29553	0.819222
1425	20846	AA170538	signal transducer and activator of transcription 1	Stat1	0.976373	0.888162	0.942367	0.889615	0.782463	0.733004	0.964812	1.29569		-6.1059	-1.66884	-4.70166	-1.7442	0.882264	0.98704	-5.75076	0.922614
1426	22258	AA163181	ubiquitin specific protease 4 (proto-oncogene)	Usp4	1.02619	1.04474	0.906438	1.06901	1.00833	0.948255	1.0573	0.999673		-4.40573	-2.01646	0.896566	0.0527314	-6.18449	-0.98087	-0.741013	-6.41666
1427	53872	AA163184	GPI-anchored membrane protein 1	Gpiap1	0.911616	0.862343	0.997596	0.866993	0.941724	0.868935	0.988506	0.886923		-0.231204	0.904368	-6.40759	0.872843	-2.42609	0.855614	-6.20245	0.606237
1428	19645	AA154684	retinoblastoma 1	Rb1	1.00432	1.04967	1.01584	1.02173	1.03439	1.00352	1.0286	1.04735		-6.37142	-5.49786	-6.25216	-6.29553	-5.89118	-6.41364	-6.01676	-5.94325
1429	12977	AA163532	colony stimulating factor 1 (macrophage)	Csf1	0.921002	1.16313	1.31076	1.08837	1.08225	0.981152	1.03354	1.27599		-1.66884	0.727533	0.999342	-1.52154	-1.8982	-6.01676	-5.28784	0.997058
1430	22632	AA163488	YY1 transcription factor	Yy1	1.09188	1.11289	1.06448	1.0369	1.04835	1.09514	1.18751	1.21843		-1.8593	-0.828536	-3.56592	-5.28784	-4.61826	-1.66884	0.892267	0.960851
1431	14056	AA154768	enhancer of zeste homolog 2 (Drosophila)	Ezh2	0.974485	1.14153	1.11208	1.24552	1.04483	1.08693	1.09417	1.22034		-2.19331	0.522365	0.0747743	0.983717	-1.73953	-0.484195	-0.299554	0.960851
1432		AA163512			0.82683	0.923096	1.08232	1.26365	1.10929	0.545024	0.98117	1.07234		-0.177764	-1.73953	-2.40118	0.57436	-0.446339	0.909097	-2.41943	-1.90261
1433	12484	AA154829	CD24a antigen	Cd24a	0.803996	0.89996	0.896567	1.0522	0.908052	1.02238	1.02891	1.05338		0.860232	-0.862227	-0.390399	-1.72063	-1.11174	-2.33801	-2.37993	-1.83178
1434	17254	AA162505	solute carrier family 3 (activators of dibasic and neutral amino acid transport), member 2	Slc3a2	0.869896	1.02297	1.12734	1.17022	1.22613	1.21446	1.4115	1.3663		0.980179	-1.97046	0.930837	0.994299	0.999843	0.999661	1	1
1435	12445	AA162516	cyclin D3	Ccnd3	0.951871	1.2313	1.30223	1.10841	1.08658	1.39823	1.36523	1.32374		-1.32036	0.993763	0.999748	0.370926	-0.127605	0.999997	0.999986	0.999909
1436	14151	AA166544	ferrochelatase	Fech	1.04199	1.08808	0.936309	0.932687	0.913618	0.944636	0.949557	1.03429		-0.821179	0.739001	0.301305	0.424929	0.816081	-0.0311237	-0.264096	-1.25799
1437	21817	AA165755	transglutaminase 2, C polypeptide	Tgm2	0.966915	1.04656	1.36911	1.14335	0.924022	0.815046	1.03602	1.39095		-2.08112	-1.79535	0.999386	0.424929	-0.821179	0.937499	-2.03502	0.999703
1438	16425	AA166367	inter-alpha trypsin inhibitor, heavy chain 2	Itih2	1.02219	1.06228	1.25602	1.22013	1.31508	1.25968	0.987435	0.963275		-2.30907	-1.46425	0.960851	0.894829	0.99338	0.964808	-2.41368	-2.03502
1439	12575	AA072841	cyclin-dependent kinase inhibitor 1A (P21)	Cdkn1a	0.887768	0.796827	0.946597				1.25423	1.70377		-1.7016	-1.75829	-2.28825	-0.944903	0.697611	NA		NA
1440	19360	AA072760	RAD50 homolog (S. cerevisiae)	Rad50	1.1972	1.18813	0.926452	0.98351	1.16305	1.08369	1.03758	0.969308		0.465565	-0.52248	-1.58478	-2.43463	-1.66313	-2.05062	-2.19331	-2.32867
1441	19057	AA062279	protein phosphatase 3, catalytic subunit, gamma isoform	Ppp3cc	0.969991	0.891675	0.831203	0.962102	1.04506	0.988032	0.904537	1.00931		-2.09601	0.276912	0.930837	-1.88517	-1.72063	-2.40118	-0.0311237	-2.4299
1442	56449	AA139010	cold shock domain protein A	Csda	1.01889	0.856001	1.00727	0.897374	0.901868	1.01517	1.23566	0.894852		-2.41943	-0.986474	-2.45571	-1.38236	-1.40293	-2.45007	0.678286	-1.62418
1443	20480	AA145018	suppressor of K+ transport defect 3	Skd3	0.972619	0.994631	0.940144	1.06181	0.907571	1.01375	0.93166	0.971976		-1.86755	-2.43901	-0.371986	-0.446339	0.621774	-2.30907	-0.0311237	-1.84975
1444	21958	AA144629	transition protein 1	Tnp1	1.05093	1.05002	1.06616	1.00293	1.13348	1.11963	1.15401	1.14608		-1.64372	-1.79535	-1.38236	-2.46153	0.35969	0.131998	0.606464	0.414416
1445	21463	AA144703	t-complex protein 11	Tcp11	0.949225	0.955224	0.915796	0.938623	0.938097	0.921309	0.936038	1.06675		-1.04903	-1.40293	-0.60026	-0.924171	-1.60453	-0.76005	-1.23714	-1.27881
1446	18285	AA144819	outer dense fiber of sperm tails 1	Odf1	0.891743	1.08341	0.93718	0.909473	0.890064	0.949271	1.00184	1.13258		-0.965672	-1.81365	-1.84975	-1.83178	-1.56492	-2.1668	-2.46153	-1.06992
1447		AA144743			0.926089	1.02029	1.03146	0.987493	1.00929	0.903782	1.08059	1.0934		-0.19476	-2.21874	-1.90261	-2.36412	-2.4076	0.435299	-0.177764	0.159704
1448	19107	AA153570	DnaJ (Hsp40) homolog, subfamily C, member 3	Dnajc3	1.18544	1.03891	1.02781	0.992885	0.793446	0.885498	0.673597	0.665619		0.835758	-1.95379	-2.18018	-2.44305	0.983717	0.301305	0.999923	0.999997
1449	12189	AA167963	breast cancer 1	Brca1	0.921911	1.08498	1.06429	1.02774	1.21895	0.981981	0.830583	0.870722		-1.15357	-1.42344	-1.60453	-2.39443	0.325103	-2.40118	0.629248	-0.484195
1450		AA155514			0.929079	1.08713	1.1264	1.13845	1.13495	1.09326	0.994109	1.2383		0.0151516	0.313278	0.853587	0.915562	0.902194	0.445528	-2.43463	0.999599
1451	14225	AA161957	FK506 binding protein 1a	Fkbp1a	0.956995	1.13507	0.945064	1.06253	0.707184	0.786088	0.882391	1.11885		-2.06598	-0.299554	-1.84975	-1.75829	0.995095	0.881459	-0.335522	-0.60026
1452	13138	AA153173	dystroglycan 1	Dag1	0.996564	1.20844	1.17464	1.09104	1.06223	0.945279	0.959834	1.00871		-2.46365	0.958723	0.9113	0.0600927	-1.04903	-1.02816	-1.50477	-2.458
1453	14455	AA154585	growth arrest specific 5	Gas5	0.973227	1.114	1.11381	1.12862	1.04199	1.05497	1.26047	1.56953		-2.45007	-0.639713	-0.639713	-0.841676	-2.21874	-2.25479	0.869706	0.824183
1454	13590	AA163209	left-right determination, factor B	Leftb	1.09442	0.92215	1.03635	0.986049	1.05024	1.09519	0.880817	0.842742		-1.09083	-1.2996	-2.19331	-2.41943	-1.98692	-1.06992	-0.281761	0.25192
1455	14674	AA073262	guanine nucleotide binding protein, alpha 13	Gna13	1.04732	1.00634	0.932503	0.9446	0.968375	0.864981	0.985595	0.978695		-1.86755	-2.45571	-1.23714	-1.60453	-2.23104	-0.19476	-2.37993	-2.31903
1456	19659	AA087526	retinol binding protein 1, cellular	Rbp1	1.02677	1.02093	0.910551	0.935777	0.828596	0.789066	0.647326	1.16292		-2.23104	-2.31903	-0.484195	-1.25799	0.863455	0.975934	0.999997	0.590662
1457	19090	AA120498	protein kinase, DNA activated, catalytic polypeptide	Prkdc	1.09983	1.07939	1.07966	1.20157	1.09678	0.983993	1.03818	0.901573		-0.561176	-1.34107	-1.06992	0.798912	-0.924171	-2.33801	-2.05062	-0.353693
1458	20341	AI322955	selenium binding protein 1	Selenbp1	0.744532	1.13714	0.967734	0.839783	0.684939	1.03368	1.33014	1.78685		0.945008	-0.484195	-2.27739	0.25192	0.994945	-2.27739	0.930837	0.999994
1459	269261	W11918	ribosomal protein L12	Rpl12	1.07277	1.14527	1.2528	1.28658	1.29225	1.32725	1.44957	1.52083		-1.32036	0.186807	0.925428	0.968394	0.973144	0.989708	0.999682	0.99996
1460		AI323903			1.00506	0.915267	0.943379	1.04897	0.976073	0.848584	0.940527	1.07728		-2.45307	-1.19538	-1.77689	-1.98692	-2.33801	0.186807	-1.72063	-1.62418
1461	70861	AI323924	RIKEN cDNA 4921521F21 gene	4921521F21Rik	0.998129	1.32735	1.14198	1.01039	1.32801	1.1712	1.26939	1.21843		-2.46365	0.897337	-0.40893	-2.458	0.929075	-0.19476	0.9113	0.40376
1462	70861	AI323924	RIKEN cDNA 4921521F21 gene	4921521F21Rik	1.07565	0.987639	1.30321	1.21017	1.24757	1.15409	1.32569	1.34684		-0.986474	-2.37993	0.988444	0.860232	0.906846	0.213305	0.994945	0.99318
1463	16476	AI323925	Jun oncogene	Jun	1.2486	1.012	0.93747	1.24617	1.1201	0.789833	0.627025	0.651391		-0.127605	-2.458	-1.04903	0.226327	-0.739806	-2.44673	-1.88517	-2.08112
1464	18778	W12659	phospholipase A2, group IB, pancreas	Pla2g1b	1.05793	1.11676	0.936195	0.875722	0.832482	0.849654	0.602463	1.17101		-1.95379	-0.882828	-1.77689	-0.446339	0.336779	0.0600927	0.999906	-0.0155513
1465	15122	AI327460	hemoglobin alpha, adult chain 1	Hba-a1	1.11865	0.770461	0.997715	1.19288	1.15831	1.26935	0.693993	0.641674		-1.58478	0.276912	-2.46365	-0.679512	-1.09083	0.0600927	0.824183	0.925428
1466	76263	AI323948	glutathione S-transferase kappa 1	Gstk1	0.946734	1.04385	0.881224	0.908005	0.947433	0.852905	0.832724	0.780216		-1.25799	-1.66313	0.621774	0.0600927	-1.27881	0.884247	0.958723	0.998285
1467	381307	AI323965	LOC381307	na	0.994222	0.709526	0.851557	1.13575	1.2593	0.943975	1.47555	1.23441		-2.45994	0.969236	-0.127605	-0.719632	0.636602	-1.98692	0.990841	0.475374
1468	19043	AI324040	protein phosphatase 1B, magnesium dependent, beta isoform	Ppm1b	0.931279	1.15573	0.986437	1.01819	0.876083	1.08692	1.08339	1.26488		-1.09083	0.54895	-2.40118	-2.35574	0.264491	-1.04903	-0.821179	0.962878
1469	12466	W15895	chaperonin subunit 6a (zeta)	Cct6a	1.11968	1.09953	1.15485	1.37295	1.21094	1.17884	1.01765	0.943685		-0.000126012	-0.561176	0.382015	0.999278	0.824183	0.513238	-2.38734	-1.62418
1470	19240	AI322354	thymosin, beta 10	Tmsb10	0.959932	1.02306	1.01862	1.2016	1.07622	0.909254	1.08209	1.58706		-1.90261	-2.27739	-2.33801	0.878611	-0.965672	-0.353693	-0.80074	1
1471	170718	AA036340	isocitrate dehydrogenase 3 (NAD+) beta	Idh3b	0.973374	1.05455	0.976806	1.0017	1.02454	1.00754	0.987202	1.08347		-1.73953	-0.40893	-1.90261	-2.46153	-1.86755	-2.40118	-2.28825	0.531359
1472	12868	AI326932	cytochrome c oxidase, subunit VIIIa	Cox8a	1.10495	0.930857	1.04117	1.04989	1.12787	1.15233	0.874892	0.859126		-0.390399	-1.15357	-1.97046	-1.77689	0.0747743	0.435299	0.313278	0.566019
1473	18970	AA059718	polymerase (DNA directed), beta	Polb	0.952804	1.0202	0.989536	1.06966	1.04269	0.999551	0.982723	1.02211		-1.56492	-2.28825	-2.37219	-0.924171	-1.75829	-2.45307	-2.32867	-2.25479
1474	12925	AA062022	cysteine-rich protein 1 (intestinal)	Crip1	0.980118	1.04264	0.965853	1.0577	1.19484	0.84884	1.06578	1.10559		-2.45307	-2.26624	-2.1668	-2.33801	0.0151516	-0.211893	-2.01921	-1.40293
1475	12313	AI327027	calmodulin 1	Calm1	0.94787	1.10596	1.25208	1.1722	1.50256	1.15748	1.17316	1.50339		-1.84975	-0.76005	0.860232	0.336779	0.999682	0.145927	0.348308	0.999693
1476	16949	AA098349	lysyl oxidase-like 1	Loxl1	1.01194	1.06996	1.02993	1.02554	1.05994	1.02133	1.0181	1.09525		-2.31903	0.131998	-1.64372	-1.84975	-0.229161	-2.01921	-2.13924	0.703837
1477	22414	W44010	wingless related MMTV integration site 2b	Wnt2b	0.886468	1.1139	1.03283	0.79057	1.11683	1.00837	0.986937	0.966272		-0.882828	-0.821179	-2.19331	0.0893058	-1.21627	-2.4076	-2.4299	-2.45007
1478	22153	W84068	tubulin, beta 4	Tubb4	0.879111	1.17159	1.00411	1.00377	0.879322	0.8156	0.843449	0.976206		-0.160905	-0.0155513	-2.45994	-2.41368	-0.111166	0.54022	0.465565	-2.32867
1479	19073	AI325844	proteoglycan, secretory granule	Prg	0.860451	0.970149	1.01655	1.11645	0.837882	0.967248	1.22704	1.52872		0.807661	-2.06598	-2.33801	0.301305	0.643838	-1.98692	0.979619	1
1480	15528	AI325874	heat shock protein 1 (chaperonin 10)	Hspe1	1.07258	1.27346	1.28173	1.28797	1.2013	1.20477	1.15498	1.20667		-0.211893	0.999892	0.999933	0.999952	0.994631	0.995521	0.947775	0.995911
1481		AI325893			0.984211	0.685067	1.1827	0.912451	0.971256	0.72176	0.941953	0.725559		-2.41943	0.995383	0.186807	-1.23714	-2.30907	0.978453	-1.86755	0.974575
1482	107995	AA000468	cell division cycle 20 homolog (S. cerevisiae)	Cdc20	0.723567	1.13494	1.09265	1.13274	1.0191	0.719018	0.727679	1.10156		-0.299554	-1.98692	-2.21874	-2.05062	-2.45007	-0.264096	-0.353693	-2.12508
1483	12591	AI327188	caudal type homeo box 2	Cdx2	1.04035	1.30239	1.01799	1.28876	1.05207	0.794079	1.1305	1.46105		-1.95379	0.531359	-2.25479	0.643838	-1.79535	-0.0787164	-0.446339	0.96753
1484	20467	AA051137	transcriptional regulator, SIN3B (yeast)	Sin3b	1.0406	0.980494	1.05911	1.08982	1.06926	1.0725	1.1422	1.0732		-1.77689	-2.27739	-1.17448	-0.229161	-0.841676	-0.739806	0.54022	-0.719632
1485	21923	AA003942	tenascin C	Tnc	0.907277	1.23002	1.31788	1.2101	1.27569	1.30826	1.47923	1.60146		-0.739806	0.902194	0.988773	0.775544	0.899792	0.934244	0.999064	0.999997
1486	19185	AA004048	proteasome (prosome, macropain) 26S subunit, non-ATPase, 4	Psmd4	1.01676	1.05692	1.09129	1.11069	1.03333	0.983218	1.20754	1.23803		-2.36412	-1.48455	-0.52248	-0.111166	-2.08112	-2.35574	0.909097	0.964808
1487		AA008793			1.00403	1.03566	1.0821	0.960128	0.930266	0.928004	0.984627	1.09755		-2.44305	-1.23714	0.598625	-0.924171	0.445528	0.503976	-2.18018	0.820171
1488	17164	AI324228	MAP kinase-activated protein kinase 2	Mapkapk2	1.01154	1.08134	1.10581	1.20011	1.31014	1.16529	1.19408	1.39506		-2.37219	-0.0468426	0.513238	0.990841	0.999968	0.954146	0.987758	1
1489	13476	AA032729	deleted in polyposis 1	Dp1	0.998611	1.01151	0.985533	1.02497	1.00517	1.07282	1.0679	1.0952		-2.46277	-2.34703	-2.26624	-1.93693	-2.43901	0.0747743	-0.0948698	0.598625
1490	56150	AA033406	MAD2 (mitotic arrest deficient, homolog)-like 1 (yeast)	Mad2l1
1491	19646	AA031007	retinoblastoma binding protein 4	Rbbp4	0.968821	1.22627	1.05908	0.958481	0.988769	0.864139	0.9096	1.1335		-2.21874	0.794412	-1.73953	-2.05062	-2.43463	0.213305	-0.841676	-0.160905
1492	15901	AI322584	inhibitor of DNA binding 1	Idb1	0.829703	0.874079	0.793658	0.930075	1.45506	1.5709	1.78737	1.97776		-0.619942	-1.27881	-0.465212	-2.08112	0.557549	0.886977	0.99479	0.995785
1493	13386	AI322593	delta-like 1 homolog (Drosophila)	Dlk1
1494	20320	AI322596	stromal cell derived factor receptor 1	Sdfr1	1.0211	1.12186	1.16561	1.2065	1.16565	0.922065	0.965508	1.03096		-2.25479	0.0452614	0.856943	0.96753	0.697611	-1.34107	-1.91986	-2.03502
1495	12406	AI326777	serine (or cysteine) proteinase inhibitor, clade H, member 1	Serpinh1	0.844004	1.07934	1.20074	1.16253	1.09399	0.96175	1.03612	1.30558		0.0747743	-1.48455	-0.353693	-0.335522	-1.46425	-2.33801	-2.15315	0.860232
1496	15402	AI322633	homeo box A5	Hoxa5	1.05393	1.03964	1.30503	1.09667	1.19939	1.26288	1.25993	1.22975		-1.17448	-1.68243	0.999586	0.145927	0.978453	0.998711	0.998489	0.994125
1497	66849	AA041826	protein phosphatase 1, regulatory (inhibitor) subunit 2	Ppp1r2	1.02071	0.946671	0.968157	1.03001	1.07978	0.949597	0.980971	1.04453		-2.32867	-1.62418	-2.13924	-2.19331	-1.25799	-1.7016	-2.31903	-2.03502
1498	53414	AA044532	bystin-like	Bysl	1.05957	1.20307	1.59356	1.31597	1.28101	0.910033	1.09533	1.20411		-1.83178	0.370926	0.999912	0.947775	0.892267	-1.32036	-1.27881	0.531359
1499	19744	AI322688	RAS-homolog enriched in brain	Rheb	1.04008	1.13412	1.24772	1.07239	1.284	1.02779	0.986929	1.19328		-1.54496	0.828117	0.999151	-0.317475	0.999872	-1.98692	-2.39443	0.987034
1500	15354	AA050039	high mobility group box 3	Hmgb3	1.06994	1.05149	1.19749	0.994172	1.19813	0.986379	1.03581	1.08754		-0.561176	-1.21627	0.980725	-2.44305	0.958723	-2.34703	-1.77689	-0.0155513
1501	21930	AA051341	tumor necrosis factor alpha induced protein 6	Tnfaip6	0.935174	1.02847	1.06992	1.04665	0.932279	0.934993	0.885502	1.00441		-1.98692	-2.26624	-1.19538	-1.77689	-2.18018	-2.31903	-0.679512	-2.39443
1502	16653	AI322494	Kirsten rat sarcoma oncogene 2, expressed	Kras2	0.844431	1.2385	0.941721	0.919962	0.869239	0.765614	0.923827	1.35706		-0.580671	-1.62418	-2.28825	-1.97046	-2.08112	0.200131	-2.01921	0.445528
1503	14155	AA030303	feminization 1 homolog b (C. elegans)	Fem1b	0.973843	1.26683	1.46825		0.626843		1.13391	1.95462		-2.44305	-0.541778	-0.0627071	-2.01921	-1.11174	-1.02816		NA
1504	76366	AA105238	RIKEN cDNA 2810012L14 gene	2810012L14Rik	0.858954	1.22569	1.14273	1.24847	1.27592	1.04258	0.958273	1.00753		0.684837	0.878611	0.494579	0.9598	0.98228	-1.88517	-2.29881	-2.29881
1505	12509	AA162378	CD59a antigen	Cd59a	1.0927	1.18411	1.25262	1.37741	1.25867	1.17446	1.1	1.33363		-0.317475	0.878611	0.988105	0.999895	0.99057	0.835758	-0.144185	0.999425
1506	56551	AA116866	thioredoxin 2	Txn2	1.07213	1.15069	1.11341	1.21348	1.19685	1.145	1.20056	1.20262		-0.40893	0.88965	0.566019	0.992975	0.985045	0.863455	0.987401	0.988444
1507	14874	AA139820	glutathione transferase zeta 1 (maleylacetoacetate isomerase)	Gstz1	0.995058	1.05636	0.936848	0.930541	0.998243	0.9515	0.990242	1.01701		-2.44305	-0.60026	-0.160905	0.0747743	-2.46153	-0.821179	-2.37993	-2.21874
1508	21374	AI327297	TATA box binding protein	Tbp	0.992412	1.21528	1.05086	1.15844	0.910036	0.960687	0.923144	1.14726		-2.44673	0.869706	-1.75829	0.301305	-0.821179	-1.98692	-0.944903	0.348308
1509	20585	AA123821	SWI/SNF related, matrix associated, actin dependent regulator of chromatin, subfamily a, member 3	Smarca3	0.91509	0.852372	0.978792	1.03158	1.04266	0.759399	0.861796	1.03783		-1.42344	-0.446339	-2.39443	-2.30907	-2.26624	0.798912	-0.80074	-2.25479
1510	20585	AA123821	SWI/SNF related, matrix associated, actin dependent regulator of chromatin, subfamily a, member 3	Smarca3	0.893914	0.959688	1.04368	1.19472	0.94497		0.793098	1.15064		-0.160905	-2.19331	-0.944903	0.145927	-2.43463	-0.299554	-0.353693	NA
1511	13982	AI327373	estrogen receptor 1 (alpha)	Esr1	1.04428	1.03767	0.990256	0.981352	1.08043	1.1486	1.09547	1.05064		-1.23714	-1.50477	-2.38734	-2.18018	0.131998	0.946408	0.475374	-0.965672
1512	68831	AA153879			1.046	1.04001	1.41363		0.834785		0.781806			-2.34703	-1.68243	-0.317475	-0.353693	-2.45007	NA		NA
1513	21753	AI325946	testis derived transcript	Tes	1.08363	1.10506	0.809027	0.738588	1.18089	1.08701	0.820032	1.0355		-1.34107	-0.882828	0.25192	-0.924171	-2.08112	-1.88517	0.264491	-2.37993
1514	68240	AA142596	replication protein A3	Rpa3	0.94568	0.840148	0.899066	1.00558	0.910782	1.0313	0.783739	0.94271		-1.04903	0.972402	-0.0468426	-2.44673	-0.427577	-2.06598	0.999301	-1.23714
1515		AA138570			1.05935	1.18207	1.05066	1.00316	1.03002	1.02535	1.07553	1.02302		-1.23714	-0.0627071	-1.97046	-2.43463	-2.40118	-2.39443	-1.04903	-2.34703
1516	11933	AA139067	ATPase, Na+/K+ transporting, beta 3 polypeptide	Atp1b3	0.940254	1.2588	1.2496	0.660718	1.01234	0.925558	1.02476	1.07809		-1.88517	0.897337	0.875704	0.39296	-2.43463	-2.29881	-2.23104	-1.19538
1517	103692	AA161814			0.92967	1.22485	1.22893	1.00913	1.01253	0.875084	0.940537	1.11158		-0.659571	0.980725	0.983717	-2.42484	-2.31903	0.475374	-1.04903	0.226327
1518	19182	AA163174	proteasome (prosome, macropain) 26S subunit, ATPase 3	Psmc3	1.00188	1.08155	1.12432	1.01032	1.04121	1.18683	1.06655	1.22203		-2.46153	-0.0948698	0.72188	-2.39443	-1.54496	0.979043	-0.580671	0.995911
1519	13346	AA087855	desmin	Des	1.01223	1.24647	1.18437	1.30917	1.20065	1.14263	1.21554	1.73859		-2.41943	0.824183	-0.465212	0.940607	-0.281761	-0.127605	0.927272	0.998751
1520	21400	AI326127	transcription elongation factor A (SII), 2	Tcea2	1.06314	0.954436	1.01041	0.85555	0.966711	1.13042	0.84057			-1.04903	-2.36412	-2.06598	-2.31903	-2.30907	-0.561176	-2.13924	NA
1521	15212	AI326130	hexosaminidase B	Hexb	1.00369	1.13895	1.0099	1.04444	1.05284	1.11861	1.06514	1.06545		-2.458	0.0893058	-2.43901	-1.83178	-1.72063	-0.335522	-1.25799	-1.40293
1522	22154	AA170370	tubulin, beta 5	Tubb5	0.865081	1.06698	1.25502	1.28398	1.16351	1.09058	1.43748	1.40901		0.370926	-1.44388	0.93589	0.970057	0.455617	-0.862227	0.999637	0.999151
1523	71679	AA154397	ATP synthase, H+ transporting, mitochondrial F0 complex, subunit d	Atp5h	1.02257	1.04051	0.97941	0.981266	1.11406	1.10064	1.04559	1.04058		-2.08112	-1.40293	-2.12508	-2.19331	0.739001	0.557549	-1.19538	-1.40293
1524	66108	AA167918	NADH dehydrogenase (ubiquinone) 1 alpha subcomplex, 9	Ndufa9	1.00501	1.11539	1.0249	1.09699	1.09945	1.03317	1.03384	1.14552		-2.43901	0.884247	-1.88517	0.709956	0.744508	-1.50477	-1.48455	0.978453
1525	235431	AA124231	RIKEN cDNA E130012P22 gene	E130012P22Rik	1.04546	1.00534	1.0409	1.07929	0.931746	0.853554	0.915255	0.940969		-1.77689	-2.44305	-1.77689	-0.780363	-0.841676	0.709956	-0.19476	-1.15357
1526	22145	W11746	tubulin, alpha 4	Tuba4	1.02971	1.11802	1.076	1.04927	0.995475	1.0018	1.17514	1.10331		-1.97046	0.590662	-0.160905	-1.2996	-2.45307	-2.46277	0.951688	0.348308
1527	17880	W33517	myosin heavy chain 11, smooth muscle	Myh11	1.0316	0.842155	0.756638	0.852767	0.768391	0.759158	0.606717	0.661305		-2.05062	0.904545	0.999323	0.846668	0.998536	0.999204	1	1
1528	208715	AA061468	3-hydroxy-3-methylglutaryl-Coenzyme A synthase 1	Hmgcs1	1.07891	1.02205	0.84083	0.761028	1.08658	0.8567	0.697676	0.833891		-1.15357	-2.32867	0.684837	0.986657	-0.965672	0.494579	0.999572	0.744508
1529	21423	W41716	transcription factor E2a	Tcfe2a	1.09298	0.980532	1.0727	1.0987	1.13458	1.10053	0.827041	0.850125		-1.32036	-2.39443	-1.7016	-1.21627	-0.541778	-1.17448	0.424929	0.0747743
1530	15461	AI385418	Harvey rat sarcoma virus oncogene 1	Hras1	1.06779	1.0651	1.03031	1.01908	0.964305	0.959591	0.956149	1.02986		0.25192	0.159704	-1.50477	-2.03502	-1.13265	-0.862227	-0.679512	-1.52491
1531		AI385420	expressed sequence AI327276	AI327276	0.994695	1.25645	1.44685	1.37527	1.33758	1.11354	1.37492	1.41222		-2.45571	0.954146	0.999853	0.998669	0.995785	-0.246562	0.998626	0.999572
1532	20848	AI385862	signal transducer and activator of transcription 3	Stat3	0.890286	0.887735	0.93326	0.891703	0.928075	0.841633	0.977879	1.07473		-0.19476	-0.127605	-1.36174	-0.229161	-1.21627	0.650957	-2.32867	-1.27881
1533	11657	W70567	albumin 1	Alb1	0.968322	0.790586	0.633467	1.18298	0.583943	0.631738	1.00861	0.661285		-2.34703	0.424929	0.992975	-0.371986	0.999094	0.99338	-2.45571	0.980725
1534	18538	AI385898	proliferating cell nuclear antigen	Pcna	1.01238	1.08852	1.06933	1.06125	0.978956	0.981228	0.975836	1.04983		-2.15315	0.943575	0.755231	0.582575	-1.62418	-1.77689	-1.40293	0.173331
1535	109182	W83493			1.05536	1.19906	1.11928	1.08112	1.1231	1.04645	1.03235	1.15249		-0.80074	0.995095	0.775544	0.103687	0.807661	-1.17448	-1.75829	0.94911
1536		W97166			1.0691	1.07786	1.05376	1.00258	1.09935	1.00661	1.01703	1.02658		0.0302809	0.289184	-0.580671	-2.458	0.709956	-2.41943	-2.19331	-1.83178
1537	20014	AA000779	ribophorin II	Rpn2	1.00012	1.11693	1.20591	1.1406	1.00172	1.46171	1.12629	1.37034		-2.458	-1.50477	0.226327	-0.639713	-2.46418	-0.000126012	-1.36174	0.866612
1538		AA003413			0.989815	1.06236	1.10139	1.24207	1.20769	1.21919	1.16852	1.14809		-2.39443	-0.699533	0.40376	0.998626	0.992546	0.995655	0.954146	0.892267
1539	12314	AA044542	calmodulin 2	Calm2	0.941586	0.907956	0.853068	0.919137	0.904702	0.982064	0.997863	1.04339		-0.427577	0.621774	0.987401	0.370926	0.678286	-2.19331	-2.45994	-1.21627
1540	12476	AA050218	CD151 antigen	Cd151	0.972226	0.938159	0.942044	0.92763	0.850769	0.922237	0.885395	1.00088		-1.56492	0.226327	0.0600927	0.54895	0.999151	0.671623	0.977848	-2.46365
1541	14630	AA051435	glutamate-cysteine ligase , modifier subunit	Gclm	0.994367	1.06067	1.06801	0.863553	1.02666	0.964483	0.957102	1.07654		-2.44673	-1.17448	-0.821179	0.835758	-2.12508	-1.90261	-1.83178	-0.541778
1542	16419	AA124047	integrin beta 5	Itgb5	0.922758	0.909246	0.876269	0.917211	0.701844	0.871314	0.854275	0.908422		0.54895	0.794412	0.980725	0.671623	1	0.987034	0.997083	0.803328
1543	53376	AA139612	ubiquitin specific protease 2	Usp2	1.70845	1.73761	1.19376	0.759539	1.15496	1.00357	0.829846	1.24892		0.839467	0.866612	-1.42344	-0.484195	-1.73953	-2.46365	-1.34107	-0.986474
1544	56451	AA142482	succinate-CoA ligase, GDP-forming, alpha subunit	Suclg1	1.02336	1.05113	0.993599	0.983903	1.02931	1.06054	1.19445	1.19482		-2.06598	-0.965672	-2.4299	-2.26624	-1.86755	-0.580671	0.994125	0.994299
1545	98013	AA145022	expressed sequence C78549	C78549	0.97637	0.973164	1.01487	0.970702	1.0972	1.26108	1.10167	1.11112		-2.28825	-2.40118	-2.39443	-2.20616	-0.619942	0.95762	-0.390399	-0.317475
1546	72198	AA144221	RIKEN cDNA 2610528A15 gene	2610528A15Rik	0.888835	1.49753	1.02696	1.28482	2.31485	0.983681	0.848011	1.15517		-1.25799	0.744508	-2.45307	-0.821179	0.794412	-2.46277	-1.2996	-1.68243
1547	20005	AA163183	ribosomal protein L9	Rpl9	0.996557	1.00263	1.13124	1.24406	1.2068	1.28991	1.34924	1.25423		-2.45007	-2.45571	0.95762	0.999975	0.999672	0.999999	1	0.999988
1548	71978	AA168363	protein phosphatase 2 (formerly 2A), regulatory subunit B (PR 52), alpha isoform	Ppp2r2a	0.940977	1.09633	1.08526	1.04984	1.05969	0.916963	1.13732	1.06473		-1.34107	-0.335522	-0.719632	-1.7016	-1.42344	-0.580671	0.370926	-1.27881
1549	14121	AI325573	fructose bisphosphatase 1	Fbp1	1.12671	1.19219	1.18652	1.3385	1.26106	1.36596	1.15133	1.17603		-0.0948698	0.697611	0.65796	0.99318	0.943575	0.996897	0.301305	0.57436
1550		AA116745			1.19661	1.05471	1.13162	1.15957	1.01413	1.08115	1.08623	1.04285		0.691278	-1.77689	-0.0787164	0.348308	-2.41368	-1.15357	-1.02816	-2.01921
1551	67273	AA163564	NADH dehydrogenase (ubiquinone) 1 alpha subcomplex 10	Ndufa10	1.01244	1.03268	0.926247	0.955846	0.930666	1.06658	1.08341	1.0356		-2.21874	-1.11174	0.765573	-0.317475	0.678286	0.503976	0.816081	-0.924171
1552	13131	W64787	disabled homolog 1 (Drosophila)	Dab1	1.08303	0.863171	0.967958	1.03952	0.818191	1.14939	0.847995	1.30757		-2.31903	-1.06992	-2.37993	-2.43901	-0.335522	-1.68243	-0.882828	0.348308
1553	26462	W74987	thioredoxin reductase 2	Txnrd2	0.908592	1.05509		1.36784		0.860932	0.839884	0.931718		-2.45994	-0.924171	-0.679512	-0.177764	0.445528	-2.4076		NA
1554	14029	AA000473	even skipped homeotic gene 2 homolog	Evx2	0.956571	0.871664	0.998632	0.951481	0.871734	0.750342	1.1904	0.932811		-1.79535	0.301305	-2.43901	-2.01921	0.325103	0.991856	0.566019	-1.58478
1555	22355	AA000726	vasoactive intestinal peptide receptor 2	Vipr2	0.89398	1.00466	0.966346	0.875557	0.777462	0.867472	0.949491	0.919974		-0.503285	-2.45994	-2.26624	-0.111166	0.966645	0.325103	-1.97046	-0.882828
1556	22355	AA000726	vasoactive intestinal peptide receptor 2	Vipr2	0.907817	0.951545	1.05844	0.934993	0.902559	0.739971	0.985144	0.975907		-0.619942	-1.84975	-1.56492	-1.68243	-0.353693	0.9967	-2.42484	-2.24306
1557	55950	AI322495	brain protein I3	Bri3	0.997934	0.978171	1.00143	0.972585	1.02289	0.957429	1.07934	1.18133		-2.46277	-2.34703	-2.45007	-2.21874	-2.24306	-1.72063	-0.986474	0.875704
1558	12558	AI323006	cadherin 2	Cdh2	1.02468	1.22668	1.10038	1.17095	1.05201	1.06218	1.15714	1.17843		-2.09601	0.996491	0.348308	0.954146	-1.13265	-0.76005	0.917624	0.966645
1559	11784	AA060361	amyloid beta (A4) precursor protein-binding, family A, member 2	Apba2	0.802212	0.800014	1.27227	0.959465	1.205	1.73058	1.08727	1.09768		0.313278	-0.944903	0.145927	-2.458	-0.541778	0.621774	-1.90261	-1.04903
1560	19158	AA062131	pleckstrin homology, Sec7 and coiled-coil domains 2	Pscd2	0.978806	0.933299	1.10277	0.937695	0.900948	0.926609	0.964327	1.10109		-2.11067	-0.144185	0.606464	-0.317475	0.703837	0.103687	-1.54496	0.582575
1561	56613	AA061016	ribosomal protein S6 kinase, polypeptide 4	Rps6ka4	0.960159	0.801967	0.868217	0.990886	0.82113	0.843462	0.935197	1.1241		-1.72063	0.994125	0.789826	-2.41943	0.981257	0.93589	-0.80074	0.513238
1562	14312	AA097506	bromodomain containing 2	Brd2	0.9488	1.22942	1.20686	0.947187	1.07076	1.18843	1.19894	1.06487		-0.924171	0.998669	0.995655	-0.841676	-0.281761	0.989093	0.993574	-0.503285
1563		AA097283			0.79882	0.877229	0.893535	1.05405	1.07533	0.915423	1.07713	1.0083		0.424929	-0.821179	-1.06992	-2.19331	-1.79535	-2.00317	-1.95379	-2.46365
1564	11474	AA098356	actinin alpha 3	Actn3	0.862779	0.927222	0.948919	0.833094	0.808788	0.985296	0.911597	1.06063		-0.317475	-1.66313	-2.1668	0.213305	0.727688	-2.33801	-1.77689	-2.23104
1565	53419	AA062275	low density lipoprotein receptor-related protein 4	Lrp4	0.897172	0.857339	0.988641	0.851299	0.846519	0.923749	1.24255	0.906493		-1.42344	-0.0468426	-2.45007	-0.659571	-1.50477	-2.11067	-0.211893	-1.93693
1566	20528	AA066475	solute carrier family 2 (facilitated glucose transporter), member 4	Slc2a4
1567	12870	AA106138	ceruloplasmin	Cp	0.999796	0.883685	0.884625	0.911649	0.841224	0.698816	0.96327	1.06827		-2.46436	-1.25799	-0.561176	-2.15315	0.0747743	0.789826	-2.09601	-1.68243
1568	21808	AA068104	transforming growth factor, beta 2	Tgfb2	1.03113	1.1034	1.20505	1.09004	0.466742	1.05116	0.515535	1.19921		-2.43901	-1.7016	-0.639713	-2.19331	0.755231	-2.45307	0.531359	-0.965672
1569	15529	AA106952	syndecan 2	Sdc2	0.977511	0.857006	0.908149	0.861858	0.778321	0.683063	0.772756	0.897679		-2.34703	-0.0468426	-1.0073	-0.659571	0.727688	0.960851	0.765573	-1.32036
1570	320184	AI325749	RIKEN cDNA C330018J07 gene	C330018J07Rik	0.828948	1.017	1.2275	1.58747	1.08138	1.23091	1.04594	1.2302		0.904545	-2.35574	0.950414	1	-0.780363	0.955332	-1.77689	0.954146
1571		AA114636			1.01544	0.996035	0.939058	1.07211	1.04237	1.05839	1.08877	1.07611		-2.20616	-2.44673	0.0600927	0.289184	-0.944903	-0.19476	0.664848	0.40376
1572	13207	AA120483	DEAD (Asp-Glu-Ala-Asp) box polypeptide 5	Ddx5	0.942177	1.22689	0.947597	1.00654	1.07193	0.835001	1.06533	1.13164		-0.965672	0.99057	-1.72063	-2.43901	-0.944903	0.749918	-0.821179	0.749918
1573		AI325773			1.06343	1.0856	1.29634	1.27273	1.24083	0.994427	1.0381	1.1617		-0.719632	-0.000126012	0.999884	0.999625	0.998173	-2.44305	-1.66313	0.930837
1574	15481	AA117004	heat shock protein 8	Hspa8	1.09532	1.47993	1.31637	1.17854	1.61255	0.974636	1.24651	1.03815		-1.60453	0.970858	0.703837	-0.40893	0.996153	-2.38734	0.301305	-2.29881
1575	14055	AA124068	enhancer of zeste homolog 1 (Drosophila)	Ezh1	0.922646	0.918996	0.914631	1.26271	0.983522	0.986557	0.878088	1.04827		-1.36174	-1.58478	-1.36174	0.382015	-2.42484	-2.4299	-0.659571	-2.13924
1576	20130	AA123466	Harvey rat sarcoma oncogene, subgroup R	Rras	0.999619	0.862458	0.853462	0.943931	0.772679	0.931371	0.929697	1.02478		-2.46418	0.828117	0.906846	-1.09083	0.999386	-0.60026	-0.541778	-2.15315
1577	14470	AA123361	Rab acceptor 1 (prenylated)	Rabac1	1.01619	0.974016	1.04294	1.06484	1.02053	0.995634	1.11088	0.918731		-2.23104	-1.86755	-1.13265	-0.19476	-2.09601	-2.44673	0.807661	0.494579
1578		AA139714			1.0407	1.24988	1.5867	1.50506	1.49834	1.43047	1.5066	1.32585		-1.77689	0.992092	1	1	1	0.999995	1	0.999625
1579	66204	AA142466	acylphosphatase 1, erythrocyte (common) type	Acyp1	0.918422	1.041	0.918773	0.928557	0.971139	0.882286	0.911899	1.07018		-1.11174	-2.13924	-0.965672	-1.36174	-2.32867	-0.903478	-1.11174	-1.62418
1580	14797	AA153668	amino-terminal enhancer of split	Aes	0.96734	0.982788	0.86949	0.966251	0.893955	0.893328	0.93647	0.899848		-1.98692	-2.32867	0.709956	-1.95379	0.313278	0.336779	-1.44388	0.186807
1581	21940	AA153731	tumor necrosis factor receptor superfamily, member 7	Tnfrsf7	0.874925	0.988307	0.99407	0.974587	0.856345	1.10524	0.906849	1.24882		-0.111166	-2.43463	-2.46153	-2.26624	0.239199	-1.11174	-0.659571	0.919641
1582	16412	AA163412	integrin beta 1 (fibronectin receptor beta)	Itgb1	1.03943	1.03943	0.928299	0.972287	0.863379	0.846247	0.900779	1.05145		-1.54496	-1.54496	-0.111166	-1.93693	0.946408	0.983251	0.61418	-1.04903
1583	22720	AA162549	zinc finger protein 62	Zfp62	0.778175	0.908501	0.438206
1584	22260	AA162659	nuclear receptor subfamily 1, group H, member 2	Nr1h2	0.930503	1.01399	1.04885	0.990413	0.931648	0.952179	1.03598	1.00307		0.445528	-2.23104	-0.52248	-2.34703	0.414416	-0.465212	-1.19538	-2.45307
1585	14852	AA168982	G1 to phase transition 1	Gspt1	1.03575	1.14894	1.19248	1.11428	1.20288	0.957798	1.11274	1.07846		-1.81365	0.835758	0.970057	0.485045	0.980179	-1.54496	0.455617	-0.353693
1586	18032	AA142474	nuclear factor I/X	Nfix	0.956092	1.12343	0.936507	0.829623	0.757575	0.810135	0.887047	0.891196		-2.05062	0.465565	-1.46425	0.962878	0.999625	0.987758	0.522365	0.445528
1587	17991	AA162428	NADH dehydrogenase (ubiquinone) 1 alpha subcomplex, 2	Ndufa2	1.02584	0.882036	0.965709	1.04639	0.971672	0.924439	0.890478	0.776386		-2.15315	0.424929	-1.90261	-1.56492	-2.08112	-0.484195	0.465565	0.998669
1588	27050	AA165925	ribosomal protein S3	Rps3	1.01878	0.963347	1.05822	1.16751	1.09148	1.16318	1.2457	1.17902		-2.28825	-1.79535	-1.13265	0.886977	-0.0948698	0.869706	0.99479	0.925428
1589	21974	AA170358	topoisomerase (DNA) II beta	Top2b	1.05114	0.964343	0.976296	0.859601	0.867311	0.886879	0.946245	1.07202		-1.64372	-2.00317	-2.25479	0.678286	0.582575	0.25192	-1.48455	-1.04903
1590	18477	AA170669	peroxiredoxin 1	Prdx1	0.968965	1.05259	1.00665	1.08189	1.02011	1.03333	1.04201	1.16683		-2.1668	-1.90261	-2.43901	-1.04903	-2.33801	-2.23104	-1.97046	0.566019
1591	53381	AA170690	peroxiredoxin 4	Prdx4	0.982201	0.953995	0.972951	0.93061	0.738292	0.755764	0.745415	0.81545		-2.27739	-1.36174	-2.03502	-0.427577	0.999987	0.999406	0.999976	0.994299
1592	11843	AA170620	ADP-ribosylation factor 4	Arf4	0.973019	1.07879	0.946426	0.98921	1.01309	0.982575	1.04827	0.799518		-2.1668	-0.965672	-1.50477	-2.4299	-2.39443	-2.37219	-1.79535	0.945008
1593	19651	AA162520	retinoblastoma-like 2	Rbl2	0.952517	0.980243	0.826665	0.897039	0.867514	1.14023	0.867945	0.978493		-1.88517	-2.458	0.749918	-0.427577	0.289184	-0.19476	0.226327	-2.18018
1594	16000	W10072	insulin-like growth factor 1	Igf1	0.865566	1.10178	0.935503	1.0037	0.67739	0.622678	0.652432	0.856086		0.200131	-0.76005	-1.50477	-2.46153	0.999637	0.999988	0.99992	0.35969
1595	12387	W10023	catenin beta	Catnb	0.820454	1.09621	1.0566	1.0884	0.780773	0.725989	0.844902	0.902753		0.475374	-1.27881	-1.98692	-1.42344	0.807661	0.966645	0.131998	-1.06992
1596		W10680			1.18746	1.01775	0.763404		0.918739		0.921484			-0.264096	-2.24306	-0.281761	-2.46277	-2.45994	NA		NA
1597	14085	W12834	fumarylacetoacetate hydrolase	Fah	1.00361	0.982522	1.04959	1.00399	0.923304	1.05984	1.06989	1.12762		-2.458	-2.32867	-1.56492	-2.458	-0.52248	-1.23714	-0.924171	0.435299
1598	20817	W12836	serine/arginine-rich protein specific kinase 2	Srpk2	1.04688	1.03933	1.00751	1.05368	0.937659	1.00538	0.954663	1.1053		-1.15357	-1.46425	-2.41943	-0.862227	-0.371986	-2.44305	-1.13265	0.61418
1599	14735	W12478	glypican 4	Gpc4	0.963592	1.04872	0.879406	0.836576	0.769926	0.883161	0.864433	0.970641		-1.90261	-1.58478	0.566019	0.927272	0.99839	0.503976	0.749918	-2.08112
1600	13039	AA174215	cathepsin L	Ctsl	0.879157	0.743799	0.773146	0.783249	0.798567	0.636284	0.649543	0.642072		0.455617	0.999323	0.995655	0.992322	0.98228	1	0.999999	1
1601	20677	W14398	SRY-box containing gene 4	Sox4	0.972936	0.981871	0.966294	1.06089	0.956	1.12558	1.17598	1.13855		-1.98692	-2.24306	-1.75829	-0.76005	-1.34107	0.744508	0.968394	0.843104
1602	19024	W12503	protein tyrosine phosphatase, receptor-type, F interacting protein, binding protein 2	Ppfibp2	0.923229	1.48958	1.24766	1.76432	1.04413	1.20591	1.17857	1.11531		-0.639713	0.999998	0.98228	1	-1.77689	0.929075	0.835758	0.131998
1603	17158	W09023	mannosidase 2, alpha 1	Man2a1	1.07491	1.0499	0.808858	0.780687	0.796642	0.860371	0.880823	1.0037		-0.541778	-1.38236	0.993574	0.999064	0.997083	0.878611	0.697611	-2.45571
1604	16782	W09048	laminin, gamma 2	Lamc2	0.909563	1.03058	0.937087	0.977467	0.792728	0.90824	0.803734	0.996678		-1.40293	-2.33801	-1.91986	-2.38734	0.590662	-1.36174	0.239199	-2.46277
1605	13479	W08886	dipeptidase 1 (renal)	Dpep1	0.818986	1.09205	0.879258				1.18495	1.56743		0.9113	-1.13265	-0.862227	-1.02816	0.954146	NA		NA
1606	13091	AI893885	cytochrome P450, family 2, subfamily b, polypeptide 20	Cyp2b20	1.01052	0.65757	0.894144	1.15118	1.45747	1.12164	1.63162	1.07628		-2.45307	0.970057	-1.38236	-0.924171	0.930837	-1.34107	0.993574	-1.95379
1607		W12626			0.776015	1.15738	0.971565		0.933974			0.968416
1608	27055	W13698	FK506 binding protein 9	Fkbp9	1.0742	0.94263	0.942177	0.961671	0.913126	0.878049	0.911537	0.962868		-0.76005	-0.882828	-0.862227	-1.64372	0.173331	0.664848	0.159704	-1.90261
1609	18751	W13213	protein kinase C, beta	Prkcb	0.953105	0.855668	0.865411	0.885418	0.933096	0.894709	0.950908	1.02342		-1.77689	0.629248	0.503976	-0.160905	-1.60453	-0.446339	-1.54496	-2.28825
1610	13429	W13111	dynamin	Dnm	0.968068	0.951142	1.05207	0.898576	0.926315	0.975344	1.01076	1.09422		-2.06598	-1.19538	-1.17448	0.301305	-0.211893	-2.09601	-2.39443	0.173331
1611	17777	W13053	microsomal triglyceride transfer protein	Mttp
1612	15203	W11571	hephaestin	Heph
1613	20648	W34029	syntrophin, acidic 1	Snta1	0.985065	0.984272	1.00799	0.971393	0.897877	0.991255	1.04365	1.03321		-2.40118	-2.39443	-2.44673	-2.24306	-0.40893	-2.44305	-2.00317	-2.18018
1614	12560	W12889	cadherin 3	Cdh3
1615	13628	W11762	eukaryotic translation elongation factor 1 alpha 2	Eef1a2
1616	20597	W14928	sphingomyelin phosphodiesterase 1, acid lysosomal	Smpd1	0.957801	0.998043	1.06396	1.08724	0.887207	0.902488	1.02343	1.00868		-1.38236	-2.46153	-0.60026	0.131998	0.780394	0.557549	-2.11067	-2.41368
1617		W14312			0.995546	0.944264	1.01865	0.930677	0.925447	0.953541	1.06082	1.01626		-2.45571	-1.34107	-2.32867	-0.882828	-0.699533	-1.64372	-1.27881	-2.35574
1618	19141	W14837	legumain	Lgmn	1.02681	0.927427	1.04844	1.16589	1.14074	1.2319	1.11678	1.00101		-2.06598	-0.335522	-1.36174	0.919641	0.794412	0.995095	0.54022	-2.46365
1619	11792	W08299	apurinic/apyrimidinic endonuclease 1	Apex1	0.976641	0.988183	1.31978	1.34082	1.27666	1.12423	1.10665	1.22699		-2.15315	-2.38734	0.999888	0.999957	0.999178	0.606464	0.336779	0.992546
1620	12351	W08694	carbonic anhydrase 4	Car4	1.0924	1.1726	0.899285	1.28991	0.972932	0.98266	1.0207			-2.06598	-1.68243	-2.06598	0.131998	-2.45007	-2.458	-2.44673	NA
1621		AI391213			0.901828	1.01903	1.04247	1.02333	0.99247	0.9769	1.01025	1.10605		0.606464	-2.20616	-1.40293	-2.09601	-2.42484	-2.08112	-2.38734	0.566019
1622	16773	W18311	laminin, alpha 2	Lama2	0.973155	0.981674	0.958895	1.02808	0.9335	0.963883	0.973932	1.12275		-1.62418	-2.05062	-0.80074	-1.60453	0.382015	-1.09083	-1.66313	0.965738
1623	14227	W15971	FK506 binding protein 2	Fkbp2	1.00483	1.00503	0.980706	0.971655	0.844012	0.916406	0.936141	0.901861		-2.43901	-2.43463	-2.05062	-1.62418	0.999123	0.703837	0.173331	0.884247
1624	12833	W16221	procollagen, type VI, alpha 1	Col6a1	0.990286	0.973819	1.03642	0.968864	0.903021	0.865085	0.978441	0.934233		-2.38734	-1.95379	-1.58478	-1.75829	0.643838	0.95649	-2.11067	-0.229161
1625	66467	W36917	DNA segment, Chr 17, Wayne State University 155, expressed	D17Wsu155e	1.07917	0.849182	1.03169	1.10048	1.08183	1.11097	0.885497	0.773673		-1.48455	0.0151516	-2.27739	-1.04903	-1.42344	-0.841676	-0.503285	0.899792
1626	21894	W17813	talin	Tln	0.924969	0.925208	1.02106	1.05224	0.892355	0.911253	1.01564	1.00775		-0.0787164	-0.0948698	-2.18018	-1.09083	0.691278	0.325103	-2.30907	-2.42484
1627	12796	W17771	cathelicidin antimicrobial peptide	Camp	0.969172	1.01946	0.897253	1.02253	0.995822	1.01733	0.982285	0.963336		-2.01921	-2.28825	0.301305	-2.23104	-2.45571	-2.32867	-2.30907	-1.84975
1628	18979	W17967	paraoxonase 1	Pon1	1.25542	1.02395	1.01743	0.979863	0.82317	0.955329	0.905752	0.838737		0.984614	-2.24306	-2.34703	-2.29881	0.940607	-1.72063	-0.127605	0.881459
1629	381234	W36541	similar to G protein-coupled receptor kinase 5	na	0.992873	0.975655	1.13515	1.18119	1.23216	1.33792	1.38226	1.2705		-2.42484	-2.05062	0.856943	0.98228	0.998669	0.999996	1	0.999832
1630	11425	W36685	apolipoprotein C-IV	Apoc4	1.12957	0.8819	1.12304	1.00513	0.940379	0.998616	1.00994	1.01437		0.173331	0.239199	0.0452614	-2.45571	-1.38236	-2.46365	-2.4299	-2.39443
1631	22287	W36838	secretoglobin, family 1A, member 1 (uteroglobin)	Scgb1a1	1.018	0.96152	0.989918	0.917773	1.05561	1.05696	0.934675	1.00997		-2.39443	-2.11067	-2.43901	-1.38236	-1.88517	-1.93693	-1.62418	-2.43901
1632	19042	W18642	protein phosphatase 1A, magnesium dependent, alpha isoform	Ppm1a	1.02243	1.05164	0.848321	0.876658	0.94352	0.947821	0.913997	0.88488		-2.08112	-0.903478	0.989093	0.925428	-0.561176	-0.76005	0.465565	0.878611
1633	20604	W20888	somatostatin	Sst	1.0029	1.07807	0.905336	0.913698	0.911452	0.957058	0.925378	0.952676		-2.45994	-0.335522	0.336779	0.117918	0.186807	-1.48455	-0.246562	-1.32036
1634	14751	W29397	glucose phosphate isomerase 1	Gpi1	0.994144	1.09929	0.969982	1.00989	0.953459	1.04085	0.953109	1.0036		-2.39443	0.964808	-1.06992	-2.27739	-0.000126012	-0.427577	0.0302809	-2.43901
1635	27053	W29492	asparagine synthetase	Asns	0.971867	1.07515	1.20974	1.04713	1.23447	1.14907	1.06024	1.47873		-2.34703	-1.79535	0.186807	-2.18018	0.40376	-0.580671	-2.01921	0.987401
1636	13614	W29554	endothelin 1	Edn1	0.991881	0.506329	0.340745	1.52268	0.261883	0.4111	0.859966	0.431245		-2.46277	0.828117	0.996597	-0.0627071	0.999853	0.974575	-1.97046	0.9598
1637		W29525			0.921296	0.971127	0.752849	0.858928	0.746864	0.804973	0.900653	0.99859		-0.699533	-2.1668	0.997928	0.671623	0.998581	0.964808	-0.0948698	-2.46365
1638	192236	W29855	Hermansky-Pudlak syndrome 1 homolog (human)	Hps1	1.02728	0.871679	0.894988	1.01601	0.989727	0.955302	0.886542	1.04212		-2.05062	0.850162	0.57436	-2.30907	-2.40118	-1.40293	0.697611	-1.56492
1639		AI385616			0.985983	0.989628	0.808776	1.10274	0.935455	1.02539	1.01035	0.997736		-2.32867	-2.39443	0.998115	0.424929	-0.484195	-2.06598	-2.39443	-2.46153
1640	14061	W40725	coagulation factor II	F2	0.999673	0.840296	1.00579	1.00167	0.961124	1.02364	1.00024	0.990991		-2.46418	0.9113	-2.45007	-2.46277	-1.83178	-2.23104	-2.46436	-2.4299
1641	13619	W40777	early development regulator 1 (homolog of polyhomeotic 1)	Edr1	1.09857	0.902489	1.03997	1.00724	1.10634	1.06187	0.759422	0.823597		-0.986474	-0.780363	-2.13924	-2.45307	-0.821179	-1.75829	0.95762	0.650957
1642	14571	W41175	glycerol phosphate dehydrogenase 2, mitochondrial	Gpd2	1.11526	0.760596	0.69875	0.655181	0.657865	0.584819	0.436217	0.542831		0.200131	0.998936	0.999989	1	1	1	1	1
1643	22174	W41438	TYRO3 protein tyrosine kinase 3	Tyro3	1.05479	1.04578	1.11678	1.04907	1.17411	1.15347	0.909737	0.998655		-1.79535	-1.97046	-0.371986	-1.90261	0.485045	0.239199	-0.76005	-2.46365
1644	12683	W41358	cell death-inducing DNA fragmentation factor, alpha subunit-like effector A	Cidea	1.09612	1.02026	1.11901	1.05961	1.11423	1.05273	0.945995	1.00508		0.0893058	-2.24306	0.522365	-1.0073	0.445528	-1.25799	-1.11174	-2.45007
1645	67305	W35981	RIKEN cDNA 3110050F08 gene	3110050F08Rik	0.94192	1.02356	1.01926	1.14016	1.01239	1.03045	0.970974	1.12157		0.0302809	-1.84975	-2.03502	0.987401	-2.27739	-1.50477	-1.52491	0.95762
1646	21853	W34732	timeless homolog (Drosophila)	Timeless	1.0344	1.10605	1.12786	1.09684	1.09425	1.10612	1.21738	1.18881		-1.46425	0.807661	0.937499	0.697611	0.664848	0.807661	0.999757	0.99844
1647		W34802			1.00317	1.0529	1.04688	0.900212	0.869055	0.9614	0.883228	1.01115		-2.45571	-0.739806	-1.0073	0.780394	0.969236	-1.2996	0.921613	-2.35574
1648	14583	W41682	glutamine fructose-6-phosphate transaminase 1	Gfpt1	0.997792	0.991821	1.08511	1.10365	1.10812	1.08269	1.23598	1.09333		-2.45994	-2.4076	0.301305	0.65796	0.71597	0.239199	0.999672	0.485045
1649	20617	W41663	synuclein, alpha	Snca	1.03898	0.999401	0.971684	1.03323	0.89262	1.0645	0.862092	0.852812		-2.03502	-2.46418	-2.21874	-2.15315	-0.111166	-1.44388	0.485045	0.61418
1650	19288	W42321	pentaxin related gene	Ptx3	0.960074	1.01313	1.0155	0.96399	0.948985	0.876653	0.842038	1.00641		-1.48455	-2.37219	-2.36412	-2.00317	-1.48455	0.878611	0.975934	-2.41368
1651	66587	W42367	Fas-activated serine/threonine kinase	Fastk	1.00083	1.01162	0.941461	1.06048	0.913024	0.966872	0.877228	0.894248		-2.46365	-2.37219	-0.699533	-0.76005	0.301305	-1.77689	0.856943	0.678286
1652	15182	W46034	histone deacetylase 2	Hdac2	1.00413	1.11018	1.08418	1.0184	1.02352	0.948239	1.01968	1.03267		-2.43901	0.955332	0.765573	-2.00317	-1.73953	-0.0468426	-1.93693	-1.21627
1653	21938	W45975	tumor necrosis factor receptor superfamily, member 1b	Tnfrsf1b	0.86034	1.20522	1.47154	0.960168	0.986993	1.09071	1.28163	1.26398		0.811911	0.955332	0.999999	-1.77689	-2.38734	-0.264096	0.997578	0.995095
1654		W48168			1.03351	1.11746	1.1514	1.07932	1.19287	1.14509	1.23502	1.38833		-1.66313	0.789826	0.95649	0.117918	0.995095	0.940607	0.999543	1
1655	19730	W48230	ral guanine nucleotide dissociation stimulator	Ralgds	0.885161	1.00011	1.18716	1.11444	1.03791	1.02561	1.14872	1.43073		0.643838	-2.46436	0.952932	0.424929	-1.77689	-2.12508	0.807661	0.999999
1656	11482	W48139	activin A receptor, type II-like 1	Acvrl1	1.04303	1.13258	1.15778	1.03383	0.992325	0.943969	1.04629	1.32435		-2.00317	-0.0155513	0.348308	-2.1668	-2.44673	-1.64372	-1.93693	0.988444
1657	15904	W48116	inhibitor of DNA binding 4	Idb4	0.912971	0.765629	1.17911		1.03627	1.00114	0.945987	1.04898		-2.11067	0.35969	-0.80074	-2.45007	-2.46418	-2.06598	-2.21874	NA
1658	13353	W54234	DiGeorge syndrome critical region gene 6	Dgcr6	0.975052	0.942966	0.900907	1.01595	0.961736	1.07665	1.07294	0.981688		-1.97046	-0.541778	0.703837	-2.26624	-1.42344	0.0151516	-0.0948698	-2.19331
1659	17967	W54389	neural cell adhesion molecule 1	Ncam1	0.926206	1.09649	0.929844	0.877751	0.956641	0.957643	0.87757	1.05208		-0.639713	-0.177764	-0.76005	0.582575	-1.75829	-1.79535	0.455617	-1.60453
1660	17523	W55655	myeloperoxidase	Mpo	0.895991	0.99347	1.01997	0.893778	0.870862	1.0627	0.871026	1.0603		-0.699533	-2.46153	-2.25479	-0.639713	0.239199	-1.56492	-0.0948698	-1.48455
1661	103768	W50677	tubulin, gamma 2	Tubg2	0.963566	0.816399	0.953085	0.917788	0.86466	0.793744	0.772696	0.797466		-1.95379	0.95649	-1.66313	-0.503285	0.664848	0.98627	0.995911	0.983251
1662	14860	W54349	glutathione S-transferase, alpha 4	Gsta4	1.06401	1.14364	1.10511	1.44409	1.74157	1.82325	1.99387	1.44088		-1.77689	-0.264096	-0.965672	0.996034	0.999995	0.999999	1	0.995655
1663	18718	W58969	phosphatidylinositol-4-phosphate 5-kinase, type II, alpha	Pip5k2a	0.914662	0.977548	0.9526	1.01893	0.88748	0.924521	0.953177	1.3186		-0.719632	-2.30907	-1.81365	-2.35574	-0.000126012	-1.0073	-1.81365	0.992092
1664	14276	W59165	folate receptor 2 (fetal)	Folr2	0.870721	0.975295	1.02347	1.10227	0.771098	0.832971	0.896262	1.50284		-0.0627071	-2.32867	-2.34703	-0.924171	0.93256	0.40376	-0.639713	0.999461
1665	16993	W63957	leukotriene A4 hydrolase	Lta4h	1.00273	0.914603	0.983568	0.838179	0.809113	0.844507	0.962479	0.800685		-2.46277	-1.52491	-2.4076	-1.48455	-1.17448	-0.465212	-2.23104	0.40376
1666	13178	W62508	deoxycytidine kinase	Dck	1.01217	0.993641	1.02367	1.00334	0.902277	1.0418	0.967975	1.25722		-2.41368	-2.45007	-2.23104	-2.45994	-0.335522	-2.11067	-2.09601	0.980725
1667	27528	W62819	DNA segment, human D4S114	D0H4S114	0.855723	1.19545	1.17052	1.04433	0.66555	0.578048	0.527196	0.83254		-0.862227	-0.541778	-0.841676	-2.29881	0.934244	0.996034	0.999512	-0.484195
1668	15181	W62765	histone deacetylase 1	Hdac1	0.970955	0.971008	1.20163	1.12644	1.14887	0.990847	0.891476	1.12091		-1.93693	-1.93693	0.989405	0.744508	0.892267	-2.4076	0.691278	0.684837
1669	13852	W64796	epimorphin	Epim	0.963649	1.07514	1.07378	1.01354	0.853688	0.78916	0.949831	1.16303		-2.06598	-1.19538	-1.23714	-2.4076	0.57436	0.960851	-1.75829	0.494579
1670	22200	W62229	ubiquitin-activating enzyme E1C	Ube1c	0.997995	1.03431	1.06445	0.968958	1.0587	1.18095	1.16688	1.17488		-2.46153	-1.79535	-0.699533	-1.88517	-0.903478	0.968394	0.942109	0.884247
1671	15388	W65080	heterogeneous nuclear ribonucleoprotein L	Hnrpl	1.04642	0.849644	0.773036	0.951014	0.831961	0.741294	0.787455	0.813639		-1.93693	0.54895	0.97164	-1.88517	0.733394	0.969236	0.947775	0.780394
1672	11489	W65081	a disintegrin and metalloproteinase domain 12 (meltrin alpha)	Adam12	1.07805	1.14238	1.03309	1.10471	1.06244	0.924665	1.0811	0.97181		-0.862227	0.475374	-2.08112	-0.177764	-1.32036	-0.780363	-0.780363	-2.1668
1673	51800	W65005	Bcl-2-related ovarian killer protein	Bok	1.04207	1.04012	1.12395	1.25081	1.18201	1.35222	1.36165	1.34128		-1.34107	-1.42344	0.824183	0.999757	0.989093	0.999999	1	0.999999
1674	16468	W65025	jumonji	Jmj	1.02986	1.17688	1.0205	1.00019	0.818588	0.811559	0.898269	0.862023		-2.05062	0.904545	-2.26624	-2.46436	0.98228	0.98627	0.313278	0.831975
1675	13395	W65729	distal-less homeobox 5	Dlx5	0.944087	0.981196	1.23747	1.24126	1.08469	1.08347	1.00383	1.14948		-0.144185	-2.06598	0.999983	0.999987	0.606464	0.582575	-2.44673	0.990841
1676	19725	W70909	regulatory factor X, 2 (influences HLA class II expression)	Rfx2
1677	16881	W66626	ligase I, DNA, ATP-dependent	Lig1
1678	15275	W74835	hexokinase 1	Hk1	0.994074	1.0132	1.00284	1.0231	0.90399	1.03735	0.961715	0.998457		-2.35574	-2.45571	-2.46277	-2.46153	-1.19538	-2.32867	-1.11174	-1.58478
1679	53602	W70646	hippocalcin-like 1	Hpcal1
1680	18131	W76913	Notch gene homolog 3 (Drosophila)	Notch3	1.07132	1.13919	1.11147	1.17288	1.03338	1.10552	1.18953	1.16899		-0.541778	0.789826	0.465565	0.942109	-1.86755	0.35969	0.970858	0.93256
1681	14228	W77113	FK506 binding protein 4	Fkbp4	0.968992	1.01194	0.982263	1.16812	1.13572	1.12403	1.15664	1.42417		-1.23714	-2.25479	-2.00317	0.999543	0.993763	0.984614	0.998828	1
1682	18552	W98241	proprotein convertase subtilisin/kexin type 5	Pcsk5	0.942253	0.808107	0.784667	0.86613	0.755275	0.829483	0.909838	0.757305		-1.44388	0.820171	0.981775	0.522365	0.996269	0.866612	-0.446339	0.995785
1683	16682	W98341	keratin complex 2, basic, gene 4	Krt2-4	1.00083	0.958804	1.04281	0.936852	0.938612	1.03052	0.931765	1.08505		-2.46436	-1.91986	-2.01921	-1.42344	-1.42344	-2.1668	-1.15357	-0.719632
1684	17955	W78317	nucleosome assembly protein 1-like 4	Nap1l4	1.02722	1.11689	1.08931	1.07803	1.03221	1.01175	1.04656	1.13688		-1.84975	0.853587	0.503976	0.239199	-1.62418	-2.33801	-0.965672	0.946408
1685	12968	W78478	crystallin, gamma E	Cryge	0.917785	0.924692	0.936748	0.979276	0.913731	1.05548	1.03303	0.928126		-0.619942	-0.841676	-1.23714	-2.31903	-0.659571	-1.56492	-2.18018	-0.965672
1686	26362	W78330	AXL receptor tyrosine kinase	Axl	0.997032	1.02721	1.01265	1.06515	0.803577	0.837353	0.994631	1.576		-2.46153	-2.24306	-2.4299	-1.40293	0.942109	0.785154	-2.45571	0.999998
1687	17918	W80031	myosin Va	Myo5a	0.907263	1.01029	0.870039	0.979512	0.944982	0.884144	1.07584	1.10366		-0.0948698	-2.4299	0.475374	-2.28825	-1.34107	-0.127605	-0.80074	-0.353693
1688	12904	W81912	cellular retinoic acid binding protein II	Crabp2	0.984115	0.94839	1.02128	0.980168	1.1367	0.731429	1.15029	1.63122		-2.23104	-1.15357	-2.12508	-1.79535	-1.75829	0.997653	0.276912	1
1689	13101	W81792	cytochrome P450, family 2, subfamily d, polypeptide 10	Cyp2d10	0.908526	0.962943	1.16338	1.03597	0.995559	1.00135	1.14394	1.06777		-0.561176	-2.05062	0.503976	-2.11067	-2.458	-2.46365	0.264491	-1.38236
1690	50706	W81878	expressed sequence AI747096	AI747096	0.909115	1.09511	1.06261	1.05734	0.773992	0.711035	0.624785	0.944066		-0.882828	-0.986474	-1.7016	-1.79535	0.945008	0.996597	0.999975	-1.75829
1691	17390	W80177	matrix metalloproteinase 2	Mmp2	0.967111	0.979128	1.08727	1.08765	0.985646	0.889288	0.841344	1.00511		-2.12508	-2.40118	-1.0073	-1.23714	-2.41943	-0.446339	0.39296	-2.458
1692		W82873			1.03617	1.16507	1.13599	0.963033	1.14444	0.914235	0.962477	1.14174		-1.48455	0.987034	0.937499	-1.38236	0.9598	0.557549	-1.34107	0.954146
1693	68196	W82182	heat shock factor binding protein 1	Hsbp1	0.989638	1.02471	0.968708	1.03699	0.943721	1.02247	1.15593	1.07497		-2.31903	-1.72063	-1.2996	-1.02816	0.0893058	-1.83178	0.997795	0.54895
1694	14131	W82159	Fc receptor, IgG, low affinity III	Fcgr3	1.0655	1.08964	1.29256	1.16049	1.07589	1.07179	1.29707	1.6123		-0.541778	0.200131	0.999931	0.946408	-0.177764	-0.317475	0.999945	1
1695	12153	W82677	bone morphogenetic protein 1	Bmp1	1.10902	0.976869	1.05454	0.910207	0.872361	0.837379	0.740145	0.739554		-0.317475	-2.29881	-1.68243	-0.561176	0.336779	0.775544	0.997341	0.997423
1696	12959	W82104	crystallin, beta A4	Cryba4	1.09079	1.28133	0.984335	0.726908	0.975099	0.844492	0.833279	0.990867		-0.639713	0.899792	-2.46153	0.973144	-2.36412	0.0302809	0.301305	-2.46277
1697	16006	W83086	insulin-like growth factor binding protein 1	Igfbp1	1.84649	3.09133	1.0876	4.42037	0.474361	0.896996	2.4209	0.706735		0.54895	0.993763	-2.32867	0.999863	0.820171	-2.24306	0.940607	-0.780363
1698	54405	W83104	NADH dehydrogenase (ubiquinone) 1 alpha subcomplex, 1	Ndufa1	1.1095	1.08114	1.02687	1.01864	1.03887	0.997825	1.09351	0.989367		0.775544	0.289184	-1.86755	-2.1668	-1.36174	-2.37219	0.557549	-2.35574
1699	22084	W82751	tuberous sclerosis 2	Tsc2	0.962305	1.06578	1.07021	0.97472	1.03735	1.05002	1.03973	1.12223		-1.42344	-0.317475	-0.160905	-1.95379	-1.50477	-0.739806	-1.40293	0.843104
1700	109979	W82798	ADP-ribosyltransferase 3	Art3	0.954185	0.93372	1.02871	0.932844	0.869398	0.83443	1.04075	1.32616		-1.62418	-1.13265	-2.34703	-1.38236	0.213305	0.860232	-1.79535	0.986657
1701	12257	W82946	benzodiazepine receptor, peripheral	Bzrp	1.05202	1.00478	0.97163	0.990518	0.823447	0.869516	0.930265	1.04072		-1.25799	-2.45007	-2.01921	-2.41368	0.988105	0.843104	-0.465212	-1.64372
1702	21406	W83524	transcription factor 12	Tcf12	1.01234	1.01715	1.02648	1.11251	1.09322	0.986285	1.1123	1.15481		-2.39443	-2.32867	-2.1668	0.213305	-0.229161	-2.37993	0.264491	0.749918
1703	17768	W84014	methylenetetrahydrofolate dehydrogenase (NAD+ dependent), methenyltetrahydrofolate cyclohydrolase	Mthfd2	0.984629	1.00317	1.23332	1.05469	1.04475	0.992515	1.06633	1.21247		-2.31903	-2.45007	0.945008	-1.60453	-2.00317	-2.44305	-1.50477	0.828117
1704	12819	W83331	procollagen, type XV	Col15a1	1.02423	1.01198	1.24716	1.13201	1.23248	1.10894	1.04496	1.13229		-2.12508	-2.37993	0.998173	0.749918	0.996382	0.465565	-1.44388	0.755231
1705	384972	W83609	similar to Retinol-binding protein I, cellular (Cellular retinol-binding protein) (CRBP)	na	1.03596	1.04102	0.801576	0.891647	0.742586	0.703674	0.498815	1.10958		-2.23104	-2.1668	0.733394	-0.699533	0.960851	0.991856	1	-0.924171
1706	12952	W83558	cryptochrome 1 (photolyase-like)	Cry1	1.0433	0.986706	1.0456	1.01294	0.790007	0.724679	1.03227	0.710094		-1.58478	-2.36412	-1.50477	-2.37219	0.998489	0.999992	-1.93693	0.999998
1707	13481	W83728	dolichol-phosphate (beta-D) mannosyltransferase 2	Dpm2	0.89793	0.971549	1.0453	1.11146	1.09227	0.998433	1.02524	1.14158		0.684837	-1.88517	-1.27881	0.65796	0.325103	-2.46277	-2.03502	0.899792
1708	12876	W83974	carboxypeptidase E	Cpe	0.960844	1.03659	1.08853	0.922491	0.924126	0.929848	0.927752	1.04927		-2.05062	-2.12508	-0.965672	-1.06992	-1.11174	-1.27881	-1.21627	-1.88517
1709	16391	W84302	interferon dependent positive acting transcription factor 3 gamma	Isgf3g	0.890033	0.896324	0.806865	0.83672	0.728482	0.780651	0.873848	0.947822		0.0893058	-0.0627071	0.951688	0.831975	0.999323	0.986657	0.414416	-1.60453
1710	13136	W83988	decay accelerating factor 1	Daf1	0.868923	1.07438	1.06855	1.01814	0.929977	0.885619	1.04003	1.11543		0.39296	-1.17448	-1.32036	-2.36412	-1.15357	0.0600927	-2.01921	-0.19476
1711	20533	W85633	solute carrier family 4 (anion exchanger), member 1	Slc4a1	0.631705	1.03621	0.840772	1.25456	1.01335	1.04525	0.772083	0.846231		0.997172	-2.27739	0.0452614	0.606464	-2.45007	-2.24306	0.785154	-0.177764
1712	12767	W88094	chemokine (C-X-C motif) receptor 4	Cxcr4	1.02955	0.960837	0.984062	1.11569	0.97591	0.910575	0.957149	1.07525		-2.12508	-2.05062	-2.37993	0.117918	-2.27739	-0.246562	-1.60453	-0.821179
1713	19653	W88130	RNA binding motif protein 4	Rbm4	0.905913	1.53581	1.19766	1.14008	1.19645	0.947818	0.921353	1.27256		0.348308	1	0.980179	0.803328	0.979043	-1.09083	-0.0948698	0.999366
1714		W87045			0.980491	0.929844	1.02502	0.931222	1.12466	0.939007	0.987968	1.14035		-2.31903	-0.903478	-2.23104	-0.965672	0.239199	-1.21627	-2.4076	0.475374
1715	12905	W85081	CASP2 and RIPK1 domain containing adaptor with death domain	Cradd	0.952467	0.967579	1.08722	1.07014	1.20291	1.03411	0.929357	1.03125		-1.0073	-1.7016	0.276912	-0.229161	0.996491	-1.68243	-0.0311237	-1.77689
1716	225884	W87197	cDNA sequence BC021614	BC021614	0.969109	1.02722	1.28978	1.34305	1.56951	1.58107	1.04681	1.12326		-2.28825	-2.33801	0.835758	0.937499	0.999323	0.999479	-2.12508	-0.780363
1717	22059	W87149	transformation related protein 53	Trp53	0.895791	1.08927	1.26487	1.22197	1.10718	0.962118	1.14976	1.20365		0.485045	0.186807	0.999693	0.975263	0.465565	-2.30907	0.794412	0.988773
1718	18815	W99028	plasminogen	Plg	0.980373	1.06643	0.884412	0.986498	0.528606	0.726408	0.970808	0.967563		-2.42484	-2.08112	-1.25799	-2.44673	0.999748	0.780394	-2.37993	-2.35574
1719	15437	W99235	homeo box D8	Hoxd8	1.02307	0.974908	0.936637	0.811825	0.98169	0.967477	0.971394	0.954996		-2.25479	-2.26624	-1.17448	0.94911	-2.34703	-2.25479	-2.13924	-1.77689
1720	21804	W99117	transforming growth factor beta 1 induced transcript 1	Tgfb1i1	0.926168	1.09991	1.04104	1.02682	1.01115	1.0798	1.02344	1.00645		-0.317475	0.200131	-1.64372	-2.08112	-2.39443	-0.317475	-2.1668	-2.43901
1721	16948	W96914	lysyl oxidase	Lox	1.05036	1.19536	0.988322	1.00998	1.07291	0.968656	1.00991	1.26103		-1.72063	0.824183	-2.41943	-2.4299	-1.25799	-2.21874	-2.4299	0.973144
1722	19365	W88003	RAD52 homolog (S. cerevisiae)	Rad52	1.04394	1.02644	0.980524	0.974852	0.926234	0.914018	0.911566	0.938257		-0.862227	-1.75829	-2.03502	-1.77689	0.494579	0.664848	0.780394	0.0893058
1723	16011	W89253	insulin-like growth factor binding protein 5	Igfbp5	0.945559	1.07723	1.01309	0.878736	0.833572	0.850321	0.915574	0.955363		-1.54496	-1.02816	-2.4076	0.289184	0.835758	0.703837	-0.639713	-1.83178
1724	16211	W87958	karyopherin (importin) beta 1	Kpnb1	1.00759	1.01767	1.09392	1.09817	0.954259	0.889176	1.02254	0.948061		-2.4299	-2.27739	0.159704	0.25192	-1.34107	0.678286	-2.1668	-1.09083
1725	18541	W89405	pericentrin 2	Pcnt2	0.945866	0.975967	1.24967	1.08911	1.15558	1.24376	1.17677	1.2376		-1.23714	-2.18018	0.99338	-0.246562	0.794412	0.991613	0.897337	0.989405
1726		AI429619			0.969102	1.00477	1.02379	0.961121	1.03324	1.01104	0.904069	1.09588		-2.21874	-2.458	-2.31903	-2.06598	-2.19331	-2.43463	-0.619942	-0.841676
1727		W87981			1.08293	1.23437	1.11214	0.910866	1.08282	1.0657	1.13547	1.16608		-0.160905	0.996034	0.485045	0.213305	-0.177764	-0.719632	0.760449	0.875704
1728	18073	W88036	nidogen 1	Nid1	1.06034	1.04365	0.998277	0.976617	1.03423	1.01936	1.13462	1.24549		-0.699533	-1.36174	-2.46277	-2.08112	-1.73953	-2.20616	0.850162	0.999301
1729	17685	W91178	mutS homolog 2 (E. coli)	Msh2	0.948564	0.867113	0.881717	0.898178	0.788193	0.886334	0.943323	1.03208		-0.40893	0.991106	0.970858	0.899792	0.999997	0.95762	-0.144185	-1.50477
1730	14082	W91183	Fas (TNFRSF6)-associated via death domain	Fadd	0.904933	0.90343	0.982775	0.884587	0.904541	0.896845	0.977727	0.997869		0.820171	0.839467	-2.15315	0.955332	0.828117	0.894829	-1.95379	-2.45994
1731	17285	W89502	mesenchyme homeobox 1	Meox1	0.959638	0.986466	0.943417	0.766043	0.660716	0.702689	0.868625	0.822826		-1.97046	-2.4076	-1.56492	0.988444	0.99998	0.999682	0.382015	0.860232
1732	13830	W89549	erythrocyte protein band 7.2	Epb7.2	0.987126	1.0594	1.04762	1.20864	0.911233	0.973622	1.26167	1.29539		-2.36412	-0.965672	-1.40293	0.985872	0.173331	-2.06598	0.998669	0.999722
1733	12988	W89819	c-src tyrosine kinase	Csk	1.08419	0.993908	1.06463	1.08822	0.936736	1.02058	1.06339	1.09188		-0.000126012	-2.43901	-0.619942	0.103687	-0.52248	-2.19331	-0.679512	0.200131
1734	208836	W89816	cDNA sequence BC025462	BC025462	0.896881	0.924237	0.953304	0.938418	0.857633	0.921394	1.00038	1.1221		0.794412	0.239199	-0.965672	-0.281761	0.983251	0.325103	-2.46418	0.850162
1735	13865	W90859	nuclear receptor subfamily 2, group F, member 1	Nr2f1	0.957917	0.978077	0.920723	0.962056	0.952474	0.903804	1.0442	0.958769		-1.81365	-2.28825	-0.659571	-1.93693	-1.68243	-0.160905	-1.83178	-2.01921
1736	19089	W91045	protein kinase C substrate 80K-H	Prkcsh	0.88505	0.971053	0.955518	1.06738	0.879959	1.00648	1.16666	1.12196		0.919641	-1.73953	-0.986474	-0.111166	0.942109	-2.42484	0.989093	0.881459
1737	14854	W91402	glutathione synthetase	Gss	1.08304	1.21056	1.07988	1.23592	1.17194	1.18019	1.31962	1.35672		-0.903478	0.863455	-0.986474	0.930837	0.643838	0.709956	0.994299	0.998173
1738	12527	W98963	CD9 antigen	Cd9	0.947214	0.960122	0.940733	1.16492	0.965905	0.921339	0.821548	0.750042		-1.19538	-1.68243	-0.944903	0.884247	-1.86755	-0.229161	0.984614	0.999902
1739	11803	W98956	amyloid beta (A4) precursor-like protein 1	Aplp1	0.953566	0.890863	1.00408	0.956641	0.883095	0.92239	0.98821	1.04583		-1.64372	0.276912	-2.458	-1.73953	0.424929	-0.60026	-2.4076	-1.72063
1740	20190	W97384	ryanodine receptor 1, skeletal muscle	Ryr1	0.871964	1.00916	0.862098	0.800132	1.09535	0.886769	1.09458	0.981608		0.590662	-2.42484	0.709956	0.982772	-0.679512	0.226327	-0.60026	-2.36412
1741	22694	W97363	zinc finger protein 35	Zfp35	0.959662	1.0424	1.08232	0.979046	1.08479	1.06739	1.1854	1.07397		-1.66313	-1.7016	-0.465212	-2.23104	-0.281761	-0.821179	0.943575	-0.60026
1742	18128	W98998	Notch gene homolog 1 (Drosophila)	Notch1	1.89389	3.32414	2.18933	2.3962	1.73826	2.79778	3.1104	2.88881		1	1	1	1	0.999998	1	1	1
1743	97977	W97442	expressed sequence C81508	C81508	0.989944	0.91125	0.972014	0.924328	0.924982	1.13135	0.930482	0.979312		-2.39443	0.35969	-1.93693	-0.0155513	-0.0468426	0.811911	-0.229161	-2.1668
1744	27632	W97403	RD RNA-binding protein	Rdbp	0.930619	1.03799	0.921748	0.944693	0.945713	0.941502	1.04653	1.07905		-0.177764	-1.68243	-0.0311237	-0.903478	-0.944903	-0.619942	-1.38236	-0.211893
1745	15417	W97853	homeo box B9	Hoxb9	0.864433	1.03084	0.901946	0.949734	0.794657	0.977059	0.953457	0.970724		0.691278	-2.37993	0.0893058	-1.25799	0.984171	-2.25479	-1.38236	-2.45994
1746	330260	W98586	paraoxonase 2	Pon2	0.966983	1.04835	0.982978	0.908608	0.88791	0.981422	0.953393	0.994131		-1.25799	-0.503285	-2.09601	0.872736	0.974575	-2.03502	-0.465212	-2.41943
1747		AI429818			1.02761	0.959405	0.830365	0.889242	0.735713	0.987465	1.02531	0.872518		-2.20616	-1.88517	0.88965	0.173331	0.999278	-2.43463	-2.24306	0.485045
1748	12015	W98547	Bcl-associated death promoter	Bad	0.976683	0.885808	0.888516	0.859833	0.980144	0.789957	1.05289	0.882493		-1.86755	0.963855	0.93589	0.995911	-2.01921	0.999997	-0.427577	0.97164
1749	18971	W91387	polymerase (DNA directed), delta 1, catalytic subunit	Pold1	1.07104	1.03894	1.07757	1.06991	1.10013	1.07985	1.31883	1.18994		-0.76005	-1.79535	-0.561176	-0.80074	0.0452614	-0.484195	0.999661	0.940607
1750	11757	W91307	peroxiredoxin 3	Prdx3	0.987671	1.09129	0.994342	1.05981	0.98487	1.07175	1.08424	1.16459		-2.32867	0.475374	-2.43463	-0.484195	-2.26624	-0.0311237	0.325103	0.983717
1751		W98230			0.932514	1.00501	1.07271	0.956827	0.856827	0.888266	1.09787	1.05359		0.0302809	-2.44305	0.0452614	-1.06992	0.988105	0.894829	0.629248	-0.699533
1752	12444	W98440	cyclin D2	Ccnd2	0.885544	1.12736	1.06921	1.07011	0.864419	0.837884	0.854929	1.09391		0.0747743	0.226327	-1.15357	-1.13265	0.606464	0.789826	0.71597	-0.484195
1753	18761	W98195	protein kinase C, theta	Prkcq	1.08714	0.885998	0.903045	0.999189	0.802806	0.83721	0.893822	0.904581		-0.619942	0.264491	-0.127605	-2.45007	0.973144	0.869706	0.103687	-0.160905
1754	12831	W99856	procollagen, type V, alpha 1	Col5a1	0.983615	0.997448	1.04357	0.865392	0.844431	0.987952	1.14573	1.16427		-2.35574	-2.46153	-1.79535	0.664848	0.850162	-2.4076	0.566019	0.733394
1755	13667	AA000219	eukaryotic translation initiation factor 2B, subunit 4 delta	Eif2b4	1.00143	1.01167	1.23055	1.16946	0.962774	0.796863	1.00212	1.0037		-2.46365	-2.42484	0.904545	0.582575	-2.05062	0.950414	-2.46277	-2.45994
1756	230654	AA000163	RIKEN cDNA D630045E04 gene	D630045E04Rik	0.92134	0.955523	1.06446	1.1161	0.883731	0.863356	0.993439	1.01907		0.0747743	-1.2996	-0.60026	0.65796	0.811911	0.937499	-2.43463	-2.21874
1757	14533	AA000036	GCN5 general control of amino acid synthesis-like 1 (yeast)	Gcn5l1	1.00569	0.954291	0.836868	0.951797	0.921708	0.919305	1.03632	1.06348		-2.42484	-0.619942	0.999682	-0.484195	0.636602	0.684837	-1.21627	0.0600927
1758	20020	AA000244	polymerase (RNA) II (DNA directed) polypeptide A	Polr2a	0.954203	1.17104	0.979474	1.02722	0.844325	0.867086	0.95967	1.00119		-0.965672	0.988773	-2.09601	-1.88517	0.99479	0.970858	-1.23714	-2.46277
1759	22416	AA000971	wingless-related MMTV integration site 3A	Wnt3a	1.03072	0.987758	0.995687	1.08893	1.03359	1.0668	1.0901	0.977576		-1.90261	-2.36412	-2.45307	0.117918	-1.81365	-0.561176	0.145927	-2.13924
1760	14281	AA002910	FBJ osteosarcoma oncogene	Fos	1.13062	0.970726	0.979856	0.738702	0.869282	0.826248	1.18935	1.43737		-0.619942	-2.23104	-2.39443	0.954146	-0.281761	0.173331	0.226327	0.991613
1761	13360	AA003001	7-dehydrocholesterol reductase	Dhcr7	0.865656	1.06733	0.786313	0.643943	0.732905	0.946513	0.728786	0.87908		-0.19476	-1.77689	0.803328	0.999345	0.965738	-1.95379	0.970858	-0.465212
1762	66963	AA002376	RIKEN cDNA 2310061N19 gene	2310061N19Rik	1.01351	1.18183	0.854397	0.934707	0.846524	0.931293	0.951956	0.949154		-2.37219	0.934244	0.899792	-0.739806	0.93256	-0.60026	-1.40293	-1.27881
1763	11747	AA002439	annexin A5	Anxa5	0.953847	0.967883	0.916747	1.07896	0.942192	0.955277	1.01692	1.09311		-1.15357	-1.75829	0.289184	-0.0155513	-0.619942	-1.21627	-2.25479	0.348308
1764	14049	AA002292	eyes absent 2 homolog (Drosophila)	Eya2	0.999343	1.03009	0.888504	0.916279	0.920926	0.950761	0.928121	0.79745		-2.46418	-2.28825	0.145927	-0.60026	-0.739806	-1.66313	-0.965672	0.939071
1765	17865	AA003042	myeloblastosis oncogene-like 2	Mybl2	0.940066	0.992399	1.04385	0.872596	0.917013	0.916651	1.18708	1.05326		-1.32036	-2.44305	-1.84975	0.485045	-0.580671	-0.561176	0.820171	-1.60453
1766	12035	AA003372	branched chain aminotransferase 1, cytosolic	Bcat1	0.800336	1.1242	0.80881	0.898439	1.13759	1.05383	1.24977	1.27408		-0.000126012	-1.95379	-0.699533	-1.93693	-1.83178	-2.46153	-0.246562	-0.0627071
1767	19342	AA003262	RAB4B, member RAS oncogene family	Rab4b
1768	21828	AA003452	thrombospondin 4	Thbs4	0.907267	0.92222	0.979314	1.00374	0.801888	1.07574	0.933963	1.12902		-0.924171	-1.72063	-2.45007	-2.43463	-0.0311237	-2.09601	-1.58478	-0.40893
1769	22601	AA002763	yes-associated protein	Yap	0.888768	1.18811	1.15699	1.08405	0.903371	0.907869	1.13735	1.2367		0.173331	0.820171	0.598625	-0.76005	-0.19476	-0.317475	0.35969	0.95649
1770	12140	AA002514	fatty acid binding protein 7, brain	Fabp7	0.954227	0.786726	0.826987	0.947541	0.743803	1.01123	0.916398	1.22279		-2.01921	0.839467	0.513238	-1.97046	0.977848	-2.43463	-1.13265	0.703837
1771	17524	AA003740	membrane protein, palmitoylated	Mpp1	1.00781	1.09864	0.784068	0.92712	0.863585	0.884825	0.919349	1.12224		-2.42484	0.301305	0.999649	-0.211893	0.917624	0.755231	0.0452614	0.678286
1772	19255	AA003599	protein tyrosine phosphatase, non-receptor type 2	Ptpn2	1.02593	0.897273	0.930818	0.935111	0.979548	0.889377	0.875177	1.07059		-2.08112	0.531359	-0.60026	-0.580671	-2.21874	0.65796	0.820171	-0.541778
1773	56258	AA003549	heterogeneous nuclear ribonucleoprotein H2	Hnrph2	0.945019	1.04896	1.06658	0.986157	0.97833	0.882138	0.949366	1.03556		-0.739806	-1.11174	-0.427577	-2.31903	-2.12508	0.860232	-0.944903	-1.66313
1774	97532	AA007791	RIKEN cDNA C230084J24 gene	C230084J24Rik	1.04699	1.09614	0.939482	0.939259	0.904902	0.953574	0.973826	0.910209		-1.79535	-0.484195	-1.64372	-1.34107	-0.281761	-1.75829	-2.34703	-0.780363
1775	16818	AA008016	lymphocyte protein tyrosine kinase	Lck	0.948882	1.05982	1.06018	0.996908	0.893646	0.880749	0.896857	1.07962		-0.503285	-0.246562	-0.229161	-2.45307	0.909097	0.963855	0.886977	0.40376
1776	18214	AA008069	discoidin domain receptor family, member 2	Ddr2	0.946205	1.01452	1.07663	0.954651	0.862346	0.835091	1.05004	1.1453		-1.68243	-2.40118	-1.19538	-1.88517	0.424929	0.744508	-1.83178	0.239199
1777	15896	AA050972	intercellular adhesion molecule 2	Icam2	1.04174	1.02051	1.07892	1.25283	1.0491	1.13349	1.15719	1.12164		-1.38236	-2.15315	0.0302809	0.999748	-1.06992	0.878611	0.958723	0.794412
1778	19336	AA051083	RAB24, member RAS oncogene family	Rab24	0.985978	0.92482	0.958714	0.981923	0.931077	0.922501	1.00834	1.05649		-2.20616	0.621774	-0.780363	-2.05062	0.465565	0.671623	-2.37219	-0.127605
1779		AA051014			0.954354	0.935874	0.937866	0.722459	0.740089	0.84038	0.958154	0.759776		-1.40293	-0.679512	-0.944903	0.999995	0.999977	0.966645	-1.54496	0.99988
1780	22241	AA007768	Unc-51 like kinase 1 (C. elegans)	Ulk1	0.739991	0.78119	0.686259	0.720887	0.605555	0.738183	0.558661	0.811972		0.94911	0.811911	0.993763	0.974575	0.999884	0.951688	0.999993	0.57436
1781	12461	AA003927	chaperonin subunit 2 (beta)	Cct2	1.07461	1.02363	1.11826	1.20628	1.0733	1.06617	1.15106	1.10213		-0.446339	-2.15315	0.557549	0.984171	-0.484195	-0.739806	0.856943	0.276912
1782	20187	AA004183	receptor-like tyrosine kinase	Ryk	0.964966	0.976875	0.955673	0.889605	0.888391	0.89483	0.925729	0.98497		-1.88517	-2.23104	-1.68243	0.475374	0.494579	0.370926	-0.503285	-2.35574
1783	18515	AA003969	pre B-cell leukemia transcription factor 2	Pbx2	1.02801	0.790156	0.876062	0.8876	0.873279	0.887467	0.943244	0.927383		-1.95379	0.999757	0.886977	0.789826	0.902194	0.794412	-0.719632	-0.0787164
1784	11656	AA003951	aminolevulinic acid synthase 2, erythroid	Alas2	0.913483	0.929142	0.872209	0.981567	0.916235	1.04983	0.753653	0.927913		-0.841676	-1.27881	0.159704	-2.37219	-0.924171	-1.88517	0.986657	-1.25799
1785	19411	AA014382	retinoic acid receptor, gamma	Rarg	0.914475	0.980023	0.939298	1.02501	0.793802	0.939442	0.997583	1.08265		-0.40893	-2.30907	-1.21627	-2.23104	0.985045	-1.23714	-2.46153	-0.699533
1786	12388	AA008582	catenin src	Catns	0.87586	0.89551	0.968625	0.969644	0.887111	0.948578	0.97122	1.09471		0.927272	0.775544	-1.72063	-1.77689	0.856943	-0.80074	-1.83178	0.465565
1787	18974	AA008627	polymerase (DNA directed), epsilon 2 (p59 subunit)	Pole2	0.908731	1.07304	0.866612	1.21039	0.888073	0.921231	1.00115	0.929889		-0.465212	-1.40293	-0.177764	0.780394	-0.246562	-1.50477	-2.45307	-1.32036
1788	21645	AI466661	t-complex-associated testis expressed 1	Tcte1	0.825853	1.05696	0.990201	0.868436			0.862427	0.788869		0.301305	-1.81365	-2.33801	-1.17448	-0.317475	-1.04903		NA
1789	14645	AA011759	glutamate-ammonia ligase (glutamine synthase)	Glul	0.93916	1.05197	0.978779	0.947936	0.711062	0.815561	0.743125	0.721916		-1.58478	-1.84975	-2.34703	-1.79535	0.998115	0.820171	0.99057	0.9967
1790	23872	AA014761	E26 avian leukemia oncogene 2, 3' domain	Ets2	0.89048	1.02442	1.03584	0.891944	0.933357	0.867186	1.05926	1.05209		0.945008	-1.84975	-1.2996	0.939071	0.264491	0.991613	-0.177764	-0.484195
1791	55948	AA009229	stratifin	Sfn	0.882394	0.943897	0.967188	0.80472	0.842742	0.964111	1.00117	0.948628		0.61418	-1.02816	-1.93693	0.992322	0.934244	-1.84975	-2.46365	-1.32036
1792	17869	AA009268	myelocytomatosis oncogene	Myc	1.20628	2.60184	1.48631	3.69033	1.96271	2.03433	1.44858	3.2136		-0.699533	0.999997	0.831975	1	0.99879	0.999425	0.760449	1
1793	17216	AA011839	minichromosome maintenance deficient 2 mitotin (S. cerevisiae)	Mcm2	0.833399	0.984979	0.996606	0.957445	0.746209	0.966153	0.945633	0.965377		0.892267	-2.37993	-2.45994	-1.81365	0.998969	-2.03502	-1.44388	-2.01921
1794	20897	AA015434	stimulated by retinoic acid gene 6	Stra6	0.892853	1.0923	1.02023	1.0034	0.959939	0.892944	1.04609	0.940117		0.239199	-1.34107	-2.15315	-2.46153	-2.28825	-0.659571	-2.06598	-1.64372
1795	18762	AA014771	protein kinase C, zeta	Prkcz	0.855325	0.769625	0.818844	0.849569	0.700537	0.82071	0.851187	0.813446		0.40376	0.943575	0.709956	0.485045	0.997258	0.697611	0.325103	0.828117
1796	14661	AA014196	glutamate dehydrogenase	Glud	0.881609	0.872396	0.987889	0.86785	0.872951	0.788439	0.842876	0.744669		-0.229161	-0.0311237	-2.44305	0.0600927	-0.0311237	0.899792	0.475374	0.981775
1797	15526	AA014915	heat shock protein, A	Hspa9a	0.922771	1.16961	1.09308	1.16201	1.09004	1.0433	1.21599	1.25788		-0.465212	0.846668	-0.211893	0.803328	-0.299554	-1.72063	0.968394	0.993574
1798		AA014136			0.998497	1.13458	1.13175	1.052	1.06737	1.31725	1.14628	1.01876		-2.46365	0.145927	0.103687	-1.64372	-1.21627	0.996991	0.485045	-2.33801
1799		AA014945			0.963864	1.00525	0.973089	0.939483	0.65193	0.686951	0.942623	1.02201		-2.11067	-2.458	-2.26624	-1.56492	0.99996	0.999637	-1.64372	-2.33801
1800	17896	AA014929	myosin, light polypeptide 4, alkali; atrial, embryonic	Myl4	0.959353	1.18826	0.9316	0.937646	0.846956	0.918613	0.995055	0.976698		-1.81365	0.878611	-0.821179	-1.11174	0.850162	-0.427577	-2.4076	-2.24306
1801	17702	AA016730	homeo box, msh-like 2	Msx2	0.969023	0.914717	1.0495	1.04156	0.876755	0.959162	1.16475	1.0524		-2.13924	-0.580671	-1.73953	-1.93693	0.35969	-1.90261	0.494579	-1.66313
1802	11804	AA016732	amyloid beta (A4) precursor-like protein 2	Aplp2	0.865997	1.11108	0.981656	0.958922	0.786331	0.869762	1.16355	1.03718		0.25192	-0.503285	-2.37219	-2.03502	0.940607	0.186807	0.370926	-2.12508
1803	19173	AA016883	proteasome (prosome, macropain) subunit, beta type 5	Psmb5	1.05465	0.992987	1.06699	1.23875	1.14248	1.23695	1.29231	1.32309		-0.80074	-2.42484	-0.229161	0.999558	0.927272	0.999512	0.99998	0.999997
1804	19290	AA017896	purine rich element binding protein A	Pura	0.952951	1.04564	0.974021	0.917164	0.924759	0.924239	0.985889	1.09369		-1.2996	-1.42344	-2.06598	0.0600927	-0.19476	-0.177764	-2.33801	0.145927
1805	75008	AA017881			1.0594	0.971645	0.938928	0.918848	0.938822	0.857166	1.0448	1.04454		-0.699533	-1.88517	-0.484195	0.239199	-0.465212	0.969236	-1.27881	-1.2996
1806	22271	AA020155	uridine phosphorylase 1	Upp1	0.955899	1.01074	0.98536	0.902683	0.958395	0.928246	0.994145	0.898697		-1.42344	-2.39443	-2.32867	0.435299	-1.50477	-0.317475	-2.44305	0.513238
1807	19352	AA020526	RAB geranylgeranyl transferase, b subunit	Rabggtb	1.05005	0.888977	0.865942	1.05038	1.03993	0.971098	1.29608	1.03558		-1.25799	0.684837	0.897337	-1.23714	-1.62418	-1.97046	0.999843	-1.77689
1808	232932	AI508261	similar to pregnancy-specific glycoprotein 23	na	0.911573	0.967295	0.847488	0.941823	0.87358	1.04719	0.951606	1.08503		0.226327	-1.83178	0.962878	-0.821179	0.846668	-1.36174	-1.23714	-0.0627071
1809	16453	AA023670	Janus kinase 3	Jak3	0.996136	0.981766	1.01879	1.03497	1.01165	0.896322	0.965251	0.842295		-2.45994	-2.42484	-2.34703	-2.08112	-2.44673	-0.427577	-2.18018	0.173331
1810		AA022290			0.927823	0.985001	0.928927	0.962372	0.820017	1.01141	1.10198	1.06537		-0.944903	-2.38734	-0.986474	-1.97046	0.919641	-2.41943	-0.335522	-1.2996
1811	18132	AA022302	Notch gene homolog 4 (Drosophila)	Notch4	1.0031	0.920649	0.903214	0.952691	0.908229	1.01177	1.02244	1.05259		-2.46153	-0.719632	-0.177764	-1.7016	-0.317475	-2.41368	-2.28825	-1.62418
1812	13430	AA021681	dynamin 2	Dnm2	1.01308	1.04809	0.984498	1.06624	0.841201	0.814507	0.871272	1.04251		-2.32867	-1.04903	-2.00317	-0.299554	0.994125	0.999345	0.94911	-0.965672
1813	20922	AA021916	suppressor of Ty 4 homolog (S. cerevisiae)	Supt4h	0.932753	0.975614	1.02634	1.09466	0.962023	0.992965	1.04938	1.12937		0.54895	-1.66313	-1.58478	0.875704	-0.821179	-2.38734	-0.281761	0.989093
1814	14884	AA024318	general transcription factor II H, polypeptide 1	Gtf2h1	0.973884	1.07244	0.981265	0.996435	0.977219	0.839887	0.898121	1.07877		-1.90261	-0.0468426	-2.1668	-2.45307	-2.03502	0.995785	0.780394	0.145927
1815	12916	AA030254	cAMP responsive element modulator	Crem	0.99763	0.964103	1.0834	1.19528	1.06421	1.11495	1.01863	0.987733		-2.46153	-1.90261	-0.503285	0.929075	-1.09083	0.239199	-2.30907	-2.39443
1816	12464	AA027583	chaperonin subunit 4 (delta)	Cct4	1.04412	1.03553	0.985155	0.95104	0.92689	0.955234	0.890316	0.989484		-1.77689	-1.98692	-2.37219	-1.56492	-0.739806	-1.7016	0.276912	-2.41943
1817	11821	AA030540	adenine phosphoribosyl transferase	Aprt	1.0064	1.09414	1.29227	1.51784	1.37126	1.44136	1.31446	1.26396		-2.4299	0.494579	0.999988	1	1	1	0.999997	0.999935
1818	15492	AA028760	hydroxysteroid dehydrogenase-1, delta<5>-3-beta	Hsd3b1	0.993838	1.00564	0.969085	1.30918	0.752525	0.770646	0.682394	0.7823		-2.45571	-2.45571	-2.21874	0.973144	0.983717	0.963855	0.999572	0.942109
1819	381596	AA027522	LOC381596	na	0.955059	1.02636	0.920935	0.813948	0.800179	0.969727	0.943639	0.94281		-1.83178	-2.24306	-0.821179	0.921613	0.95762	-2.1668	-1.50477	-1.48455
1820	17256	AA028786	male enhanced antigen 1	Mea1	1.1253	0.697744	1.15705	1.05927	1.04612	1.3241	0.899069	0.675374		-0.986474	0.970057	-0.541778	-2.03502	-2.19331	0.828117	-1.19538	0.986657
1821	12960	AA028309	crystallin, beta B1	Crybb1	0.970444	0.994612	0.915841	0.943067	0.794487	0.878014	0.899028	0.949815		-2.11067	-2.45307	-0.40893	-1.2996	0.987401	0.503976	0.0747743	-1.52491
1822		AA028475			0.949589	1.02286	0.92012	0.9535	0.864882	0.924847	0.940929	0.911332		-1.36174	-2.21874	-0.317475	-1.50477	0.798912	-0.465212	-1.04903	-0.0468426
1823	15360	AA030116	3-hydroxy-3-methylglutaryl-Coenzyme A synthase 2	Hmgcs2	0.999672	1.00147	0.981731	0.967245	0.870275	0.870669	0.997694	0.900969		-2.46418	-2.46277	-2.23104	-1.75829	0.915562	0.913454	-2.45994	0.598625
1824	20598	AA028477	sphingomyelin phosphodiesterase 2, neutral	Smpd2	1.04896	0.967354	0.973686	0.956183	0.82515	0.848164	0.770916	0.864742		-1.66313	-2.01921	-2.15315	-1.75829	0.93256	0.820171	0.992975	0.664848
1825	19132	AA030447	peripherin 1	Prph1	0.879681	1.00019	1.04088	1.00752	0.857468	0.987079	0.974103	1.08948		0.39296	-2.46436	-1.81365	-2.42484	0.811911	-2.38734	-2.1668	-0.353693
1826	16002	AA030546	insulin-like growth factor 2	Igf2	1.05844	0.981948	0.980142	0.863166	0.812261	0.940221	0.822529	1.02748		-1.90261	-2.40118	-2.38734	-0.0627071	0.65796	-1.79535	0.557549	-2.32867
1827	14272	AA032725	farnesyltransferase, CAAX box, alpha	Fnta	0.94238	0.931305	0.961029	1.01026	1.14433	1.06386	1.00627	1.03214		-0.0311237	0.382015	-0.986474	-2.33801	0.988773	0.0747743	-2.41943	-1.44388
1828	17096	AA032394	Yamaguchi sarcoma viral (v-yes-1) oncogene homolog	Lyn	0.900206	1.048	1.0459	0.936715	0.878264	0.911235	0.98191	1.33245		0.843104	-0.821179	-0.903478	-0.000126012	0.964808	0.703837	-2.13924	1
1829	11740	AA033138	solute carrier family 25 (mitochondrial carrier; adenine nucleotide translocator), member 5	Slc25a5	1.03979	0.908996	0.853335	1.08394	1.05223	0.894177	0.963315	1.06635		-1.81365	-0.0155513	0.863455	-0.446339	-1.42344	0.348308	-1.86755	-0.965672
1830	20866	AA032834	stromal interaction molecule 1	Stim1	0.953547	0.881064	0.815525	0.895576	0.808813	0.810586	0.890114	1.00248		-1.15357	0.856943	0.99823	0.703837	0.998969	0.99879	0.770605	-2.45994
1831	14050	AA033245	eyes absent 3 homolog (Drosophila)	Eya3	0.926492	1.33431	1.07739	1.07486	1.04934	1.03569	1.13526	1.23758		0.226327	1	0.173331	0.0893058	-0.882828	-1.50477	0.93256	0.999814
1832	13680	AA033377	DEAD (Asp-Glu-Ala-Asp) box polypeptide 19	Ddx19	0.960568	0.996146	1.1128	1.1321	1.025	1.03437	0.96471	1.13293		-1.06992	-2.44673	0.886977	0.961877	-1.84975	-1.40293	-1.2996	0.963855
1833	54130	AA034697	ARP1 actin-related protein 1 homolog A (yeast)	Actr1a	1.00894	1.03007	1.03742	1.12171	1.06227	1.08632	1.01322	1.08159		-2.42484	-2.06598	-1.86755	0.435299	-1.06992	-0.335522	-2.37993	-0.465212
1834	20183	AA033489	retinoid X receptor gamma	Rxrg	0.93524	1.10029	1.23671	1.2445	1.1704	1.16772	1.12827	1.08001		-0.177764	0.606464	0.999672	0.999794	0.985872	0.983251	0.881459	0.173331
1835	17907	AA032362	myosin light chain, phosphorylatable, fast skeletal muscle	Mylpf	0.933203	0.8298	0.765887	0.735591	1.20986	0.957287	0.801597	0.865002		-2.46365	-1.40293	0.606464	-0.465212	-0.246562	-2.43463	0.239199	-2.15315
1836	11545	AA032357	ADP-ribosyltransferase (NAD+; poly (ADP-ribose) polymerase) 1	Adprt1	1.04376	0.965389	1.14956	1.08062	0.961195	0.936886	0.842381	0.941899		-1.46425	-1.75829	0.878611	-0.160905	-1.60453	-0.60026	0.975263	-0.80074
1837		AA030995			1.00567	1.09563	0.910067	0.776239	0.789644	0.724574	0.716635	0.860887		-2.45007	-0.177764	-0.111166	0.997653	0.994467	0.999937	0.999966	0.789826
1838	12850	AA030846	demethyl-Q 7	Coq7	1.09473	1.27953	1.10548	1.30515	1.3407	1.54452	1.22045	1.31921		0.503976	0.999973	0.671623	0.999994	0.999999	1	0.999094	0.999997
1839	11423	AA030863	acetylcholinesterase	Ache	0.904436	1.02672	1.10772	0.977905	0.924069	0.903121	0.970213	1.09069		-0.780363	-2.30907	-0.739806	-2.34703	-1.36174	-0.739806	-2.25479	-1.09083
1840	17128	AA030901	MAD homolog 4 (Drosophila)	Madh4	0.926149	1.10333	1.00461	1.00251	0.986828	0.943599	1.01096	1.1472		0.760449	0.950414	-2.4299	-2.45307	-2.18018	0.276912	-2.27739	0.99844
1841	19228	AA034782	parathyroid hormone receptor 1	Pthr1	1.05214	0.884108	0.753289	0.8582	0.811441	0.885504	0.888535	0.995881		-1.0073	0.835758	0.999993	0.963855	0.998751	0.824183	0.794412	-2.45307
1842	12832	AA034564	procollagen, type V, alpha 2	Col5a2	0.9578	1.08028	0.959152	0.921256	0.99291	1.03959	0.973923	1.11765		-0.679512	0.636602	-0.76005	0.727688	-2.39443	-0.924171	-1.62418	0.960851
1843	14156	AA034561	flap structure specific endonuclease 1	Fen1	1.03747	1.06383	0.982597	1.03297	1.08293	1.05563	1.00464	1.05145		-1.75829	-0.821179	-2.28825	-1.90261	-0.211893	-1.13265	-2.45571	-1.27881
1844	19652	AA034857	RNA binding motif protein 3	Rbm3	1.23058	1.07446	1.07353	1.07511	1.38539	1.16611	1.07621	1.25367		0.643838	-1.60453	-1.62418	-1.60453	0.98228	0.0302809	-1.58478	0.760449
1845	13016	AA036604	C-terminal binding protein 1	Ctbp1	1.03545	1.12614	1.06488	1.11569	1.15965	1.08751	1.22405	1.17942		-1.84975	0.621774	-0.841676	0.475374	0.878611	-0.127605	0.990841	0.942109
1846	103988	AA014441	glucokinase	Gck	0.822898	0.592478	0.646	0.468716	0.591496	0.416107	0.978158	0.950892		-0.699533	0.970057	0.884247	0.999625	0.970858	0.999968	-2.4299	-2.29881
1847	14254	AA014250	FMS-like tyrosine kinase 1	Flt1	0.985458	1.0159	1.03051	1.03022	0.918235	1.09483	0.992923	0.972668		-2.41368	-2.36412	-2.11067	-2.11067	-0.465212	-0.780363	-2.44305	-2.23104
1848	53331	AA014394	syntaxin 7	Stx7	1.00325	0.946415	1.06631	0.895965	1.00902	1.01671	0.934377	1.15163		-2.45571	-0.862227	-0.503285	0.678286	-2.4076	-2.27739	-0.371986	0.923542
1849	12534	AA035888	cell division cycle 2 homolog A (S. pombe)	Cdc2a	1.04091	0.803012	0.992095	1.12189	0.935692	1.05959	0.818494	0.90457		-2.12508	0.816081	-2.45007	-0.484195	-1.60453	-1.79535	0.709956	-0.821179
1850	14460	AA036275	GATA binding protein 1	Gata1	0.910516	1.07115	1.03137	0.894908	0.903169	1.01317	0.895115	0.97718		0.39296	-0.739806	-2.11067	0.445528	0.54022	-2.24306	0.445528	-2.42484
1851	22057	AA036170	transducer of ErbB-2.1	Tob1	0.763724	0.988082	0.571722	0.652648	0.649065	0.827306	0.778632	0.880011		0.894829	-2.43901	0.999987	0.998828	0.999034	0.424929	0.835758	-0.503285
1852	18391	AA036319	opioid receptor, sigma 1	Oprs1	0.973069	0.862339	1.10373	1.09789	1.13433	1.09572	1.29129	1.30502		-2.1668	0.727688	-0.0787164	-0.229161	0.465565	-0.281761	0.9967	0.997992
1853		AA038087			0.927059	1.06779	0.98232	1.00436	0.863766	0.891384	0.981435	0.985605		-0.0627071	-0.427577	-2.24306	-2.45007	0.945008	0.749918	-2.21874	-2.31903
1854	66684	AA038416	RIKEN cDNA 3930402F23 gene	3930402F23Rik	1.00364	0.868987	1.15012	1.07816	1.166	1.16376	1.14081	1.37303		-2.45994	0.40376	0.39296	-1.06992	0.57436	0.54895	0.276912	0.998751
1855	18563	AA038254	pyruvate carboxylase	Pcx	1.17658	0.894262	0.99326	0.872378	0.764048	0.82258	0.930461	0.870929		0.325103	-0.580671	-2.45307	-0.0787164	0.950414	0.65796	-1.48455	-0.0468426
1856	13090	AA038397	cytochrome P450, family 2, subfamily b, polypeptide 19	Cyp2b19	1.0937	1.28336	0.876273	0.952535	0.984602	0.892884	0.938118	0.9424		-1.60453	0.872736	0.445528	-0.862227	-2.44305	-2.36412	-1.25799	-2.15315
1857	20855	AA038788	stanniocalcin 1	Stc1	0.901877	1.08552	1.06726	0.964197	1.03485	1.04126	1.04962	1.20066		-1.19538	-1.95379	-1.40293	-2.03502	-2.38734	-2.32867	-2.34703	0.301305
1858	18797	AA041709	phospholipase C, beta 3	Plcb3	0.911633	0.906998	0.970046	0.888605	0.842547	0.773288	0.841771	0.946807		-0.000126012	0.117918	-2.01921	0.522365	0.937499	0.999123	0.939071	-1.23714
1859	13000	AA041970	casein kinase II, alpha 2, polypeptide	Csnk2a2	0.948643	1.00836	1.06919	1.0491	1.0896	1.08419	0.985157	1.30548		-0.127605	-2.36412	0.424929	-0.353693	0.807661	0.739001	-2.15315	1
1860	13870	AA041710	excision repair cross-complementing rodent repair deficiency, complementation group 1	Ercc1	1.0344	1.09632	1.1996	1.10643	1.12395	1.03696	0.90006	1.00791		-1.58478	0.566019	0.997725	0.71597	0.869706	-1.48455	0.765573	-2.4076
1861		AA050086			0.933399	1.01314	0.986007	1.02104	0.937743	0.887902	0.999392	0.979876		0.684837	-2.1668	-2.12508	-1.75829	0.57436	0.995095	-2.46365	-1.77689
1862	12386	AA049813	catenin alpha 2	Catna2	0.969177	1.11289	1.03701	1.02071	0.934141	0.869529	1.05041	0.978345		-1.88517	0.54895	-1.72063	-2.20616	-0.484195	0.884247	-1.21627	-2.1668
1863	16897	AA050402	lethal giant larvae homolog	Llglh
1864	19401	AA049907	retinoic acid receptor, alpha	Rara	0.918896	0.76382	0.87204	0.857754	0.848565	0.877618	1.00833	1.04963		0.145927	0.999969	0.899792	0.95649	0.975263	0.863455	-2.41368	-1.17448
1865	21405	AA049898	transcription factor 1	Tcf1	0.970928	1.02538	1.18532	1.21504	1.19441	1.22109	1.27344	1.22222		-1.52491	-1.75829	0.999496	0.999945	0.99974	0.999965	0.999999	0.999969
1866	20182	AA050298	retinoid X receptor beta	Rxrb	0.983963	1.15461	0.983036	1.04915	0.995037	0.939679	1.1062	1.14318		-2.24306	0.970858	-2.21874	-0.944903	-2.44305	-0.317475	0.703837	0.946408
1867		AA050300			0.984449	0.631782	0.808886	1.11141	1.01172	1.52466	1.01189	1.05244		-2.41943	0.999599	0.621774	-0.965672	-2.43901	0.998626	-2.43901	-2.03502
1868		AA050765			0.991861	1.1123	0.97179	0.956153	0.938871	0.926026	0.918368	1.07845		-2.4299	0.40376	-2.03502	-1.52491	-0.841676	-0.371986	-0.111166	-0.40893
1869	18933	AA050726	paired related homeobox 1	Prrx1	1.2359		0.995678			0.960994	0.91075	1.87551		0.709956	-2.41943	-1.86755	-1.27881	0.999229	NA		NA
1870	15463	AA049862	HIV-1 Rev binding protein	Hrb	1.00063	1.04559	1.03039	0.977037	0.964997	0.956226	0.991146	1.15444		-2.46365	-0.944903	-1.66313	-1.95379	-1.38236	-0.924171	-2.38734	0.985464
1871	20463	AA050684	cytochrome c oxidase subunit VIIa polypeptide 2-like	Cox7a2l	1.05361	1.04514	0.953891	0.90959	0.939788	0.884392	0.966485	1.13525		0.39296	0.0151516	0.173331	0.983251	0.691278	0.999229	-0.619942	0.999512
1872	52477	AA050900	DNA segment, Chr 1, ERATO Doi 396, expressed	D1Ertd396e	1.04739	1.07594	1.13794	1.09104	1.10841	1.02813	1.04698	1.35782		-0.659571	0.435299	0.98228	0.72188	0.892267	-1.64372	-0.679512	1
1873	19763	AA050496	ring finger protein 1	Ring1	0.992696	0.934572	0.91981	1.03734	0.902365	0.877745	0.904598	0.879863		-2.39443	0.313278	0.697611	-1.13265	0.904545	0.986657	0.88965	0.984171
1874	14450	AA050540	phosphoribosylglycinamide formyltransferase	Gart	0.950304	1.141	1.22777	1.17463	1.03854	0.971657	0.984383	1.07489		-1.06992	0.869706	0.997725	0.970057	-1.60453	-1.93693	-2.29881	-0.229161
1875		AA050328		ESTs	0.891382	0.942927	0.889063	0.899292	0.876298	0.898745	0.931371	1.00552		0.435299	-1.13265	0.475374	0.264491	0.671623	0.276912	-0.719632	-2.45007
1876	51812	AA048134	microspherule protein 1	Mcrs1	0.944864	0.964393	1.05359	1.132	1.00273	0.927482	0.900118	1.06359		-0.353693	-1.34107	-0.561176	0.94911	-2.45571	0.325103	0.846668	-0.144185
1877	20926	AA048444	suppressor of Ty 6 homolog (S. cerevisiae)	Supt6h	0.933145	1.30489	1.23408	1.08303	0.995183	0.864837	0.995839	1.12226		0.239199	1	0.999961	0.522365	-2.43901	0.992092	-2.44305	0.93589
1878	23834	AA048426	cell division cycle 6 homolog (S. cerevisiae)	Cdc6	1.00222	0.97263	1.03564	1.06602	0.940785	1.01453	1.01591	1.03821		-2.45994	-1.84975	-1.54496	-0.264096	-0.371986	-2.28825	-2.25479	-1.42344
1879	50708	AA049416	histone 1, H1c	Hist1h1c	0.822727	1.00632	1.09206	1.15672	0.753989	0.819363	0.877835	1.16167		0.643838	-2.45571	-1.13265	0.0452614	0.963855	0.678286	-0.229161	0.117918
1880	21945	AA049467	death effector domain-containing	Dedd	0.978838	1.16283	1.02452	0.936102	0.927488	1.01265	0.89018	0.938733		-2.03502	0.989708	-1.91986	-0.0155513	0.289184	-2.30907	0.906846	-0.127605
1881	16907	AA049647	lamin B2	Lmnb2	1.03752	1.38669	1.38208	1.25125	1.19839	1.19641	1.01775	1.13097		-2.1668	0.994125	0.988773	0.860232	0.313278	0.513238	-2.43901	-0.619942
1882	21750	AA049607	telomeric repeat binding factor 2	Terf2	1.00829	1.06235	1.00094	1.01324	1.06296	1.11376	0.910121	1.11368		-2.44673	-1.64372	-2.46418	-2.41943	-1.62418	-0.484195	-0.80074	-0.484195
1883	19242	AA049699	pleiotrophin	Ptn	1.02214	0.913553	0.981455	0.885744	1.11128	1.02467	0.885129	1.19081		-2.42484	-0.619942	-2.35574	0.131998	-0.229161	-2.27739	0.173331	0.760449
1884		AA049744			0.977986	1.10595	0.988806	1.09837	1.12787	0.868435	0.887823	1.27678		-2.29881	-0.317475	-2.41943	-0.503285	0.117918	0.348308	0.0893058	0.940607
1885	18626	AA051328	period homolog 1 (Drosophila)	Per1	0.932476	0.952975	0.960359	0.848613	0.892313	0.867654	0.776177	0.858871		-0.965672	-1.64372	-1.86755	0.820171	0.200131	0.629248	0.995095	0.733394
1886	12048	AA051441	Bcl2-like	Bcl2l	0.934279	0.871401	0.892957	0.891466	0.720362	0.891886	0.932947	0.971202		-1.2996	0.325103	-0.127605	-0.0948698	0.999002	-0.111166	-1.25799	-2.20616
1887	20535	AA048952	solute carrier family 4 (anion exchanger), member 2	Slc4a2	1.02276	0.99735	0.888258	0.863873	0.864129	0.961248	0.990411	0.960351		-1.98692	-2.458	0.925428	0.987758	0.987758	-1.19538	-2.37219	-1.15357
1888	16776	AA049251	laminin, alpha 5	Lama5	0.890223	1.00709	1.03627	0.958405	0.929811	1.01224	1.15041	1.10132		0.348308	-2.44305	-1.95379	-1.75829	-0.780363	-2.40118	0.684837	-0.0787164
1889	20220	AA049308	Sin3-associated polypeptide 18	Sap18	1.00239	1.05593	1.08676	1.20216	1.17549	1.09667	1.06963	1.07085		-2.45307	0.414416	0.93589	0.999999	0.999988	0.972402	0.760449	0.780394
1890	21846	AA049318	tyrosine kinase receptor 1	Tie1	0.992944	1.02652	1.12442	0.9897	0.94199	1.0405	1.01655	1.03835		-2.42484	-1.97046	0.816081	-2.37993	-0.561176	-1.42344	-2.25479	-1.52491
1891	13079	AA058085	cytochrome P450, family 21, subfamily a, polypeptide 1	Cyp21a1	0.949974	1.06017	1.03876	0.914483	0.858186	0.993284	0.908529	1.08279		-1.7016	-1.50477	-2.01921	-0.639713	0.598625	-2.45007	-0.299554	-0.903478
1892	17420	AA058165	menage a trois 1	Mnat1	0.954058	0.952454	1.00213	0.964691	0.914798	0.857142	0.918032	0.870153		-1.32036	-1.25799	-2.46153	-1.73953	0.159704	0.937499	0.0600927	0.872736
1893	11826	AA064011	aquaporin 1	Aqp1	0.97409	1.04764	1.1403	1.31011	1.21298	1.25075	1.32425	1.53466		-1.98692	-1.19538	0.886977	0.999981	0.996597	0.999528	0.999942	1
1894	18102	AA058113	expressed in non-metastatic cells 1, protein	Nme1	1.00354	1.0658	1.35186	1.34359	1.21619	1.30962	1.32863	1.34193		-2.45571	-0.619942	0.999994	0.99999	0.994299	0.999945	0.999979	0.999989
1895	12835	AA059524	procollagen, type VI, alpha 3	Col6a3	0.900967	1.15963	1.16683	1.14099	0.962643	0.903041	1.01963	1.10974		0.226327	0.816081	0.853587	0.671623	-1.83178	0.173331	-2.28825	0.226327
1896	12041	AA059497	branched chain ketoacid dehydrogenase kinase	Bckdk	0.920465	0.942733	1.12927	1.16428	1.03021	0.931575	0.936841	0.940919		0.650957	-0.0468426	0.969236	0.996991	-1.54496	0.370926	0.186807	0.0302809
1897	20893	AA064241	basic helix-loop-helix domain containing, class B2	Bhlhb2	0.862977	0.795603	0.862447	0.760703	0.831155	0.670685	0.561759	0.813106		0.770605	0.992092	0.775544	0.999178	0.945008	0.999999	1	0.979043
1898	17196	AA059540	myelin basic protein	Mbp	0.869091	1.00578	0.884789	0.942444	0.913954	0.880028	1.00383	0.953059		0.853587	-2.44305	0.703837	-0.903478	0.103687	0.755231	-2.45571	-1.34107
1899	17939	AA060459	N-acetyl galactosaminidase, alpha	Naga	0.894244	0.8945	0.905531	0.962647	0.943956	1.01516	1.08105	1.11808		0.684837	0.684837	0.485045	-1.58478	-0.780363	-2.30907	-0.0468426	0.684837
1900	14718	AA060494	glutamate oxaloacetate transaminase 1, soluble	Got1	0.889174	0.90371	0.838094	0.733283	0.800786	0.744598	0.733992	0.793411		0.878611	0.72188	0.996897	1	0.999892	1	1	0.999947
1901	12839	AA060364	procollagen, type IX, alpha 1	Col9a1	1.02388	1.00248	0.936616	0.929967	0.925212	1.03246	0.972242	1.06764		-2.35574	-2.46365	-1.7016	-1.54496	-1.32036	-2.21874	-2.37219	-1.97046
1902	17187	AA060226	Max protein	Max	0.965658	1.24313	1.20772	0.981324	1.05114	1.04114	1.07971	1.10736		-2.09601	0.93589	0.835758	-2.35574	-1.75829	-1.98692	-1.04903	-0.371986
1903	13119	AA060595	cytochrome P450, family 4, subfamily a, polypeptide 14	Cyp4a14	1.01098	0.965639	1.11459	0.696391	0.829382	1.05268	0.668713	0.250871		-2.45307	-2.34703	-1.48455	0.894829	-0.299554	-2.21874	0.950414	1
1904	20818	AA059893	signal recognition particle receptor, B subunit	Srprb	1.01207	0.918212	1.18106	1.13065	1.08856	0.938492	0.974729	0.764906		-2.41368	-0.679512	0.749918	0.200131	-0.699533	-1.32036	-2.24306	0.993947
1905	14567	AA060905	guanosine diphosphate (GDP) dissociation inhibitor 1	Gdi1	0.979704	1.04029	0.933175	0.986381	1.07795	0.995753	0.921728	1.01574		-2.06598	-1.19538	0.117918	-2.27739	0.313278	-2.44673	0.475374	-2.21874
1906		AA060906			0.987918	1.11482	1.12661	1.1343	1.03756	0.996133	1.01583	1.13377		-2.30907	0.88965	0.942109	0.962878	-1.27881	-2.44673	-2.20616	0.961877
1907	11287	AA061055	pregnancy zone protein	Pzp	0.999264	0.999623	0.999188	0.999049	0.978428	0.973491	0.999484	0.998117		-2.46418	-2.46418	-2.46418	-2.46365	-2.20616	-2.08112	-2.46418	-2.46277
1908		AA061838			0.971513	1.00349	1.16833	0.959443	1.08257	1.09395	0.904308	1.15733		-1.56492	-2.45007	0.998054	-0.882828	0.606464	0.780394	0.884247	0.995785
1909	16426	AA062129	inter-alpha trypsin inhibitor, heavy chain 3	Itih3	1.06821	0.917432	0.932722	0.893176	0.868069	0.814339	0.758294	0.762697		-1.58478	-1.11174	-1.50477	-0.503285	0.0600927	0.760449	0.96753	0.960851
1910	22229	AA062091	uncoupling protein 3, mitochondrial	Ucp3	0.949008	0.989663	0.985119	0.933406	0.961169	0.859496	0.885851	0.946759		-0.862227	-2.37993	-2.28825	-0.19476	-1.42344	0.970057	0.853587	-0.76005
1911	11364	AA061679	acetyl-Coenzyme A dehydrogenase, medium chain	Acadm	0.960363	1.02755	0.976589	0.848567	0.971306	0.999561	0.994732	0.974877		-1.23714	-1.84975	-1.98692	0.993947	-1.75829	-2.46418	-2.43901	-1.91986
1912	18479	AA061378	p21 (CDKN1A)-activated kinase 1	Pak1	0.94222	0.942542	0.951757	0.912074	0.900203	0.885746	0.898627	1.11404		-0.390399	-0.40893	-0.841676	0.582575	0.775544	0.904545	0.794412	0.807661
1913	19660	AA061550	retinol binding protein 2, cellular	Rbp2	1.04077	1.06332	1.05492	1.13393	1.16745	1.07955	1.03829	0.995898		-1.72063	-0.965672	-1.25799	0.643838	0.881459	-0.446339	-1.79535	-2.45571
1914	22318	AA061343	vesicle-associated membrane protein 2	Vamp2	0.937956	0.995948	0.920856	0.913781	0.890923	0.990763	1.00844	0.942474		-0.177764	-2.45007	0.40376	0.57436	0.878611	-2.38734	-2.40118	-0.371986
1915	17131	AA061644	MAD homolog 7 (Drosophila)	Madh7	1.11818	1.14222	0.902534	0.887255	0.923868	0.798499	0.815845	0.953661		0.629248	0.846668	0.485045	0.733394	-0.0948698	0.998936	0.996153	-1.27881
1916	13805	AA080278	endoglin	Eng	1.13403	1.02697	1.09053	0.855538	1.05206	1.2298	0.907365	0.785447		-0.60026	-2.34703	-1.25799	-0.0627071	-2.05062	0.54895	-1.17448	0.775544
1917	12748	AA097860	CDC-like kinase 2	Clk2	0.92623	0.993473	0.897083	0.785401	0.856135	0.887118	0.82838	0.949664		0.513238	-2.41368	0.921613	0.999999	0.997502	0.963855	0.999848	-0.390399
1918	12153	AA097223	bone morphogenetic protein 1	Bmp1	1.00375	0.889714	0.878914	0.704891	0.786548	0.774393	0.818846	0.758725		-2.45007	0.934244	0.970858	1	0.999996	0.999999	0.999872	1
1919	18654	AA098166	placental growth factor	Pgf	1.04765	1.06344	0.999864	0.974431	1.06596	1.03661	1.03322	1.13927		-0.639713	0.0600927	-2.46436	-1.73953	0.145927	-1.21627	-1.38236	0.984171
1920	17762	AI427767	microtubule-associated protein tau	Mapt	1.08629	0.98227	1.08526	1.03137	1.07456	0.968283	1.01483	1.12682		0.325103	-2.20616	0.301305	-1.73953	-0.000126012	-1.68243	-2.28825	0.869706
1921		AA061388			1.04309	0.95593	0.961358	1.05312	1.01169	1.0403	1.09293	1.10979		-0.52248	-0.353693	-0.699533	-0.0155513	-2.25479	-0.679512	0.88965	0.966645
1922	26369	AA061546	centrin 1	Cetn1	0.999047	1.04889	1.04522	0.975598	0.989339	1.05155	1.03611	1.06419		-2.46153	0.301305	0.131998	-1.23714	-2.19331	0.40376	-0.40893	0.755231
1923	18598	AA061521	pyruvate dehydrogenase E1 alpha 2	Pdha2	0.999107	0.96431	0.97099	0.928444	0.920672	1.02285	1.05129	1.02885		-2.46277	-0.80074	-1.25799	0.744508	0.860232	-1.68243	-0.0311237	-1.32036
1924	21756	AA063894	testicular serine protease 2	Tesp2	1.0011	0.946592	0.91775	0.854205	0.868398	0.92314	1.07512	1.07297		-2.46277	-0.211893	0.71597	0.99823	0.99338	0.606464	0.424929	0.370926
1925	15504	AA061150	DnaJ (Hsp40) homolog, subfamily B, member 3	Dnajb3
1926	11451	AA065536	acrosomal vesicle protein 1	Acrv1	0.965384	0.951511	0.878041	0.894394	0.861506	0.916559	1.01206	1.02683		-1.15357	-0.353693	0.989708	0.958723	0.997928	0.785154	-2.27739	-1.64372
1927	11910	AA062231	activating transcription factor 3	Atf3	0.99543	0.917814	0.934667	0.956694	0.918642	0.910757	0.992409	0.966111		-2.42484	0.899792	0.636602	-0.281761	0.892267	0.946408	-2.36412	-0.882828
1928	21461	AA118406	t-complex protein 10b	Tcp10b	0.981403	1.05702	1.07807	0.933688	0.947243	1.05546	1.11608	1.08839		-2.29881	-1.25799	-0.580671	-0.80074	-1.2996	-1.2996	0.336779	-0.281761
1929	19821	AA089102	ring finger protein 2	Rnf2	0.945204	0.970492	1.04421	0.995224	0.909675	1.00162	1.0534	1.03165		-0.484195	-1.72063	-1.09083	-2.44305	0.65796	-2.46153	-0.679512	-1.66313
1930	16833	AA110449	lactate dehydrogenase 3, C chain, sperm specific	Ldh3	0.993149	0.996196	0.926226	0.865108	0.904475	1.02397	1.06237	0.985693		-2.41943	-2.45007	0.25192	0.979043	0.739001	-1.98692	-0.317475	-2.27739
1931	18459	AA108977	poly A binding protein, cytoplasmic 2	Pabpc2	0.951856	1.08712	1.03864	1.31123	1.00965	1.12798	1.38022	0.977791		-1.77689	-2.09601	-2.27739	0.54895	-2.29881	-1.62418	0.982772	-2.4299
1932	13137	AI326546	decay accelerating factor 2	Daf2	0.995491	1.03509	0.957066	1.07881	1.03819	1.07845	1.13746	1.25563		-2.45007	-1.68243	-1.2996	-0.0468426	-1.56492	-0.0468426	0.875704	0.999649
1933	11495	AA108219	a disintegrin and metalloprotease domain 2	Adam2	1.1011	1.86593	2.26213	2.82329	2.4998	3.5475	2.65602	2.51256		-0.780363	1	1	1	1	1	1	1
1934	18981	AA066640
1935	12321	AA067258	calumenin	Calu	0.927733	0.951109	0.871339	0.996882	0.772989	0.855244	0.953646	1.25644		-0.719632	-1.52491	0.650957	-2.45994	0.997502	0.811911	-1.60453	0.990003
1936	17977	AA097341	nuclear receptor coactivator 1	Ncoa1	0.99755	0.889781	1.00618	0.960506	0.925285	0.883416	0.948437	0.994589		-2.46153	0.629248	-2.44305	-1.62418	-0.264096	0.71597	-1.15357	-2.44673
1937	17246	AA072086	transformed mouse 3T3 cell double minute 2	Mdm2	0.985104	1.1077	1.08253	0.932847	1.1545	0.993831	1.13573	1.23241		-2.34703	0.25192	-0.353693	-0.679512	0.820171	-2.44305	0.671623	0.99029
1938	22235	AA067191	UDP-glucose dehydrogenase	Ugdh	1.25321	2.73652	3.05287	3.06416	2.6749	2.78483	2.81521	2.66394		0.99057	1	1	1	1	1	1	1
1939	16905	AA066180	lamin A	Lmna	1.0305	1.25293	1.52166	1.44691	1.37798	1.62114	1.56625	1.4032		-2.21874	0.475374	0.999748	0.994299	0.968394	0.986657	0.999987	0.942109
1940	22129	AA065714	tetratricopeptide repeat domain 3	Ttc3	1.01355	0.972768	0.905042	1.01917	1.00545	1.07101	1.08124	1.06489		-2.25479	-1.64372	0.872736	-2.05062	-2.4299	0.313278	0.566019	0.117918
1941	12013	AA088927	BTB and CNC homology 1	Bach1	1.05303	1.54883	0.936732	0.923917	0.957493	1.09856	1.13772	1.11795		-1.7016	0.999995	-1.34107	-0.944903	-1.90261	-0.541778	0.226327	-0.127605
1942	20619	AA088934	synaptosomal-associated protein 23	Snap23	0.936669	0.924696	0.859768	0.761851	0.795808	0.814754	0.984844	0.959026		-0.144185	0.289184	0.985045	0.999998	0.999945	0.999672	-2.25479	-1.19538
1943	15254	AA068901	histidine triad nucleotide binding protein	Hint	1.03658	1.0592	1.07312	1.0961	0.998994	1.13389	1.09288	1.15358		-1.38236	-0.335522	0.159704	0.671623	-2.46365	0.951688	0.621774	0.984171
1944	20315	AA068750	chemokine (C-X-C motif) ligand 12	Cxcl12	1.12204	0.924639	0.696796	0.668711	0.712851	0.641527	0.669824	0.494014		0.850162	0.226327	1	1	1	1	1	1
1945	20302	AA071899	chemokine (C-C motif) ligand 3	Ccl3	0.927068	0.919061	0.900295	0.966635	0.963637	0.918832	1.07302	1.02728		0.103687	0.348308	0.727688	-1.62418	-1.48455	0.35969	-0.541778	-1.90261
1946	12842	AA073604	procollagen, type I, alpha 1	Col1a1
1947	22627	AA080011	tyrosine 3-monooxygenase/tryptophan 5-monooxygenase activation protein, epsilon polypeptide	Ywhae	0.827915	0.887753	0.96372	1.07354	0.887986	0.986329	1.27871	1.14491		0.863455	0.0893058	-2.03502	-1.13265	0.0893058	-2.40118	0.981775	0.370926
1948	27226	AA073963	phospholipase A2, group VII (platelet-activating factor acetylhydrolase, plasma)	Pla2g7	0.977238	0.890534	0.943159	1.08357	0.873965	0.921528	1.1227	1.13595		-2.40118	-1.25799	-2.06598	-1.83178	-0.841676	-2.11067	-1.38236	-0.821179
1949	12362	AA098139	caspase 1	Casp1	0.965527	0.863537	0.924558	1.04608	0.864352	0.858448	1.13223	1.10786		-2.11067	0.424929	-1.04903	-1.90261	0.414416	0.503976	0.0600927	-0.427577
1950	11798	AA097958	baculoviral IAP repeat-containing 4	Birc4	0.896852	1.02415	0.824592	0.872464	0.680388	0.764282	0.850847	0.852963		-0.0787164	-2.26624	0.894829	0.435299	0.999973	0.994299	0.71597	0.691278
1951	13117	AA097980	cytochrome P450, family 4, subfamily a, polypeptide 10	Cyp4a10	1.16122	1.0783	1.06444	0.844646	0.876472	1.01156	0.95615	0.545425		-0.903478	-1.97046	-2.11067	-0.619942	-1.17448	-2.45307	-2.27739	0.999229
1952	17756	AA125125	microtubule-associated protein 2	Mtap2	1.00848	1.12291	1.14787	1.38076	1.28508	1.21212	1.20664	1.02648		-2.38734	0.940607	0.987034	1	0.999999	0.999832	0.999757	-1.77689
1953	15369	AA183852	heme oxygenase (decycling) 2	Hmox2	0.923945	0.856711	0.945228	0.975018	0.933088	0.952129	1.00536	1.0717		0.606464	0.998054	-0.127605	-1.75829	0.35969	-0.465212	-2.4299	0.35969
1954	12971	AA108639	crystallin, mu	Crym	0.972706	0.974551	1.04335	1.00791	0.948298	0.853858	0.919213	1.10753		-1.68243	-1.77689	-0.903478	-2.39443	-0.353693	0.997725	0.650957	0.872736
1955	27367	AA108363	ribosomal protein L3	Rpl3	0.999363	0.945126	0.998431	1.0762	0.978184	1.17448	1.04718	1.06434		-2.46418	-0.965672	-2.46277	-0.335522	-2.1668	0.952932	-1.36174	-0.739806
1956	57320	AA108826	Parkinson disease (autosomal recessive, early onset) 7	Park7	0.93933	0.95855	0.970769	0.983103	1.01102	1.04253	1.06472	0.933621		0.173331	-0.780363	-1.50477	-2.11067	-2.30907	-0.821179	0.173331	0.370926
1957	19265	AA108738	protein tyrosine phosphatase, receptor type, C polypeptide-associated protein	Ptprcap
1958	19215	AA108857	prostaglandin D2 synthase (brain)	Ptgds	0.999652	0.997882	0.999327	0.999244	1.00008	1.01144	1.00782	1.0338		-2.46418	-2.45307	-2.46365	-2.46277	-2.46436	-2.18018	-2.32867	-0.679512
1959	12176	AA105295	BCL2/adenovirus E1B 19kDa-interacting protein 1, NIP3	Bnip3	1.12038	1.01919	0.937284	0.865614	0.924844	0.982884	1.07688	0.988682		-0.335522	-2.37219	-1.52491	0.239199	-1.19538	-2.38734	-1.2996	-2.4299
1960	12747	AA108933	CDC-like kinase	Clk	1.01374	0.958833	0.806799	0.849236	0.784555	0.902929	0.894013	0.864263		-2.28825	-1.11174	0.999899	0.995095	0.99999	0.780394	0.872736	0.983717
1961	20750	AA108928	secreted phosphoprotein 1	Spp1	1.13956	0.964062	1.04045	1.10267	0.963536	1.04302	1.15329	1.05982		0.749918	-1.79535	-1.68243	0.226327	-1.77689	-1.60453	0.843104	-1.0073
1962	12315	AA109041	calmodulin 3	Calm3	0.936069	1.0179	0.98002	1.03795	0.952777	0.931492	1.04637	1.20233		0.414416	-2.03502	-1.91986	-0.944903	-0.317475	0.54895	-0.484195	0.999959
1963	17874	AA110412	myeloid differentiation primary response gene 88	Myd88	1.01495	1.00118	1.04063	1.08566	1.00109	1.17854	1.0094	1.00834		-2.33801	-2.46365	-1.64372	-0.111166	-2.46365	0.950414	-2.41368	-2.42484
1964	23857	AA111662	cyclin D binding myb-like transcription factor 1	Dmtf1	0.949043	0.986476	0.879274	0.92385	1.02439	0.929298	1.05087	1.0795		-0.699533	-2.29881	0.937499	0.301305	-1.97046	0.131998	-0.821179	0.226327
1965		AA111722			1.06111	1.10969	0.963916	0.92092	0.877284	0.882762	0.781382	0.720218		-1.46425	-0.246562	-2.03502	-0.80074	0.301305	0.382015	0.984614	0.999443
1966	225363	AA111688	eukaryotic translation termination factor 1	Etf1	1.07228	1.11426	1.0235	1.04444	1.09265	0.904728	0.949791	1.06528		-0.52248	0.494579	-2.1668	-1.52491	-0.299554	0.336779	-1.21627	-0.76005
1967	15001	AA118886	histocompatibility 2, O region alpha locus	H2-Oa	1.05711	1.06461	1.10895	0.768165	1.18665	1.06015	1.10517	0.90537		-1.97046	-2.31903	-1.40293	0.643838	-1.52491	-2.23104	-1.84975	-2.11067
1968		AA118721			0.97172	1.20575	1.13305	1.07093	1.04182	1.03658	1.04157	1.18703		-1.58478	0.999876	0.978453	0.325103	-0.903478	-1.19538	-0.924171	0.999496
1969	22596	AA118775	X-ray repair complementing defective repair in Chinese hamster cells 5	Xrcc5	0.982861	0.904305	0.919267	0.966398	0.944745	0.993406	0.868779	0.944359		-1.73953	0.996382	0.976589	-0.427577	0.684837	-2.34703	0.999979	0.697611
1970		AI530569
1971	50497	AA119654	heat shock protein 4	Hsp70-4	0.948888	0.889044	0.834348	0.832471	0.758359	0.936342	0.904434	0.913813		-0.719632	0.878611	0.997725	0.998054	0.999998	-0.160905	0.709956	0.54022
1972	66447	AA120639	microsomal glutathione S-transferase 3	Mgst3	0.963611	1.00056	0.857092	0.964898	0.960067	0.993292	1.0754	0.88397		-1.90261	-2.46418	0.807661	-1.93693	-1.79535	-2.44305	-0.780363	0.475374
1973	20841	AA118392	zinc finger protein 143	Zfp143	0.990833	1.02719	0.888486	1.08196	1.02958	0.944954	0.961467	1.06326		-2.4299	-2.19331	0.226327	-0.76005	-2.15315	-1.42344	-1.91986	-1.27881
1974	12499	AA120757	ectonucleoside triphosphate diphosphohydrolase 5	Entpd5	0.89084	0.919605	0.94971	0.972039	0.874617	0.877192	1.03491	1.02161		0.455617	-0.40893	-1.44388	-2.08112	0.703837	0.671623	-1.91986	-2.24306
1975		AA125367			0.89854	1.03738	0.820258	0.934505	0.85018	0.888854	1.1917	0.920182		0.103687	-1.93693	0.95649	-1.0073	0.828117	0.325103	0.892267	-0.52248
1976		AI323634			0.920646	1.03202	0.957261	0.967203	0.827539	0.972206	0.976585	0.972515		0.445528	-1.62418	-1.04903	-1.54496	0.999229	-1.77689	-1.97046	-1.79535
1977	12465	AA120241	chaperonin subunit 5 (epsilon)	Cct5	1.0109	1.00143	1.08437	1.11227	1.04112	1.01501	1.07866	1.06567		-2.29881	-2.46153	0.739001	0.952932	-0.780363	-2.1668	0.643838	0.313278
1978	21841	AA117605	cytotoxic granule-associated RNA binding protein 1	Tia1	0.948234	0.929631	0.917405	0.9175	0.896872	0.832255	0.98734	1.01798		-1.42344	-0.780363	-0.371986	-0.371986	0.200131	0.934244	-2.39443	-2.32867
1979	12429	AA124592	cyclin B1, related sequence 1	Ccnb1-rs1	0.984749	0.815104	1.26352	1.26808	1.0883	0.838841	1.04387	0.794523		-2.41943	0.650957	0.824183	0.839467	-1.2996	0.382015	-2.11067	0.807661
1980		AA120355			0.995137	1.00568	0.921993	0.99644	0.9543	0.868609	0.99921	0.903802		-2.45007	-2.44673	-0.246562	-2.458	-1.46425	0.780394	-2.46418	0.226327
1981		AA120351			0.937039	0.9973	0.964225	0.921625	0.847068	0.938495	0.889742	1.00734		-0.541778	-2.45994	-1.68243	0.0151516	0.972402	-0.60026	0.72188	-2.4299
1982	18201	AA122528	neutral sphingomyelinase (N-SMase) activation associated factor	Nsmaf	0.951334	1.01781	0.958388	0.912682	0.816707	0.901598	0.976136	0.967519		-0.659571	-2.15315	-1.50477	0.684837	0.999853	0.835758	-1.90261	-1.50477
1983	16963	AA120030	chemokine (C motif) ligand 1	Xcl1	0.905125	0.982912	0.928223	0.982812	0.959756	0.906641	1.06953	1.02227		0.475374	-2.05062	-0.699533	-2.26624	-1.48455	0.445528	-0.446339	-2.15315
1984	233835	AA116548	trinucleotide repeat containing 6	Tnrc6	1.00325	1.00621	0.86908	0.911477	0.825581	1.04241	0.950992	1.01915		-2.458	-2.43901	0.909097	0.336779	0.994299	-1.46425	-1.11174	-2.23104
1985	20292	AA139170	small chemokine (C-C motif) ligand 11	Ccl11	0.951791	1.08119	0.979952	0.793571	0.895847	0.974418	1.05281	1.00715		-1.75829	-0.944903	-2.32867	0.966645	-0.127605	-2.25479	-1.7016	-2.44673
1986	22019	AA139288	tripeptidyl peptidase II	Tpp2	0.993634	0.964343	0.978774	0.951735	0.91547	0.838889	1.04111	1.06398		-2.37993	-1.64372	-2.34703	-0.780363	0.951688	0.999997	-0.335522	0.61418
1987	12460	AA123360	copper chaperone for superoxide dismutase	Ccs	1.04573	0.97478	0.93801	0.963303	1.01157	0.989721	1.09846	0.98939		-1.2996	-2.03502	-0.52248	-1.60453	-2.37219	-2.38734	0.39296	-2.38734
1988	14600	AA124236	growth hormone receptor	Ghr	0.990202	1.09335	0.828309	0.760024	0.622884	0.676683	0.65014	0.644124		-2.41368	-0.0155513	0.977848	0.999794	1	1	1	1
1989	13850	AA124202	epoxide hydrolase 2, cytoplasmic	Ephx2	1.02418	0.977034	0.991359	1.0278	0.984197	1.16523	1.27494	0.76889		-2.34703	-2.34703	-2.44673	-2.30907	-2.4076	0.159704	0.72188	0.934244
1990	14433	AA122891	glyceraldehyde-3-phosphate dehydrogenase	Gapd	1.00337	1.0009	1.00167	0.999668	0.999384	0.98458	0.999391	1.00685		-2.44673	-2.46277	-2.45994	-2.46418	-2.46365	-2.11067	-2.46365	-2.39443
1991	21859	AA145784	tissue inhibitor of metalloproteinase 3	Timp3	1.04487	1.20245	1.16603	1.02931	1.0975	0.996013	1.15607	1.07209		-1.77689	0.909097	0.739001	-2.15315	-0.299554	-2.458	0.65796	-0.986474
1992	110454	AA145865	lymphocyte antigen 6 complex, locus A	Ly6a	0.850941	1.063	1.16967	1.44635	1.0208	1.29	1.62451	2.48156		0.186807	-1.79535	0.117918	0.996153	-2.37993	0.892267	0.999931	1
1993	20517	AA140078	solute carrier family 22 (organic cation transporter), member 1	Slc22a1
1994	11501	AA154162	a disintegrin and metalloprotease domain 8	Adam8
1995	15482	AA154104	heat shock protein 1-like	Hspa1l	1.02827	1.37969	1.48102	1.13808	1.00173	0.913163	1.06413	1.09171		-2.28825	0.991613	0.999301	-0.177764	-2.46365	-1.02816	-1.7016	-1.11174
1996	20963	AA142676	spleen tyrosine kinase	Syk	0.939907	0.890569	0.890188	0.928119	0.783625	0.917593	0.967749	1.03311		-0.541778	0.770605	0.775544	-0.0787164	0.999888	0.25192	-1.75829	-1.75829
1997	21456	AA143990
1998	20773	AA123420	serine palmitoyltransferase, long chain base subunit 2	Sptlc2
[truncated: 11,363 more rows]
