# Supplementary material for: Temporal and Dose-Dependent Hepatic Gene Expression Patterns in Mice Provide New Insights into TCDD-Mediated Hepatotoxicity
Source: Oxford University Press journal article supplement (doi:10.1093/toxsci/kfi162), 2005-03-30
Supplement: kfi162_Supplementary_Data.zip [file kfi162_Supplementary_Data.zip › kfi162supptable5.pdf]

SupplTable 5. DREs identified in promoter sequences (-1500 to +1500 of the transcriptional start site) for genes listed in Table 3

| refseq    | locuslink | gene_abbr | gene_name                                             | match_ind | mat_score | dre_seq              | match_str |
|-----------|-----------|-----------|-------------------------------------------------------|-----------|-----------|----------------------|-----------|
| NM_025341 | 66082     | Abhd6     | abhydrolase domain containing 6                       | 709       | 0.8379    | gagatctGCGTGcctctgt  | +         |
| NM_025341 | 66082     | Abhd6     | abhydrolase domain containing 6                       | 1187      | 0.8009    | tggctgaGCGTGatttgaa  | +         |
| NM_009692 | 11806     | Apoa1     | apolipoprotein A-I                                    | 310       | 0.8291    | ttagcctGCGTGggactac  | +         |
| NM_009692 | 11806     | Apoa1     | apolipoprotein A-I                                    | 577       | 0.8056    | agacctagCGTGgggcctg  | +         |
| NM_009811 | 12368     | Casp6     | caspase 6                                             | -132      | 0.8105    | agaaaccGCGTGccttgcc  | -         |
| NM_173047 | 109857    | Cbr3      | carbonyl reductase 3                                  | 1185      | 0.9357    | gcgccttGCGTGagagcca  | +         |
| NM_173047 | 109857    | Cbr3      | carbonyl reductase 3                                  | -650      | 0.907     | tctgattGCGTGccacat   | +         |
| NM_173047 | 109857    | Cbr3      | carbonyl reductase 3                                  | 686       | 0.8608    | ccttcgtGCGTGggacaga  | -         |
| NM_173047 | 109857    | Cbr3      | carbonyl reductase 3                                  | 487       | 0.8507    | gcgccttGCGTGgcgagtt  | +         |
| NM_173047 | 109857    | Cbr3      | carbonyl reductase 3                                  | 749       | 0.8444    | tgccttcGCGTGaaacaag  | +         |
| NM_173047 | 109857    | Cbr3      | carbonyl reductase 3                                  | 148       | 0.8412    | CGATCAGCGTGACCTGTG   | +         |
| NM_173047 | 109857    | Cbr3      | carbonyl reductase 3                                  | 27        | 0.8295    | TGACCACGCGTGACCCGCT  | +         |
| NM_173047 | 109857    | Cbr3      | carbonyl reductase 3                                  | 145       | 0.7873    | aggtcacGCGTGatcgcaa  | -         |
| NM_173047 | 109857    | Cbr3      | carbonyl reductase 3                                  | 252       | 0.7829    | ggtagaaGCGTGggctcag  | -         |
| NM_173047 | 109857    | Cbr3      | carbonyl reductase 3                                  | 1496      | 0.7594    | gacatgaGCGTGgctgatg  | +         |
| NM_173047 | 109857    | Cbr3      | carbonyl reductase 3                                  | 24        | 0.7573    | gggtcacGCGTGgtcaaaa  | -         |
| NM_173047 | 109857    | Cbr3      | carbonyl reductase 3                                  | -633      | 0.7503    | attccagCGTGtctaatt   | -         |
| NM_173047 | 109857    | Cbr3      | carbonyl reductase 3                                  | 99        | 0.7415    | TGCAGCCGCGTGCCCTGG   | +         |
| NM_173047 | 109857    | Cbr3      | carbonyl reductase 3                                  | 654       | 0.7406    | tgacaagGCGTGgtcccct  | -         |
| NM_009992 | 13076     | Cyp1a1    | cytochrome P450, family 1, subfamily a, polypeptide 1 | -984      | 0.9805    | cggagttGCGTGaagaag   | -         |
| NM_009992 | 13076     | Cyp1a1    | cytochrome P450, family 1, subfamily a, polypeptide 1 | -1206     | 0.973     | cgggtttGCGTGgagtcgt  | -         |
| NM_009992 | 13076     | Cyp1a1    | cytochrome P450, family 1, subfamily a, polypeptide 1 | -871      | 0.9499    | cctgtgtGCGTGccaagca  | +         |
| NM_009992 | 13076     | Cyp1a1    | cytochrome P450, family 1, subfamily a, polypeptide 1 | -491      | 0.9394    | caagctcGCGTGagaagcg  | -         |
| NM_009992 | 13076     | Cyp1a1    | cytochrome P450, family 1, subfamily a, polypeptide 1 | -1059     | 0.9133    | ccagctaGCGTGacagcac  | +         |
| NM_009992 | 13076     | Cyp1a1    | cytochrome P450, family 1, subfamily a, polypeptide 1 | -895      | 0.8585    | gaggctaGCGTGcgttaagc | -         |
| NM_009992 | 13076     | Cyp1a1    | cytochrome P450, family 1, subfamily a, polypeptide 1 | -1294     | 0.8377    | cagctagGCGTGccgggtg  | +         |
| NM_009992 | 13076     | Cyp1a1    | cytochrome P450, family 1, subfamily a, polypeptide 1 | -1277     | 0.8354    | tgtgtctGCGTGtctgcc   | +         |
| NM_009992 | 13076     | Cyp1a1    | cytochrome P450, family 1, subfamily a, polypeptide 1 | -1382     | 0.8002    | gaacttgGCGTGtctaact  | -         |
| NM_009992 | 13076     | Cyp1a1    | cytochrome P450, family 1, subfamily a, polypeptide 1 | -822      | 0.796     | ctgtctcGCGTGgatctct  | +         |
| NM_009992 | 13076     | Cyp1a1    | cytochrome P450, family 1, subfamily a, polypeptide 1 | -1249     | 0.7825    | ctgaacaGCGTGgtccac   | -         |
| NM_009992 | 13076     | Cyp1a1    | cytochrome P450, family 1, subfamily a, polypeptide 1 | -52       | 0.7609    | taaggagGCGTGccaaca   | +         |
| NM_011303 | 20148     | Dhrs3     | dehydrogenase/reductase (SDR family) member 3         | 684       | 0.904     | cctccctGCGTGccagagt  | -         |
| NM_011303 | 20148     | Dhrs3     | dehydrogenase/reductase (SDR family) member 3         | -719      | 0.8574    | cclaggcGCGTGccccgcc  | +         |
| NM_011303 | 20148     | Dhrs3     | dehydrogenase/reductase (SDR family) member 3         | 600       | 0.773     | TCCGAGAGCGTGCGCCAG   | +         |
| NM_011303 | 20148     | Dhrs3     | dehydrogenase/reductase (SDR family) member 3         | -566      | 0.7619    | agctgcgGCGTGgaccgaa  | -         |
| NM_011303 | 20148     | Dhrs3     | dehydrogenase/reductase (SDR family) member 3         | 623       | 0.7488    | gtacacgGCGTGggggcgg  | +         |
| NM_011303 | 20148     | Dhrs3     | dehydrogenase/reductase (SDR family) member 3         | -839      | 0.7398    | ggttgcaGCGTGtctgagt  | +         |
| NM_010145 | 13849     | Ephx1     | epoxide hydrolase 1, microsomal                       | 71        | 0.8456    | cactocaGCGTGagagttg  | +         |
| NM_010145 | 13849     | Ephx1     | epoxide hydrolase 1, microsomal                       | 720       | 0.8227    | tggctgtGCGTGgtctgac  | +         |
| NM_010145 | 13849     | Ephx1     | epoxide hydrolase 1, microsomal                       | 144       | 0.8088    | gatccagGCGTGcaatagg  | +         |
| NM_010145 | 13849     | Ephx1     | epoxide hydrolase 1, microsomal                       | -377      | 0.7988    | gtgtctcGCGTGggcaagg  | -         |
| NM_010145 | 13849     | Ephx1     | epoxide hydrolase 1, microsomal                       | 790       | 0.7778    | aacgtggGCGTGttagca   | +         |
| NM_010634 | 16592     | Fabp5     | fatty acid binding protein 5, epidermal               | 341       | 0.9138    | cacaggtGCGTGccagcgg  | +         |
| NM_010634 | 16592     | Fabp5     | fatty acid binding protein 5, epidermal               | 462       | 0.8376    | tccctcgGCGTGgcagcac  | +         |
| NM_010634 | 16592     | Fabp5     | fatty acid binding protein 5, epidermal               | -1306     | 0.8366    | cagggcaGCGTGactgcag  | +         |
| NM_010634 | 16592     | Fabp5     | fatty acid binding protein 5, epidermal               | 559       | 0.7979    | ggacacgGCGTGgtagggc  | +         |
| NM_010634 | 16592     | Fabp5     | fatty acid binding protein 5, epidermal               | -118      | 0.7931    | agtccggGCGTGgaggagg  | +         |
| NM_010634 | 16592     | Fabp5     | fatty acid binding protein 5, epidermal               | 669       | 0.7596    | tggctagGCGTGgcccgc   | +         |
| NM_010634 | 16592     | Fabp5     | fatty acid binding protein 5, epidermal               | 569       | 0.7268    | tgttaggGCGTGgtttctg  | +         |
| NM_008655 | 17873     | Gadd45b   | growth arrest and DNA-damage-inducible 45 beta        | -1443     | 0.8991    | ggaaagtGCGTGgacagag  | +         |
| NM_008655 | 17873     | Gadd45b   | growth arrest and DNA-damage-inducible 45 beta        | -1394     | 0.8858    | gtccctgGCGTGagaggcg  | -         |
| NM_008655 | 17873     | Gadd45b   | growth arrest and DNA-damage-inducible 45 beta        | -207      | 0.8055    | gggaggaGCGTGaacgcca  | -         |
| NM_008655 | 17873     | Gadd45b   | growth arrest and DNA-damage-inducible 45 beta        | 512       | 0.7884    | ggagcgcGCGTGcatcaga  | -         |
| NM_008655 | 17873     | Gadd45b   | growth arrest and DNA-damage-inducible 45 beta        | -1208     | 0.7882    | tagacccGCGTGggattct  | -         |
| NM_008655 | 17873     | Gadd45b   | growth arrest and DNA-damage-inducible 45 beta        | -1059     | 0.778     | cttcacGCGTGtcattta   | -         |
| NM_008655 | 17873     | Gadd45b   | growth arrest and DNA-damage-inducible 45 beta        | -66       | 0.7753    | ggtagagGCGTGgccaactg | -         |
| NM_008655 | 17873     | Gadd45b   | growth arrest and DNA-damage-inducible 45 beta        | 486       | 0.7725    | ttctcggGCGTGggtgggg  | +         |
| NM_008655 | 17873     | Gadd45b   | growth arrest and DNA-damage-inducible 45 beta        | -1056     | 0.7706    | atgacacGCGTGgaagaag  | +         |
| NM_008655 | 17873     | Gadd45b   | growth arrest and DNA-damage-inducible 45 beta        | 951       | 0.7529    | CCCGACAGCGTGCTTTGT   | +         |
| NM_008086 | 14451     | Gas1      | growth arrest specific 1                              | 1201      | 0.8011    | AACGACTGCGTGTCGATG   | +         |
| NM_008086 | 14451     | Gas1      | growth arrest specific 1                              | 994       | 0.7725    | ACCAGCAGCGTGGGCCCGG  | +         |
| NM_008086 | 14451     | Gas1      | growth arrest specific 1                              | 893       | 0.7667    | ccgcggcGCGTGgtgttga  | -         |
| NM_010292 | 103988    | Gck       | glucokinase                                           | -1259     | 0.7337    | tccaggcGCGTGgtctctt  | -         |
| NM_010302 | 14673     | Gna12     | guanine nucleotide binding protein, alpha 12          | 1197      | 0.8856    | acttcatGCGTGctaggga  | +         |
| NM_010302 | 14673     | Gna12     | guanine nucleotide binding protein, alpha 12          | -131      | 0.8211    | tggacaaGCGTGccttga   | -         |
| NM_010324 | 14718     | Got1      | glutamate oxaloacetate transaminase 1, soluble        | -930      | 0.8429    | ccaacaaGCGTGttaagag  | +         |
| NM_010324 | 14718     | Got1      | glutamate oxaloacetate transaminase 1, soluble        | -769      | 0.8319    | acagcacGCGTGggaggaa  | +         |
| NM_010324 | 14718     | Got1      | glutamate oxaloacetate transaminase 1, soluble        | 360       | 0.8308    | ctgttctGCGTGaccttga  | -         |
| NM_010324 | 14718     | Got1      | glutamate oxaloacetate transaminase 1, soluble        | -772      | 0.8025    | ctccacGCGTGctgtcat   | -         |
| NM_010324 | 14718     | Got1      | glutamate oxaloacetate transaminase 1, soluble        | 165       | 0.8018    | AACCTGCGCGTGGAGgta   | +         |
| NM_010324 | 14718     | Got1      | glutamate oxaloacetate transaminase 1, soluble        | -255      | 0.7756    | tggcgtaGCGTGtccaat   | -         |
| NM_010274 | 14571     | Gpd2      | glycerol phosphate dehydrogenase 2, mitochondrial     | 105       | 0.8427    | CCCTTGCGCGTGACGACCG  | +         |
| NM_010274 | 14571     | Gpd2      | glycerol phosphate dehydrogenase 2, mitochondrial     | -385      | 0.7998    | gtggcccGCGTGgggaggg  | +         |
| NM_010274 | 14571     | Gpd2      | glycerol phosphate dehydrogenase 2, mitochondrial     | -1139     | 0.7992    | aaatttaGCGTGtccaagg  | +         |
| NM_010274 | 14571     | Gpd2      | glycerol phosphate dehydrogenase 2, mitochondrial     | -602      | 0.7685    | taccccaGCGTGtcttgt   | -         |
| NM_010357 | 14860     | Gsta4     | glutathione S-transferase, alpha 4                    | -1081     | 0.8753    | ctggagtGCGTGtcatgtt  | +         |
| NM_010357 | 14860     | Gsta4     | glutathione S-transferase, alpha 4                    | -466      | 0.8425    | aaaccatGCGTGcacattg  | +         |
| NM_010357 | 14860     | Gsta4     | glutathione S-transferase, alpha 4                    | -127      | 0.8073    | ctccataGCGTGtcttgt   | +         |
| NM_010357 | 14860     | Gsta4     | glutathione S-transferase, alpha 4                    | -294      | 0.7174    | attaaagGCGTGgaccact  | +         |
| NM_013541 | 14870     | Gstp1     | glutathione S-transferase, pi 1                       | -559      | 0.8275    | tctgtatGCGTGctgcacc  | +         |

|           |        |         |                                                |       |        |                     |   |
|-----------|--------|---------|------------------------------------------------|-------|--------|---------------------|---|
| NM_013541 | 14870  | Gstp1   | glutathione S-transferase, pi 1                | -11   | 0.8056 | ggcctacGCGTGcgtcctc | + |
| NM_013541 | 14870  | Gstp1   | glutathione S-transferase, pi 1                | 163   | 0.7831 | gcctgggGCGTGgggtggg | + |
| NM_019479 | 55927  | Hes6    | hairy and enhancer of split 6 (Drosophila)     | 595   | 0.8414 | cacagtaGCGTGtcccgtt | - |
| NM_019479 | 55927  | Hes6    | hairy and enhancer of split 6 (Drosophila)     | 921   | 0.8372 | TGCCGCTGCGTGAGGGTAG | + |
| NM_019479 | 55927  | Hes6    | hairy and enhancer of split 6 (Drosophila)     | -99   | 0.8281 | tggctgtGCGTGtctggag | - |
| NM_019479 | 55927  | Hes6    | hairy and enhancer of split 6 (Drosophila)     | 513   | 0.8205 | gtggcagGCGTGcccgttc | - |
| NM_019479 | 55927  | Hes6    | hairy and enhancer of split 6 (Drosophila)     | 439   | 0.8145 | GTGAGCGCGTGcAGGGCG  | + |
| NM_019479 | 55927  | Hes6    | hairy and enhancer of split 6 (Drosophila)     | -868  | 0.7999 | gaggtgaGCGTGgagaggg | + |
| NM_019479 | 55927  | Hes6    | hairy and enhancer of split 6 (Drosophila)     | -1119 | 0.7866 | gacacagGCGTGcctgttg | + |
| NM_146001 | 215114 | Hip1    | huntingtin interacting protein 1               | 826   | 0.9005 | gagctttGCGTGccgcgat | + |
| NM_146001 | 215114 | Hip1    | huntingtin interacting protein 1               | -1173 | 0.732  | attatagGCGTGgctcct  | - |
| NM_022882 | 64898  | Lpin2   | lipin 2                                        | -165  | 0.8024 | tcgcctcGCGTGggccacg | + |
| NM_022882 | 64898  | Lpin2   | lipin 2                                        | -432  | 0.7811 | ggcggggGCGTGtgcacag | + |
| NM_022882 | 64898  | Lpin2   | lipin 2                                        | -1323 | 0.7643 | cacttcaGCGTGgctcttc | - |
| NM_008509 | 16956  | Lpl     | lipoprotein lipase                             | 480   | 0.8657 | cgccgtaGCGTGatgggag | - |
| NM_008509 | 16956  | Lpl     | lipoprotein lipase                             | 686   | 0.8135 | ttggcccGCGTGcctgtga | - |
| NM_008509 | 16956  | Lpl     | lipoprotein lipase                             | -441  | 0.7948 | ctttggcGCGTGgggacct | + |
| NM_008509 | 16956  | Lpl     | lipoprotein lipase                             | 584   | 0.7779 | ggctgggGCGTGgggtgtg | + |
| NM_008509 | 16956  | Lpl     | lipoprotein lipase                             | 875   | 0.7624 | cgggaacGCGTGgcccaga | + |
| NM_008509 | 16956  | Lpl     | lipoprotein lipase                             | 156   | 0.7546 | ctacgcgGCGTGgggcagt | - |
| NM_008509 | 16956  | Lpl     | lipoprotein lipase                             | -330  | 0.721  | ttaaacaGCGTGtacctaa | - |
| NM_010766 | 17167  | Marco   | macrophage receptor with collagenous structure | 1311  | 0.8766 | cgccgctGCGTGtgcacac | - |
| NM_010766 | 17167  | Marco   | macrophage receptor with collagenous structure | 1328  | 0.83   | cgcacatGCGTGtgcagt  | + |
| NM_010766 | 17167  | Marco   | macrophage receptor with collagenous structure | 1315  | 0.797  | tgtgcgcGCGTGcgtgtgc | - |
| NM_010849 | 17869  | Myc     | myelocytomatosis oncogene                      | -387  | 0.8807 | gggacgtGCGTGacgcggt | + |
| NM_008714 | 18128  | Notch1  | Notch gene homolog 1 (Drosophila)              | 289   | 0.8558 | tgtcctgGCGTGtgaggag | + |
| NM_008714 | 18128  | Notch1  | Notch gene homolog 1 (Drosophila)              | 964   | 0.8439 | taagatgGCGTGgaggggg | + |
| NM_008714 | 18128  | Notch1  | Notch gene homolog 1 (Drosophila)              | 202   | 0.8414 | acccaaaGCGTGcgcaggg | - |
| NM_008714 | 18128  | Notch1  | Notch gene homolog 1 (Drosophila)              | -152  | 0.804  | cgcagggGCGTGggggcca | + |
| NM_008714 | 18128  | Notch1  | Notch gene homolog 1 (Drosophila)              | -703  | 0.7885 | gcgttgcGCGTGtctgtc  | - |
| NM_008714 | 18128  | Notch1  | Notch gene homolog 1 (Drosophila)              | 719   | 0.7718 | aggggtgGCGTGgactga  | + |
| NM_008706 | 18104  | Nqo1    | NAD(P)H dehydrogenase, quinone 1               | -326  | 0.9009 | tcocctaGCGTGcaaaagt | + |
| NM_008706 | 18104  | Nqo1    | NAD(P)H dehydrogenase, quinone 1               | 588   | 0.7416 | aaatcagGCGTGgtqatat | - |
| NM_011044 | 18534  | Pck1    | phosphoenolpyruvate carboxykinase 1, cytosolic | 800   | 0.8016 | ggacctgGCGTGggcaaga | + |
| NM_011044 | 18534  | Pck1    | phosphoenolpyruvate carboxykinase 1, cytosolic | 1124  | 0.7684 | ctgcaaaGCGTGgcccacg | + |
| NM_009396 | 21928  | Tnfaip2 | tumor necrosis factor, alpha-induced protein 2 | -1078 | 0.7983 | tgacctgGCGTGatccagg | - |
| NM_009396 | 21928  | Tnfaip2 | tumor necrosis factor, alpha-induced protein 2 | 848   | 0.7917 | cgccggcGCGTGcctcca  | - |
| NM_009396 | 21928  | Tnfaip2 | tumor necrosis factor, alpha-induced protein 2 | 72    | 0.7244 | atgtagaGCGTGccttttg | - |
| NM_009466 | 22235  | Ugdh    | UDP-glucose dehydrogenase                      | -300  | 0.9092 | cgtggctGCGTGcgcgct  | - |
| NM_009466 | 22235  | Ugdh    | UDP-glucose dehydrogenase                      | -426  | 0.8757 | ggttcgcGCGTGccaagtg | - |
| NM_009466 | 22235  | Ugdh    | UDP-glucose dehydrogenase                      | 571   | 0.8212 | atgaactGCGTGagccaca | - |
| NM_009466 | 22235  | Ugdh    | UDP-glucose dehydrogenase                      | -876  | 0.8179 | ttaatttGCGTGtgtgtg  | - |
| NM_009466 | 22235  | Ugdh    | UDP-glucose dehydrogenase                      | -761  | 0.8021 | cctccagGCGTGgcccgcc | + |
| NM_009466 | 22235  | Ugdh    | UDP-glucose dehydrogenase                      | -292  | 0.7691 | gcgctggGCGTGgctcgct | - |
| NM_009466 | 22235  | Ugdh    | UDP-glucose dehydrogenase                      | -1093 | 0.7512 | agatagaGCGTGtctcct  | + |
| NM_009466 | 22235  | Ugdh    | UDP-glucose dehydrogenase                      | -214  | 0.7471 | tcaagggGCGTGgtcatac | + |
| NM_009466 | 22235  | Ugdh    | UDP-glucose dehydrogenase                      | -1317 | 0.7446 | aaagtggGCGTGgcggtaa | + |
| NM_011723 | 22436  | Xdh     | xanthine dehydrogenase                         | 1051  | 0.8774 | aaagtttGCGTGctagtta | - |
| NM_011723 | 22436  | Xdh     | xanthine dehydrogenase                         | -620  | 0.7874 | ctctcgcGCGTGccttata | - |
| NM_133348 | 70025  |         | brain acyl-CoA hydrolase                       | -278  | 0.9023 | ggccgctGCGTGcgtggct | - |
| NM_133348 | 70025  |         | brain acyl-CoA hydrolase                       | -282  | 0.8487 | cgtgcgtGCGTGgctgcgg | - |
| NM_133348 | 70025  |         | brain acyl-CoA hydrolase                       | -274  | 0.8408 | ccggggcGCGTGcgtgcgt | - |
| NM_133348 | 70025  |         | brain acyl-CoA hydrolase                       | -234  | 0.8345 | ccagcctGCGTGgtgtccg | + |
| NM_133348 | 70025  |         | brain acyl-CoA hydrolase                       | -191  | 0.8292 | cgccggcGCGTGcagtgtg | + |
| NM_133348 | 70025  |         | brain acyl-CoA hydrolase                       | -911  | 0.7972 | tgtttagGCGTGtgccac  | + |
| NM_133348 | 70025  |         | brain acyl-CoA hydrolase                       | 315   | 0.7679 | gcccgggGCGTGgagccgg | - |
| NM_133348 | 70025  |         | brain acyl-CoA hydrolase                       | -472  | 0.759  | tggcaccGCGTGctgtagg | + |
| NM_133348 | 70025  |         | brain acyl-CoA hydrolase                       | 182   | 0.7565 | gcggccgGCGTGtctgtgg | - |

**RefSeq** RefSeq (mRNA)  
**Match\_Ind** Location relative to TSS  
**Mat\_Score** Matrix similarity score based on 13 bonafide DREs (19 nucleotides in matrix)  
**DRE\_Seq** Acual 19 bp sequence  
**Match\_Str** Plus or minus strand
