# Supplementary material for: Temporal and Dose-Dependent Hepatic Gene Expression Patterns in Mice Provide New Insights into TCDD-Mediated Hepatotoxicity
Source: Oxford University Press journal article supplement (doi:10.1093/toxsci/kfi162), 2005-03-30
Supplement: kfi162_Supplementary_Data.zip [file kfi162_Supplementary_Data.zip › kfi162supptable5.xls]

## Sheet: Sheet1
SupplTable 5. DREs identifed in promoter sequences (-1500 to +1500 of the transcriptional start site) for genes listed in Table 3
refseq	locuslink	gene_abbr	gene_name	match_ind	mat_score	dre_seq	match_str
NM_025341	66082	Abhd6	abhydrolase domain containing 6	709	0.8379	gagatctGCGTGcctctgt	+
NM_025341	66082	Abhd6	abhydrolase domain containing 6	1187	0.8009	tggctgaGCGTGatttgaa	+
NM_009692	11806	Apoa1	apolipoprotein A-I	310	0.8291	ttgacctGCGTGggactac	+
NM_009692	11806	Apoa1	apolipoprotein A-I	577	0.8056	agacctaGCGTGgggcctg	+
NM_009811	12368	Casp6	caspase 6	-132	0.8105	agaaaccGCGTGccttggc	-
NM_173047	109857	Cbr3	carbonyl reductase 3	1185	0.9357	gcgccttGCGTGagagcca	+
NM_173047	109857	Cbr3	carbonyl reductase 3	-650	0.907	tctgattGCGTGcccacat	+
NM_173047	109857	Cbr3	carbonyl reductase 3	686	0.8608	ccttcgtGCGTGggacaga	-
NM_173047	109857	Cbr3	carbonyl reductase 3	487	0.8507	gcgctctGCGTGgcgagtt	+
NM_173047	109857	Cbr3	carbonyl reductase 3	749	0.8444	tcgcttcGCGTGaaacaag	+
NM_173047	109857	Cbr3	carbonyl reductase 3	148	0.8412	CGATCACGCGTGACCTGTG	+
NM_173047	109857	Cbr3	carbonyl reductase 3	27	0.8295	TGACCACGCGTGACCCGCT	+
NM_173047	109857	Cbr3	carbonyl reductase 3	145	0.7873	aggtcacGCGTGatcgcaa	-
NM_173047	109857	Cbr3	carbonyl reductase 3	252	0.7829	ggtggaaGCGTGggctcag	-
NM_173047	109857	Cbr3	carbonyl reductase 3	1496	0.7594	gacatgaGCGTGgctgatg	+
NM_173047	109857	Cbr3	carbonyl reductase 3	24	0.7573	gggtcacGCGTGgtcaaaa	-
NM_173047	109857	Cbr3	carbonyl reductase 3	-633	0.7503	attccagGCGTGtctaaat	-
NM_173047	109857	Cbr3	carbonyl reductase 3	99	0.7415	TGCAGCCGCGTGGCCCTGG	+
NM_173047	109857	Cbr3	carbonyl reductase 3	654	0.7406	tgacaagGCGTGgtcccct	-
NM_009992	13076	Cyp1a1	cytochrome P450, family 1, subfamily a, polypeptide 1	-984	0.9805	cggagttGCGTGagaagag	-
NM_009992	13076	Cyp1a1	cytochrome P450, family 1, subfamily a, polypeptide 1	-1206	0.973	cgggtttGCGTGcgatgct	-
NM_009992	13076	Cyp1a1	cytochrome P450, family 1, subfamily a, polypeptide 1	-871	0.9499	cctgtgtGCGTGccaagca	+
NM_009992	13076	Cyp1a1	cytochrome P450, family 1, subfamily a, polypeptide 1	-491	0.9394	caagctcGCGTGagaagcg	-
NM_009992	13076	Cyp1a1	cytochrome P450, family 1, subfamily a, polypeptide 1	-1059	0.9133	ccagctaGCGTGacagcac	+
NM_009992	13076	Cyp1a1	cytochrome P450, family 1, subfamily a, polypeptide 1	-895	0.8585	gaggctaGCGTGcgtaagc	-
NM_009992	13076	Cyp1a1	cytochrome P450, family 1, subfamily a, polypeptide 1	-1294	0.8377	cagctagGCGTGccgggtg	+
NM_009992	13076	Cyp1a1	cytochrome P450, family 1, subfamily a, polypeptide 1	-1277	0.8354	tggtgctGCGTGtcctgcc	+
NM_009992	13076	Cyp1a1	cytochrome P450, family 1, subfamily a, polypeptide 1	-1382	0.8002	gaacttgGCGTGtctaact	-
NM_009992	13076	Cyp1a1	cytochrome P450, family 1, subfamily a, polypeptide 1	-822	0.796	ctgtctcGCGTGgatcctt	+
NM_009992	13076	Cyp1a1	cytochrome P450, family 1, subfamily a, polypeptide 1	-1249	0.7825	ctgaacaGCGTGtgtccac	-
NM_009992	13076	Cyp1a1	cytochrome P450, family 1, subfamily a, polypeptide 1	-52	0.7609	taaggagGCGTGgccaaca	+
NM_011303	20148	Dhrs3	dehydrogenase/reductase (SDR family) member 3	684	0.904	cctccctGCGTGccagagt	-
NM_011303	20148	Dhrs3	dehydrogenase/reductase (SDR family) member 3	-719	0.8574	cctaggcGCGTGccccgcc	+
NM_011303	20148	Dhrs3	dehydrogenase/reductase (SDR family) member 3	600	0.773	TCGCAGAGCGTGGCGCCAG	+
NM_011303	20148	Dhrs3	dehydrogenase/reductase (SDR family) member 3	-566	0.7619	agctgcgGCGTGgaccgaa	-
NM_011303	20148	Dhrs3	dehydrogenase/reductase (SDR family) member 3	623	0.7488	gtacacgGCGTGggggcgg	+
NM_011303	20148	Dhrs3	dehydrogenase/reductase (SDR family) member 3	-839	0.7398	ggttgcaGCGTGttcgagt	+
NM_010145	13849	Ephx1	epoxide hydrolase 1, microsomal	71	0.8456	cactccaGCGTGagagttg	+
NM_010145	13849	Ephx1	epoxide hydrolase 1, microsomal	720	0.8227	tggctgtGCGTGgtctgac	+
NM_010145	13849	Ephx1	epoxide hydrolase 1, microsomal	144	0.8088	gatccagGCGTGcaatagg	+
NM_010145	13849	Ephx1	epoxide hydrolase 1, microsomal	-377	0.7988	gtgtctcGCGTGggcaagg	-
NM_010145	13849	Ephx1	epoxide hydrolase 1, microsomal	790	0.7778	aacgtggGCGTGttcagca	+
NM_010634	16592	Fabp5	fatty acid binding protein 5, epidermal	341	0.9138	cacaggtGCGTGccagcgg	+
NM_010634	16592	Fabp5	fatty acid binding protein 5, epidermal	462	0.8376	tcccctgGCGTGgcagcac	+
NM_010634	16592	Fabp5	fatty acid binding protein 5, epidermal	-1306	0.8366	cagggcaGCGTGactgcag	+
NM_010634	16592	Fabp5	fatty acid binding protein 5, epidermal	559	0.7979	ggacaccGCGTGgtagggc	+
NM_010634	16592	Fabp5	fatty acid binding protein 5, epidermal	-118	0.7931	agtccggGCGTGgcgaggg	+
NM_010634	16592	Fabp5	fatty acid binding protein 5, epidermal	669	0.7596	tggctagGCGTGgcgcccg	+
NM_010634	16592	Fabp5	fatty acid binding protein 5, epidermal	569	0.7268	tggtaggGCGTGgtttctg	+
NM_008655	17873	Gadd45b	growth arrest and DNA-damage-inducible 45 beta	-1443	0.8991	ggaagctGCGTGagcagag	+
NM_008655	17873	Gadd45b	growth arrest and DNA-damage-inducible 45 beta	-1394	0.8858	gtccctgGCGTGagaggcg	-
NM_008655	17873	Gadd45b	growth arrest and DNA-damage-inducible 45 beta	-207	0.8055	gggaggaGCGTGaacgcca	-
NM_008655	17873	Gadd45b	growth arrest and DNA-damage-inducible 45 beta	512	0.7884	ggagcgcGCGTGcatcaga	-
NM_008655	17873	Gadd45b	growth arrest and DNA-damage-inducible 45 beta	-1208	0.7882	tagacccGCGTGggattct	-
NM_008655	17873	Gadd45b	growth arrest and DNA-damage-inducible 45 beta	-1059	0.778	cttccacGCGTGtcattta	-
NM_008655	17873	Gadd45b	growth arrest and DNA-damage-inducible 45 beta	-66	0.7753	ggtggagGCGTGgccactg	-
NM_008655	17873	Gadd45b	growth arrest and DNA-damage-inducible 45 beta	486	0.7725	ttctcggGCGTGggtgggg	+
NM_008655	17873	Gadd45b	growth arrest and DNA-damage-inducible 45 beta	-1056	0.7706	atgacacGCGTGgaagaag	+
NM_008655	17873	Gadd45b	growth arrest and DNA-damage-inducible 45 beta	951	0.7529	CCCGACAGCGTGGTCTTGT	+
NM_008086	14451	Gas1	growth arrest specific 1	1201	0.8011	AACGACTGCGTGTGCGATG	+
NM_008086	14451	Gas1	growth arrest specific 1	994	0.7725	ACCAGCAGCGTGGGCCCGG	+
NM_008086	14451	Gas1	growth arrest specific 1	893	0.7667	ccgcggcGCGTGtggttga	-
NM_010292	103988	Gck	glucokinase	-1259	0.7337	tcccaggGCGTGgtctctt	-
NM_010302	14673	Gna12	guanine nucleotide binding protein, alpha 12	1197	0.8856	acttcatGCGTGctaggga	+
NM_010302	14673	Gna12	guanine nucleotide binding protein, alpha 12	-131	0.8211	tggacaaGCGTGccttgga	-
NM_010324	14718	Got1	glutamate oxaloacetate transaminase 1, soluble	-930	0.8429	ccaaacaGCGTGttaagag	+
NM_010324	14718	Got1	glutamate oxaloacetate transaminase 1, soluble	-769	0.8319	acagcacGCGTGggaggaa	+
NM_010324	14718	Got1	glutamate oxaloacetate transaminase 1, soluble	360	0.8308	ctgttctGCGTGaccttga	-
NM_010324	14718	Got1	glutamate oxaloacetate transaminase 1, soluble	-772	0.8025	ctcccacGCGTGctgtcat	-
NM_010324	14718	Got1	glutamate oxaloacetate transaminase 1, soluble	165	0.8018	AACCTCGGCGTGGGAGgta	+
NM_010324	14718	Got1	glutamate oxaloacetate transaminase 1, soluble	-255	0.7756	tggcgtaGCGTGttccaat	-
NM_010274	14571	Gpd2	glycerol phosphate dehydrogenase 2, mitochondrial	105	0.8427	CCCTTGCGCGTGACGACCG	+
NM_010274	14571	Gpd2	glycerol phosphate dehydrogenase 2, mitochondrial	-385	0.7998	gtggcccGCGTGgggaggg	+
NM_010274	14571	Gpd2	glycerol phosphate dehydrogenase 2, mitochondrial	-1139	0.7992	aaatttaGCGTGtccaagg	+
NM_010274	14571	Gpd2	glycerol phosphate dehydrogenase 2, mitochondrial	-602	0.7685	taccccaGCGTGttctgtg	-
NM_010357	14860	Gsta4	glutathione S-transferase, alpha 4	-1081	0.8753	ctgggatGCGTGtcatggt	+
NM_010357	14860	Gsta4	glutathione S-transferase, alpha 4	-466	0.8425	aaaccatGCGTGcacattg	+
NM_010357	14860	Gsta4	glutathione S-transferase, alpha 4	-127	0.8073	ctccataGCGTGctcttgt	+
NM_010357	14860	Gsta4	glutathione S-transferase, alpha 4	-294	0.7174	attaaagGCGTGgaccact	+
NM_013541	14870	Gstp1	glutathione S-transferase, pi 1	-559	0.8275	tctgtatGCGTGctgcacc	+
NM_013541	14870	Gstp1	glutathione S-transferase, pi 1	-11	0.8056	ggcctacGCGTGcgtcctc	+
NM_013541	14870	Gstp1	glutathione S-transferase, pi 1	163	0.7831	gcctgggGCGTGgggtggg	+
NM_019479	55927	Hes6	hairy and enhancer of split 6 (Drosophila)	595	0.8414	cacagtaGCGTGtcccgtt	-
NM_019479	55927	Hes6	hairy and enhancer of split 6 (Drosophila)	921	0.8372	TGCCGCTGCGTGAGGGTAG	+
NM_019479	55927	Hes6	hairy and enhancer of split 6 (Drosophila)	-99	0.8281	tggctgtGCGTGgtcggag	-
NM_019479	55927	Hes6	hairy and enhancer of split 6 (Drosophila)	513	0.8205	gtggcagGCGTGcccggtc	-
NM_019479	55927	Hes6	hairy and enhancer of split 6 (Drosophila)	439	0.8145	GTGAGGCGCGTGCAGGGCG	+
NM_019479	55927	Hes6	hairy and enhancer of split 6 (Drosophila)	-868	0.7999	gaggtgaGCGTGgagaggg	+
NM_019479	55927	Hes6	hairy and enhancer of split 6 (Drosophila)	-1119	0.7866	gacacagGCGTGcctgttg	+
NM_146001	215114	Hip1	huntingtin interacting protein 1	826	0.9005	gagctttGCGTGccggcat	+
NM_146001	215114	Hip1	huntingtin interacting protein 1	-1173	0.732	attatagGCGTGggcctct	-
NM_022882	64898	Lpin2	lipin 2	-165	0.8024	tcgcctcGCGTGggccacg	+
NM_022882	64898	Lpin2	lipin 2	-432	0.7811	gggcgggGCGTGtgcgcag	+
NM_022882	64898	Lpin2	lipin 2	-1323	0.7643	cacttcaGCGTGgctcttc	-
NM_008509	16956	Lpl	lipoprotein lipase	480	0.8657	cgccgtaGCGTGatgggag	-
NM_008509	16956	Lpl	lipoprotein lipase	686	0.8135	ttggcccGCGTGccttgca	-
NM_008509	16956	Lpl	lipoprotein lipase	-441	0.7948	ctttggcGCGTGgggacct	+
NM_008509	16956	Lpl	lipoprotein lipase	584	0.7779	ggctgggGCGTGgggtgtg	+
NM_008509	16956	Lpl	lipoprotein lipase	875	0.7624	cgggaacGCGTGgcgcaga	+
NM_008509	16956	Lpl	lipoprotein lipase	156	0.7546	ctacgcgGCGTGgggcagt	-
NM_008509	16956	Lpl	lipoprotein lipase	-330	0.721	ttaaacaGCGTGtacctaa	-
NM_010766	17167	Marco	macrophage receptor with collagenous structure	1311	0.8766	cgcgcgtGCGTGtgcacac	-
NM_010766	17167	Marco	macrophage receptor with collagenous structure	1328	0.83	cgcacatGCGTGtgtcagt	+
NM_010766	17167	Marco	macrophage receptor with collagenous structure	1315	0.797	tgtgcgcGCGTGcgtgtgc	-
NM_010849	17869	Myc	myelocytomatosis oncogene	-387	0.8807	gggacgtGCGTGacgcggt	+
NM_008714	18128	Notch1	Notch gene homolog 1 (Drosophila)	289	0.8558	tgtcctgGCGTGtgaggag	+
NM_008714	18128	Notch1	Notch gene homolog 1 (Drosophila)	964	0.8439	taagatgGCGTGggagggg	+
NM_008714	18128	Notch1	Notch gene homolog 1 (Drosophila)	202	0.8414	acccaaaGCGTGcgcaggg	-
NM_008714	18128	Notch1	Notch gene homolog 1 (Drosophila)	-152	0.804	cgcagggGCGTGgggcgca	+
NM_008714	18128	Notch1	Notch gene homolog 1 (Drosophila)	-703	0.7885	gcgttgcGCGTGtcctgtc	-
NM_008714	18128	Notch1	Notch gene homolog 1 (Drosophila)	719	0.7718	agggtggGCGTGggactga	+
NM_008706	18104	Nqo1	NAD(P)H dehydrogenase, quinone 1	-326	0.9009	tcccctaGCGTGcaaaggt	+
NM_008706	18104	Nqo1	NAD(P)H dehydrogenase, quinone 1	588	0.7416	aaatcagGCGTGgtgatat	-
NM_011044	18534	Pck1	phosphoenolpyruvate carboxykinase 1, cytosolic	800	0.8016	ggacctgGCGTGggcaaga	+
NM_011044	18534	Pck1	phosphoenolpyruvate carboxykinase 1, cytosolic	1124	0.7684	ctgcaaaGCGTGgcccacg	+
NM_009396	21928	Tnfaip2	tumor necrosis factor, alpha-induced protein 2	-1078	0.7983	tgacctgGCGTGatccagg	-
NM_009396	21928	Tnfaip2	tumor necrosis factor, alpha-induced protein 2	848	0.7917	cgcgggcGCGTGgcctcca	-
NM_009396	21928	Tnfaip2	tumor necrosis factor, alpha-induced protein 2	72	0.7244	atgtagaGCGTGgcttttg	-
NM_009466	22235	Ugdh	UDP-glucose dehydrogenase	-300	0.9092	cgtggctGCGTGcgccgct	-
NM_009466	22235	Ugdh	UDP-glucose dehydrogenase	-426	0.8757	ggttcgcGCGTGccaagtg	-
NM_009466	22235	Ugdh	UDP-glucose dehydrogenase	571	0.8212	atgaactGCGTGagccaca	-
NM_009466	22235	Ugdh	UDP-glucose dehydrogenase	-876	0.8179	ttaatttGCGTGtgtgtgt	-
NM_009466	22235	Ugdh	UDP-glucose dehydrogenase	-761	0.8021	cctccagGCGTGggcgccc	+
NM_009466	22235	Ugdh	UDP-glucose dehydrogenase	-292	0.7691	gcgctggGCGTGgctgcgt	-
NM_009466	22235	Ugdh	UDP-glucose dehydrogenase	-1093	0.7512	agatagaGCGTGgtctcct	+
NM_009466	22235	Ugdh	UDP-glucose dehydrogenase	-214	0.7471	tcaagggGCGTGgtcatac	+
NM_009466	22235	Ugdh	UDP-glucose dehydrogenase	-1317	0.7446	aaagtggGCGTGgcggtaa	+
NM_011723	22436	Xdh	xanthine dehydrogenase	1051	0.8774	aaagtttGCGTGctagtta	-
NM_011723	22436	Xdh	xanthine dehydrogenase	-620	0.7874	ctctcggGCGTGccttata	-
NM_133348	70025		brain acyl-CoA hydrolase	-278	0.9023	ggcgcgtGCGTGcgtggct	-
NM_133348	70025		brain acyl-CoA hydrolase	-282	0.8487	cgtgcgtGCGTGgctgcgg	-
NM_133348	70025		brain acyl-CoA hydrolase	-274	0.8408	ccggggcGCGTGcgtgcgt	-
NM_133348	70025		brain acyl-CoA hydrolase	-234	0.8345	ccagcctGCGTGgtgtccg	+
NM_133348	70025		brain acyl-CoA hydrolase	-191	0.8292	cgccggcGCGTGcagtgtg	+
NM_133348	70025		brain acyl-CoA hydrolase	-911	0.7972	ttgtttaGCGTGtgcccac	+
NM_133348	70025		brain acyl-CoA hydrolase	315	0.7679	gccgggaGCGTGgagccgg	-
NM_133348	70025		brain acyl-CoA hydrolase	-472	0.759	tggcaccGCGTGctgtagg	+
NM_133348	70025		brain acyl-CoA hydrolase	182	0.7565	gcggccgGCGTGtctgtgg	-
RefSeq	RefSeq (mRNA)
Match_Ind	Location relative to TSS
Mat_Score	Matrix simiarity score based on 13 bonafide DREs (19 nucleotides in matrix)
DRE_Seq	Acual 19 bp sequence
Match_Str	Plus or minus strand
